# Supplementary material for: A Network Pharmacology-Based Study on Irritable Bowel Syndrome Prevention and Treatment Utilizing Shenling Baizhu Powder
Source: Biomed Res Int. 2021 Nov 23;2021:4579850. doi: 10.1155/2021/4579850 (PMC8632384; doi:10.1155/2021/4579850)
Supplement: Supplementary Materials — Please find detailed data in the supplementary file, including the original data of SymMap, metabolomics, and molecular docking of Shenling Baizhu powder. “Shenling Baizhu powder SymMap” includes all herbal targets and combined targets. “Shenling Baizhu powder metabolomics” includes two-dimensional structural data analysis. “Molecular docking” involves molecule-target docking and the results. [file 4579850.f1.zip]

Archive with 142 entries (135 files):
- Data in brief/
- Data in brief/1. Shenling Baizhu powder Symmap/
- Data in brief/1. Shenling Baizhu powder Symmap/Amomum villosum.csv
- Data in brief/1. Shenling Baizhu powder Symmap/Atractylodes macrocephala.csv
- Data in brief/1. Shenling Baizhu powder Symmap/Coix seed.csv
- Data in brief/1. Shenling Baizhu powder Symmap/Ginseng.csv
- Data in brief/1. Shenling Baizhu powder Symmap/Liquorice.csv
- Data in brief/1. Shenling Baizhu powder Symmap/Lotus seed.csv
- Data in brief/1. Shenling Baizhu powder Symmap/Platycodon grandiflorum.csv
- Data in brief/1. Shenling Baizhu powder Symmap/Poria cocos.csv
- Data in brief/1. Shenling Baizhu powder Symmap/White lentils.csv
- Data in brief/1. Shenling Baizhu powder Symmap/Yam.csv
- Data in brief/1. Shenling Baizhu powder Symmap/!Combined target.xlsx
- Data in brief/2. Shenling Baizhu powder Metabolomics/
- Data in brief/2. Shenling Baizhu powder Metabolomics/2D structure/
- Data in brief/2. Shenling Baizhu powder Metabolomics/2D structure/1.csv
- Data in brief/2. Shenling Baizhu powder Metabolomics/2D structure/10.csv
- Data in brief/2. Shenling Baizhu powder Metabolomics/2D structure/11.csv
- Data in brief/2. Shenling Baizhu powder Metabolomics/2D structure/12.csv
- Data in brief/2. Shenling Baizhu powder Metabolomics/2D structure/13.csv
- Data in brief/2. Shenling Baizhu powder Metabolomics/2D structure/14.csv
- Data in brief/2. Shenling Baizhu powder Metabolomics/2D structure/15.csv
- Data in brief/2. Shenling Baizhu powder Metabolomics/2D structure/16.csv
- Data in brief/2. Shenling Baizhu powder Metabolomics/2D structure/17.csv
- Data in brief/2. Shenling Baizhu powder Metabolomics/2D structure/18.csv
- Data in brief/2. Shenling Baizhu powder Metabolomics/2D structure/19.csv
- Data in brief/2. Shenling Baizhu powder Metabolomics/2D structure/2.csv
- Data in brief/2. Shenling Baizhu powder Metabolomics/2D structure/20.csv
- Data in brief/2. Shenling Baizhu powder Metabolomics/2D structure/21.csv
- Data in brief/2. Shenling Baizhu powder Metabolomics/2D structure/22.csv
- Data in brief/2. Shenling Baizhu powder Metabolomics/2D structure/23.csv
- Data in brief/2. Shenling Baizhu powder Metabolomics/2D structure/24.csv
- Data in brief/2. Shenling Baizhu powder Metabolomics/2D structure/25.csv
- Data in brief/2. Shenling Baizhu powder Metabolomics/2D structure/26.csv
- Data in brief/2. Shenling Baizhu powder Metabolomics/2D structure/27.csv
- Data in brief/2. Shenling Baizhu powder Metabolomics/2D structure/28.csv
- Data in brief/2. Shenling Baizhu powder Metabolomics/2D structure/29.csv
- Data in brief/2. Shenling Baizhu powder Metabolomics/2D structure/3.csv
- Data in brief/2. Shenling Baizhu powder Metabolomics/2D structure/30.csv
- Data in brief/2. Shenling Baizhu powder Metabolomics/2D structure/31.csv
- Data in brief/2. Shenling Baizhu powder Metabolomics/2D structure/32.csv
- Data in brief/2. Shenling Baizhu powder Metabolomics/2D structure/33.csv
- Data in brief/2. Shenling Baizhu powder Metabolomics/2D structure/34.csv
- Data in brief/2. Shenling Baizhu powder Metabolomics/2D structure/35.csv
- Data in brief/2. Shenling Baizhu powder Metabolomics/2D structure/36.csv
- Data in brief/2. Shenling Baizhu powder Metabolomics/2D structure/37.csv
- Data in brief/2. Shenling Baizhu powder Metabolomics/2D structure/38.csv
- Data in brief/2. Shenling Baizhu powder Metabolomics/2D structure/39.csv
- Data in brief/2. Shenling Baizhu powder Metabolomics/2D structure/4.csv
- Data in brief/2. Shenling Baizhu powder Metabolomics/2D structure/40.csv
- Data in brief/2. Shenling Baizhu powder Metabolomics/2D structure/41.csv
- Data in brief/2. Shenling Baizhu powder Metabolomics/2D structure/42.csv
- Data in brief/2. Shenling Baizhu powder Metabolomics/2D structure/43.csv
- Data in brief/2. Shenling Baizhu powder Metabolomics/2D structure/44.csv
- Data in brief/2. Shenling Baizhu powder Metabolomics/2D structure/45.csv
- Data in brief/2. Shenling Baizhu powder Metabolomics/2D structure/46.csv
- Data in brief/2. Shenling Baizhu powder Metabolomics/2D structure/47.csv
- Data in brief/2. Shenling Baizhu powder Metabolomics/2D structure/48.csv
- Data in brief/2. Shenling Baizhu powder Metabolomics/2D structure/49.csv
- Data in brief/2. Shenling Baizhu powder Metabolomics/2D structure/5.csv
- Data in brief/2. Shenling Baizhu powder Metabolomics/2D structure/50.csv
- Data in brief/2. Shenling Baizhu powder Metabolomics/2D structure/51.csv
- Data in brief/2. Shenling Baizhu powder Metabolomics/2D structure/52.csv
- Data in brief/2. Shenling Baizhu powder Metabolomics/2D structure/53.csv
- Data in brief/2. Shenling Baizhu powder Metabolomics/2D structure/54.csv
- Data in brief/2. Shenling Baizhu powder Metabolomics/2D structure/55.csv
- Data in brief/2. Shenling Baizhu powder Metabolomics/2D structure/56.csv
- Data in brief/2. Shenling Baizhu powder Metabolomics/2D structure/57.csv
- Data in brief/2. Shenling Baizhu powder Metabolomics/2D structure/58.csv
- Data in brief/2. Shenling Baizhu powder Metabolomics/2D structure/59.csv
- Data in brief/2. Shenling Baizhu powder Metabolomics/2D structure/6.csv
- Data in brief/2. Shenling Baizhu powder Metabolomics/2D structure/60.csv
- Data in brief/2. Shenling Baizhu powder Metabolomics/2D structure/61.csv
- Data in brief/2. Shenling Baizhu powder Metabolomics/2D structure/62.csv
- Data in brief/2. Shenling Baizhu powder Metabolomics/2D structure/63.csv
- Data in brief/2. Shenling Baizhu powder Metabolomics/2D structure/64.csv
- Data in brief/2. Shenling Baizhu powder Metabolomics/2D structure/65.csv
- Data in brief/2. Shenling Baizhu powder Metabolomics/2D structure/66.csv
- Data in brief/2. Shenling Baizhu powder Metabolomics/2D structure/67.csv
- Data in brief/2. Shenling Baizhu powder Metabolomics/2D structure/68.csv
- Data in brief/2. Shenling Baizhu powder Metabolomics/2D structure/69.csv
- Data in brief/2. Shenling Baizhu powder Metabolomics/2D structure/7.csv
- Data in brief/2. Shenling Baizhu powder Metabolomics/2D structure/70.csv
- Data in brief/2. Shenling Baizhu powder Metabolomics/2D structure/71.csv
- Data in brief/2. Shenling Baizhu powder Metabolomics/2D structure/72.csv
- Data in brief/2. Shenling Baizhu powder Metabolomics/2D structure/73.csv
- Data in brief/2. Shenling Baizhu powder Metabolomics/2D structure/74.csv
- Data in brief/2. Shenling Baizhu powder Metabolomics/2D structure/75.csv
- Data in brief/2. Shenling Baizhu powder Metabolomics/2D structure/76.csv
- Data in brief/2. Shenling Baizhu powder Metabolomics/2D structure/77.csv
- Data in brief/2. Shenling Baizhu powder Metabolomics/2D structure/78.csv
- Data in brief/2. Shenling Baizhu powder Metabolomics/2D structure/79.csv
- Data in brief/2. Shenling Baizhu powder Metabolomics/2D structure/8.csv
- Data in brief/2. Shenling Baizhu powder Metabolomics/2D structure/80.csv
- Data in brief/2. Shenling Baizhu powder Metabolomics/2D structure/81.csv
- Data in brief/2. Shenling Baizhu powder Metabolomics/2D structure/9.csv
- Data in brief/2. Shenling Baizhu powder Metabolomics/Analysis data.xlsx
- Data in brief/3. Molecular docking/
- Data in brief/3. Molecular docking/Molecular-targets for docking/
- Data in brief/3. Molecular docking/Molecular-targets for docking/1tnf.pdb
- Data in brief/3. Molecular docking/Molecular-targets for docking/1tnf.pdbqt
- Data in brief/3. Molecular docking/Molecular-targets for docking/22.Eucommiol.mol2
- Data in brief/3. Molecular docking/Molecular-targets for docking/22.Eucommiol.sdf
- Data in brief/3. Molecular docking/Molecular-targets for docking/43.Calycosin.mol2
- Data in brief/3. Molecular docking/Molecular-targets for docking/43.Calycosin.sdf
- Data in brief/3. Molecular docking/Molecular-targets for docking/49.n-cis-Feruloyltyramine.mol2
- Data in brief/3. Molecular docking/Molecular-targets for docking/49.n-cis-Feruloyltyramine.sdf
- Data in brief/3. Molecular docking/Molecular-targets for docking/74.cdxml
- Data in brief/3. Molecular docking/Molecular-targets for docking/74.mol2
- Data in brief/3. Molecular docking/Molecular-targets for docking/75.cdx
- Data in brief/3. Molecular docking/Molecular-targets for docking/75.mol2
- Data in brief/3. Molecular docking/Molecular-targets for docking/76.cdx
- Data in brief/3. Molecular docking/Molecular-targets for docking/76.mol2
- Data in brief/3. Molecular docking/Molecular-targets for docking/79.Ononin.mol2
- Data in brief/3. Molecular docking/Molecular-targets for docking/79.Ononin.sdf
- Data in brief/3. Molecular docking/Molecular-targets for docking/80.cdx
- Data in brief/3. Molecular docking/Molecular-targets for docking/80.mol2
- Data in brief/3. Molecular docking/Results of molecular docking/
- Data in brief/3. Molecular docking/Results of molecular docking/22-1.pdb
- Data in brief/3. Molecular docking/Results of molecular docking/22-2.pdb
- Data in brief/3. Molecular docking/Results of molecular docking/22-3.pdb
- Data in brief/3. Molecular docking/Results of molecular docking/42-1.pdb
- Data in brief/3. Molecular docking/Results of molecular docking/42-2.pdb
- Data in brief/3. Molecular docking/Results of molecular docking/42-3.pdb
- Data in brief/3. Molecular docking/Results of molecular docking/49-1.pdb
- Data in brief/3. Molecular docking/Results of molecular docking/49-2.pdb
- Data in brief/3. Molecular docking/Results of molecular docking/49-3.pdb
- Data in brief/3. Molecular docking/Results of molecular docking/74-1.pdb
- Data in brief/3. Molecular docking/Results of molecular docking/74-2.pdb
- Data in brief/3. Molecular docking/Results of molecular docking/74-3.pdb
- Data in brief/3. Molecular docking/Results of molecular docking/75-1.pdb
- Data in brief/3. Molecular docking/Results of molecular docking/75-2.pdb
- Data in brief/3. Molecular docking/Results of molecular docking/75-3.pdb
- Data in brief/3. Molecular docking/Results of molecular docking/76-1.pdb
- Data in brief/3. Molecular docking/Results of molecular docking/76-2.pdb
- Data in brief/3. Molecular docking/Results of molecular docking/76-3.pdb
- Data in brief/3. Molecular docking/Results of molecular docking/79-1.pdb
- Data in brief/3. Molecular docking/Results of molecular docking/79-2.pdb
- Data in brief/3. Molecular docking/Results of molecular docking/79-3.pdb
- Data in brief/3. Molecular docking/Results of molecular docking/80-1.pdb
- Data in brief/3. Molecular docking/Results of molecular docking/80-2.pdb
- Data in brief/3. Molecular docking/Results of molecular docking/80-3.pdb
