# Supplementary material for: A Network Pharmacology-Based Study on Irritable Bowel Syndrome Prevention and Treatment Utilizing Shenling Baizhu Powder
Source: Biomed Res Int. 2021 Nov 23;2021:4579850. doi: 10.1155/2021/4579850 (PMC8632384; doi:10.1155/2021/4579850)
Supplement: Supplementary Materials — Please find detailed data in the supplementary file, including the original data of SymMap, metabolomics, and molecular docking of Shenling Baizhu powder. “Shenling Baizhu powder SymMap” includes all herbal targets and combined targets. “Shenling Baizhu powder metabolomics” includes two-dimensional structural data analysis. “Molecular docking” involves molecule-target docking and the results. [file 4579850.f1.zip › Data in brief/1. Shenling Baizhu powder Symmap/!Combined target.xlsx]

## Sheet: Sheet1
ABAT
ACHE
ADRA1A
ADRA2A
ADRB1
ADRB2
AKR1B1
ALAS1
ALAS2
ALDH2
ALOX5
AMY2A
AR
ATP2C1
ATP5B
BCHE
BCL2
CA1
CALM3
CAT
CCNA2
CCND1
CDC25B
CDK2
CDK4
CHRM1
COL1A1
CTH
CTNNB1
CTSD
ESR1
ESR2
GATM
GLB1
GNMT
GOT1
GPT
GPT2
GRIA1
GRIA2
GRIN1
GRIN3A
GSK3B
HSD3B1
HSD3B2
IFNAR2
IGHG1
IL10
IL1B
IL4
IL6
JUN
KCNH2
MAOA
MAOB
MAP2
ME1
MMP8
MT-ND6
MYC
NCOA1
NOS2
NQO2
NR3C1
NR3C2
OPRM1
PCYT1A
PGF
PGR
PKLR
PLA2G2A
PON1
PPARG
PRSS1
PTEN
PTGS1
PTGS2
PYGL
RXRA
SCN5A
SIRT1
SLC22A5
SLC6A2
SLC6A3
SLC6A4
TNF
VEGFA
XDH
PLB1
GUSBP1
CDC2
ABCB1
ABCC2
ABCG2
ACACA
ACADM
ACE
ACPP
AHR
AKR1C3
AKT1
ALAD
AMD1
ANTXR2
APOB
ATF2
ATM
BCL2L1
BDNF
BIRC5
BMP2
CA2
CAMK4
CASP3
CASP8
CAV1
CCL2
CCL3
CCR5
CD40LG
CD86
CDKN1A
CDKN2A
CETP
CHEK2
CHUK
COL3A1
COL4A2
COL7A1
CPT1A
CREB1
CRH
CRP
CRYZ
CTSB
CXCL10
CXCL8
CXCR4
CYP17A1
CYP1A1
CYP1A2
CYP1B1
CYP2B6
CYP2E1
CYP3A4
CYP3A43
DBI
DDIT3
DLAT
DLD
DLG4
DNPEP
DRD2
DRD5
DUOX2
EDN1
EGF
EGFR
EGLN1
EIF6
ENOX2
ENPEP
EPHX1
ERBB2
ERBB3
F3
F8
FAS
FASLG
FASN
FOS
G6PD
GAPDH
GATA3
GBA2
GCH1
GFAP
GJA1
GLUL
GNAI3
GNRH1
GRIN2A
GSR
GSTA1
GSTA2
GSTM1
GSTM2
GSTP1
GUSB
HADHB
HDC
HIF1A
HMGCR
HMOX1
HRH1
HS3ST3A1
HSF1
HSPA5
HSPB1
HTR3A
ICAM1
IFNG
IGF2
IGFBP3
IL1A
IL2
IL23A
IL5
IMPA1
INS
INSR
IRF1
ISYNA1
ITGB2
KDR
LCAT
LCT
LITAF
LPL
MAPK1
MAPK10
MAPK3
MC4R
MGAM
MGST1
MME
MMP1
MMP2
MMP3
MMP9
MPO
MS4A1
MUC1
NCF1
NDUFS1
NFKBIA
NOS3
NPEPPS
NQO1
NR1I2
NR1I3
NTRK2
ODC1
OGG1
OPRD1
OPRK1
PAM
PARP1
PCSK1
PCSK2
PDE10A
PDHX
PDX1
PDYN
PFKFB4
PFKM
PGD
PLAT
PLAU
PLG
PNP
POR
PPARA
PPARD
PPARGC1A
PPP3CA
PRKCA
PRKCB
PRODH
PTGER3
RAF1
RASA1
RASSF1
RB1
RELA
REN
RENBP
RUNX2
RXRB
SELE
SELP
SERPINE1
SI
SLC2A2
SOAT1
SOD1
SOD2
SRD5A2
STAT1
SULT1A1
SULT1E1
TBXA2R
TDP1
TGFB1
TH
THBD
TNC
TOP1
TOP2A
TP53
TPO
TREH
TRPC3
TRPV1
TRPV3
TYRP1
UCP2
VCAM1
XIAP
AQP4
CCK
CCNB1
CD14
ELK1
ARRB1
CDC25A
BAK1
BAX
ADCY8
ADM
DIO1
CCR3
E2F1
E2F2
CLDN4
CASP9
RUNX1T1
SMAD1
HAS2
MDK
GAP43
HK2
GCG
GGT5
FABP1
HP
GNA12
GPLD1
CXCL2
GUCY2F
NFE2L2
SCD
PLCG1
CCL4
NKX3-1
CXCL11
NRF1
RASGRF1
RBP2
CITED1
PCOLCE
PYY
PGA5
PSMD3
TNFSF10
UCP3
SLC2A4
TEP1
TFAM
SOD3
SP1
SPP1
ARL6IP5
AHSA1
CAMKK2
DCAF5
CES2
ARC
ATMIN
HERC5
SLC17A7
CUTA
CDK12
MIOX
RETN
MOGAT2
FCAMR
PPARGC1B
ENPP7
PRXC1A
gyrB
NO66
crn-7
ADC
C8orf42
ADCY2
APP
CASP7
DDC
DRD3
MCL1
MDM2
MET
PCNA
TYR
PTGES
NUF2
ABCC1
AKR1C1
BAD
CES1
CHKB
CSF2
CYP19A1
LDLR
MTTP
SOAT2
SREBF1
UGT1A1
MAP2K4
MAPK7
ADIPOQ
ACTA2
CD40
CD80
CDH1
CDK5R1
COMT
DHCR7
EP300
FN1
GATA1
GATA2
HMBS
MAPK8
MAPT
PREP
SMAD2
NFE2
MYB
THBS1
ACTB
ALB
CD36
HNF1A
HNF4A
TRIM26
ABI1
AGT
BCL2L2
CD4
CDK6
CDKN1C
CEBPA
CYP2A6
CYP3A7
CYP7A1
DNMT3A
DNMT3B
EDNRA
EEF1A1
ELANE
EPHA2
FCER1A
FGF10
FGF2
FGFR1
FLT1
FOXO1
FYN
GCLC
GLA
HTT
IGF1R
IKBKB
MAP2K1
MAP3K1
MMP10
MMP13
MMP14
MMP7
PDGFB
PDGFRB
PRKCE
RPS6KA1
RPSA
STAT3
TBK1
TLR4
VIM
EGR1
IL6ST
IRF3
IVL
JUNB
JUND
HOXD1
FOSB
FOSL2
SAA2
RASGRF2
OLR1
MUC5AC
RPS6KB1
SREBF2
FOSL1
SLPI
TIMP1
TIMP2
MADD
RPS6KA5
EEF1E1
BCL2L10
PIM2
BBC3
AZIN1
OXSM
GDPD5
DHFRP1
GRLF1
GDE5
ABCA1
CYP2D6
FUS
PLA2G4A
PRDX5
RARA
RUNX1
SLC6A1
UCHL1
VCP
CYP4B1
AMY1C
FRAP1
Cyp2b1
MYST4
AAGAB
ADCYAP1
AGTR1
APAF1
BIRC3
BRCA1
BRCA2
CASP1
CCND2
CCR2
CD28
CD320
CDC42
CDK7
COL2A1
GSS
HGF
IRS1
ITGB1
JAK1
LGSN
NR1H3
NTRK1
PAPPA
PKD1
PRKAG2
PRKCD
PTPN1
RPS6
SPARC
SRC
TGFA
TGFB2
TNFRSF10B
CCNE1
EIF2S1
BCL2A1
BSG
C5AR1
XRCC6
MAP1B
BCAM
PMAIP1
PECAM1
PSMG1
ABCC3
KLF10
TRAF2
CCNE2
TNFRSF10A
CFLAR
BCL2L11
PYGO1
SIRT2
IL17B
ADIPOR1
CREBZF
ADIPOR2
DGAT2
CRTC2
MAC1
BMP4
CAPN1
CCL11
COL1A2
CYP11B2
GABBR1
HMGB1
HSD11B2
INPPL1
JAK2
JUP
KAT5
MAPK8IP1
MT2A
MT3
PRKCG
PRKCZ
SFTPB
SLC2A1
SLC37A4
TXN
CTNNA1
PTPN6
CCL20
MAPK8IP2
PCDH12
F11R
TRIM63
FBXO32
CASP12
GUCY1B3
