# Supplementary material for: A Network Pharmacology-Based Study on Irritable Bowel Syndrome Prevention and Treatment Utilizing Shenling Baizhu Powder
Source: Biomed Res Int. 2021 Nov 23;2021:4579850. doi: 10.1155/2021/4579850 (PMC8632384; doi:10.1155/2021/4579850)
Supplement: Supplementary Materials — Please find detailed data in the supplementary file, including the original data of SymMap, metabolomics, and molecular docking of Shenling Baizhu powder. “Shenling Baizhu powder SymMap” includes all herbal targets and combined targets. “Shenling Baizhu powder metabolomics” includes two-dimensional structural data analysis. “Molecular docking” involves molecule-target docking and the results. [file 4579850.f1.zip › Data in brief/1. Shenling Baizhu powder Symmap/Amomum villosum.csv]

Target id	Gene symbol	Chromosome	Gene name	Protein name	Ensembl id	UniProt id	P_value	FDR(BH)	FDR(Bonferroni)	Relationship
SMTT00010	ABAT	16	4-aminobutyrate Aminotransferase	4-aminobutyrate Aminotransferase, Mitochondrial	ENSG00000183044	P80404	0.00452648	0.0181758	1.0	By_ingredient
SMTT00016	ABCB1		ATP-binding cassette, sub-family B (MDR/TAP), member 1	Multidrug Resistance Protein 1		P08183	0.19472	0.222171	1.0	By_ingredient
SMTT00023	ABCC2	10	ATP Binding Cassette Subfamily C Member 2	Canalicular Multispecific Organic Anion Transporter 1	ENSG00000023839	Q92887	0.055378	0.0783089	1.0	By_ingredient
SMTT00032	ABCG2		ATP-binding cassette, sub-family G (WHITE), member 2	ATP-binding Cassette Sub-family G Member 2		Q9UNQ0	0.0660817	0.0894653	1.0	By_ingredient
SMTT00038	ACACA	17	Acetyl-CoA Carboxylase Alpha	Acetyl-CoA Carboxylase 1	ENSG00000278540	Q13085	0.055378	0.0783089	1.0	By_ingredient
SMTT00041	ACADM	1	Acyl-CoA Dehydrogenase Medium Chain	Medium-chain Specific Acyl-CoA Dehydrogenase, Mitochondrial （UniProtKB - E9PRX4）	ENSG00000117054	P11310	0.0225288	0.0422513	1.0	By_ingredient
SMTT00049	ACE	17	Angiotensin I Converting Enzyme	Angiotensin-converting Enzyme	ENSG00000159640	P12821	0.0445522	0.066817	1.0	By_ingredient
SMTT00051	ACHE		acetylcholinesterase (Yt blood group)	Acetylcholinesterase		P22303	0.073469	0.0973564	1.0	By_ingredient
SMTT00056	ACPP		acid phosphatase, prostate	Prostatic Acid Phosphatase		P15309	0.0766646	0.100671	1.0	By_ingredient
SMTT00102	ADRA1A		adrenergic, alpha-1A-, receptor	Alpha-1A Adrenergic Receptor		P35348	0.00706458	0.0226234	1.0	By_ingredient
SMTT00103	ADRA2A		adrenergic, alpha-2A-, receptor	Alpha-2A Adrenergic Receptor		P08913	0.220613	0.248728	1.0	By_ingredient
SMTT00105	ADRB1		adrenergic, beta-1-, receptor	Beta-1 Adrenergic Receptor		P08588	0.786937	0.808941	1.0	By_ingredient
SMTT00106	ADRB2		adrenergic, beta-2-, receptor, surface	Beta-2 Adrenergic Receptor		P07550	0.25921	0.288337	1.0	By_ingredient
SMTT00129	AHR		Aryl hydrocarbon receptor	Aryl Hydrocarbon Receptor		P35869	0.0138089	0.0319193	1.0	By_ingredient
SMTT00139	AKR1B1		Aldo-keto reductase family 1, member B1 (aldose reductase)	Aldose Reductase		P15121	0.0025294	0.0134993	1.0	By_ingredient
SMTT00142	AKR1C3		aldo-keto reductase family 1 member C3	Aldo-keto Reductase Family 1 Member C3		P42330	0.0766646	0.100671	1.0	By_ingredient
SMTT00144	AKT1	14	AKT Serine/threonine Kinase 1	RAC-alpha Serine/threonine-protein Kinase	ENSG00000142208	P31749	0.351662	0.382818	1.0	By_ingredient
SMTT00147	ALAD	9	Aminolevulinate Dehydratase	Delta-aminolevulinic Acid Dehydratase	ENSG00000148218	P13716	0.0871281	0.111613	1.0	By_ingredient
SMTT00148	ALAS1		5'-aminolevulinate synthase 1	5-aminolevulinate Synthase, Nonspecific, Mitochondrial		P13196	0.0445522	0.066817	1.0	By_ingredient
SMTT00149	ALAS2	X	5'-aminolevulinate Synthase 2	5-aminolevulinate Synthase, Erythroid-specific, Mitochondrial	ENSG00000158578	P22557	0.0660817	0.0894653	1.0	By_ingredient
SMTT00153	ALDH2	12	Aldehyde Dehydrogenase 2 Family Member	Aldehyde Dehydrogenase, Mitochondrial	ENSG00000111275	P05091	0.176144	0.203081	1.0	By_ingredient
SMTT00175	ALOX5		arachidonate 5-lipoxygenase	Arachidonate 5-lipoxygenase		P09917	0.000348567	0.00346996	1.0	By_ingredient
SMTT00184	AMD1		adenosylmethionine decarboxylase 1	S-adenosylmethionine Decarboxylase Proenzyme		P17707	0.0660817	0.0894653	1.0	By_ingredient
SMTT00194	AMY2A		amylase, alpha 2A(pancreatic)	Pancreatic Alpha-amylase		P04746	0.21288	0.24086	1.0	By_ingredient
SMTT00214	ANTXR2	4	Anthrax Toxin Receptor 2	Anthrax Toxin Receptor 2	ENSG00000163297	P58335	0.0113283	0.0283993	1.0	By_ingredient
SMTT00232	APOB	2	Apolipoprotein B		ENSG00000084674		0.055378	0.0783089	1.0	By_ingredient
SMTT00244	AR	X	Androgen Receptor	Androgen Receptor	ENSG00000169083	P10275	0.997697	0.998803	1.0	By_ingredient
SMTT00282	ATF2		Activating transcription factor 2	Cyclic AMP-dependent Transcription Factor ATF-2		P15336	0.0660817	0.0894653	1.0	By_ingredient
SMTT00287	ATM	11	ATM Serine/threonine Kinase	Serine-protein Kinase ATM	ENSG00000149311	Q13315	0.033603	0.0547565	1.0	By_ingredient
SMTT00295	ATP2C1	3	ATPase Secretory Pathway Ca2+ Transporting 1	Calcium-transporting ATPase Type 2C Member 1	ENSG00000017260	P98194	0.107702	0.13298	1.0	By_ingredient
SMTT00297	ATP5B		ATP synthase F1 subunit beta	ATP Synthase Subunit Beta, Mitochondrial		P06576	0.0445522	0.066817	1.0	By_ingredient
SMTT00356	BCHE		butyrylcholinesterase	Cholinesterase		P06276	0.00876839	0.0251287	1.0	By_ingredient
SMTT00361	BCL2	18	BCL2, Apoptosis Regulator	Apoptosis Regulator Bcl-2	ENSG00000171791	P10415	0.0051631	0.0192843	1.0	By_ingredient
SMTT00362	BCL2L1		BCL2 like 1	Bcl-2-like Protein 1		Q07817	0.0507333	0.0733633	1.0	By_ingredient
SMTT00369	BDNF	11	Brain Derived Neurotrophic Factor	Brain-derived Neurotrophic Factor	ENSG00000176697	P23560	0.00917815	0.0256575	1.0	By_ingredient
SMTT00380	BIRC5		Baculoviral IAP repeat containing 5	Baculoviral IAP Repeat-containing Protein 5		O15392	0.176144	0.203081	1.0	By_ingredient
SMTT00389	BMP2	20	Bone Morphogenetic Protein 2		ENSG00000125845		0.00185971	0.011116	1.0	By_ingredient
SMTT00436	CA2	8	Carbonic Anhydrase 2	Carbonic Anhydrase 2	ENSG00000104267	P00918	0.963564	0.969786	1.0	By_ingredient
SMTT00461	CALM3	19	Calmodulin 3		ENSG00000160014		0.921224	0.932323	1.0	By_ingredient
SMTT00464	CAMK4		calcium/calmodulin dependent protein kinase IV	Calcium/calmodulin-dependent Protein Kinase Type IV		Q16566	0.000380405	0.00368562	1.0	By_ingredient
SMTT00480	CASP3		Caspase 3	Caspase-3		P42574	0.00290975	0.0146132	1.0	By_ingredient
SMTT00482	CASP8	2	Caspase 8	Caspase-8	ENSG00000064012	Q14790	0.00464696	0.0183454	1.0	By_ingredient
SMTT00487	CAT	11	Catalase	Catalase	ENSG00000121691	P04040	5.26e-09	7.38e-07	0.000465	By_ingredient
SMTT00490	CAV1	7	Caveolin 1		ENSG00000105974		0.0871281	0.111613	1.0	By_ingredient
SMTT00516	CCL2		C-C motif chemokine ligand 2	C-C Motif Chemokine 2		P13500	0.00141803	0.00929643	1.0	By_ingredient
SMTT00517	CCL3		C-C motif chemokine ligand 3	C-C Motif Chemokine 3		P10147	0.033603	0.0547565	1.0	By_ingredient
SMTT00520	CCNA2		cyclin A2	Cyclin-A2		P20248	0.897476	0.910697	1.0	By_ingredient
SMTT00521	CCND1	11	Cyclin D1	G1/S-specific Cyclin-D1	ENSG00000110092	P24385	0.0135025	0.0313804	1.0	By_ingredient
SMTT00527	CCR5		C-C motif chemokine receptor 5	C-C Chemokine Receptor Type 5		P51681	0.055378	0.0783089	1.0	By_ingredient
SMTT00547	CD40LG	X	CD40 Ligand	CD40 Ligand	ENSG00000102245	P29965	0.00124913	0.00851116	1.0	By_ingredient
SMTT00554	CD86		CD86 molecule	T-lymphocyte Activation Antigen CD86		P42081	0.0766646	0.100671	1.0	By_ingredient
SMTT00558	CDC25B		cell division cycle 25B	M-phase Inducer Phosphatase 2		P30305	0.0398127	0.0615707	1.0	By_ingredient
SMTT00569	CDK2		cyclin dependent kinase 2	Cyclin-dependent Kinase 2		P24941	0.994475	0.996211	1.0	By_ingredient
SMTT00570	CDK4	12	Cyclin Dependent Kinase 4	Cyclin-dependent Kinase 4	ENSG00000135446	P11802	0.0451495	0.0673824	1.0	By_ingredient
SMTT00577	CDKN1A	6	Cyclin Dependent Kinase Inhibitor 1A	Cyclin-dependent Kinase Inhibitor 1	ENSG00000124762	P38936	0.0921418	0.116787	1.0	By_ingredient
SMTT00580	CDKN2A	9	Cyclin Dependent Kinase Inhibitor 2A		ENSG00000147889		0.0660817	0.0894653	1.0	By_ingredient
SMTT00612	CETP	16	Cholesteryl Ester Transfer Protein	Cholesteryl Ester Transfer Protein	ENSG00000087237	P11597	0.0225288	0.0422513	1.0	By_ingredient
SMTT00628	CHEK2	22	Checkpoint Kinase 2	Serine/threonine-protein Kinase Chk2	ENSG00000183765	O96017	0.033603	0.0547565	1.0	By_ingredient
SMTT00636	CHRM1		cholinergic receptor muscarinic 1	Muscarinic Acetylcholine Receptor M1		P11229	5.84e-11	1.46e-08	5.16e-06	By_ingredient
SMTT00654	CHUK	10	Conserved Helix-loop-helix Ubiquitous Kinase	Inhibitor Of Nuclear Factor Kappa-B Kinase Subunit Alpha	ENSG00000213341	O15111	0.055378	0.0783089	1.0	By_ingredient
SMTT00721	COL1A1	17	Collagen Type I Alpha 1 Chain	Collagen Alpha-1(I) Chain	ENSG00000108821	P02452	0.00917815	0.0256575	1.0	By_ingredient
SMTT00726	COL3A1	2	Collagen Type III Alpha 1 Chain	Collagen Alpha-1(III) Chain	ENSG00000168542	P02461	0.0766646	0.100671	1.0	By_ingredient
SMTT00728	COL4A2	13	Collagen Type IV Alpha 2 Chain		ENSG00000134871		0.0113283	0.0283993	1.0	By_ingredient
SMTT00739	COL7A1	3	Collagen Type VII Alpha 1 Chain		ENSG00000114270		0.0974736	0.122298	1.0	By_ingredient
SMTT00777	CPT1A	11	Carnitine Palmitoyltransferase 1A	Carnitine O-palmitoyltransferase 1, Liver Isoform	ENSG00000110090	P50416	0.0225288	0.0422513	1.0	By_ingredient
SMTT00786	CREB1	2	CAMP Responsive Element Binding Protein 1	Cyclic AMP-responsive Element-binding Protein 1	ENSG00000118260	P16220	0.00917815	0.0256575	1.0	By_ingredient
SMTT00789	CRH		corticotropin releasing hormone	Corticoliberin		P06850	0.0660817	0.0894653	1.0	By_ingredient
SMTT00793	CRP		C-reactive protein	C-reactive Protein		P02741	0.000755121	0.00593804	1.0	By_ingredient
SMTT00809	CRYZ		crystallin zeta	Quinone Oxidoreductase		Q08257	0.0113283	0.0283993	1.0	By_ingredient
SMTT00826	CTH	1	Cystathionine Gamma-lyase	Cystathionine Gamma-lyase	ENSG00000116761	P32929	0.0372412	0.0588682	1.0	By_ingredient
SMTT00830	CTNNB1	3	Catenin Beta 1	Catenin Beta-1	ENSG00000168036	P35222	0.137701	0.163622	1.0	By_ingredient
SMTT00836	CTSB		Cathepsin B	Cathepsin B		P07858	0.107702	0.13298	1.0	By_ingredient
SMTT00838	CTSD	11	Cathepsin D	Cathepsin D	ENSG00000117984	P07339	0.00123899	0.00846292	1.0	By_ingredient
SMTT00849	CXCL10		C-X-C motif chemokine ligand 10	C-X-C Motif Chemokine 10		P02778	0.0113283	0.0283993	1.0	By_ingredient
SMTT00851	CXCL8		C-X-C motif chemokine ligand 8	Interleukin-8		P10145	0.273286	0.302685	1.0	By_ingredient
SMTT00852	CXCR4	2	C-X-C Motif Chemokine Receptor 4	C-X-C Chemokine Receptor Type 4	ENSG00000121966	P61073	0.0660817	0.0894653	1.0	By_ingredient
SMTT00863	CYP17A1	10	Cytochrome P450 Family 17 Subfamily A Member 1	Steroid 17-alpha-hydroxylase/17,20 Lyase	ENSG00000148795	P05093	0.0113283	0.0283993	1.0	By_ingredient
SMTT00865	CYP1A1		cytochrome P450 family 1 subfamily A member 1	Cytochrome P450 1A1		P04798	0.000229238	0.00260602	1.0	By_ingredient
SMTT00866	CYP1A2		cytochrome P450 family 1 subfamily A member 2	Cytochrome P450 1A2		P05177	0.0010321	0.00741239	1.0	By_ingredient
SMTT00867	CYP1B1	2	Cytochrome P450 Family 1 Subfamily B Member 1	Cytochrome P450 1B1	ENSG00000138061	Q16678	0.00185971	0.011116	1.0	By_ingredient
SMTT00875	CYP2B6		cytochrome P450 family 2 subfamily B member 6	Cytochrome P450 2B6		P20813	0.107702	0.13298	1.0	By_ingredient
SMTT00880	CYP2E1		cytochrome P450 family 2 subfamily E member 1	Cytochrome P450 2E1		P05181	0.00656889	0.021641	1.0	By_ingredient
SMTT00883	CYP3A4		cytochrome P450 family 3 subfamily A member 4	Cytochrome P450 3A4		P08684	0.297741	0.327729	1.0	By_ingredient
SMTT00884	CYP3A43		cytochrome P450 family 3 subfamily A member 43	Cytochrome P450 3A43		Q9HB55	0.0113283	0.0283993	1.0	By_ingredient
SMTT00903	DBI		diazepam binding inhibitor, acyl-CoA binding protein	Acyl-CoA-binding Protein		P07108	0.0225288	0.0422513	1.0	By_ingredient
SMTT00920	DDIT3	12	DNA Damage Inducible Transcript 3		ENSG00000175197		0.055378	0.0783089	1.0	By_ingredient
SMTT00957	DLAT	11	Dihydrolipoamide S-acetyltransferase	Dihydrolipoyllysine-residue Acetyltransferase Component Of Pyruvate Dehydrogenase Complex, Mitochondrial	ENSG00000150768	P10515	0.0113283	0.0283993	1.0	By_ingredient
SMTT00959	DLD	7	Dihydrolipoamide Dehydrogenase	Dihydrolipoyl Dehydrogenase, Mitochondrial	ENSG00000091140	P09622	0.0113283	0.0283993	1.0	By_ingredient
SMTT00962	DLG4		Discs Large MAGUK Scaffold Protein 4	Disks Large Homolog 4		P78352	0.0225288	0.0422513	1.0	By_ingredient
SMTT01000	DNPEP		aspartyl aminopeptidase	Aspartyl Aminopeptidase		Q9ULA0	0.0113283	0.0283993	1.0	By_ingredient
SMTT01019	DRD2	11	Dopamine Receptor D2	D(2) Dopamine Receptor	ENSG00000149295	P14416	0.196323	0.223823	1.0	By_ingredient
SMTT01021	DRD5		Dopamine Receptor D5	D(1B) Dopamine Receptor		P21918	0.401459	0.433192	1.0	By_ingredient
SMTT01033	DUOX2	15	Dual Oxidase 2		ENSG00000140279		0.107702	0.13298	1.0	By_ingredient
SMTT01057	EDN1	6	Endothelin 1	Endothelin-1	ENSG00000078401	P05305	0.127815	0.15357	1.0	By_ingredient
SMTT01069	EGF	4	Epidermal Growth Factor	Pro-epidermal Growth Factor	ENSG00000138798	P01133	0.0871281	0.111613	1.0	By_ingredient
SMTT01070	EGFR	7	Epidermal Growth Factor Receptor	Epidermal Growth Factor Receptor	ENSG00000146648	P00533	0.230631	0.259075	1.0	By_ingredient
SMTT01071	EGLN1	1	Egl-9 Family Hypoxia Inducible Factor 1	Egl Nine Homolog 1	ENSG00000135766	Q9GZT9	0.033603	0.0547565	1.0	By_ingredient
SMTT01084	EIF6		eukaryotic translation initiation factor 6	Eukaryotic Translation Initiation Factor 6		P56537	0.0424494	0.0644087	1.0	By_ingredient
SMTT01103	ENOX2		ecto-NOX disulfide-thiol exchanger 2	Ecto-NOX Disulfide-thiol Exchanger 2		Q16206	0.0113283	0.0283993	1.0	By_ingredient
SMTT01104	ENPEP		glutamyl aminopeptidase	Glutamyl Aminopeptidase		Q07075	0.0225288	0.0422513	1.0	By_ingredient
SMTT01118	EPHX1	1	Epoxide Hydrolase 1		ENSG00000143819		0.0225288	0.0422513	1.0	By_ingredient
SMTT01124	ERBB2	17	Erb-b2 Receptor Tyrosine Kinase 2	Receptor Tyrosine-protein Kinase ErbB-2	ENSG00000141736	P04626	0.00185971	0.011116	1.0	By_ingredient
SMTT01125	ERBB3	12	Erb-b2 Receptor Tyrosine Kinase 3		ENSG00000065361		0.0113283	0.0283993	1.0	By_ingredient
SMTT01141	ESR1	6	Estrogen Receptor 1	Estrogen Receptor	ENSG00000091831	P03372	0.996502	0.997879	1.0	By_ingredient
SMTT01142	ESR2		estrogen receptor 2	Estrogen Receptor Beta		Q92731	0.983698	0.987275	1.0	By_ingredient
SMTT01170	F3		coagulation factor III, tissue factor	Tissue Factor		P13726	0.157141	0.183477	1.0	By_ingredient
SMTT01173	F8	X	Coagulation Factor VIII	Coagulation Factor VIII	ENSG00000185010	P00451	0.0113283	0.0283993	1.0	By_ingredient
SMTT01200	FAS	10	Fas Cell Surface Death Receptor		ENSG00000026103		0.033603	0.0547565	1.0	By_ingredient
SMTT01201	FASLG	1	Fas Ligand		ENSG00000117560		0.0034199	0.0158954	1.0	By_ingredient
SMTT01202	FASN		fatty acid synthase	Fatty Acid Synthase		P49327	0.0347368	0.0561148	1.0	By_ingredient
SMTT01272	FOS	14	Fos Proto-oncogene, AP-1 Transcription Factor Subunit	Proto-oncogene C-Fos	ENSG00000170345	P01100	0.0126859	0.0302818	1.0	By_ingredient
SMTT01317	G6PD	X	Glucose-6-phosphate Dehydrogenase	Glucose-6-phosphate 1-dehydrogenase	ENSG00000160211	P11413	0.0871281	0.111613	1.0	By_ingredient
SMTT01337	GAPDH		glyceraldehyde-3-phosphate dehydrogenase	Glyceraldehyde-3-phosphate Dehydrogenase		P04406	0.055378	0.0783089	1.0	By_ingredient
SMTT01342	GATA3	10	GATA Binding Protein 3		ENSG00000107485		0.0445522	0.066817	1.0	By_ingredient
SMTT01348	GATM	15	Glycine Amidinotransferase	Glycine Amidinotransferase, Mitochondrial	ENSG00000171766	P50440	0.0074504	0.0231431	1.0	By_ingredient
SMTT01350	GBA2	9	Glucosylceramidase Beta 2		ENSG00000070610		0.0113283	0.0283993	1.0	By_ingredient
SMTT01353	GCH1	14	GTP Cyclohydrolase 1	GTP Cyclohydrolase 1	ENSG00000131979	P30793	0.0225288	0.0422513	1.0	By_ingredient
SMTT01367	GFAP	17	Glial Fibrillary Acidic Protein		ENSG00000131095		0.0660817	0.0894653	1.0	By_ingredient
SMTT01380	GJA1	6	Gap Junction Protein Alpha 1	Gap Junction Alpha-1 Protein	ENSG00000152661	P17302	0.147476	0.173549	1.0	By_ingredient
SMTT01392	GLB1	3	Galactosidase Beta 1		ENSG00000170266		0.00343233	0.0159448	1.0	By_ingredient
SMTT01406	GLUL	1	Glutamate-ammonia Ligase	Glutamine Synthetase	ENSG00000135821	P15104	0.0660817	0.0894653	1.0	By_ingredient
SMTT01415	GNAI3	1	G Protein Subunit Alpha I3		ENSG00000065135		0.0113283	0.0283993	1.0	By_ingredient
SMTT01426	GNMT	6	Glycine N-methyltransferase	Glycine N-methyltransferase	ENSG00000124713	Q14749	0.0192452	0.038405	1.0	By_ingredient
SMTT01430	GNRH1	8	Gonadotropin Releasing Hormone 1		ENSG00000147437		0.0225288	0.0422513	1.0	By_ingredient
SMTT01436	GOT1		glutamic-oxaloacetic transaminase 1	Aspartate Aminotransferase, Cytoplasmic		P17174	0.0818911	0.106128	1.0	By_ingredient
SMTT01456	GPT		glutamic--pyruvic transaminase	Alanine Aminotransferase 1		P24298	0.000167476	0.00208238	1.0	By_ingredient
SMTT01457	GPT2	16	Glutamic--pyruvic Transaminase 2	Alanine Aminotransferase 2	ENSG00000166123	Q8TD30	0.0034199	0.0158954	1.0	By_ingredient
SMTT01463	GRIA1		glutamate ionotropic receptor AMPA type subunit 1	Glutamate Receptor 1		P42261	0.117816	0.143372	1.0	By_ingredient
SMTT01464	GRIA2		glutamate ionotropic receptor AMPA type subunit 2	Glutamate Receptor 2		P42262	0.00522759	0.0193552	1.0	By_ingredient
SMTT01468	GRIN1	9	Glutamate Ionotropic Receptor NMDA Type Subunit 1	Glutamate Receptor Ionotropic, NMDA 1	ENSG00000176884	Q05586	0.00121542	0.00836823	1.0	By_ingredient
SMTT01469	GRIN2A	16	Glutamate Ionotropic Receptor NMDA Type Subunit 2A	Glutamate Receptor Ionotropic, NMDA 2A	ENSG00000183454	Q12879	0.0225288	0.0422513	1.0	By_ingredient
SMTT01472	GRIN3A		glutamate ionotropic receptor NMDA type subunit 3A	Glutamate Receptor Ionotropic, NMDA 3A		Q8TCU5	0.00436428	0.0178239	1.0	By_ingredient
SMTT01483	GSK3B		glycogen synthase kinase 3 beta	Glycogen Synthase Kinase-3 Beta		P49841	0.917132	0.928574	1.0	By_ingredient
SMTT01485	GSR		glutathione-disulfide reductase	Glutathione Reductase, Mitochondrial		P00390	0.117816	0.143372	1.0	By_ingredient
SMTT01487	GSTA1		glutathione S-transferase alpha 1	Glutathione S-transferase A1		P08263	0.0871281	0.111613	1.0	By_ingredient
SMTT01488	GSTA2		glutathione S-transferase alpha 2	Glutathione S-transferase A2		P09210	0.0766646	0.100671	1.0	By_ingredient
SMTT01489	GSTM1		glutathione S-transferase mu 1	Glutathione S-transferase Mu 1		P09488	0.00656889	0.021641	1.0	By_ingredient
SMTT01490	GSTM2		glutathione S-transferase mu 2	Glutathione S-transferase Mu 2		P28161	0.055378	0.0783089	1.0	By_ingredient
SMTT01491	GSTP1		glutathione S-transferase pi 1	Glutathione S-transferase P		P09211	1.42e-05	0.000363	1.0	By_ingredient
SMTT01501	GUSB	7	Glucuronidase Beta		ENSG00000169919		0.00124913	0.00851116	1.0	By_ingredient
SMTT01513	HADHB	2	Hydroxyacyl-CoA Dehydrogenase Trifunctional Multienzyme Complex Subunit Beta		ENSG00000138029		0.055378	0.0783089	1.0	By_ingredient
SMTT01533	HDC		histidine decarboxylase	Histidine Decarboxylase		P19113	0.0445522	0.066817	1.0	By_ingredient
SMTT01550	HIF1A		hypoxia inducible factor 1 subunit alpha	Hypoxia-inducible Factor 1-alpha		Q16665	0.0254279	0.0456458	1.0	By_ingredient
SMTT01567	HMGCR		3-hydroxy-3-methylglutaryl-CoA reductase	3-hydroxy-3-methylglutaryl-coenzyme A Reductase		P04035	1.47e-05	0.000371	1.0	By_ingredient
SMTT01569	HMOX1	22	Heme Oxygenase 1	Heme Oxygenase 1	ENSG00000100292	P09601	0.0372412	0.0588682	1.0	By_ingredient
SMTT01601	HRH1		histamine receptor H1	Histamine H1 Receptor		P35367	0.137701	0.163622	1.0	By_ingredient
SMTT01603	HS3ST3A1		heparan sulfate-glucosamine 3-sulfotransferase	Heparan Sulfate Glucosamine 3-O-sulfotransferase 3A1		Q9Y663	0.0113283	0.0283993	1.0	By_ingredient
SMTT01614	HSF1		heat shock transcription factor 1	Heat Shock Factor Protein 1		Q00613	0.033603	0.0547565	1.0	By_ingredient
SMTT01618	HSPA5		heat shock protein family A (Hsp70) member 5	Endoplasmic reticulum chaperone BiP		P11021	0.0871281	0.111613	1.0	By_ingredient
SMTT01620	HSPB1	7	Heat Shock Protein Family B (small) Member 1	Heat Shock Protein Beta-1	ENSG00000106211	P04792	0.055378	0.0783089	1.0	By_ingredient
SMTT01628	HTR3A		6-hydroxytryptamine receptor 3A	5-hydroxytryptamine Receptor 3A		P46098	0.607872	0.637905	1.0	By_ingredient
SMTT01638	ICAM1		intercellular adhesion molecule 1	Intercellular Adhesion Molecule 1		P05362	0.0565501	0.0795329	1.0	By_ingredient
SMTT01652	IFNG		interferon gamma	Interferon Gamma		P01579	0.0299369	0.0508743	1.0	By_ingredient
SMTT01665	IGF2	11	Insulin Like Growth Factor 2		ENSG00000167244		0.0445522	0.066817	1.0	By_ingredient
SMTT01668	IGFBP3		insulin like growth factor binding protein 3	Insulin-like Growth Factor-binding Protein 3		P17936	0.033603	0.0547565	1.0	By_ingredient
SMTT01671	IGHG1		immunoglobulin heavy constant gamma 1	Immunoglobulin heavy constant gamma 1		P01857	5.34e-06	0.000176	0.471949	By_ingredient
SMTT01682	IL10	1	Interleukin 10	Interleukin-10	ENSG00000136634	P22301	0.00141803	0.00929643	1.0	By_ingredient
SMTT01696	IL1A		interleukin 1 alpha	Interleukin-1 Alpha		P01583	0.00258418	0.0136654	1.0	By_ingredient
SMTT01697	IL1B		interleukin 1 beta	Interleukin-1 Beta		P01584	0.000150649	0.00193579	1.0	By_ingredient
SMTT01700	IL2		interleukin 2	Interleukin-2		P60568	0.0299369	0.0508743	1.0	By_ingredient
SMTT01703	IL23A		interleukin 23 subunit alpha	Interleukin-23 Subunit Alpha		Q9NPF7	0.033603	0.0547565	1.0	By_ingredient
SMTT01710	IL4		interleukin 4	Interleukin-4		P05112	0.0398127	0.0615707	1.0	By_ingredient
SMTT01711	IL5		interleukin 5	Interleukin-5		P05113	0.00258418	0.0136654	1.0	By_ingredient
SMTT01712	IL6	7	Interleukin 6	Interleukin-6	ENSG00000136244	P05231	0.00371419	0.0164018	1.0	By_ingredient
SMTT01715	IMPA1		inositol monophosphatase 1	Inositol Monophosphatase 1		P29218	0.0113283	0.0283993	1.0	By_ingredient
SMTT01724	INS	11	Insulin	Insulin	ENSG00000254647	P01308	0.00541478	0.0195641	1.0	By_ingredient
SMTT01726	INSR	19	Insulin Receptor	Insulin Receptor	ENSG00000171105	P06213	0.0660817	0.0894653	1.0	By_ingredient
SMTT01732	IRF1	5	Interferon Regulatory Factor 1		ENSG00000125347		0.0225288	0.0422513	1.0	By_ingredient
SMTT01744	ISYNA1		inositol-3-phosphate synthase 1	Inositol-3-phosphate Synthase 1		Q9NPH2	0.055378	0.0783089	1.0	By_ingredient
SMTT01756	ITGB2	21	Integrin Subunit Beta 2	Integrin Beta-2	ENSG00000160255	P05107	0.033603	0.0547565	1.0	By_ingredient
SMTT01778	JUN		Jun proto-oncogene, AP-1 transcription factor subunit	Transcription Factor AP-1		P05412	0.00741385	0.0230522	1.0	By_ingredient
SMTT01803	KCNH2	7	Potassium Voltage-gated Channel Subfamily H Member 2	Potassium Voltage-gated Channel Subfamily H Member 2	ENSG00000055118	Q12809	0.545425	0.577149	1.0	By_ingredient
SMTT01833	KDR	4	Kinase Insert Domain Receptor	Vascular Endothelial Growth Factor Receptor 2	ENSG00000128052	P35968	0.607307	0.637351	1.0	By_ingredient
SMTT01924	LCAT	16	Lecithin-cholesterol Acyltransferase		ENSG00000213398		0.0113283	0.0283993	1.0	By_ingredient
SMTT01926	LCT	2	Lactase	Lactase-phlorizin Hydrolase	ENSG00000115850	P09848	0.000720241	0.00573519	1.0	By_ingredient
SMTT01960	LITAF	16	Lipopolysaccharide Induced TNF Factor		ENSG00000189067		0.055378	0.0783089	1.0	By_ingredient
SMTT01979	LPL	8	Lipoprotein Lipase	Lipoprotein Lipase	ENSG00000175445	P06858	1.06e-05	0.000294	0.936828	By_ingredient
SMTT02024	MAOA	X	Monoamine Oxidase A	Amine Oxidase [flavin-containing] A	ENSG00000189221	P21397	0.000380306	0.00368547	1.0	By_ingredient
SMTT02025	MAOB		monoamine oxidase B	Amine Oxidase [flavin-containing] B		P27338	0.0016406	0.0102616	1.0	By_ingredient
SMTT02027	MAP2		microtubule associated protein 2	Microtubule-associated Protein 2		P11137	5.69e-06	0.000184	0.502882	By_ingredient
SMTT02033	MAPK1	22	Mitogen-activated Protein Kinase 1	Mitogen-activated Protein Kinase 1	ENSG00000100030	P28482	9.59e-05	0.00141	1.0	By_ingredient
SMTT02034	MAPK10	4	Mitogen-activated Protein Kinase 10	Mitogen-activated Protein Kinase 10	ENSG00000109339	P53779	0.00185971	0.011116	1.0	By_ingredient
SMTT02037	MAPK3		Mitogen-activated Protein Kinase 3	Mitogen-activated Protein Kinase 3		P27361	1.7e-05	0.000413	1.0	By_ingredient
SMTT02056	MC4R	18	Melanocortin 4 Receptor		ENSG00000166603		0.0113283	0.0283993	1.0	By_ingredient
SMTT02071	ME1		Malic enzyme 1	NADP-dependent Malic Enzyme		P48163	0.0254279	0.0456458	1.0	By_ingredient
SMTT02095	MGAM		maltase-glucoamylase	Maltase-glucoamylase, Intestinal		O43451	0.000221287	0.00253579	1.0	By_ingredient
SMTT02101	MGST1		microsomal glutathione S-transferase 1	Microsomal Glutathione S-transferase 1		P10620	0.033603	0.0547565	1.0	By_ingredient
SMTT02130	MME		membrane metalloendopeptidase	Neprilysin		P08473	0.033603	0.0547565	1.0	By_ingredient
SMTT02132	MMP1	11	Matrix Metallopeptidase 1	Interstitial Collagenase	ENSG00000196611	P03956	0.239357	0.267954	1.0	By_ingredient
SMTT02137	MMP2	16	Matrix Metallopeptidase 2	72 KDa Type IV Collagenase	ENSG00000087245	P08253	0.0688307	0.0924563	1.0	By_ingredient
SMTT02140	MMP3		Matrix Metallopeptidase 3	Stromelysin-1		P08254	0.0121729	0.0295348	1.0	By_ingredient
SMTT02142	MMP8		Matrix Metallopeptidase 8	Neutrophil Collagenase		P22894	0.00274419	0.0141089	1.0	By_ingredient
SMTT02143	MMP9	20	Matrix Metallopeptidase 9	Matrix Metalloproteinase-9	ENSG00000100985	P14780	0.085267	0.109645	1.0	By_ingredient
SMTT02157	MPO	17	Myeloperoxidase	Myeloperoxidase	ENSG00000005381	P05164	0.00141803	0.00929643	1.0	By_ingredient
SMTT02167	MS4A1	11	Membrane Spanning 4-domains A1	B-lymphocyte Antigen CD20	ENSG00000156738	P11836	0.0113283	0.0283993	1.0	By_ingredient
SMTT02194	MUC1	1	Mucin 1, Cell Surface Associated		ENSG00000185499		0.0225288	0.0422513	1.0	By_ingredient
SMTT02203	MYC	8	MYC Proto-oncogene, BHLH Transcription Factor	Myc Proto-oncogene Protein	ENSG00000136997	P01106	0.0347368	0.0561148	1.0	By_ingredient
SMTT02248	NCF1	7	Neutrophil Cytosolic Factor 1	Neutrophil Cytosol Factor 1	ENSG00000158517	P14598	0.0660817	0.0894653	1.0	By_ingredient
SMTT02251	NCOA1		nuclear receptor coactivator 1	Nuclear Receptor Coactivator 1		Q15788	0.991092	0.993453	1.0	By_ingredient
SMTT02281	NDUFS1	2	NADH:ubiquinone Oxidoreductase Core Subunit S1	NADH-ubiquinone Oxidoreductase 75 KDa Subunit, Mitochondrial	ENSG00000023228	P28331	0.000755121	0.00593804	1.0	By_ingredient
SMTT02314	NFKBIA	14	NFKB Inhibitor Alpha	NF-kappa-B Inhibitor Alpha	ENSG00000100906	P25963	0.321376	0.351938	1.0	By_ingredient
SMTT02349	NOS2		nitric oxide synthase 2	Nitric Oxide Synthase, Inducible		P35228	0.507254	0.53925	1.0	By_ingredient
SMTT02350	NOS3		nitric oxide synthase 3	Nitric Oxide Synthase, Endothelial		P29474	0.00141803	0.00929643	1.0	By_ingredient
SMTT02358	NPEPPS		aminopeptidase puromycin sensitive	Puromycin-sensitive Aminopeptidase		P55786	0.033603	0.0547565	1.0	By_ingredient
SMTT02368	NQO1		NAD(P)H quinone dehydrogenase 1	NAD(P)H Dehydrogenase [quinone] 1		P15559	0.0974736	0.122298	1.0	By_ingredient
SMTT02374	NR1I2		nuclear receptor subfamily 1 group I member 2	Nuclear Receptor Subfamily 1 Group I Member 2		O75469	0.247985	0.276858	1.0	By_ingredient
SMTT02375	NR1I3		nuclear receptor subfamily 1 group I member 3	Nuclear Receptor Subfamily 1 Group I Member 3		Q14994	0.0445522	0.066817	1.0	By_ingredient
SMTT02379	NR3C1	5	Nuclear Receptor Subfamily 3 Group C Member 1	Glucocorticoid Receptor	ENSG00000113580	P04150	0.960687	0.967242	1.0	By_ingredient
SMTT02380	NR3C2	4	Nuclear Receptor Subfamily 3 Group C Member 2	Mineralocorticoid Receptor	ENSG00000151623	P08235	0.974965	0.979699	1.0	By_ingredient
SMTT02402	NTRK2	9	Neurotrophic Receptor Tyrosine Kinase 2	BDNF/NT-3 Growth Factors Receptor	ENSG00000148053	Q16620	0.0225288	0.0422513	1.0	By_ingredient
SMTT02417	ODC1		ornithine decarboxylase 1	Ornithine Decarboxylase		P11926	0.166696	0.193311	1.0	By_ingredient
SMTT02420	OGG1	3	8-oxoguanine DNA Glycosylase		ENSG00000114026		0.0225288	0.0422513	1.0	By_ingredient
SMTT02428	OPRD1		opioid receptor delta 1	Delta-type Opioid Receptor		P41143	0.778015	0.800355	1.0	By_ingredient
SMTT02429	OPRK1		opioid receptor kappa 1	Kappa-type Opioid Receptor		P41145	0.00436428	0.0178239	1.0	By_ingredient
SMTT02430	OPRM1		opioid receptor mu 1	Mu-type Opioid Receptor		P35372	0.499191	0.531324	1.0	By_ingredient
SMTT02464	PAM		peptidylglycine alpha-amidating monooxygenase	Peptidyl-glycine Alpha-amidating Monooxygenase		P19021	0.0113283	0.0283993	1.0	By_ingredient
SMTT02471	PARP1		poly(ADP-ribose) polymerase 1	Poly [ADP-ribose] Polymerase 1		P09874	0.0871281	0.111613	1.0	By_ingredient
SMTT02492	PCSK1	5	Proprotein Convertase Subtilisin/kexin Type 1	Neuroendocrine Convertase 1	ENSG00000175426	P29120	0.0113283	0.0283993	1.0	By_ingredient
SMTT02493	PCSK2		proprotein convertase subtilisin/kexin type 2	Neuroendocrine Convertase 2		P16519	0.0113283	0.0283993	1.0	By_ingredient
SMTT02495	PCYT1A	3	Phosphate Cytidylyltransferase 1, Choline, Alpha	Choline-phosphate Cytidylyltransferase A	ENSG00000161217	P49585	0.0113283	0.0283993	1.0	By_ingredient
SMTT02497	PDE10A	6	Phosphodiesterase 10A	CAMP And CAMP-inhibited CGMP 3',5'-cyclic Phosphodiesterase 10A	ENSG00000112541	Q9Y233	0.176144	0.203081	1.0	By_ingredient
SMTT02515	PDHX	11	Pyruvate Dehydrogenase Complex Component X		ENSG00000110435		0.0113283	0.0283993	1.0	By_ingredient
SMTT02519	PDX1	13	Pancreatic And Duodenal Homeobox 1		ENSG00000139515		0.0113283	0.0283993	1.0	By_ingredient
SMTT02520	PDYN	20	Prodynorphin		ENSG00000101327		0.033603	0.0547565	1.0	By_ingredient
SMTT02539	PFKFB4		6-phosphofructo-2-kinase/fructose-2,6-biphosphatase 4	6-phosphofructo-2-kinase/fructose-2,6-bisphosphatase 4		Q16877	0.033603	0.0547565	1.0	By_ingredient
SMTT02540	PFKM	12	Phosphofructokinase, Muscle		ENSG00000152556		0.0225288	0.0422513	1.0	By_ingredient
SMTT02546	PGD		phosphogluconate dehydrogenase	6-phosphogluconate Dehydrogenase, Decarboxylating		P52209	0.000127758	0.00173447	1.0	By_ingredient
SMTT02550	PGR	11	Progesterone Receptor	Progesterone Receptor	ENSG00000082175	P06401	0.00302624	0.0149119	1.0	By_ingredient
SMTT02594	PKLR	1	Pyruvate Kinase L/R	Pyruvate Kinase PKLR	ENSG00000143627	P30613	0.0121729	0.0295348	1.0	By_ingredient
SMTT02597	PLA2G2A		phospholipase A2 group IIA	Phospholipase A2, Membrane Associated		P14555	0.0871281	0.111613	1.0	By_ingredient
SMTT02603	PLAT	8	Plasminogen Activator, Tissue Type	Tissue-type Plasminogen Activator	ENSG00000104368	P00750	0.0106285	0.0275272	1.0	By_ingredient
SMTT02604	PLAU	10	Plasminogen Activator, Urokinase	Urokinase-type Plasminogen Activator	ENSG00000122861	P00749	0.00510235	0.0190975	1.0	By_ingredient
SMTT02615	PLG	6	Plasminogen	Plasminogen	ENSG00000122194	P00747	0.0445522	0.066817	1.0	By_ingredient
SMTT02636	PNP	14	Purine Nucleoside Phosphorylase	Purine Nucleoside Phosphorylase	ENSG00000198805	P00491	0.166696	0.193311	1.0	By_ingredient
SMTT02668	PON1	7	Paraoxonase 1	Serum Paraoxonase/arylesterase 1	ENSG00000005421	P27169	0.000114561	0.00161071	1.0	By_ingredient
SMTT02671	POR	7	Cytochrome P450 Oxidoreductase	NADPH--cytochrome P450 Reductase	ENSG00000127948	P16435	0.00258418	0.0136654	1.0	By_ingredient
SMTT02679	PPARA		peroxisome proliferator activated receptor alpha	Peroxisome Proliferator-activated Receptor Alpha		Q07869	1.47e-05	0.000371	1.0	By_ingredient
SMTT02680	PPARD		peroxisome proliferator activated receptor delta	Peroxisome Proliferator-activated Receptor Delta		Q03181	0.000127758	0.00173447	1.0	By_ingredient
SMTT02681	PPARG	3	Peroxisome Proliferator Activated Receptor Gamma	Peroxisome Proliferator-activated Receptor Gamma	ENSG00000132170	P37231	0.0451495	0.0673824	1.0	By_ingredient
SMTT02682	PPARGC1A	4	PPARG Coactivator 1 Alpha		ENSG00000109819		0.0225288	0.0422513	1.0	By_ingredient
SMTT02696	PPP3CA		protein phosphatase 3 catalytic subunit alpha	Serine/threonine-protein Phosphatase 2B Catalytic Subunit Alpha Isoform		Q08209	0.033603	0.0547565	1.0	By_ingredient
SMTT02717	PRKCA		protein kinase C alpha	Protein Kinase C Alpha Type		P17252	0.0974736	0.122298	1.0	By_ingredient
SMTT02718	PRKCB		protein kinase C beta	Protein Kinase C Beta Type		P05771	0.000265083	0.0028832	1.0	By_ingredient
SMTT02731	PRODH	22	Proline Dehydrogenase 1	Proline Dehydrogenase 1, Mitochondrial	ENSG00000100033	O43272	0.0113283	0.0283993	1.0	By_ingredient
SMTT02747	PRSS1	7	Serine Protease 1	Trypsin-1	ENSG00000204983	P07477	0.876711	0.89192	1.0	By_ingredient
SMTT02769	PTEN	10	Phosphatase And Tensin Homolog	Phosphatidylinositol 3,4,5-trisphosphate 3-phosphatase And Dual-specificity Protein Phosphatase PTEN	ENSG00000171862	P60484	0.0034199	0.0158954	1.0	By_ingredient
SMTT02772	PTGER3		prostaglandin E receptor 3	Prostaglandin E2 Receptor EP3 Subtype		P43115	7.7e-05	0.00122	1.0	By_ingredient
SMTT02776	PTGS1		prostaglandin-endoperoxide synthase 1	Prostaglandin G/H Synthase 1		P23219	8.5e-05	0.00131	1.0	By_ingredient
SMTT02777	PTGS2		prostaglandin-endoperoxide synthase 2	Prostaglandin G/H Synthase 2		P35354	1.58e-09	2.63e-07	0.00014	By_ingredient
SMTT02803	PYGL	14	Glycogen Phosphorylase L	Glycogen Phosphorylase, Liver Form	ENSG00000100504	P06737	0.0871281	0.111613	1.0	By_ingredient
SMTT02824	RAF1	3	Raf-1 Proto-oncogene, Serine/threonine Kinase	RAF Proto-oncogene Serine/threonine-protein Kinase	ENSG00000132155	P04049	0.0766646	0.100671	1.0	By_ingredient
SMTT02836	RASA1	5	RAS P21 Protein Activator 1		ENSG00000145715		0.0113283	0.0283993	1.0	By_ingredient
SMTT02839	RASSF1	3	Ras Association Domain Family Member 1		ENSG00000068028		0.0113283	0.0283993	1.0	By_ingredient
SMTT02842	RB1	13	RB Transcriptional Corepressor 1	Retinoblastoma-associated Protein	ENSG00000139687	P06400	0.127815	0.15357	1.0	By_ingredient
SMTT02865	RELA		RELA proto-oncogene, NF-kB subunit	Transcription Factor P65		Q04206	0.0096585	0.0263305	1.0	By_ingredient
SMTT02867	REN	1	Renin	Renin	ENSG00000143839	P00797	0.033603	0.0547565	1.0	By_ingredient
SMTT02868	RENBP		renin binding protein	N-acylglucosamine 2-epimerase		P51606	0.0113283	0.0283993	1.0	By_ingredient
SMTT02967	RUNX2	6	Runt Related Transcription Factor 2		ENSG00000124813		0.0225288	0.0422513	1.0	By_ingredient
SMTT02969	RXRA		retinoid X receptor alpha	Retinoic Acid Receptor RXR-alpha		P19793	2.26e-05	0.000509	1.0	By_ingredient
SMTT02970	RXRB		retinoid X receptor beta	Retinoic Acid Receptor RXR-beta		P28702	0.428186	0.460255	1.0	By_ingredient
SMTT03005	SCN5A	3	Sodium Voltage-gated Channel Alpha Subunit 5	Sodium Channel Protein Type 5 Subunit Alpha	ENSG00000183873	Q14524	0.789347	0.811248	1.0	By_ingredient
SMTT03028	SELE		selectin E	E-selectin		P16581	0.166696	0.193311	1.0	By_ingredient
SMTT03030	SELP		selectin P	P-selectin		P16109	0.127815	0.15357	1.0	By_ingredient
SMTT03048	SERPINE1	7	Serpin Family E Member 1	Plasminogen Activator Inhibitor 1	ENSG00000106366	P05121	0.00541478	0.0195641	1.0	By_ingredient
SMTT03085	SI	3	Sucrase-isomaltase	Sucrase-isomaltase, Intestinal	ENSG00000090402	P14410	0.000755121	0.00593804	1.0	By_ingredient
SMTT03092	SIRT1		Sirtuin 1	NAD-dependent Protein Deacetylase Sirtuin-1		Q96EB6	0.055378	0.0783089	1.0	By_ingredient
SMTT03127	SLC22A5	5	Solute Carrier Family 22 Member 5	Solute Carrier Family 22 Member 5	ENSG00000197375	O76082	0.0113283	0.0283993	1.0	By_ingredient
SMTT03155	SLC2A2	3	Solute Carrier Family 2 Member 2	Solute Carrier Family 2, Facilitated Glucose Transporter Member 2	ENSG00000163581	P11168	0.0113283	0.0283993	1.0	By_ingredient
SMTT03193	SLC6A2	16	Solute Carrier Family 6 Member 2	Sodium-dependent Noradrenaline Transporter	ENSG00000103546	P23975	4.49e-14	2e-11	3.97e-09	By_ingredient
SMTT03195	SLC6A3	5	Solute Carrier Family 6 Member 3	Sodium-dependent Dopamine Transporter	ENSG00000142319	Q01959	0.262145	0.291273	1.0	By_ingredient
SMTT03196	SLC6A4		solute carrier family 6 member 4	Sodium-dependent Serotonin Transporter		P31645	0.0637724	0.0870322	1.0	By_ingredient
SMTT03253	SOAT1		sterol O-acyltransferase 1	Sterol O-acyltransferase 1		P35610	0.033603	0.0547565	1.0	By_ingredient
SMTT03256	SOD1	21	Superoxide Dismutase 1	Superoxide Dismutase [Cu-Zn]	ENSG00000142168	P00441	9.73e-06	0.000276	0.859937	By_ingredient
SMTT03257	SOD2		superoxide dismutase 2	Superoxide Dismutase [Mn], Mitochondrial		P04179	0.117816	0.143372	1.0	By_ingredient
SMTT03302	SRD5A2	2	Steroid 5 Alpha-reductase 2	3-oxo-5-alpha-steroid 4-dehydrogenase 2	ENSG00000277893	P31213	0.000755121	0.00593804	1.0	By_ingredient
SMTT03317	STAT1	2	Signal Transducer And Activator Of Transcription 1		ENSG00000115415		0.0974736	0.122298	1.0	By_ingredient
SMTT03346	SULT1A1		sulfotransferase family 1A member 1	Sulfotransferase 1A1		P50225	0.0113283	0.0283993	1.0	By_ingredient
SMTT03347	SULT1E1		sulfotransferase family 1E member 1	Estrogen Sulfotransferase		P49888	0.055378	0.0783089	1.0	By_ingredient
SMTT03408	TBXA2R		thromboxane A2 receptor	Thromboxane A2 Receptor		P21731	0.0225288	0.0422513	1.0	By_ingredient
SMTT03420	TDP1	14	Tyrosyl-DNA Phosphodiesterase 1		ENSG00000042088		0.0660817	0.0894653	1.0	By_ingredient
SMTT03447	TGFB1	19	Transforming Growth Factor Beta 1	Transforming Growth Factor Beta-1	ENSG00000105329	P01137	0.256515	0.285544	1.0	By_ingredient
SMTT03459	TH	11	Tyrosine Hydroxylase	Tyrosine 3-monooxygenase	ENSG00000180176	P07101	0.0106285	0.0275272	1.0	By_ingredient
SMTT03461	THBD	20	Thrombomodulin	Thrombomodulin	ENSG00000178726	P07204	0.0225288	0.0422513	1.0	By_ingredient
SMTT03501	TNC	9	Tenascin C		ENSG00000041982		0.0113283	0.0283993	1.0	By_ingredient
SMTT03502	TNF		tumor necrosis factor	Tumor Necrosis Factor		P01375	0.000509082	0.00449387	1.0	By_ingredient
SMTT03526	TOP1		DNA topoisomerase I	DNA Topoisomerase 1		P11387	0.0871281	0.111613	1.0	By_ingredient
SMTT03527	TOP2A	17	DNA Topoisomerase II Alpha	DNA Topoisomerase 2-alpha	ENSG00000131747	P11388	0.033603	0.0547565	1.0	By_ingredient
SMTT03530	TP53	17	Tumor Protein P53	Cellular Tumor Antigen P53	ENSG00000141510	P04637	0.0190213	0.0381934	1.0	By_ingredient
SMTT03537	TPO	2	Thyroid Peroxidase	Thyroid Peroxidase	ENSG00000115705	P07202	0.0445522	0.066817	1.0	By_ingredient
SMTT03549	TREH	11	Trehalase		ENSG00000118094		0.0113283	0.0283993	1.0	By_ingredient
SMTT03583	TRPC3	4	Transient Receptor Potential Cation Channel Subfamily C Member 3		ENSG00000138741		0.0113283	0.0283993	1.0	By_ingredient
SMTT03590	TRPV1		transient receptor potential cation channel subfamily V member 1	Transient Receptor Potential Cation Channel Subfamily V Member 1		Q8NER1	0.0660817	0.0894653	1.0	By_ingredient
SMTT03591	TRPV3	17	Transient Receptor Potential Cation Channel Subfamily V Member 3	Transient Receptor Potential Cation Channel Subfamily V Member 3	ENSG00000167723	Q8NET8	0.0113283	0.0283993	1.0	By_ingredient
SMTT03650	TYRP1	9	Tyrosinase Related Protein 1		ENSG00000107165		0.033603	0.0547565	1.0	By_ingredient
SMTT03662	UCP2	11	Uncoupling Protein 2		ENSG00000175567		0.0445522	0.066817	1.0	By_ingredient
SMTT03701	VCAM1		vascular cell adhesion molecule 1	Vascular Cell Adhesion Protein 1		P19320	0.0424494	0.0644087	1.0	By_ingredient
SMTT03708	VEGFA		vascular endothelial growth factor A	Vascular Endothelial Growth Factor A		P15692	0.0244388	0.0444636	1.0	By_ingredient
SMTT03764	XDH	2	Xanthine Dehydrogenase	Xanthine Dehydrogenase/oxidase	ENSG00000158125	P47989	0.0135025	0.0313804	1.0	By_ingredient
SMTT03765	XIAP	X	X-linked Inhibitor Of Apoptosis	E3 Ubiquitin-protein Ligase XIAP	ENSG00000101966	P98170	0.0974736	0.122298	1.0	By_ingredient
SMTT03843	AQP4	18	Aquaporin 4		ENSG00000171885	P55087	0.0113283	0.0283993	1.0	By_ingredient
SMTT03844	CCK	3	Cholecystokinin		ENSG00000187094	P06307	0.000380405	0.00368562	1.0	By_ingredient
SMTT03845	CCNB1	5	Cyclin B1		ENSG00000134057	P14635	0.0232876	0.0431968	1.0	By_ingredient
SMTT03855	CD14	5	CD14 Molecule		ENSG00000170458	P08571	0.0660817	0.0894653	1.0	By_ingredient
SMTT03857	ELK1	X	ELK1, ETS Transcription Factor		ENSG00000126767	P19419	0.0445522	0.066817	1.0	By_ingredient
SMTT03858	ARRB1	11	Arrestin Beta 1		ENSG00000137486	P49407	0.0113283	0.0283993	1.0	By_ingredient
SMTT03862	CDC25A	3	Cell Division Cycle 25A		ENSG00000164045	P30304	0.0113283	0.0283993	1.0	By_ingredient
SMTT03875	BAK1	6	BCL2 Antagonist/killer 1		ENSG00000030110	Q16611	0.0871281	0.111613	1.0	By_ingredient
SMTT03877	BAX	19	BCL2 Associated X, Apoptosis Regulator		ENSG00000087088	Q07812	0.0063273	0.0212518	1.0	By_ingredient
SMTT03889	ADCY8	8	Adenylate Cyclase 8		ENSG00000155897	P40145	0.0113283	0.0283993	1.0	By_ingredient
SMTT03891	ADM	11	Adrenomedullin		ENSG00000148926	P35318	0.0113283	0.0283993	1.0	By_ingredient
SMTT03893	DIO1	1	Iodothyronine Deiodinase 1		ENSG00000211452	P49895	0.0660817	0.0894653	1.0	By_ingredient
SMTT03896	CCR3	3	C-C Motif Chemokine Receptor 3		ENSG00000183625	P51677	0.033603	0.0547565	1.0	By_ingredient
SMTT03908	E2F1	20	E2F Transcription Factor 1		ENSG00000101412	Q01094	0.055378	0.0783089	1.0	By_ingredient
SMTT03909	E2F2	1	E2F Transcription Factor 2		ENSG00000007968	Q14209	0.0113283	0.0283993	1.0	By_ingredient
SMTT03915	CLDN4	7	Claudin 4		ENSG00000189143	O14493	0.0113283	0.0283993	1.0	By_ingredient
SMTT03918	CASP9	1	Caspase 9		ENSG00000132906	P55211	0.0143484	0.0326227	1.0	By_ingredient
SMTT03920	RUNX1T1	8	RUNX1 Translocation Partner 1		ENSG00000079102	Q06455	0.0766646	0.100671	1.0	By_ingredient
SMTT03921	SMAD1	4	SMAD Family Member 1		ENSG00000170365	Q15797	0.0225288	0.0422513	1.0	By_ingredient
SMTT03927	HAS2	8	Hyaluronan Synthase 2		ENSG00000170961	Q92819	0.00185971	0.011116	1.0	By_ingredient
SMTT03933	MDK	11	Midkine		ENSG00000110492	P21741	0.0225288	0.0422513	1.0	By_ingredient
SMTT03934	GAP43	3	Growth Associated Protein 43		ENSG00000172020	P17677	0.055378	0.0783089	1.0	By_ingredient
SMTT03935	HK2	2	Hexokinase 2		ENSG00000159399	P52789	0.0113283	0.0283993	1.0	By_ingredient
SMTT03938	GCG	2	Glucagon		ENSG00000115263	P01275	0.033603	0.0547565	1.0	By_ingredient
SMTT03944	GGT5	22	Gamma-glutamyltransferase 5		ENSG00000099998	P36269	0.0445522	0.066817	1.0	By_ingredient
SMTT03952	FABP1	2	Fatty Acid Binding Protein 1		ENSG00000163586	P07148	0.0225288	0.0422513	1.0	By_ingredient
SMTT03955	HP	16	Haptoglobin		ENSG00000257017	P00738	0.0225288	0.0422513	1.0	By_ingredient
SMTT03957	GNA12	7	G Protein Subunit Alpha 12		ENSG00000146535	Q03113	0.0113283	0.0283993	1.0	By_ingredient
SMTT03961	GPLD1	6	Glycosylphosphatidylinositol Specific Phospholipase D1		ENSG00000112293	P80108	0.0225288	0.0422513	1.0	By_ingredient
SMTT03972	CXCL2	4	C-X-C Motif Chemokine Ligand 2		ENSG00000081041	P19875	0.0225288	0.0422513	1.0	By_ingredient
SMTT03980	GUCY2F	X	Guanylate Cyclase 2F, Retinal		ENSG00000101890	P51841	0.0225288	0.0422513	1.0	By_ingredient
SMTT03990	NFE2L2	2	Nuclear Factor, Erythroid 2 Like 2		ENSG00000116044	Q16236	0.00436428	0.0178239	1.0	By_ingredient
SMTT03993	SCD	10	Stearoyl-CoA Desaturase		ENSG00000099194	O00767	0.0113283	0.0283993	1.0	By_ingredient
SMTT03996	PLCG1	20	Phospholipase C Gamma 1		ENSG00000124181	P19174	0.033603	0.0547565	1.0	By_ingredient
SMTT03998	CCL4	17	C-C Motif Chemokine Ligand 4		ENSG00000275302	P13236	0.0225288	0.0422513	1.0	By_ingredient
SMTT04001	NKX3-1	8	NK3 Homeobox 1		ENSG00000167034	Q99801	0.0225288	0.0422513	1.0	By_ingredient
SMTT04010	CXCL11	4	C-X-C Motif Chemokine Ligand 11		ENSG00000169248	O14625	0.0113283	0.0283993	1.0	By_ingredient
SMTT04014	NRF1	7	Nuclear Respiratory Factor 1		ENSG00000106459	Q16656	0.033603	0.0547565	1.0	By_ingredient
SMTT04018	RASGRF1	15	Ras Protein Specific Guanine Nucleotide Releasing Factor 1		ENSG00000058335	Q13972	0.033603	0.0547565	1.0	By_ingredient
SMTT04023	RBP2	3	Retinol Binding Protein 2		ENSG00000114113	P50120	0.0225288	0.0422513	1.0	By_ingredient
SMTT04030	CITED1	X	Cbp/p300 Interacting Transactivator With Glu/Asp Rich Carboxy-terminal Domain 1		ENSG00000125931	Q99966	0.0113283	0.0283993	1.0	By_ingredient
SMTT04037	PCOLCE	7	Procollagen C-endopeptidase Enhancer		ENSG00000106333	Q15113	0.055378	0.0783089	1.0	By_ingredient
SMTT04047	PYY	17	Peptide YY		ENSG00000131096	P10082	0.0113283	0.0283993	1.0	By_ingredient
SMTT04054	PGA5	11	Pepsinogen 5, Group I (pepsinogen A)		ENSG00000256713	P00790	0.0113283	0.0283993	1.0	By_ingredient
SMTT04055	PSMD3	17	Proteasome 26S Subunit, Non-ATPase 3		ENSG00000108344	O43242	0.055378	0.0783089	1.0	By_ingredient
SMTT04065	TNFSF10	3	TNF Superfamily Member 10		ENSG00000121858	P50591	0.0225288	0.0422513	1.0	By_ingredient
SMTT04068	UCP3	11	Uncoupling Protein 3		ENSG00000175564	P55916	0.0225288	0.0422513	1.0	By_ingredient
SMTT04074	SLC2A4	17	Solute Carrier Family 2 Member 4		ENSG00000181856	P14672	0.147476	0.173549	1.0	By_ingredient
SMTT04076	TEP1	14	Telomerase Associated Protein 1		ENSG00000129566	Q99973	0.157141	0.183477	1.0	By_ingredient
SMTT04078	TFAM	10	Transcription Factor A, Mitochondrial		ENSG00000108064	Q00059	0.0225288	0.0422513	1.0	By_ingredient
SMTT04090	SOD3	4	Superoxide Dismutase 3		ENSG00000109610	P08294	0.00124913	0.00851116	1.0	By_ingredient
SMTT04091	SP1	12	Sp1 Transcription Factor		ENSG00000185591	P08047	0.0225288	0.0422513	1.0	By_ingredient
SMTT04094	SPP1	4	Secreted Phosphoprotein 1		ENSG00000118785	P10451	0.0660817	0.0894653	1.0	By_ingredient
SMTT04101	ARL6IP5	3	ADP Ribosylation Factor Like GTPase 6 Interacting Protein 5		ENSG00000144746	O75915	0.0113283	0.0283993	1.0	By_ingredient
SMTT04106	AHSA1	14	Activator Of HSP90 ATPase Activity 1		ENSG00000100591	O95433	0.000142543	0.00187163	1.0	By_ingredient
SMTT04111	CAMKK2	12	Calcium/calmodulin Dependent Protein Kinase Kinase 2		ENSG00000110931	Q96RR4	0.055378	0.0783089	1.0	By_ingredient
SMTT04114	DCAF5	14	DDB1 And CUL4 Associated Factor 5		ENSG00000139990	Q96JK2	0.0113283	0.0283993	1.0	By_ingredient
SMTT04120	CES2	16	Carboxylesterase 2		ENSG00000172831	O00748	0.0660817	0.0894653	1.0	By_ingredient
SMTT04147	ARC	8	Activity Regulated Cytoskeleton Associated Protein		ENSG00000198576	Q7LC44	0.0445522	0.066817	1.0	By_ingredient
SMTT04152	ATMIN	16	ATM Interactor		ENSG00000166454	O43313	0.0113283	0.0283993	1.0	By_ingredient
SMTT04177	HERC5	4	HECT And RLD Domain Containing E3 Ubiquitin Protein Ligase 5		ENSG00000138646	Q9UII4	0.0155345	0.0339576	1.0	By_ingredient
SMTT04183	SLC17A7	19	Solute Carrier Family 17 Member 7		ENSG00000104888	Q9P2U7	0.0113283	0.0283993	1.0	By_ingredient
SMTT04187	CUTA	6	CutA Divalent Cation Tolerance Homolog		ENSG00000112514	O60888	0.0225288	0.0422513	1.0	By_ingredient
SMTT04190	CDK12	17	Cyclin Dependent Kinase 12		ENSG00000167258	Q9NYV4	0.0113283	0.0283993	1.0	By_ingredient
SMTT04192	MIOX	22	Myo-inositol Oxygenase		ENSG00000100253	Q9UGB7	0.0225288	0.0422513	1.0	By_ingredient
SMTT04194	RETN	19	Resistin		ENSG00000104918	Q9HD89	0.0445522	0.066817	1.0	By_ingredient
SMTT04199	MOGAT2	11	Monoacylglycerol O-acyltransferase 2		ENSG00000166391	Q3SYC2	0.0113283	0.0283993	1.0	By_ingredient
SMTT04222	FCAMR	1	Fc Fragment Of IgA And IgM Receptor		ENSG00000162897	Q8WWV6	0.0225288	0.0422513	1.0	By_ingredient
SMTT04231	PPARGC1B	5	PPARG Coactivator 1 Beta		ENSG00000155846	Q86YN6	0.0225288	0.0422513	1.0	By_ingredient
SMTT04237	PLB1	2	Phospholipase B1		ENSG00000163803	Q6P1J6	0.0818911	0.106128	1.0	By_ingredient
SMTT04239	ENPP7	17	Ectonucleotide Pyrophosphatase/phosphodiesterase 7		ENSG00000182156	Q6UWV6	0.0225288	0.0422513	1.0	By_ingredient
SMTT04245	GUSBP1	5	Glucuronidase, Beta Pseudogene 1		ENSG00000183666	Q15486	0.033603	0.0547565	1.0	By_ingredient
SMTT04258	PRXC1A		Peroxidase C1A			P00433	0.033603	0.0547565	1.0	By_ingredient
SMTT04260	gyrB		DNA Gyrase Subunit B			P0AES6	0.0225288	0.0422513	1.0	By_ingredient
SMTT04265	NO66		Lysine-specific Demethylase NO66/ribosomal oxygenase 1			Q9H6W3	0.0225288	0.0422513	1.0	By_ingredient
SMTT04266	CDC2		Cell Division Control Protein 2 Homolog/cyclin dependent kinase 1			P06493	0.00421712	0.0174882	1.0	By_ingredient
SMTT04275	crn-7		Cell-death-related Nuclease 7			P34387	0.0113283	0.0283993	1.0	By_ingredient
SMTT04279	ADC		Arginine Decarboxylase/antizyme inhibitor 2			Q96A70	0.0113283	0.0283993	1.0	By_ingredient
SMTT04280	C8orf42		Uncharacterized Protein C8orf42/testis development related protein			Q86YL5	0.0113283	0.0283993	1.0	By_ingredient
