# Supplementary material for: A Network Pharmacology-Based Study on Irritable Bowel Syndrome Prevention and Treatment Utilizing Shenling Baizhu Powder
Source: Biomed Res Int. 2021 Nov 23;2021:4579850. doi: 10.1155/2021/4579850 (PMC8632384; doi:10.1155/2021/4579850)
Supplement: Supplementary Materials — Please find detailed data in the supplementary file, including the original data of SymMap, metabolomics, and molecular docking of Shenling Baizhu powder. “Shenling Baizhu powder SymMap” includes all herbal targets and combined targets. “Shenling Baizhu powder metabolomics” includes two-dimensional structural data analysis. “Molecular docking” involves molecule-target docking and the results. [file 4579850.f1.zip › Data in brief/1. Shenling Baizhu powder Symmap/Atractylodes macrocephala.csv]

Target id	Gene symbol	Chromosome	Gene name	Protein name	Ensembl id	UniProt id	P_value	FDR(BH)	FDR(Bonferroni)	Relationship
SMTT00010	ABAT	16	4-aminobutyrate Aminotransferase	4-aminobutyrate Aminotransferase, Mitochondrial	ENSG00000183044	P80404	1.92e-06	8.07e-05	0.16969	By_ingredient
SMTT00051	ACHE		acetylcholinesterase (Yt blood group)	Acetylcholinesterase		P22303	0.622184	0.65181	1.0	By_ingredient
SMTT00102	ADRA1A		adrenergic, alpha-1A-, receptor	Alpha-1A Adrenergic Receptor		P35348	0.0050187	0.0190184	1.0	By_ingredient
SMTT00103	ADRA2A		adrenergic, alpha-2A-, receptor	Alpha-2A Adrenergic Receptor		P08913	0.521115	0.553127	1.0	By_ingredient
SMTT00105	ADRB1		adrenergic, beta-1-, receptor	Beta-1 Adrenergic Receptor		P08588	0.389088	0.420705	1.0	By_ingredient
SMTT00106	ADRB2		adrenergic, beta-2-, receptor, surface	Beta-2 Adrenergic Receptor		P07550	0.133514	0.159368	1.0	By_ingredient
SMTT00139	AKR1B1		Aldo-keto reductase family 1, member B1 (aldose reductase)	Aldose Reductase		P15121	0.00015703	0.00199001	1.0	By_ingredient
SMTT00148	ALAS1		5'-aminolevulinate synthase 1	5-aminolevulinate Synthase, Nonspecific, Mitochondrial		P13196	0.0242713	0.0442718	1.0	By_ingredient
SMTT00149	ALAS2	X	5'-aminolevulinate Synthase 2	5-aminolevulinate Synthase, Erythroid-specific, Mitochondrial	ENSG00000158578	P22557	0.036187	0.057617	1.0	By_ingredient
SMTT00153	ALDH2	12	Aldehyde Dehydrogenase 2 Family Member	Aldehyde Dehydrogenase, Mitochondrial	ENSG00000111275	P05091	0.0991895	0.12411	1.0	By_ingredient
SMTT00175	ALOX5		arachidonate 5-lipoxygenase	Arachidonate 5-lipoxygenase		P09917	0.1684	0.195061	1.0	By_ingredient
SMTT00194	AMY2A		amylase, alpha 2A(pancreatic)	Pancreatic Alpha-amylase		P04746	0.121072	0.146643	1.0	By_ingredient
SMTT00244	AR	X	Androgen Receptor	Androgen Receptor	ENSG00000169083	P10275	0.0919068	0.116574	1.0	By_ingredient
SMTT00295	ATP2C1	3	ATPase Secretory Pathway Ca2+ Transporting 1	Calcium-transporting ATPase Type 2C Member 1	ENSG00000017260	P98194	0.00162043	0.0101779	1.0	By_ingredient
SMTT00297	ATP5B		ATP synthase F1 subunit beta	ATP Synthase Subunit Beta, Mitochondrial		P06576	0.0242713	0.0442718	1.0	By_ingredient
SMTT00356	BCHE		butyrylcholinesterase	Cholinesterase		P06276	0.0009935	0.00720426	1.0	By_ingredient
SMTT00361	BCL2	18	BCL2, Apoptosis Regulator	Apoptosis Regulator Bcl-2	ENSG00000171791	P10415	0.121188	0.146737	1.0	By_ingredient
SMTT00434	CA1		carbonic anhydrase 1	Carbonic Anhydrase 1		P00915	0.110198	0.135505	1.0	By_ingredient
SMTT00461	CALM3	19	Calmodulin 3		ENSG00000160014		0.895686	0.909079	1.0	By_ingredient
SMTT00487	CAT	11	Catalase	Catalase	ENSG00000121691	P04040	0.0390167	0.0607662	1.0	By_ingredient
SMTT00520	CCNA2		cyclin A2	Cyclin-A2		P20248	0.876057	0.891295	1.0	By_ingredient
SMTT00521	CCND1	11	Cyclin D1	G1/S-specific Cyclin-D1	ENSG00000110092	P24385	0.237044	0.265623	1.0	By_ingredient
SMTT00558	CDC25B		cell division cycle 25B	M-phase Inducer Phosphatase 2		P30305	0.000655952	0.00535152	1.0	By_ingredient
SMTT00569	CDK2		cyclin dependent kinase 2	Cyclin-dependent Kinase 2		P24941	0.939344	0.948482	1.0	By_ingredient
SMTT00570	CDK4	12	Cyclin Dependent Kinase 4	Cyclin-dependent Kinase 4	ENSG00000135446	P11802	0.1684	0.195061	1.0	By_ingredient
SMTT00636	CHRM1		cholinergic receptor muscarinic 1	Muscarinic Acetylcholine Receptor M1		P11229	7.53e-05	0.0012	1.0	By_ingredient
SMTT00721	COL1A1	17	Collagen Type I Alpha 1 Chain	Collagen Alpha-1(I) Chain	ENSG00000108821	P02452	0.0767667	0.100731	1.0	By_ingredient
SMTT00826	CTH	1	Cystathionine Gamma-lyase	Cystathionine Gamma-lyase	ENSG00000116761	P32929	2.1e-05	0.000481	1.0	By_ingredient
SMTT00830	CTNNB1	3	Catenin Beta 1	Catenin Beta-1	ENSG00000168036	P35222	0.0767667	0.100731	1.0	By_ingredient
SMTT00838	CTSD	11	Cathepsin D	Cathepsin D	ENSG00000117984	P07339	2.4e-07	1.63e-05	0.0212	By_ingredient
SMTT01141	ESR1	6	Estrogen Receptor 1	Estrogen Receptor	ENSG00000091831	P03372	0.994841	0.996533	1.0	By_ingredient
SMTT01142	ESR2		estrogen receptor 2	Estrogen Receptor Beta		Q92731	0.891309	0.905146	1.0	By_ingredient
SMTT01348	GATM	15	Glycine Amidinotransferase	Glycine Amidinotransferase, Mitochondrial	ENSG00000171766	P50440	4.25e-06	0.000147	0.375615	By_ingredient
SMTT01392	GLB1	3	Galactosidase Beta 1		ENSG00000170266		0.01181	0.0289894	1.0	By_ingredient
SMTT01426	GNMT	6	Glycine N-methyltransferase	Glycine N-methyltransferase	ENSG00000124713	Q14749	0.110198	0.135505	1.0	By_ingredient
SMTT01436	GOT1		glutamic-oxaloacetic transaminase 1	Aspartate Aminotransferase, Cytoplasmic		P17174	2.04e-07	1.45e-05	0.018	By_ingredient
SMTT01456	GPT		glutamic--pyruvic transaminase	Alanine Aminotransferase 1		P24298	0.000178869	0.0021914	1.0	By_ingredient
SMTT01457	GPT2	16	Glutamic--pyruvic Transaminase 2	Alanine Aminotransferase 2	ENSG00000166123	Q8TD30	0.0479583	0.070304	1.0	By_ingredient
SMTT01463	GRIA1		glutamate ionotropic receptor AMPA type subunit 1	Glutamate Receptor 1		P42261	0.0019726	0.0115855	1.0	By_ingredient
SMTT01464	GRIA2		glutamate ionotropic receptor AMPA type subunit 2	Glutamate Receptor 2		P42262	0.00810845	0.0239993	1.0	By_ingredient
SMTT01468	GRIN1	9	Glutamate Ionotropic Receptor NMDA Type Subunit 1	Glutamate Receptor Ionotropic, NMDA 1	ENSG00000176884	Q05586	0.000201978	0.00238456	1.0	By_ingredient
SMTT01472	GRIN3A		glutamate ionotropic receptor NMDA type subunit 3A	Glutamate Receptor Ionotropic, NMDA 3A		Q8TCU5	0.00130155	0.00875694	1.0	By_ingredient
SMTT01483	GSK3B		glycogen synthase kinase 3 beta	Glycogen Synthase Kinase-3 Beta		P49841	0.892661	0.906404	1.0	By_ingredient
SMTT01611	HSD3B1		dehydrogenase, 3 beta- and steroid delta-isomerase 1	3 Beta-hydroxysteroid Dehydrogenase/Delta 5-->4-isomerase Type 1		P14060	0.0122096	0.0295348	1.0	By_ingredient
SMTT01612	HSD3B2	1	Hydroxy-delta-5-steroid Dehydrogenase, 3 Beta- And Steroid Delta-isomerase 2	3 Beta-hydroxysteroid Dehydrogenase/Delta 5-->4-isomerase Type 2	ENSG00000203859	P26439	0.0302473	0.0511217	1.0	By_ingredient
SMTT01650	IFNAR2		interferon alpha and beta receptor subunit 2	Interferon Alpha/beta Receptor 2		P48551	0.00612339	0.0208847	1.0	By_ingredient
SMTT01671	IGHG1		immunoglobulin heavy constant gamma 1	Immunoglobulin heavy constant gamma 1		P01857	0.526763	0.558726	1.0	By_ingredient
SMTT01682	IL10	1	Interleukin 10	Interleukin-10	ENSG00000136634	P22301	0.115651	0.141164	1.0	By_ingredient
SMTT01697	IL1B		interleukin 1 beta	Interleukin-1 Beta		P01584	0.0310192	0.0519622	1.0	By_ingredient
SMTT01710	IL4		interleukin 4	Interleukin-4		P05112	0.158106	0.184482	1.0	By_ingredient
SMTT01712	IL6	7	Interleukin 6	Interleukin-6	ENSG00000136244	P05231	0.0462104	0.0685258	1.0	By_ingredient
SMTT01778	JUN		Jun proto-oncogene, AP-1 transcription factor subunit	Transcription Factor AP-1		P05412	0.065224	0.088562	1.0	By_ingredient
SMTT01803	KCNH2	7	Potassium Voltage-gated Channel Subfamily H Member 2	Potassium Voltage-gated Channel Subfamily H Member 2	ENSG00000055118	Q12809	0.496692	0.528849	1.0	By_ingredient
SMTT02024	MAOA	X	Monoamine Oxidase A	Amine Oxidase [flavin-containing] A	ENSG00000189221	P21397	0.11649	0.141994	1.0	By_ingredient
SMTT02025	MAOB		monoamine oxidase B	Amine Oxidase [flavin-containing] B		P27338	0.0216474	0.0412194	1.0	By_ingredient
SMTT02027	MAP2		microtubule associated protein 2	Microtubule-associated Protein 2		P11137	0.0242713	0.0442718	1.0	By_ingredient
SMTT02071	ME1		Malic enzyme 1	NADP-dependent Malic Enzyme		P48163	0.000316722	0.00325411	1.0	By_ingredient
SMTT02142	MMP8		Matrix Metallopeptidase 8	Neutrophil Collagenase		P22894	0.0101746	0.0269322	1.0	By_ingredient
SMTT02180	MT-ND6		mitochondrially encoded NADH:ubiquinone oxidoreductase core subunit 6	NADH-ubiquinone Oxidoreductase Chain 6		P03923	0.0122096	0.0295348	1.0	By_ingredient
SMTT02203	MYC	8	MYC Proto-oncogene, BHLH Transcription Factor	Myc Proto-oncogene Protein	ENSG00000136997	P01106	0.147686	0.173757	1.0	By_ingredient
SMTT02251	NCOA1		nuclear receptor coactivator 1	Nuclear Receptor Coactivator 1		Q15788	0.46067	0.492846	1.0	By_ingredient
SMTT02349	NOS2		nitric oxide synthase 2	Nitric Oxide Synthase, Inducible		P35228	0.602389	0.632534	1.0	By_ingredient
SMTT02369	NQO2		N-ribosyldihydronicotinamide:quinone reductase 2	Ribosyldihydronicotinamide Dehydrogenase [quinone]		P16083	0.193591	0.221034	1.0	By_ingredient
SMTT02379	NR3C1	5	Nuclear Receptor Subfamily 3 Group C Member 1	Glucocorticoid Receptor	ENSG00000113580	P04150	0.249097	0.277945	1.0	By_ingredient
SMTT02380	NR3C2	4	Nuclear Receptor Subfamily 3 Group C Member 2	Mineralocorticoid Receptor	ENSG00000151623	P08235	0.58761	0.618308	1.0	By_ingredient
SMTT02430	OPRM1		opioid receptor mu 1	Mu-type Opioid Receptor		P35372	0.136807	0.162703	1.0	By_ingredient
SMTT02495	PCYT1A	3	Phosphate Cytidylyltransferase 1, Choline, Alpha	Choline-phosphate Cytidylyltransferase A	ENSG00000161217	P49585	0.00612339	0.0208847	1.0	By_ingredient
SMTT02547	PGF		placental growth factor	Placenta Growth Factor		P49763	0.0122096	0.0295348	1.0	By_ingredient
SMTT02550	PGR	11	Progesterone Receptor	Progesterone Receptor	ENSG00000082175	P06401	0.0732159	0.0971055	1.0	By_ingredient
SMTT02594	PKLR	1	Pyruvate Kinase L/R	Pyruvate Kinase PKLR	ENSG00000143627	P30613	0.00370606	0.0163746	1.0	By_ingredient
SMTT02597	PLA2G2A		phospholipase A2 group IIA	Phospholipase A2, Membrane Associated		P14555	0.0479583	0.070304	1.0	By_ingredient
SMTT02668	PON1	7	Paraoxonase 1	Serum Paraoxonase/arylesterase 1	ENSG00000005421	P27169	0.0537904	0.0765798	1.0	By_ingredient
SMTT02681	PPARG	3	Peroxisome Proliferator Activated Receptor Gamma	Peroxisome Proliferator-activated Receptor Gamma	ENSG00000132170	P37231	0.1684	0.195061	1.0	By_ingredient
SMTT02747	PRSS1	7	Serine Protease 1	Trypsin-1	ENSG00000204983	P07477	0.953575	0.961036	1.0	By_ingredient
SMTT02769	PTEN	10	Phosphatase And Tensin Homolog	Phosphatidylinositol 3,4,5-trisphosphate 3-phosphatase And Dual-specificity Protein Phosphatase PTEN	ENSG00000171862	P60484	0.0479583	0.070304	1.0	By_ingredient
SMTT02776	PTGS1		prostaglandin-endoperoxide synthase 1	Prostaglandin G/H Synthase 1		P23219	0.0297372	0.0507341	1.0	By_ingredient
SMTT02777	PTGS2		prostaglandin-endoperoxide synthase 2	Prostaglandin G/H Synthase 2		P35354	0.00168797	0.010477	1.0	By_ingredient
SMTT02803	PYGL	14	Glycogen Phosphorylase L	Glycogen Phosphorylase, Liver Form	ENSG00000100504	P06737	0.0479583	0.070304	1.0	By_ingredient
SMTT02969	RXRA		retinoid X receptor alpha	Retinoic Acid Receptor RXR-alpha		P19793	0.192467	0.219915	1.0	By_ingredient
SMTT03005	SCN5A	3	Sodium Voltage-gated Channel Alpha Subunit 5	Sodium Channel Protein Type 5 Subunit Alpha	ENSG00000183873	Q14524	0.657051	0.685647	1.0	By_ingredient
SMTT03092	SIRT1		Sirtuin 1	NAD-dependent Protein Deacetylase Sirtuin-1		Q96EB6	0.0302473	0.0511217	1.0	By_ingredient
SMTT03127	SLC22A5	5	Solute Carrier Family 22 Member 5	Solute Carrier Family 22 Member 5	ENSG00000197375	O76082	0.00612339	0.0208847	1.0	By_ingredient
SMTT03193	SLC6A2	16	Solute Carrier Family 6 Member 2	Sodium-dependent Noradrenaline Transporter	ENSG00000103546	P23975	1.59e-05	0.000393	1.0	By_ingredient
SMTT03195	SLC6A3	5	Solute Carrier Family 6 Member 3	Sodium-dependent Dopamine Transporter	ENSG00000142319	Q01959	0.083278	0.107607	1.0	By_ingredient
SMTT03196	SLC6A4		solute carrier family 6 member 4	Sodium-dependent Serotonin Transporter		P31645	0.133422	0.159269	1.0	By_ingredient
SMTT03502	TNF		tumor necrosis factor	Tumor Necrosis Factor		P01375	0.00693791	0.0224754	1.0	By_ingredient
SMTT03708	VEGFA		vascular endothelial growth factor A	Vascular Endothelial Growth Factor A		P15692	0.287011	0.316779	1.0	By_ingredient
SMTT03764	XDH	2	Xanthine Dehydrogenase	Xanthine Dehydrogenase/oxidase	ENSG00000158125	P47989	0.00246961	0.0132942	1.0	By_ingredient
SMTT04237	PLB1	2	Phospholipase B1		ENSG00000163803	Q6P1J6	0.227593	0.255912	1.0	By_ingredient
SMTT04245	GUSBP1	5	Glucuronidase, Beta Pseudogene 1		ENSG00000183666	Q15486	0.0182588	0.037149	1.0	By_ingredient
SMTT04266	CDC2		Cell Division Control Protein 2 Homolog/cyclin dependent kinase 1			P06493	0.163268	0.189794	1.0	By_ingredient
