# Supplementary material for: A Network Pharmacology-Based Study on Irritable Bowel Syndrome Prevention and Treatment Utilizing Shenling Baizhu Powder
Source: Biomed Res Int. 2021 Nov 23;2021:4579850. doi: 10.1155/2021/4579850 (PMC8632384; doi:10.1155/2021/4579850)
Supplement: Supplementary Materials — Please find detailed data in the supplementary file, including the original data of SymMap, metabolomics, and molecular docking of Shenling Baizhu powder. “Shenling Baizhu powder SymMap” includes all herbal targets and combined targets. “Shenling Baizhu powder metabolomics” includes two-dimensional structural data analysis. “Molecular docking” involves molecule-target docking and the results. [file 4579850.f1.zip › Data in brief/1. Shenling Baizhu powder Symmap/Coix seed.csv]

Target id	Gene symbol	Chromosome	Gene name	Protein name	Ensembl id	UniProt id	P_value	FDR(BH)	FDR(Bonferroni)	Relationship
SMTT00062	ACTB	7	Actin Beta	Actin, Cytoplasmic 1	ENSG00000075624	P60709	0.00387448	0.0167014	1.0	By_ingredient
SMTT00103	ADRA2A		adrenergic, alpha-2A-, receptor	Alpha-2A Adrenergic Receptor		P08913	0.426074	0.458124	1.0	By_ingredient
SMTT00106	ADRB2		adrenergic, beta-2-, receptor, surface	Beta-2 Adrenergic Receptor		P07550	0.88752	0.901691	1.0	By_ingredient
SMTT00150	ALB	4	Albumin	Serum Albumin	ENSG00000163631	P02768	0.00580624	0.0204115	1.0	By_ingredient
SMTT00214	ANTXR2	4	Anthrax Toxin Receptor 2	Anthrax Toxin Receptor 2	ENSG00000163297	P58335	0.00193907	0.0114304	1.0	By_ingredient
SMTT00244	AR	X	Androgen Receptor	Androgen Receptor	ENSG00000169083	P10275	0.515198	0.547202	1.0	By_ingredient
SMTT00356	BCHE		butyrylcholinesterase	Cholinesterase		P06276	0.392366	0.424021	1.0	By_ingredient
SMTT00361	BCL2	18	BCL2, Apoptosis Regulator	Apoptosis Regulator Bcl-2	ENSG00000171791	P10415	0.0154805	0.0339576	1.0	By_ingredient
SMTT00369	BDNF	11	Brain Derived Neurotrophic Factor	Brain-derived Neurotrophic Factor	ENSG00000176697	P23560	0.0249243	0.0450476	1.0	By_ingredient
SMTT00461	CALM3	19	Calmodulin 3		ENSG00000160014		0.813353	0.833411	1.0	By_ingredient
SMTT00480	CASP3		Caspase 3	Caspase-3		P42574	0.214502	0.242469	1.0	By_ingredient
SMTT00482	CASP8	2	Caspase 8	Caspase-8	ENSG00000064012	Q14790	0.0566065	0.0795675	1.0	By_ingredient
SMTT00487	CAT	11	Catalase	Catalase	ENSG00000121691	P04040	0.0943617	0.119055	1.0	By_ingredient
SMTT00521	CCND1	11	Cyclin D1	G1/S-specific Cyclin-D1	ENSG00000110092	P24385	0.0819431	0.10618	1.0	By_ingredient
SMTT00541	CD36	7	CD36 Molecule		ENSG00000135218		0.0115797	0.0287235	1.0	By_ingredient
SMTT00570	CDK4	12	Cyclin Dependent Kinase 4	Cyclin-dependent Kinase 4	ENSG00000135446	P11802	0.0566065	0.0795675	1.0	By_ingredient
SMTT00612	CETP	16	Cholesteryl Ester Transfer Protein	Cholesteryl Ester Transfer Protein	ENSG00000087237	P11597	0.00387448	0.0167014	1.0	By_ingredient
SMTT00636	CHRM1		cholinergic receptor muscarinic 1	Muscarinic Acetylcholine Receptor M1		P11229	0.664706	0.693045	1.0	By_ingredient
SMTT00721	COL1A1	17	Collagen Type I Alpha 1 Chain	Collagen Alpha-1(I) Chain	ENSG00000108821	P02452	0.0249243	0.0450476	1.0	By_ingredient
SMTT00793	CRP		C-reactive protein	C-reactive Protein		P02741	0.00773435	0.0235781	1.0	By_ingredient
SMTT00838	CTSD	11	Cathepsin D	Cathepsin D	ENSG00000117984	P07339	0.0313181	0.0522421	1.0	By_ingredient
SMTT00851	CXCL8		C-X-C motif chemokine ligand 8	Interleukin-8		P10145	0.0529319	0.0757161	1.0	By_ingredient
SMTT00940	DHCR7	11	7-dehydrocholesterol Reductase	7-dehydrocholesterol Reductase	ENSG00000172893	Q9UBM7	0.00193907	0.0114304	1.0	By_ingredient
SMTT01000	DNPEP		aspartyl aminopeptidase	Aspartyl Aminopeptidase		Q9ULA0	0.00193907	0.0114304	1.0	By_ingredient
SMTT01057	EDN1	6	Endothelin 1	Endothelin-1	ENSG00000078401	P05305	0.0230287	0.0428673	1.0	By_ingredient
SMTT01104	ENPEP		glutamyl aminopeptidase	Glutamyl Aminopeptidase		Q07075	0.00387448	0.0167014	1.0	By_ingredient
SMTT01108	EP300	22	E1A Binding Protein P300		ENSG00000100393		0.00580624	0.0204115	1.0	By_ingredient
SMTT01124	ERBB2	17	Erb-b2 Receptor Tyrosine Kinase 2	Receptor Tyrosine-protein Kinase ErbB-2	ENSG00000141736	P04626	0.0115797	0.0287235	1.0	By_ingredient
SMTT01141	ESR1	6	Estrogen Receptor 1	Estrogen Receptor	ENSG00000091831	P03372	0.810685	0.830869	1.0	By_ingredient
SMTT01170	F3		coagulation factor III, tissue factor	Tissue Factor		P13726	0.0287047	0.0495009	1.0	By_ingredient
SMTT01483	GSK3B		glycogen synthase kinase 3 beta	Glycogen Synthase Kinase-3 Beta		P49841	0.506005	0.537993	1.0	By_ingredient
SMTT01567	HMGCR		3-hydroxy-3-methylglutaryl-CoA reductase	3-hydroxy-3-methylglutaryl-coenzyme A Reductase		P04035	0.0268163	0.0472521	1.0	By_ingredient
SMTT01571	HNF1A	12	HNF1 Homeobox A	Hepatocyte Nuclear Factor 1-alpha	ENSG00000135100	P20823	0.00387448	0.0167014	1.0	By_ingredient
SMTT01573	HNF4A	20	Hepatocyte Nuclear Factor 4 Alpha	Hepatocyte Nuclear Factor 4-alpha	ENSG00000101076	P41235	0.00580624	0.0204115	1.0	By_ingredient
SMTT01671	IGHG1		immunoglobulin heavy constant gamma 1	Immunoglobulin heavy constant gamma 1		P01857	0.000219812	0.00253312	1.0	By_ingredient
SMTT01682	IL10	1	Interleukin 10	Interleukin-10	ENSG00000136634	P22301	0.0380934	0.0598496	1.0	By_ingredient
SMTT01724	INS	11	Insulin	Insulin	ENSG00000254647	P01308	0.0192268	0.038405	1.0	By_ingredient
SMTT01744	ISYNA1		inositol-3-phosphate synthase 1	Inositol-3-phosphate Synthase 1		Q9NPH2	3.65e-05	0.00072	1.0	By_ingredient
SMTT01778	JUN		Jun proto-oncogene, AP-1 transcription factor subunit	Transcription Factor AP-1		P05412	0.000309014	0.00320419	1.0	By_ingredient
SMTT01803	KCNH2	7	Potassium Voltage-gated Channel Subfamily H Member 2	Potassium Voltage-gated Channel Subfamily H Member 2	ENSG00000055118	Q12809	0.572519	0.603543	1.0	By_ingredient
SMTT01924	LCAT	16	Lecithin-cholesterol Acyltransferase		ENSG00000213398		0.00193907	0.0114304	1.0	By_ingredient
SMTT01979	LPL	8	Lipoprotein Lipase	Lipoprotein Lipase	ENSG00000175445	P06858	0.0249243	0.0450476	1.0	By_ingredient
SMTT02024	MAOA	X	Monoamine Oxidase A	Amine Oxidase [flavin-containing] A	ENSG00000189221	P21397	0.315053	0.345502	1.0	By_ingredient
SMTT02025	MAOB		monoamine oxidase B	Amine Oxidase [flavin-containing] B		P27338	0.373405	0.404822	1.0	By_ingredient
SMTT02027	MAP2		microtubule associated protein 2	Microtubule-associated Protein 2		P11137	0.00773435	0.0235781	1.0	By_ingredient
SMTT02033	MAPK1	22	Mitogen-activated Protein Kinase 1	Mitogen-activated Protein Kinase 1	ENSG00000100030	P28482	0.0765703	0.100587	1.0	By_ingredient
SMTT02034	MAPK10	4	Mitogen-activated Protein Kinase 10	Mitogen-activated Protein Kinase 10	ENSG00000109339	P53779	0.0115797	0.0287235	1.0	By_ingredient
SMTT02037	MAPK3		Mitogen-activated Protein Kinase 3	Mitogen-activated Protein Kinase 3		P27361	0.0547709	0.0777128	1.0	By_ingredient
SMTT02143	MMP9	20	Matrix Metallopeptidase 9	Matrix Metalloproteinase-9	ENSG00000100985	P14780	0.0801556	0.104223	1.0	By_ingredient
SMTT02157	MPO	17	Myeloperoxidase	Myeloperoxidase	ENSG00000005381	P05164	0.0380934	0.0598496	1.0	By_ingredient
SMTT02203	MYC	8	MYC Proto-oncogene, BHLH Transcription Factor	Myc Proto-oncogene Protein	ENSG00000136997	P01106	0.00115546	0.0080656	1.0	By_ingredient
SMTT02251	NCOA1		nuclear receptor coactivator 1	Nuclear Receptor Coactivator 1		Q15788	0.552564	0.584256	1.0	By_ingredient
SMTT02349	NOS2		nitric oxide synthase 2	Nitric Oxide Synthase, Inducible		P35228	0.381812	0.413288	1.0	By_ingredient
SMTT02379	NR3C1	5	Nuclear Receptor Subfamily 3 Group C Member 1	Glucocorticoid Receptor	ENSG00000113580	P04150	0.423809	0.455793	1.0	By_ingredient
SMTT02380	NR3C2	4	Nuclear Receptor Subfamily 3 Group C Member 2	Mineralocorticoid Receptor	ENSG00000151623	P08235	0.0240711	0.044093	1.0	By_ingredient
SMTT02402	NTRK2	9	Neurotrophic Receptor Tyrosine Kinase 2	BDNF/NT-3 Growth Factors Receptor	ENSG00000148053	Q16620	0.00387448	0.0167014	1.0	By_ingredient
SMTT02430	OPRM1		opioid receptor mu 1	Mu-type Opioid Receptor		P35372	0.468547	0.50074	1.0	By_ingredient
SMTT02464	PAM		peptidylglycine alpha-amidating monooxygenase	Peptidyl-glycine Alpha-amidating Monooxygenase		P19021	0.00193907	0.0114304	1.0	By_ingredient
SMTT02490	PCNA	20	Proliferating Cell Nuclear Antigen	Proliferating Cell Nuclear Antigen	ENSG00000132646	P12004	0.0154104	0.0339177	1.0	By_ingredient
SMTT02495	PCYT1A	3	Phosphate Cytidylyltransferase 1, Choline, Alpha	Choline-phosphate Cytidylyltransferase A	ENSG00000161217	P49585	0.00193907	0.0114304	1.0	By_ingredient
SMTT02519	PDX1	13	Pancreatic And Duodenal Homeobox 1		ENSG00000139515		0.00193907	0.0114304	1.0	By_ingredient
SMTT02550	PGR	11	Progesterone Receptor	Progesterone Receptor	ENSG00000082175	P06401	0.000652225	0.00533342	1.0	By_ingredient
SMTT02604	PLAU	10	Plasminogen Activator, Urokinase	Urokinase-type Plasminogen Activator	ENSG00000122861	P00749	0.0584386	0.0815397	1.0	By_ingredient
SMTT02615	PLG	6	Plasminogen	Plasminogen	ENSG00000122194	P00747	0.00773435	0.0235781	1.0	By_ingredient
SMTT02668	PON1	7	Paraoxonase 1	Serum Paraoxonase/arylesterase 1	ENSG00000005421	P27169	0.000130679	0.0017579	1.0	By_ingredient
SMTT02679	PPARA		peroxisome proliferator activated receptor alpha	Peroxisome Proliferator-activated Receptor Alpha		Q07869	0.000328312	0.00333635	1.0	By_ingredient
SMTT02680	PPARD		peroxisome proliferator activated receptor delta	Peroxisome Proliferator-activated Receptor Delta		Q03181	0.00387448	0.0167014	1.0	By_ingredient
SMTT02681	PPARG	3	Peroxisome Proliferator Activated Receptor Gamma	Peroxisome Proliferator-activated Receptor Gamma	ENSG00000132170	P37231	0.0566065	0.0795675	1.0	By_ingredient
SMTT02717	PRKCA		protein kinase C alpha	Protein Kinase C Alpha Type		P17252	0.0173204	0.0361741	1.0	By_ingredient
SMTT02747	PRSS1	7	Serine Protease 1	Trypsin-1	ENSG00000204983	P07477	0.446645	0.478827	1.0	By_ingredient
SMTT02769	PTEN	10	Phosphatase And Tensin Homolog	Phosphatidylinositol 3,4,5-trisphosphate 3-phosphatase And Dual-specificity Protein Phosphatase PTEN	ENSG00000171862	P60484	0.0154104	0.0339177	1.0	By_ingredient
SMTT02776	PTGS1		prostaglandin-endoperoxide synthase 1	Prostaglandin G/H Synthase 1		P23219	0.00202633	0.0118108	1.0	By_ingredient
SMTT02777	PTGS2		prostaglandin-endoperoxide synthase 2	Prostaglandin G/H Synthase 2		P35354	0.0164897	0.0349603	1.0	By_ingredient
SMTT02865	RELA		RELA proto-oncogene, NF-kB subunit	Transcription Factor P65		Q04206	0.199012	0.226574	1.0	By_ingredient
SMTT02969	RXRA		retinoid X receptor alpha	Retinoic Acid Receptor RXR-alpha		P19793	0.0157775	0.0341619	1.0	By_ingredient
SMTT03005	SCN5A	3	Sodium Voltage-gated Channel Alpha Subunit 5	Sodium Channel Protein Type 5 Subunit Alpha	ENSG00000183873	Q14524	0.884948	0.899387	1.0	By_ingredient
SMTT03048	SERPINE1	7	Serpin Family E Member 1	Plasminogen Activator Inhibitor 1	ENSG00000106366	P05121	0.0192268	0.038405	1.0	By_ingredient
SMTT03127	SLC22A5	5	Solute Carrier Family 22 Member 5	Solute Carrier Family 22 Member 5	ENSG00000197375	O76082	0.00193907	0.0114304	1.0	By_ingredient
SMTT03155	SLC2A2	3	Solute Carrier Family 2 Member 2	Solute Carrier Family 2, Facilitated Glucose Transporter Member 2	ENSG00000163581	P11168	0.00193907	0.0114304	1.0	By_ingredient
SMTT03193	SLC6A2	16	Solute Carrier Family 6 Member 2	Sodium-dependent Noradrenaline Transporter	ENSG00000103546	P23975	0.141464	0.167389	1.0	By_ingredient
SMTT03253	SOAT1		sterol O-acyltransferase 1	Sterol O-acyltransferase 1		P35610	0.00580624	0.0204115	1.0	By_ingredient
SMTT03256	SOD1	21	Superoxide Dismutase 1	Superoxide Dismutase [Cu-Zn]	ENSG00000142168	P00441	0.0819431	0.10618	1.0	By_ingredient
SMTT03447	TGFB1	19	Transforming Growth Factor Beta 1	Transforming Growth Factor Beta-1	ENSG00000105329	P01137	0.0492433	0.0716808	1.0	By_ingredient
SMTT03502	TNF		tumor necrosis factor	Tumor Necrosis Factor		P01375	0.0237091	0.04372	1.0	By_ingredient
SMTT03590	TRPV1		transient receptor potential cation channel subfamily V member 1	Transient Receptor Potential Cation Channel Subfamily V Member 1		Q8NER1	5.47e-05	0.000964	1.0	By_ingredient
SMTT03662	UCP2	11	Uncoupling Protein 2		ENSG00000175567		2.19e-05	0.000496	1.0	By_ingredient
SMTT03844	CCK	3	Cholecystokinin		ENSG00000187094	P06307	0.00580624	0.0204115	1.0	By_ingredient
SMTT03877	BAX	19	BCL2 Associated X, Apoptosis Regulator		ENSG00000087088	Q07812	0.11871	0.144304	1.0	By_ingredient
SMTT03918	CASP9	1	Caspase 9		ENSG00000132906	P55211	0.0837273	0.108066	1.0	By_ingredient
SMTT03934	GAP43	3	Growth Associated Protein 43		ENSG00000172020	P17677	0.00965882	0.0263305	1.0	By_ingredient
SMTT03938	GCG	2	Glucagon		ENSG00000115263	P01275	0.00580624	0.0204115	1.0	By_ingredient
SMTT03952	FABP1	2	Fatty Acid Binding Protein 1		ENSG00000163586	P07148	3.66e-06	0.000131	0.323471	By_ingredient
SMTT03993	SCD	10	Stearoyl-CoA Desaturase		ENSG00000099194	O00767	0.00193907	0.0114304	1.0	By_ingredient
SMTT04023	RBP2	3	Retinol Binding Protein 2		ENSG00000114113	P50120	3.66e-06	0.000131	0.323471	By_ingredient
SMTT04030	CITED1	X	Cbp/p300 Interacting Transactivator With Glu/Asp Rich Carboxy-terminal Domain 1		ENSG00000125931	Q99966	0.00193907	0.0114304	1.0	By_ingredient
SMTT04047	PYY	17	Peptide YY		ENSG00000131096	P10082	0.00193907	0.0114304	1.0	By_ingredient
SMTT04068	UCP3	11	Uncoupling Protein 3		ENSG00000175564	P55916	0.00387448	0.0167014	1.0	By_ingredient
SMTT04076	TEP1	14	Telomerase Associated Protein 1		ENSG00000129566	Q99973	0.0287047	0.0495009	1.0	By_ingredient
SMTT04088	TRIM26	6	Tripartite Motif Containing 26		ENSG00000234127	Q12899	0.00193907	0.0114304	1.0	By_ingredient
SMTT04091	SP1	12	Sp1 Transcription Factor		ENSG00000185591	P08047	0.00387448	0.0167014	1.0	By_ingredient
SMTT04128	ABI1	10	Abl Interactor 1		ENSG00000136754	Q8IZP0	0.00193907	0.0114304	1.0	By_ingredient
SMTT04237	PLB1	2	Phospholipase B1		ENSG00000163803	Q6P1J6	7.33e-05	0.00118	1.0	By_ingredient
SMTT04239	ENPP7	17	Ectonucleotide Pyrophosphatase/phosphodiesterase 7		ENSG00000182156	Q6UWV6	0.00387448	0.0167014	1.0	By_ingredient
SMTT04245	GUSBP1	5	Glucuronidase, Beta Pseudogene 1		ENSG00000183666	Q15486	0.00580624	0.0204115	1.0	By_ingredient
SMTT04266	CDC2		Cell Division Control Protein 2 Homolog/cyclin dependent kinase 1			P06493	0.0547709	0.0777128	1.0	By_ingredient
SMTT04275	crn-7		Cell-death-related Nuclease 7			P34387	0.00193907	0.0114304	1.0	By_ingredient
