# Supplementary material for: A Network Pharmacology-Based Study on Irritable Bowel Syndrome Prevention and Treatment Utilizing Shenling Baizhu Powder
Source: Biomed Res Int. 2021 Nov 23;2021:4579850. doi: 10.1155/2021/4579850 (PMC8632384; doi:10.1155/2021/4579850)
Supplement: Supplementary Materials — Please find detailed data in the supplementary file, including the original data of SymMap, metabolomics, and molecular docking of Shenling Baizhu powder. “Shenling Baizhu powder SymMap” includes all herbal targets and combined targets. “Shenling Baizhu powder metabolomics” includes two-dimensional structural data analysis. “Molecular docking” involves molecule-target docking and the results. [file 4579850.f1.zip › Data in brief/1. Shenling Baizhu powder Symmap/Ginseng.csv]

Target id	Gene symbol	Chromosome	Gene name	Protein name	Ensembl id	UniProt id	P_value	FDR(BH)	FDR(Bonferroni)	Relationship
SMTT00005	AAGAB	15	Alpha And Gamma Adaptin Binding Protein		ENSG00000103591		0.0230332	0.0428673	1.0	By_ingredient
SMTT00010	ABAT	16	4-aminobutyrate Aminotransferase	4-aminobutyrate Aminotransferase, Mitochondrial	ENSG00000183044	P80404	0.670285	0.69836	1.0	By_ingredient
SMTT00016	ABCB1		ATP-binding cassette, sub-family B (MDR/TAP), member 1	Multidrug Resistance Protein 1		P08183	0.0200662	0.0393174	1.0	By_ingredient
SMTT00032	ABCG2		ATP-binding cassette, sub-family G (WHITE), member 2	ATP-binding Cassette Sub-family G Member 2		Q9UNQ0	0.00194329	0.011443	1.0	By_ingredient
SMTT00049	ACE	17	Angiotensin I Converting Enzyme	Angiotensin-converting Enzyme	ENSG00000159640	P12821	0.000789327	0.00612451	1.0	By_ingredient
SMTT00051	ACHE		acetylcholinesterase (Yt blood group)	Acetylcholinesterase		P22303	0.856986	0.873694	1.0	By_ingredient
SMTT00056	ACPP		acid phosphatase, prostate	Prostatic Acid Phosphatase		P15309	0.0783315	0.102339	1.0	By_ingredient
SMTT00092	ADCYAP1		adenylate cyclase activating polypeptide 1	Pituitary Adenylate Cyclase-activating Polypeptide		P18509	0.0230332	0.0428673	1.0	By_ingredient
SMTT00102	ADRA1A		adrenergic, alpha-1A-, receptor	Alpha-1A Adrenergic Receptor		P35348	0.0855791	0.110005	1.0	By_ingredient
SMTT00103	ADRA2A		adrenergic, alpha-2A-, receptor	Alpha-2A Adrenergic Receptor		P08913	0.418204	0.450128	1.0	By_ingredient
SMTT00105	ADRB1		adrenergic, beta-1-, receptor	Beta-1 Adrenergic Receptor		P08588	0.418536	0.450457	1.0	By_ingredient
SMTT00106	ADRB2		adrenergic, beta-2-, receptor, surface	Beta-2 Adrenergic Receptor		P07550	0.201306	0.228967	1.0	By_ingredient
SMTT00123	AGTR1	3	Angiotensin II Receptor Type 1	Type-1 Angiotensin II Receptor	ENSG00000144891	P30556	0.000789327	0.00612451	1.0	By_ingredient
SMTT00129	AHR		Aryl hydrocarbon receptor	Aryl Hydrocarbon Receptor		P35869	0.000768324	0.00601288	1.0	By_ingredient
SMTT00139	AKR1B1		Aldo-keto reductase family 1, member B1 (aldose reductase)	Aldose Reductase		P15121	0.620566	0.650261	1.0	By_ingredient
SMTT00142	AKR1C3		aldo-keto reductase family 1 member C3	Aldo-keto Reductase Family 1 Member C3		P42330	0.0783315	0.102339	1.0	By_ingredient
SMTT00144	AKT1	14	AKT Serine/threonine Kinase 1	RAC-alpha Serine/threonine-protein Kinase	ENSG00000142208	P31749	0.00960038	0.026265	1.0	By_ingredient
SMTT00175	ALOX5		arachidonate 5-lipoxygenase	Arachidonate 5-lipoxygenase		P09917	0.295165	0.325092	1.0	By_ingredient
SMTT00226	APAF1		Apoptotic peptidase activating factor 1	Apoptotic Protease-activating Factor 1		O14727	0.000789327	0.00612451	1.0	By_ingredient
SMTT00232	APOB	2	Apolipoprotein B		ENSG00000084674		0.0565964	0.0795646	1.0	By_ingredient
SMTT00244	AR	X	Androgen Receptor	Androgen Receptor	ENSG00000169083	P10275	0.977443	0.981843	1.0	By_ingredient
SMTT00356	BCHE		butyrylcholinesterase	Cholinesterase		P06276	0.569049	0.600265	1.0	By_ingredient
SMTT00361	BCL2	18	BCL2, Apoptosis Regulator	Apoptosis Regulator Bcl-2	ENSG00000171791	P10415	0.000144408	0.00188737	1.0	By_ingredient
SMTT00362	BCL2L1		BCL2 like 1	Bcl-2-like Protein 1		Q07817	0.311424	0.341756	1.0	By_ingredient
SMTT00379	BIRC3	11	Baculoviral IAP Repeat Containing 3		ENSG00000023445		0.0455382	0.0678196	1.0	By_ingredient
SMTT00380	BIRC5		Baculoviral IAP repeat containing 5	Baculoviral IAP Repeat-containing Protein 5		O15392	0.179752	0.206745	1.0	By_ingredient
SMTT00389	BMP2	20	Bone Morphogenetic Protein 2		ENSG00000125845		0.067527	0.0910636	1.0	By_ingredient
SMTT00401	BRCA1	17	BRCA1, DNA Repair Associated		ENSG00000012048		0.0230332	0.0428673	1.0	By_ingredient
SMTT00402	BRCA2	13	BRCA2, DNA Repair Associated		ENSG00000139618		0.0115834	0.0287235	1.0	By_ingredient
SMTT00436	CA2	8	Carbonic Anhydrase 2	Carbonic Anhydrase 2	ENSG00000104267	P00918	0.967504	0.973208	1.0	By_ingredient
SMTT00461	CALM3	19	Calmodulin 3		ENSG00000160014		0.768625	0.791525	1.0	By_ingredient
SMTT00477	CASP1		caspase 1	Caspase-1		P29466	0.034351	0.0557104	1.0	By_ingredient
SMTT00480	CASP3		Caspase 3	Caspase-3		P42574	0.0147784	0.033077	1.0	By_ingredient
SMTT00487	CAT	11	Catalase	Catalase	ENSG00000121691	P04040	0.117898	0.143466	1.0	By_ingredient
SMTT00516	CCL2		C-C motif chemokine ligand 2	C-C Motif Chemokine 2		P13500	0.00151155	0.00968186	1.0	By_ingredient
SMTT00520	CCNA2		cyclin A2	Cyclin-A2		P20248	0.980949	0.984972	1.0	By_ingredient
SMTT00521	CCND1	11	Cyclin D1	G1/S-specific Cyclin-D1	ENSG00000110092	P24385	0.0920945	0.116753	1.0	By_ingredient
SMTT00522	CCND2	12	Cyclin D2		ENSG00000118971		0.0455382	0.0678196	1.0	By_ingredient
SMTT00526	CCR2		C-C motif chemokine receptor 2	C-C Chemokine Receptor Type 2		P41597	0.0115834	0.0287235	1.0	By_ingredient
SMTT00538	CD28	2	CD28 Molecule		ENSG00000178562		0.0230332	0.0428673	1.0	By_ingredient
SMTT00540	CD320	19	CD320 Molecule		ENSG00000167775		0.0115834	0.0287235	1.0	By_ingredient
SMTT00552	CD80		CD80 molecule	T-lymphocyte Activation Antigen CD80		P33681	0.00357238	0.0160937	1.0	By_ingredient
SMTT00559	CDC42	1	Cell Division Cycle 42	Cell Division Control Protein 42 Homolog	ENSG00000070831	P60953	0.0230332	0.0428673	1.0	By_ingredient
SMTT00569	CDK2		cyclin dependent kinase 2	Cyclin-dependent Kinase 2		P24941	0.995089	0.996747	1.0	By_ingredient
SMTT00570	CDK4	12	Cyclin Dependent Kinase 4	Cyclin-dependent Kinase 4	ENSG00000135446	P11802	0.00494411	0.0188592	1.0	By_ingredient
SMTT00574	CDK6	7	Cyclin Dependent Kinase 6	Cyclin-dependent Kinase 6	ENSG00000105810	Q00534	0.0045581	0.0182514	1.0	By_ingredient
SMTT00575	CDK7		cyclin dependent kinase 7	Cyclin-dependent Kinase 7		P50613	0.000397705	0.00379581	1.0	By_ingredient
SMTT00577	CDKN1A	6	Cyclin Dependent Kinase Inhibitor 1A	Cyclin-dependent Kinase Inhibitor 1	ENSG00000124762	P38936	0.408379	0.440147	1.0	By_ingredient
SMTT00636	CHRM1		cholinergic receptor muscarinic 1	Muscarinic Acetylcholine Receptor M1		P11229	0.0276891	0.0483964	1.0	By_ingredient
SMTT00721	COL1A1	17	Collagen Type I Alpha 1 Chain	Collagen Alpha-1(I) Chain	ENSG00000108821	P02452	0.140591	0.166542	1.0	By_ingredient
SMTT00725	COL2A1	12	Collagen Type II Alpha 1 Chain	Collagen Alpha-1(II) Chain	ENSG00000139219	P02458	0.000133591	0.00178782	1.0	By_ingredient
SMTT00748	COMT	22	Catechol-O-methyltransferase	Catechol O-methyltransferase	ENSG00000093010	P21964	0.0565964	0.0795646	1.0	By_ingredient
SMTT00786	CREB1	2	CAMP Responsive Element Binding Protein 1	Cyclic AMP-responsive Element-binding Protein 1	ENSG00000118260	P16220	0.140591	0.166542	1.0	By_ingredient
SMTT00793	CRP		C-reactive protein	C-reactive Protein		P02741	0.0455382	0.0678196	1.0	By_ingredient
SMTT00830	CTNNB1	3	Catenin Beta 1	Catenin Beta-1	ENSG00000168036	P35222	0.140591	0.166542	1.0	By_ingredient
SMTT00838	CTSD	11	Cathepsin D	Cathepsin D	ENSG00000117984	P07339	0.230448	0.258872	1.0	By_ingredient
SMTT00851	CXCL8		C-X-C motif chemokine ligand 8	Interleukin-8		P10145	0.278523	0.308114	1.0	By_ingredient
SMTT00864	CYP19A1	15	Cytochrome P450 Family 19 Subfamily A Member 1	Aromatase	ENSG00000137869	P11511	0.000508031	0.00448769	1.0	By_ingredient
SMTT00865	CYP1A1		cytochrome P450 family 1 subfamily A member 1	Cytochrome P450 1A1		P04798	0.0387788	0.06056	1.0	By_ingredient
SMTT00866	CYP1A2		cytochrome P450 family 1 subfamily A member 2	Cytochrome P450 1A2		P05177	0.189262	0.216608	1.0	By_ingredient
SMTT00867	CYP1B1	2	Cytochrome P450 Family 1 Subfamily B Member 1	Cytochrome P450 1B1	ENSG00000138061	Q16678	0.00194329	0.011443	1.0	By_ingredient
SMTT00883	CYP3A4		cytochrome P450 family 3 subfamily A member 4	Cytochrome P450 3A4		P08684	0.0498571	0.0723329	1.0	By_ingredient
SMTT00920	DDIT3	12	DNA Damage Inducible Transcript 3		ENSG00000175197		0.0565964	0.0795646	1.0	By_ingredient
SMTT01033	DUOX2	15	Dual Oxidase 2		ENSG00000140279		0.00565429	0.0201439	1.0	By_ingredient
SMTT01057	EDN1	6	Endothelin 1	Endothelin-1	ENSG00000078401	P05305	0.130513	0.156289	1.0	By_ingredient
SMTT01084	EIF6		eukaryotic translation initiation factor 6	Eukaryotic Translation Initiation Factor 6		P56537	0.286892	0.316663	1.0	By_ingredient
SMTT01141	ESR1	6	Estrogen Receptor 1	Estrogen Receptor	ENSG00000091831	P03372	0.99708	0.998321	1.0	By_ingredient
SMTT01142	ESR2		estrogen receptor 2	Estrogen Receptor Beta		Q92731	0.921677	0.932716	1.0	By_ingredient
SMTT01170	F3		coagulation factor III, tissue factor	Tissue Factor		P13726	0.0127006	0.0303054	1.0	By_ingredient
SMTT01232	FGF2		fibroblast growth factor 2	Fibroblast Growth Factor 2		P09038	0.0110912	0.0281227	1.0	By_ingredient
SMTT01272	FOS	14	Fos Proto-oncogene, AP-1 Transcription Factor Subunit	Proto-oncogene C-Fos	ENSG00000170345	P01100	0.394399	0.426057	1.0	By_ingredient
SMTT01282	FOXO1	13	Forkhead Box O1		ENSG00000150907		0.0230332	0.0428673	1.0	By_ingredient
SMTT01353	GCH1	14	GTP Cyclohydrolase 1	GTP Cyclohydrolase 1	ENSG00000131979	P30793	0.0230332	0.0428673	1.0	By_ingredient
SMTT01355	GCLC	6	Glutamate-cysteine Ligase Catalytic Subunit	Glutamate--cysteine Ligase Catalytic Subunit	ENSG00000001084	P48506	0.034351	0.0557104	1.0	By_ingredient
SMTT01380	GJA1	6	Gap Junction Protein Alpha 1	Gap Junction Alpha-1 Protein	ENSG00000152661	P17302	0.0110912	0.0281227	1.0	By_ingredient
SMTT01392	GLB1	3	Galactosidase Beta 1		ENSG00000170266		0.270056	0.299358	1.0	By_ingredient
SMTT01406	GLUL	1	Glutamate-ammonia Ligase	Glutamine Synthetase	ENSG00000135821	P15104	0.067527	0.0910636	1.0	By_ingredient
SMTT01436	GOT1		glutamic-oxaloacetic transaminase 1	Aspartate Aminotransferase, Cytoplasmic		P17174	0.387287	0.41885	1.0	By_ingredient
SMTT01464	GRIA2		glutamate ionotropic receptor AMPA type subunit 2	Glutamate Receptor 2		P42262	0.113186	0.138665	1.0	By_ingredient
SMTT01468	GRIN1	9	Glutamate Ionotropic Receptor NMDA Type Subunit 1	Glutamate Receptor Ionotropic, NMDA 1	ENSG00000176884	Q05586	0.198661	0.226239	1.0	By_ingredient
SMTT01483	GSK3B		glycogen synthase kinase 3 beta	Glycogen Synthase Kinase-3 Beta		P49841	0.985498	0.988877	1.0	By_ingredient
SMTT01486	GSS	20	Glutathione Synthetase	Glutathione Synthetase	ENSG00000100983	P48637	0.0115834	0.0287235	1.0	By_ingredient
SMTT01489	GSTM1		glutathione S-transferase mu 1	Glutathione S-transferase Mu 1		P09488	0.120317	0.145888	1.0	By_ingredient
SMTT01490	GSTM2		glutathione S-transferase mu 2	Glutathione S-transferase Mu 2		P28161	0.0565964	0.0795646	1.0	By_ingredient
SMTT01491	GSTP1		glutathione S-transferase pi 1	Glutathione S-transferase P		P09211	0.278523	0.308114	1.0	By_ingredient
SMTT01545	HGF	7	Hepatocyte Growth Factor	Hepatocyte Growth Factor	ENSG00000019991	P14210	0.000397705	0.00379581	1.0	By_ingredient
SMTT01550	HIF1A		hypoxia inducible factor 1 subunit alpha	Hypoxia-inducible Factor 1-alpha		Q16665	0.226215	0.254514	1.0	By_ingredient
SMTT01569	HMOX1	22	Heme Oxygenase 1	Heme Oxygenase 1	ENSG00000100292	P09601	0.270056	0.299358	1.0	By_ingredient
SMTT01618	HSPA5		heat shock protein family A (Hsp70) member 5	Endoplasmic reticulum chaperone BiP		P11021	0.00357238	0.0160937	1.0	By_ingredient
SMTT01628	HTR3A		6-hydroxytryptamine receptor 3A	5-hydroxytryptamine Receptor 3A		P46098	0.245635	0.274419	1.0	By_ingredient
SMTT01638	ICAM1		intercellular adhesion molecule 1	Intercellular Adhesion Molecule 1		P05362	0.00704419	0.0225739	1.0	By_ingredient
SMTT01652	IFNG		interferon gamma	Interferon Gamma		P01579	0.0025937	0.0136825	1.0	By_ingredient
SMTT01664	IGF1R	15	Insulin Like Growth Factor 1 Receptor	Insulin-like Growth Factor 1 Receptor	ENSG00000140443	P08069	0.130513	0.156289	1.0	By_ingredient
SMTT01671	IGHG1		immunoglobulin heavy constant gamma 1	Immunoglobulin heavy constant gamma 1		P01857	0.000544389	0.00469533	1.0	By_ingredient
SMTT01679	IKBKB	8	Inhibitor Of Nuclear Factor Kappa B Kinase Subunit Beta	Inhibitor Of Nuclear Factor Kappa-B Kinase Subunit Beta	ENSG00000104365	O14920	0.0890114	0.113497	1.0	By_ingredient
SMTT01682	IL10	1	Interleukin 10	Interleukin-10	ENSG00000136634	P22301	0.00151155	0.00968186	1.0	By_ingredient
SMTT01696	IL1A		interleukin 1 alpha	Interleukin-1 Alpha		P01583	0.00269986	0.0139812	1.0	By_ingredient
SMTT01697	IL1B		interleukin 1 beta	Interleukin-1 Beta		P01584	0.00180048	0.0109328	1.0	By_ingredient
SMTT01700	IL2		interleukin 2	Interleukin-2		P60568	0.0025937	0.0136825	1.0	By_ingredient
SMTT01710	IL4		interleukin 4	Interleukin-4		P05112	0.278523	0.308114	1.0	By_ingredient
SMTT01712	IL6	7	Interleukin 6	Interleukin-6	ENSG00000136244	P05231	0.000471308	0.00425868	1.0	By_ingredient
SMTT01726	INSR	19	Insulin Receptor	Insulin Receptor	ENSG00000171105	P06213	0.067527	0.0910636	1.0	By_ingredient
SMTT01737	IRS1		insulin receptor substrate 1	Insulin Receptor Substrate 1		P35568	0.0115834	0.0287235	1.0	By_ingredient
SMTT01755	ITGB1		integrin subunit beta 1	Integrin Beta-1		P05556	0.00130549	0.0087721	1.0	By_ingredient
SMTT01770	JAK1		Janus kinase 1	Tyrosine-protein Kinase JAK1		P23458	0.0230332	0.0428673	1.0	By_ingredient
SMTT01778	JUN		Jun proto-oncogene, AP-1 transcription factor subunit	Transcription Factor AP-1		P05412	0.000135946	0.00181166	1.0	By_ingredient
SMTT01803	KCNH2	7	Potassium Voltage-gated Channel Subfamily H Member 2	Potassium Voltage-gated Channel Subfamily H Member 2	ENSG00000055118	Q12809	0.880897	0.895611	1.0	By_ingredient
SMTT01833	KDR	4	Kinase Insert Domain Receptor	Vascular Endothelial Growth Factor Receptor 2	ENSG00000128052	P35968	0.878383	0.893353	1.0	By_ingredient
SMTT01926	LCT	2	Lactase	Lactase-phlorizin Hydrolase	ENSG00000115850	P09848	0.0144052	0.0327109	1.0	By_ingredient
SMTT01939	LGSN		lengsin, lens protein with glutamine synthetase domain	Lengsin		Q5TDP6	0.0115834	0.0287235	1.0	By_ingredient
SMTT02024	MAOA	X	Monoamine Oxidase A	Amine Oxidase [flavin-containing] A	ENSG00000189221	P21397	0.0755683	0.099571	1.0	By_ingredient
SMTT02025	MAOB		monoamine oxidase B	Amine Oxidase [flavin-containing] B		P27338	0.154067	0.180284	1.0	By_ingredient
SMTT02027	MAP2		microtubule associated protein 2	Microtubule-associated Protein 2		P11137	0.0455382	0.0678196	1.0	By_ingredient
SMTT02033	MAPK1	22	Mitogen-activated Protein Kinase 1	Mitogen-activated Protein Kinase 1	ENSG00000100030	P28482	0.380091	0.411617	1.0	By_ingredient
SMTT02037	MAPK3		Mitogen-activated Protein Kinase 3	Mitogen-activated Protein Kinase 3		P27361	0.00448762	0.018051	1.0	By_ingredient
SMTT02038	MAPK8		Mitogen-activated Protein Kinase 8	Mitogen-activated Protein Kinase 8		P45983	0.00151155	0.00968186	1.0	By_ingredient
SMTT02062	MCL1		MCL1, BCL2 family apoptosis regulator	Induced Myeloid Leukemia Cell Differentiation Protein Mcl-1		Q07820	0.110003	0.135356	1.0	By_ingredient
SMTT02095	MGAM		maltase-glucoamylase	Maltase-glucoamylase, Intestinal		O43451	0.0068583	0.0223181	1.0	By_ingredient
SMTT02132	MMP1	11	Matrix Metallopeptidase 1	Interstitial Collagenase	ENSG00000196611	P03956	0.244057	0.27278	1.0	By_ingredient
SMTT02137	MMP2	16	Matrix Metallopeptidase 2	72 KDa Type IV Collagenase	ENSG00000087245	P08253	0.00960038	0.026265	1.0	By_ingredient
SMTT02143	MMP9	20	Matrix Metallopeptidase 9	Matrix Metalloproteinase-9	ENSG00000100985	P14780	0.0134645	0.0313115	1.0	By_ingredient
SMTT02157	MPO	17	Myeloperoxidase	Myeloperoxidase	ENSG00000005381	P05164	0.0221278	0.0417947	1.0	By_ingredient
SMTT02193	MTTP	4	Microsomal Triglyceride Transfer Protein	Microsomal Triglyceride Transfer Protein Large Subunit	ENSG00000138823	P55157	0.0455382	0.0678196	1.0	By_ingredient
SMTT02203	MYC	8	MYC Proto-oncogene, BHLH Transcription Factor	Myc Proto-oncogene Protein	ENSG00000136997	P01106	0.036177	0.057617	1.0	By_ingredient
SMTT02251	NCOA1		nuclear receptor coactivator 1	Nuclear Receptor Coactivator 1		Q15788	0.952706	0.96028	1.0	By_ingredient
SMTT02314	NFKBIA	14	NFKB Inhibitor Alpha	NF-kappa-B Inhibitor Alpha	ENSG00000100906	P25963	0.0588182	0.0819652	1.0	By_ingredient
SMTT02349	NOS2		nitric oxide synthase 2	Nitric Oxide Synthase, Inducible		P35228	0.898559	0.911596	1.0	By_ingredient
SMTT02350	NOS3		nitric oxide synthase 3	Nitric Oxide Synthase, Endothelial		P29474	0.207953	0.235811	1.0	By_ingredient
SMTT02368	NQO1		NAD(P)H quinone dehydrogenase 1	NAD(P)H Dehydrogenase [quinone] 1		P15559	0.0045581	0.0182514	1.0	By_ingredient
SMTT02372	NR1H3		nuclear receptor subfamily 1 group H member 3	Oxysterols Receptor LXR-alpha		Q13133	0.000133591	0.00178782	1.0	By_ingredient
SMTT02374	NR1I2		nuclear receptor subfamily 1 group I member 2	Nuclear Receptor Subfamily 1 Group I Member 2		O75469	0.252824	0.281784	1.0	By_ingredient
SMTT02375	NR1I3		nuclear receptor subfamily 1 group I member 3	Nuclear Receptor Subfamily 1 Group I Member 3		Q14994	0.0455382	0.0678196	1.0	By_ingredient
SMTT02379	NR3C1	5	Nuclear Receptor Subfamily 3 Group C Member 1	Glucocorticoid Receptor	ENSG00000113580	P04150	0.840951	0.85895	1.0	By_ingredient
SMTT02380	NR3C2	4	Nuclear Receptor Subfamily 3 Group C Member 2	Mineralocorticoid Receptor	ENSG00000151623	P08235	0.888887	0.902956	1.0	By_ingredient
SMTT02401	NTRK1	1	Neurotrophic Receptor Tyrosine Kinase 1	High Affinity Nerve Growth Factor Receptor	ENSG00000198400	P04629	0.000397705	0.00379581	1.0	By_ingredient
SMTT02417	ODC1		ornithine decarboxylase 1	Ornithine Decarboxylase		P11926	0.0144052	0.0327109	1.0	By_ingredient
SMTT02428	OPRD1		opioid receptor delta 1	Delta-type Opioid Receptor		P41143	0.946684	0.955081	1.0	By_ingredient
SMTT02430	OPRM1		opioid receptor mu 1	Mu-type Opioid Receptor		P35372	0.890944	0.904816	1.0	By_ingredient
SMTT02467	PAPPA		pappalysin 1	Pappalysin-1		Q13219	0.0115834	0.0287235	1.0	By_ingredient
SMTT02495	PCYT1A	3	Phosphate Cytidylyltransferase 1, Choline, Alpha	Choline-phosphate Cytidylyltransferase A	ENSG00000161217	P49585	0.0115834	0.0287235	1.0	By_ingredient
SMTT02550	PGR	11	Progesterone Receptor	Progesterone Receptor	ENSG00000082175	P06401	0.926052	0.936581	1.0	By_ingredient
SMTT02591	PKD1	16	Polycystin 1, Transient Receptor Potential Channel Interacting		ENSG00000008710		0.0115834	0.0287235	1.0	By_ingredient
SMTT02603	PLAT	8	Plasminogen Activator, Tissue Type	Tissue-type Plasminogen Activator	ENSG00000104368	P00750	0.000508031	0.00448769	1.0	By_ingredient
SMTT02604	PLAU	10	Plasminogen Activator, Urokinase	Urokinase-type Plasminogen Activator	ENSG00000122861	P00749	0.0054276	0.0196024	1.0	By_ingredient
SMTT02668	PON1	7	Paraoxonase 1	Serum Paraoxonase/arylesterase 1	ENSG00000005421	P27169	0.000122373	0.00168377	1.0	By_ingredient
SMTT02671	POR	7	Cytochrome P450 Oxidoreductase	NADPH--cytochrome P450 Reductase	ENSG00000127948	P16435	0.0783315	0.102339	1.0	By_ingredient
SMTT02679	PPARA		peroxisome proliferator activated receptor alpha	Peroxisome Proliferator-activated Receptor Alpha		Q07869	0.150552	0.176685	1.0	By_ingredient
SMTT02681	PPARG	3	Peroxisome Proliferator Activated Receptor Gamma	Peroxisome Proliferator-activated Receptor Gamma	ENSG00000132170	P37231	0.0469907	0.0693271	1.0	By_ingredient
SMTT02696	PPP3CA		protein phosphatase 3 catalytic subunit alpha	Serine/threonine-protein Phosphatase 2B Catalytic Subunit Alpha Isoform		Q08209	0.034351	0.0557104	1.0	By_ingredient
SMTT02715	PRKAG2	7	Protein Kinase AMP-activated Non-catalytic Subunit Gamma 2	5'-AMP-activated Protein Kinase Subunit Gamma-2	ENSG00000106617	Q9UGJ0	0.0565964	0.0795646	1.0	By_ingredient
SMTT02717	PRKCA		protein kinase C alpha	Protein Kinase C Alpha Type		P17252	0.099568	0.124525	1.0	By_ingredient
SMTT02718	PRKCB		protein kinase C beta	Protein Kinase C Beta Type		P05771	0.278523	0.308114	1.0	By_ingredient
SMTT02719	PRKCD	3	Protein Kinase C Delta	Protein Kinase C Delta Type	ENSG00000163932	Q05655	0.0783315	0.102339	1.0	By_ingredient
SMTT02747	PRSS1	7	Serine Protease 1	Trypsin-1	ENSG00000204983	P07477	0.948575	0.956781	1.0	By_ingredient
SMTT02769	PTEN	10	Phosphatase And Tensin Homolog	Phosphatidylinositol 3,4,5-trisphosphate 3-phosphatase And Dual-specificity Protein Phosphatase PTEN	ENSG00000171862	P60484	0.00357238	0.0160937	1.0	By_ingredient
SMTT02772	PTGER3		prostaglandin E receptor 3	Prostaglandin E2 Receptor EP3 Subtype		P43115	0.0890114	0.113497	1.0	By_ingredient
SMTT02776	PTGS1		prostaglandin-endoperoxide synthase 1	Prostaglandin G/H Synthase 1		P23219	0.000138599	0.00183239	1.0	By_ingredient
SMTT02777	PTGS2		prostaglandin-endoperoxide synthase 2	Prostaglandin G/H Synthase 2		P35354	0.000189792	0.00228651	1.0	By_ingredient
SMTT02783	PTPN1		protein tyrosine phosphatase, non-receptor type 1	Tyrosine-protein Phosphatase Non-receptor Type 1		P18031	0.034351	0.0557104	1.0	By_ingredient
SMTT02842	RB1	13	RB Transcriptional Corepressor 1	Retinoblastoma-associated Protein	ENSG00000139687	P06400	0.130513	0.156289	1.0	By_ingredient
SMTT02865	RELA		RELA proto-oncogene, NF-kB subunit	Transcription Factor P65		Q04206	0.043668	0.0657877	1.0	By_ingredient
SMTT02946	RPS6		ribosomal protein S6	40S Ribosomal Protein S6		P62753	0.0115834	0.0287235	1.0	By_ingredient
SMTT02969	RXRA		retinoid X receptor alpha	Retinoic Acid Receptor RXR-alpha		P19793	0.0175348	0.0364229	1.0	By_ingredient
SMTT03005	SCN5A	3	Sodium Voltage-gated Channel Alpha Subunit 5	Sodium Channel Protein Type 5 Subunit Alpha	ENSG00000183873	Q14524	0.81111	0.831276	1.0	By_ingredient
SMTT03028	SELE		selectin E	E-selectin		P16581	0.000768324	0.00601288	1.0	By_ingredient
SMTT03092	SIRT1		Sirtuin 1	NAD-dependent Protein Deacetylase Sirtuin-1		Q96EB6	0.0565964	0.0795646	1.0	By_ingredient
SMTT03127	SLC22A5	5	Solute Carrier Family 22 Member 5	Solute Carrier Family 22 Member 5	ENSG00000197375	O76082	0.0115834	0.0287235	1.0	By_ingredient
SMTT03193	SLC6A2	16	Solute Carrier Family 6 Member 2	Sodium-dependent Noradrenaline Transporter	ENSG00000103546	P23975	0.000119365	0.00165486	1.0	By_ingredient
SMTT03195	SLC6A3	5	Solute Carrier Family 6 Member 3	Sodium-dependent Dopamine Transporter	ENSG00000142319	Q01959	0.176718	0.203655	1.0	By_ingredient
SMTT03196	SLC6A4		solute carrier family 6 member 4	Sodium-dependent Serotonin Transporter		P31645	0.140092	0.166038	1.0	By_ingredient
SMTT03256	SOD1	21	Superoxide Dismutase 1	Superoxide Dismutase [Cu-Zn]	ENSG00000142168	P00441	0.0920945	0.116753	1.0	By_ingredient
SMTT03257	SOD2		superoxide dismutase 2	Superoxide Dismutase [Mn], Mitochondrial		P04179	0.120317	0.145888	1.0	By_ingredient
SMTT03273	SPARC	5	Secreted Protein Acidic And Cysteine Rich	SPARC	ENSG00000113140	P09486	0.0230332	0.0428673	1.0	By_ingredient
SMTT03300	SRC	20	SRC Proto-oncogene, Non-receptor Tyrosine Kinase	Proto-oncogene Tyrosine-protein Kinase Src	ENSG00000197122	P12931	0.130513	0.156289	1.0	By_ingredient
SMTT03304	SREBF1		sterol regulatory element binding transcription factor 1	Sterol Regulatory Element-binding Protein 1		P36956	0.099568	0.124525	1.0	By_ingredient
SMTT03317	STAT1	2	Signal Transducer And Activator Of Transcription 1		ENSG00000115415		0.0045581	0.0182514	1.0	By_ingredient
SMTT03319	STAT3	17	Signal Transducer And Activator Of Transcription 3	Signal Transducer And Activator Of Transcription 3	ENSG00000168610	P40763	0.160399	0.186873	1.0	By_ingredient
SMTT03347	SULT1E1		sulfotransferase family 1E member 1	Estrogen Sulfotransferase		P49888	0.00130549	0.0087721	1.0	By_ingredient
SMTT03446	TGFA	2	Transforming Growth Factor Alpha		ENSG00000163235		0.034351	0.0557104	1.0	By_ingredient
SMTT03447	TGFB1	19	Transforming Growth Factor Beta 1	Transforming Growth Factor Beta-1	ENSG00000105329	P01137	0.26149	0.29061	1.0	By_ingredient
SMTT03448	TGFB2	1	Transforming Growth Factor Beta 2		ENSG00000092969		0.0565964	0.0795646	1.0	By_ingredient
SMTT03502	TNF		tumor necrosis factor	Tumor Necrosis Factor		P01375	1.95e-07	1.41e-05	0.0172341	By_ingredient
SMTT03504	TNFRSF10B	8	TNF Receptor Superfamily Member 10b	Tumor Necrosis Factor Receptor Superfamily Member 10B	ENSG00000120889	O14763	0.034351	0.0557104	1.0	By_ingredient
SMTT03530	TP53	17	Tumor Protein P53	Cellular Tumor Antigen P53	ENSG00000141510	P04637	0.0201629	0.0394562	1.0	By_ingredient
SMTT03701	VCAM1		vascular cell adhesion molecule 1	Vascular Cell Adhesion Protein 1		P19320	0.00448762	0.018051	1.0	By_ingredient
SMTT03708	VEGFA		vascular endothelial growth factor A	Vascular Endothelial Growth Factor A		P15692	0.13336	0.159204	1.0	By_ingredient
SMTT03764	XDH	2	Xanthine Dehydrogenase	Xanthine Dehydrogenase/oxidase	ENSG00000158125	P47989	0.0016553	0.0103294	1.0	By_ingredient
SMTT03765	XIAP	X	X-linked Inhibitor Of Apoptosis	E3 Ubiquitin-protein Ligase XIAP	ENSG00000101966	P98170	0.099568	0.124525	1.0	By_ingredient
SMTT03845	CCNB1	5	Cyclin B1		ENSG00000134057	P14635	0.217137	0.245163	1.0	By_ingredient
SMTT03847	CCNE1	19	Cyclin E1		ENSG00000105173	P24864	0.0115834	0.0287235	1.0	By_ingredient
SMTT03851	EIF2S1	14	Eukaryotic Translation Initiation Factor 2 Subunit Alpha		ENSG00000134001	P05198	0.0230332	0.0428673	1.0	By_ingredient
SMTT03875	BAK1	6	BCL2 Antagonist/killer 1		ENSG00000030110	Q16611	0.0890114	0.113497	1.0	By_ingredient
SMTT03877	BAX	19	BCL2 Associated X, Apoptosis Regulator		ENSG00000087088	Q07812	0.0396473	0.0614491	1.0	By_ingredient
SMTT03881	BCL2A1	15	BCL2 Related Protein A1		ENSG00000140379	Q16548	0.0455382	0.0678196	1.0	By_ingredient
SMTT03893	DIO1	1	Iodothyronine Deiodinase 1		ENSG00000211452	P49895	0.067527	0.0910636	1.0	By_ingredient
SMTT03895	BSG	19	Basigin (Ok Blood Group)		ENSG00000172270	P35613	0.0115834	0.0287235	1.0	By_ingredient
SMTT03899	C5AR1	19	Complement C5a Receptor 1		ENSG00000197405	P21730	0.067527	0.0910636	1.0	By_ingredient
SMTT03918	CASP9	1	Caspase 9		ENSG00000132906	P55211	0.408379	0.440147	1.0	By_ingredient
SMTT03920	RUNX1T1	8	RUNX1 Translocation Partner 1		ENSG00000079102	Q06455	0.0783315	0.102339	1.0	By_ingredient
SMTT03925	XRCC6	22	X-ray Repair Cross Complementing 6		ENSG00000196419	P12956	0.0230332	0.0428673	1.0	By_ingredient
SMTT03927	HAS2	8	Hyaluronan Synthase 2		ENSG00000170961	Q92819	0.00194329	0.011443	1.0	By_ingredient
SMTT03929	MAP1B	5	Microtubule Associated Protein 1B		ENSG00000131711	P46821	0.0115834	0.0287235	1.0	By_ingredient
SMTT03983	BCAM	19	Basal Cell Adhesion Molecule (Lutheran Blood Group)		ENSG00000187244	P50895	0.0115834	0.0287235	1.0	By_ingredient
SMTT03990	NFE2L2	2	Nuclear Factor, Erythroid 2 Like 2		ENSG00000116044	Q16236	0.099568	0.124525	1.0	By_ingredient
SMTT04003	PMAIP1	18	Phorbol-12-myristate-13-acetate-induced Protein 1		ENSG00000141682	Q13794	0.034351	0.0557104	1.0	By_ingredient
SMTT04005	MAP2K4	17	Mitogen-activated Protein Kinase Kinase 4		ENSG00000065559	P45985	0.034351	0.0557104	1.0	By_ingredient
SMTT04044	PECAM1	17	Platelet And Endothelial Cell Adhesion Molecule 1		ENSG00000261371	P16284	0.0565964	0.0795646	1.0	By_ingredient
SMTT04055	PSMD3	17	Proteasome 26S Subunit, Non-ATPase 3		ENSG00000108344	O43242	0.0565964	0.0795646	1.0	By_ingredient
SMTT04060	PSMG1	21	Proteasome Assembly Chaperone 1		ENSG00000183527	O95456	0.0115834	0.0287235	1.0	By_ingredient
SMTT04065	TNFSF10	3	TNF Superfamily Member 10		ENSG00000121858	P50591	0.0230332	0.0428673	1.0	By_ingredient
SMTT04070	ABCC3	17	ATP Binding Cassette Subfamily C Member 3		ENSG00000108846	O15438	0.0115834	0.0287235	1.0	By_ingredient
SMTT04074	SLC2A4	17	Solute Carrier Family 2 Member 4		ENSG00000181856	P14672	0.000508031	0.00448769	1.0	By_ingredient
SMTT04076	TEP1	14	Telomerase Associated Protein 1		ENSG00000129566	Q99973	0.160399	0.186873	1.0	By_ingredient
SMTT04080	SLPI	20	Secretory Leukocyte Peptidase Inhibitor		ENSG00000124107	P03973	0.0115834	0.0287235	1.0	By_ingredient
SMTT04082	KLF10	8	Kruppel Like Factor 10		ENSG00000155090	Q13118	0.0115834	0.0287235	1.0	By_ingredient
SMTT04097	TRAF2	9	TNF Receptor Associated Factor 2		ENSG00000127191	Q12933	0.0115834	0.0287235	1.0	By_ingredient
SMTT04099	CCNE2	8	Cyclin E2		ENSG00000175305	O96020	0.0115834	0.0287235	1.0	By_ingredient
SMTT04106	AHSA1	14	Activator Of HSP90 ATPase Activity 1		ENSG00000100591	O95433	0.0311882	0.0521414	1.0	By_ingredient
SMTT04113	TNFRSF10A	8	TNF Receptor Superfamily Member 10a		ENSG00000104689	O00220	0.0230332	0.0428673	1.0	By_ingredient
SMTT04118	CFLAR	2	CASP8 And FADD Like Apoptosis Regulator		ENSG00000003402	O15519	0.0565964	0.0795646	1.0	By_ingredient
SMTT04127	PTGES	9	Prostaglandin E Synthase		ENSG00000148344	O14684	0.0455382	0.0678196	1.0	By_ingredient
SMTT04130	BCL2L11	2	BCL2 Like 11		ENSG00000153094	O43521	0.034351	0.0557104	1.0	By_ingredient
SMTT04135	PYGO1	15	Pygopus Family PHD Finger 1		ENSG00000171016	Q9Y3Y4	0.0115834	0.0287235	1.0	By_ingredient
SMTT04155	SIRT2	19	Sirtuin 2		ENSG00000068903	Q8IXJ6	0.0115834	0.0287235	1.0	By_ingredient
SMTT04160	IL17B	5	Interleukin 17B		ENSG00000127743	Q9UHF5	0.0115834	0.0287235	1.0	By_ingredient
SMTT04171	ADIPOR1	1	Adiponectin Receptor 1		ENSG00000159346	Q96A54	0.0115834	0.0287235	1.0	By_ingredient
SMTT04177	HERC5	4	HECT And RLD Domain Containing E3 Ubiquitin Protein Ligase 5		ENSG00000138646	Q9UII4	0.179752	0.206745	1.0	By_ingredient
SMTT04178	BBC3	19	BCL2 Binding Component 3		ENSG00000105327	Q9BXH1	0.0565964	0.0795646	1.0	By_ingredient
SMTT04201	CREBZF	11	CREB/ATF BZIP Transcription Factor		ENSG00000137504	Q9NS37	0.0115834	0.0287235	1.0	By_ingredient
SMTT04202	ADIPOR2	12	Adiponectin Receptor 2		ENSG00000006831	Q86V24	0.0115834	0.0287235	1.0	By_ingredient
SMTT04217	DGAT2	11	Diacylglycerol O-acyltransferase 2		ENSG00000062282	Q96PD7	0.0115834	0.0287235	1.0	By_ingredient
SMTT04236	CRTC2	1	CREB Regulated Transcription Coactivator 2		ENSG00000160741	Q53ET0	0.0115834	0.0287235	1.0	By_ingredient
SMTT04237	PLB1	2	Phospholipase B1		ENSG00000163803	Q6P1J6	0.387287	0.41885	1.0	By_ingredient
SMTT04245	GUSBP1	5	Glucuronidase, Beta Pseudogene 1		ENSG00000183666	Q15486	0.034351	0.0557104	1.0	By_ingredient
SMTT04252	FRAP1		Serine/threonine-protein Kinase MTOR/mechanistic target of rapamycin kinase			P42345	0.000397705	0.00379581	1.0	By_ingredient
SMTT04258	PRXC1A		Peroxidase C1A			P00433	0.034351	0.0557104	1.0	By_ingredient
SMTT04266	CDC2		Cell Division Control Protein 2 Homolog/cyclin dependent kinase 1			P06493	1.89e-05	0.000446	1.0	By_ingredient
SMTT04268	MAC1		Metal-binding Activator 1			P35192	0.0115834	0.0287235	1.0	By_ingredient
