# Supplementary material for: A Network Pharmacology-Based Study on Irritable Bowel Syndrome Prevention and Treatment Utilizing Shenling Baizhu Powder
Source: Biomed Res Int. 2021 Nov 23;2021:4579850. doi: 10.1155/2021/4579850 (PMC8632384; doi:10.1155/2021/4579850)
Supplement: Supplementary Materials — Please find detailed data in the supplementary file, including the original data of SymMap, metabolomics, and molecular docking of Shenling Baizhu powder. “Shenling Baizhu powder SymMap” includes all herbal targets and combined targets. “Shenling Baizhu powder metabolomics” includes two-dimensional structural data analysis. “Molecular docking” involves molecule-target docking and the results. [file 4579850.f1.zip › Data in brief/1. Shenling Baizhu powder Symmap/Lotus seed.csv]

Target id	Gene symbol	Chromosome	Gene name	Protein name	Ensembl id	UniProt id	P_value	FDR(BH)	FDR(Bonferroni)	Relationship
SMTT00032	ABCG2		ATP-binding cassette, sub-family G (WHITE), member 2	ATP-binding Cassette Sub-family G Member 2		Q9UNQ0	0.0137005	0.0317324	1.0	By_ingredient
SMTT00038	ACACA	17	Acetyl-CoA Carboxylase Alpha	Acetyl-CoA Carboxylase 1	ENSG00000278540	Q13085	0.0114299	0.0285676	1.0	By_ingredient
SMTT00051	ACHE		acetylcholinesterase (Yt blood group)	Acetylcholinesterase		P22303	0.117143	0.142689	1.0	By_ingredient
SMTT00056	ACPP		acid phosphatase, prostate	Prostatic Acid Phosphatase		P15309	0.015966	0.0343843	1.0	By_ingredient
SMTT00089	ADCY2		adenylate cyclase 2 (brain)	Adenylate Cyclase Type 2		Q08462	0.00229627	0.0127743	1.0	By_ingredient
SMTT00102	ADRA1A		adrenergic, alpha-1A-, receptor	Alpha-1A Adrenergic Receptor		P35348	0.00120518	0.00830775	1.0	By_ingredient
SMTT00103	ADRA2A		adrenergic, alpha-2A-, receptor	Alpha-2A Adrenergic Receptor		P08913	0.138334	0.164248	1.0	By_ingredient
SMTT00105	ADRB1		adrenergic, beta-1-, receptor	Beta-1 Adrenergic Receptor		P08588	0.00975978	0.0264223	1.0	By_ingredient
SMTT00106	ADRB2		adrenergic, beta-2-, receptor, surface	Beta-2 Adrenergic Receptor		P07550	2.74e-05	0.000586	1.0	By_ingredient
SMTT00129	AHR		Aryl hydrocarbon receptor	Aryl Hydrocarbon Receptor		P35869	0.0361279	0.0575949	1.0	By_ingredient
SMTT00139	AKR1B1		Aldo-keto reductase family 1, member B1 (aldose reductase)	Aldose Reductase		P15121	0.174041	0.200888	1.0	By_ingredient
SMTT00144	AKT1	14	AKT Serine/threonine Kinase 1	RAC-alpha Serine/threonine-protein Kinase	ENSG00000142208	P31749	0.003439	0.0159628	1.0	By_ingredient
SMTT00175	ALOX5		arachidonate 5-lipoxygenase	Arachidonate 5-lipoxygenase		P09917	0.00215293	0.0122522	1.0	By_ingredient
SMTT00238	APP	21	Amyloid Beta Precursor Protein	Amyloid Beta A4 Protein	ENSG00000142192	P05067	0.0272174	0.0477668	1.0	By_ingredient
SMTT00244	AR	X	Androgen Receptor	Androgen Receptor	ENSG00000169083	P10275	0.000798828	0.00617947	1.0	By_ingredient
SMTT00361	BCL2	18	BCL2, Apoptosis Regulator	Apoptosis Regulator Bcl-2	ENSG00000171791	P10415	0.021314	0.0407955	1.0	By_ingredient
SMTT00362	BCL2L1		BCL2 like 1	Bcl-2-like Protein 1		Q07817	0.00244768	0.0132061	1.0	By_ingredient
SMTT00380	BIRC5		Baculoviral IAP repeat containing 5	Baculoviral IAP Repeat-containing Protein 5		O15392	0.000685993	0.00551816	1.0	By_ingredient
SMTT00389	BMP2	20	Bone Morphogenetic Protein 2		ENSG00000125845		0.0137005	0.0317324	1.0	By_ingredient
SMTT00461	CALM3	19	Calmodulin 3		ENSG00000160014		0.1283	0.154075	1.0	By_ingredient
SMTT00480	CASP3		Caspase 3	Caspase-3		P42574	0.0329406	0.0539957	1.0	By_ingredient
SMTT00481	CASP7		Caspase 7	Caspase-7		P55210	0.0182264	0.037149	1.0	By_ingredient
SMTT00482	CASP8	2	Caspase 8	Caspase-8	ENSG00000064012	Q14790	0.0666905	0.0901419	1.0	By_ingredient
SMTT00487	CAT	11	Catalase	Catalase	ENSG00000121691	P04040	0.0061203	0.0208847	1.0	By_ingredient
SMTT00490	CAV1	7	Caveolin 1		ENSG00000105974		0.0182264	0.037149	1.0	By_ingredient
SMTT00516	CCL2		C-C motif chemokine ligand 2	C-C Motif Chemokine 2		P13500	0.0449586	0.0671915	1.0	By_ingredient
SMTT00520	CCNA2		cyclin A2	Cyclin-A2		P20248	0.542262	0.574126	1.0	By_ingredient
SMTT00521	CCND1	11	Cyclin D1	G1/S-specific Cyclin-D1	ENSG00000110092	P24385	0.00458749	0.0182643	1.0	By_ingredient
SMTT00547	CD40LG	X	CD40 Ligand	CD40 Ligand	ENSG00000102245	P29965	5.13e-05	0.000921	1.0	By_ingredient
SMTT00569	CDK2		cyclin dependent kinase 2	Cyclin-dependent Kinase 2		P24941	0.277484	0.307045	1.0	By_ingredient
SMTT00570	CDK4	12	Cyclin Dependent Kinase 4	Cyclin-dependent Kinase 4	ENSG00000135446	P11802	0.0666905	0.0901419	1.0	By_ingredient
SMTT00577	CDKN1A	6	Cyclin Dependent Kinase Inhibitor 1A	Cyclin-dependent Kinase Inhibitor 1	ENSG00000124762	P38936	0.00479388	0.0186651	1.0	By_ingredient
SMTT00580	CDKN2A	9	Cyclin Dependent Kinase Inhibitor 2A		ENSG00000147889		0.0137005	0.0317324	1.0	By_ingredient
SMTT00628	CHEK2	22	Checkpoint Kinase 2	Serine/threonine-protein Kinase Chk2	ENSG00000183765	O96017	0.00687335	0.0223202	1.0	By_ingredient
SMTT00636	CHRM1		cholinergic receptor muscarinic 1	Muscarinic Acetylcholine Receptor M1		P11229	0.00108129	0.00767834	1.0	By_ingredient
SMTT00654	CHUK	10	Conserved Helix-loop-helix Ubiquitous Kinase	Inhibitor Of Nuclear Factor Kappa-B Kinase Subunit Alpha	ENSG00000213341	O15111	0.0114299	0.0285676	1.0	By_ingredient
SMTT00721	COL1A1	17	Collagen Type I Alpha 1 Chain	Collagen Alpha-1(I) Chain	ENSG00000108821	P02452	0.0294526	0.0503154	1.0	By_ingredient
SMTT00726	COL3A1	2	Collagen Type III Alpha 1 Chain	Collagen Alpha-1(III) Chain	ENSG00000168542	P02461	0.015966	0.0343843	1.0	By_ingredient
SMTT00793	CRP		C-reactive protein	C-reactive Protein		P02741	0.00915419	0.0256322	1.0	By_ingredient
SMTT00838	CTSD	11	Cathepsin D	Cathepsin D	ENSG00000117984	P07339	0.281035	0.310648	1.0	By_ingredient
SMTT00849	CXCL10		C-X-C motif chemokine ligand 10	C-X-C Motif Chemokine 10		P02778	0.00229627	0.0127743	1.0	By_ingredient
SMTT00851	CXCL8		C-X-C motif chemokine ligand 8	Interleukin-8		P10145	0.0623832	0.0856255	1.0	By_ingredient
SMTT00865	CYP1A1		cytochrome P450 family 1 subfamily A member 1	Cytochrome P450 1A1		P04798	0.0602222	0.0834134	1.0	By_ingredient
SMTT00866	CYP1A2		cytochrome P450 family 1 subfamily A member 2	Cytochrome P450 1A2		P05177	0.0405532	0.0623721	1.0	By_ingredient
SMTT00867	CYP1B1	2	Cytochrome P450 Family 1 Subfamily B Member 1	Cytochrome P450 1B1	ENSG00000138061	Q16678	0.0137005	0.0317324	1.0	By_ingredient
SMTT00883	CYP3A4		cytochrome P450 family 3 subfamily A member 4	Cytochrome P450 3A4		P08684	0.068837	0.0924563	1.0	By_ingredient
SMTT00917	DDC	7	Dopa Decarboxylase	Aromatic-L-amino-acid Decarboxylase	ENSG00000132437	P20711	0.00229627	0.0127743	1.0	By_ingredient
SMTT01019	DRD2	11	Dopamine Receptor D2	D(2) Dopamine Receptor	ENSG00000149295	P14416	6.34e-07	3.44e-05	0.0560329	By_ingredient
SMTT01020	DRD3		Dopamine Receptor D3	D(3) Dopamine Receptor		P35462	0.00187628	0.0111841	1.0	By_ingredient
SMTT01021	DRD5		Dopamine Receptor D5	D(1B) Dopamine Receptor		P21918	0.00479388	0.0186651	1.0	By_ingredient
SMTT01033	DUOX2	15	Dual Oxidase 2		ENSG00000140279		0.000229317	0.00260602	1.0	By_ingredient
SMTT01069	EGF	4	Epidermal Growth Factor	Pro-epidermal Growth Factor	ENSG00000138798	P01133	0.0182264	0.037149	1.0	By_ingredient
SMTT01070	EGFR	7	Epidermal Growth Factor Receptor	Epidermal Growth Factor Receptor	ENSG00000146648	P00533	0.00126502	0.00860612	1.0	By_ingredient
SMTT01084	EIF6		eukaryotic translation initiation factor 6	Eukaryotic Translation Initiation Factor 6		P56537	0.0645393	0.0877792	1.0	By_ingredient
SMTT01124	ERBB2	17	Erb-b2 Receptor Tyrosine Kinase 2	Receptor Tyrosine-protein Kinase ErbB-2	ENSG00000141736	P04626	7.69e-05	0.00122	1.0	By_ingredient
SMTT01125	ERBB3	12	Erb-b2 Receptor Tyrosine Kinase 3		ENSG00000065361		0.00229627	0.0127743	1.0	By_ingredient
SMTT01141	ESR1	6	Estrogen Receptor 1	Estrogen Receptor	ENSG00000091831	P03372	0.125508	0.151203	1.0	By_ingredient
SMTT01142	ESR2		estrogen receptor 2	Estrogen Receptor Beta		Q92731	0.19847	0.226032	1.0	By_ingredient
SMTT01170	F3		coagulation factor III, tissue factor	Tissue Factor		P13726	0.0339078	0.0551607	1.0	By_ingredient
SMTT01272	FOS	14	Fos Proto-oncogene, AP-1 Transcription Factor Subunit	Proto-oncogene C-Fos	ENSG00000170345	P01100	0.0942205	0.118921	1.0	By_ingredient
SMTT01380	GJA1	6	Gap Junction Protein Alpha 1	Gap Junction Alpha-1 Protein	ENSG00000152661	P17302	0.0316827	0.0526158	1.0	By_ingredient
SMTT01483	GSK3B		glycogen synthase kinase 3 beta	Glycogen Synthase Kinase-3 Beta		P49841	0.566252	0.597578	1.0	By_ingredient
SMTT01489	GSTM1		glutathione S-transferase mu 1	Glutathione S-transferase Mu 1		P09488	0.0249773	0.0450922	1.0	By_ingredient
SMTT01490	GSTM2		glutathione S-transferase mu 2	Glutathione S-transferase Mu 2		P28161	0.0114299	0.0285676	1.0	By_ingredient
SMTT01491	GSTP1		glutathione S-transferase pi 1	Glutathione S-transferase P		P09211	3.56e-05	0.000708	1.0	By_ingredient
SMTT01550	HIF1A		hypoxia inducible factor 1 subunit alpha	Hypoxia-inducible Factor 1-alpha		Q16665	0.0493442	0.0717453	1.0	By_ingredient
SMTT01567	HMGCR		3-hydroxy-3-methylglutaryl-CoA reductase	3-hydroxy-3-methylglutaryl-coenzyme A Reductase		P04035	0.0316827	0.0526158	1.0	By_ingredient
SMTT01569	HMOX1	22	Heme Oxygenase 1	Heme Oxygenase 1	ENSG00000100292	P09601	0.00174481	0.0107142	1.0	By_ingredient
SMTT01614	HSF1		heat shock transcription factor 1	Heat Shock Factor Protein 1		Q00613	0.00687335	0.0223202	1.0	By_ingredient
SMTT01618	HSPA5		heat shock protein family A (Hsp70) member 5	Endoplasmic reticulum chaperone BiP		P11021	0.0182264	0.037149	1.0	By_ingredient
SMTT01620	HSPB1	7	Heat Shock Protein Family B (small) Member 1	Heat Shock Protein Beta-1	ENSG00000106211	P04792	0.0114299	0.0285676	1.0	By_ingredient
SMTT01628	HTR3A		6-hydroxytryptamine receptor 3A	5-hydroxytryptamine Receptor 3A		P46098	0.000882702	0.00666363	1.0	By_ingredient
SMTT01638	ICAM1		intercellular adhesion molecule 1	Intercellular Adhesion Molecule 1		P05362	0.00276039	0.0141232	1.0	By_ingredient
SMTT01652	IFNG		interferon gamma	Interferon Gamma		P01579	0.001378	0.00909701	1.0	By_ingredient
SMTT01665	IGF2	11	Insulin Like Growth Factor 2		ENSG00000167244		0.00915419	0.0256322	1.0	By_ingredient
SMTT01668	IGFBP3		insulin like growth factor binding protein 3	Insulin-like Growth Factor-binding Protein 3		P17936	0.00687335	0.0223202	1.0	By_ingredient
SMTT01682	IL10	1	Interleukin 10	Interleukin-10	ENSG00000136634	P22301	0.000954182	0.00701177	1.0	By_ingredient
SMTT01696	IL1A		interleukin 1 alpha	Interleukin-1 Alpha		P01583	0.015966	0.0343843	1.0	By_ingredient
SMTT01697	IL1B		interleukin 1 beta	Interleukin-1 Beta		P01584	0.00479388	0.0186651	1.0	By_ingredient
SMTT01700	IL2		interleukin 2	Interleukin-2		P60568	0.001378	0.00909701	1.0	By_ingredient
SMTT01710	IL4		interleukin 4	Interleukin-4		P05112	0.0623832	0.0856255	1.0	By_ingredient
SMTT01712	IL6	7	Interleukin 6	Interleukin-6	ENSG00000136244	P05231	0.000288042	0.00305718	1.0	By_ingredient
SMTT01724	INS	11	Insulin	Insulin	ENSG00000254647	P01308	0.022732	0.0425341	1.0	By_ingredient
SMTT01726	INSR	19	Insulin Receptor	Insulin Receptor	ENSG00000171105	P06213	7.69e-05	0.00122	1.0	By_ingredient
SMTT01732	IRF1	5	Interferon Regulatory Factor 1		ENSG00000125347		0.00458738	0.0182643	1.0	By_ingredient
SMTT01756	ITGB2	21	Integrin Subunit Beta 2	Integrin Beta-2	ENSG00000160255	P05107	0.00687335	0.0223202	1.0	By_ingredient
SMTT01778	JUN		Jun proto-oncogene, AP-1 transcription factor subunit	Transcription Factor AP-1		P05412	0.000510843	0.00449729	1.0	By_ingredient
SMTT01803	KCNH2	7	Potassium Voltage-gated Channel Subfamily H Member 2	Potassium Voltage-gated Channel Subfamily H Member 2	ENSG00000055118	Q12809	0.0171593	0.0359582	1.0	By_ingredient
SMTT02025	MAOB		monoamine oxidase B	Amine Oxidase [flavin-containing] B		P27338	0.0179913	0.0369071	1.0	By_ingredient
SMTT02027	MAP2		microtubule associated protein 2	Microtubule-associated Protein 2		P11137	0.00915419	0.0256322	1.0	By_ingredient
SMTT02033	MAPK1	22	Mitogen-activated Protein Kinase 1	Mitogen-activated Protein Kinase 1	ENSG00000100030	P28482	0.00399387	0.0169253	1.0	By_ingredient
SMTT02037	MAPK3		Mitogen-activated Protein Kinase 3	Mitogen-activated Protein Kinase 3		P27361	0.00201233	0.0117517	1.0	By_ingredient
SMTT02062	MCL1		MCL1, BCL2 family apoptosis regulator	Induced Myeloid Leukemia Cell Differentiation Protein Mcl-1		Q07820	0.022732	0.0425341	1.0	By_ingredient
SMTT02070	MDM2	12	MDM2 Proto-oncogene	E3 Ubiquitin-protein Ligase Mdm2	ENSG00000135679	Q00987	0.0137005	0.0317324	1.0	By_ingredient
SMTT02088	MET	7	MET Proto-oncogene, Receptor Tyrosine Kinase	Hepatocyte Growth Factor Receptor	ENSG00000105976	P08581	0.015966	0.0343843	1.0	By_ingredient
SMTT02095	MGAM		maltase-glucoamylase	Maltase-glucoamylase, Intestinal		O43451	0.0249773	0.0450922	1.0	By_ingredient
SMTT02132	MMP1	11	Matrix Metallopeptidase 1	Interstitial Collagenase	ENSG00000196611	P03956	0.001378	0.00909701	1.0	By_ingredient
SMTT02137	MMP2	16	Matrix Metallopeptidase 2	72 KDa Type IV Collagenase	ENSG00000087245	P08253	0.003439	0.0159628	1.0	By_ingredient
SMTT02140	MMP3		Matrix Metallopeptidase 3	Stromelysin-1		P08254	0.0339078	0.0551607	1.0	By_ingredient
SMTT02143	MMP9	20	Matrix Metallopeptidase 9	Matrix Metalloproteinase-9	ENSG00000100985	P14780	0.00438534	0.0178239	1.0	By_ingredient
SMTT02157	MPO	17	Myeloperoxidase	Myeloperoxidase	ENSG00000005381	P05164	0.0449586	0.0671915	1.0	By_ingredient
SMTT02203	MYC	8	MYC Proto-oncogene, BHLH Transcription Factor	Myc Proto-oncogene Protein	ENSG00000136997	P01106	0.0580564	0.0811062	1.0	By_ingredient
SMTT02248	NCF1	7	Neutrophil Cytosolic Factor 1	Neutrophil Cytosol Factor 1	ENSG00000158517	P14598	7.69e-05	0.00122	1.0	By_ingredient
SMTT02314	NFKBIA	14	NFKB Inhibitor Alpha	NF-kappa-B Inhibitor Alpha	ENSG00000100906	P25963	0.00276039	0.0141232	1.0	By_ingredient
SMTT02349	NOS2		nitric oxide synthase 2	Nitric Oxide Synthase, Inducible		P35228	0.0699644	0.0936859	1.0	By_ingredient
SMTT02350	NOS3		nitric oxide synthase 3	Nitric Oxide Synthase, Endothelial		P29474	0.0449586	0.0671915	1.0	By_ingredient
SMTT02358	NPEPPS		aminopeptidase puromycin sensitive	Puromycin-sensitive Aminopeptidase		P55786	0.00687335	0.0223202	1.0	By_ingredient
SMTT02368	NQO1		NAD(P)H quinone dehydrogenase 1	NAD(P)H Dehydrogenase [quinone] 1		P15559	0.0204818	0.0398595	1.0	By_ingredient
SMTT02374	NR1I2		nuclear receptor subfamily 1 group I member 2	Nuclear Receptor Subfamily 1 Group I Member 2		O75469	0.0558857	0.0788187	1.0	By_ingredient
SMTT02375	NR1I3		nuclear receptor subfamily 1 group I member 3	Nuclear Receptor Subfamily 1 Group I Member 3		Q14994	0.00915419	0.0256322	1.0	By_ingredient
SMTT02379	NR3C1	5	Nuclear Receptor Subfamily 3 Group C Member 1	Glucocorticoid Receptor	ENSG00000113580	P04150	0.479513	0.511686	1.0	By_ingredient
SMTT02380	NR3C2	4	Nuclear Receptor Subfamily 3 Group C Member 2	Mineralocorticoid Receptor	ENSG00000151623	P08235	0.524814	0.556793	1.0	By_ingredient
SMTT02417	ODC1		ornithine decarboxylase 1	Ornithine Decarboxylase		P11926	0.0361279	0.0575949	1.0	By_ingredient
SMTT02428	OPRD1		opioid receptor delta 1	Delta-type Opioid Receptor		P41143	1.52e-06	6.74e-05	0.134338	By_ingredient
SMTT02429	OPRK1		opioid receptor kappa 1	Kappa-type Opioid Receptor		P41145	0.0204818	0.0398595	1.0	By_ingredient
SMTT02430	OPRM1		opioid receptor mu 1	Mu-type Opioid Receptor		P35372	8.21e-06	0.000243	0.7256	By_ingredient
SMTT02471	PARP1		poly(ADP-ribose) polymerase 1	Poly [ADP-ribose] Polymerase 1		P09874	0.0182264	0.037149	1.0	By_ingredient
SMTT02490	PCNA	20	Proliferating Cell Nuclear Antigen	Proliferating Cell Nuclear Antigen	ENSG00000132646	P12004	0.0182264	0.037149	1.0	By_ingredient
SMTT02550	PGR	11	Progesterone Receptor	Progesterone Receptor	ENSG00000082175	P06401	0.570297	0.60148	1.0	By_ingredient
SMTT02603	PLAT	8	Plasminogen Activator, Tissue Type	Tissue-type Plasminogen Activator	ENSG00000104368	P00750	0.0316827	0.0526158	1.0	By_ingredient
SMTT02604	PLAU	10	Plasminogen Activator, Urokinase	Urokinase-type Plasminogen Activator	ENSG00000122861	P00749	0.068837	0.0924563	1.0	By_ingredient
SMTT02668	PON1	7	Paraoxonase 1	Serum Paraoxonase/arylesterase 1	ENSG00000005421	P27169	0.000183722	0.0022347	1.0	By_ingredient
SMTT02671	POR	7	Cytochrome P450 Oxidoreductase	NADPH--cytochrome P450 Reductase	ENSG00000127948	P16435	0.000107485	0.00153469	1.0	By_ingredient
SMTT02679	PPARA		peroxisome proliferator activated receptor alpha	Peroxisome Proliferator-activated Receptor Alpha		Q07869	0.0316827	0.0526158	1.0	By_ingredient
SMTT02680	PPARD		peroxisome proliferator activated receptor delta	Peroxisome Proliferator-activated Receptor Delta		Q03181	0.00458738	0.0182643	1.0	By_ingredient
SMTT02681	PPARG	3	Peroxisome Proliferator Activated Receptor Gamma	Peroxisome Proliferator-activated Receptor Gamma	ENSG00000132170	P37231	0.00215293	0.0122522	1.0	By_ingredient
SMTT02717	PRKCA		protein kinase C alpha	Protein Kinase C Alpha Type		P17252	0.0204818	0.0398595	1.0	By_ingredient
SMTT02718	PRKCB		protein kinase C beta	Protein Kinase C Beta Type		P05771	0.0623832	0.0856255	1.0	By_ingredient
SMTT02747	PRSS1	7	Serine Protease 1	Trypsin-1	ENSG00000204983	P07477	0.101275	0.12627	1.0	By_ingredient
SMTT02769	PTEN	10	Phosphatase And Tensin Homolog	Phosphatidylinositol 3,4,5-trisphosphate 3-phosphatase And Dual-specificity Protein Phosphatase PTEN	ENSG00000171862	P60484	0.0182264	0.037149	1.0	By_ingredient
SMTT02772	PTGER3		prostaglandin E receptor 3	Prostaglandin E2 Receptor EP3 Subtype		P43115	0.0182264	0.037149	1.0	By_ingredient
SMTT02776	PTGS1		prostaglandin-endoperoxide synthase 1	Prostaglandin G/H Synthase 1		P23219	7.78e-06	0.000234	0.687596	By_ingredient
SMTT02777	PTGS2		prostaglandin-endoperoxide synthase 2	Prostaglandin G/H Synthase 2		P35354	0.00158138	0.00998401	1.0	By_ingredient
SMTT02824	RAF1	3	Raf-1 Proto-oncogene, Serine/threonine Kinase	RAF Proto-oncogene Serine/threonine-protein Kinase	ENSG00000132155	P04049	0.015966	0.0343843	1.0	By_ingredient
SMTT02836	RASA1	5	RAS P21 Protein Activator 1		ENSG00000145715		0.00229627	0.0127743	1.0	By_ingredient
SMTT02839	RASSF1	3	Ras Association Domain Family Member 1		ENSG00000068028		0.00229627	0.0127743	1.0	By_ingredient
SMTT02842	RB1	13	RB Transcriptional Corepressor 1	Retinoblastoma-associated Protein	ENSG00000139687	P06400	0.00033535	0.00338723	1.0	By_ingredient
SMTT02865	RELA		RELA proto-oncogene, NF-kB subunit	Transcription Factor P65		Q04206	0.0282251	0.0489285	1.0	By_ingredient
SMTT02967	RUNX2	6	Runt Related Transcription Factor 2		ENSG00000124813		0.00458738	0.0182643	1.0	By_ingredient
SMTT02969	RXRA		retinoid X receptor alpha	Retinoic Acid Receptor RXR-alpha		P19793	7.48e-06	0.000227	0.661082	By_ingredient
SMTT02970	RXRB		retinoid X receptor beta	Retinoic Acid Receptor RXR-beta		P28702	0.106657	0.131859	1.0	By_ingredient
SMTT03005	SCN5A	3	Sodium Voltage-gated Channel Alpha Subunit 5	Sodium Channel Protein Type 5 Subunit Alpha	ENSG00000183873	Q14524	4.02e-06	0.000141	0.355288	By_ingredient
SMTT03028	SELE		selectin E	E-selectin		P16581	0.0361279	0.0575949	1.0	By_ingredient
SMTT03048	SERPINE1	7	Serpin Family E Member 1	Plasminogen Activator Inhibitor 1	ENSG00000106366	P05121	0.022732	0.0425341	1.0	By_ingredient
SMTT03193	SLC6A2	16	Solute Carrier Family 6 Member 2	Sodium-dependent Noradrenaline Transporter	ENSG00000103546	P23975	0.00420784	0.0174514	1.0	By_ingredient
SMTT03195	SLC6A3	5	Solute Carrier Family 6 Member 3	Sodium-dependent Dopamine Transporter	ENSG00000142319	Q01959	0.00265923	0.0138444	1.0	By_ingredient
SMTT03196	SLC6A4		solute carrier family 6 member 4	Sodium-dependent Serotonin Transporter		P31645	5.78e-07	3.2e-05	0.0510836	By_ingredient
SMTT03256	SOD1	21	Superoxide Dismutase 1	Superoxide Dismutase [Cu-Zn]	ENSG00000142168	P00441	0.000140294	0.00185007	1.0	By_ingredient
SMTT03317	STAT1	2	Signal Transducer And Activator Of Transcription 1		ENSG00000115415		0.0204818	0.0398595	1.0	By_ingredient
SMTT03347	SULT1E1		sulfotransferase family 1E member 1	Estrogen Sulfotransferase		P49888	0.0114299	0.0285676	1.0	By_ingredient
SMTT03408	TBXA2R		thromboxane A2 receptor	Thromboxane A2 Receptor		P21731	0.00458738	0.0182643	1.0	By_ingredient
SMTT03447	TGFB1	19	Transforming Growth Factor Beta 1	Transforming Growth Factor Beta-1	ENSG00000105329	P01137	0.0580564	0.0811062	1.0	By_ingredient
SMTT03459	TH	11	Tyrosine Hydroxylase	Tyrosine 3-monooxygenase	ENSG00000180176	P07101	0.0316827	0.0526158	1.0	By_ingredient
SMTT03461	THBD	20	Thrombomodulin	Thrombomodulin	ENSG00000178726	P07204	0.00458738	0.0182643	1.0	By_ingredient
SMTT03502	TNF		tumor necrosis factor	Tumor Necrosis Factor		P01375	0.00282504	0.0143575	1.0	By_ingredient
SMTT03526	TOP1		DNA topoisomerase I	DNA Topoisomerase 1		P11387	0.000143104	0.00187538	1.0	By_ingredient
SMTT03527	TOP2A	17	DNA Topoisomerase II Alpha	DNA Topoisomerase 2-alpha	ENSG00000131747	P11388	1.54e-05	0.000383	1.0	By_ingredient
SMTT03530	TP53	17	Tumor Protein P53	Cellular Tumor Antigen P53	ENSG00000141510	P04637	0.00588884	0.0205211	1.0	By_ingredient
SMTT03648	TYR	11	Tyrosinase	Tyrosinase	ENSG00000077498	P14679	0.0294526	0.0503154	1.0	By_ingredient
SMTT03701	VCAM1		vascular cell adhesion molecule 1	Vascular Cell Adhesion Protein 1		P19320	0.0645393	0.0877792	1.0	By_ingredient
SMTT03708	VEGFA		vascular endothelial growth factor A	Vascular Endothelial Growth Factor A		P15692	0.00708703	0.0226234	1.0	By_ingredient
SMTT03764	XDH	2	Xanthine Dehydrogenase	Xanthine Dehydrogenase/oxidase	ENSG00000158125	P47989	0.00458749	0.0182643	1.0	By_ingredient
SMTT03765	XIAP	X	X-linked Inhibitor Of Apoptosis	E3 Ubiquitin-protein Ligase XIAP	ENSG00000101966	P98170	0.0204818	0.0398595	1.0	By_ingredient
SMTT03845	CCNB1	5	Cyclin B1		ENSG00000134057	P14635	0.00105308	0.00753371	1.0	By_ingredient
SMTT03857	ELK1	X	ELK1, ETS Transcription Factor		ENSG00000126767	P19419	0.00915419	0.0256322	1.0	By_ingredient
SMTT03877	BAX	19	BCL2 Associated X, Apoptosis Regulator		ENSG00000087088	Q07812	0.139011	0.164917	1.0	By_ingredient
SMTT03893	DIO1	1	Iodothyronine Deiodinase 1		ENSG00000211452	P49895	0.0137005	0.0317324	1.0	By_ingredient
SMTT03908	E2F1	20	E2F Transcription Factor 1		ENSG00000101412	Q01094	0.0114299	0.0285676	1.0	By_ingredient
SMTT03909	E2F2	1	E2F Transcription Factor 2		ENSG00000007968	Q14209	0.00229627	0.0127743	1.0	By_ingredient
SMTT03915	CLDN4	7	Claudin 4		ENSG00000189143	O14493	0.00229627	0.0127743	1.0	By_ingredient
SMTT03918	CASP9	1	Caspase 9		ENSG00000132906	P55211	0.00479388	0.0186651	1.0	By_ingredient
SMTT03920	RUNX1T1	8	RUNX1 Translocation Partner 1		ENSG00000079102	Q06455	0.015966	0.0343843	1.0	By_ingredient
SMTT03927	HAS2	8	Hyaluronan Synthase 2		ENSG00000170961	Q92819	0.0137005	0.0317324	1.0	By_ingredient
SMTT03935	HK2	2	Hexokinase 2		ENSG00000159399	P52789	0.00229627	0.0127743	1.0	By_ingredient
SMTT03972	CXCL2	4	C-X-C Motif Chemokine Ligand 2		ENSG00000081041	P19875	0.00458738	0.0182643	1.0	By_ingredient
SMTT03990	NFE2L2	2	Nuclear Factor, Erythroid 2 Like 2		ENSG00000116044	Q16236	0.0204818	0.0398595	1.0	By_ingredient
SMTT04001	NKX3-1	8	NK3 Homeobox 1		ENSG00000167034	Q99801	0.00458738	0.0182643	1.0	By_ingredient
SMTT04010	CXCL11	4	C-X-C Motif Chemokine Ligand 11		ENSG00000169248	O14625	0.00229627	0.0127743	1.0	By_ingredient
SMTT04037	PCOLCE	7	Procollagen C-endopeptidase Enhancer		ENSG00000106333	Q15113	0.0114299	0.0285676	1.0	By_ingredient
SMTT04055	PSMD3	17	Proteasome 26S Subunit, Non-ATPase 3		ENSG00000108344	O43242	0.0114299	0.0285676	1.0	By_ingredient
SMTT04074	SLC2A4	17	Solute Carrier Family 2 Member 4		ENSG00000181856	P14672	0.000461026	0.00419365	1.0	By_ingredient
SMTT04090	SOD3	4	Superoxide Dismutase 3		ENSG00000109610	P08294	0.0114299	0.0285676	1.0	By_ingredient
SMTT04094	SPP1	4	Secreted Phosphoprotein 1		ENSG00000118785	P10451	0.0137005	0.0317324	1.0	By_ingredient
SMTT04106	AHSA1	14	Activator Of HSP90 ATPase Activity 1		ENSG00000100591	O95433	0.0537101	0.0764999	1.0	By_ingredient
SMTT04114	DCAF5	14	DDB1 And CUL4 Associated Factor 5		ENSG00000139990	Q96JK2	0.00229627	0.0127743	1.0	By_ingredient
SMTT04127	PTGES	9	Prostaglandin E Synthase		ENSG00000148344	O14684	0.00915419	0.0256322	1.0	By_ingredient
SMTT04177	HERC5	4	HECT And RLD Domain Containing E3 Ubiquitin Protein Ligase 5		ENSG00000138646	Q9UII4	0.038343	0.0600797	1.0	By_ingredient
SMTT04215	NUF2	1	NUF2, NDC80 Kinetochore Complex Component		ENSG00000143228	Q9BZD4	0.00458738	0.0182643	1.0	By_ingredient
SMTT04258	PRXC1A		Peroxidase C1A			P00433	0.00687335	0.0223202	1.0	By_ingredient
SMTT04260	gyrB		DNA Gyrase Subunit B			P0AES6	0.00458738	0.0182643	1.0	By_ingredient
SMTT04266	CDC2		Cell Division Control Protein 2 Homolog/cyclin dependent kinase 1			P06493	0.0645393	0.0877792	1.0	By_ingredient
