# Supplementary material for: A Network Pharmacology-Based Study on Irritable Bowel Syndrome Prevention and Treatment Utilizing Shenling Baizhu Powder
Source: Biomed Res Int. 2021 Nov 23;2021:4579850. doi: 10.1155/2021/4579850 (PMC8632384; doi:10.1155/2021/4579850)
Supplement: Supplementary Materials — Please find detailed data in the supplementary file, including the original data of SymMap, metabolomics, and molecular docking of Shenling Baizhu powder. “Shenling Baizhu powder SymMap” includes all herbal targets and combined targets. “Shenling Baizhu powder metabolomics” includes two-dimensional structural data analysis. “Molecular docking” involves molecule-target docking and the results. [file 4579850.f1.zip › Data in brief/1. Shenling Baizhu powder Symmap/Platycodon grandiflorum.csv]

Target id	Gene symbol	Chromosome	Gene name	Protein name	Ensembl id	UniProt id	P_value	FDR(BH)	FDR(Bonferroni)	Relationship
SMTT00010	ABAT	16	4-aminobutyrate Aminotransferase	4-aminobutyrate Aminotransferase, Mitochondrial	ENSG00000183044	P80404	0.0210654	0.040563	1.0	By_ingredient
SMTT00022	ABCC1		ATP-binding cassette, sub-family C (CFTR/MRP), member 1	Multidrug Resistance-associated Protein 1		P33527	0.01841	0.0374227	1.0	By_ingredient
SMTT00089	ADCY2		adenylate cyclase 2 (brain)	Adenylate Cyclase Type 2		Q08462	0.00617441	0.0210068	1.0	By_ingredient
SMTT00106	ADRB2		adrenergic, beta-2-, receptor, surface	Beta-2 Adrenergic Receptor		P07550	0.992315	0.99443	1.0	By_ingredient
SMTT00139	AKR1B1		Aldo-keto reductase family 1, member B1 (aldose reductase)	Aldose Reductase		P15121	0.0932226	0.117914	1.0	By_ingredient
SMTT00140	AKR1C1		Aldo-keto reductase family 1, member C1 (dihydrodiol dehydrogenase 1; 20-alpha (3-alpha)-hydroxysteroid dehydrogenase)	Aldo-keto Reductase Family 1 Member C1		Q04828	0.01841	0.0374227	1.0	By_ingredient
SMTT00144	AKT1	14	AKT Serine/threonine Kinase 1	RAC-alpha Serine/threonine-protein Kinase	ENSG00000142208	P31749	0.0229967	0.0428653	1.0	By_ingredient
SMTT00232	APOB	2	Apolipoprotein B		ENSG00000084674		0.0304963	0.0514392	1.0	By_ingredient
SMTT00238	APP	21	Amyloid Beta Precursor Protein	Amyloid Beta A4 Protein	ENSG00000142192	P05067	0.0716473	0.0954518	1.0	By_ingredient
SMTT00244	AR	X	Androgen Receptor	Androgen Receptor	ENSG00000169083	P10275	0.639955	0.669102	1.0	By_ingredient
SMTT00287	ATM	11	ATM Serine/threonine Kinase	Serine-protein Kinase ATM	ENSG00000149311	Q13315	0.01841	0.0374227	1.0	By_ingredient
SMTT00297	ATP5B		ATP synthase F1 subunit beta	ATP Synthase Subunit Beta, Mitochondrial		P06576	0.0244717	0.0444999	1.0	By_ingredient
SMTT00341	BAD		BCL2 associated agonist of cell death	Bcl2-associated Agonist Of Cell Death		Q92934	0.0542277	0.0771129	1.0	By_ingredient
SMTT00356	BCHE		butyrylcholinesterase	Cholinesterase		P06276	0.0210756	0.0405817	1.0	By_ingredient
SMTT00361	BCL2	18	BCL2, Apoptosis Regulator	Apoptosis Regulator Bcl-2	ENSG00000171791	P10415	0.0031957	0.0152622	1.0	By_ingredient
SMTT00362	BCL2L1		BCL2 like 1	Bcl-2-like Protein 1		Q07817	0.179918	0.206914	1.0	By_ingredient
SMTT00380	BIRC5		Baculoviral IAP repeat containing 5	Baculoviral IAP Repeat-containing Protein 5		O15392	0.0999757	0.124956	1.0	By_ingredient
SMTT00461	CALM3	19	Calmodulin 3		ENSG00000160014		0.995282	0.996907	1.0	By_ingredient
SMTT00480	CASP3		Caspase 3	Caspase-3		P42574	0.00103583	0.00743794	1.0	By_ingredient
SMTT00481	CASP7		Caspase 7	Caspase-7		P55210	0.0483494	0.0706756	1.0	By_ingredient
SMTT00482	CASP8	2	Caspase 8	Caspase-8	ENSG00000064012	Q14790	0.16968	0.19638	1.0	By_ingredient
SMTT00487	CAT	11	Catalase	Catalase	ENSG00000121691	P04040	0.0396077	0.0614135	1.0	By_ingredient
SMTT00516	CCL2		C-C motif chemokine ligand 2	C-C Motif Chemokine 2		P13500	0.11656	0.142065	1.0	By_ingredient
SMTT00521	CCND1	11	Cyclin D1	G1/S-specific Cyclin-D1	ENSG00000110092	P24385	0.0302153	0.0511155	1.0	By_ingredient
SMTT00547	CD40LG	X	CD40 Ligand	CD40 Ligand	ENSG00000102245	P29965	0.000373531	0.00363143	1.0	By_ingredient
SMTT00569	CDK2		cyclin dependent kinase 2	Cyclin-dependent Kinase 2		P24941	0.529642	0.561571	1.0	By_ingredient
SMTT00570	CDK4	12	Cyclin Dependent Kinase 4	Cyclin-dependent Kinase 4	ENSG00000135446	P11802	0.0146921	0.0330162	1.0	By_ingredient
SMTT00577	CDKN1A	6	Cyclin Dependent Kinase Inhibitor 1A	Cyclin-dependent Kinase Inhibitor 1	ENSG00000124762	P38936	0.0314952	0.0524247	1.0	By_ingredient
SMTT00611	CES1		carboxylesterase 1	Liver Carboxylesterase 1		P23141	0.00617441	0.0210068	1.0	By_ingredient
SMTT00629	CHKB	22	Choline Kinase Beta		ENSG00000100288		0.012311	0.0297294	1.0	By_ingredient
SMTT00721	COL1A1	17	Collagen Type I Alpha 1 Chain	Collagen Alpha-1(I) Chain	ENSG00000108821	P02452	0.0773829	0.101427	1.0	By_ingredient
SMTT00728	COL4A2	13	Collagen Type IV Alpha 2 Chain		ENSG00000134871		0.00617441	0.0210068	1.0	By_ingredient
SMTT00739	COL7A1	3	Collagen Type VII Alpha 1 Chain		ENSG00000114270		0.0542277	0.0771129	1.0	By_ingredient
SMTT00811	CSF2		colony stimulating factor	Granulocyte-macrophage Colony-stimulating Factor		P04141	0.0364839	0.0580083	1.0	By_ingredient
SMTT00826	CTH	1	Cystathionine Gamma-lyase	Cystathionine Gamma-lyase	ENSG00000116761	P32929	0.154086	0.180298	1.0	By_ingredient
SMTT00838	CTSD	11	Cathepsin D	Cathepsin D	ENSG00000117984	P07339	0.00194705	0.0114606	1.0	By_ingredient
SMTT00864	CYP19A1	15	Cytochrome P450 Family 19 Subfamily A Member 1	Aromatase	ENSG00000137869	P11511	0.00327766	0.0154627	1.0	By_ingredient
SMTT00865	CYP1A1		cytochrome P450 family 1 subfamily A member 1	Cytochrome P450 1A1		P04798	0.154086	0.180298	1.0	By_ingredient
SMTT00866	CYP1A2		cytochrome P450 family 1 subfamily A member 2	Cytochrome P450 1A2		P05177	0.105538	0.130673	1.0	By_ingredient
SMTT00880	CYP2E1		cytochrome P450 family 2 subfamily E member 1	Cytochrome P450 2E1		P05181	0.0658764	0.0892771	1.0	By_ingredient
SMTT00920	DDIT3	12	DNA Damage Inducible Transcript 3		ENSG00000175197		0.0304963	0.0514392	1.0	By_ingredient
SMTT01070	EGFR	7	Epidermal Growth Factor Receptor	Epidermal Growth Factor Receptor	ENSG00000146648	P00533	0.13284	0.158708	1.0	By_ingredient
SMTT01124	ERBB2	17	Erb-b2 Receptor Tyrosine Kinase 2	Receptor Tyrosine-protein Kinase ErbB-2	ENSG00000141736	P04626	0.0364839	0.0580083	1.0	By_ingredient
SMTT01141	ESR1	6	Estrogen Receptor 1	Estrogen Receptor	ENSG00000091831	P03372	0.968176	0.973818	1.0	By_ingredient
SMTT01142	ESR2		estrogen receptor 2	Estrogen Receptor Beta		Q92731	0.893307	0.906987	1.0	By_ingredient
SMTT01201	FASLG	1	Fas Ligand		ENSG00000117560		0.0483494	0.0706756	1.0	By_ingredient
SMTT01202	FASN		fatty acid synthase	Fatty Acid Synthase		P49327	0.0111542	0.0282204	1.0	By_ingredient
SMTT01348	GATM	15	Glycine Amidinotransferase	Glycine Amidinotransferase, Mitochondrial	ENSG00000171766	P50440	0.141567	0.167475	1.0	By_ingredient
SMTT01436	GOT1		glutamic-oxaloacetic transaminase 1	Aspartate Aminotransferase, Cytoplasmic		P17174	0.02772	0.0484428	1.0	By_ingredient
SMTT01456	GPT		glutamic--pyruvic transaminase	Alanine Aminotransferase 1		P24298	0.24816	0.277036	1.0	By_ingredient
SMTT01457	GPT2	16	Glutamic--pyruvic Transaminase 2	Alanine Aminotransferase 2	ENSG00000166123	Q8TD30	0.0483494	0.0706756	1.0	By_ingredient
SMTT01464	GRIA2		glutamate ionotropic receptor AMPA type subunit 2	Glutamate Receptor 2		P42262	0.829979	0.848707	1.0	By_ingredient
SMTT01485	GSR		glutathione-disulfide reductase	Glutathione Reductase, Mitochondrial		P00390	0.0658764	0.0892771	1.0	By_ingredient
SMTT01491	GSTP1		glutathione S-transferase pi 1	Glutathione S-transferase P		P09211	0.0128696	0.0305444	1.0	By_ingredient
SMTT01567	HMGCR		3-hydroxy-3-methylglutaryl-CoA reductase	3-hydroxy-3-methylglutaryl-coenzyme A Reductase		P04035	0.0830833	0.10739	1.0	By_ingredient
SMTT01569	HMOX1	22	Heme Oxygenase 1	Heme Oxygenase 1	ENSG00000100292	P09601	0.154086	0.180298	1.0	By_ingredient
SMTT01638	ICAM1		intercellular adhesion molecule 1	Intercellular Adhesion Molecule 1		P05362	0.018647	0.0377156	1.0	By_ingredient
SMTT01652	IFNG		interferon gamma	Interferon Gamma		P01579	0.00954884	0.0262107	1.0	By_ingredient
SMTT01671	IGHG1		immunoglobulin heavy constant gamma 1	Immunoglobulin heavy constant gamma 1		P01857	0.531226	0.563095	1.0	By_ingredient
SMTT01682	IL10	1	Interleukin 10	Interleukin-10	ENSG00000136634	P22301	0.000242418	0.00270278	1.0	By_ingredient
SMTT01696	IL1A		interleukin 1 alpha	Interleukin-1 Alpha		P01583	0.0424349	0.0643889	1.0	By_ingredient
SMTT01697	IL1B		interleukin 1 beta	Interleukin-1 Beta		P01584	0.243478	0.272174	1.0	By_ingredient
SMTT01700	IL2		interleukin 2	Interleukin-2		P60568	0.00954884	0.0262107	1.0	By_ingredient
SMTT01710	IL4		interleukin 4	Interleukin-4		P05112	0.159316	0.185752	1.0	By_ingredient
SMTT01712	IL6	7	Interleukin 6	Interleukin-6	ENSG00000136244	P05231	0.0469027	0.0692361	1.0	By_ingredient
SMTT01726	INSR	19	Insulin Receptor	Insulin Receptor	ENSG00000171105	P06213	0.0364839	0.0580083	1.0	By_ingredient
SMTT01778	JUN		Jun proto-oncogene, AP-1 transcription factor subunit	Transcription Factor AP-1		P05412	0.0661757	0.08959	1.0	By_ingredient
SMTT01803	KCNH2	7	Potassium Voltage-gated Channel Subfamily H Member 2	Potassium Voltage-gated Channel Subfamily H Member 2	ENSG00000055118	Q12809	0.93359	0.9434	1.0	By_ingredient
SMTT01833	KDR	4	Kinase Insert Domain Receptor	Vascular Endothelial Growth Factor Receptor 2	ENSG00000128052	P35968	0.673713	0.701593	1.0	By_ingredient
SMTT01926	LCT	2	Lactase	Lactase-phlorizin Hydrolase	ENSG00000115850	P09848	0.0943795	0.119071	1.0	By_ingredient
SMTT01929	LDLR	19	Low Density Lipoprotein Receptor	Low-density Lipoprotein Receptor	ENSG00000130164	P01130	0.0716473	0.0954518	1.0	By_ingredient
SMTT01979	LPL	8	Lipoprotein Lipase	Lipoprotein Lipase	ENSG00000175445	P06858	0.0773829	0.101427	1.0	By_ingredient
SMTT02025	MAOB		monoamine oxidase B	Amine Oxidase [flavin-containing] B		P27338	0.985147	0.988581	1.0	By_ingredient
SMTT02033	MAPK1	22	Mitogen-activated Protein Kinase 1	Mitogen-activated Protein Kinase 1	ENSG00000100030	P28482	0.0265053	0.0468668	1.0	By_ingredient
SMTT02037	MAPK3		Mitogen-activated Protein Kinase 3	Mitogen-activated Protein Kinase 3		P27361	0.0137676	0.0318546	1.0	By_ingredient
SMTT02062	MCL1		MCL1, BCL2 family apoptosis regulator	Induced Myeloid Leukemia Cell Differentiation Protein Mcl-1		Q07820	0.0600699	0.083222	1.0	By_ingredient
SMTT02070	MDM2	12	MDM2 Proto-oncogene	E3 Ubiquitin-protein Ligase Mdm2	ENSG00000135679	Q00987	0.0364839	0.0580083	1.0	By_ingredient
SMTT02088	MET	7	MET Proto-oncogene, Receptor Tyrosine Kinase	Hepatocyte Growth Factor Receptor	ENSG00000105976	P08581	0.0424349	0.0643889	1.0	By_ingredient
SMTT02130	MME		membrane metalloendopeptidase	Neprilysin		P08473	0.01841	0.0374227	1.0	By_ingredient
SMTT02132	MMP1	11	Matrix Metallopeptidase 1	Interstitial Collagenase	ENSG00000196611	P03956	0.138201	0.164114	1.0	By_ingredient
SMTT02137	MMP2	16	Matrix Metallopeptidase 2	72 KDa Type IV Collagenase	ENSG00000087245	P08253	0.209886	0.237729	1.0	By_ingredient
SMTT02143	MMP9	20	Matrix Metallopeptidase 9	Matrix Metalloproteinase-9	ENSG00000100985	P14780	0.234028	0.262536	1.0	By_ingredient
SMTT02167	MS4A1	11	Membrane Spanning 4-domains A1	B-lymphocyte Antigen CD20	ENSG00000156738	P11836	0.00617441	0.0210068	1.0	By_ingredient
SMTT02193	MTTP	4	Microsomal Triglyceride Transfer Protein	Microsomal Triglyceride Transfer Protein Large Subunit	ENSG00000138823	P55157	0.0244717	0.0444999	1.0	By_ingredient
SMTT02203	MYC	8	MYC Proto-oncogene, BHLH Transcription Factor	Myc Proto-oncogene Protein	ENSG00000136997	P01106	0.148823	0.174937	1.0	By_ingredient
SMTT02251	NCOA1		nuclear receptor coactivator 1	Nuclear Receptor Coactivator 1		Q15788	0.923182	0.934025	1.0	By_ingredient
SMTT02314	NFKBIA	14	NFKB Inhibitor Alpha	NF-kappa-B Inhibitor Alpha	ENSG00000100906	P25963	0.018647	0.0377156	1.0	By_ingredient
SMTT02349	NOS2		nitric oxide synthase 2	Nitric Oxide Synthase, Inducible		P35228	0.608943	0.638946	1.0	By_ingredient
SMTT02368	NQO1		NAD(P)H quinone dehydrogenase 1	NAD(P)H Dehydrogenase [quinone] 1		P15559	0.0542277	0.0771129	1.0	By_ingredient
SMTT02379	NR3C1	5	Nuclear Receptor Subfamily 3 Group C Member 1	Glucocorticoid Receptor	ENSG00000113580	P04150	0.521768	0.553754	1.0	By_ingredient
SMTT02380	NR3C2	4	Nuclear Receptor Subfamily 3 Group C Member 2	Mineralocorticoid Receptor	ENSG00000151623	P08235	0.592135	0.622655	1.0	By_ingredient
SMTT02420	OGG1	3	8-oxoguanine DNA Glycosylase		ENSG00000114026		0.012311	0.0297294	1.0	By_ingredient
SMTT02490	PCNA	20	Proliferating Cell Nuclear Antigen	Proliferating Cell Nuclear Antigen	ENSG00000132646	P12004	0.0483494	0.0706756	1.0	By_ingredient
SMTT02495	PCYT1A	3	Phosphate Cytidylyltransferase 1, Choline, Alpha	Choline-phosphate Cytidylyltransferase A	ENSG00000161217	P49585	0.00617441	0.0210068	1.0	By_ingredient
SMTT02546	PGD		phosphogluconate dehydrogenase	6-phosphogluconate Dehydrogenase, Decarboxylating		P52209	0.012311	0.0297294	1.0	By_ingredient
SMTT02550	PGR	11	Progesterone Receptor	Progesterone Receptor	ENSG00000082175	P06401	0.390796	0.422428	1.0	By_ingredient
SMTT02679	PPARA		peroxisome proliferator activated receptor alpha	Peroxisome Proliferator-activated Receptor Alpha		Q07869	0.0830833	0.10739	1.0	By_ingredient
SMTT02681	PPARG	3	Peroxisome Proliferator Activated Receptor Gamma	Peroxisome Proliferator-activated Receptor Gamma	ENSG00000132170	P37231	0.0146921	0.0330162	1.0	By_ingredient
SMTT02747	PRSS1	7	Serine Protease 1	Trypsin-1	ENSG00000204983	P07477	0.955111	0.962407	1.0	By_ingredient
SMTT02769	PTEN	10	Phosphatase And Tensin Homolog	Phosphatidylinositol 3,4,5-trisphosphate 3-phosphatase And Dual-specificity Protein Phosphatase PTEN	ENSG00000171862	P60484	0.0483494	0.0706756	1.0	By_ingredient
SMTT02776	PTGS1		prostaglandin-endoperoxide synthase 1	Prostaglandin G/H Synthase 1		P23219	0.238215	0.266817	1.0	By_ingredient
SMTT02777	PTGS2		prostaglandin-endoperoxide synthase 2	Prostaglandin G/H Synthase 2		P35354	0.916896	0.928366	1.0	By_ingredient
SMTT02842	RB1	13	RB Transcriptional Corepressor 1	Retinoblastoma-associated Protein	ENSG00000139687	P06400	0.0716473	0.0954518	1.0	By_ingredient
SMTT02865	RELA		RELA proto-oncogene, NF-kB subunit	Transcription Factor P65		Q04206	0.00547519	0.0197436	1.0	By_ingredient
SMTT02868	RENBP		renin binding protein	N-acylglucosamine 2-epimerase		P51606	0.00617441	0.0210068	1.0	By_ingredient
SMTT02969	RXRA		retinoid X receptor alpha	Retinoic Acid Receptor RXR-alpha		P19793	0.953654	0.9611	1.0	By_ingredient
SMTT03005	SCN5A	3	Sodium Voltage-gated Channel Alpha Subunit 5	Sodium Channel Protein Type 5 Subunit Alpha	ENSG00000183873	Q14524	0.998993	0.999721	1.0	By_ingredient
SMTT03127	SLC22A5	5	Solute Carrier Family 22 Member 5	Solute Carrier Family 22 Member 5	ENSG00000197375	O76082	0.00617441	0.0210068	1.0	By_ingredient
SMTT03253	SOAT1		sterol O-acyltransferase 1	Sterol O-acyltransferase 1		P35610	0.01841	0.0374227	1.0	By_ingredient
SMTT03254	SOAT2		sterol O-acyltransferase 2	Sterol O-acyltransferase 2		O75908	0.012311	0.0297294	1.0	By_ingredient
SMTT03256	SOD1	21	Superoxide Dismutase 1	Superoxide Dismutase [Cu-Zn]	ENSG00000142168	P00441	0.0302153	0.0511155	1.0	By_ingredient
SMTT03304	SREBF1		sterol regulatory element binding transcription factor 1	Sterol Regulatory Element-binding Protein 1		P36956	0.0542277	0.0771129	1.0	By_ingredient
SMTT03459	TH	11	Tyrosine Hydroxylase	Tyrosine 3-monooxygenase	ENSG00000180176	P07101	0.0830833	0.10739	1.0	By_ingredient
SMTT03501	TNC	9	Tenascin C		ENSG00000041982		0.00617441	0.0210068	1.0	By_ingredient
SMTT03502	TNF		tumor necrosis factor	Tumor Necrosis Factor		P01375	0.00714096	0.0226548	1.0	By_ingredient
SMTT03526	TOP1		DNA topoisomerase I	DNA Topoisomerase 1		P11387	0.0483494	0.0706756	1.0	By_ingredient
SMTT03527	TOP2A	17	DNA Topoisomerase II Alpha	DNA Topoisomerase 2-alpha	ENSG00000131747	P11388	0.01841	0.0374227	1.0	By_ingredient
SMTT03530	TP53	17	Tumor Protein P53	Cellular Tumor Antigen P53	ENSG00000141510	P04637	0.0382056	0.0599082	1.0	By_ingredient
SMTT03648	TYR	11	Tyrosinase	Tyrosinase	ENSG00000077498	P14679	0.0773829	0.101427	1.0	By_ingredient
SMTT03665	UGT1A1	2	UDP Glucuronosyltransferase Family 1 Member A1		ENSG00000241635		0.0424349	0.0643889	1.0	By_ingredient
SMTT03701	VCAM1		vascular cell adhesion molecule 1	Vascular Cell Adhesion Protein 1		P19320	0.164514	0.191066	1.0	By_ingredient
SMTT03708	VEGFA		vascular endothelial growth factor A	Vascular Endothelial Growth Factor A		P15692	0.0454067	0.0676988	1.0	By_ingredient
SMTT03764	XDH	2	Xanthine Dehydrogenase	Xanthine Dehydrogenase/oxidase	ENSG00000158125	P47989	0.238768	0.267354	1.0	By_ingredient
SMTT03765	XIAP	X	X-linked Inhibitor Of Apoptosis	E3 Ubiquitin-protein Ligase XIAP	ENSG00000101966	P98170	0.0542277	0.0771129	1.0	By_ingredient
SMTT03845	CCNB1	5	Cyclin B1		ENSG00000134057	P14635	0.12202	0.147641	1.0	By_ingredient
SMTT03877	BAX	19	BCL2 Associated X, Apoptosis Regulator		ENSG00000087088	Q07812	0.0611406	0.0843957	1.0	By_ingredient
SMTT03918	CASP9	1	Caspase 9		ENSG00000132906	P55211	0.243478	0.272174	1.0	By_ingredient
SMTT03980	GUCY2F	X	Guanylate Cyclase 2F, Retinal		ENSG00000101890	P51841	0.012311	0.0297294	1.0	By_ingredient
SMTT03990	NFE2L2	2	Nuclear Factor, Erythroid 2 Like 2		ENSG00000116044	Q16236	0.0542277	0.0771129	1.0	By_ingredient
SMTT04005	MAP2K4	17	Mitogen-activated Protein Kinase Kinase 4		ENSG00000065559	P45985	0.01841	0.0374227	1.0	By_ingredient
SMTT04014	NRF1	7	Nuclear Respiratory Factor 1		ENSG00000106459	Q16656	0.01841	0.0374227	1.0	By_ingredient
SMTT04035	MAPK7	17	Mitogen-activated Protein Kinase 7		ENSG00000166484	Q13164	0.0244717	0.0444999	1.0	By_ingredient
SMTT04074	SLC2A4	17	Solute Carrier Family 2 Member 4		ENSG00000181856	P14672	0.0830833	0.10739	1.0	By_ingredient
SMTT04078	TFAM	10	Transcription Factor A, Mitochondrial		ENSG00000108064	Q00059	0.012311	0.0297294	1.0	By_ingredient
SMTT04090	SOD3	4	Superoxide Dismutase 3		ENSG00000109610	P08294	0.0304963	0.0514392	1.0	By_ingredient
SMTT04091	SP1	12	Sp1 Transcription Factor		ENSG00000185591	P08047	0.012311	0.0297294	1.0	By_ingredient
SMTT04106	AHSA1	14	Activator Of HSP90 ATPase Activity 1		ENSG00000100591	O95433	0.138201	0.164114	1.0	By_ingredient
SMTT04117	ADIPOQ	3	Adiponectin, C1Q And Collagen Domain Containing		ENSG00000181092	Q15848	0.0244717	0.0444999	1.0	By_ingredient
SMTT04127	PTGES	9	Prostaglandin E Synthase		ENSG00000148344	O14684	0.0244717	0.0444999	1.0	By_ingredient
SMTT04187	CUTA	6	CutA Divalent Cation Tolerance Homolog		ENSG00000112514	O60888	0.012311	0.0297294	1.0	By_ingredient
SMTT04194	RETN	19	Resistin		ENSG00000104918	Q9HD89	0.0244717	0.0444999	1.0	By_ingredient
SMTT04215	NUF2	1	NUF2, NDC80 Kinetochore Complex Component		ENSG00000143228	Q9BZD4	0.012311	0.0297294	1.0	By_ingredient
SMTT04231	PPARGC1B	5	PPARG Coactivator 1 Beta		ENSG00000155846	Q86YN6	0.012311	0.0297294	1.0	By_ingredient
SMTT04237	PLB1	2	Phospholipase B1		ENSG00000163803	Q6P1J6	0.229259	0.257637	1.0	By_ingredient
SMTT04239	ENPP7	17	Ectonucleotide Pyrophosphatase/phosphodiesterase 7		ENSG00000182156	Q6UWV6	0.012311	0.0297294	1.0	By_ingredient
SMTT04245	GUSBP1	5	Glucuronidase, Beta Pseudogene 1		ENSG00000183666	Q15486	0.01841	0.0374227	1.0	By_ingredient
SMTT04266	CDC2		Cell Division Control Protein 2 Homolog/cyclin dependent kinase 1			P06493	0.164514	0.191066	1.0	By_ingredient
