# Supplementary material for: A Network Pharmacology-Based Study on Irritable Bowel Syndrome Prevention and Treatment Utilizing Shenling Baizhu Powder
Source: Biomed Res Int. 2021 Nov 23;2021:4579850. doi: 10.1155/2021/4579850 (PMC8632384; doi:10.1155/2021/4579850)
Supplement: Supplementary Materials — Please find detailed data in the supplementary file, including the original data of SymMap, metabolomics, and molecular docking of Shenling Baizhu powder. “Shenling Baizhu powder SymMap” includes all herbal targets and combined targets. “Shenling Baizhu powder metabolomics” includes two-dimensional structural data analysis. “Molecular docking” involves molecule-target docking and the results. [file 4579850.f1.zip › Data in brief/1. Shenling Baizhu powder Symmap/Poria cocos.csv]

Target id	Gene symbol	Chromosome	Gene name	Protein name	Ensembl id	UniProt id	P_value	FDR(BH)	FDR(Bonferroni)	Relationship
SMTT00061	ACTA2	10	Actin, Alpha 2, Smooth Muscle, Aorta	Actin, Aortic Smooth Muscle	ENSG00000107796	P62736	0.029337	0.0501549	1.0	By_ingredient
SMTT00102	ADRA1A		adrenergic, alpha-1A-, receptor	Alpha-1A Adrenergic Receptor		P35348	0.928683	0.938988	1.0	By_ingredient
SMTT00129	AHR		Aryl hydrocarbon receptor	Aryl Hydrocarbon Receptor		P35869	0.00278119	0.0141983	1.0	By_ingredient
SMTT00142	AKR1C3		aldo-keto reductase family 1 member C3	Aldo-keto Reductase Family 1 Member C3		P42330	0.034143	0.0554434	1.0	By_ingredient
SMTT00144	AKT1	14	AKT Serine/threonine Kinase 1	RAC-alpha Serine/threonine-protein Kinase	ENSG00000142208	P31749	0.171995	0.198806	1.0	By_ingredient
SMTT00194	AMY2A		amylase, alpha 2A(pancreatic)	Pancreatic Alpha-amylase		P04746	0.0047894	0.0186651	1.0	By_ingredient
SMTT00214	ANTXR2	4	Anthrax Toxin Receptor 2	Anthrax Toxin Receptor 2	ENSG00000163297	P58335	0.00494974	0.0188592	1.0	By_ingredient
SMTT00244	AR	X	Androgen Receptor	Androgen Receptor	ENSG00000169083	P10275	0.988646	0.991431	1.0	By_ingredient
SMTT00341	BAD		BCL2 associated agonist of cell death	Bcl2-associated Agonist Of Cell Death		Q92934	0.0436845	0.0657877	1.0	By_ingredient
SMTT00356	BCHE		butyrylcholinesterase	Cholinesterase		P06276	0.360555	0.391887	1.0	By_ingredient
SMTT00361	BCL2	18	BCL2, Apoptosis Regulator	Apoptosis Regulator Bcl-2	ENSG00000171791	P10415	9.17e-06	0.000265	0.810445	By_ingredient
SMTT00362	BCL2L1		BCL2 like 1	Bcl-2-like Protein 1		Q07817	0.146928	0.172967	1.0	By_ingredient
SMTT00369	BDNF	11	Brain Derived Neurotrophic Factor	Brain-derived Neurotrophic Factor	ENSG00000176697	P23560	0.0624884	0.0856835	1.0	By_ingredient
SMTT00436	CA2	8	Carbonic Anhydrase 2	Carbonic Anhydrase 2	ENSG00000104267	P00918	0.947505	0.955821	1.0	By_ingredient
SMTT00480	CASP3		Caspase 3	Caspase-3		P42574	0.00336285	0.015708	1.0	By_ingredient
SMTT00482	CASP8	2	Caspase 8	Caspase-8	ENSG00000064012	Q14790	0.138406	0.164312	1.0	By_ingredient
SMTT00487	CAT	11	Catalase	Catalase	ENSG00000121691	P04040	0.223833	0.252095	1.0	By_ingredient
SMTT00521	CCND1	11	Cyclin D1	G1/S-specific Cyclin-D1	ENSG00000110092	P24385	0.196333	0.223823	1.0	By_ingredient
SMTT00546	CD40	20	CD40 Molecule	Tumor Necrosis Factor Receptor Superfamily Member 5	ENSG00000101017	P25942	0.0245074	0.0445103	1.0	By_ingredient
SMTT00552	CD80		CD80 molecule	T-lymphocyte Activation Antigen CD80		P33681	0.0389255	0.0606537	1.0	By_ingredient
SMTT00554	CD86		CD86 molecule	T-lymphocyte Activation Antigen CD86		P42081	0.034143	0.0554434	1.0	By_ingredient
SMTT00563	CDH1	16	Cadherin 1		ENSG00000039068		0.0147766	0.0330747	1.0	By_ingredient
SMTT00570	CDK4	12	Cyclin Dependent Kinase 4	Cyclin-dependent Kinase 4	ENSG00000135446	P11802	0.138406	0.164312	1.0	By_ingredient
SMTT00572	CDK5R1		cyclin dependent kinase 5 regulatory subunit 1	Cyclin-dependent Kinase 5 Activator 1		Q15078	0.00494974	0.0188592	1.0	By_ingredient
SMTT00577	CDKN1A	6	Cyclin Dependent Kinase Inhibitor 1A	Cyclin-dependent Kinase Inhibitor 1	ENSG00000124762	P38936	0.0209092	0.0404344	1.0	By_ingredient
SMTT00612	CETP	16	Cholesteryl Ester Transfer Protein	Cholesteryl Ester Transfer Protein	ENSG00000087237	P11597	0.00987523	0.0265479	1.0	By_ingredient
SMTT00636	CHRM1		cholinergic receptor muscarinic 1	Muscarinic Acetylcholine Receptor M1		P11229	0.980759	0.984837	1.0	By_ingredient
SMTT00721	COL1A1	17	Collagen Type I Alpha 1 Chain	Collagen Alpha-1(I) Chain	ENSG00000108821	P02452	0.00182534	0.0110243	1.0	By_ingredient
SMTT00748	COMT	22	Catechol-O-methyltransferase	Catechol O-methyltransferase	ENSG00000093010	P21964	0.0245074	0.0445103	1.0	By_ingredient
SMTT00793	CRP		C-reactive protein	C-reactive Protein		P02741	0.0196539	0.0387969	1.0	By_ingredient
SMTT00838	CTSD	11	Cathepsin D	Cathepsin D	ENSG00000117984	P07339	0.509416	0.541354	1.0	By_ingredient
SMTT00851	CXCL8		C-X-C motif chemokine ligand 8	Interleukin-8		P10145	0.00842931	0.02451	1.0	By_ingredient
SMTT00863	CYP17A1	10	Cytochrome P450 Family 17 Subfamily A Member 1	Steroid 17-alpha-hydroxylase/17,20 Lyase	ENSG00000148795	P05093	0.00494974	0.0188592	1.0	By_ingredient
SMTT00865	CYP1A1		cytochrome P450 family 1 subfamily A member 1	Cytochrome P450 1A1		P04798	0.000315433	0.00324946	1.0	By_ingredient
SMTT00866	CYP1A2		cytochrome P450 family 1 subfamily A member 2	Cytochrome P450 1A2		P05177	0.0854795	0.109889	1.0	By_ingredient
SMTT00883	CYP3A4		cytochrome P450 family 3 subfamily A member 4	Cytochrome P450 3A4		P08684	0.142677	0.168596	1.0	By_ingredient
SMTT00884	CYP3A43		cytochrome P450 family 3 subfamily A member 43	Cytochrome P450 3A43		Q9HB55	0.00494974	0.0188592	1.0	By_ingredient
SMTT00940	DHCR7	11	7-dehydrocholesterol Reductase	7-dehydrocholesterol Reductase	ENSG00000172893	Q9UBM7	0.00494974	0.0188592	1.0	By_ingredient
SMTT01000	DNPEP		aspartyl aminopeptidase	Aspartyl Aminopeptidase		Q9ULA0	0.00494974	0.0188592	1.0	By_ingredient
SMTT01033	DUOX2	15	Dual Oxidase 2		ENSG00000140279		0.0484202	0.0707557	1.0	By_ingredient
SMTT01057	EDN1	6	Endothelin 1	Endothelin-1	ENSG00000078401	P05305	0.057822	0.0808248	1.0	By_ingredient
SMTT01084	EIF6		eukaryotic translation initiation factor 6	Eukaryotic Translation Initiation Factor 6		P56537	0.134114	0.159966	1.0	By_ingredient
SMTT01104	ENPEP		glutamyl aminopeptidase	Glutamyl Aminopeptidase		Q07075	0.00987523	0.0265479	1.0	By_ingredient
SMTT01108	EP300	22	E1A Binding Protein P300		ENSG00000100393		0.0147766	0.0330747	1.0	By_ingredient
SMTT01118	EPHX1	1	Epoxide Hydrolase 1		ENSG00000143819		0.00987523	0.0265479	1.0	By_ingredient
SMTT01124	ERBB2	17	Erb-b2 Receptor Tyrosine Kinase 2	Receptor Tyrosine-protein Kinase ErbB-2	ENSG00000141736	P04626	0.029337	0.0501549	1.0	By_ingredient
SMTT01142	ESR2		estrogen receptor 2	Estrogen Receptor Beta		Q92731	0.833511	0.852027	1.0	By_ingredient
SMTT01201	FASLG	1	Fas Ligand		ENSG00000117560		0.0389255	0.0606537	1.0	By_ingredient
SMTT01202	FASN		fatty acid synthase	Fatty Acid Synthase		P49327	0.12111	0.146658	1.0	By_ingredient
SMTT01270	FN1	2	Fibronectin 1	Fibronectin	ENSG00000115414	P02751	0.057822	0.0808248	1.0	By_ingredient
SMTT01340	GATA1	X	GATA Binding Protein 1		ENSG00000102145		0.00987523	0.0265479	1.0	By_ingredient
SMTT01341	GATA2	3	GATA Binding Protein 2		ENSG00000179348		0.00494974	0.0188592	1.0	By_ingredient
SMTT01464	GRIA2		glutamate ionotropic receptor AMPA type subunit 2	Glutamate Receptor 2		P42262	0.411499	0.443294	1.0	By_ingredient
SMTT01562	HMBS	11	Hydroxymethylbilane Synthase		ENSG00000256269		0.00494974	0.0188592	1.0	By_ingredient
SMTT01567	HMGCR		3-hydroxy-3-methylglutaryl-CoA reductase	3-hydroxy-3-methylglutaryl-coenzyme A Reductase		P04035	0.0671319	0.0906346	1.0	By_ingredient
SMTT01569	HMOX1	22	Heme Oxygenase 1	Heme Oxygenase 1	ENSG00000100292	P09601	0.125466	0.15116	1.0	By_ingredient
SMTT01652	IFNG		interferon gamma	Interferon Gamma		P01579	0.112333	0.137728	1.0	By_ingredient
SMTT01671	IGHG1		immunoglobulin heavy constant gamma 1	Immunoglobulin heavy constant gamma 1		P01857	0.000560935	0.00479871	1.0	By_ingredient
SMTT01682	IL10	1	Interleukin 10	Interleukin-10	ENSG00000136634	P22301	0.00434722	0.0177994	1.0	By_ingredient
SMTT01697	IL1B		interleukin 1 beta	Interleukin-1 Beta		P01584	0.00143474	0.00937008	1.0	By_ingredient
SMTT01700	IL2		interleukin 2	Interleukin-2		P60568	0.112333	0.137728	1.0	By_ingredient
SMTT01710	IL4		interleukin 4	Interleukin-4		P05112	0.00842931	0.02451	1.0	By_ingredient
SMTT01712	IL6	7	Interleukin 6	Interleukin-6	ENSG00000136244	P05231	0.0314077	0.0523254	1.0	By_ingredient
SMTT01724	INS	11	Insulin	Insulin	ENSG00000254647	P01308	0.0484202	0.0707557	1.0	By_ingredient
SMTT01924	LCAT	16	Lecithin-cholesterol Acyltransferase		ENSG00000213398		0.00494974	0.0188592	1.0	By_ingredient
SMTT01979	LPL	8	Lipoprotein Lipase	Lipoprotein Lipase	ENSG00000175445	P06858	0.00182534	0.0110243	1.0	By_ingredient
SMTT02033	MAPK1	22	Mitogen-activated Protein Kinase 1	Mitogen-activated Protein Kinase 1	ENSG00000100030	P28482	0.184253	0.211369	1.0	By_ingredient
SMTT02038	MAPK8		Mitogen-activated Protein Kinase 8	Mitogen-activated Protein Kinase 8		P45983	0.0945188	0.119206	1.0	By_ingredient
SMTT02042	MAPT	17	Microtubule Associated Protein Tau	Microtubule-associated Protein Tau	ENSG00000186868	P10636	0.00987523	0.0265479	1.0	By_ingredient
SMTT02101	MGST1		microsomal glutathione S-transferase 1	Microsomal Glutathione S-transferase 1		P10620	0.0147766	0.0330747	1.0	By_ingredient
SMTT02157	MPO	17	Myeloperoxidase	Myeloperoxidase	ENSG00000005381	P05164	0.0945188	0.119206	1.0	By_ingredient
SMTT02203	MYC	8	MYC Proto-oncogene, BHLH Transcription Factor	Myc Proto-oncogene Protein	ENSG00000136997	P01106	0.12111	0.146658	1.0	By_ingredient
SMTT02251	NCOA1		nuclear receptor coactivator 1	Nuclear Receptor Coactivator 1		Q15788	0.872037	0.887573	1.0	By_ingredient
SMTT02314	NFKBIA	14	NFKB Inhibitor Alpha	NF-kappa-B Inhibitor Alpha	ENSG00000100906	P25963	0.155366	0.181652	1.0	By_ingredient
SMTT02349	NOS2		nitric oxide synthase 2	Nitric Oxide Synthase, Inducible		P35228	0.658995	0.687521	1.0	By_ingredient
SMTT02350	NOS3		nitric oxide synthase 3	Nitric Oxide Synthase, Endothelial		P29474	0.0945188	0.119206	1.0	By_ingredient
SMTT02379	NR3C1	5	Nuclear Receptor Subfamily 3 Group C Member 1	Glucocorticoid Receptor	ENSG00000113580	P04150	0.755722	0.779364	1.0	By_ingredient
SMTT02380	NR3C2	4	Nuclear Receptor Subfamily 3 Group C Member 2	Mineralocorticoid Receptor	ENSG00000151623	P08235	0.212607	0.240573	1.0	By_ingredient
SMTT02402	NTRK2	9	Neurotrophic Receptor Tyrosine Kinase 2	BDNF/NT-3 Growth Factors Receptor	ENSG00000148053	Q16620	0.00987523	0.0265479	1.0	By_ingredient
SMTT02464	PAM		peptidylglycine alpha-amidating monooxygenase	Peptidyl-glycine Alpha-amidating Monooxygenase		P19021	0.00494974	0.0188592	1.0	By_ingredient
SMTT02495	PCYT1A	3	Phosphate Cytidylyltransferase 1, Choline, Alpha	Choline-phosphate Cytidylyltransferase A	ENSG00000161217	P49585	0.00494974	0.0188592	1.0	By_ingredient
SMTT02519	PDX1	13	Pancreatic And Duodenal Homeobox 1		ENSG00000139515		0.00494974	0.0188592	1.0	By_ingredient
SMTT02550	PGR	11	Progesterone Receptor	Progesterone Receptor	ENSG00000082175	P06401	0.0346542	0.0560366	1.0	By_ingredient
SMTT02603	PLAT	8	Plasminogen Activator, Tissue Type	Tissue-type Plasminogen Activator	ENSG00000104368	P00750	0.0671319	0.0906346	1.0	By_ingredient
SMTT02604	PLAU	10	Plasminogen Activator, Urokinase	Urokinase-type Plasminogen Activator	ENSG00000122861	P00749	0.142677	0.168596	1.0	By_ingredient
SMTT02615	PLG	6	Plasminogen	Plasminogen	ENSG00000122194	P00747	0.0196539	0.0387969	1.0	By_ingredient
SMTT02668	PON1	7	Paraoxonase 1	Serum Paraoxonase/arylesterase 1	ENSG00000005421	P27169	0.0436845	0.0657877	1.0	By_ingredient
SMTT02679	PPARA		peroxisome proliferator activated receptor alpha	Peroxisome Proliferator-activated Receptor Alpha		Q07869	0.00212271	0.0121561	1.0	By_ingredient
SMTT02680	PPARD		peroxisome proliferator activated receptor delta	Peroxisome Proliferator-activated Receptor Delta		Q03181	0.00987523	0.0265479	1.0	By_ingredient
SMTT02681	PPARG	3	Peroxisome Proliferator Activated Receptor Gamma	Peroxisome Proliferator-activated Receptor Gamma	ENSG00000132170	P37231	0.138406	0.164312	1.0	By_ingredient
SMTT02707	PREP		prolyl endopeptidase	Prolyl Endopeptidase		P48147	0.00494974	0.0188592	1.0	By_ingredient
SMTT02718	PRKCB		protein kinase C beta	Protein Kinase C Beta Type		P05771	0.00842931	0.02451	1.0	By_ingredient
SMTT02747	PRSS1	7	Serine Protease 1	Trypsin-1	ENSG00000204983	P07477	0.980234	0.984377	1.0	By_ingredient
SMTT02769	PTEN	10	Phosphatase And Tensin Homolog	Phosphatidylinositol 3,4,5-trisphosphate 3-phosphatase And Dual-specificity Protein Phosphatase PTEN	ENSG00000171862	P60484	0.0389255	0.0606537	1.0	By_ingredient
SMTT02776	PTGS1		prostaglandin-endoperoxide synthase 1	Prostaglandin G/H Synthase 1		P23219	0.559132	0.590593	1.0	By_ingredient
SMTT02777	PTGS2		prostaglandin-endoperoxide synthase 2	Prostaglandin G/H Synthase 2		P35354	0.942008	0.950895	1.0	By_ingredient
SMTT02842	RB1	13	RB Transcriptional Corepressor 1	Retinoblastoma-associated Protein	ENSG00000139687	P06400	0.057822	0.0808248	1.0	By_ingredient
SMTT02865	RELA		RELA proto-oncogene, NF-kB subunit	Transcription Factor P65		Q04206	0.109519	0.134841	1.0	By_ingredient
SMTT02969	RXRA		retinoid X receptor alpha	Retinoic Acid Receptor RXR-alpha		P19793	0.531511	0.56335	1.0	By_ingredient
SMTT03005	SCN5A	3	Sodium Voltage-gated Channel Alpha Subunit 5	Sodium Channel Protein Type 5 Subunit Alpha	ENSG00000183873	Q14524	0.996027	0.997528	1.0	By_ingredient
SMTT03048	SERPINE1	7	Serpin Family E Member 1	Plasminogen Activator Inhibitor 1	ENSG00000106366	P05121	0.00106332	0.00759161	1.0	By_ingredient
SMTT03127	SLC22A5	5	Solute Carrier Family 22 Member 5	Solute Carrier Family 22 Member 5	ENSG00000197375	O76082	0.00494974	0.0188592	1.0	By_ingredient
SMTT03155	SLC2A2	3	Solute Carrier Family 2 Member 2	Solute Carrier Family 2, Facilitated Glucose Transporter Member 2	ENSG00000163581	P11168	0.00494974	0.0188592	1.0	By_ingredient
SMTT03193	SLC6A2	16	Solute Carrier Family 6 Member 2	Sodium-dependent Noradrenaline Transporter	ENSG00000103546	P23975	0.851233	0.868378	1.0	By_ingredient
SMTT03215	SMAD2		SMAD family member 2	Mothers Against Decapentaplegic Homolog 2		Q15796	0.0147766	0.0330747	1.0	By_ingredient
SMTT03253	SOAT1		sterol O-acyltransferase 1	Sterol O-acyltransferase 1		P35610	0.0147766	0.0330747	1.0	By_ingredient
SMTT03256	SOD1	21	Superoxide Dismutase 1	Superoxide Dismutase [Cu-Zn]	ENSG00000142168	P00441	0.196333	0.223823	1.0	By_ingredient
SMTT03346	SULT1A1		sulfotransferase family 1A member 1	Sulfotransferase 1A1		P50225	0.00494974	0.0188592	1.0	By_ingredient
SMTT03447	TGFB1	19	Transforming Growth Factor Beta 1	Transforming Growth Factor Beta-1	ENSG00000105329	P01137	0.12111	0.146658	1.0	By_ingredient
SMTT03502	TNF		tumor necrosis factor	Tumor Necrosis Factor		P01375	0.023209	0.0431072	1.0	By_ingredient
SMTT03530	TP53	17	Tumor Protein P53	Cellular Tumor Antigen P53	ENSG00000141510	P04637	0.00194666	0.011459	1.0	By_ingredient
SMTT03662	UCP2	11	Uncoupling Protein 2		ENSG00000175567		0.0196539	0.0387969	1.0	By_ingredient
SMTT03701	VCAM1		vascular cell adhesion molecule 1	Vascular Cell Adhesion Protein 1		P19320	0.134114	0.159966	1.0	By_ingredient
SMTT03708	VEGFA		vascular endothelial growth factor A	Vascular Endothelial Growth Factor A		P15692	0.239127	0.267716	1.0	By_ingredient
SMTT03765	XIAP	X	X-linked Inhibitor Of Apoptosis	E3 Ubiquitin-protein Ligase XIAP	ENSG00000101966	P98170	0.0436845	0.0657877	1.0	By_ingredient
SMTT03844	CCK	3	Cholecystokinin		ENSG00000187094	P06307	0.0147766	0.0330747	1.0	By_ingredient
SMTT03845	CCNB1	5	Cyclin B1		ENSG00000134057	P14635	0.0990053	0.123943	1.0	By_ingredient
SMTT03862	CDC25A	3	Cell Division Cycle 25A		ENSG00000164045	P30304	0.00494974	0.0188592	1.0	By_ingredient
SMTT03877	BAX	19	BCL2 Associated X, Apoptosis Regulator		ENSG00000087088	Q07812	0.0412289	0.0631312	1.0	By_ingredient
SMTT03918	CASP9	1	Caspase 9		ENSG00000132906	P55211	0.00143474	0.00937008	1.0	By_ingredient
SMTT03934	GAP43	3	Growth Associated Protein 43		ENSG00000172020	P17677	0.0245074	0.0445103	1.0	By_ingredient
SMTT03938	GCG	2	Glucagon		ENSG00000115263	P01275	0.0147766	0.0330747	1.0	By_ingredient
SMTT03952	FABP1	2	Fatty Acid Binding Protein 1		ENSG00000163586	P07148	2.42e-05	0.000535	1.0	By_ingredient
SMTT03989	NFE2	12	Nuclear Factor, Erythroid 2		ENSG00000123405	Q16621	0.00494974	0.0188592	1.0	By_ingredient
SMTT03990	NFE2L2	2	Nuclear Factor, Erythroid 2 Like 2		ENSG00000116044	Q16236	0.0436845	0.0657877	1.0	By_ingredient
SMTT03993	SCD	10	Stearoyl-CoA Desaturase		ENSG00000099194	O00767	0.00494974	0.0188592	1.0	By_ingredient
SMTT04018	RASGRF1	15	Ras Protein Specific Guanine Nucleotide Releasing Factor 1		ENSG00000058335	Q13972	0.0147766	0.0330747	1.0	By_ingredient
SMTT04023	RBP2	3	Retinol Binding Protein 2		ENSG00000114113	P50120	2.42e-05	0.000535	1.0	By_ingredient
SMTT04030	CITED1	X	Cbp/p300 Interacting Transactivator With Glu/Asp Rich Carboxy-terminal Domain 1		ENSG00000125931	Q99966	0.00494974	0.0188592	1.0	By_ingredient
SMTT04041	MYB	6	MYB Proto-oncogene, Transcription Factor		ENSG00000118513	P10242	0.00494974	0.0188592	1.0	By_ingredient
SMTT04047	PYY	17	Peptide YY		ENSG00000131096	P10082	0.00494974	0.0188592	1.0	By_ingredient
SMTT04055	PSMD3	17	Proteasome 26S Subunit, Non-ATPase 3		ENSG00000108344	O43242	0.0245074	0.0445103	1.0	By_ingredient
SMTT04068	UCP3	11	Uncoupling Protein 3		ENSG00000175564	P55916	0.00987523	0.0265479	1.0	By_ingredient
SMTT04076	TEP1	14	Telomerase Associated Protein 1		ENSG00000129566	Q99973	0.0717527	0.0955477	1.0	By_ingredient
SMTT04081	THBS1	15	Thrombospondin 1		ENSG00000137801	P07996	0.00987523	0.0265479	1.0	By_ingredient
SMTT04091	SP1	12	Sp1 Transcription Factor		ENSG00000185591	P08047	0.00987523	0.0265479	1.0	By_ingredient
SMTT04106	AHSA1	14	Activator Of HSP90 ATPase Activity 1		ENSG00000100591	O95433	0.112333	0.137728	1.0	By_ingredient
SMTT04152	ATMIN	16	ATM Interactor		ENSG00000166454	O43313	0.00494974	0.0188592	1.0	By_ingredient
SMTT04190	CDK12	17	Cyclin Dependent Kinase 12		ENSG00000167258	Q9NYV4	0.00494974	0.0188592	1.0	By_ingredient
SMTT04237	PLB1	2	Phospholipase B1		ENSG00000163803	Q6P1J6	5.71e-08	5.27e-06	0.00505	By_ingredient
SMTT04239	ENPP7	17	Ectonucleotide Pyrophosphatase/phosphodiesterase 7		ENSG00000182156	Q6UWV6	0.00987523	0.0265479	1.0	By_ingredient
SMTT04245	GUSBP1	5	Glucuronidase, Beta Pseudogene 1		ENSG00000183666	Q15486	0.0147766	0.0330747	1.0	By_ingredient
SMTT04266	CDC2		Cell Division Control Protein 2 Homolog/cyclin dependent kinase 1			P06493	0.000391232	0.00375715	1.0	By_ingredient
SMTT04275	crn-7		Cell-death-related Nuclease 7			P34387	0.00494974	0.0188592	1.0	By_ingredient
