# Supplementary material for: A Network Pharmacology-Based Study on Irritable Bowel Syndrome Prevention and Treatment Utilizing Shenling Baizhu Powder
Source: Biomed Res Int. 2021 Nov 23;2021:4579850. doi: 10.1155/2021/4579850 (PMC8632384; doi:10.1155/2021/4579850)
Supplement: Supplementary Materials — Please find detailed data in the supplementary file, including the original data of SymMap, metabolomics, and molecular docking of Shenling Baizhu powder. “Shenling Baizhu powder SymMap” includes all herbal targets and combined targets. “Shenling Baizhu powder metabolomics” includes two-dimensional structural data analysis. “Molecular docking” involves molecule-target docking and the results. [file 4579850.f1.zip › Data in brief/1. Shenling Baizhu powder Symmap/White lentils.csv]

Target id	Gene symbol	Chromosome	Gene name	Protein name	Ensembl id	UniProt id	P_value	FDR(BH)	FDR(Bonferroni)	Relationship
SMTT00016	ABCB1		ATP-binding cassette, sub-family B (MDR/TAP), member 1	Multidrug Resistance Protein 1		P08183	0.0846731	0.109022	1.0	By_ingredient
SMTT00023	ABCC2	10	ATP Binding Cassette Subfamily C Member 2	Canalicular Multispecific Organic Anion Transporter 1	ENSG00000023839	Q92887	0.0230055	0.0428653	1.0	By_ingredient
SMTT00032	ABCG2		ATP-binding cassette, sub-family G (WHITE), member 2	ATP-binding Cassette Sub-family G Member 2		Q9UNQ0	0.0275434	0.0481923	1.0	By_ingredient
SMTT00038	ACACA	17	Acetyl-CoA Carboxylase Alpha	Acetyl-CoA Carboxylase 1	ENSG00000278540	Q13085	0.000211338	0.00245889	1.0	By_ingredient
SMTT00049	ACE	17	Angiotensin I Converting Enzyme	Angiotensin-converting Enzyme	ENSG00000159640	P12821	0.0184467	0.037439	1.0	By_ingredient
SMTT00051	ACHE		acetylcholinesterase (Yt blood group)	Acetylcholinesterase		P22303	0.0951126	0.11984	1.0	By_ingredient
SMTT00056	ACPP		acid phosphatase, prostate	Prostatic Acid Phosphatase		P15309	0.0320605	0.0530252	1.0	By_ingredient
SMTT00102	ADRA1A		adrenergic, alpha-1A-, receptor	Alpha-1A Adrenergic Receptor		P35348	0.915996	0.92753	1.0	By_ingredient
SMTT00106	ADRB2		adrenergic, beta-2-, receptor, surface	Beta-2 Adrenergic Receptor		P07550	0.966035	0.971951	1.0	By_ingredient
SMTT00122	AGT	1	Angiotensinogen	Angiotensinogen	ENSG00000135744	P01019	0.0230055	0.0428653	1.0	By_ingredient
SMTT00129	AHR		Aryl hydrocarbon receptor	Aryl Hydrocarbon Receptor		P35869	0.00245308	0.0132173	1.0	By_ingredient
SMTT00139	AKR1B1		Aldo-keto reductase family 1, member B1 (aldose reductase)	Aldose Reductase		P15121	0.0569641	0.0798859	1.0	By_ingredient
SMTT00140	AKR1C1		Aldo-keto reductase family 1, member C1 (dihydrodiol dehydrogenase 1; 20-alpha (3-alpha)-hydroxysteroid dehydrogenase)	Aldo-keto Reductase Family 1 Member C1		Q04828	0.0138668	0.0319753	1.0	By_ingredient
SMTT00142	AKR1C3		aldo-keto reductase family 1 member C3	Aldo-keto Reductase Family 1 Member C3		P42330	0.0320605	0.0530252	1.0	By_ingredient
SMTT00144	AKT1	14	AKT Serine/threonine Kinase 1	RAC-alpha Serine/threonine-protein Kinase	ENSG00000142208	P31749	0.000726415	0.00577759	1.0	By_ingredient
SMTT00175	ALOX5		arachidonate 5-lipoxygenase	Arachidonate 5-lipoxygenase		P09917	1.09e-05	0.000299	0.963342	By_ingredient
SMTT00214	ANTXR2	4	Anthrax Toxin Receptor 2	Anthrax Toxin Receptor 2	ENSG00000163297	P58335	0.00464357	0.0183345	1.0	By_ingredient
SMTT00238	APP	21	Amyloid Beta Precursor Protein	Amyloid Beta A4 Protein	ENSG00000142192	P05067	0.0543363	0.0772065	1.0	By_ingredient
SMTT00244	AR	X	Androgen Receptor	Androgen Receptor	ENSG00000169083	P10275	0.226233	0.254532	1.0	By_ingredient
SMTT00297	ATP5B		ATP synthase F1 subunit beta	ATP Synthase Subunit Beta, Mitochondrial		P06576	0.000127188	0.00173043	1.0	By_ingredient
SMTT00341	BAD		BCL2 associated agonist of cell death	Bcl2-associated Agonist Of Cell Death		Q92934	0.0410324	0.0628767	1.0	By_ingredient
SMTT00361	BCL2	18	BCL2, Apoptosis Regulator	Apoptosis Regulator Bcl-2	ENSG00000171791	P10415	9.34e-05	0.00139	1.0	By_ingredient
SMTT00362	BCL2L1		BCL2 like 1	Bcl-2-like Protein 1		Q07817	0.00966262	0.0263305	1.0	By_ingredient
SMTT00363	BCL2L2		BCL2 like 2	Bcl-2-like Protein 2		Q92843	0.00926581	0.0257576	1.0	By_ingredient
SMTT00369	BDNF	11	Brain Derived Neurotrophic Factor	Brain-derived Neurotrophic Factor	ENSG00000176697	P23560	0.0587303	0.0818859	1.0	By_ingredient
SMTT00380	BIRC5		Baculoviral IAP repeat containing 5	Baculoviral IAP Repeat-containing Protein 5		O15392	0.076105	0.100116	1.0	By_ingredient
SMTT00389	BMP2	20	Bone Morphogenetic Protein 2		ENSG00000125845		0.0275434	0.0481923	1.0	By_ingredient
SMTT00461	CALM3	19	Calmodulin 3		ENSG00000160014		0.556928	0.588497	1.0	By_ingredient
SMTT00480	CASP3		Caspase 3	Caspase-3		P42574	0.0200659	0.0393174	1.0	By_ingredient
SMTT00481	CASP7		Caspase 7	Caspase-7		P55210	0.0365568	0.058054	1.0	By_ingredient
SMTT00482	CASP8	2	Caspase 8	Caspase-8	ENSG00000064012	Q14790	0.00852532	0.0247379	1.0	By_ingredient
SMTT00487	CAT	11	Catalase	Catalase	ENSG00000121691	P04040	3.83e-06	0.000136	0.338495	By_ingredient
SMTT00490	CAV1	7	Caveolin 1		ENSG00000105974		0.000586394	0.00494754	1.0	By_ingredient
SMTT00516	CCL2		C-C motif chemokine ligand 2	C-C Motif Chemokine 2		P13500	0.0889276	0.113418	1.0	By_ingredient
SMTT00520	CCNA2		cyclin A2	Cyclin-A2		P20248	0.465675	0.497899	1.0	By_ingredient
SMTT00521	CCND1	11	Cyclin D1	G1/S-specific Cyclin-D1	ENSG00000110092	P24385	0.00111773	0.0078638	1.0	By_ingredient
SMTT00545	CD4	12	CD4 Molecule	T-cell Surface Glycoprotein CD4	ENSG00000010610	P01730	0.00926581	0.0257576	1.0	By_ingredient
SMTT00547	CD40LG	X	CD40 Ligand	CD40 Ligand	ENSG00000102245	P29965	0.0230055	0.0428653	1.0	By_ingredient
SMTT00563	CDH1	16	Cadherin 1		ENSG00000039068		0.0138668	0.0319753	1.0	By_ingredient
SMTT00569	CDK2		cyclin dependent kinase 2	Cyclin-dependent Kinase 2		P24941	0.349147	0.380287	1.0	By_ingredient
SMTT00570	CDK4	12	Cyclin Dependent Kinase 4	Cyclin-dependent Kinase 4	ENSG00000135446	P11802	0.00852532	0.0247379	1.0	By_ingredient
SMTT00574	CDK6	7	Cyclin Dependent Kinase 6	Cyclin-dependent Kinase 6	ENSG00000105810	Q00534	0.0410324	0.0628767	1.0	By_ingredient
SMTT00577	CDKN1A	6	Cyclin Dependent Kinase Inhibitor 1A	Cyclin-dependent Kinase Inhibitor 1	ENSG00000124762	P38936	0.0185499	0.0375725	1.0	By_ingredient
SMTT00579	CDKN1C	11	Cyclin Dependent Kinase Inhibitor 1C		ENSG00000129757		0.00464357	0.0183345	1.0	By_ingredient
SMTT00580	CDKN2A	9	Cyclin Dependent Kinase Inhibitor 2A		ENSG00000147889		0.000316048	0.00324946	1.0	By_ingredient
SMTT00590	CEBPA	19	CCAAT Enhancer Binding Protein Alpha		ENSG00000245848		0.00926581	0.0257576	1.0	By_ingredient
SMTT00612	CETP	16	Cholesteryl Ester Transfer Protein	Cholesteryl Ester Transfer Protein	ENSG00000087237	P11597	0.00926581	0.0257576	1.0	By_ingredient
SMTT00628	CHEK2	22	Checkpoint Kinase 2	Serine/threonine-protein Kinase Chk2	ENSG00000183765	O96017	0.0138668	0.0319753	1.0	By_ingredient
SMTT00636	CHRM1		cholinergic receptor muscarinic 1	Muscarinic Acetylcholine Receptor M1		P11229	0.792145	0.813755	1.0	By_ingredient
SMTT00654	CHUK	10	Conserved Helix-loop-helix Ubiquitous Kinase	Inhibitor Of Nuclear Factor Kappa-B Kinase Subunit Alpha	ENSG00000213341	O15111	0.0230055	0.0428653	1.0	By_ingredient
SMTT00721	COL1A1	17	Collagen Type I Alpha 1 Chain	Collagen Alpha-1(I) Chain	ENSG00000108821	P02452	0.00160901	0.010122	1.0	By_ingredient
SMTT00726	COL3A1	2	Collagen Type III Alpha 1 Chain	Collagen Alpha-1(III) Chain	ENSG00000168542	P02461	0.000441129	0.00406422	1.0	By_ingredient
SMTT00748	COMT	22	Catechol-O-methyltransferase	Catechol O-methyltransferase	ENSG00000093010	P21964	0.000211338	0.00245889	1.0	By_ingredient
SMTT00786	CREB1	2	CAMP Responsive Element Binding Protein 1	Cyclic AMP-responsive Element-binding Protein 1	ENSG00000118260	P16220	0.0587303	0.0818859	1.0	By_ingredient
SMTT00793	CRP		C-reactive protein	C-reactive Protein		P02741	0.000127188	0.00173043	1.0	By_ingredient
SMTT00838	CTSD	11	Cathepsin D	Cathepsin D	ENSG00000117984	P07339	0.00444777	0.0179405	1.0	By_ingredient
SMTT00849	CXCL10		C-X-C motif chemokine ligand 10	C-X-C Motif Chemokine 10		P02778	0.00464357	0.0183345	1.0	By_ingredient
SMTT00851	CXCL8		C-X-C motif chemokine ligand 8	Interleukin-8		P10145	0.122267	0.147889	1.0	By_ingredient
SMTT00864	CYP19A1	15	Cytochrome P450 Family 19 Subfamily A Member 1	Aromatase	ENSG00000137869	P11511	0.063104	0.0863385	1.0	By_ingredient
SMTT00865	CYP1A1		cytochrome P450 family 1 subfamily A member 1	Cytochrome P450 1A1		P04798	0.00694135	0.0224824	1.0	By_ingredient
SMTT00866	CYP1A2		cytochrome P450 family 1 subfamily A member 2	Cytochrome P450 1A2		P05177	7.51e-05	0.0012	1.0	By_ingredient
SMTT00867	CYP1B1	2	Cytochrome P450 Family 1 Subfamily B Member 1	Cytochrome P450 1B1	ENSG00000138061	Q16678	0.000316048	0.00324946	1.0	By_ingredient
SMTT00874	CYP2A6	19	Cytochrome P450 Family 2 Subfamily A Member 6	Cytochrome P450 2A6	ENSG00000255974	P11509	0.00464357	0.0183345	1.0	By_ingredient
SMTT00875	CYP2B6		cytochrome P450 family 2 subfamily B member 6	Cytochrome P450 2B6		P20813	0.0454875	0.0677712	1.0	By_ingredient
SMTT00883	CYP3A4		cytochrome P450 family 3 subfamily A member 4	Cytochrome P450 3A4		P08684	2.98e-07	1.92e-05	0.0263372	By_ingredient
SMTT00885	CYP3A7		cytochrome P450 family 3 subfamily A member 7	Cytochrome P450 3A7		P24462	0.00464357	0.0183345	1.0	By_ingredient
SMTT00888	CYP7A1	8	Cytochrome P450 Family 7 Subfamily A Member 1		ENSG00000167910		0.0138668	0.0319753	1.0	By_ingredient
SMTT00998	DNMT3A	2	DNA Methyltransferase 3 Alpha		ENSG00000119772		0.00464357	0.0183345	1.0	By_ingredient
SMTT00999	DNMT3B	20	DNA Methyltransferase 3 Beta		ENSG00000088305		0.00464357	0.0183345	1.0	By_ingredient
SMTT01000	DNPEP		aspartyl aminopeptidase	Aspartyl Aminopeptidase		Q9ULA0	0.00464357	0.0183345	1.0	By_ingredient
SMTT01033	DUOX2	15	Dual Oxidase 2		ENSG00000140279		0.0454875	0.0677712	1.0	By_ingredient
SMTT01057	EDN1	6	Endothelin 1	Endothelin-1	ENSG00000078401	P05305	0.00136559	0.00905273	1.0	By_ingredient
SMTT01059	EDNRA	4	Endothelin Receptor Type A	Endothelin-1 Receptor	ENSG00000151617	P25101	0.0230055	0.0428653	1.0	By_ingredient
SMTT01061	EEF1A1		eukaryotic translation elongation factor 1 alpha 1	Elongation Factor 1-alpha 1		P68104	0.00464357	0.0183345	1.0	By_ingredient
SMTT01069	EGF	4	Epidermal Growth Factor	Pro-epidermal Growth Factor	ENSG00000138798	P01133	0.000586394	0.00494754	1.0	By_ingredient
SMTT01070	EGFR	7	Epidermal Growth Factor Receptor	Epidermal Growth Factor Receptor	ENSG00000146648	P00533	0.0050639	0.0190616	1.0	By_ingredient
SMTT01084	EIF6		eukaryotic translation initiation factor 6	Eukaryotic Translation Initiation Factor 6		P56537	0.00798091	0.0239427	1.0	By_ingredient
SMTT01086	ELANE	19	Elastase, Neutrophil Expressed	Neutrophil Elastase	ENSG00000197561	P08246	0.0184467	0.037439	1.0	By_ingredient
SMTT01104	ENPEP		glutamyl aminopeptidase	Glutamyl Aminopeptidase		Q07075	0.00926581	0.0257576	1.0	By_ingredient
SMTT01115	EPHA2	1	EPH Receptor A2	Ephrin Type-A Receptor 2	ENSG00000142627	P29317	0.00926581	0.0257576	1.0	By_ingredient
SMTT01124	ERBB2	17	Erb-b2 Receptor Tyrosine Kinase 2	Receptor Tyrosine-protein Kinase ErbB-2	ENSG00000141736	P04626	1.92e-06	8.07e-05	0.16969	By_ingredient
SMTT01125	ERBB3	12	Erb-b2 Receptor Tyrosine Kinase 3		ENSG00000065361		0.00464357	0.0183345	1.0	By_ingredient
SMTT01141	ESR1	6	Estrogen Receptor 1	Estrogen Receptor	ENSG00000091831	P03372	0.194682	0.222131	1.0	By_ingredient
SMTT01142	ESR2		estrogen receptor 2	Estrogen Receptor Beta		Q92731	0.0256719	0.0459975	1.0	By_ingredient
SMTT01170	F3		coagulation factor III, tissue factor	Tissue Factor		P13726	0.00215293	0.0122522	1.0	By_ingredient
SMTT01200	FAS	10	Fas Cell Surface Death Receptor		ENSG00000026103		0.0138668	0.0319753	1.0	By_ingredient
SMTT01202	FASN		fatty acid synthase	Fatty Acid Synthase		P49327	0.114047	0.139566	1.0	By_ingredient
SMTT01214	FCER1A		Fc fragment of IgE receptor Ia	High Affinity Immunoglobulin Epsilon Receptor Subunit Alpha		P12319	0.00926581	0.0257576	1.0	By_ingredient
SMTT01228	FGF10	5	Fibroblast Growth Factor 10		ENSG00000070193		0.0138668	0.0319753	1.0	By_ingredient
SMTT01232	FGF2		fibroblast growth factor 2	Fibroblast Growth Factor 2		P09038	0.063104	0.0863385	1.0	By_ingredient
SMTT01239	FGFR1	8	Fibroblast Growth Factor Receptor 1	Fibroblast Growth Factor Receptor 1	ENSG00000077782	P11362	0.00926581	0.0257576	1.0	By_ingredient
SMTT01262	FLT1		fms related tyrosine kinase 1	Vascular Endothelial Growth Factor Receptor 1		P17948	0.0275434	0.0481923	1.0	By_ingredient
SMTT01272	FOS	14	Fos Proto-oncogene, AP-1 Transcription Factor Subunit	Proto-oncogene C-Fos	ENSG00000170345	P01100	0.0170212	0.0357281	1.0	By_ingredient
SMTT01282	FOXO1	13	Forkhead Box O1		ENSG00000150907		0.00926581	0.0257576	1.0	By_ingredient
SMTT01311	FYN		FYN proto-oncogene, Src family tyrosine kinase	Tyrosine-protein Kinase Fyn		P06241	0.00926581	0.0257576	1.0	By_ingredient
SMTT01317	G6PD	X	Glucose-6-phosphate Dehydrogenase	Glucose-6-phosphate 1-dehydrogenase	ENSG00000160211	P11413	0.0365568	0.058054	1.0	By_ingredient
SMTT01355	GCLC	6	Glutamate-cysteine Ligase Catalytic Subunit	Glutamate--cysteine Ligase Catalytic Subunit	ENSG00000001084	P48506	0.0138668	0.0319753	1.0	By_ingredient
SMTT01380	GJA1	6	Gap Junction Protein Alpha 1	Gap Junction Alpha-1 Protein	ENSG00000152661	P17302	0.00187152	0.0111632	1.0	By_ingredient
SMTT01391	GLA	X	Galactosidase Alpha	Alpha-galactosidase A	ENSG00000102393	P06280	0.00926581	0.0257576	1.0	By_ingredient
SMTT01464	GRIA2		glutamate ionotropic receptor AMPA type subunit 2	Glutamate Receptor 2		P42262	0.73592	0.760736	1.0	By_ingredient
SMTT01483	GSK3B		glycogen synthase kinase 3 beta	Glycogen Synthase Kinase-3 Beta		P49841	0.234295	0.262789	1.0	By_ingredient
SMTT01488	GSTA2		glutathione S-transferase alpha 2	Glutathione S-transferase A2		P09210	0.0320605	0.0530252	1.0	By_ingredient
SMTT01489	GSTM1		glutathione S-transferase mu 1	Glutathione S-transferase Mu 1		P09488	0.00114144	0.00799876	1.0	By_ingredient
SMTT01490	GSTM2		glutathione S-transferase mu 2	Glutathione S-transferase Mu 2		P28161	0.000211338	0.00245889	1.0	By_ingredient
SMTT01491	GSTP1		glutathione S-transferase pi 1	Glutathione S-transferase P		P09211	8.18e-06	0.000242	0.722948	By_ingredient
SMTT01550	HIF1A		hypoxia inducible factor 1 subunit alpha	Hypoxia-inducible Factor 1-alpha		Q16665	0.0046375	0.0183345	1.0	By_ingredient
SMTT01567	HMGCR		3-hydroxy-3-methylglutaryl-CoA reductase	3-hydroxy-3-methylglutaryl-coenzyme A Reductase		P04035	0.00187152	0.0111632	1.0	By_ingredient
SMTT01569	HMOX1	22	Heme Oxygenase 1	Heme Oxygenase 1	ENSG00000100292	P09601	0.000261339	0.00284974	1.0	By_ingredient
SMTT01611	HSD3B1		dehydrogenase, 3 beta- and steroid delta-isomerase 1	3 Beta-hydroxysteroid Dehydrogenase/Delta 5-->4-isomerase Type 1		P14060	0.00926581	0.0257576	1.0	By_ingredient
SMTT01612	HSD3B2	1	Hydroxy-delta-5-steroid Dehydrogenase, 3 Beta- And Steroid Delta-isomerase 2	3 Beta-hydroxysteroid Dehydrogenase/Delta 5-->4-isomerase Type 2	ENSG00000203859	P26439	0.0230055	0.0428653	1.0	By_ingredient
SMTT01614	HSF1		heat shock transcription factor 1	Heat Shock Factor Protein 1		Q00613	0.0138668	0.0319753	1.0	By_ingredient
SMTT01618	HSPA5		heat shock protein family A (Hsp70) member 5	Endoplasmic reticulum chaperone BiP		P11021	0.000586394	0.00494754	1.0	By_ingredient
SMTT01620	HSPB1	7	Heat Shock Protein Family B (small) Member 1	Heat Shock Protein Beta-1	ENSG00000106211	P04792	0.0230055	0.0428653	1.0	By_ingredient
SMTT01630	HTT	4	Huntingtin	Huntingtin	ENSG00000197386	P42858	0.00464357	0.0183345	1.0	By_ingredient
SMTT01638	ICAM1		intercellular adhesion molecule 1	Intercellular Adhesion Molecule 1		P05362	0.0108635	0.0277956	1.0	By_ingredient
SMTT01652	IFNG		interferon gamma	Interferon Gamma		P01579	0.105751	0.130891	1.0	By_ingredient
SMTT01664	IGF1R	15	Insulin Like Growth Factor 1 Receptor	Insulin-like Growth Factor 1 Receptor	ENSG00000140443	P08069	0.0543363	0.0772065	1.0	By_ingredient
SMTT01665	IGF2	11	Insulin Like Growth Factor 2		ENSG00000167244		0.0184467	0.037439	1.0	By_ingredient
SMTT01668	IGFBP3		insulin like growth factor binding protein 3	Insulin-like Growth Factor-binding Protein 3		P17936	0.0138668	0.0319753	1.0	By_ingredient
SMTT01671	IGHG1		immunoglobulin heavy constant gamma 1	Immunoglobulin heavy constant gamma 1		P01857	0.0447478	0.0670181	1.0	By_ingredient
SMTT01679	IKBKB	8	Inhibitor Of Nuclear Factor Kappa B Kinase Subunit Beta	Inhibitor Of Nuclear Factor Kappa-B Kinase Subunit Beta	ENSG00000104365	O14920	0.000586394	0.00494754	1.0	By_ingredient
SMTT01682	IL10	1	Interleukin 10	Interleukin-10	ENSG00000136634	P22301	0.00010428	0.00149955	1.0	By_ingredient
SMTT01696	IL1A		interleukin 1 alpha	Interleukin-1 Alpha		P01583	0.0320605	0.0530252	1.0	By_ingredient
SMTT01697	IL1B		interleukin 1 beta	Interleukin-1 Beta		P01584	0.0185499	0.0375725	1.0	By_ingredient
SMTT01700	IL2		interleukin 2	Interleukin-2		P60568	0.105751	0.130891	1.0	By_ingredient
SMTT01710	IL4		interleukin 4	Interleukin-4		P05112	0.122267	0.147889	1.0	By_ingredient
SMTT01712	IL6	7	Interleukin 6	Interleukin-6	ENSG00000136244	P05231	0.00224741	0.0126144	1.0	By_ingredient
SMTT01724	INS	11	Insulin	Insulin	ENSG00000254647	P01308	0.000936733	0.00691749	1.0	By_ingredient
SMTT01726	INSR	19	Insulin Receptor	Insulin Receptor	ENSG00000171105	P06213	0.000316048	0.00324946	1.0	By_ingredient
SMTT01732	IRF1	5	Interferon Regulatory Factor 1		ENSG00000125347		0.00926581	0.0257576	1.0	By_ingredient
SMTT01756	ITGB2	21	Integrin Subunit Beta 2	Integrin Beta-2	ENSG00000160255	P05107	0.0138668	0.0319753	1.0	By_ingredient
SMTT01778	JUN		Jun proto-oncogene, AP-1 transcription factor subunit	Transcription Factor AP-1		P05412	1.6e-05	0.000395	1.0	By_ingredient
SMTT01803	KCNH2	7	Potassium Voltage-gated Channel Subfamily H Member 2	Potassium Voltage-gated Channel Subfamily H Member 2	ENSG00000055118	Q12809	0.869704	0.885402	1.0	By_ingredient
SMTT01833	KDR	4	Kinase Insert Domain Receptor	Vascular Endothelial Growth Factor Receptor 2	ENSG00000128052	P35968	0.569	0.60022	1.0	By_ingredient
SMTT01929	LDLR	19	Low Density Lipoprotein Receptor	Low-density Lipoprotein Receptor	ENSG00000130164	P01130	0.0543363	0.0772065	1.0	By_ingredient
SMTT01979	LPL	8	Lipoprotein Lipase	Lipoprotein Lipase	ENSG00000175445	P06858	0.00160901	0.010122	1.0	By_ingredient
SMTT02024	MAOA	X	Monoamine Oxidase A	Amine Oxidase [flavin-containing] A	ENSG00000189221	P21397	0.596443	0.626804	1.0	By_ingredient
SMTT02025	MAOB		monoamine oxidase B	Amine Oxidase [flavin-containing] B		P27338	0.375998	0.407474	1.0	By_ingredient
SMTT02028	MAP2K1	15	Mitogen-activated Protein Kinase Kinase 1	Dual Specificity Mitogen-activated Protein Kinase Kinase 1	ENSG00000169032	Q02750	0.0184467	0.037439	1.0	By_ingredient
SMTT02030	MAP3K1	5	Mitogen-activated Protein Kinase Kinase Kinase 1	Mitogen-activated Protein Kinase Kinase Kinase 1	ENSG00000095015	Q13233	0.00926581	0.0257576	1.0	By_ingredient
SMTT02033	MAPK1	22	Mitogen-activated Protein Kinase 1	Mitogen-activated Protein Kinase 1	ENSG00000100030	P28482	0.0155494	0.0339811	1.0	By_ingredient
SMTT02037	MAPK3		Mitogen-activated Protein Kinase 3	Mitogen-activated Protein Kinase 3		P27361	0.00798091	0.0239427	1.0	By_ingredient
SMTT02038	MAPK8		Mitogen-activated Protein Kinase 8	Mitogen-activated Protein Kinase 8		P45983	0.00010428	0.00149955	1.0	By_ingredient
SMTT02070	MDM2	12	MDM2 Proto-oncogene	E3 Ubiquitin-protein Ligase Mdm2	ENSG00000135679	Q00987	0.0275434	0.0481923	1.0	By_ingredient
SMTT02071	ME1		Malic enzyme 1	NADP-dependent Malic Enzyme		P48163	0.097378	0.122193	1.0	By_ingredient
SMTT02095	MGAM		maltase-glucoamylase	Maltase-glucoamylase, Intestinal		O43451	0.0499221	0.0723867	1.0	By_ingredient
SMTT02132	MMP1	11	Matrix Metallopeptidase 1	Interstitial Collagenase	ENSG00000196611	P03956	4.31e-06	0.000148	0.380918	By_ingredient
SMTT02133	MMP10		matrix metallopeptidase 10	Stromelysin-2		P09238	0.0138668	0.0319753	1.0	By_ingredient
SMTT02134	MMP13	11	Matrix Metallopeptidase 13	Collagenase 3	ENSG00000137745	P45452	0.0365568	0.058054	1.0	By_ingredient
SMTT02135	MMP14	14	Matrix Metallopeptidase 14	Matrix Metalloproteinase-14	ENSG00000157227	P50281	0.0320605	0.0530252	1.0	By_ingredient
SMTT02137	MMP2	16	Matrix Metallopeptidase 2	72 KDa Type IV Collagenase	ENSG00000087245	P08253	0.000726415	0.00577759	1.0	By_ingredient
SMTT02140	MMP3		Matrix Metallopeptidase 3	Stromelysin-1		P08254	0.00215293	0.0122522	1.0	By_ingredient
SMTT02141	MMP7		Matrix Metallopeptidase 7	Matrilysin		P09237	0.0138668	0.0319753	1.0	By_ingredient
SMTT02143	MMP9	20	Matrix Metallopeptidase 9	Matrix Metalloproteinase-9	ENSG00000100985	P14780	0.0170212	0.0357281	1.0	By_ingredient
SMTT02157	MPO	17	Myeloperoxidase	Myeloperoxidase	ENSG00000005381	P05164	0.00383745	0.0166833	1.0	By_ingredient
SMTT02180	MT-ND6		mitochondrially encoded NADH:ubiquinone oxidoreductase core subunit 6	NADH-ubiquinone Oxidoreductase Chain 6		P03923	0.00926581	0.0257576	1.0	By_ingredient
SMTT02203	MYC	8	MYC Proto-oncogene, BHLH Transcription Factor	Myc Proto-oncogene Protein	ENSG00000136997	P01106	0.00644654	0.021444	1.0	By_ingredient
SMTT02248	NCF1	7	Neutrophil Cytosolic Factor 1	Neutrophil Cytosol Factor 1	ENSG00000158517	P14598	0.000316048	0.00324946	1.0	By_ingredient
SMTT02251	NCOA1		nuclear receptor coactivator 1	Nuclear Receptor Coactivator 1		Q15788	0.85464	0.871542	1.0	By_ingredient
SMTT02314	NFKBIA	14	NFKB Inhibitor Alpha	NF-kappa-B Inhibitor Alpha	ENSG00000100906	P25963	0.0108635	0.0277956	1.0	By_ingredient
SMTT02349	NOS2		nitric oxide synthase 2	Nitric Oxide Synthase, Inducible		P35228	0.0137192	0.031756	1.0	By_ingredient
SMTT02350	NOS3		nitric oxide synthase 3	Nitric Oxide Synthase, Endothelial		P29474	0.0889276	0.113418	1.0	By_ingredient
SMTT02358	NPEPPS		aminopeptidase puromycin sensitive	Puromycin-sensitive Aminopeptidase		P55786	0.0138668	0.0319753	1.0	By_ingredient
SMTT02368	NQO1		NAD(P)H quinone dehydrogenase 1	NAD(P)H Dehydrogenase [quinone] 1		P15559	0.0410324	0.0628767	1.0	By_ingredient
SMTT02374	NR1I2		nuclear receptor subfamily 1 group I member 2	Nuclear Receptor Subfamily 1 Group I Member 2		O75469	0.000206883	0.00242498	1.0	By_ingredient
SMTT02375	NR1I3		nuclear receptor subfamily 1 group I member 3	Nuclear Receptor Subfamily 1 Group I Member 3		Q14994	0.000127188	0.00173043	1.0	By_ingredient
SMTT02402	NTRK2	9	Neurotrophic Receptor Tyrosine Kinase 2	BDNF/NT-3 Growth Factors Receptor	ENSG00000148053	Q16620	0.00926581	0.0257576	1.0	By_ingredient
SMTT02417	ODC1		ornithine decarboxylase 1	Ornithine Decarboxylase		P11926	0.00245308	0.0132173	1.0	By_ingredient
SMTT02428	OPRD1		opioid receptor delta 1	Delta-type Opioid Receptor		P41143	0.689965	0.71703	1.0	By_ingredient
SMTT02430	OPRM1		opioid receptor mu 1	Mu-type Opioid Receptor		P35372	0.780386	0.802571	1.0	By_ingredient
SMTT02464	PAM		peptidylglycine alpha-amidating monooxygenase	Peptidyl-glycine Alpha-amidating Monooxygenase		P19021	0.00464357	0.0183345	1.0	By_ingredient
SMTT02471	PARP1		poly(ADP-ribose) polymerase 1	Poly [ADP-ribose] Polymerase 1		P09874	0.0365568	0.058054	1.0	By_ingredient
SMTT02490	PCNA	20	Proliferating Cell Nuclear Antigen	Proliferating Cell Nuclear Antigen	ENSG00000132646	P12004	0.0365568	0.058054	1.0	By_ingredient
SMTT02495	PCYT1A	3	Phosphate Cytidylyltransferase 1, Choline, Alpha	Choline-phosphate Cytidylyltransferase A	ENSG00000161217	P49585	0.00464357	0.0183345	1.0	By_ingredient
SMTT02509	PDGFB	22	Platelet Derived Growth Factor Subunit B	Platelet-derived Growth Factor Subunit B	ENSG00000100311	P01127	0.00926581	0.0257576	1.0	By_ingredient
SMTT02511	PDGFRB	5	Platelet Derived Growth Factor Receptor Beta	Platelet-derived Growth Factor Receptor Beta	ENSG00000113721	P09619	0.00926581	0.0257576	1.0	By_ingredient
SMTT02519	PDX1	13	Pancreatic And Duodenal Homeobox 1		ENSG00000139515		0.00464357	0.0183345	1.0	By_ingredient
SMTT02550	PGR	11	Progesterone Receptor	Progesterone Receptor	ENSG00000082175	P06401	0.819156	0.838754	1.0	By_ingredient
SMTT02603	PLAT	8	Plasminogen Activator, Tissue Type	Tissue-type Plasminogen Activator	ENSG00000104368	P00750	0.063104	0.0863385	1.0	By_ingredient
SMTT02604	PLAU	10	Plasminogen Activator, Urokinase	Urokinase-type Plasminogen Activator	ENSG00000122861	P00749	0.000396255	0.00379068	1.0	By_ingredient
SMTT02615	PLG	6	Plasminogen	Plasminogen	ENSG00000122194	P00747	0.0184467	0.037439	1.0	By_ingredient
SMTT02668	PON1	7	Paraoxonase 1	Serum Paraoxonase/arylesterase 1	ENSG00000005421	P27169	0.000751657	0.00591553	1.0	By_ingredient
SMTT02671	POR	7	Cytochrome P450 Oxidoreductase	NADPH--cytochrome P450 Reductase	ENSG00000127948	P16435	3.34e-06	0.000123	0.295189	By_ingredient
SMTT02679	PPARA		peroxisome proliferator activated receptor alpha	Peroxisome Proliferator-activated Receptor Alpha		Q07869	0.00187152	0.0111632	1.0	By_ingredient
SMTT02680	PPARD		peroxisome proliferator activated receptor delta	Peroxisome Proliferator-activated Receptor Delta		Q03181	2.13e-05	0.000486	1.0	By_ingredient
SMTT02681	PPARG	3	Peroxisome Proliferator Activated Receptor Gamma	Peroxisome Proliferator-activated Receptor Gamma	ENSG00000132170	P37231	2.51e-07	1.69e-05	0.0221834	By_ingredient
SMTT02696	PPP3CA		protein phosphatase 3 catalytic subunit alpha	Serine/threonine-protein Phosphatase 2B Catalytic Subunit Alpha Isoform		Q08209	0.0138668	0.0319753	1.0	By_ingredient
SMTT02717	PRKCA		protein kinase C alpha	Protein Kinase C Alpha Type		P17252	0.000751657	0.00591553	1.0	By_ingredient
SMTT02718	PRKCB		protein kinase C beta	Protein Kinase C Beta Type		P05771	0.122267	0.147889	1.0	By_ingredient
SMTT02720	PRKCE		protein kinase C epsilon	Protein Kinase C Epsilon Type		Q02156	0.0138668	0.0319753	1.0	By_ingredient
SMTT02747	PRSS1	7	Serine Protease 1	Trypsin-1	ENSG00000204983	P07477	0.15131	0.177447	1.0	By_ingredient
SMTT02769	PTEN	10	Phosphatase And Tensin Homolog	Phosphatidylinositol 3,4,5-trisphosphate 3-phosphatase And Dual-specificity Protein Phosphatase PTEN	ENSG00000171862	P60484	0.000586394	0.00494754	1.0	By_ingredient
SMTT02772	PTGER3		prostaglandin E receptor 3	Prostaglandin E2 Receptor EP3 Subtype		P43115	0.0365568	0.058054	1.0	By_ingredient
SMTT02776	PTGS1		prostaglandin-endoperoxide synthase 1	Prostaglandin G/H Synthase 1		P23219	0.227579	0.255905	1.0	By_ingredient
SMTT02777	PTGS2		prostaglandin-endoperoxide synthase 2	Prostaglandin G/H Synthase 2		P35354	0.332928	0.3638	1.0	By_ingredient
SMTT02824	RAF1	3	Raf-1 Proto-oncogene, Serine/threonine Kinase	RAF Proto-oncogene Serine/threonine-protein Kinase	ENSG00000132155	P04049	0.000441129	0.00406422	1.0	By_ingredient
SMTT02836	RASA1	5	RAS P21 Protein Activator 1		ENSG00000145715		0.00464357	0.0183345	1.0	By_ingredient
SMTT02839	RASSF1	3	Ras Association Domain Family Member 1		ENSG00000068028		0.00464357	0.0183345	1.0	By_ingredient
SMTT02842	RB1	13	RB Transcriptional Corepressor 1	Retinoblastoma-associated Protein	ENSG00000139687	P06400	0.00136559	0.00905273	1.0	By_ingredient
SMTT02865	RELA		RELA proto-oncogene, NF-kB subunit	Transcription Factor P65		Q04206	0.00196731	0.0115615	1.0	By_ingredient
SMTT02947	RPS6KA1		ribosomal protein S6 kinase A1	Ribosomal Protein S6 Kinase Alpha-1		Q15418	0.00926581	0.0257576	1.0	By_ingredient
SMTT02950	RPSA	3	Ribosomal Protein SA	40S Ribosomal Protein SA	ENSG00000168028	P08865	0.00926581	0.0257576	1.0	By_ingredient
SMTT02967	RUNX2	6	Runt Related Transcription Factor 2		ENSG00000124813		0.00926581	0.0257576	1.0	By_ingredient
SMTT02969	RXRA		retinoid X receptor alpha	Retinoic Acid Receptor RXR-alpha		P19793	0.147492	0.173557	1.0	By_ingredient
SMTT03005	SCN5A	3	Sodium Voltage-gated Channel Alpha Subunit 5	Sodium Channel Protein Type 5 Subunit Alpha	ENSG00000183873	Q14524	0.994403	0.99615	1.0	By_ingredient
SMTT03028	SELE		selectin E	E-selectin		P16581	0.00245308	0.0132173	1.0	By_ingredient
SMTT03048	SERPINE1	7	Serpin Family E Member 1	Plasminogen Activator Inhibitor 1	ENSG00000106366	P05121	0.000936733	0.00691749	1.0	By_ingredient
SMTT03092	SIRT1		Sirtuin 1	NAD-dependent Protein Deacetylase Sirtuin-1		Q96EB6	0.0230055	0.0428653	1.0	By_ingredient
SMTT03127	SLC22A5	5	Solute Carrier Family 22 Member 5	Solute Carrier Family 22 Member 5	ENSG00000197375	O76082	0.00464357	0.0183345	1.0	By_ingredient
SMTT03155	SLC2A2	3	Solute Carrier Family 2 Member 2	Solute Carrier Family 2, Facilitated Glucose Transporter Member 2	ENSG00000163581	P11168	0.00464357	0.0183345	1.0	By_ingredient
SMTT03193	SLC6A2	16	Solute Carrier Family 6 Member 2	Sodium-dependent Noradrenaline Transporter	ENSG00000103546	P23975	0.825148	0.844283	1.0	By_ingredient
SMTT03195	SLC6A3	5	Solute Carrier Family 6 Member 3	Sodium-dependent Dopamine Transporter	ENSG00000142319	Q01959	0.945172	0.95374	1.0	By_ingredient
SMTT03196	SLC6A4		solute carrier family 6 member 4	Sodium-dependent Serotonin Transporter		P31645	0.873974	0.88933	1.0	By_ingredient
SMTT03253	SOAT1		sterol O-acyltransferase 1	Sterol O-acyltransferase 1		P35610	0.0138668	0.0319753	1.0	By_ingredient
SMTT03256	SOD1	21	Superoxide Dismutase 1	Superoxide Dismutase [Cu-Zn]	ENSG00000142168	P00441	5.12e-05	0.00092	1.0	By_ingredient
SMTT03302	SRD5A2	2	Steroid 5 Alpha-reductase 2	3-oxo-5-alpha-steroid 4-dehydrogenase 2	ENSG00000277893	P31213	0.0184467	0.037439	1.0	By_ingredient
SMTT03317	STAT1	2	Signal Transducer And Activator Of Transcription 1		ENSG00000115415		7.97e-06	0.000238	0.704389	By_ingredient
SMTT03319	STAT3	17	Signal Transducer And Activator Of Transcription 3	Signal Transducer And Activator Of Transcription 3	ENSG00000168610	P40763	0.0674577	0.0910003	1.0	By_ingredient
SMTT03347	SULT1E1		sulfotransferase family 1E member 1	Estrogen Sulfotransferase		P49888	0.0230055	0.0428653	1.0	By_ingredient
SMTT03391	TBK1	12	TANK Binding Kinase 1		ENSG00000183735		0.00464357	0.0183345	1.0	By_ingredient
SMTT03408	TBXA2R		thromboxane A2 receptor	Thromboxane A2 Receptor		P21731	0.00926581	0.0257576	1.0	By_ingredient
SMTT03420	TDP1	14	Tyrosyl-DNA Phosphodiesterase 1		ENSG00000042088		0.0275434	0.0481923	1.0	By_ingredient
SMTT03447	TGFB1	19	Transforming Growth Factor Beta 1	Transforming Growth Factor Beta-1	ENSG00000105329	P01137	0.114047	0.139566	1.0	By_ingredient
SMTT03461	THBD	20	Thrombomodulin	Thrombomodulin	ENSG00000178726	P07204	0.00926581	0.0257576	1.0	By_ingredient
SMTT03475	TLR4	9	Toll Like Receptor 4	Toll-like Receptor 4	ENSG00000136869	O00206	0.0275434	0.0481923	1.0	By_ingredient
SMTT03502	TNF		tumor necrosis factor	Tumor Necrosis Factor		P01375	2.33e-05	0.00052	1.0	By_ingredient
SMTT03526	TOP1		DNA topoisomerase I	DNA Topoisomerase 1		P11387	0.000586394	0.00494754	1.0	By_ingredient
SMTT03527	TOP2A	17	DNA Topoisomerase II Alpha	DNA Topoisomerase 2-alpha	ENSG00000131747	P11388	0.0138668	0.0319753	1.0	By_ingredient
SMTT03530	TP53	17	Tumor Protein P53	Cellular Tumor Antigen P53	ENSG00000141510	P04637	0.0226131	0.0424017	1.0	By_ingredient
SMTT03590	TRPV1		transient receptor potential cation channel subfamily V member 1	Transient Receptor Potential Cation Channel Subfamily V Member 1		Q8NER1	0.0275434	0.0481923	1.0	By_ingredient
SMTT03662	UCP2	11	Uncoupling Protein 2		ENSG00000175567		0.0184467	0.037439	1.0	By_ingredient
SMTT03665	UGT1A1	2	UDP Glucuronosyltransferase Family 1 Member A1		ENSG00000241635		0.0320605	0.0530252	1.0	By_ingredient
SMTT03701	VCAM1		vascular cell adhesion molecule 1	Vascular Cell Adhesion Protein 1		P19320	0.000324288	0.00331259	1.0	By_ingredient
SMTT03708	VEGFA		vascular endothelial growth factor A	Vascular Endothelial Growth Factor A		P15692	0.00213413	0.0122057	1.0	By_ingredient
SMTT03711	VIM	10	Vimentin	Vimentin	ENSG00000026025	P08670	0.00464357	0.0183345	1.0	By_ingredient
SMTT03764	XDH	2	Xanthine Dehydrogenase	Xanthine Dehydrogenase/oxidase	ENSG00000158125	P47989	5.2e-08	4.87e-06	0.00459576	By_ingredient
SMTT03844	CCK	3	Cholecystokinin		ENSG00000187094	P06307	0.0138668	0.0319753	1.0	By_ingredient
SMTT03845	CCNB1	5	Cyclin B1		ENSG00000134057	P14635	0.0931626	0.11784	1.0	By_ingredient
SMTT03850	EGR1	5	Early Growth Response 1		ENSG00000120738	P18146	0.0275434	0.0481923	1.0	By_ingredient
SMTT03857	ELK1	X	ELK1, ETS Transcription Factor		ENSG00000126767	P19419	0.000127188	0.00173043	1.0	By_ingredient
SMTT03875	BAK1	6	BCL2 Antagonist/killer 1		ENSG00000030110	Q16611	0.0365568	0.058054	1.0	By_ingredient
SMTT03877	BAX	19	BCL2 Associated X, Apoptosis Regulator		ENSG00000087088	Q07812	0.000237235	0.00266754	1.0	By_ingredient
SMTT03893	DIO1	1	Iodothyronine Deiodinase 1		ENSG00000211452	P49895	0.000316048	0.00324946	1.0	By_ingredient
SMTT03908	E2F1	20	E2F Transcription Factor 1		ENSG00000101412	Q01094	0.0230055	0.0428653	1.0	By_ingredient
SMTT03909	E2F2	1	E2F Transcription Factor 2		ENSG00000007968	Q14209	0.00464357	0.0183345	1.0	By_ingredient
SMTT03915	CLDN4	7	Claudin 4		ENSG00000189143	O14493	0.00464357	0.0183345	1.0	By_ingredient
SMTT03918	CASP9	1	Caspase 9		ENSG00000132906	P55211	0.0185499	0.0375725	1.0	By_ingredient
SMTT03920	RUNX1T1	8	RUNX1 Translocation Partner 1		ENSG00000079102	Q06455	0.000441129	0.00406422	1.0	By_ingredient
SMTT03924	IL6ST	5	Interleukin 6 Signal Transducer		ENSG00000134352	P40189	0.00464357	0.0183345	1.0	By_ingredient
SMTT03927	HAS2	8	Hyaluronan Synthase 2		ENSG00000170961	Q92819	1.92e-06	8.07e-05	0.16969	By_ingredient
SMTT03934	GAP43	3	Growth Associated Protein 43		ENSG00000172020	P17677	0.0230055	0.0428653	1.0	By_ingredient
SMTT03935	HK2	2	Hexokinase 2		ENSG00000159399	P52789	0.00464357	0.0183345	1.0	By_ingredient
SMTT03937	IRF3	19	Interferon Regulatory Factor 3		ENSG00000126456	Q14653	0.00926581	0.0257576	1.0	By_ingredient
SMTT03938	GCG	2	Glucagon		ENSG00000115263	P01275	0.0138668	0.0319753	1.0	By_ingredient
SMTT03944	GGT5	22	Gamma-glutamyltransferase 5		ENSG00000099998	P36269	0.0184467	0.037439	1.0	By_ingredient
SMTT03946	IVL	1	Involucrin		ENSG00000163207	P07476	0.0138668	0.0319753	1.0	By_ingredient
SMTT03947	JUNB	19	JunB Proto-oncogene, AP-1 Transcription Factor Subunit		ENSG00000171223	P17275	0.0138668	0.0319753	1.0	By_ingredient
SMTT03948	JUND	19	JunD Proto-oncogene, AP-1 Transcription Factor Subunit		ENSG00000130522	P17535	0.0138668	0.0319753	1.0	By_ingredient
SMTT03952	FABP1	2	Fatty Acid Binding Protein 1		ENSG00000163586	P07148	0.00926581	0.0257576	1.0	By_ingredient
SMTT03954	HOXD1	2	Homeobox D1		ENSG00000128645	Q9GZZ0	0.00464357	0.0183345	1.0	By_ingredient
SMTT03969	FOSB	19	FosB Proto-oncogene, AP-1 Transcription Factor Subunit		ENSG00000125740	P53539	0.0138668	0.0319753	1.0	By_ingredient
SMTT03970	FOSL2	2	FOS Like 2, AP-1 Transcription Factor Subunit		ENSG00000075426	P15408	0.0230055	0.0428653	1.0	By_ingredient
SMTT03972	CXCL2	4	C-X-C Motif Chemokine Ligand 2		ENSG00000081041	P19875	0.00926581	0.0257576	1.0	By_ingredient
SMTT03986	SAA2	11	Serum Amyloid A2		ENSG00000134339	P02735	0.0230055	0.0428653	1.0	By_ingredient
SMTT03990	NFE2L2	2	Nuclear Factor, Erythroid 2 Like 2		ENSG00000116044	Q16236	0.0410324	0.0628767	1.0	By_ingredient
SMTT03993	SCD	10	Stearoyl-CoA Desaturase		ENSG00000099194	O00767	0.00464357	0.0183345	1.0	By_ingredient
SMTT03996	PLCG1	20	Phospholipase C Gamma 1		ENSG00000124181	P19174	0.0138668	0.0319753	1.0	By_ingredient
SMTT04001	NKX3-1	8	NK3 Homeobox 1		ENSG00000167034	Q99801	0.00926581	0.0257576	1.0	By_ingredient
SMTT04010	CXCL11	4	C-X-C Motif Chemokine Ligand 11		ENSG00000169248	O14625	0.00464357	0.0183345	1.0	By_ingredient
SMTT04022	RASGRF2	5	Ras Protein Specific Guanine Nucleotide Releasing Factor 2		ENSG00000113319	O14827	0.0454875	0.0677712	1.0	By_ingredient
SMTT04023	RBP2	3	Retinol Binding Protein 2		ENSG00000114113	P50120	0.00926581	0.0257576	1.0	By_ingredient
SMTT04024	OLR1	12	Oxidized Low Density Lipoprotein Receptor 1		ENSG00000173391	P78380	0.0138668	0.0319753	1.0	By_ingredient
SMTT04030	CITED1	X	Cbp/p300 Interacting Transactivator With Glu/Asp Rich Carboxy-terminal Domain 1		ENSG00000125931	Q99966	0.00464357	0.0183345	1.0	By_ingredient
SMTT04035	MAPK7	17	Mitogen-activated Protein Kinase 7		ENSG00000166484	Q13164	0.0184467	0.037439	1.0	By_ingredient
SMTT04036	MUC5AC	11	Mucin 5AC, Oligomeric Mucus/gel-forming		ENSG00000215182	P98088	0.00464357	0.0183345	1.0	By_ingredient
SMTT04037	PCOLCE	7	Procollagen C-endopeptidase Enhancer		ENSG00000106333	Q15113	0.0230055	0.0428653	1.0	By_ingredient
SMTT04041	MYB	6	MYB Proto-oncogene, Transcription Factor		ENSG00000118513	P10242	0.00464357	0.0183345	1.0	By_ingredient
SMTT04047	PYY	17	Peptide YY		ENSG00000131096	P10082	0.00464357	0.0183345	1.0	By_ingredient
SMTT04051	RPS6KB1	17	Ribosomal Protein S6 Kinase B1		ENSG00000108443	P23443	0.00464357	0.0183345	1.0	By_ingredient
SMTT04055	PSMD3	17	Proteasome 26S Subunit, Non-ATPase 3		ENSG00000108344	O43242	0.000211338	0.00245889	1.0	By_ingredient
SMTT04057	SREBF2	22	Sterol Regulatory Element Binding Transcription Factor 2		ENSG00000198911	Q12772	0.00926581	0.0257576	1.0	By_ingredient
SMTT04063	FOSL1	11	FOS Like 1, AP-1 Transcription Factor Subunit		ENSG00000175592	P15407	0.00926581	0.0257576	1.0	By_ingredient
SMTT04068	UCP3	11	Uncoupling Protein 3		ENSG00000175564	P55916	0.00926581	0.0257576	1.0	By_ingredient
SMTT04074	SLC2A4	17	Solute Carrier Family 2 Member 4		ENSG00000181856	P14672	0.00187152	0.0111632	1.0	By_ingredient
SMTT04076	TEP1	14	Telomerase Associated Protein 1		ENSG00000129566	Q99973	0.00215293	0.0122522	1.0	By_ingredient
SMTT04080	SLPI	20	Secretory Leukocyte Peptidase Inhibitor		ENSG00000124107	P03973	0.00464357	0.0183345	1.0	By_ingredient
SMTT04085	TIMP1	X	TIMP Metallopeptidase Inhibitor 1		ENSG00000102265	P01033	0.0543363	0.0772065	1.0	By_ingredient
SMTT04086	TIMP2	17	TIMP Metallopeptidase Inhibitor 2		ENSG00000035862	P16035	0.0230055	0.0428653	1.0	By_ingredient
SMTT04090	SOD3	4	Superoxide Dismutase 3		ENSG00000109610	P08294	0.0230055	0.0428653	1.0	By_ingredient
SMTT04091	SP1	12	Sp1 Transcription Factor		ENSG00000185591	P08047	2.13e-05	0.000486	1.0	By_ingredient
SMTT04094	SPP1	4	Secreted Phosphoprotein 1		ENSG00000118785	P10451	0.0275434	0.0481923	1.0	By_ingredient
SMTT04098	MADD	11	MAP Kinase Activating Death Domain		ENSG00000110514	Q8WXG6	0.00464357	0.0183345	1.0	By_ingredient
SMTT04106	AHSA1	14	Activator Of HSP90 ATPase Activity 1		ENSG00000100591	O95433	0.00018267	0.00222436	1.0	By_ingredient
SMTT04108	RPS6KA5	14	Ribosomal Protein S6 Kinase A5		ENSG00000100784	O75582	0.00464357	0.0183345	1.0	By_ingredient
SMTT04111	CAMKK2	12	Calcium/calmodulin Dependent Protein Kinase Kinase 2		ENSG00000110931	Q96RR4	0.0230055	0.0428653	1.0	By_ingredient
SMTT04114	DCAF5	14	DDB1 And CUL4 Associated Factor 5		ENSG00000139990	Q96JK2	0.00464357	0.0183345	1.0	By_ingredient
SMTT04126	EEF1E1	6	Eukaryotic Translation Elongation Factor 1 Epsilon 1		ENSG00000124802	O43324	0.00926581	0.0257576	1.0	By_ingredient
SMTT04129	BCL2L10	15	BCL2 Like 10		ENSG00000137875	Q9HD36	0.0138668	0.0319753	1.0	By_ingredient
SMTT04138	PIM2	X	Pim-2 Proto-oncogene, Serine/threonine Kinase		ENSG00000102096	Q9P1W9	0.00464357	0.0183345	1.0	By_ingredient
SMTT04177	HERC5	4	HECT And RLD Domain Containing E3 Ubiquitin Protein Ligase 5		ENSG00000138646	Q9UII4	0.00277177	0.0141658	1.0	By_ingredient
SMTT04178	BBC3	19	BCL2 Binding Component 3		ENSG00000105327	Q9BXH1	0.0230055	0.0428653	1.0	By_ingredient
SMTT04186	AZIN1	8	Antizyme Inhibitor 1		ENSG00000155096	O14977	0.00464357	0.0183345	1.0	By_ingredient
SMTT04195	OXSM	3	3-oxoacyl-ACP Synthase, Mitochondrial		ENSG00000151093	Q9NWU1	0.00464357	0.0183345	1.0	By_ingredient
SMTT04225	GDPD5	11	Glycerophosphodiester Phosphodiesterase Domain Containing 5		ENSG00000158555	Q8WTR4	0.00464357	0.0183345	1.0	By_ingredient
SMTT04237	PLB1	2	Phospholipase B1		ENSG00000163803	Q6P1J6	0.177732	0.204715	1.0	By_ingredient
SMTT04239	ENPP7	17	Ectonucleotide Pyrophosphatase/phosphodiesterase 7		ENSG00000182156	Q6UWV6	0.00926581	0.0257576	1.0	By_ingredient
SMTT04243	DHFRP1	18	Dihydrofolate Reductase Pseudogene 1			P00374	0.0138668	0.0319753	1.0	By_ingredient
SMTT04245	GUSBP1	5	Glucuronidase, Beta Pseudogene 1		ENSG00000183666	Q15486	0.0138668	0.0319753	1.0	By_ingredient
SMTT04258	PRXC1A		Peroxidase C1A			P00433	6.38e-05	0.00107	1.0	By_ingredient
SMTT04260	gyrB		DNA Gyrase Subunit B			P0AES6	0.00926581	0.0257576	1.0	By_ingredient
SMTT04264	GRLF1		Glucocorticoid Receptor DNA-binding Factor 1/Rho GTPase activating protein 35			Q9NRY4	0.00464357	0.0183345	1.0	By_ingredient
SMTT04266	CDC2		Cell Division Control Protein 2 Homolog/cyclin dependent kinase 1			P06493	9.45e-06	0.00027	0.835191	By_ingredient
SMTT04267	GDE5		Putative Glycerophosphodiester Phosphodiesterase 5/glycerophosphocholine phosphodiesterase 1			Q9NPB8	0.00926581	0.0257576	1.0	By_ingredient
SMTT04275	crn-7		Cell-death-related Nuclease 7			P34387	0.00464357	0.0183345	1.0	By_ingredient
