# Supplementary material for: A Network Pharmacology-Based Study on Irritable Bowel Syndrome Prevention and Treatment Utilizing Shenling Baizhu Powder
Source: Biomed Res Int. 2021 Nov 23;2021:4579850. doi: 10.1155/2021/4579850 (PMC8632384; doi:10.1155/2021/4579850)
Supplement: Supplementary Materials — Please find detailed data in the supplementary file, including the original data of SymMap, metabolomics, and molecular docking of Shenling Baizhu powder. “Shenling Baizhu powder SymMap” includes all herbal targets and combined targets. “Shenling Baizhu powder metabolomics” includes two-dimensional structural data analysis. “Molecular docking” involves molecule-target docking and the results. [file 4579850.f1.zip › Data in brief/1. Shenling Baizhu powder Symmap/Yam.csv]

Target id	Gene symbol	Chromosome	Gene name	Protein name	Ensembl id	UniProt id	P_value	FDR(BH)	FDR(Bonferroni)	Relationship
SMTT00010	ABAT	16	4-aminobutyrate Aminotransferase	4-aminobutyrate Aminotransferase, Mitochondrial	ENSG00000183044	P80404	1.44e-11	4.24e-09	1.27e-06	By_ingredient
SMTT00011	ABCA1	9	ATP Binding Cassette Subfamily A Member 1	ATP-binding Cassette Sub-family A Member 1	ENSG00000165029	O95477	0.0122096	0.0295348	1.0	By_ingredient
SMTT00023	ABCC2	10	ATP Binding Cassette Subfamily C Member 2	Canalicular Multispecific Organic Anion Transporter 1	ENSG00000023839	Q92887	0.000367394	0.00359147	1.0	By_ingredient
SMTT00051	ACHE		acetylcholinesterase (Yt blood group)	Acetylcholinesterase		P22303	0.215235	0.24318	1.0	By_ingredient
SMTT00056	ACPP		acid phosphatase, prostate	Prostatic Acid Phosphatase		P15309	7.7e-06	0.000232	0.680526	By_ingredient
SMTT00102	ADRA1A		adrenergic, alpha-1A-, receptor	Alpha-1A Adrenergic Receptor		P35348	0.219643	0.247713	1.0	By_ingredient
SMTT00103	ADRA2A		adrenergic, alpha-2A-, receptor	Alpha-2A Adrenergic Receptor		P08913	0.0970909	0.121909	1.0	By_ingredient
SMTT00105	ADRB1		adrenergic, beta-1-, receptor	Beta-1 Adrenergic Receptor		P08588	0.0745607	0.0985321	1.0	By_ingredient
SMTT00106	ADRB2		adrenergic, beta-2-, receptor, surface	Beta-2 Adrenergic Receptor		P07550	0.507968	0.539938	1.0	By_ingredient
SMTT00129	AHR		Aryl hydrocarbon receptor	Aryl Hydrocarbon Receptor		P35869	0.0936349	0.118326	1.0	By_ingredient
SMTT00139	AKR1B1		Aldo-keto reductase family 1, member B1 (aldose reductase)	Aldose Reductase		P15121	7.65e-07	4.01e-05	0.0676	By_ingredient
SMTT00144	AKT1	14	AKT Serine/threonine Kinase 1	RAC-alpha Serine/threonine-protein Kinase	ENSG00000142208	P31749	0.208342	0.236191	1.0	By_ingredient
SMTT00148	ALAS1		5'-aminolevulinate synthase 1	5-aminolevulinate Synthase, Nonspecific, Mitochondrial		P13196	0.0242713	0.0442718	1.0	By_ingredient
SMTT00149	ALAS2	X	5'-aminolevulinate Synthase 2	5-aminolevulinate Synthase, Erythroid-specific, Mitochondrial	ENSG00000158578	P22557	0.036187	0.057617	1.0	By_ingredient
SMTT00153	ALDH2	12	Aldehyde Dehydrogenase 2 Family Member	Aldehyde Dehydrogenase, Mitochondrial	ENSG00000111275	P05091	0.0991895	0.12411	1.0	By_ingredient
SMTT00175	ALOX5		arachidonate 5-lipoxygenase	Arachidonate 5-lipoxygenase		P09917	0.000805716	0.00621964	1.0	By_ingredient
SMTT00184	AMD1		adenosylmethionine decarboxylase 1	S-adenosylmethionine Decarboxylase Proenzyme		P17707	0.036187	0.057617	1.0	By_ingredient
SMTT00194	AMY2A		amylase, alpha 2A(pancreatic)	Pancreatic Alpha-amylase		P04746	0.000274758	0.00295811	1.0	By_ingredient
SMTT00244	AR	X	Androgen Receptor	Androgen Receptor	ENSG00000169083	P10275	0.973814	0.978764	1.0	By_ingredient
SMTT00295	ATP2C1	3	ATPase Secretory Pathway Ca2+ Transporting 1	Calcium-transporting ATPase Type 2C Member 1	ENSG00000017260	P98194	2.6e-05	0.000565	1.0	By_ingredient
SMTT00341	BAD		BCL2 associated agonist of cell death	Bcl2-associated Agonist Of Cell Death		Q92934	0.0537904	0.0765798	1.0	By_ingredient
SMTT00356	BCHE		butyrylcholinesterase	Cholinesterase		P06276	5.53e-08	5.13e-06	0.00489	By_ingredient
SMTT00361	BCL2	18	BCL2, Apoptosis Regulator	Apoptosis Regulator Bcl-2	ENSG00000171791	P10415	0.121188	0.146737	1.0	By_ingredient
SMTT00436	CA2	8	Carbonic Anhydrase 2	Carbonic Anhydrase 2	ENSG00000104267	P00918	0.699222	0.725745	1.0	By_ingredient
SMTT00461	CALM3	19	Calmodulin 3		ENSG00000160014		0.595578	0.626001	1.0	By_ingredient
SMTT00487	CAT	11	Catalase	Catalase	ENSG00000121691	P04040	0.00376451	0.0165516	1.0	By_ingredient
SMTT00520	CCNA2		cyclin A2	Cyclin-A2		P20248	0.876057	0.891295	1.0	By_ingredient
SMTT00554	CD86		CD86 molecule	T-lymphocyte Activation Antigen CD86		P42081	0.0420906	0.0639873	1.0	By_ingredient
SMTT00558	CDC25B		cell division cycle 25B	M-phase Inducer Phosphatase 2		P30305	0.000655952	0.00535152	1.0	By_ingredient
SMTT00577	CDKN1A	6	Cyclin Dependent Kinase Inhibitor 1A	Cyclin-dependent Kinase Inhibitor 1	ENSG00000124762	P38936	0.241727	0.270411	1.0	By_ingredient
SMTT00636	CHRM1		cholinergic receptor muscarinic 1	Muscarinic Acetylcholine Receptor M1		P11229	0.170786	0.197525	1.0	By_ingredient
SMTT00809	CRYZ		crystallin zeta	Quinone Oxidoreductase		Q08257	0.00612339	0.0208847	1.0	By_ingredient
SMTT00826	CTH	1	Cystathionine Gamma-lyase	Cystathionine Gamma-lyase	ENSG00000116761	P32929	5.74e-07	3.18e-05	0.0507	By_ingredient
SMTT00830	CTNNB1	3	Catenin Beta 1	Catenin Beta-1	ENSG00000168036	P35222	0.0767667	0.100731	1.0	By_ingredient
SMTT00838	CTSD	11	Cathepsin D	Cathepsin D	ENSG00000117984	P07339	1.03e-14	5.23e-12	9.1e-10	By_ingredient
SMTT00851	CXCL8		C-X-C motif chemokine ligand 8	Interleukin-8		P10145	0.158106	0.184482	1.0	By_ingredient
SMTT00865	CYP1A1		cytochrome P450 family 1 subfamily A member 1	Cytochrome P450 1A1		P04798	0.00058829	0.00495979	1.0	By_ingredient
SMTT00867	CYP1B1	2	Cytochrome P450 Family 1 Subfamily B Member 1	Cytochrome P450 1B1	ENSG00000138061	Q16678	0.036187	0.057617	1.0	By_ingredient
SMTT00879	CYP2D6		cytochrome P450 family 2 subfamily D member 6	Cytochrome P450 2D6		P10635	0.0122096	0.0295348	1.0	By_ingredient
SMTT00880	CYP2E1		cytochrome P450 family 2 subfamily E member 1	Cytochrome P450 2E1		P05181	0.0019726	0.0115855	1.0	By_ingredient
SMTT00940	DHCR7	11	7-dehydrocholesterol Reductase	7-dehydrocholesterol Reductase	ENSG00000172893	Q9UBM7	0.00612339	0.0208847	1.0	By_ingredient
SMTT01084	EIF6		eukaryotic translation initiation factor 6	Eukaryotic Translation Initiation Factor 6		P56537	0.163268	0.189794	1.0	By_ingredient
SMTT01086	ELANE	19	Elastase, Neutrophil Expressed	Neutrophil Elastase	ENSG00000197561	P08246	0.0242713	0.0442718	1.0	By_ingredient
SMTT01103	ENOX2		ecto-NOX disulfide-thiol exchanger 2	Ecto-NOX Disulfide-thiol Exchanger 2		Q16206	0.00612339	0.0208847	1.0	By_ingredient
SMTT01141	ESR1	6	Estrogen Receptor 1	Estrogen Receptor	ENSG00000091831	P03372	0.892442	0.906223	1.0	By_ingredient
SMTT01142	ESR2		estrogen receptor 2	Estrogen Receptor Beta		Q92731	0.891309	0.905146	1.0	By_ingredient
SMTT01202	FASN		fatty acid synthase	Fatty Acid Synthase		P49327	0.147686	0.173757	1.0	By_ingredient
SMTT01272	FOS	14	Fos Proto-oncogene, AP-1 Transcription Factor Subunit	Proto-oncogene C-Fos	ENSG00000170345	P01100	0.232333	0.260784	1.0	By_ingredient
SMTT01305	FUS	16	FUS RNA Binding Protein		ENSG00000089280		0.00612339	0.0208847	1.0	By_ingredient
SMTT01348	GATM	15	Glycine Amidinotransferase	Glycine Amidinotransferase, Mitochondrial	ENSG00000171766	P50440	1.94e-08	2.19e-06	0.00171	By_ingredient
SMTT01392	GLB1	3	Galactosidase Beta 1		ENSG00000170266		2.17e-10	4.72e-08	1.92e-05	By_ingredient
SMTT01426	GNMT	6	Glycine N-methyltransferase	Glycine N-methyltransferase	ENSG00000124713	Q14749	0.110198	0.135505	1.0	By_ingredient
SMTT01436	GOT1		glutamic-oxaloacetic transaminase 1	Aspartate Aminotransferase, Cytoplasmic		P17174	6.11e-09	8.41e-07	0.00054	By_ingredient
SMTT01456	GPT		glutamic--pyruvic transaminase	Alanine Aminotransferase 1		P24298	0.000178869	0.0021914	1.0	By_ingredient
SMTT01457	GPT2	16	Glutamic--pyruvic Transaminase 2	Alanine Aminotransferase 2	ENSG00000166123	Q8TD30	0.0479583	0.070304	1.0	By_ingredient
SMTT01463	GRIA1		glutamate ionotropic receptor AMPA type subunit 1	Glutamate Receptor 1		P42261	0.0019726	0.0115855	1.0	By_ingredient
SMTT01464	GRIA2		glutamate ionotropic receptor AMPA type subunit 2	Glutamate Receptor 2		P42262	0.0970909	0.121909	1.0	By_ingredient
SMTT01468	GRIN1	9	Glutamate Ionotropic Receptor NMDA Type Subunit 1	Glutamate Receptor Ionotropic, NMDA 1	ENSG00000176884	Q05586	4.83e-06	0.000162	0.426875	By_ingredient
SMTT01472	GRIN3A		glutamate ionotropic receptor NMDA type subunit 3A	Glutamate Receptor Ionotropic, NMDA 3A		Q8TCU5	0.00130155	0.00875694	1.0	By_ingredient
SMTT01483	GSK3B		glycogen synthase kinase 3 beta	Glycogen Synthase Kinase-3 Beta		P49841	0.892661	0.906404	1.0	By_ingredient
SMTT01550	HIF1A		hypoxia inducible factor 1 subunit alpha	Hypoxia-inducible Factor 1-alpha		Q16665	0.12646	0.152174	1.0	By_ingredient
SMTT01567	HMGCR		3-hydroxy-3-methylglutaryl-CoA reductase	3-hydroxy-3-methylglutaryl-coenzyme A Reductase		P04035	0.0824237	0.106614	1.0	By_ingredient
SMTT01652	IFNG		interferon gamma	Interferon Gamma		P01579	0.137137	0.163035	1.0	By_ingredient
SMTT01671	IGHG1		immunoglobulin heavy constant gamma 1	Immunoglobulin heavy constant gamma 1		P01857	0.257307	0.286368	1.0	By_ingredient
SMTT01697	IL1B		interleukin 1 beta	Interleukin-1 Beta		P01584	0.0310192	0.0519622	1.0	By_ingredient
SMTT01710	IL4		interleukin 4	Interleukin-4		P05112	0.012668	0.0302463	1.0	By_ingredient
SMTT01711	IL5		interleukin 5	Interleukin-5		P05113	0.0420906	0.0639873	1.0	By_ingredient
SMTT01712	IL6	7	Interleukin 6	Interleukin-6	ENSG00000136244	P05231	0.0462104	0.0685258	1.0	By_ingredient
SMTT01778	JUN		Jun proto-oncogene, AP-1 transcription factor subunit	Transcription Factor AP-1		P05412	0.341893	0.372988	1.0	By_ingredient
SMTT01803	KCNH2	7	Potassium Voltage-gated Channel Subfamily H Member 2	Potassium Voltage-gated Channel Subfamily H Member 2	ENSG00000055118	Q12809	0.274108	0.303532	1.0	By_ingredient
SMTT01926	LCT	2	Lactase	Lactase-phlorizin Hydrolase	ENSG00000115850	P09848	0.000118303	0.00164681	1.0	By_ingredient
SMTT02024	MAOA	X	Monoamine Oxidase A	Amine Oxidase [flavin-containing] A	ENSG00000189221	P21397	0.0314965	0.0524247	1.0	By_ingredient
SMTT02025	MAOB		monoamine oxidase B	Amine Oxidase [flavin-containing] B		P27338	0.226131	0.254427	1.0	By_ingredient
SMTT02071	ME1		Malic enzyme 1	NADP-dependent Malic Enzyme		P48163	0.00792863	0.0238489	1.0	By_ingredient
SMTT02142	MMP8		Matrix Metallopeptidase 8	Neutrophil Collagenase		P22894	0.0101746	0.0269322	1.0	By_ingredient
SMTT02157	MPO	17	Myeloperoxidase	Myeloperoxidase	ENSG00000005381	P05164	0.115651	0.141164	1.0	By_ingredient
SMTT02194	MUC1	1	Mucin 1, Cell Surface Associated		ENSG00000185499		0.0122096	0.0295348	1.0	By_ingredient
SMTT02251	NCOA1		nuclear receptor coactivator 1	Nuclear Receptor Coactivator 1		Q15788	0.107491	0.132765	1.0	By_ingredient
SMTT02349	NOS2		nitric oxide synthase 2	Nitric Oxide Synthase, Inducible		P35228	0.790958	0.812735	1.0	By_ingredient
SMTT02374	NR1I2		nuclear receptor subfamily 1 group I member 2	Nuclear Receptor Subfamily 1 Group I Member 2		O75469	0.142428	0.168337	1.0	By_ingredient
SMTT02379	NR3C1	5	Nuclear Receptor Subfamily 3 Group C Member 1	Glucocorticoid Receptor	ENSG00000113580	P04150	0.249097	0.277945	1.0	By_ingredient
SMTT02380	NR3C2	4	Nuclear Receptor Subfamily 3 Group C Member 2	Mineralocorticoid Receptor	ENSG00000151623	P08235	0.0476017	0.0699727	1.0	By_ingredient
SMTT02428	OPRD1		opioid receptor delta 1	Delta-type Opioid Receptor		P41143	0.786778	0.808806	1.0	By_ingredient
SMTT02430	OPRM1		opioid receptor mu 1	Mu-type Opioid Receptor		P35372	0.591005	0.621563	1.0	By_ingredient
SMTT02550	PGR	11	Progesterone Receptor	Progesterone Receptor	ENSG00000082175	P06401	0.00181391	0.0109939	1.0	By_ingredient
SMTT02594	PKLR	1	Pyruvate Kinase L/R	Pyruvate Kinase PKLR	ENSG00000143627	P30613	0.00370606	0.0163746	1.0	By_ingredient
SMTT02598	PLA2G4A		phospholipase A2 group IVA	Cytosolic Phospholipase A2		P47712	0.0302473	0.0511217	1.0	By_ingredient
SMTT02604	PLAU	10	Plasminogen Activator, Urokinase	Urokinase-type Plasminogen Activator	ENSG00000122861	P00749	0.1735	0.200388	1.0	By_ingredient
SMTT02696	PPP3CA		protein phosphatase 3 catalytic subunit alpha	Serine/threonine-protein Phosphatase 2B Catalytic Subunit Alpha Isoform		Q08209	0.0182588	0.037149	1.0	By_ingredient
SMTT02706	PRDX5		peroxiredoxin 5	Peroxiredoxin-5, Mitochondrial		P30044	0.00612339	0.0208847	1.0	By_ingredient
SMTT02731	PRODH	22	Proline Dehydrogenase 1	Proline Dehydrogenase 1, Mitochondrial	ENSG00000100033	O43272	0.00612339	0.0208847	1.0	By_ingredient
SMTT02747	PRSS1	7	Serine Protease 1	Trypsin-1	ENSG00000204983	P07477	0.703711	0.730088	1.0	By_ingredient
SMTT02776	PTGS1		prostaglandin-endoperoxide synthase 1	Prostaglandin G/H Synthase 1		P23219	0.00762553	0.0234368	1.0	By_ingredient
SMTT02777	PTGS2		prostaglandin-endoperoxide synthase 2	Prostaglandin G/H Synthase 2		P35354	0.128009	0.153784	1.0	By_ingredient
SMTT02803	PYGL	14	Glycogen Phosphorylase L	Glycogen Phosphorylase, Liver Form	ENSG00000100504	P06737	0.00101639	0.00733172	1.0	By_ingredient
SMTT02824	RAF1	3	Raf-1 Proto-oncogene, Serine/threonine Kinase	RAF Proto-oncogene Serine/threonine-protein Kinase	ENSG00000132155	P04049	0.0420906	0.0639873	1.0	By_ingredient
SMTT02832	RARA	17	Retinoic Acid Receptor Alpha	Retinoic Acid Receptor Alpha	ENSG00000131759	P10276	0.0122096	0.0295348	1.0	By_ingredient
SMTT02865	RELA		RELA proto-oncogene, NF-kB subunit	Transcription Factor P65		Q04206	0.00531763	0.0194268	1.0	By_ingredient
SMTT02966	RUNX1	21	Runt Related Transcription Factor 1		ENSG00000159216		0.00612339	0.0208847	1.0	By_ingredient
SMTT02969	RXRA		retinoid X receptor alpha	Retinoic Acid Receptor RXR-alpha		P19793	0.510043	0.541993	1.0	By_ingredient
SMTT03005	SCN5A	3	Sodium Voltage-gated Channel Alpha Subunit 5	Sodium Channel Protein Type 5 Subunit Alpha	ENSG00000183873	Q14524	0.49717	0.529301	1.0	By_ingredient
SMTT03190	SLC6A1	3	Solute Carrier Family 6 Member 1	Sodium- And Chloride-dependent GABA Transporter 1	ENSG00000157103	P30531	0.00612339	0.0208847	1.0	By_ingredient
SMTT03193	SLC6A2	16	Solute Carrier Family 6 Member 2	Sodium-dependent Noradrenaline Transporter	ENSG00000103546	P23975	0.595349	0.625788	1.0	By_ingredient
SMTT03195	SLC6A3	5	Solute Carrier Family 6 Member 3	Sodium-dependent Dopamine Transporter	ENSG00000142319	Q01959	0.175054	0.201949	1.0	By_ingredient
SMTT03196	SLC6A4		solute carrier family 6 member 4	Sodium-dependent Serotonin Transporter		P31645	0.754737	0.778448	1.0	By_ingredient
SMTT03256	SOD1	21	Superoxide Dismutase 1	Superoxide Dismutase [Cu-Zn]	ENSG00000142168	P00441	0.237044	0.265623	1.0	By_ingredient
SMTT03502	TNF		tumor necrosis factor	Tumor Necrosis Factor		P01375	0.173929	0.200771	1.0	By_ingredient
SMTT03530	TP53	17	Tumor Protein P53	Cellular Tumor Antigen P53	ENSG00000141510	P04637	0.264714	0.293894	1.0	By_ingredient
SMTT03583	TRPC3	4	Transient Receptor Potential Cation Channel Subfamily C Member 3		ENSG00000138741		0.00612339	0.0208847	1.0	By_ingredient
SMTT03591	TRPV3	17	Transient Receptor Potential Cation Channel Subfamily V Member 3	Transient Receptor Potential Cation Channel Subfamily V Member 3	ENSG00000167723	Q8NET8	0.00612339	0.0208847	1.0	By_ingredient
SMTT03661	UCHL1	4	Ubiquitin C-terminal Hydrolase L1	Ubiquitin Carboxyl-terminal Hydrolase Isozyme L1	ENSG00000154277	P09936	0.00612339	0.0208847	1.0	By_ingredient
SMTT03704	VCP	9	Valosin Containing Protein	Transitional Endoplasmic Reticulum ATPase	ENSG00000165280	P55072	0.0182588	0.037149	1.0	By_ingredient
SMTT03708	VEGFA		vascular endothelial growth factor A	Vascular Endothelial Growth Factor A		P15692	0.287011	0.316779	1.0	By_ingredient
SMTT03764	XDH	2	Xanthine Dehydrogenase	Xanthine Dehydrogenase/oxidase	ENSG00000158125	P47989	0.00246961	0.0132942	1.0	By_ingredient
SMTT03871	CYP4B1	1	Cytochrome P450 Family 4 Subfamily B Member 1		ENSG00000142973	P13584	0.00612339	0.0208847	1.0	By_ingredient
SMTT03910	AMY1C	1	Amylase, Alpha 1C (salivary)		ENSG00000187733	P04745	0.0122096	0.0295348	1.0	By_ingredient
SMTT03986	SAA2	11	Serum Amyloid A2		ENSG00000134339	P02735	0.0302473	0.0511217	1.0	By_ingredient
SMTT04054	PGA5	11	Pepsinogen 5, Group I (pepsinogen A)		ENSG00000256713	P00790	0.00612339	0.0208847	1.0	By_ingredient
SMTT04237	PLB1	2	Phospholipase B1		ENSG00000163803	Q6P1J6	0.227593	0.255912	1.0	By_ingredient
SMTT04252	FRAP1		Serine/threonine-protein Kinase MTOR/mechanistic target of rapamycin kinase			P42345	0.0182588	0.037149	1.0	By_ingredient
SMTT04254	Cyp2b1		Cytochrome P450 2B1			P00176	0.000221324	0.00253579	1.0	By_ingredient
SMTT04263	MYST4		Histone Acetyltransferase MYST4/lysine acetyltransferase 6B			Q8WYB5	0.00612339	0.0208847	1.0	By_ingredient
