# Supplementary material for: A Network Pharmacology-Based Study on Irritable Bowel Syndrome Prevention and Treatment Utilizing Shenling Baizhu Powder
Source: Biomed Res Int. 2021 Nov 23;2021:4579850. doi: 10.1155/2021/4579850 (PMC8632384; doi:10.1155/2021/4579850)
Supplement: Supplementary Materials — Please find detailed data in the supplementary file, including the original data of SymMap, metabolomics, and molecular docking of Shenling Baizhu powder. “Shenling Baizhu powder SymMap” includes all herbal targets and combined targets. “Shenling Baizhu powder metabolomics” includes two-dimensional structural data analysis. “Molecular docking” involves molecule-target docking and the results. [file 4579850.f1.zip › Data in brief/2. Shenling Baizhu powder Metabolomics/2D structure/1.csv]

Target	Common name	Uniprot ID	ChEMBL ID	Target Class	Probability*	Known actives (3D/2D)
GABA transporter 1	SLC6A1	P30531	CHEMBL1903	Electrochemical transporter	1.0	5 / 1
GABA-A receptor; alpha-1/beta-2/gamma-2	GABRA1 GABRB2 GABRG2	P14867 P47870 P18507	CHEMBL2095172	Ligand-gated ion channel	1.0	1 / 1
GABA A receptor alpha-3/beta-2/gamma-2	GABRA3 GABRB2 GABRG2	P34903 P47870 P18507	CHEMBL2111339	Ligand-gated ion channel	1.0	2 / 1
GABA A receptor alpha-2/beta-2/gamma-2	GABRA2 GABRB2 GABRG2	P47869 P47870 P18507	CHEMBL2111413	Ligand-gated ion channel	1.0	2 / 1
GABA-B receptor	GABBR2 GABBR1	O75899 Q9UBS5	CHEMBL2111463	Family C G protein-coupled receptor	1.0	5 / 1
GABA receptor rho-1 subunit	GABRR1	P24046	CHEMBL3561	Ligand-gated ion channel	1.0	2 / 1
GABA transporter 3	SLC6A11	P48066	CHEMBL5208	Electrochemical transporter	1.0	1 / 1
GABA transporter 2 (by homology)	SLC6A13	Q9NSD5	CHEMBL4535	Electrochemical transporter	1.0	1 / 1
Betaine transporter	SLC6A12	P48065	CHEMBL3715	Electrochemical transporter	0.125817530785	3 / 3
Glutamate receptor ionotropic kainate 1	GRIK1	P39086	CHEMBL1918	Ligand-gated ion channel	0.033970689612	0 / 10
Glutamate receptor ionotropic, AMPA 1	GRIA1	P42261	CHEMBL2009	Ligand-gated ion channel	0.033970689612	0 / 1
Glutamate receptor ionotropic kainate 5	GRIK5	Q16478	CHEMBL2675	Ligand-gated ion channel	0.033970689612	0 / 1
Excitatory amino acid transporter 3	SLC1A1	P43005	CHEMBL2721	Electrochemical transporter	0.033970689612	0 / 3
Metabotropic glutamate receptor 4	GRM4	Q14833	CHEMBL2736	Family C G protein-coupled receptor	0.033970689612	0 / 3
Glutamate receptor ionotropic, AMPA 4	GRIA4	P48058	CHEMBL3190	Ligand-gated ion channel	0.033970689612	0 / 1
Metabotropic glutamate receptor 5	GRM5	P41594	CHEMBL3227	Family C G protein-coupled receptor	0.033970689612	0 / 4
Metabotropic glutamate receptor 8	GRM8	O00222	CHEMBL3228	Family C G protein-coupled receptor	0.033970689612	0 / 3
Glutamate receptor ionotropic kainate 2	GRIK2	Q13002	CHEMBL3683	Ligand-gated ion channel	0.033970689612	0 / 8
Glutamate receptor ionotropic kainate 3	GRIK3	Q13003	CHEMBL3684	Ligand-gated ion channel	0.033970689612	0 / 1
Metabotropic glutamate receptor 1	GRM1	Q13255	CHEMBL3772	Family C G protein-coupled receptor	0.033970689612	0 / 4
Metabotropic glutamate receptor 7	GRM7	Q14831	CHEMBL3777	Family C G protein-coupled receptor	0.033970689612	0 / 1
Glutamate receptor ionotropic, AMPA 2	GRIA2	P42262	CHEMBL4016	Ligand-gated ion channel	0.033970689612	0 / 1
Histone deacetylase 3	HDAC3	O15379	CHEMBL1829	Eraser	0.0238327432783	0 / 1
Gamma-butyrobetaine dioxygenase	BBOX1	O75936	CHEMBL2163175	Enzyme	0.0238327432783	0 / 11
Gamma-amino-N-butyrate transaminase	ABAT	P80404	CHEMBL2044	Transferase	0.0238327432783	2 / 0
Carnitine palmitoyltransferase 2	CPT2	P23786	CHEMBL3238	Enzyme	0.0	0 / 1
Lysine-specific demethylase 4D-like	KDM4E	B2RXH2	CHEMBL1293226	Eraser	0.0	0 / 3
Lysine-specific demethylase 2A	KDM2A	Q9Y2K7	CHEMBL1938210	Eraser	0.0	0 / 4
Lysine-specific demethylase 6B	KDM6B	O15054	CHEMBL1938211	Eraser	0.0	0 / 1
Histone lysine demethylase PHF8	PHF8	Q9UPP1	CHEMBL1938212	Eraser	0.0	0 / 4
Lysine-specific demethylase 5C	KDM5C	P41229	CHEMBL2163176	Eraser	0.0	0 / 3
Egl nine homolog 1	EGLN1	Q9GZT9	CHEMBL5697	Oxidoreductase	0.0	1 / 1
Metabotropic glutamate receptor 3	GRM3	Q14832	CHEMBL2888	Family C G protein-coupled receptor	0.0	2 / 11
Metabotropic glutamate receptor 2	GRM2	Q14416	CHEMBL5137	Family C G protein-coupled receptor	0.0	3 / 18
GABA-B receptor (by homology)	GABBR1	Q9UBS5	CHEMBL2064	Family C G protein-coupled receptor	0.0	1 / 0
Metabotropic glutamate receptor 6	GRM6	O15303	CHEMBL4573	Family C G protein-coupled receptor	0.0	1 / 8
Adenosine A3 receptor	ADORA3	P0DMS8	CHEMBL256	Family A G protein-coupled receptor	0.0	1 / 1
Aminopeptidase N	ANPEP	P15144	CHEMBL1907	Protease	0.0	1 / 2
Aminopeptidase A	ENPEP	Q07075	CHEMBL3439	Protease	0.0	2 / 10
Plasminogen	PLG	P00747	CHEMBL1801	Protease	0.0	0 / 1
Leukotriene A4 hydrolase	LTA4H	P09960	CHEMBL4618	Protease	0.0	0 / 1
Excitatory amino acid transporter 2	SLC1A2	P43004	CHEMBL4973	Electrochemical transporter	0.0	0 / 3
Voltage-gated calcium channel alpha2/delta subunit 1	CACNA2D1	P54289	CHEMBL1919	Calcium channel auxiliary subunit alpha2delta family	0.0	1 / 4
Leucine aminopeptidase	LAP3	P28838	CHEMBL3965	Protease	0.0	0 / 1
Matrix metalloproteinase 2	MMP2	P08253	CHEMBL333	Protease	0.0	1 / 0
Testis-specific androgen-binding protein	SHBG	P04278	CHEMBL3305	Secreted protein	0.0	0 / 1
Carbonic anhydrase II	CA2	P00918	CHEMBL205	Lyase	0.0	2 / 0
Carbonic anhydrase I	CA1	P00915	CHEMBL261	Lyase	0.0	2 / 0
Carbonic anhydrase XII	CA12	O43570	CHEMBL3242	Lyase	0.0	2 / 0
Carbonic anhydrase IX	CA9	Q16790	CHEMBL3594	Lyase	0.0	2 / 0
Lysine-specific demethylase 7A/7B	KDM7A	Q6ZMT4	CHEMBL2163177	Eraser	0.0	0 / 1
Androgen Receptor	AR	P10275	CHEMBL1871	Nuclear receptor	0.0	0 / 1
CDC45-related protein	CDC45	O75419	CHEMBL3040	Other nuclear protein	0.0	0 / 1
Leukocyte common antigen	PTPRC	P08575	CHEMBL3243	Enzyme	0.0	0 / 1
Dual specificity phosphatase Cdc25A	CDC25A	P30304	CHEMBL3775	Phosphatase	0.0	0 / 1
Solute carrier family 22 member 6 (by homology)	SLC22A6	Q4U2R8	CHEMBL1641347	Electrochemical transporter	0.0	0 / 2
Carboxypeptidase B2 isoform A	CPB2	Q96IY4	CHEMBL3419	Protease	0.0	0 / 1
Xaa-Pro dipeptidase	PEPD	P12955	CHEMBL4185	Protease	0.0	0 / 1
11-beta-hydroxysteroid dehydrogenase 1	HSD11B1	P28845	CHEMBL4235	Enzyme	0.0	0 / 2
Fatty acid binding protein adipocyte	FABP4	P15090	CHEMBL2083	Fatty acid binding protein family	0.0	0 / 1
Peroxisome proliferator-activated receptor alpha	PPARA	Q07869	CHEMBL239	Nuclear receptor	0.0	0 / 3
Fatty acid binding protein muscle	FABP3	P05413	CHEMBL3344	Fatty acid binding protein family	0.0	0 / 1
Fatty acid binding protein epidermal	FABP5	Q01469	CHEMBL3674	Fatty acid binding protein family	0.0	0 / 1
Peroxisome proliferator-activated receptor delta	PPARD	Q03181	CHEMBL3979	Nuclear receptor	0.0	0 / 2
Free fatty acid receptor 1	FFAR1	O14842	CHEMBL4422	Family A G protein-coupled receptor	0.0	0 / 1
Fatty acid binding protein intestinal	FABP2	P12104	CHEMBL4879	Fatty acid binding protein family	0.0	0 / 1
HMG-CoA reductase	HMGCR	P04035	CHEMBL402	Oxidoreductase	0.0	0 / 1
Aminopeptidase B	RNPEP	Q9H4A4	CHEMBL2432	Protease	0.0	0 / 1
Carboxypeptidase A1	CPA1	P15085	CHEMBL2088	Protease	0.0	0 / 1
Ornithine decarboxylase	ODC1	P11926	CHEMBL1869	Lyase	0.0	1 / 1
