# Supplementary material for: A Network Pharmacology-Based Study on Irritable Bowel Syndrome Prevention and Treatment Utilizing Shenling Baizhu Powder
Source: Biomed Res Int. 2021 Nov 23;2021:4579850. doi: 10.1155/2021/4579850 (PMC8632384; doi:10.1155/2021/4579850)
Supplement: Supplementary Materials — Please find detailed data in the supplementary file, including the original data of SymMap, metabolomics, and molecular docking of Shenling Baizhu powder. “Shenling Baizhu powder SymMap” includes all herbal targets and combined targets. “Shenling Baizhu powder metabolomics” includes two-dimensional structural data analysis. “Molecular docking” involves molecule-target docking and the results. [file 4579850.f1.zip › Data in brief/2. Shenling Baizhu powder Metabolomics/2D structure/2.csv]

Target	Common name	Uniprot ID	ChEMBL ID	Target Class	Probability*	Known actives (3D/2D)
Histone deacetylase 3	HDAC3	O15379	CHEMBL1829	Eraser	0.105843861316	0 / 1
Carbonic anhydrase I	CA1	P00915	CHEMBL261	Lyase	0.0443083186041	10 / 0
Carbonic anhydrase IX	CA9	Q16790	CHEMBL3594	Lyase	0.0443083186041	6 / 0
Egl nine homolog 1	EGLN1	Q9GZT9	CHEMBL5697	Oxidoreductase	0.033970689612	0 / 2
GABA transporter 1	SLC6A1	P30531	CHEMBL1903	Electrochemical transporter	0.0	0 / 1
GABA-A receptor; alpha-1/beta-2/gamma-2	GABRA1 GABRB2 GABRG2	P14867 P47870 P18507	CHEMBL2095172	Ligand-gated ion channel	0.0	0 / 1
GABA A receptor alpha-3/beta-2/gamma-2	GABRA3 GABRB2 GABRG2	P34903 P47870 P18507	CHEMBL2111339	Ligand-gated ion channel	0.0	0 / 1
GABA A receptor alpha-2/beta-2/gamma-2	GABRA2 GABRB2 GABRG2	P47869 P47870 P18507	CHEMBL2111413	Ligand-gated ion channel	0.0	0 / 2
GABA-B receptor	GABBR2 GABBR1	O75899 Q9UBS5	CHEMBL2111463	Family C G protein-coupled receptor	0.0	0 / 1
GABA receptor rho-1 subunit	GABRR1	P24046	CHEMBL3561	Ligand-gated ion channel	0.0	0 / 1
GABA transporter 3	SLC6A11	P48066	CHEMBL5208	Electrochemical transporter	0.0	0 / 1
Solute carrier family 22 member 6 (by homology)	SLC22A6	Q4U2R8	CHEMBL1641347	Electrochemical transporter	0.0	0 / 2
GABA transporter 2 (by homology)	SLC6A13	Q9NSD5	CHEMBL4535	Electrochemical transporter	0.0	0 / 1
Estrogen receptor beta	ESR2	Q92731	CHEMBL242	Nuclear receptor	0.0	1 / 0
Toll-like receptor 4 (by homology)	TLR4	O00206	CHEMBL5255	Toll-like and Il-1 receptors	0.0	1 / 0
Fatty acid binding protein adipocyte	FABP4	P15090	CHEMBL2083	Fatty acid binding protein family	0.0	0 / 1
Peroxisome proliferator-activated receptor alpha	PPARA	Q07869	CHEMBL239	Nuclear receptor	0.0	0 / 3
Fatty acid binding protein muscle	FABP3	P05413	CHEMBL3344	Fatty acid binding protein family	0.0	0 / 1
Fatty acid binding protein epidermal	FABP5	Q01469	CHEMBL3674	Fatty acid binding protein family	0.0	0 / 1
Peroxisome proliferator-activated receptor delta	PPARD	Q03181	CHEMBL3979	Nuclear receptor	0.0	0 / 2
Free fatty acid receptor 1	FFAR1	O14842	CHEMBL4422	Family A G protein-coupled receptor	0.0	0 / 1
Fatty acid binding protein intestinal	FABP2	P12104	CHEMBL4879	Fatty acid binding protein family	0.0	0 / 1
ATP-citrate synthase	ACLY	P53396	CHEMBL3720	Enzyme	0.0	0 / 1
11-beta-hydroxysteroid dehydrogenase 1	HSD11B1	P28845	CHEMBL4235	Enzyme	0.0	0 / 3
Neuronal acetylcholine receptor protein alpha-7 subunit (by homology)	CHRNA7	P36544	CHEMBL2492	Ligand-gated ion channel	0.0	0 / 2
Beta-glucocerebrosidase	GBA	P04062	CHEMBL2179	Enzyme	0.0	3 / 0
Androgen Receptor	AR	P10275	CHEMBL1871	Nuclear receptor	0.0	0 / 4
Vitamin D receptor	VDR	P11473	CHEMBL1977	Nuclear receptor	0.0	0 / 1
Cytochrome P450 19A1	CYP19A1	P11511	CHEMBL1978	Cytochrome P450	0.0	0 / 3
Bile acid receptor FXR	NR1H4	Q96RI1	CHEMBL2047	Nuclear receptor	0.0	0 / 7
Dual specificity phosphatase Cdc25A	CDC25A	P30304	CHEMBL3775	Phosphatase	0.0	0 / 2
Glucose-6-phosphate 1-dehydrogenase	G6PD	P11413	CHEMBL5347	Enzyme	0.0	0 / 5
G-protein coupled bile acid receptor 1	GPBAR1	Q8TDU6	CHEMBL5409	Family A G protein-coupled receptor	0.0	0 / 13
Aldo-keto reductase family 1 member B10	AKR1B10	O60218	CHEMBL5983	Enzyme	0.0	0 / 1
DNA polymerase beta (by homology)	POLB	P06746	CHEMBL2392	Enzyme	0.0	0 / 1
11-beta-hydroxysteroid dehydrogenase 2	HSD11B2	P80365	CHEMBL3746	Enzyme	0.0	0 / 1
Hydroxyacid oxidase 1	HAO1	Q9UJM8	CHEMBL4229	Enzyme	0.0	0 / 1
Matrix metalloproteinase 2	MMP2	P08253	CHEMBL333	Protease	0.0	3 / 0
Matrix metalloproteinase 8	MMP8	P22894	CHEMBL4588	Protease	0.0	1 / 0
Hydroxycarboxylic acid receptor 2	HCAR2	Q8TDS4	CHEMBL3785	Family A G protein-coupled receptor	0.0	1 / 0
D-amino-acid oxidase	DAO	P14920	CHEMBL5485	Enzyme	0.0	1 / 0
Carbonic anhydrase II	CA2	P00918	CHEMBL205	Lyase	0.0	8 / 0
Carbonic anhydrase VI	CA6	P23280	CHEMBL3025	Lyase	0.0	3 / 0
Carbonic anhydrase XII	CA12	O43570	CHEMBL3242	Lyase	0.0	7 / 0
Carbonic anhydrase VII	CA7	P43166	CHEMBL2326	Lyase	0.0	2 / 0
Carbonic anhydrase III	CA3	P07451	CHEMBL2885	Lyase	0.0	1 / 0
Carbonic anhydrase XIV	CA14	Q9ULX7	CHEMBL3510	Lyase	0.0	2 / 0
Carbonic anhydrase IV	CA4	P22748	CHEMBL3729	Lyase	0.0	2 / 0
Carbonic anhydrase VB	CA5B	Q9Y2D0	CHEMBL3969	Lyase	0.0	1 / 0
Carbonic anhydrase VA	CA5A	P35218	CHEMBL4789	Lyase	0.0	1 / 0
Carbonic anhydrase XIII (by homology)	CA13	Q8N1Q1	CHEMBL3912	Lyase	0.0	1 / 0
Lysine-specific demethylase 4D-like	KDM4E	B2RXH2	CHEMBL1293226	Eraser	0.0	1 / 0
Lysine-specific demethylase 6B	KDM6B	O15054	CHEMBL1938211	Eraser	0.0	1 / 0
Aldose reductase	AKR1B1	P15121	CHEMBL1900	Enzyme	0.0	1 / 1
Aminopeptidase B	RNPEP	Q9H4A4	CHEMBL2432	Protease	0.0	0 / 1
UDP-glucuronosyltransferase 2B7	UGT2B7	P16662	CHEMBL4370	Enzyme	0.0	0 / 4
Matrix metalloproteinase 9	MMP9	P14780	CHEMBL321	Protease	0.0	2 / 0
Alpha-L-fucosidase I	FUCA1	P04066	CHEMBL4176	Enzyme	0.0	1 / 0
Squalene synthetase (by homology)	FDFT1	P37268	CHEMBL3338	Enzyme	0.0	0 / 1
Prostanoid EP2 receptor	PTGER2	P43116	CHEMBL1881	Family A G protein-coupled receptor	0.0	0 / 1
Prostanoid FP receptor	PTGFR	P43088	CHEMBL1987	Family A G protein-coupled receptor	0.0	0 / 1
Protein farnesyltransferase	FNTA FNTB	P49354 P49356	CHEMBL2094108	Enzyme	0.0	0 / 2
Histone deacetylase 6	HDAC6	Q9UBN7	CHEMBL1865	Eraser	0.0	1 / 0
Histone deacetylase 8	HDAC8	Q9BY41	CHEMBL3192	Eraser	0.0	1 / 0
Corticosteroid binding globulin	SERPINA6	P08185	CHEMBL2421	Secreted protein	0.0	0 / 3
Testis-specific androgen-binding protein	SHBG	P04278	CHEMBL3305	Secreted protein	0.0	0 / 9
Estradiol 17-beta-dehydrogenase 3	HSD17B3	P37058	CHEMBL4234	Enzyme	0.0	0 / 10
GABA-B receptor (by homology)	GABBR1	Q9UBS5	CHEMBL2064	Family C G protein-coupled receptor	0.0	0 / 1
Niemann-Pick C1-like protein 1	NPC1L1	Q9UHC9	CHEMBL2027	Other membrane protein	0.0	0 / 2
Betaine transporter	SLC6A12	P48065	CHEMBL3715	Electrochemical transporter	0.0	0 / 2
Carnitine O-palmitoyltransferase 1, liver isoform (by homology)	CPT1A	P50416	CHEMBL1293194	Enzyme	0.0	0 / 2
HMG-CoA reductase	HMGCR	P04035	CHEMBL402	Oxidoreductase	0.0	1 / 1
Lysine-specific demethylase 2A	KDM2A	Q9Y2K7	CHEMBL1938210	Eraser	0.0	1 / 1
Histone lysine demethylase PHF8	PHF8	Q9UPP1	CHEMBL1938212	Eraser	0.0	1 / 1
Lysine-specific demethylase 5C	KDM5C	P41229	CHEMBL2163176	Eraser	0.0	1 / 1
Glutamate carboxypeptidase II	FOLH1	Q04609	CHEMBL1892	Protease	0.0	2 / 1
