# Supplementary material for: A Network Pharmacology-Based Study on Irritable Bowel Syndrome Prevention and Treatment Utilizing Shenling Baizhu Powder
Source: Biomed Res Int. 2021 Nov 23;2021:4579850. doi: 10.1155/2021/4579850 (PMC8632384; doi:10.1155/2021/4579850)
Supplement: Supplementary Materials — Please find detailed data in the supplementary file, including the original data of SymMap, metabolomics, and molecular docking of Shenling Baizhu powder. “Shenling Baizhu powder SymMap” includes all herbal targets and combined targets. “Shenling Baizhu powder metabolomics” includes two-dimensional structural data analysis. “Molecular docking” involves molecule-target docking and the results. [file 4579850.f1.zip › Data in brief/2. Shenling Baizhu powder Metabolomics/2D structure/4.csv]

Target	Common name	Uniprot ID	ChEMBL ID	Target Class	Probability*	Known actives (3D/2D)
Carbonic anhydrase VI	CA6	P23280	CHEMBL3025	Lyase	0.248387034018	0 / 2
Carbonic anhydrase IV	CA4	P22748	CHEMBL3729	Lyase	0.248387034018	0 / 2
Kinesin-like protein 1	KIF11	P52732	CHEMBL4581	Other cytosolic protein	0.248387034018	0 / 20
Serotonin 3a (5-HT3a) receptor	HTR3A	P46098	CHEMBL1899	Ligand-gated ion channel	0.0544879468076	0 / 1
C-C chemokine receptor type 1	CCR1	P32246	CHEMBL2413	Family A G protein-coupled receptor	0.0443083186041	0 / 9
C-C chemokine receptor type 5	CCR5	P51681	CHEMBL274	Family A G protein-coupled receptor	0.0443083186041	0 / 6
C-C chemokine receptor type 8	CCR8	P51685	CHEMBL4596	Family A G protein-coupled receptor	0.0443083186041	0 / 8
Nitric-oxide synthase, brain	NOS1	P29475	CHEMBL3568	Enzyme	0.033970689612	0 / 2
Nitric oxide synthase, inducible	NOS2	P35228	CHEMBL4481	Enzyme	0.033970689612	0 / 3
Nitric-oxide synthase, endothelial	NOS3	P29474	CHEMBL4803	Enzyme	0.033970689612	0 / 2
Monoamine oxidase B	MAOB	P27338	CHEMBL2039	Oxidoreductase	0.033970689612	0 / 10
Quinone reductase 2	NQO2	P16083	CHEMBL3959	Enzyme	0.033970689612	0 / 3
Indoleamine 2,3-dioxygenase	IDO1	P14902	CHEMBL4685	Enzyme	0.033970689612	0 / 2
Cytochrome P450 2A6	CYP2A6	P11509	CHEMBL5282	Cytochrome P450	0.033970689612	0 / 6
Bcl-2-related protein A1 (by homology)	BCL2A1	Q16548	CHEMBL6044	Unclassified protein	0.0238327432783	0 / 1
Serotonin 2a (5-HT2a) receptor	HTR2A	P28223	CHEMBL224	Family A G protein-coupled receptor	0.0238327432783	0 / 17
Serotonin 2c (5-HT2c) receptor	HTR2C	P28335	CHEMBL225	Family A G protein-coupled receptor	0.0238327432783	0 / 19
Troponin, cardiac muscle	TNNC1 TNNT2 TNNI3	P63316 P45379 P19429	CHEMBL2095202	Unclassified protein	0.0	0 / 1
Methionine aminopeptidase 2	METAP2	P50579	CHEMBL3922	Protease	0.0	0 / 2
Tyrosine-protein kinase SRC	SRC	P12931	CHEMBL267	Kinase	0.0	0 / 4
Butyrylcholinesterase	BCHE	P06276	CHEMBL1914	Hydrolase	0.0	0 / 35
Inosine-5'-monophosphate dehydrogenase 2	IMPDH2	P12268	CHEMBL2002	Oxidoreductase	0.0	0 / 4
Acetylcholinesterase	ACHE	P22303	CHEMBL220	Hydrolase	0.0	0 / 35
Carbonic anhydrase VII	CA7	P43166	CHEMBL2326	Lyase	0.0	0 / 1
Beta amyloid A4 protein	APP	P05067	CHEMBL2487	Membrane receptor	0.0	0 / 1
Carbonic anhydrase I	CA1	P00915	CHEMBL261	Lyase	0.0	0 / 1
Carbonic anhydrase III	CA3	P07451	CHEMBL2885	Lyase	0.0	0 / 1
Poly [ADP-ribose] polymerase-1	PARP1	P09874	CHEMBL3105	Enzyme	0.0	0 / 19
Carbonic anhydrase XII	CA12	O43570	CHEMBL3242	Lyase	0.0	0 / 1
Cytochrome P450 1A2	CYP1A2	P05177	CHEMBL3356	Cytochrome P450	0.0	0 / 1
Carbonic anhydrase XIV	CA14	Q9ULX7	CHEMBL3510	Lyase	0.0	0 / 1
Carbonic anhydrase IX	CA9	Q16790	CHEMBL3594	Lyase	0.0	0 / 1
Carbonic anhydrase XIII	CA13	Q8N1Q1	CHEMBL3912	Lyase	0.0	0 / 1
Carbonic anhydrase VB	CA5B	Q9Y2D0	CHEMBL3969	Lyase	0.0	0 / 1
Carbonic anhydrase VA	CA5A	P35218	CHEMBL4789	Lyase	0.0	0 / 1
Tankyrase-2	TNKS2	Q9H2K2	CHEMBL6154	Enzyme	0.0	0 / 1
Tankyrase-1	TNKS	O95271	CHEMBL6164	Enzyme	0.0	0 / 1
GABA-A receptor; alpha-3/beta-3/gamma-2	GABRB3 GABRA3 GABRG2	P28472 P34903 P18507	CHEMBL2094120	Ligand-gated ion channel	0.0	0 / 8
GABA-A receptor; alpha-1/beta-3/gamma-2	GABRB3 GABRG2 GABRA1	P28472 P18507 P14867	CHEMBL2094121	Ligand-gated ion channel	0.0	0 / 8
GABA-A receptor; alpha-5/beta-3/gamma-2	GABRB3 GABRG2 GABRA5	P28472 P18507 P31644	CHEMBL2094122	Ligand-gated ion channel	0.0	0 / 8
GABA-A receptor; alpha-2/beta-3/gamma-2	GABRA2 GABRB3 GABRG2	P47869 P28472 P18507	CHEMBL2094130	Ligand-gated ion channel	0.0	0 / 8
Serotonin 2b (5-HT2b) receptor	HTR2B	P41595	CHEMBL1833	Family A G protein-coupled receptor	0.0	0 / 4
Telomerase reverse transcriptase	TERT	O14746	CHEMBL2916	Enzyme	0.0	0 / 4
Serine/threonine-protein kinase PIM3	PIM3	Q86V86	CHEMBL5407	Kinase	0.0	0 / 1
Cytochrome P450 19A1	CYP19A1	P11511	CHEMBL1978	Cytochrome P450	0.0	0 / 1
Beta-secretase 1	BACE1	P56817	CHEMBL4822	Protease	0.0	0 / 2
Cyclin-dependent kinase 4/cyclin D1	CCND1 CDK4	P24385 P11802	CHEMBL1907601	Kinase	0.0	0 / 12
Proteasome Macropain subunit MB1	PSMB5	P28074	CHEMBL4662	Protease	0.0	0 / 1
Tryptophan 2,3-dioxygenase (by homology)	TDO2	P48775	CHEMBL2140	Enzyme	0.0	0 / 1
Poly [ADP-ribose] polymerase 2 (by homology)	PARP2	Q9UGN5	CHEMBL5366	Enzyme	0.0	0 / 1
DNA topoisomerase II alpha	TOP2A	P11388	CHEMBL1806	Isomerase	0.0	0 / 2
Cyclin-dependent kinase 5/CDK5 activator 1	CDK5R1 CDK5	Q15078 Q00535	CHEMBL1907600	Kinase	0.0	0 / 2
Cyclin-dependent kinase 2/cyclin E	CCNE2 CDK2 CCNE1	O96020 P24941 P24864	CHEMBL2094126	Other cytosolic protein	0.0	0 / 4
Cyclin-dependent kinase 1/cyclin B	CCNB3 CDK1 CCNB1 CCNB2	Q8WWL7 P06493 P14635 O95067	CHEMBL2094127	Other cytosolic protein	0.0	0 / 2
Glycogen synthase kinase-3 beta	GSK3B	P49841	CHEMBL262	Kinase	0.0	0 / 1
Mitogen-activated protein kinase kinase kinase 11	MAP3K11	Q16584	CHEMBL2708	Kinase	0.0	0 / 1
Mitogen-activated protein kinase kinase kinase 9	MAP3K9	P80192	CHEMBL2872	Kinase	0.0	0 / 1
Protein kinase C beta	PRKCB	P05771	CHEMBL3045	Kinase	0.0	0 / 1
Rho-associated protein kinase 1	ROCK1	Q13464	CHEMBL3231	Kinase	0.0	0 / 1
Androgen Receptor	AR	P10275	CHEMBL1871	Nuclear receptor	0.0	0 / 4
Serotonin 6 (5-HT6) receptor	HTR6	P50406	CHEMBL3371	Family A G protein-coupled receptor	0.0	0 / 1
Inhibitor of NF-kappa-B kinase (IKK)	CHUK	O15111	CHEMBL3476	Kinase	0.0	0 / 8
Aldose reductase (by homology)	AKR1B1	P15121	CHEMBL1900	Enzyme	0.0	0 / 1
Epidermal growth factor receptor erbB1	EGFR	P00533	CHEMBL203	Kinase	0.0	0 / 4
Monoamine oxidase A	MAOA	P21397	CHEMBL1951	Oxidoreductase	0.0	0 / 9
Fatty acid binding protein adipocyte	FABP4	P15090	CHEMBL2083	Fatty acid binding protein family	0.0	0 / 3
Fatty acid binding protein muscle	FABP3	P05413	CHEMBL3344	Fatty acid binding protein family	0.0	0 / 1
Baculoviral IAP repeat-containing protein 5	BIRC5	O15392	CHEMBL5989	Unclassified protein	0.0	0 / 1
Bromodomain-containing protein 9	BRD9	Q9H8M2	CHEMBL3108640	Reader	0.0	0 / 1
Dual specificty protein kinase CLK1	CLK1	P49759	CHEMBL4224	Kinase	0.0	0 / 1
Ras-related C3 botulinum toxin substrate 1	RAC1	P63000	CHEMBL6094	Unclassified protein	0.0	0 / 1
Dual-specificity tyrosine-phosphorylation regulated kinase 1A (by homology)	DYRK1A	Q13627	CHEMBL2292	Kinase	0.0	0 / 1
Fatty acid binding protein epidermal	FABP5	Q01469	CHEMBL3674	Fatty acid binding protein family	0.0	0 / 2
Serine/threonine-protein kinase Chk1	CHEK1	O14757	CHEMBL4630	Kinase	0.0	0 / 4
Hypoxanthine-guanine phosphoribosyltransferase	HPRT1	P00492	CHEMBL2360	Enzyme	0.0	0 / 1
Histone deacetylase 6	HDAC6	Q9UBN7	CHEMBL1865	Eraser	0.0	0 / 4
Flap endonuclease 1	FEN1	P39748	CHEMBL5027	Enzyme	0.0	0 / 1
Glutamate NMDA receptor; GRIN1/GRIN2B	GRIN1 GRIN2B	Q05586 Q13224	CHEMBL1907603	Ligand-gated ion channel	0.0	0 / 6
Glutamate NMDA receptor; GRIN1/GRIN2A	GRIN2A GRIN1	Q12879 Q05586	CHEMBL1907604	Ligand-gated ion channel	0.0	0 / 8
Norepinephrine transporter	SLC6A2	P23975	CHEMBL222	Electrochemical transporter	0.0	0 / 1
Serotonin transporter	SLC6A4	P31645	CHEMBL228	Electrochemical transporter	0.0	0 / 4
Dopamine transporter	SLC6A3	Q01959	CHEMBL238	Electrochemical transporter	0.0	0 / 4
Histone deacetylase 1	HDAC1	Q13547	CHEMBL325	Eraser	0.0	0 / 2
Serotonin 1a (5-HT1a) receptor	HTR1A	P08908	CHEMBL214	Family A G protein-coupled receptor	0.0	0 / 1
Alpha-1d adrenergic receptor	ADRA1D	P25100	CHEMBL223	Family A G protein-coupled receptor	0.0	0 / 1
Alpha-1a adrenergic receptor	ADRA1A	P35348	CHEMBL229	Family A G protein-coupled receptor	0.0	0 / 1
Alpha-1b adrenergic receptor	ADRA1B	P35368	CHEMBL232	Family A G protein-coupled receptor	0.0	0 / 1
Mannose-6-phosphate isomerase	MPI	P34949	CHEMBL2758	Isomerase	0.0	0 / 2
NAD-dependent deacetylase sirtuin 1	SIRT1	Q96EB6	CHEMBL4506	Eraser	0.0	0 / 1
Dopamine D2 receptor	DRD2	P14416	CHEMBL217	Family A G protein-coupled receptor	0.0	0 / 1
Scavenger receptor class B member 1	SCARB1	Q8WTV0	CHEMBL1914272	Unclassified protein	0.0	0 / 1
Sigma opioid receptor	SIGMAR1	Q99720	CHEMBL287	Membrane receptor	0.0	0 / 3
Serine/threonine-protein kinase/endoribonuclease IRE1	ERN1	O75460	CHEMBL1163101	Enzyme	0.0	0 / 1
Receptor protein-tyrosine kinase erbB-2	ERBB2	P04626	CHEMBL1824	Kinase	0.0	0 / 1
Tyrosine-protein kinase FYN	FYN	P06241	CHEMBL1841	Kinase	0.0	0 / 1
Adenosine A3 receptor	ADORA3	P0DMS8	CHEMBL256	Family A G protein-coupled receptor	0.0	0 / 1
Tyrosine-protein kinase LCK	LCK	P06239	CHEMBL258	Kinase	0.0	0 / 1
MAP kinase p38 alpha	MAPK14	Q16539	CHEMBL260	Kinase	0.0	0 / 3
MAP kinase ERK1	MAPK3	P27361	CHEMBL3385	Kinase	0.0	0 / 1
MAP kinase ERK2	MAPK1	P28482	CHEMBL4040	Kinase	0.0	0 / 1
