# Supplementary material for: A Network Pharmacology-Based Study on Irritable Bowel Syndrome Prevention and Treatment Utilizing Shenling Baizhu Powder
Source: Biomed Res Int. 2021 Nov 23;2021:4579850. doi: 10.1155/2021/4579850 (PMC8632384; doi:10.1155/2021/4579850)
Supplement: Supplementary Materials — Please find detailed data in the supplementary file, including the original data of SymMap, metabolomics, and molecular docking of Shenling Baizhu powder. “Shenling Baizhu powder SymMap” includes all herbal targets and combined targets. “Shenling Baizhu powder metabolomics” includes two-dimensional structural data analysis. “Molecular docking” involves molecule-target docking and the results. [file 4579850.f1.zip › Data in brief/2. Shenling Baizhu powder Metabolomics/2D structure/7.csv]

Target	Common name	Uniprot ID	ChEMBL ID	Target Class	Probability*	Known actives (3D/2D)
Indolethylamine N-methyltransferase	INMT	O95050	CHEMBL2131	Enzyme	0.0238327432783	10 / 0
Thrombin	F2	P00734	CHEMBL204	Protease	0.0	0 / 2
Thrombin and coagulation factor X	F10	P00742	CHEMBL244	Protease	0.0	0 / 1
Trypsin I	PRSS1	P07477	CHEMBL209	Protease	0.0	0 / 3
Urokinase-type plasminogen activator	PLAU	P00749	CHEMBL3286	Protease	0.0	0 / 4
Serotonin 2a (5-HT2a) receptor (by homology)	HTR2A	P28223	CHEMBL224	Family A G protein-coupled receptor	0.0	3 / 0
Serotonin 2c (5-HT2c) receptor	HTR2C	P28335	CHEMBL225	Family A G protein-coupled receptor	0.0	1 / 0
Serotonin 7 (5-HT7) receptor	HTR7	P34969	CHEMBL3155	Family A G protein-coupled receptor	0.0	1 / 0
Serotonin 6 (5-HT6) receptor	HTR6	P50406	CHEMBL3371	Family A G protein-coupled receptor	0.0	1 / 0
Serotonin 5a (5-HT5a) receptor	HTR5A	P47898	CHEMBL3426	Family A G protein-coupled receptor	0.0	1 / 0
Nischarin	NISCH	Q9Y2I1	CHEMBL3923	Other cytosolic protein	0.0	7 / 0
Serotonin 1d (5-HT1d) receptor	HTR1D	P28221	CHEMBL1983	Family A G protein-coupled receptor	0.0	2 / 0
Trace amine-associated receptor 1	TAAR1	Q96RJ0	CHEMBL5857	Family A G protein-coupled receptor	0.0	3 / 0
Carbonic anhydrase II	CA2	P00918	CHEMBL205	Lyase	0.0	0 / 7
Carbonic anhydrase XII	CA12	O43570	CHEMBL3242	Lyase	0.0	0 / 5
Monoamine oxidase A	MAOA	P21397	CHEMBL1951	Oxidoreductase	0.0	1 / 0
Serotonin 1b (5-HT1b) receptor	HTR1B	P28222	CHEMBL1898	Family A G protein-coupled receptor	0.0	1 / 0
Neuronal acetylcholine receptor; alpha3/beta4	CHRNA3 CHRNB4	P32297 P30926	CHEMBL1907594	Ligand-gated ion channel	0.0	1 / 0
Dihydroorotate dehydrogenase	DHODH	Q02127	CHEMBL1966	Oxidoreductase	0.0	0 / 1
Toll-like receptor 8	TLR8	Q9NR97	CHEMBL5805	Toll-like and Il-1 receptors	0.0	1 / 0
Plasminogen	PLG	P00747	CHEMBL1801	Protease	0.0	0 / 1
Kallikrein 1	KLK1	P06870	CHEMBL2319	Protease	0.0	0 / 1
Nitric-oxide synthase, brain	NOS1	P29475	CHEMBL3568	Enzyme	0.0	1 / 0
Adrenergic receptor alpha-2	ADRA2C	P18825	CHEMBL1916	Family A G protein-coupled receptor	0.0	1 / 0
Carbonic anhydrase I	CA1	P00915	CHEMBL261	Lyase	0.0	0 / 1
Carbonic anhydrase IX	CA9	Q16790	CHEMBL3594	Lyase	0.0	0 / 2
Indoleamine 2,3-dioxygenase	IDO1	P14902	CHEMBL4685	Enzyme	0.0	0 / 1
Acetylcholinesterase	ACHE	P22303	CHEMBL220	Hydrolase	0.0	3 / 4
