# Supplementary material for: A Network Pharmacology-Based Study on Irritable Bowel Syndrome Prevention and Treatment Utilizing Shenling Baizhu Powder
Source: Biomed Res Int. 2021 Nov 23;2021:4579850. doi: 10.1155/2021/4579850 (PMC8632384; doi:10.1155/2021/4579850)
Supplement: Supplementary Materials — Please find detailed data in the supplementary file, including the original data of SymMap, metabolomics, and molecular docking of Shenling Baizhu powder. “Shenling Baizhu powder SymMap” includes all herbal targets and combined targets. “Shenling Baizhu powder metabolomics” includes two-dimensional structural data analysis. “Molecular docking” involves molecule-target docking and the results. [file 4579850.f1.zip › Data in brief/2. Shenling Baizhu powder Metabolomics/2D structure/11.csv]

Target	Common name	Uniprot ID	ChEMBL ID	Target Class	Probability*	Known actives (3D/2D)
Hydroxycarboxylic acid receptor 2	HCAR2	Q8TDS4	CHEMBL3785	Family A G protein-coupled receptor	0.0743164735672	0 / 1
D-aspartate oxidase	DDO	Q99489	CHEMBL5887	Oxidoreductase	0.0443083186041	0 / 1
Matrix metalloproteinase 9	MMP9	P14780	CHEMBL321	Protease	0.0238327432783	2 / 0
Matrix metalloproteinase 2	MMP2	P08253	CHEMBL333	Protease	0.0238327432783	10 / 0
NAD-dependent deacetylase sirtuin 3	SIRT3	Q9NTG7	CHEMBL4461	Eraser	0.0	0 / 1
NAD-dependent deacetylase sirtuin 2	SIRT2	Q8IXJ6	CHEMBL4462	Eraser	0.0	0 / 1
Carbonic anhydrase II	CA2	P00918	CHEMBL205	Lyase	0.0	8 / 0
Carbonic anhydrase I	CA1	P00915	CHEMBL261	Lyase	0.0	8 / 0
Matrix metalloproteinase 3	MMP3	P08254	CHEMBL283	Protease	0.0	2 / 0
Carbonic anhydrase XII	CA12	O43570	CHEMBL3242	Lyase	0.0	8 / 0
Matrix metalloproteinase 1	MMP1	P03956	CHEMBL332	Protease	0.0	2 / 0
Carbonic anhydrase IX	CA9	Q16790	CHEMBL3594	Lyase	0.0	8 / 0
Inosine-5'-monophosphate dehydrogenase 2	IMPDH2	P12268	CHEMBL2002	Oxidoreductase	0.0	0 / 1
Protein-tyrosine phosphatase 1B	PTPN1	P18031	CHEMBL335	Phosphatase	0.0	0 / 1
Muscarinic acetylcholine receptor M1	CHRM1	P11229	CHEMBL216	Family A G protein-coupled receptor	0.0	0 / 8
Prolyl 4-hydroxylase subunit alpha-1	P4HA1	P13674	CHEMBL1250350	Enzyme	0.0	0 / 3
Hypoxia-inducible factor prolyl 4-hydroxylase	P4HTM	Q9NXG6	CHEMBL3047	Enzyme	0.0	0 / 2
Matrix metalloproteinase 8	MMP8	P22894	CHEMBL4588	Protease	0.0	1 / 0
Serine/threonine-protein kinase PLK1	PLK1	P53350	CHEMBL3024	Kinase	0.0	0 / 4
Solute carrier family 22 member 12	SLC22A12	Q96S37	CHEMBL6120	Electrochemical transporter	0.0	0 / 3
Fatty acid binding protein adipocyte	FABP4	P15090	CHEMBL2083	Fatty acid binding protein family	0.0	0 / 1
Cytochrome P450 2A6	CYP2A6	P11509	CHEMBL5282	Cytochrome P450	0.0	0 / 2
Cannabinoid receptor 1 (by homology)	CNR1	P21554	CHEMBL218	Family A G protein-coupled receptor	0.0	0 / 7
Cannabinoid receptor 2	CNR2	P34972	CHEMBL253	Family A G protein-coupled receptor	0.0	0 / 15
Lysine-specific demethylase 4D-like	KDM4E	B2RXH2	CHEMBL1293226	Eraser	0.0	0 / 1
Lysine-specific demethylase 4A	KDM4A	O75164	CHEMBL5896	Eraser	0.0	0 / 1
Lysine-specific demethylase 4D	KDM4D	Q6B0I6	CHEMBL6138	Eraser	0.0	0 / 1
Lysine-specific demethylase 4C	KDM4C	Q9H3R0	CHEMBL6175	Eraser	0.0	0 / 1
Poly [ADP-ribose] polymerase-1	PARP1	P09874	CHEMBL3105	Enzyme	0.0	0 / 7
Polyadenylate-binding protein 1	PABPC1	P11940	CHEMBL1293286	Unclassified protein	0.0	0 / 2
Lysine-specific demethylase 2A	KDM2A	Q9Y2K7	CHEMBL1938210	Eraser	0.0	1 / 0
Histone lysine demethylase PHF8	PHF8	Q9UPP1	CHEMBL1938212	Eraser	0.0	1 / 0
Lysine-specific demethylase 5C	KDM5C	P41229	CHEMBL2163176	Eraser	0.0	1 / 0
Protein tyrosine kinase 2 beta	PTK2B	Q14289	CHEMBL5469	Kinase	0.0	1 / 0
3-hydroxyanthranilate 3,4-dioxygenase	HAAO	P46952	CHEMBL3108657	Enzyme	0.0	0 / 1
Serine/threonine-protein kinase PIM1	PIM1	P11309	CHEMBL2147	Kinase	0.0	0 / 12
Serine/threonine-protein kinase PIM2	PIM2	Q9P1W9	CHEMBL4523	Kinase	0.0	0 / 2
Serine/threonine-protein kinase PIM3	PIM3	Q86V86	CHEMBL5407	Kinase	0.0	0 / 13
Muscarinic acetylcholine receptor M2	CHRM2	P08172	CHEMBL211	Family A G protein-coupled receptor	0.0	0 / 1
Acetylcholinesterase (by homology)	ACHE	P22303	CHEMBL220	Hydrolase	0.0	0 / 1
Nuclear receptor subfamily 4 group A member 1	NR4A1	P22736	CHEMBL1293229	Nuclear receptor	0.0	0 / 2
Anandamide amidohydrolase	FAAH	O00519	CHEMBL2243	Enzyme	0.0	0 / 1
Alpha-1d adrenergic receptor	ADRA1D	P25100	CHEMBL223	Family A G protein-coupled receptor	0.0	0 / 1
Cytochrome P450 19A1	CYP19A1	P11511	CHEMBL1978	Cytochrome P450	0.0	0 / 4
Cytochrome P450 11B2	CYP11B2	P19099	CHEMBL2722	Cytochrome P450	0.0	0 / 3
C-C chemokine receptor type 2	CCR2	P41597	CHEMBL4015	Family A G protein-coupled receptor	0.0	0 / 2
Neuronal acetylcholine receptor; alpha4/beta2	CHRNA4 CHRNB2	P43681 P17787	CHEMBL1907589	Ligand-gated ion channel	0.0	0 / 3
Neuronal acetylcholine receptor; alpha3/beta4	CHRNA3 CHRNB4	P32297 P30926	CHEMBL1907594	Ligand-gated ion channel	0.0	0 / 1
Histone deacetylase 8	HDAC8	Q9BY41	CHEMBL3192	Eraser	0.0	0 / 1
Histone deacetylase 1	HDAC1	Q13547	CHEMBL325	Eraser	0.0	0 / 3
Inhibitor of nuclear factor kappa B kinase beta subunit	IKBKB	O14920	CHEMBL1991	Kinase	0.0	0 / 3
Nitric-oxide synthase, brain	NOS1	P29475	CHEMBL3568	Enzyme	0.0	0 / 2
Nitric-oxide synthase, endothelial	NOS3	P29474	CHEMBL4803	Enzyme	0.0	0 / 3
Nitric oxide synthase, inducible	NOS2	P35228	CHEMBL4481	Enzyme	0.0	0 / 2
Stem cell growth factor receptor	KIT	P10721	CHEMBL1936	Kinase	0.0	0 / 1
Platelet-derived growth factor receptor alpha	PDGFRA	P16234	CHEMBL2007	Kinase	0.0	0 / 1
Fibroblast growth factor receptor 3	FGFR3	P22607	CHEMBL2742	Kinase	0.0	0 / 1
Fibroblast growth factor receptor 1	FGFR1	P11362	CHEMBL3650	Kinase	0.0	0 / 1
Serine/threonine-protein kinase/endoribonuclease IRE1	ERN1	O75460	CHEMBL1163101	Enzyme	0.0	0 / 1
Aldose reductase	AKR1B1	P15121	CHEMBL1900	Enzyme	0.0	0 / 1
Monoamine oxidase A	MAOA	P21397	CHEMBL1951	Oxidoreductase	0.0	0 / 1
Farnesyl diphosphate synthase	FDPS	P14324	CHEMBL1782	Transferase	0.0	0 / 1
Cytochrome P450 11B1	CYP11B1	P15538	CHEMBL1908	Cytochrome P450	0.0	0 / 2
Cytochrome P450 3A4	CYP3A4	P08684	CHEMBL340	Cytochrome P450	0.0	0 / 1
Cytochrome P450 17A1	CYP17A1	P05093	CHEMBL3522	Cytochrome P450	0.0	0 / 1
Serine/threonine-protein kinase RAF	RAF1	P04049	CHEMBL1906	Kinase	0.0	0 / 1
Epoxide hydrolase 1	EPHX1	P07099	CHEMBL1968	Protease	0.0	0 / 1
Epoxide hydratase	EPHX2	P34913	CHEMBL2409	Protease	0.0	0 / 2
Tyrosine-protein kinase JAK2	JAK2	O60674	CHEMBL2971	Kinase	0.0	0 / 1
Metabotropic glutamate receptor 5 (by homology)	GRM5	P41594	CHEMBL3227	Family C G protein-coupled receptor	0.0	0 / 1
Serine/threonine-protein kinase Chk1	CHEK1	O14757	CHEMBL4630	Kinase	0.0	0 / 1
Sigma opioid receptor (by homology)	SIGMAR1	Q99720	CHEMBL287	Membrane receptor	0.0	0 / 1
Scavenger receptor class B member 1	SCARB1	Q8WTV0	CHEMBL1914272	Unclassified protein	0.0	0 / 1
Choline acetylase	CHAT	P28329	CHEMBL4039	Enzyme	0.0	0 / 1
Dihydrofolate reductase (by homology)	DHFR	P00374	CHEMBL202	Oxidoreductase	0.0	0 / 1
GABA-A receptor; alpha-1/beta-2/gamma-2	GABRA1 GABRB2 GABRG2	P14867 P47870 P18507	CHEMBL2095172	Ligand-gated ion channel	0.0	0 / 1
GABA A receptor alpha-3/beta-2/gamma-2	GABRA3 GABRB2 GABRG2	P34903 P47870 P18507	CHEMBL2111339	Ligand-gated ion channel	0.0	0 / 1
Cytochrome P450 51	CYP51A1	Q16850	CHEMBL3849	Cytochrome P450	0.0	0 / 1
11-beta-hydroxysteroid dehydrogenase 1	HSD11B1	P28845	CHEMBL4235	Enzyme	0.0	0 / 1
Histone deacetylase 3	HDAC3	O15379	CHEMBL1829	Eraser	0.0	0 / 1
