# Supplementary material for: A Network Pharmacology-Based Study on Irritable Bowel Syndrome Prevention and Treatment Utilizing Shenling Baizhu Powder
Source: Biomed Res Int. 2021 Nov 23;2021:4579850. doi: 10.1155/2021/4579850 (PMC8632384; doi:10.1155/2021/4579850)
Supplement: Supplementary Materials — Please find detailed data in the supplementary file, including the original data of SymMap, metabolomics, and molecular docking of Shenling Baizhu powder. “Shenling Baizhu powder SymMap” includes all herbal targets and combined targets. “Shenling Baizhu powder metabolomics” includes two-dimensional structural data analysis. “Molecular docking” involves molecule-target docking and the results. [file 4579850.f1.zip › Data in brief/2. Shenling Baizhu powder Metabolomics/2D structure/12.csv]

Target	Common name	Uniprot ID	ChEMBL ID	Target Class	Probability*	Known actives (3D/2D)
HMG-CoA reductase	HMGCR	P04035	CHEMBL402	Oxidoreductase	0.187830848266	0 / 4
Solute carrier family 22 member 6 (by homology)	SLC22A6	Q4U2R8	CHEMBL1641347	Electrochemical transporter	0.105843861316	0 / 2
ATP-citrate synthase	ACLY	P53396	CHEMBL3720	Enzyme	0.0544879468076	0 / 1
Neuronal acetylcholine receptor protein alpha-7 subunit (by homology)	CHRNA7	P36544	CHEMBL2492	Ligand-gated ion channel	0.0443083186041	0 / 2
Egl nine homolog 1	EGLN1	Q9GZT9	CHEMBL5697	Oxidoreductase	0.033970689612	0 / 2
Prostanoid EP2 receptor	PTGER2	P43116	CHEMBL1881	Family A G protein-coupled receptor	0.0238327432783	0 / 1
Prostanoid FP receptor	PTGFR	P43088	CHEMBL1987	Family A G protein-coupled receptor	0.0238327432783	0 / 1
Excitatory amino acid transporter 3	SLC1A1	P43005	CHEMBL2721	Electrochemical transporter	0.0238327432783	0 / 2
Squalene synthetase (by homology)	FDFT1	P37268	CHEMBL3338	Enzyme	0.0238327432783	0 / 1
UDP-glucuronosyltransferase 2B7	UGT2B7	P16662	CHEMBL4370	Enzyme	0.0238327432783	0 / 4
Fatty acid binding protein adipocyte	FABP4	P15090	CHEMBL2083	Fatty acid binding protein family	0.0238327432783	0 / 1
Peroxisome proliferator-activated receptor alpha	PPARA	Q07869	CHEMBL239	Nuclear receptor	0.0238327432783	0 / 3
Fatty acid binding protein muscle	FABP3	P05413	CHEMBL3344	Fatty acid binding protein family	0.0238327432783	0 / 1
Fatty acid binding protein epidermal	FABP5	Q01469	CHEMBL3674	Fatty acid binding protein family	0.0238327432783	0 / 1
Peroxisome proliferator-activated receptor delta	PPARD	Q03181	CHEMBL3979	Nuclear receptor	0.0238327432783	0 / 3
Free fatty acid receptor 1	FFAR1	O14842	CHEMBL4422	Family A G protein-coupled receptor	0.0238327432783	0 / 1
Fatty acid binding protein intestinal	FABP2	P12104	CHEMBL4879	Fatty acid binding protein family	0.0238327432783	0 / 1
Alpha-L-fucosidase I	FUCA1	P04066	CHEMBL4176	Enzyme	0.0	10 / 0
Bile acid receptor FXR	NR1H4	Q96RI1	CHEMBL2047	Nuclear receptor	0.0	0 / 10
G-protein coupled bile acid receptor 1	GPBAR1	Q8TDU6	CHEMBL5409	Family A G protein-coupled receptor	0.0	0 / 13
Histone deacetylase 3	HDAC3	O15379	CHEMBL1829	Eraser	0.0	0 / 1
11-beta-hydroxysteroid dehydrogenase 1	HSD11B1	P28845	CHEMBL4235	Enzyme	0.0	0 / 7
G protein-coupled receptor 44	PTGDR2	Q9Y5Y4	CHEMBL5071	Family A G protein-coupled receptor	0.0	1 / 0
Protein farnesyltransferase	FNTA FNTB	P49354 P49356	CHEMBL2094108	Enzyme	0.0	0 / 5
Matrix metalloproteinase 2	MMP2	P08253	CHEMBL333	Protease	0.0	8 / 0
Matrix metalloproteinase 8	MMP8	P22894	CHEMBL4588	Protease	0.0	2 / 0
Adenosine A3 receptor	ADORA3	P0DMS8	CHEMBL256	Family A G protein-coupled receptor	0.0	0 / 1
Metabotropic glutamate receptor 4	GRM4	Q14833	CHEMBL2736	Family C G protein-coupled receptor	0.0	0 / 1
Metabotropic glutamate receptor 3	GRM3	Q14832	CHEMBL2888	Family C G protein-coupled receptor	0.0	0 / 2
Metabotropic glutamate receptor 5	GRM5	P41594	CHEMBL3227	Family C G protein-coupled receptor	0.0	0 / 3
Metabotropic glutamate receptor 8	GRM8	O00222	CHEMBL3228	Family C G protein-coupled receptor	0.0	0 / 2
Glutamate receptor ionotropic kainate 2	GRIK2	Q13002	CHEMBL3683	Ligand-gated ion channel	0.0	0 / 5
Metabotropic glutamate receptor 7	GRM7	Q14831	CHEMBL3777	Family C G protein-coupled receptor	0.0	0 / 1
Metabotropic glutamate receptor 6	GRM6	O15303	CHEMBL4573	Family C G protein-coupled receptor	0.0	0 / 1
Metabotropic glutamate receptor 2	GRM2	Q14416	CHEMBL5137	Family C G protein-coupled receptor	0.0	0 / 8
Matrix metalloproteinase 9	MMP9	P14780	CHEMBL321	Protease	0.0	1 / 0
Carbonic anhydrase XII	CA12	O43570	CHEMBL3242	Lyase	0.0	5 / 0
Androgen Receptor	AR	P10275	CHEMBL1871	Nuclear receptor	0.0	0 / 4
Vitamin D receptor	VDR	P11473	CHEMBL1977	Nuclear receptor	0.0	0 / 1
Dual specificity phosphatase Cdc25A	CDC25A	P30304	CHEMBL3775	Phosphatase	0.0	0 / 3
Aldo-keto reductase family 1 member B10	AKR1B10	O60218	CHEMBL5983	Enzyme	0.0	0 / 2
DNA polymerase beta (by homology)	POLB	P06746	CHEMBL2392	Enzyme	0.0	0 / 2
Angiotensin-converting enzyme	ACE	P12821	CHEMBL1808	Protease	0.0	2 / 0
Niemann-Pick C1-like protein 1	NPC1L1	Q9UHC9	CHEMBL2027	Other membrane protein	0.0	0 / 2
Maltase-glucoamylase	MGAM	O43451	CHEMBL2074	Hydrolase	0.0	14 / 0
Sucrase-isomaltase	SI	P14410	CHEMBL2748	Enzyme	0.0	8 / 0
Dipeptidyl peptidase IV	DPP4	P27487	CHEMBL284	Protease	0.0	0 / 1
Aminopeptidase B	RNPEP	Q9H4A4	CHEMBL2432	Protease	0.0	0 / 1
Glucose-6-phosphate 1-dehydrogenase	G6PD	P11413	CHEMBL5347	Enzyme	0.0	0 / 5
Ceramide glucosyltransferase	UGCG	Q16739	CHEMBL2063	Transferase	0.0	1 / 0
Fructose-1,6-bisphosphatase	FBP1	P09467	CHEMBL3975	Enzyme	0.0	6 / 0
Kynurenine 3-monooxygenase (by homology)	KMO	O15229	CHEMBL2145	Oxidoreductase	0.0	7 / 0
Carboxypeptidase A1	CPA1	P15085	CHEMBL2088	Protease	0.0	2 / 0
Caspase-3	CASP3	P42574	CHEMBL2334	Protease	0.0	1 / 0
Lysine-specific demethylase 4D-like	KDM4E	B2RXH2	CHEMBL1293226	Eraser	0.0	2 / 0
Cytochrome P450 19A1	CYP19A1	P11511	CHEMBL1978	Cytochrome P450	0.0	0 / 3
Corticosteroid binding globulin	SERPINA6	P08185	CHEMBL2421	Secreted protein	0.0	0 / 3
Testis-specific androgen-binding protein	SHBG	P04278	CHEMBL3305	Secreted protein	0.0	0 / 10
Estradiol 17-beta-dehydrogenase 3	HSD17B3	P37058	CHEMBL4234	Enzyme	0.0	0 / 11
Beta-glucocerebrosidase	GBA	P04062	CHEMBL2179	Enzyme	0.0	6 / 0
Alpha-galactosidase A	GLA	P06280	CHEMBL2524	Enzyme	0.0	4 / 0
Prostaglandin E synthase	PTGES	O14684	CHEMBL5658	Enzyme	0.0	0 / 2
Aldose reductase	AKR1B1	P15121	CHEMBL1900	Enzyme	0.0	4 / 0
Lysosomal alpha-glucosidase	GAA	P10253	CHEMBL2608	Hydrolase	0.0	6 / 0
Neutral alpha-glucosidase C	GANC	Q8TET4	CHEMBL2520	Enzyme	0.0	1 / 0
Betaine transporter	SLC6A12	P48065	CHEMBL3715	Electrochemical transporter	0.0	0 / 2
11-beta-hydroxysteroid dehydrogenase 2	HSD11B2	P80365	CHEMBL3746	Enzyme	0.0	0 / 1
Hydroxyacid oxidase 1	HAO1	Q9UJM8	CHEMBL4229	Enzyme	0.0	0 / 1
Neutral alpha-glucosidase AB	GANAB	Q14697	CHEMBL2519	Enzyme	0.0	2 / 0
Solute carrier family 13 member 5	SLC13A5	Q86YT5	CHEMBL3769293	Electrochemical transporter	0.0	4 / 0
Matrix metalloproteinase 1	MMP1	P03956	CHEMBL332	Protease	0.0	1 / 0
Carnitine O-palmitoyltransferase 1, liver isoform (by homology)	CPT1A	P50416	CHEMBL1293194	Enzyme	0.0	0 / 4
Liver glycogen phosphorylase	PYGL	P06737	CHEMBL2568	Enzyme	0.0	2 / 0
Beta-glucosidase	GBA2	Q9HCG7	CHEMBL3761	Enzyme	0.0	1 / 0
Glycogen debranching enzyme	AGL	P35573	CHEMBL5272	Enzyme	0.0	2 / 0
Beta-galactosidase (by homology)	GLB1	P16278	CHEMBL2522	Hydrolase	0.0	1 / 0
Alpha-L-fucosidase 2	FUCA2	Q9BTY2	CHEMBL2271	Enzyme	0.0	1 / 0
Adenosylhomocysteinase (by homology)	AHCY	P23526	CHEMBL2664	Enzyme	0.0	1 / 0
Plasminogen	PLG	P00747	CHEMBL1801	Protease	0.0	0 / 1
Protein-tyrosine phosphatase 1B	PTPN1	P18031	CHEMBL335	Phosphatase	0.0	0 / 1
Glutathione S-transferase kappa 1	GSTK1	Q9Y2Q3	CHEMBL4491	Enzyme	0.0	0 / 1
Leukotriene A4 hydrolase	LTA4H	P09960	CHEMBL4618	Protease	0.0	0 / 1
Uracil nucleotide/cysteinyl leukotriene receptor	GPR17	Q13304	CHEMBL1075162	Family A G protein-coupled receptor	0.0	2 / 0
Leucine aminopeptidase	LAP3	P28838	CHEMBL3965	Protease	0.0	1 / 0
Carbonic anhydrase I	CA1	P00915	CHEMBL261	Lyase	0.0	7 / 3
Carbonic anhydrase IX	CA9	Q16790	CHEMBL3594	Lyase	0.0	6 / 2
Carbonic anhydrase III	CA3	P07451	CHEMBL2885	Lyase	0.0	1 / 0
Carbonic anhydrase XIV	CA14	Q9ULX7	CHEMBL3510	Lyase	0.0	1 / 0
Carbonic anhydrase VB	CA5B	Q9Y2D0	CHEMBL3969	Lyase	0.0	1 / 0
Carbonic anhydrase XIII (by homology)	CA13	Q8N1Q1	CHEMBL3912	Lyase	0.0	1 / 0
Endothelin-converting enzyme 1	ECE1	P42892	CHEMBL4791	Protease	0.0	1 / 0
Lysine-specific demethylase 2A	KDM2A	Q9Y2K7	CHEMBL1938210	Eraser	0.0	2 / 1
Histone lysine demethylase PHF8	PHF8	Q9UPP1	CHEMBL1938212	Eraser	0.0	2 / 1
Lysine-specific demethylase 5C	KDM5C	P41229	CHEMBL2163176	Eraser	0.0	2 / 1
Neprilysin	MME	P08473	CHEMBL1944	Protease	0.0	2 / 0
Epidermal growth factor receptor erbB1	EGFR	P00533	CHEMBL203	Kinase	0.0	1 / 0
Aminopeptidase A	ENPEP	Q07075	CHEMBL3439	Protease	0.0	0 / 1
Endoplasmic reticulum mannosyl-oligosaccharide 1,2-alpha-mannosidase	MAN1B1	Q9UKM7	CHEMBL2308	Enzyme	0.0	1 / 0
Gamma-butyrobetaine dioxygenase	BBOX1	O75936	CHEMBL2163175	Enzyme	0.0	0 / 1
CDC45-related protein	CDC45	O75419	CHEMBL3040	Other nuclear protein	0.0	0 / 1
