# Supplementary material for: A Network Pharmacology-Based Study on Irritable Bowel Syndrome Prevention and Treatment Utilizing Shenling Baizhu Powder
Source: Biomed Res Int. 2021 Nov 23;2021:4579850. doi: 10.1155/2021/4579850 (PMC8632384; doi:10.1155/2021/4579850)
Supplement: Supplementary Materials — Please find detailed data in the supplementary file, including the original data of SymMap, metabolomics, and molecular docking of Shenling Baizhu powder. “Shenling Baizhu powder SymMap” includes all herbal targets and combined targets. “Shenling Baizhu powder metabolomics” includes two-dimensional structural data analysis. “Molecular docking” involves molecule-target docking and the results. [file 4579850.f1.zip › Data in brief/2. Shenling Baizhu powder Metabolomics/2D structure/13.csv]

Target	Common name	Uniprot ID	ChEMBL ID	Target Class	Probability*	Known actives (3D/2D)
Carbonic anhydrase II	CA2	P00918	CHEMBL205	Lyase	0.453904809958	13 / 48
Carbonic anhydrase I	CA1	P00915	CHEMBL261	Lyase	0.453904809958	13 / 47
Carbonic anhydrase XII	CA12	O43570	CHEMBL3242	Lyase	0.453904809958	9 / 30
Carbonic anhydrase IX	CA9	Q16790	CHEMBL3594	Lyase	0.453904809958	8 / 28
Carbonic anhydrase VI	CA6	P23280	CHEMBL3025	Lyase	0.283751568838	4 / 5
Carbonic anhydrase VII	CA7	P43166	CHEMBL2326	Lyase	0.245005854395	5 / 26
Carbonic anhydrase XIV	CA14	Q9ULX7	CHEMBL3510	Lyase	0.245005854395	5 / 26
Carbonic anhydrase IV	CA4	P22748	CHEMBL3729	Lyase	0.226173407881	3 / 4
L-lactate dehydrogenase A chain	LDHA	P00338	CHEMBL4835	Enzyme	0.101228839251	0 / 14
L-lactate dehydrogenase B chain	LDHB	P07195	CHEMBL4940	Enzyme	0.101228839251	0 / 11
Carbonic anhydrase III	CA3	P07451	CHEMBL2885	Lyase	0.0630257148888	2 / 3
Carbonic anhydrase VB	CA5B	Q9Y2D0	CHEMBL3969	Lyase	0.0630257148888	2 / 2
Carbonic anhydrase VA	CA5A	P35218	CHEMBL4789	Lyase	0.0630257148888	2 / 3
Carbonic anhydrase XIII (by homology)	CA13	Q8N1Q1	CHEMBL3912	Lyase	0.0630257148888	2 / 2
Serum albumin	ALB	P02768	CHEMBL3253	Secreted protein	0.053517944289	0 / 5
Catechol O-methyltransferase (by homology)	COMT	P21964	CHEMBL2023	Transferase	0.0439186325197	0 / 5
Apoptosis regulator Bcl-X	BCL2L1	Q07817	CHEMBL4625	Other ion channel	0.0439186325197	0 / 2
Squalene monooxygenase (by homology)	SQLE	Q14534	CHEMBL3592	Enzyme	0.0439186325197	0 / 4
Serine/threonine-protein kinase/endoribonuclease IRE1	ERN1	O75460	CHEMBL1163101	Enzyme	0.0439186325197	0 / 53
Aldo-keto-reductase family 1 member C3	AKR1C3	P42330	CHEMBL4681	Enzyme	0.0439186325197	0 / 3
G-protein coupled receptor 35	GPR35	Q9HC97	CHEMBL1293267	Family A G protein-coupled receptor	0.0439186325197	0 / 2
Alpha-(1,3)-fucosyltransferase 7	FUT7	Q11130	CHEMBL3596077	Transferase	0.0439186325197	1 / 2
Transthyretin	TTR	P02766	CHEMBL3194	Secreted protein	0.0	0 / 6
Insulin-like growth factor I receptor	IGF1R	P08069	CHEMBL1957	Kinase	0.0	0 / 3
ALK tyrosine kinase receptor	ALK	Q9UM73	CHEMBL4247	Kinase	0.0	0 / 3
Histone deacetylase 6	HDAC6	Q9UBN7	CHEMBL1865	Eraser	0.0	1 / 0
Histone deacetylase 8	HDAC8	Q9BY41	CHEMBL3192	Eraser	0.0	1 / 0
Tyrosinase	TYR	P14679	CHEMBL1973	Oxidoreductase	0.0	0 / 3
Estrogen receptor beta	ESR2	Q92731	CHEMBL242	Nuclear receptor	0.0	0 / 5
Matrix metalloproteinase 9	MMP9	P14780	CHEMBL321	Protease	0.0	1 / 0
Matrix metalloproteinase 1	MMP1	P03956	CHEMBL332	Protease	0.0	1 / 0
Matrix metalloproteinase 2	MMP2	P08253	CHEMBL333	Protease	0.0	1 / 0
Matrix metalloproteinase 8	MMP8	P22894	CHEMBL4588	Protease	0.0	1 / 0
Aldo-keto reductase family 1 member C2	AKR1C2	P52895	CHEMBL5847	Enzyme	0.0	2 / 10
Aldo-keto reductase family 1 member C1	AKR1C1	Q04828	CHEMBL5905	Enzyme	0.0	2 / 10
Induced myeloid leukemia cell differentiation protein Mcl-1	MCL1	Q07820	CHEMBL4361	Other cytosolic protein	0.0	0 / 7
Poly [ADP-ribose] polymerase-1	PARP1	P09874	CHEMBL3105	Enzyme	0.0	0 / 2
Plasminogen activator inhibitor-1	SERPINE1	P05121	CHEMBL3475	Secreted protein	0.0	0 / 8
DNA polymerase beta	POLB	P06746	CHEMBL2392	Enzyme	0.0	0 / 2
Receptor-type tyrosine-protein phosphatase beta	PTPRB	P23467	CHEMBL2706	Phosphatase	0.0	2 / 0
Serine/threonine-protein kinase Aurora-B	AURKB	Q96GD4	CHEMBL2185	Kinase	0.0	0 / 1
Tyrosine-protein kinase SRC	SRC	P12931	CHEMBL267	Kinase	0.0	0 / 1
Focal adhesion kinase 1	PTK2	Q05397	CHEMBL2695	Kinase	0.0	0 / 1
Vascular endothelial growth factor receptor 2	KDR	P35968	CHEMBL279	Kinase	0.0	0 / 1
Hepatocyte growth factor receptor	MET	P08581	CHEMBL3717	Kinase	0.0	0 / 2
Serine/threonine-protein kinase NEK2	NEK2	P51955	CHEMBL3835	Kinase	0.0	0 / 1
Tyrosine-protein kinase receptor UFO	AXL	P30530	CHEMBL4895	Kinase	0.0	0 / 2
Cannabinoid receptor 2	CNR2	P34972	CHEMBL253	Family A G protein-coupled receptor	0.0	0 / 5
Thymidylate synthase	TYMS	P04818	CHEMBL1952	Transferase	0.0	0 / 4
Cyclooxygenase-1	PTGS1	P23219	CHEMBL221	Oxidoreductase	0.0	0 / 2
Cyclooxygenase-2	PTGS2	P35354	CHEMBL230	Oxidoreductase	0.0	0 / 2
T-cell protein-tyrosine phosphatase	PTPN2	P17706	CHEMBL3807	Phosphatase	0.0	1 / 0
Steroid 5-alpha-reductase 2	SRD5A2	P31213	CHEMBL1856	Oxidoreductase	0.0	0 / 13
Beta-glucocerebrosidase	GBA	P04062	CHEMBL2179	Enzyme	0.0	1 / 0
Epidermal growth factor receptor erbB1	EGFR	P00533	CHEMBL203	Kinase	0.0	0 / 2
SUMO-activating enzyme subunit 1	SAE1	Q9UBE0	CHEMBL1615388	Unclassified protein	0.0	0 / 2
Histone acetyltransferase p300	EP300	Q09472	CHEMBL3784	Writer	0.0	0 / 1
Histone acetyltransferase PCAF	KAT2B	Q92831	CHEMBL5500	Writer	0.0	0 / 1
Retinoic acid receptor gamma	RARG	P13631	CHEMBL2003	Nuclear receptor	0.0	0 / 3
Retinoic acid receptor beta	RARB	P10826	CHEMBL2008	Nuclear receptor	0.0	0 / 3
Dual-specificity tyrosine-phosphorylation regulated kinase 1A	DYRK1A	Q13627	CHEMBL2292	Kinase	0.0	0 / 1
Dual specificty protein kinase CLK1	CLK1	P49759	CHEMBL4224	Kinase	0.0	0 / 1
Dual specificity tyrosine-phosphorylation-regulated kinase 1B	DYRK1B	Q9Y463	CHEMBL5543	Kinase	0.0	0 / 1
Bifunctional protein NCOAT	OGA	O60502	CHEMBL5921	Enzyme	0.0	1 / 0
Tyrosine-protein kinase FYN	FYN	P06241	CHEMBL1841	Kinase	0.0	0 / 1
Tyrosine-protein kinase LCK	LCK	P06239	CHEMBL258	Kinase	0.0	0 / 2
Cytochrome P450 19A1	CYP19A1	P11511	CHEMBL1978	Cytochrome P450	0.0	0 / 1
C-terminal-binding protein 2	CTBP2	P56545	CHEMBL3797016	Unclassified protein	0.0	2 / 0
Monoamine oxidase B	MAOB	P27338	CHEMBL2039	Oxidoreductase	0.0	0 / 21
Dipeptidyl peptidase IV	DPP4	P27487	CHEMBL284	Protease	0.0	1 / 1
Tubulin beta-1 chain	TUBB1	Q9H4B7	CHEMBL1915	Structural protein	0.0	0 / 1
Acetylcholinesterase	ACHE	P22303	CHEMBL220	Hydrolase	0.0	0 / 3
Aminopeptidase A	ENPEP	Q07075	CHEMBL3439	Protease	0.0	1 / 0
Toll-like receptor 4 (by homology)	TLR4	O00206	CHEMBL5255	Toll-like and Il-1 receptors	0.0	1 / 0
Aldose reductase	AKR1B1	P15121	CHEMBL1900	Enzyme	0.0	1 / 0
Leucine aminopeptidase	LAP3	P28838	CHEMBL3965	Protease	0.0	1 / 0
Fatty acid synthase	FASN	P49327	CHEMBL4158	Transferase	0.0	0 / 1
D-amino-acid oxidase	DAO	P14920	CHEMBL5485	Enzyme	0.0	1 / 1
Estrogen receptor alpha	ESR1	P03372	CHEMBL206	Nuclear receptor	0.0	0 / 2
Lysine-specific demethylase 3A	KDM3A	Q9Y4C1	CHEMBL1938209	Eraser	0.0	1 / 0
Lysine-specific demethylase 6B	KDM6B	O15054	CHEMBL1938211	Eraser	0.0	1 / 0
Cytidine deaminase	CDA	P32320	CHEMBL4502	Enzyme	0.0	2 / 0
Lysine-specific demethylase 4A	KDM4A	O75164	CHEMBL5896	Eraser	0.0	2 / 0
Lysine-specific demethylase 4C	KDM4C	Q9H3R0	CHEMBL6175	Eraser	0.0	1 / 0
Peptidyl-prolyl cis-trans isomerase NIMA-interacting 1	PIN1	Q13526	CHEMBL2288	Enzyme	0.0	2 / 0
Monoamine oxidase A	MAOA	P21397	CHEMBL1951	Oxidoreductase	0.0	0 / 5
Dopamine transporter	SLC6A3	Q01959	CHEMBL238	Electrochemical transporter	0.0	0 / 1
AICAR transformylase	ATIC	P31939	CHEMBL2518	Enzyme	0.0	0 / 1
Arachidonate 12-lipoxygenase	ALOX12	P18054	CHEMBL3687	Enzyme	0.0	0 / 1
Heat shock protein HSP 90-alpha	HSP90AA1	P07900	CHEMBL3880	Other cytosolic protein	0.0	0 / 2
Indoleamine 2,3-dioxygenase	IDO1	P14902	CHEMBL4685	Enzyme	0.0	0 / 3
Protein-tyrosine phosphatase 1B	PTPN1	P18031	CHEMBL335	Phosphatase	0.0	4 / 5
Alpha-2a adrenergic receptor	ADRA2A	P08913	CHEMBL1867	Family A G protein-coupled receptor	0.0	0 / 1
Adrenergic receptor alpha-2	ADRA2C	P18825	CHEMBL1916	Family A G protein-coupled receptor	0.0	0 / 1
Adrenergic receptor beta	ADRB2	P07550	CHEMBL210	Family A G protein-coupled receptor	0.0	0 / 1
Dopamine D2 receptor	DRD2	P14416	CHEMBL217	Family A G protein-coupled receptor	0.0	0 / 1
Alpha-1a adrenergic receptor	ADRA1A	P35348	CHEMBL229	Family A G protein-coupled receptor	0.0	0 / 2
Alpha-2b adrenergic receptor (by homology)	ADRA2B	P18089	CHEMBL1942	Family A G protein-coupled receptor	0.0	0 / 1
Beta-1 adrenergic receptor (by homology)	ADRB1	P08588	CHEMBL213	Family A G protein-coupled receptor	0.0	0 / 1
Myeloperoxidase	MPO	P05164	CHEMBL2439	Enzyme	0.0	0 / 1
