# Supplementary material for: A Network Pharmacology-Based Study on Irritable Bowel Syndrome Prevention and Treatment Utilizing Shenling Baizhu Powder
Source: Biomed Res Int. 2021 Nov 23;2021:4579850. doi: 10.1155/2021/4579850 (PMC8632384; doi:10.1155/2021/4579850)
Supplement: Supplementary Materials — Please find detailed data in the supplementary file, including the original data of SymMap, metabolomics, and molecular docking of Shenling Baizhu powder. “Shenling Baizhu powder SymMap” includes all herbal targets and combined targets. “Shenling Baizhu powder metabolomics” includes two-dimensional structural data analysis. “Molecular docking” involves molecule-target docking and the results. [file 4579850.f1.zip › Data in brief/2. Shenling Baizhu powder Metabolomics/2D structure/14.csv]

Target	Common name	Uniprot ID	ChEMBL ID	Target Class	Probability*	Known actives (3D/2D)
Aldose reductase	AKR1B1	P15121	CHEMBL1900	Enzyme	1.0	28 / 38
Carbonic anhydrase II	CA2	P00918	CHEMBL205	Lyase	1.0	21 / 14
Carbonic anhydrase VII	CA7	P43166	CHEMBL2326	Lyase	1.0	6 / 18
Estrogen receptor beta	ESR2	Q92731	CHEMBL242	Nuclear receptor	1.0	1 / 12
Carbonic anhydrase I	CA1	P00915	CHEMBL261	Lyase	1.0	18 / 18
Carbonic anhydrase III	CA3	P07451	CHEMBL2885	Lyase	1.0	4 / 4
Carbonic anhydrase VI	CA6	P23280	CHEMBL3025	Lyase	1.0	7 / 15
Carbonic anhydrase XII	CA12	O43570	CHEMBL3242	Lyase	1.0	11 / 14
Carbonic anhydrase XIV	CA14	Q9ULX7	CHEMBL3510	Lyase	1.0	7 / 18
Carbonic anhydrase IX	CA9	Q16790	CHEMBL3594	Lyase	1.0	10 / 19
Carbonic anhydrase IV	CA4	P22748	CHEMBL3729	Lyase	1.0	2 / 7
Carbonic anhydrase VB	CA5B	Q9Y2D0	CHEMBL3969	Lyase	1.0	5 / 14
Carbonic anhydrase VA	CA5A	P35218	CHEMBL4789	Lyase	1.0	6 / 15
Macrophage migration inhibitory factor	MIF	P14174	CHEMBL2085	Enzyme	0.258510080397	1 / 1
Arachidonate 5-lipoxygenase	ALOX5	P09917	CHEMBL215	Oxidoreductase	0.21654992169	1 / 21
Matrix metalloproteinase 9	MMP9	P14780	CHEMBL321	Protease	0.21654992169	2 / 19
Matrix metalloproteinase 1	MMP1	P03956	CHEMBL332	Protease	0.21654992169	2 / 18
Matrix metalloproteinase 2	MMP2	P08253	CHEMBL333	Protease	0.21654992169	2 / 20
Protein-tyrosine phosphatase 1B	PTPN1	P18031	CHEMBL335	Phosphatase	0.21654992169	13 / 2
Aldo-keto reductase family 1 member B10	AKR1B10	O60218	CHEMBL5983	Enzyme	0.158397607491	0 / 18
Toll-like receptor 4 (by homology)	TLR4	O00206	CHEMBL5255	Toll-like and Il-1 receptors	0.133391037839	0 / 22
Carbonic anhydrase XIII (by homology)	CA13	Q8N1Q1	CHEMBL3912	Lyase	0.133391037839	2 / 11
Lysine-specific demethylase 4D-like	KDM4E	B2RXH2	CHEMBL1293226	Eraser	0.133391037839	3 / 0
Lysine-specific demethylase 4A	KDM4A	O75164	CHEMBL5896	Eraser	0.133391037839	4 / 0
Lysine-specific demethylase 3A	KDM3A	Q9Y4C1	CHEMBL1938209	Eraser	0.133391037839	2 / 0
Lysine-specific demethylase 6B	KDM6B	O15054	CHEMBL1938211	Eraser	0.133391037839	2 / 0
Alpha-ketoglutarate-dependent dioxygenase FTO	FTO	Q9C0B1	CHEMBL2331065	Oxidoreductase	0.133391037839	2 / 0
Lysine-specific demethylase 4C	KDM4C	Q9H3R0	CHEMBL6175	Eraser	0.133391037839	3 / 0
Coagulation factor VII/tissue factor	F3	P13726	CHEMBL4081	Surface antigen	0.125075959828	0 / 10
11-beta-hydroxysteroid dehydrogenase 1	HSD11B1	P28845	CHEMBL4235	Enzyme	0.125075959828	0 / 6
Hydroxycarboxylic acid receptor 2	HCAR2	Q8TDS4	CHEMBL3785	Family A G protein-coupled receptor	0.125075959828	10 / 1
Thiopurine S-methyltransferase	TPMT	P51580	CHEMBL2500	Enzyme	0.125075959828	4 / 0
D-amino-acid oxidase	DAO	P14920	CHEMBL5485	Enzyme	0.116739032206	5 / 0
Transient receptor potential cation channel subfamily A member 1	TRPA1	O75762	CHEMBL6007	Voltage-gated ion channel	0.116739032206	0 / 1
Low affinity neurotrophin receptor p75NTR	NGFR	P08138	CHEMBL4762	Membrane receptor	0.116739032206	1 / 0
Estrogen receptor alpha	ESR1	P03372	CHEMBL206	Nuclear receptor	0.116739032206	0 / 25
Progesterone receptor	PGR	P06401	CHEMBL208	Nuclear receptor	0.116739032206	0 / 2
Tyrosine-protein kinase FYN	FYN	P06241	CHEMBL1841	Kinase	0.0	2 / 2
Tyrosine-protein kinase LCK	LCK	P06239	CHEMBL258	Kinase	0.0	2 / 6
Kynurenine 3-monooxygenase (by homology)	KMO	O15229	CHEMBL2145	Oxidoreductase	0.0	10 / 0
Glycogen synthase kinase-3 beta	GSK3B	P49841	CHEMBL262	Kinase	0.0	0 / 8
Toll-like receptor (TLR7/TLR9)	TLR9	Q9NR96	CHEMBL5804	Toll-like and Il-1 receptors	0.0	0 / 4
Receptor protein-tyrosine kinase erbB-2	ERBB2	P04626	CHEMBL1824	Kinase	0.0	0 / 2
Norepinephrine transporter	SLC6A2	P23975	CHEMBL222	Electrochemical transporter	0.0	0 / 3
MAP kinase ERK2	MAPK1	P28482	CHEMBL4040	Kinase	0.0	0 / 1
Aldo-keto reductase family 1 member C4	AKR1C4	P17516	CHEMBL4999	Enzyme	0.0	0 / 1
Carboxypeptidase A1	CPA1	P15085	CHEMBL2088	Protease	0.0	9 / 0
Lysine-specific demethylase 2A	KDM2A	Q9Y2K7	CHEMBL1938210	Eraser	0.0	2 / 0
Cyclooxygenase-1	PTGS1	P23219	CHEMBL221	Oxidoreductase	0.0	1 / 11
Quinone reductase 2	NQO2	P16083	CHEMBL3959	Enzyme	0.0	0 / 13
Monocarboxylate transporter 1 (by homology)	SLC16A1	P53985	CHEMBL4360	Electrochemical transporter	0.0	2 / 16
C-terminal-binding protein 2	CTBP2	P56545	CHEMBL3797016	Unclassified protein	0.0	13 / 0
Epidermal growth factor receptor erbB1	EGFR	P00533	CHEMBL203	Kinase	0.0	1 / 15
Dual-specificity tyrosine-phosphorylation regulated kinase 1A	DYRK1A	Q13627	CHEMBL2292	Kinase	0.0	0 / 6
Beta amyloid A4 protein	APP	P05067	CHEMBL2487	Membrane receptor	0.0	0 / 26
PI3-kinase p110-beta subunit	PIK3CB	P42338	CHEMBL3145	Enzyme	0.0	0 / 1
Cytochrome P450 1A2	CYP1A2	P05177	CHEMBL3356	Cytochrome P450	0.0	0 / 4
Cytochrome P450 2C9	CYP2C9	P11712	CHEMBL3397	Cytochrome P450	0.0	0 / 2
Cytochrome P450 3A4	CYP3A4	P08684	CHEMBL340	Cytochrome P450	0.0	0 / 2
Cytochrome P450 2C19	CYP2C19	P33261	CHEMBL3622	Cytochrome P450	0.0	0 / 2
PI3-kinase p110-alpha subunit	PIK3CA	P42336	CHEMBL4005	Enzyme	0.0	0 / 1
Dual specificity tyrosine-phosphorylation-regulated kinase 1B	DYRK1B	Q9Y463	CHEMBL5543	Kinase	0.0	0 / 5
Nuclear factor NF-kappa-B p65 subunit	RELA	Q04206	CHEMBL5533	Transcription factor	0.0	0 / 11
Cyclooxygenase-2	PTGS2	P35354	CHEMBL230	Oxidoreductase	0.0	3 / 11
Uracil nucleotide/cysteinyl leukotriene receptor	GPR17	Q13304	CHEMBL1075162	Family A G protein-coupled receptor	0.0	2 / 0
Fructose-1,6-bisphosphatase	FBP1	P09467	CHEMBL3975	Enzyme	0.0	13 / 0
Leukocyte elastase	ELANE	P08246	CHEMBL248	Protease	0.0	0 / 2
Tyrosine-protein kinase SYK	SYK	P43405	CHEMBL2599	Kinase	0.0	0 / 1
Steroid 5-alpha-reductase 2	SRD5A2	P31213	CHEMBL1856	Oxidoreductase	0.0	0 / 1
G protein-coupled receptor 44	PTGDR2	Q9Y5Y4	CHEMBL5071	Family A G protein-coupled receptor	0.0	1 / 0
Calpain 2	CAPN2	P17655	CHEMBL2382	Protease	0.0	0 / 1
Calpain 1	CAPN1	P07384	CHEMBL3891	Protease	0.0	0 / 1
Indoleamine 2,3-dioxygenase	IDO1	P14902	CHEMBL4685	Enzyme	0.0	0 / 1
Tyrosine-protein kinase SRC	SRC	P12931	CHEMBL267	Kinase	0.0	0 / 2
Serine/threonine-protein kinase EEF2K	EEF2K	O00418	CHEMBL5026	Kinase	0.0	0 / 2
Protein kinase C theta	PRKCQ	Q04759	CHEMBL3920	Kinase	0.0	0 / 1
Prostanoid EP4 receptor	PTGER4	P35408	CHEMBL1836	Family A G protein-coupled receptor	0.0	0 / 6
Prostanoid EP2 receptor	PTGER2	P43116	CHEMBL1881	Family A G protein-coupled receptor	0.0	0 / 7
Prostanoid EP3 receptor	PTGER3	P43115	CHEMBL3710	Family A G protein-coupled receptor	0.0	0 / 8
Nuclear factor erythroid 2-related factor 2	NFE2L2	Q16236	CHEMBL1075094	Unclassified protein	0.0	0 / 3
Signal transducer and activator of transcription 3	STAT3	P40763	CHEMBL4026	Transcription factor	0.0	0 / 1
Protein-arginine N-methyltransferase 1	PRMT1	Q99873	CHEMBL5524	Writer	0.0	0 / 1
Interferon-induced, double-stranded RNA-activated protein kinase	EIF2AK2	P19525	CHEMBL5785	Kinase	0.0	0 / 1
Glutamate carboxypeptidase II	FOLH1	Q04609	CHEMBL1892	Protease	0.0	9 / 0
Matrix metalloproteinase 8	MMP8	P22894	CHEMBL4588	Protease	0.0	1 / 0
Monoamine oxidase B	MAOB	P27338	CHEMBL2039	Oxidoreductase	0.0	2 / 22
Hepatocyte growth factor receptor	MET	P08581	CHEMBL3717	Kinase	0.0	0 / 18
Aldehyde dehydrogenase	ALDH2	P05091	CHEMBL1935	Oxidoreductase	0.0	0 / 1
Alkaline phosphatase, tissue-nonspecific isozyme	ALPL	P05186	CHEMBL5979	Enzyme	0.0	6 / 0
Endothelin-converting enzyme 1	ECE1	P42892	CHEMBL4791	Protease	0.0	2 / 0
Neprilysin	MME	P08473	CHEMBL1944	Protease	0.0	6 / 0
Solute carrier family 13 member 5	SLC13A5	Q86YT5	CHEMBL3769293	Electrochemical transporter	0.0	9 / 0
Estradiol 17-beta-dehydrogenase 2	HSD17B2	P37059	CHEMBL2789	Enzyme	0.0	0 / 1
Estradiol 17-beta-dehydrogenase 1	HSD17B1	P14061	CHEMBL3181	Enzyme	0.0	0 / 1
Dual specificty protein kinase CLK1	CLK1	P49759	CHEMBL4224	Kinase	0.0	0 / 2
Leucine aminopeptidase	LAP3	P28838	CHEMBL3965	Protease	0.0	1 / 0
Dipeptidyl peptidase IV	DPP4	P27487	CHEMBL284	Protease	0.0	2 / 0
T-cell protein-tyrosine phosphatase	PTPN2	P17706	CHEMBL3807	Phosphatase	0.0	2 / 0
Cyclin-dependent kinase 4/cyclin D1	CCND1 CDK4	P24385 P11802	CHEMBL1907601	Kinase	0.0	0 / 1
CDC7/DBF4 (Cell division cycle 7-related protein kinase/Activator of S phase kinase)	DBF4 CDC7	Q9UBU7 O00311	CHEMBL2111377	Kinase	0.0	1 / 0
