# Supplementary material for: A Network Pharmacology-Based Study on Irritable Bowel Syndrome Prevention and Treatment Utilizing Shenling Baizhu Powder
Source: Biomed Res Int. 2021 Nov 23;2021:4579850. doi: 10.1155/2021/4579850 (PMC8632384; doi:10.1155/2021/4579850)
Supplement: Supplementary Materials — Please find detailed data in the supplementary file, including the original data of SymMap, metabolomics, and molecular docking of Shenling Baizhu powder. “Shenling Baizhu powder SymMap” includes all herbal targets and combined targets. “Shenling Baizhu powder metabolomics” includes two-dimensional structural data analysis. “Molecular docking” involves molecule-target docking and the results. [file 4579850.f1.zip › Data in brief/2. Shenling Baizhu powder Metabolomics/2D structure/16.csv]

Target	Common name	Uniprot ID	ChEMBL ID	Target Class	Probability*	Known actives (3D/2D)
Carbonic anhydrase II	CA2	P00918	CHEMBL205	Lyase	0.141787380829	0 / 52
Carbonic anhydrase I	CA1	P00915	CHEMBL261	Lyase	0.141787380829	0 / 51
D-amino-acid oxidase	DAO	P14920	CHEMBL5485	Enzyme	0.141787380829	3 / 1
Steroid 5-alpha-reductase 2	SRD5A2	P31213	CHEMBL1856	Oxidoreductase	0.125075959828	0 / 22
Carbonic anhydrase VII	CA7	P43166	CHEMBL2326	Lyase	0.125075959828	0 / 28
Carbonic anhydrase III	CA3	P07451	CHEMBL2885	Lyase	0.125075959828	0 / 4
Carbonic anhydrase VI	CA6	P23280	CHEMBL3025	Lyase	0.125075959828	0 / 7
Carbonic anhydrase XII	CA12	O43570	CHEMBL3242	Lyase	0.125075959828	0 / 35
Carbonic anhydrase XIV	CA14	Q9ULX7	CHEMBL3510	Lyase	0.125075959828	0 / 29
Carbonic anhydrase IX	CA9	Q16790	CHEMBL3594	Lyase	0.125075959828	0 / 33
Carbonic anhydrase IV	CA4	P22748	CHEMBL3729	Lyase	0.125075959828	0 / 5
Carbonic anhydrase XIII (by homology)	CA13	Q8N1Q1	CHEMBL3912	Lyase	0.125075959828	0 / 3
Carbonic anhydrase VB	CA5B	Q9Y2D0	CHEMBL3969	Lyase	0.125075959828	0 / 4
Carbonic anhydrase VA	CA5A	P35218	CHEMBL4789	Lyase	0.125075959828	0 / 5
Fatty acid binding protein adipocyte	FABP4	P15090	CHEMBL2083	Fatty acid binding protein family	0.116739032206	0 / 1
Fatty acid binding protein muscle	FABP3	P05413	CHEMBL3344	Fatty acid binding protein family	0.116739032206	0 / 1
Thymidylate synthase	TYMS	P04818	CHEMBL1952	Transferase	0.0	0 / 4
Serine/threonine-protein kinase/endoribonuclease IRE1	ERN1	O75460	CHEMBL1163101	Enzyme	0.0	0 / 10
Group IID secretory phospholipase A2	PLA2G2D	Q9UNK4	CHEMBL4281	Enzyme	0.0	0 / 1
L-lactate dehydrogenase A chain	LDHA	P00338	CHEMBL4835	Enzyme	0.0	0 / 7
L-lactate dehydrogenase B chain	LDHB	P07195	CHEMBL4940	Enzyme	0.0	0 / 7
Glutamate carboxypeptidase II	FOLH1	Q04609	CHEMBL1892	Protease	0.0	0 / 3
Acyl coenzyme A:cholesterol acyltransferase	CES1	P23141	CHEMBL2265	Enzyme	0.0	0 / 6
Carboxylesterase 2	CES2	O00748	CHEMBL3180	Enzyme	0.0	0 / 6
Alpha-(1,3)-fucosyltransferase 7	FUT7	Q11130	CHEMBL3596077	Transferase	0.0	0 / 2
Retinoic acid receptor gamma	RARG	P13631	CHEMBL2003	Nuclear receptor	0.0	0 / 6
Retinoic acid receptor beta	RARB	P10826	CHEMBL2008	Nuclear receptor	0.0	0 / 8
Hypoxia-inducible factor prolyl 4-hydroxylase	P4HTM	Q9NXG6	CHEMBL3047	Enzyme	0.0	3 / 0
Estrogen receptor beta	ESR2	Q92731	CHEMBL242	Nuclear receptor	0.0	0 / 2
Thiopurine S-methyltransferase	TPMT	P51580	CHEMBL2500	Enzyme	0.0	0 / 1
Prolyl 4-hydroxylase subunit alpha-1	P4HA1	P13674	CHEMBL1250350	Enzyme	0.0	1 / 0
Aldo-keto-reductase family 1 member C3	AKR1C3	P42330	CHEMBL4681	Enzyme	0.0	0 / 23
Aldo-keto reductase family 1 member C2	AKR1C2	P52895	CHEMBL5847	Enzyme	0.0	0 / 7
Indoleamine 2,3-dioxygenase	IDO1	P14902	CHEMBL4685	Enzyme	0.0	0 / 3
Solute carrier family 22 member 6 (by homology)	SLC22A6	Q4U2R8	CHEMBL1641347	Electrochemical transporter	0.0	1 / 0
WD repeat-containing protein 5	WDR5	P61964	CHEMBL1075317	Unclassified protein	0.0	0 / 1
Cystine/glutamate transporter	SLC7A11	Q9UPY5	CHEMBL1075149	Electrochemical transporter	0.0	0 / 1
Retinoic acid receptor alpha	RARA	P10276	CHEMBL2055	Nuclear receptor	0.0	0 / 3
Serum albumin	ALB	P02768	CHEMBL3253	Secreted protein	0.0	0 / 1
Aminopeptidase N	ANPEP	P15144	CHEMBL1907	Protease	0.0	0 / 2
Poly [ADP-ribose] polymerase-1	PARP1	P09874	CHEMBL3105	Enzyme	0.0	0 / 1
Aminopeptidase A	ENPEP	Q07075	CHEMBL3439	Protease	0.0	0 / 2
Toll-like receptor 4 (by homology)	TLR4	O00206	CHEMBL5255	Toll-like and Il-1 receptors	0.0	2 / 0
Tyrosine-protein kinase FYN	FYN	P06241	CHEMBL1841	Kinase	0.0	1 / 0
Tyrosine-protein kinase LCK	LCK	P06239	CHEMBL258	Kinase	0.0	1 / 0
Serotonin transporter	SLC6A4	P31645	CHEMBL228	Electrochemical transporter	0.0	0 / 1
Dopamine transporter	SLC6A3	Q01959	CHEMBL238	Electrochemical transporter	0.0	0 / 2
Alpha-L-fucosidase I	FUCA1	P04066	CHEMBL4176	Enzyme	0.0	1 / 0
Lysine-specific demethylase 4D-like	KDM4E	B2RXH2	CHEMBL1293226	Eraser	0.0	1 / 0
Lysine-specific demethylase 3A	KDM3A	Q9Y4C1	CHEMBL1938209	Eraser	0.0	1 / 0
Lysine-specific demethylase 2A	KDM2A	Q9Y2K7	CHEMBL1938210	Eraser	0.0	1 / 0
Lysine-specific demethylase 5C	KDM5C	P41229	CHEMBL2163176	Eraser	0.0	1 / 0
Alpha-ketoglutarate-dependent dioxygenase FTO	FTO	Q9C0B1	CHEMBL2331065	Oxidoreductase	0.0	1 / 0
Lysine-specific demethylase 5A	KDM5A	P29375	CHEMBL2424504	Eraser	0.0	1 / 0
Hypoxia-inducible factor prolyl hydroxylase 1	EGLN2	Q96KS0	CHEMBL3028	Enzyme	0.0	1 / 0
Lysine-specific demethylase 5B	KDM5B	Q9UGL1	CHEMBL3774295	Eraser	0.0	1 / 0
Egl nine homolog 1	EGLN1	Q9GZT9	CHEMBL5697	Oxidoreductase	0.0	1 / 0
Egl nine homolog 3	EGLN3	Q9H6Z9	CHEMBL5705	Enzyme	0.0	1 / 0
Lysine-specific demethylase 4A	KDM4A	O75164	CHEMBL5896	Eraser	0.0	1 / 0
Hypoxia-inducible factor 1-alpha inhibitor	HIF1AN	Q9NWT6	CHEMBL5909	Enzyme	0.0	1 / 0
Lysine-specific demethylase 4D	KDM4D	Q6B0I6	CHEMBL6138	Eraser	0.0	1 / 0
Lysine-specific demethylase 4C	KDM4C	Q9H3R0	CHEMBL6175	Eraser	0.0	1 / 0
Aldo-keto reductase family 1 member C1	AKR1C1	Q04828	CHEMBL5905	Enzyme	0.0	0 / 2
Retinoid X receptor beta	RXRB	P28702	CHEMBL1870	Nuclear receptor	0.0	0 / 4
Retinoid X receptor gamma	RXRG	P48443	CHEMBL2004	Nuclear receptor	0.0	0 / 6
Retinoid X receptor alpha	RXRA	P19793	CHEMBL2061	Nuclear receptor	0.0	0 / 11
Apoptosis regulator Bcl-X	BCL2L1	Q07817	CHEMBL4625	Other ion channel	0.0	0 / 1
Squalene monooxygenase (by homology)	SQLE	Q14534	CHEMBL3592	Enzyme	0.0	0 / 1
Tyrosinase	TYR	P14679	CHEMBL1973	Oxidoreductase	0.0	0 / 1
Glycogen synthase kinase-3 beta	GSK3B	P49841	CHEMBL262	Kinase	0.0	0 / 1
Dual specificity phosphatase Cdc25A	CDC25A	P30304	CHEMBL3775	Phosphatase	0.0	0 / 1
Dual specificity phosphatase Cdc25B	CDC25B	P30305	CHEMBL4804	Phosphatase	0.0	0 / 1
Acetylcholinesterase	ACHE	P22303	CHEMBL220	Hydrolase	0.0	0 / 2
LDL-associated phospholipase A2	PLA2G7	Q13093	CHEMBL3514	Enzyme	0.0	0 / 1
Plectin	PLEC	Q15149	CHEMBL1293240	Unclassified protein	0.0	0 / 1
G-protein coupled receptor 35	GPR35	Q9HC97	CHEMBL1293267	Family A G protein-coupled receptor	0.0	0 / 2
Protein kinase C delta	PRKCD	Q05655	CHEMBL2996	Kinase	0.0	0 / 3
Protein kinase C alpha	PRKCA	P17252	CHEMBL299	Kinase	0.0	0 / 3
Induced myeloid leukemia cell differentiation protein Mcl-1	MCL1	Q07820	CHEMBL4361	Other cytosolic protein	0.0	0 / 1
Dihydroorotate dehydrogenase	DHODH	Q02127	CHEMBL1966	Oxidoreductase	0.0	0 / 3
Monoamine oxidase B	MAOB	P27338	CHEMBL2039	Oxidoreductase	0.0	0 / 2
Estrogen receptor alpha	ESR1	P03372	CHEMBL206	Nuclear receptor	0.0	0 / 1
Dipeptidyl peptidase IV	DPP4	P27487	CHEMBL284	Protease	0.0	0 / 1
Transthyretin	TTR	P02766	CHEMBL3194	Secreted protein	0.0	0 / 2
Urokinase-type plasminogen activator	PLAU	P00749	CHEMBL3286	Protease	0.0	0 / 2
Cannabinoid receptor 2	CNR2	P34972	CHEMBL253	Family A G protein-coupled receptor	0.0	0 / 1
Metabotropic glutamate receptor 1	GRM1	Q13255	CHEMBL3772	Family C G protein-coupled receptor	0.0	0 / 1
PH domain leucine-rich repeat-containing protein phosphatase 2	PHLPP2	Q6ZVD8	CHEMBL1275209	Enzyme	0.0	0 / 1
DNA polymerase beta	POLB	P06746	CHEMBL2392	Enzyme	0.0	0 / 1
Delta opioid receptor	OPRD1	P41143	CHEMBL236	Family A G protein-coupled receptor	0.0	0 / 1
Nitric oxide synthase, inducible (by homology)	NOS2	P35228	CHEMBL4481	Enzyme	0.0	0 / 1
Cyclooxygenase-1	PTGS1	P23219	CHEMBL221	Oxidoreductase	0.0	0 / 1
Cyclooxygenase-2	PTGS2	P35354	CHEMBL230	Oxidoreductase	0.0	0 / 1
Protein-tyrosine phosphatase 1B	PTPN1	P18031	CHEMBL335	Phosphatase	0.0	0 / 1
