# Supplementary material for: A Network Pharmacology-Based Study on Irritable Bowel Syndrome Prevention and Treatment Utilizing Shenling Baizhu Powder
Source: Biomed Res Int. 2021 Nov 23;2021:4579850. doi: 10.1155/2021/4579850 (PMC8632384; doi:10.1155/2021/4579850)
Supplement: Supplementary Materials — Please find detailed data in the supplementary file, including the original data of SymMap, metabolomics, and molecular docking of Shenling Baizhu powder. “Shenling Baizhu powder SymMap” includes all herbal targets and combined targets. “Shenling Baizhu powder metabolomics” includes two-dimensional structural data analysis. “Molecular docking” involves molecule-target docking and the results. [file 4579850.f1.zip › Data in brief/2. Shenling Baizhu powder Metabolomics/2D structure/17.csv]

Target	Common name	Uniprot ID	ChEMBL ID	Target Class	Probability*	Known actives (3D/2D)
Carbonic anhydrase II	CA2	P00918	CHEMBL205	Lyase	0.324627823825	31 / 45
Carbonic anhydrase VII	CA7	P43166	CHEMBL2326	Lyase	0.324627823825	9 / 28
Carbonic anhydrase I	CA1	P00915	CHEMBL261	Lyase	0.324627823825	29 / 44
Carbonic anhydrase XII	CA12	O43570	CHEMBL3242	Lyase	0.324627823825	17 / 32
Carbonic anhydrase XIV	CA14	Q9ULX7	CHEMBL3510	Lyase	0.324627823825	10 / 28
Carbonic anhydrase IX	CA9	Q16790	CHEMBL3594	Lyase	0.324627823825	16 / 30
Carbonic anhydrase III	CA3	P07451	CHEMBL2885	Lyase	0.26588241578	4 / 3
Carbonic anhydrase VI	CA6	P23280	CHEMBL3025	Lyase	0.26588241578	8 / 7
Carbonic anhydrase VA	CA5A	P35218	CHEMBL4789	Lyase	0.26588241578	6 / 5
Carbonic anhydrase IV	CA4	P22748	CHEMBL3729	Lyase	0.208479014792	3 / 4
Thiopurine S-methyltransferase	TPMT	P51580	CHEMBL2500	Enzyme	0.183363907619	4 / 4
Transthyretin	TTR	P02766	CHEMBL3194	Secreted protein	0.150097810701	0 / 7
Carbonic anhydrase VB	CA5B	Q9Y2D0	CHEMBL3969	Lyase	0.141787380829	5 / 3
Carbonic anhydrase XIII (by homology)	CA13	Q8N1Q1	CHEMBL3912	Lyase	0.141787380829	2 / 3
Alpha-(1,3)-fucosyltransferase 7	FUT7	Q11130	CHEMBL3596077	Transferase	0.133391037839	0 / 2
Lysine-specific demethylase 4D-like	KDM4E	B2RXH2	CHEMBL1293226	Eraser	0.133391037839	4 / 0
Lysine-specific demethylase 4A	KDM4A	O75164	CHEMBL5896	Eraser	0.133391037839	4 / 0
Lysine-specific demethylase 3A	KDM3A	Q9Y4C1	CHEMBL1938209	Eraser	0.133391037839	2 / 0
Lysine-specific demethylase 6B	KDM6B	O15054	CHEMBL1938211	Eraser	0.133391037839	2 / 0
Alpha-ketoglutarate-dependent dioxygenase FTO	FTO	Q9C0B1	CHEMBL2331065	Oxidoreductase	0.133391037839	2 / 0
Lysine-specific demethylase 4C	KDM4C	Q9H3R0	CHEMBL6175	Eraser	0.133391037839	4 / 0
Tyrosine-protein kinase FYN	FYN	P06241	CHEMBL1841	Kinase	0.125075959828	2 / 1
Tyrosine-protein kinase LCK	LCK	P06239	CHEMBL258	Kinase	0.125075959828	2 / 2
Fructose-1,6-bisphosphatase	FBP1	P09467	CHEMBL3975	Enzyme	0.125075959828	13 / 0
Aldo-keto-reductase family 1 member C3	AKR1C3	P42330	CHEMBL4681	Enzyme	0.125075959828	5 / 18
Lysine-specific demethylase 2A	KDM2A	Q9Y2K7	CHEMBL1938210	Eraser	0.125075959828	3 / 0
Matrix metalloproteinase 9	MMP9	P14780	CHEMBL321	Protease	0.125075959828	2 / 0
Matrix metalloproteinase 1	MMP1	P03956	CHEMBL332	Protease	0.125075959828	2 / 0
Matrix metalloproteinase 2	MMP2	P08253	CHEMBL333	Protease	0.125075959828	2 / 0
Matrix metalloproteinase 8	MMP8	P22894	CHEMBL4588	Protease	0.125075959828	1 / 0
Squalene monooxygenase (by homology)	SQLE	Q14534	CHEMBL3592	Enzyme	0.125075959828	0 / 7
DNA polymerase alpha subunit	POLA1	P09884	CHEMBL1828	Transferase	0.116739032206	0 / 1
DNA polymerase beta	POLB	P06746	CHEMBL2392	Enzyme	0.116739032206	0 / 1
Plasminogen activator inhibitor-1	SERPINE1	P05121	CHEMBL3475	Secreted protein	0.116739032206	0 / 8
Tubulin beta-1 chain	TUBB1	Q9H4B7	CHEMBL1915	Structural protein	0.116739032206	0 / 4
Kynurenine 3-monooxygenase (by homology)	KMO	O15229	CHEMBL2145	Oxidoreductase	0.0	13 / 0
Low affinity neurotrophin receptor p75NTR	NGFR	P08138	CHEMBL4762	Membrane receptor	0.0	1 / 0
Thymidylate synthase	TYMS	P04818	CHEMBL1952	Transferase	0.0	0 / 3
L-lactate dehydrogenase A chain	LDHA	P00338	CHEMBL4835	Enzyme	0.0	0 / 12
L-lactate dehydrogenase B chain	LDHB	P07195	CHEMBL4940	Enzyme	0.0	0 / 10
Leucine aminopeptidase	LAP3	P28838	CHEMBL3965	Protease	0.0	1 / 0
Receptor-type tyrosine-protein phosphatase beta	PTPRB	P23467	CHEMBL2706	Phosphatase	0.0	2 / 0
Uracil nucleotide/cysteinyl leukotriene receptor	GPR17	Q13304	CHEMBL1075162	Family A G protein-coupled receptor	0.0	2 / 0
C-terminal-binding protein 2	CTBP2	P56545	CHEMBL3797016	Unclassified protein	0.0	9 / 0
Macrophage migration inhibitory factor	MIF	P14174	CHEMBL2085	Enzyme	0.0	1 / 0
Insulin-like growth factor I receptor	IGF1R	P08069	CHEMBL1957	Kinase	0.0	0 / 2
ALK tyrosine kinase receptor	ALK	Q9UM73	CHEMBL4247	Kinase	0.0	0 / 2
Steroid 5-alpha-reductase 2	SRD5A2	P31213	CHEMBL1856	Oxidoreductase	0.0	0 / 12
Phospholipase A2 group 1VB	PLA2G4B	P0C869	CHEMBL4136	Enzyme	0.0	0 / 12
DNA ligase 1	LIG1	P18858	CHEMBL5694	Enzyme	0.0	1 / 0
Leukocyte elastase	ELANE	P08246	CHEMBL248	Protease	0.0	0 / 12
Serine/threonine-protein kinase/endoribonuclease IRE1	ERN1	O75460	CHEMBL1163101	Enzyme	0.0	1 / 69
Acetylcholinesterase	ACHE	P22303	CHEMBL220	Hydrolase	0.0	0 / 21
Alpha-L-fucosidase I	FUCA1	P04066	CHEMBL4176	Enzyme	0.0	10 / 0
Dipeptidyl peptidase IV	DPP4	P27487	CHEMBL284	Protease	0.0	2 / 0
Metabotropic glutamate receptor 2 (by homology)	GRM2	Q14416	CHEMBL5137	Family C G protein-coupled receptor	0.0	0 / 29
Solute carrier family 13 member 5	SLC13A5	Q86YT5	CHEMBL3769293	Electrochemical transporter	0.0	8 / 0
Bifunctional protein NCOAT	OGA	O60502	CHEMBL5921	Enzyme	0.0	12 / 0
Heat shock protein HSP 90-alpha	HSP90AA1	P07900	CHEMBL3880	Other cytosolic protein	0.0	0 / 3
Aldose reductase	AKR1B1	P15121	CHEMBL1900	Enzyme	0.0	28 / 1
Catechol O-methyltransferase (by homology)	COMT	P21964	CHEMBL2023	Transferase	0.0	0 / 5
Monoamine oxidase A	MAOA	P21397	CHEMBL1951	Oxidoreductase	0.0	2 / 23
Monoamine oxidase B	MAOB	P27338	CHEMBL2039	Oxidoreductase	0.0	2 / 62
Apoptosis regulator Bcl-X	BCL2L1	Q07817	CHEMBL4625	Other ion channel	0.0	0 / 2
Carboxypeptidase A1	CPA1	P15085	CHEMBL2088	Protease	0.0	10 / 0
Cannabinoid receptor 2	CNR2	P34972	CHEMBL253	Family A G protein-coupled receptor	0.0	0 / 7
Estrogen receptor beta	ESR2	Q92731	CHEMBL242	Nuclear receptor	0.0	2 / 6
Equilibrative nucleoside transporter 1	SLC29A1	Q99808	CHEMBL1997	Electrochemical transporter	0.0	0 / 8
Thymidylate kinase	DTYMK	P23919	CHEMBL4388	Transferase	0.0	1 / 0
Serum albumin	ALB	P02768	CHEMBL3253	Secreted protein	0.0	0 / 3
Caspase-3	CASP3	P42574	CHEMBL2334	Protease	0.0	2 / 0
Testis-specific androgen-binding protein	SHBG	P04278	CHEMBL3305	Secreted protein	0.0	0 / 1
Cytidine deaminase	CDA	P32320	CHEMBL4502	Enzyme	0.0	16 / 0
Retinoid X receptor beta	RXRB	P28702	CHEMBL1870	Nuclear receptor	0.0	0 / 1
Retinoid X receptor gamma	RXRG	P48443	CHEMBL2004	Nuclear receptor	0.0	0 / 2
Retinoid X receptor alpha	RXRA	P19793	CHEMBL2061	Nuclear receptor	0.0	0 / 2
Peptidyl-prolyl cis-trans isomerase NIMA-interacting 1	PIN1	Q13526	CHEMBL2288	Enzyme	0.0	2 / 0
Endothelin-converting enzyme 1	ECE1	P42892	CHEMBL4791	Protease	0.0	2 / 0
DNA-(apurinic or apyrimidinic site) lyase	APEX1	P27695	CHEMBL5619	Enzyme	0.0	1 / 0
Adenosine deaminase	ADA	P00813	CHEMBL1910	Hydrolase	0.0	3 / 0
AMP deaminase 3	AMPD3	Q01432	CHEMBL2912	Enzyme	0.0	3 / 0
Tyrosinase	TYR	P14679	CHEMBL1973	Oxidoreductase	0.0	0 / 3
Angiotensin-converting enzyme	ACE	P12821	CHEMBL1808	Protease	0.0	5 / 0
Transient receptor potential cation channel subfamily M member 8 (by homology)	TRPM8	Q7Z2W7	CHEMBL1075319	Voltage-gated ion channel	0.0	0 / 2
NAALADase II	NAALAD2	Q9Y3Q0	CHEMBL2609	Protease	0.0	5 / 0
Fatty acid binding protein adipocyte	FABP4	P15090	CHEMBL2083	Fatty acid binding protein family	0.0	0 / 1
Fatty acid binding protein muscle	FABP3	P05413	CHEMBL3344	Fatty acid binding protein family	0.0	0 / 1
Fatty acid binding protein epidermal	FABP5	Q01469	CHEMBL3674	Fatty acid binding protein family	0.0	0 / 1
Induced myeloid leukemia cell differentiation protein Mcl-1	MCL1	Q07820	CHEMBL4361	Other cytosolic protein	0.0	0 / 7
Neprilysin	MME	P08473	CHEMBL1944	Protease	0.0	5 / 0
Intercellular adhesion molecule (ICAM-1), Integrin alpha-L/beta-2	ITGAL ICAM1 ITGB2	P20701 P05362 P05107	CHEMBL2096661	Membrane receptor	0.0	2 / 0
Gamma-glutamyl hydrolase	GGH	Q92820	CHEMBL2223	Protease	0.0	1 / 0
Estrogen receptor alpha	ESR1	P03372	CHEMBL206	Nuclear receptor	0.0	0 / 2
Thromboxane-A synthase	TBXAS1	P24557	CHEMBL1835	Cytochrome P450	0.0	0 / 4
Matriptase	ST14	Q9Y5Y6	CHEMBL3018	Protease	0.0	0 / 1
Urokinase-type plasminogen activator	PLAU	P00749	CHEMBL3286	Protease	0.0	0 / 1
HMG-CoA reductase	HMGCR	P04035	CHEMBL402	Oxidoreductase	0.0	0 / 1
Monocarboxylate transporter 1 (by homology)	SLC16A1	P53985	CHEMBL4360	Electrochemical transporter	0.0	2 / 0
Serine/threonine-protein kinase Aurora-B	AURKB	Q96GD4	CHEMBL2185	Kinase	0.0	0 / 1
Tyrosine-protein kinase SRC	SRC	P12931	CHEMBL267	Kinase	0.0	0 / 1
