# Supplementary material for: A Network Pharmacology-Based Study on Irritable Bowel Syndrome Prevention and Treatment Utilizing Shenling Baizhu Powder
Source: Biomed Res Int. 2021 Nov 23;2021:4579850. doi: 10.1155/2021/4579850 (PMC8632384; doi:10.1155/2021/4579850)
Supplement: Supplementary Materials — Please find detailed data in the supplementary file, including the original data of SymMap, metabolomics, and molecular docking of Shenling Baizhu powder. “Shenling Baizhu powder SymMap” includes all herbal targets and combined targets. “Shenling Baizhu powder metabolomics” includes two-dimensional structural data analysis. “Molecular docking” involves molecule-target docking and the results. [file 4579850.f1.zip › Data in brief/2. Shenling Baizhu powder Metabolomics/2D structure/18.csv]

Target	Common name	Uniprot ID	ChEMBL ID	Target Class	Probability*	Known actives (3D/2D)
Serine/threonine-protein kinase/endoribonuclease IRE1	ERN1	O75460	CHEMBL1163101	Enzyme	0.0981627197783	19 / 67
Carbonic anhydrase II	CA2	P00918	CHEMBL205	Lyase	0.0981627197783	0 / 39
Carbonic anhydrase VII	CA7	P43166	CHEMBL2326	Lyase	0.0981627197783	0 / 25
Carbonic anhydrase III	CA3	P07451	CHEMBL2885	Lyase	0.0981627197783	0 / 3
Carbonic anhydrase VI	CA6	P23280	CHEMBL3025	Lyase	0.0981627197783	0 / 6
Carbonic anhydrase XIV	CA14	Q9ULX7	CHEMBL3510	Lyase	0.0981627197783	0 / 25
Carbonic anhydrase VA	CA5A	P35218	CHEMBL4789	Lyase	0.0981627197783	0 / 4
Carbonic anhydrase I	CA1	P00915	CHEMBL261	Lyase	0.0893704742941	1 / 36
Carbonic anhydrase XII	CA12	O43570	CHEMBL3242	Lyase	0.0893704742941	1 / 29
Carbonic anhydrase IX	CA9	Q16790	CHEMBL3594	Lyase	0.0893704742941	1 / 27
Acetylcholinesterase	ACHE	P22303	CHEMBL220	Hydrolase	0.080569968052	0 / 25
Transthyretin	TTR	P02766	CHEMBL3194	Secreted protein	0.080569968052	0 / 7
Carbonic anhydrase IV	CA4	P22748	CHEMBL3729	Lyase	0.0717871625222	0 / 4
DNA excision repair protein ERCC-5	ERCC5	P28715	CHEMBL4736	Other nuclear protein	0.0717871625222	8 / 0
Flap endonuclease 1	FEN1	P39748	CHEMBL5027	Enzyme	0.0717871625222	12 / 0
Tubulin beta-1 chain	TUBB1	Q9H4B7	CHEMBL1915	Structural protein	0.0	0 / 20
HMG-CoA reductase	HMGCR	P04035	CHEMBL402	Oxidoreductase	0.0	0 / 4
Alpha-(1,3)-fucosyltransferase 7	FUT7	Q11130	CHEMBL3596077	Transferase	0.0	0 / 2
Carbonic anhydrase VB	CA5B	Q9Y2D0	CHEMBL3969	Lyase	0.0	0 / 2
Carbonic anhydrase XIII (by homology)	CA13	Q8N1Q1	CHEMBL3912	Lyase	0.0	0 / 2
Aldo-keto-reductase family 1 member C3	AKR1C3	P42330	CHEMBL4681	Enzyme	0.0	0 / 2
Protein tyrosine kinase 2 beta	PTK2B	Q14289	CHEMBL5469	Kinase	0.0	1 / 0
Lysine-specific demethylase 4C	KDM4C	Q9H3R0	CHEMBL6175	Eraser	0.0	1 / 0
Troponin, cardiac muscle	TNNC1 TNNT2 TNNI3	P63316 P45379 P19429	CHEMBL2095202	Unclassified protein	0.0	1 / 0
Matriptase	ST14	Q9Y5Y6	CHEMBL3018	Protease	0.0	0 / 2
Urokinase-type plasminogen activator	PLAU	P00749	CHEMBL3286	Protease	0.0	0 / 2
Tyrosinase (by homology)	TYR	P14679	CHEMBL1973	Oxidoreductase	0.0	0 / 3
DNA polymerase alpha subunit	POLA1	P09884	CHEMBL1828	Transferase	0.0	0 / 1
DNA polymerase beta	POLB	P06746	CHEMBL2392	Enzyme	0.0	0 / 1
Catechol O-methyltransferase (by homology)	COMT	P21964	CHEMBL2023	Transferase	0.0	4 / 5
Ribosomal protein S6 kinase alpha 3	RPS6KA3	P51812	CHEMBL2345	Kinase	0.0	1 / 0
Thiopurine S-methyltransferase	TPMT	P51580	CHEMBL2500	Enzyme	0.0	0 / 4
Serine/threonine-protein kinase PLK3	PLK3	Q9H4B4	CHEMBL4897	Kinase	0.0	1 / 0
Tyrosine-protein kinase BTK	BTK	Q06187	CHEMBL5251	Kinase	0.0	1 / 0
Squalene monooxygenase (by homology)	SQLE	Q14534	CHEMBL3592	Enzyme	0.0	0 / 4
Dihydroorotate dehydrogenase (by homology)	DHODH	Q02127	CHEMBL1966	Oxidoreductase	0.0	5 / 0
Plasminogen activator inhibitor-1	SERPINE1	P05121	CHEMBL3475	Secreted protein	0.0	0 / 4
Induced myeloid leukemia cell differentiation protein Mcl-1	MCL1	Q07820	CHEMBL4361	Other cytosolic protein	0.0	0 / 8
Calcium-activated potassium channel subunit alpha-1	KCNMA1	Q12791	CHEMBL4304	Voltage-gated ion channel	0.0	2 / 0
Serotonin 2a (5-HT2a) receptor (by homology)	HTR2A	P28223	CHEMBL224	Family A G protein-coupled receptor	0.0	0 / 2
Receptor protein-tyrosine kinase erbB-2	ERBB2	P04626	CHEMBL1824	Kinase	0.0	2 / 0
MAP kinase p38 alpha	MAPK14	Q16539	CHEMBL260	Kinase	0.0	3 / 0
Cytochrome P450 2C9	CYP2C9	P11712	CHEMBL3397	Cytochrome P450	0.0	1 / 0
Methionine aminopeptidase 2	METAP2	P50579	CHEMBL3922	Protease	0.0	1 / 0
MAP kinase ERK2	MAPK1	P28482	CHEMBL4040	Kinase	0.0	3 / 0
Cathepsin (B and K)	CTSB	P07858	CHEMBL4072	Protease	0.0	1 / 0
Thromboxane-A synthase	TBXAS1	P24557	CHEMBL1835	Cytochrome P450	0.0	1 / 0
Tubulin beta-3 chain	TUBB3	Q13509	CHEMBL2597	Structural protein	0.0	0 / 1
P-glycoprotein 1	ABCB1	P08183	CHEMBL4302	Primary active transporter	0.0	0 / 7
Monoamine oxidase B	MAOB	P27338	CHEMBL2039	Oxidoreductase	0.0	0 / 31
Acyl coenzyme A:cholesterol acyltransferase	CES1	P23141	CHEMBL2265	Enzyme	0.0	0 / 4
Carboxylesterase 2	CES2	O00748	CHEMBL3180	Enzyme	0.0	0 / 4
Egl nine homolog 1	EGLN1	Q9GZT9	CHEMBL5697	Oxidoreductase	0.0	1 / 0
Estrogen receptor alpha	ESR1	P03372	CHEMBL206	Nuclear receptor	0.0	0 / 7
Estrogen receptor beta	ESR2	Q92731	CHEMBL242	Nuclear receptor	0.0	0 / 5
Poly [ADP-ribose] polymerase-1	PARP1	P09874	CHEMBL3105	Enzyme	0.0	0 / 1
Ribonuclease H1	RNASEH1	O60930	CHEMBL5893	Enzyme	0.0	1 / 0
ATP-binding cassette sub-family G member 2	ABCG2	Q9UNQ0	CHEMBL5393	Primary active transporter	0.0	0 / 16
Adenosine A3 receptor	ADORA3	P0DMS8	CHEMBL256	Family A G protein-coupled receptor	0.0	1 / 0
MAP kinase ERK1	MAPK3	P27361	CHEMBL3385	Kinase	0.0	1 / 0
Apoptosis regulator Bcl-2	BCL2	P10415	CHEMBL4860	Other ion channel	0.0	0 / 5
Leukocyte elastase	ELANE	P08246	CHEMBL248	Protease	0.0	0 / 12
Melatonin receptor 1A	MTNR1A	P48039	CHEMBL1945	Family A G protein-coupled receptor	0.0	0 / 1
Fatty acid synthase	FASN	P49327	CHEMBL4158	Transferase	0.0	0 / 1
Cytochrome P450 1B1	CYP1B1	Q16678	CHEMBL4878	Cytochrome P450	0.0	0 / 16
Dual specificity mitogen-activated protein kinase kinase 1	MAP2K1	Q02750	CHEMBL3587	Kinase	0.0	5 / 0
Solute carrier family 22 member 12	SLC22A12	Q96S37	CHEMBL6120	Electrochemical transporter	0.0	1 / 0
Thrombin	F2	P00734	CHEMBL204	Protease	0.0	2 / 2
Androgen Receptor	AR	P10275	CHEMBL1871	Nuclear receptor	0.0	0 / 6
Aryl hydrocarbon receptor	AHR	P35869	CHEMBL3201	Transcription factor	0.0	0 / 2
Insulin-like growth factor I receptor	IGF1R	P08069	CHEMBL1957	Kinase	0.0	0 / 1
ALK tyrosine kinase receptor	ALK	Q9UM73	CHEMBL4247	Kinase	0.0	0 / 1
Bcl2-antagonist of cell death (BAD)	BAD	Q92934	CHEMBL3817	Other cytosolic protein	0.0	0 / 1
Proteasome Macropain subunit MB1	PSMB5	P28074	CHEMBL4662	Protease	0.0	0 / 1
Calmodulin	CALM1	P62158	CHEMBL6093	Unclassified protein	0.0	0 / 1
Cannabinoid receptor 1	CNR1	P21554	CHEMBL218	Family A G protein-coupled receptor	0.0	0 / 4
Cannabinoid receptor 2	CNR2	P34972	CHEMBL253	Family A G protein-coupled receptor	0.0	0 / 5
Cytochrome P450 19A1	CYP19A1	P11511	CHEMBL1978	Cytochrome P450	0.0	0 / 6
Steroid 5-alpha-reductase 2	SRD5A2	P31213	CHEMBL1856	Oxidoreductase	0.0	0 / 4
Aldehyde dehydrogenase 1A1	ALDH1A1	P00352	CHEMBL3577	Enzyme	0.0	0 / 1
Equilibrative nucleoside transporter 1	SLC29A1	Q99808	CHEMBL1997	Electrochemical transporter	0.0	0 / 7
Metabotropic glutamate receptor 2 (by homology)	GRM2	Q14416	CHEMBL5137	Family C G protein-coupled receptor	0.0	0 / 11
Cathepsin D	CTSD	P07339	CHEMBL2581	Protease	0.0	0 / 1
Melanin-concentrating hormone receptor 1	MCHR1	Q99705	CHEMBL344	Family A G protein-coupled receptor	0.0	0 / 11
Aldose reductase	AKR1B1	P15121	CHEMBL1900	Enzyme	0.0	0 / 4
Dual-specificity tyrosine-phosphorylation regulated kinase 1A	DYRK1A	Q13627	CHEMBL2292	Kinase	0.0	0 / 1
Phosphodiesterase 4D	PDE4D	Q08499	CHEMBL288	Phosphodiesterase	0.0	0 / 4
Serum albumin	ALB	P02768	CHEMBL3253	Secreted protein	0.0	0 / 1
Steryl-sulfatase	STS	P08842	CHEMBL3559	Enzyme	0.0	0 / 4
Dual specificty protein kinase CLK1	CLK1	P49759	CHEMBL4224	Kinase	0.0	0 / 1
Dual specificity tyrosine-phosphorylation-regulated kinase 1B	DYRK1B	Q9Y463	CHEMBL5543	Kinase	0.0	0 / 1
Monoamine oxidase A	MAOA	P21397	CHEMBL1951	Oxidoreductase	0.0	0 / 7
Cytochrome P450 1A1	CYP1A1	P04798	CHEMBL2231	Cytochrome P450	0.0	0 / 6
L-lactate dehydrogenase A chain	LDHA	P00338	CHEMBL4835	Enzyme	0.0	0 / 1
L-lactate dehydrogenase B chain	LDHB	P07195	CHEMBL4940	Enzyme	0.0	0 / 1
Beta amyloid A4 protein	APP	P05067	CHEMBL2487	Membrane receptor	0.0	0 / 3
Rho-associated protein kinase 2	ROCK2	O75116	CHEMBL2973	Kinase	0.0	0 / 1
Dopamine transporter	SLC6A3	Q01959	CHEMBL238	Electrochemical transporter	0.0	0 / 4
Tyrosine-protein kinase SYK	SYK	P43405	CHEMBL2599	Kinase	0.0	0 / 1
Serotonin transporter (by homology)	SLC6A4	P31645	CHEMBL228	Electrochemical transporter	0.0	0 / 3
