# Supplementary material for: A Network Pharmacology-Based Study on Irritable Bowel Syndrome Prevention and Treatment Utilizing Shenling Baizhu Powder
Source: Biomed Res Int. 2021 Nov 23;2021:4579850. doi: 10.1155/2021/4579850 (PMC8632384; doi:10.1155/2021/4579850)
Supplement: Supplementary Materials — Please find detailed data in the supplementary file, including the original data of SymMap, metabolomics, and molecular docking of Shenling Baizhu powder. “Shenling Baizhu powder SymMap” includes all herbal targets and combined targets. “Shenling Baizhu powder metabolomics” includes two-dimensional structural data analysis. “Molecular docking” involves molecule-target docking and the results. [file 4579850.f1.zip › Data in brief/2. Shenling Baizhu powder Metabolomics/2D structure/19.csv]

Target	Common name	Uniprot ID	ChEMBL ID	Target Class	Probability*	Known actives (3D/2D)
Acetylcholinesterase	ACHE	P22303	CHEMBL220	Hydrolase	0.276835829954	0 / 3
Nuclear factor NF-kappa-B p105 subunit	NFKB1	P19838	CHEMBL3251	Other cytosolic protein	0.276835829954	0 / 2
Carbonic anhydrase II	CA2	P00918	CHEMBL205	Lyase	0.0619149311119	0 / 6
Carbonic anhydrase VII	CA7	P43166	CHEMBL2326	Lyase	0.0619149311119	0 / 16
Carbonic anhydrase I	CA1	P00915	CHEMBL261	Lyase	0.0619149311119	0 / 14
Carbonic anhydrase III	CA3	P07451	CHEMBL2885	Lyase	0.0619149311119	0 / 5
Carbonic anhydrase VI	CA6	P23280	CHEMBL3025	Lyase	0.0619149311119	0 / 7
Carbonic anhydrase XII	CA12	O43570	CHEMBL3242	Lyase	0.0619149311119	0 / 29
Carbonic anhydrase XIV	CA14	Q9ULX7	CHEMBL3510	Lyase	0.0619149311119	0 / 13
Carbonic anhydrase IX	CA9	Q16790	CHEMBL3594	Lyase	0.0619149311119	0 / 34
Carbonic anhydrase IV	CA4	P22748	CHEMBL3729	Lyase	0.0619149311119	0 / 6
Carbonic anhydrase XIII (by homology)	CA13	Q8N1Q1	CHEMBL3912	Lyase	0.0619149311119	0 / 17
Carbonic anhydrase VB	CA5B	Q9Y2D0	CHEMBL3969	Lyase	0.0619149311119	0 / 10
Carbonic anhydrase VA	CA5A	P35218	CHEMBL4789	Lyase	0.0619149311119	0 / 10
Monoamine oxidase A	MAOA	P21397	CHEMBL1951	Oxidoreductase	0.0414702990123	0 / 15
Quinone reductase 1	NQO1	P15559	CHEMBL3623	Enzyme	0.0312265582077	0 / 1
Estrogen receptor alpha	ESR1	P03372	CHEMBL206	Nuclear receptor	0.0312265582077	0 / 20
Estrogen receptor beta	ESR2	Q92731	CHEMBL242	Nuclear receptor	0.0312265582077	0 / 29
Cytochrome P450 1A2	CYP1A2	P05177	CHEMBL3356	Cytochrome P450	0.0312265582077	0 / 5
Cytochrome P450 1B1	CYP1B1	Q16678	CHEMBL4878	Cytochrome P450	0.0312265582077	0 / 2
D-amino-acid oxidase	DAO	P14920	CHEMBL5485	Enzyme	0.0	0 / 1
Serotonin 2c (5-HT2c) receptor	HTR2C	P28335	CHEMBL225	Family A G protein-coupled receptor	0.0	0 / 1
Adenosine A2a receptor	ADORA2A	P29274	CHEMBL251	Family A G protein-coupled receptor	0.0	0 / 1
Xanthine dehydrogenase	XDH	P47989	CHEMBL1929	Oxidoreductase	0.0	0 / 1
Epidermal growth factor receptor erbB1	EGFR	P00533	CHEMBL203	Kinase	0.0	0 / 2
Arachidonate 5-lipoxygenase	ALOX5	P09917	CHEMBL215	Oxidoreductase	0.0	0 / 1
Carbonyl reductase [NADPH] 1	CBR1	P16152	CHEMBL5586	Enzyme	0.0	0 / 1
Estradiol 17-beta-dehydrogenase 3	HSD17B3	P37058	CHEMBL4234	Enzyme	0.0	0 / 6
Voltage-gated potassium channel subunit Kv1.5	KCNA5	P22460	CHEMBL4306	Voltage-gated ion channel	0.0	0 / 1
Voltage-gated potassium channel subunit Kv1.3	KCNA3	P22001	CHEMBL4633	Voltage-gated ion channel	0.0	0 / 4
Leukocyte elastase	ELANE	P08246	CHEMBL248	Protease	0.0	0 / 1
Lysosomal protective protein	CTSA	P10619	CHEMBL6115	Protease	0.0	0 / 1
G-protein coupled receptor 35	GPR35	Q9HC97	CHEMBL1293267	Family A G protein-coupled receptor	0.0	0 / 1
Receptor protein-tyrosine kinase erbB-2	ERBB2	P04626	CHEMBL1824	Kinase	0.0	0 / 1
Aldose reductase	AKR1B1	P15121	CHEMBL1900	Enzyme	0.0	0 / 5
Cyclin-dependent kinase 4/cyclin D1	CCND1 CDK4	P24385 P11802	CHEMBL1907601	Kinase	0.0	0 / 1
Platelet-derived growth factor receptor beta	PDGFRB	P09619	CHEMBL1913	Kinase	0.0	0 / 1
Vascular endothelial growth factor receptor 3	FLT4	P35916	CHEMBL1955	Kinase	0.0	0 / 1
Insulin-like growth factor I receptor	IGF1R	P08069	CHEMBL1957	Kinase	0.0	0 / 1
Insulin receptor	INSR	P06213	CHEMBL1981	Kinase	0.0	0 / 1
Cyclin-dependent kinase 2/cyclin A	CDK2 CCNA1 CCNA2	P24941 P78396 P20248	CHEMBL2094128	Other cytosolic protein	0.0	0 / 1
Serine/threonine-protein kinase Aurora-B	AURKB	Q96GD4	CHEMBL2185	Kinase	0.0	0 / 1
Glycogen synthase kinase-3 beta	GSK3B	P49841	CHEMBL262	Kinase	0.0	0 / 1
Tyrosine-protein kinase SRC	SRC	P12931	CHEMBL267	Kinase	0.0	0 / 1
Focal adhesion kinase 1	PTK2	Q05397	CHEMBL2695	Kinase	0.0	0 / 1
Vascular endothelial growth factor receptor 2	KDR	P35968	CHEMBL279	Kinase	0.0	0 / 1
Serine/threonine-protein kinase PLK1	PLK1	P53350	CHEMBL3024	Kinase	0.0	0 / 1
Casein kinase II alpha	CSNK2A1	P68400	CHEMBL3629	Kinase	0.0	0 / 1
Hepatocyte growth factor receptor	MET	P08581	CHEMBL3717	Kinase	0.0	0 / 1
Serine/threonine-protein kinase PLK4	PLK4	O00444	CHEMBL3788	Kinase	0.0	0 / 1
Tyrosine-protein kinase TIE-2	TEK	Q02763	CHEMBL4128	Kinase	0.0	0 / 1
Serine/threonine-protein kinase AKT	AKT1	P31749	CHEMBL4282	Kinase	0.0	0 / 1
Serine/threonine-protein kinase Aurora-A	AURKA	O14965	CHEMBL4722	Kinase	0.0	0 / 1
Beta-secretase 1	BACE1	P56817	CHEMBL4822	Protease	0.0	0 / 2
Mitogen-activated protein kinase kinase kinase 8	MAP3K8	P41279	CHEMBL4899	Kinase	0.0	0 / 1
Serine/threonine-protein kinase B-raf	BRAF	P15056	CHEMBL5145	Kinase	0.0	0 / 1
Ephrin receptor	EPHB4	P54760	CHEMBL5147	Kinase	0.0	0 / 1
Heat shock 70 kDa protein 1	HSPA1A	P0DMV8	CHEMBL5460	Other cytosolic protein	0.0	0 / 1
NUAK family SNF1-like kinase 1	NUAK1	O60285	CHEMBL5784	Kinase	0.0	0 / 1
Squalene monooxygenase (by homology)	SQLE	Q14534	CHEMBL3592	Enzyme	0.0	0 / 1
Tyrosine-protein kinase FGR (by homology)	FGR	P09769	CHEMBL4454	Kinase	0.0	0 / 1
Tyrosine-protein kinase Lyn (by homology)	LYN	P07948	CHEMBL3905	Kinase	0.0	0 / 1
Dopamine D4 receptor	DRD4	P21917	CHEMBL219	Family A G protein-coupled receptor	0.0	0 / 2
Glutathione reductase	GSR	P00390	CHEMBL2755	Oxidoreductase	0.0	0 / 1
Monoamine oxidase B	MAOB	P27338	CHEMBL2039	Oxidoreductase	0.0	0 / 7
G-protein coupled receptor 55	GPR55	Q9Y2T6	CHEMBL1075322	Family A G protein-coupled receptor	0.0	0 / 2
Steroid 5-alpha-reductase 1	SRD5A1	P18405	CHEMBL1787	Oxidoreductase	0.0	0 / 2
Cannabinoid receptor 1 (by homology)	CNR1	P21554	CHEMBL218	Family A G protein-coupled receptor	0.0	0 / 1
Cyclooxygenase-2	PTGS2	P35354	CHEMBL230	Oxidoreductase	0.0	0 / 1
Aldo-keto-reductase family 1 member C3	AKR1C3	P42330	CHEMBL4681	Enzyme	0.0	0 / 1
Exportin-1	XPO1	O14980	CHEMBL5661	Unclassified protein	0.0	0 / 1
Aldo-keto reductase family 1 member C1	AKR1C1	Q04828	CHEMBL5905	Enzyme	0.0	0 / 1
Aldehyde dehydrogenase	ALDH2	P05091	CHEMBL1935	Oxidoreductase	0.0	0 / 1
Thromboxane A2 receptor	TBXA2R	P21731	CHEMBL2069	Family A G protein-coupled receptor	0.0	0 / 2
Macrophage migration inhibitory factor	MIF	P14174	CHEMBL2085	Enzyme	0.0	0 / 1
Toll-like receptor (TLR7/TLR9)	TLR9	Q9NR96	CHEMBL5804	Toll-like and Il-1 receptors	0.0	0 / 1
