# Supplementary material for: A Network Pharmacology-Based Study on Irritable Bowel Syndrome Prevention and Treatment Utilizing Shenling Baizhu Powder
Source: Biomed Res Int. 2021 Nov 23;2021:4579850. doi: 10.1155/2021/4579850 (PMC8632384; doi:10.1155/2021/4579850)
Supplement: Supplementary Materials — Please find detailed data in the supplementary file, including the original data of SymMap, metabolomics, and molecular docking of Shenling Baizhu powder. “Shenling Baizhu powder SymMap” includes all herbal targets and combined targets. “Shenling Baizhu powder metabolomics” includes two-dimensional structural data analysis. “Molecular docking” involves molecule-target docking and the results. [file 4579850.f1.zip › Data in brief/2. Shenling Baizhu powder Metabolomics/2D structure/21.csv]

Target	Common name	Uniprot ID	ChEMBL ID	Target Class	Probability*	Known actives (3D/2D)
Carbonic anhydrase VI	CA6	P23280	CHEMBL3025	Lyase	0.0414702990123	0 / 11
Carbonic anhydrase XII	CA12	O43570	CHEMBL3242	Lyase	0.0414702990123	0 / 32
Carbonic anhydrase XIV	CA14	Q9ULX7	CHEMBL3510	Lyase	0.0414702990123	0 / 20
Carbonic anhydrase IX	CA9	Q16790	CHEMBL3594	Lyase	0.0414702990123	0 / 39
Carbonic anhydrase IV	CA4	P22748	CHEMBL3729	Lyase	0.0414702990123	0 / 10
Carbonic anhydrase XIII (by homology)	CA13	Q8N1Q1	CHEMBL3912	Lyase	0.0414702990123	0 / 22
Carbonic anhydrase VB	CA5B	Q9Y2D0	CHEMBL3969	Lyase	0.0414702990123	0 / 13
Carbonic anhydrase VA	CA5A	P35218	CHEMBL4789	Lyase	0.0414702990123	0 / 13
Monoamine oxidase B	MAOB	P27338	CHEMBL2039	Oxidoreductase	0.0312265582077	0 / 95
Estradiol 17-beta-dehydrogenase 3	HSD17B3	P37058	CHEMBL4234	Enzyme	0.0312265582077	0 / 14
G-protein coupled receptor 55	GPR55	Q9Y2T6	CHEMBL1075322	Family A G protein-coupled receptor	0.0	0 / 11
Estrogen receptor alpha	ESR1	P03372	CHEMBL206	Nuclear receptor	0.0	0 / 32
Estrogen receptor beta	ESR2	Q92731	CHEMBL242	Nuclear receptor	0.0	0 / 43
Monoamine oxidase A	MAOA	P21397	CHEMBL1951	Oxidoreductase	0.0	0 / 30
Carbonic anhydrase VII	CA7	P43166	CHEMBL2326	Lyase	0.0	0 / 15
Carbonic anhydrase III	CA3	P07451	CHEMBL2885	Lyase	0.0	0 / 8
Cytochrome P450 1A2	CYP1A2	P05177	CHEMBL3356	Cytochrome P450	0.0	0 / 4
Cytochrome P450 1B1	CYP1B1	Q16678	CHEMBL4878	Cytochrome P450	0.0	0 / 2
Carbonic anhydrase I	CA1	P00915	CHEMBL261	Lyase	0.0	0 / 16
Carbonic anhydrase II	CA2	P00918	CHEMBL205	Lyase	0.0	0 / 10
Androgen Receptor	AR	P10275	CHEMBL1871	Nuclear receptor	0.0	0 / 2
Serotonin 2c (5-HT2c) receptor	HTR2C	P28335	CHEMBL225	Family A G protein-coupled receptor	0.0	0 / 1
Adenosine A2a receptor	ADORA2A	P29274	CHEMBL251	Family A G protein-coupled receptor	0.0	0 / 1
Acetylcholinesterase	ACHE	P22303	CHEMBL220	Hydrolase	0.0	0 / 14
Macrophage migration inhibitory factor	MIF	P14174	CHEMBL2085	Enzyme	0.0	0 / 6
Butyrylcholinesterase	BCHE	P06276	CHEMBL1914	Hydrolase	0.0	0 / 4
Cannabinoid receptor 1 (by homology)	CNR1	P21554	CHEMBL218	Family A G protein-coupled receptor	0.0	0 / 11
Cannabinoid receptor 2	CNR2	P34972	CHEMBL253	Family A G protein-coupled receptor	0.0	0 / 16
Aldose reductase (by homology)	AKR1B1	P15121	CHEMBL1900	Enzyme	0.0	0 / 14
Aldehyde dehydrogenase	ALDH2	P05091	CHEMBL1935	Oxidoreductase	0.0	0 / 1
Serine/threonine-protein kinase/endoribonuclease IRE1	ERN1	O75460	CHEMBL1163101	Enzyme	0.0	0 / 1
Monocarboxylate transporter 4	SLC16A3	O15427	CHEMBL2073663	Electrochemical transporter	0.0	0 / 5
Serotonin 2b (5-HT2b) receptor	HTR2B	P41595	CHEMBL1833	Family A G protein-coupled receptor	0.0	0 / 1
D-amino-acid oxidase	DAO	P14920	CHEMBL5485	Enzyme	0.0	0 / 1
Dopamine D4 receptor	DRD4	P21917	CHEMBL219	Family A G protein-coupled receptor	0.0	0 / 2
Quinone reductase 1	NQO1	P15559	CHEMBL3623	Enzyme	0.0	0 / 7
Steroid 5-alpha-reductase 1	SRD5A1	P18405	CHEMBL1787	Oxidoreductase	0.0	0 / 1
11-beta-hydroxysteroid dehydrogenase 1	HSD11B1	P28845	CHEMBL4235	Enzyme	0.0	0 / 4
Toll-like receptor (TLR7/TLR9)	TLR9	Q9NR96	CHEMBL5804	Toll-like and Il-1 receptors	0.0	0 / 1
Cytochrome P450 19A1	CYP19A1	P11511	CHEMBL1978	Cytochrome P450	0.0	0 / 4
Epidermal growth factor receptor erbB1	EGFR	P00533	CHEMBL203	Kinase	0.0	0 / 2
Xanthine dehydrogenase	XDH	P47989	CHEMBL1929	Oxidoreductase	0.0	0 / 1
Testis-specific androgen-binding protein	SHBG	P04278	CHEMBL3305	Secreted protein	0.0	0 / 1
Tankyrase-1	TNKS	O95271	CHEMBL6164	Enzyme	0.0	0 / 3
Tyrosine-protein kinase FYN	FYN	P06241	CHEMBL1841	Kinase	0.0	0 / 1
Tyrosine-protein kinase LCK	LCK	P06239	CHEMBL258	Kinase	0.0	0 / 2
Serine/threonine-protein kinase PIM1	PIM1	P11309	CHEMBL2147	Kinase	0.0	0 / 2
Serine/threonine-protein kinase Aurora-B	AURKB	Q96GD4	CHEMBL2185	Kinase	0.0	0 / 3
G protein-coupled receptor kinase 6	GRK6	P43250	CHEMBL6144	Kinase	0.0	0 / 1
Adenosine A3 receptor	ADORA3	P0DMS8	CHEMBL256	Family A G protein-coupled receptor	0.0	0 / 1
Adenosine A1 receptor (by homology)	ADORA1	P30542	CHEMBL226	Family A G protein-coupled receptor	0.0	0 / 1
Nuclear factor NF-kappa-B p105 subunit	NFKB1	P19838	CHEMBL3251	Other cytosolic protein	0.0	0 / 2
G protein-coupled receptor 44	PTGDR2	Q9Y5Y4	CHEMBL5071	Family A G protein-coupled receptor	0.0	0 / 1
Prostanoid EP1 receptor	PTGER1	P34995	CHEMBL1811	Family A G protein-coupled receptor	0.0	0 / 1
Prostanoid EP2 receptor	PTGER2	P43116	CHEMBL1881	Family A G protein-coupled receptor	0.0	0 / 1
Steryl-sulfatase	STS	P08842	CHEMBL3559	Enzyme	0.0	0 / 3
Prostanoid EP3 receptor	PTGER3	P43115	CHEMBL3710	Family A G protein-coupled receptor	0.0	0 / 1
Prostanoid DP receptor	PTGDR	Q13258	CHEMBL4427	Family A G protein-coupled receptor	0.0	0 / 1
Arachidonate 5-lipoxygenase	ALOX5	P09917	CHEMBL215	Oxidoreductase	0.0	0 / 1
Thrombin	F2	P00734	CHEMBL204	Protease	0.0	0 / 1
Heat shock protein HSP 90-alpha	HSP90AA1	P07900	CHEMBL3880	Other cytosolic protein	0.0	0 / 1
Thromboxane A2 receptor	TBXA2R	P21731	CHEMBL2069	Family A G protein-coupled receptor	0.0	0 / 2
Insulin-like growth factor I receptor	IGF1R	P08069	CHEMBL1957	Kinase	0.0	0 / 2
Vascular endothelial growth factor receptor 2	KDR	P35968	CHEMBL279	Kinase	0.0	0 / 2
Serine/threonine-protein kinase PLK1	PLK1	P53350	CHEMBL3024	Kinase	0.0	0 / 2
Hepatocyte growth factor receptor	MET	P08581	CHEMBL3717	Kinase	0.0	0 / 2
ALK tyrosine kinase receptor	ALK	Q9UM73	CHEMBL4247	Kinase	0.0	0 / 1
Tyrosine-protein kinase receptor UFO	AXL	P30530	CHEMBL4895	Kinase	0.0	0 / 1
G-protein coupled receptor 35	GPR35	Q9HC97	CHEMBL1293267	Family A G protein-coupled receptor	0.0	0 / 1
Receptor protein-tyrosine kinase erbB-2	ERBB2	P04626	CHEMBL1824	Kinase	0.0	0 / 1
Cyclin-dependent kinase 4/cyclin D1	CCND1 CDK4	P24385 P11802	CHEMBL1907601	Kinase	0.0	0 / 1
Platelet-derived growth factor receptor beta	PDGFRB	P09619	CHEMBL1913	Kinase	0.0	0 / 1
Vascular endothelial growth factor receptor 3	FLT4	P35916	CHEMBL1955	Kinase	0.0	0 / 1
Insulin receptor	INSR	P06213	CHEMBL1981	Kinase	0.0	0 / 1
Cyclin-dependent kinase 2/cyclin A	CDK2 CCNA1 CCNA2	P24941 P78396 P20248	CHEMBL2094128	Other cytosolic protein	0.0	0 / 1
Glycogen synthase kinase-3 beta	GSK3B	P49841	CHEMBL262	Kinase	0.0	0 / 1
Tyrosine-protein kinase SRC	SRC	P12931	CHEMBL267	Kinase	0.0	0 / 1
Focal adhesion kinase 1	PTK2	Q05397	CHEMBL2695	Kinase	0.0	0 / 1
Casein kinase II alpha	CSNK2A1	P68400	CHEMBL3629	Kinase	0.0	0 / 1
Serine/threonine-protein kinase PLK4	PLK4	O00444	CHEMBL3788	Kinase	0.0	0 / 1
Tyrosine-protein kinase TIE-2	TEK	Q02763	CHEMBL4128	Kinase	0.0	0 / 1
Serine/threonine-protein kinase AKT	AKT1	P31749	CHEMBL4282	Kinase	0.0	0 / 1
Serine/threonine-protein kinase Aurora-A	AURKA	O14965	CHEMBL4722	Kinase	0.0	0 / 1
Beta-secretase 1	BACE1	P56817	CHEMBL4822	Protease	0.0	0 / 1
Mitogen-activated protein kinase kinase kinase 8	MAP3K8	P41279	CHEMBL4899	Kinase	0.0	0 / 1
Serine/threonine-protein kinase B-raf	BRAF	P15056	CHEMBL5145	Kinase	0.0	0 / 1
Ephrin receptor	EPHB4	P54760	CHEMBL5147	Kinase	0.0	0 / 1
Heat shock 70 kDa protein 1	HSPA1A	P0DMV8	CHEMBL5460	Other cytosolic protein	0.0	0 / 1
NUAK family SNF1-like kinase 1	NUAK1	O60285	CHEMBL5784	Kinase	0.0	0 / 1
Squalene monooxygenase (by homology)	SQLE	Q14534	CHEMBL3592	Enzyme	0.0	0 / 1
Tyrosine-protein kinase FGR (by homology)	FGR	P09769	CHEMBL4454	Kinase	0.0	0 / 1
Tyrosine-protein kinase Lyn (by homology)	LYN	P07948	CHEMBL3905	Kinase	0.0	0 / 1
Serotonin 2a (5-HT2a) receptor (by homology)	HTR2A	P28223	CHEMBL224	Family A G protein-coupled receptor	0.0	0 / 1
Serum paraoxonase/arylesterase 1	PON1	P27169	CHEMBL3167	Enzyme	0.0	0 / 1
Metabotropic glutamate receptor 5	GRM5	P41594	CHEMBL3227	Family C G protein-coupled receptor	0.0	0 / 1
Protein-tyrosine phosphatase 1B	PTPN1	P18031	CHEMBL335	Phosphatase	0.0	0 / 1
T-cell protein-tyrosine phosphatase	PTPN2	P17706	CHEMBL3807	Phosphatase	0.0	0 / 1
Cytochrome P450 11B1	CYP11B1	P15538	CHEMBL1908	Cytochrome P450	0.0	0 / 1
Cytochrome P450 11B2	CYP11B2	P19099	CHEMBL2722	Cytochrome P450	0.0	0 / 1
Exportin-1	XPO1	O14980	CHEMBL5661	Unclassified protein	0.0	0 / 1
