# Supplementary material for: A Network Pharmacology-Based Study on Irritable Bowel Syndrome Prevention and Treatment Utilizing Shenling Baizhu Powder
Source: Biomed Res Int. 2021 Nov 23;2021:4579850. doi: 10.1155/2021/4579850 (PMC8632384; doi:10.1155/2021/4579850)
Supplement: Supplementary Materials — Please find detailed data in the supplementary file, including the original data of SymMap, metabolomics, and molecular docking of Shenling Baizhu powder. “Shenling Baizhu powder SymMap” includes all herbal targets and combined targets. “Shenling Baizhu powder metabolomics” includes two-dimensional structural data analysis. “Molecular docking” involves molecule-target docking and the results. [file 4579850.f1.zip › Data in brief/2. Shenling Baizhu powder Metabolomics/2D structure/22.csv]

Target	Common name	Uniprot ID	ChEMBL ID	Target Class	Probability*	Known actives (3D/2D)
Nuclear receptor ROR-gamma	RORC	P51449	CHEMBL1741186	Nuclear receptor	0.080569968052	0 / 9
Niemann-Pick C1-like protein 1	NPC1L1	Q9UHC9	CHEMBL2027	Other membrane protein	0.080569968052	0 / 8
Nuclear receptor ROR-alpha	RORA	P35398	CHEMBL5868	Nuclear receptor	0.080569968052	0 / 3
Dipeptidyl peptidase IV	DPP4	P27487	CHEMBL284	Protease	0.080569968052	2 / 0
Serotonin transporter (by homology)	SLC6A4	P31645	CHEMBL228	Electrochemical transporter	0.080569968052	0 / 2
Prostanoid EP1 receptor	PTGER1	P34995	CHEMBL1811	Family A G protein-coupled receptor	0.0717871625222	0 / 8
Prostanoid EP4 receptor	PTGER4	P35408	CHEMBL1836	Family A G protein-coupled receptor	0.0717871625222	0 / 6
Prostanoid FP receptor	PTGFR	P43088	CHEMBL1987	Family A G protein-coupled receptor	0.0717871625222	0 / 11
Prostanoid EP3 receptor	PTGER3	P43115	CHEMBL3710	Family A G protein-coupled receptor	0.0717871625222	0 / 3
Prostanoid DP receptor	PTGDR	Q13258	CHEMBL4427	Family A G protein-coupled receptor	0.0717871625222	0 / 1
LXR-alpha	NR1H3	Q13133	CHEMBL2808	Nuclear receptor	0.0717871625222	0 / 18
Androgen Receptor (by homology)	AR	P10275	CHEMBL1871	Nuclear receptor	0.0717871625222	0 / 56
Estrogen receptor alpha	ESR1	P03372	CHEMBL206	Nuclear receptor	0.0717871625222	0 / 35
Peroxisome proliferator-activated receptor gamma	PPARG	P37231	CHEMBL235	Nuclear receptor	0.0717871625222	0 / 9
Peroxisome proliferator-activated receptor alpha	PPARA	Q07869	CHEMBL239	Nuclear receptor	0.0717871625222	0 / 8
Testis-specific androgen-binding protein	SHBG	P04278	CHEMBL3305	Secreted protein	0.0717871625222	0 / 30
Peroxisome proliferator-activated receptor delta	PPARD	Q03181	CHEMBL3979	Nuclear receptor	0.0717871625222	0 / 6
Cytidine deaminase (by homology)	CDA	P32320	CHEMBL4502	Enzyme	0.0717871625222	25 / 0
Sterol regulatory element-binding protein 2	SREBF2	Q12772	CHEMBL1795166	Unclassified protein	0.0	0 / 1
Cytochrome P450 17A1	CYP17A1	P05093	CHEMBL3522	Cytochrome P450	0.0	0 / 33
HMG-CoA reductase	HMGCR	P04035	CHEMBL402	Oxidoreductase	0.0	0 / 4
Cytochrome P450 51 (by homology)	CYP51A1	Q16850	CHEMBL3849	Cytochrome P450	0.0	0 / 2
Nuclear receptor subfamily 1 group I member 3 (by homology)	NR1I3	Q14994	CHEMBL5503	Nuclear receptor	0.0	0 / 1
Protein kinase C alpha	PRKCA	P17252	CHEMBL299	Kinase	0.0	0 / 1
Glutamate carboxypeptidase II	FOLH1	Q04609	CHEMBL1892	Protease	0.0	15 / 0
Prostanoid EP2 receptor (by homology)	PTGER2	P43116	CHEMBL1881	Family A G protein-coupled receptor	0.0	0 / 17
Prostanoid IP receptor	PTGIR	P43119	CHEMBL1995	Family A G protein-coupled receptor	0.0	0 / 6
Adenosine deaminase (by homology)	ADA	P00813	CHEMBL1910	Hydrolase	0.0	7 / 0
Adenosine A2a receptor (by homology)	ADORA2A	P29274	CHEMBL251	Family A G protein-coupled receptor	0.0	16 / 0
Adenosylhomocysteinase	AHCY	P23526	CHEMBL2664	Enzyme	0.0	43 / 0
Adenosine A1 receptor (by homology)	ADORA1	P30542	CHEMBL226	Family A G protein-coupled receptor	0.0	19 / 0
Leukotriene B4 receptor 1	LTB4R	Q15722	CHEMBL3911	Family A G protein-coupled receptor	0.0	0 / 3
Thymidine kinase, cytosolic	TK1	P04183	CHEMBL2883	Transferase	0.0	10 / 0
CDK9/cyclin T1	CDK9 CCNT1	P50750 O60563	CHEMBL2111389	Other cytosolic protein	0.0	1 / 0
Casein kinase II alpha	CSNK2A1	P68400	CHEMBL3629	Kinase	0.0	2 / 0
Alpha-L-fucosidase I	FUCA1	P04066	CHEMBL4176	Enzyme	0.0	22 / 0
Vitamin D receptor	VDR	P11473	CHEMBL1977	Nuclear receptor	0.0	0 / 39
Beta-glucocerebrosidase	GBA	P04062	CHEMBL2179	Enzyme	0.0	11 / 0
Hydroxycarboxylic acid receptor 2	HCAR2	Q8TDS4	CHEMBL3785	Family A G protein-coupled receptor	0.0	23 / 0
Sphingosine kinase 2	SPHK2	Q9NRA0	CHEMBL3023	Enzyme	0.0	0 / 1
Sphingosine kinase 1	SPHK1	Q9NYA1	CHEMBL4394	Enzyme	0.0	0 / 2
Thymidylate synthase (by homology)	TYMS	P04818	CHEMBL1952	Transferase	0.0	2 / 0
Solute carrier family 22 member 6 (by homology)	SLC22A6	Q4U2R8	CHEMBL1641347	Electrochemical transporter	0.0	0 / 1
Adenosine kinase	ADK	P55263	CHEMBL3589	Enzyme	0.0	20 / 0
Heat shock protein HSP 90-alpha	HSP90AA1	P07900	CHEMBL3880	Other cytosolic protein	0.0	1 / 0
Aldo-keto-reductase family 1 member C3	AKR1C3	P42330	CHEMBL4681	Enzyme	0.0	7 / 0
Aldo-keto reductase family 1 member C2	AKR1C2	P52895	CHEMBL5847	Enzyme	0.0	6 / 0
Lysine-specific demethylase 4C	KDM4C	Q9H3R0	CHEMBL6175	Eraser	0.0	4 / 0
Protein-tyrosine phosphatase 1B	PTPN1	P18031	CHEMBL335	Phosphatase	0.0	6 / 37
Fructose-1,6-bisphosphatase	FBP1	P09467	CHEMBL3975	Enzyme	0.0	17 / 0
Epoxide hydrolase 1 (by homology)	EPHX1	P07099	CHEMBL1968	Protease	0.0	2 / 0
Carbonic anhydrase II	CA2	P00918	CHEMBL205	Lyase	0.0	19 / 0
Muscle glycogen phosphorylase	PYGM	P11217	CHEMBL3526	Enzyme	0.0	1 / 0
Adenosylhomocysteinase 2	AHCYL1	O43865	CHEMBL3751646	Enzyme	0.0	3 / 0
Carbonic anhydrase I	CA1	P00915	CHEMBL261	Lyase	0.0	19 / 0
D-amino-acid oxidase	DAO	P14920	CHEMBL5485	Enzyme	0.0	11 / 0
Cytochrome P450 19A1	CYP19A1	P11511	CHEMBL1978	Cytochrome P450	0.0	1 / 57
Lysine-specific demethylase 4D-like	KDM4E	B2RXH2	CHEMBL1293226	Eraser	0.0	4 / 0
Alkaline phosphatase, tissue-nonspecific isozyme	ALPL	P05186	CHEMBL5979	Enzyme	0.0	4 / 0
Protein farnesyltransferase	FNTA FNTB	P49354 P49356	CHEMBL2094108	Enzyme	0.0	0 / 5
Carbonic anhydrase XII	CA12	O43570	CHEMBL3242	Lyase	0.0	10 / 0
Carbonic anhydrase IX	CA9	Q16790	CHEMBL3594	Lyase	0.0	11 / 0
Hydroxyacid oxidase 2 (by homology)	HAO2	Q9NYQ3	CHEMBL2169732	Enzyme	0.0	6 / 0
Muscarinic acetylcholine receptor M2	CHRM2	P08172	CHEMBL211	Family A G protein-coupled receptor	0.0	0 / 1
Acetylcholinesterase	ACHE	P22303	CHEMBL220	Hydrolase	0.0	0 / 1
Norepinephrine transporter	SLC6A2	P23975	CHEMBL222	Electrochemical transporter	0.0	0 / 2
Squalene monooxygenase	SQLE	Q14534	CHEMBL3592	Enzyme	0.0	0 / 4
Cytochrome P450 2C19	CYP2C19	P33261	CHEMBL3622	Cytochrome P450	0.0	0 / 1
Uracil nucleotide/cysteinyl leukotriene receptor	GPR17	Q13304	CHEMBL1075162	Family A G protein-coupled receptor	0.0	2 / 0
Tyrosyl-DNA phosphodiesterase 1	TDP1	Q9NUW8	CHEMBL1075138	Enzyme	0.0	1 / 0
Liver glycogen phosphorylase	PYGL	P06737	CHEMBL2568	Enzyme	0.0	9 / 0
DNA-(apurinic or apyrimidinic site) lyase	APEX1	P27695	CHEMBL5619	Enzyme	0.0	2 / 0
Butyrylcholinesterase	BCHE	P06276	CHEMBL1914	Hydrolase	0.0	0 / 1
Glycine receptor subunit alpha-2	GLRA2	P23416	CHEMBL5871	Ligand-gated ion channel	0.0	1 / 0
Bifunctional protein NCOAT	OGA	O60502	CHEMBL5921	Enzyme	0.0	5 / 0
TNF-alpha	TNF	P01375	CHEMBL1825	Secreted protein	0.0	0 / 5
11-beta-hydroxysteroid dehydrogenase 1	HSD11B1	P28845	CHEMBL4235	Enzyme	0.0	0 / 12
Carboxypeptidase A1	CPA1	P15085	CHEMBL2088	Protease	0.0	6 / 0
Poly [ADP-ribose] polymerase-1	PARP1	P09874	CHEMBL3105	Enzyme	0.0	2 / 0
Heat shock 70 kDa protein 1	HSPA1A	P0DMV8	CHEMBL5460	Other cytosolic protein	0.0	3 / 0
Lysine-specific demethylase 3A	KDM3A	Q9Y4C1	CHEMBL1938209	Eraser	0.0	1 / 0
Lysine-specific demethylase 6B	KDM6B	O15054	CHEMBL1938211	Eraser	0.0	1 / 0
Alpha-ketoglutarate-dependent dioxygenase FTO	FTO	Q9C0B1	CHEMBL2331065	Oxidoreductase	0.0	1 / 0
Glutathione reductase	GSR	P00390	CHEMBL2755	Oxidoreductase	0.0	3 / 0
Glutathione S-transferase Pi	GSTP1	P09211	CHEMBL3902	Enzyme	0.0	1 / 0
Glutathione S-transferase Mu 2	GSTM2	P28161	CHEMBL4589	Enzyme	0.0	1 / 0
Lysine-specific demethylase 4A	KDM4A	O75164	CHEMBL5896	Eraser	0.0	5 / 0
Thrombin	F2	P00734	CHEMBL204	Protease	0.0	3 / 0
Carbonic anhydrase VII	CA7	P43166	CHEMBL2326	Lyase	0.0	1 / 0
Carbonic anhydrase VI	CA6	P23280	CHEMBL3025	Lyase	0.0	1 / 0
Carbonic anhydrase XIV	CA14	Q9ULX7	CHEMBL3510	Lyase	0.0	3 / 0
Carbonic anhydrase VB	CA5B	Q9Y2D0	CHEMBL3969	Lyase	0.0	1 / 0
Carbonic anhydrase VA	CA5A	P35218	CHEMBL4789	Lyase	0.0	1 / 0
Corticosteroid binding globulin	SERPINA6	P08185	CHEMBL2421	Secreted protein	0.0	0 / 11
Carboxylesterase 2	CES2	O00748	CHEMBL3180	Enzyme	0.0	0 / 4
Glucose-6-phosphate 1-dehydrogenase	G6PD	P11413	CHEMBL5347	Enzyme	0.0	0 / 2
N-lysine methyltransferase SETD8	KMT5A	Q9NQR1	CHEMBL1795176	Writer	0.0	0 / 1
Lysine-specific demethylase 2A	KDM2A	Q9Y2K7	CHEMBL1938210	Eraser	0.0	1 / 0
Alpha-1a adrenergic receptor	ADRA1A	P35348	CHEMBL229	Family A G protein-coupled receptor	0.0	2 / 0
DNA polymerase beta (by homology)	POLB	P06746	CHEMBL2392	Enzyme	0.0	0 / 5
