# Supplementary material for: A Network Pharmacology-Based Study on Irritable Bowel Syndrome Prevention and Treatment Utilizing Shenling Baizhu Powder
Source: Biomed Res Int. 2021 Nov 23;2021:4579850. doi: 10.1155/2021/4579850 (PMC8632384; doi:10.1155/2021/4579850)
Supplement: Supplementary Materials — Please find detailed data in the supplementary file, including the original data of SymMap, metabolomics, and molecular docking of Shenling Baizhu powder. “Shenling Baizhu powder SymMap” includes all herbal targets and combined targets. “Shenling Baizhu powder metabolomics” includes two-dimensional structural data analysis. “Molecular docking” involves molecule-target docking and the results. [file 4579850.f1.zip › Data in brief/2. Shenling Baizhu powder Metabolomics/2D structure/24.csv]

Target	Common name	Uniprot ID	ChEMBL ID	Target Class	Probability*	Known actives (3D/2D)
Carbonic anhydrase VII	CA7	P43166	CHEMBL2326	Lyase	1.0	28 / 25
Carbonic anhydrase XII	CA12	O43570	CHEMBL3242	Lyase	1.0	53 / 47
Carbonic anhydrase IX	CA9	Q16790	CHEMBL3594	Lyase	1.0	65 / 64
Carbonic anhydrase XIII	CA13	Q8N1Q1	CHEMBL3912	Lyase	0.512183898969	6 / 27
Carbonic anhydrase I	CA1	P00915	CHEMBL261	Lyase	0.143752150428	64 / 27
Carbonic anhydrase XIV	CA14	Q9ULX7	CHEMBL3510	Lyase	0.113045471502	20 / 14
Carbonic anhydrase IV	CA4	P22748	CHEMBL3729	Lyase	0.0619149311119	2 / 8
Epidermal growth factor receptor erbB1	EGFR	P00533	CHEMBL203	Kinase	0.0517133123472	50 / 3
Carbonic anhydrase VA	CA5A	P35218	CHEMBL4789	Lyase	0.0517133123472	6 / 8
Xanthine dehydrogenase	XDH	P47989	CHEMBL1929	Oxidoreductase	0.0414702990123	3 / 2
Carbonic anhydrase VI	CA6	P23280	CHEMBL3025	Lyase	0.0414702990123	1 / 8
Carbonic anhydrase II	CA2	P00918	CHEMBL205	Lyase	0.0414702990123	83 / 9
Steroid 5-alpha-reductase 1	SRD5A1	P18405	CHEMBL1787	Oxidoreductase	0.0414702990123	2 / 4
Carbonyl reductase [NADPH] 1	CBR1	P16152	CHEMBL5586	Enzyme	0.0414702990123	0 / 2
Cyclin-dependent kinase 2/cyclin A	CDK2 CCNA1 CCNA2	P24941 P78396 P20248	CHEMBL2094128	Other cytosolic protein	0.0414702990123	18 / 1
Monoamine oxidase A	MAOA	P21397	CHEMBL1951	Oxidoreductase	0.0414702990123	25 / 71
Estrogen receptor beta	ESR2	Q92731	CHEMBL242	Nuclear receptor	0.0312265582077	7 / 62
Arachidonate 5-lipoxygenase	ALOX5	P09917	CHEMBL215	Oxidoreductase	0.0312265582077	16 / 1
Cyclin-dependent kinase 4/cyclin D1	CCND1 CDK4	P24385 P11802	CHEMBL1907601	Kinase	0.0312265582077	0 / 1
Vascular endothelial growth factor receptor 3	FLT4	P35916	CHEMBL1955	Kinase	0.0312265582077	0 / 1
Insulin receptor	INSR	P06213	CHEMBL1981	Kinase	0.0312265582077	0 / 1
Focal adhesion kinase 1	PTK2	Q05397	CHEMBL2695	Kinase	0.0312265582077	0 / 1
Serine/threonine-protein kinase PLK1	PLK1	P53350	CHEMBL3024	Kinase	0.0312265582077	0 / 2
Tyrosine-protein kinase TIE-2	TEK	Q02763	CHEMBL4128	Kinase	0.0312265582077	0 / 1
Mitogen-activated protein kinase kinase kinase 8	MAP3K8	P41279	CHEMBL4899	Kinase	0.0312265582077	0 / 1
Heat shock 70 kDa protein 1	HSPA1A	P0DMV8	CHEMBL5460	Other cytosolic protein	0.0312265582077	0 / 1
NUAK family SNF1-like kinase 1	NUAK1	O60285	CHEMBL5784	Kinase	0.0312265582077	0 / 1
Tyrosine-protein kinase FGR (by homology)	FGR	P09769	CHEMBL4454	Kinase	0.0312265582077	0 / 1
Carbonic anhydrase VB	CA5B	Q9Y2D0	CHEMBL3969	Lyase	0.0312265582077	4 / 8
Aldo-keto reductase family 1 member C1	AKR1C1	Q04828	CHEMBL5905	Enzyme	0.0312265582077	0 / 1
D-amino-acid oxidase	DAO	P14920	CHEMBL5485	Enzyme	0.0312265582077	17 / 1
Glycogen synthase kinase-3 beta	GSK3B	P49841	CHEMBL262	Kinase	0.0312265582077	25 / 1
Voltage-gated potassium channel subunit Kv1.3	KCNA3	P22001	CHEMBL4633	Voltage-gated ion channel	0.0312265582077	0 / 12
Cyclooxygenase-2	PTGS2	P35354	CHEMBL230	Oxidoreductase	0.0312265582077	7 / 5
Glutathione reductase	GSR	P00390	CHEMBL2755	Oxidoreductase	0.0312265582077	0 / 1
Estradiol 17-beta-dehydrogenase 3	HSD17B3	P37058	CHEMBL4234	Enzyme	0.0312265582077	11 / 18
Tyrosine-protein kinase SRC	SRC	P12931	CHEMBL267	Kinase	0.0312265582077	14 / 1
Vascular endothelial growth factor receptor 2	KDR	P35968	CHEMBL279	Kinase	0.0312265582077	17 / 2
Acetylcholinesterase	ACHE	P22303	CHEMBL220	Hydrolase	0.0312265582077	5 / 51
Cytochrome P450 1A2	CYP1A2	P05177	CHEMBL3356	Cytochrome P450	0.0312265582077	2 / 3
Arylamine N-acetyltransferase 1	NAT1	P18440	CHEMBL5101	Enzyme	0.0312265582077	3 / 0
Monoamine oxidase B	MAOB	P27338	CHEMBL2039	Oxidoreductase	0.0312265582077	28 / 116
Protein-tyrosine phosphatase 1B	PTPN1	P18031	CHEMBL335	Phosphatase	0.0312265582077	2 / 0
Estrogen receptor alpha	ESR1	P03372	CHEMBL206	Nuclear receptor	0.0312265582077	4 / 43
Myoglobin	MB	P02144	CHEMBL2406892	Unclassified protein	0.0312265582077	4 / 0
Poly [ADP-ribose] polymerase-1	PARP1	P09874	CHEMBL3105	Enzyme	0.0312265582077	14 / 0
Calcium-activated potassium channel subunit alpha-1	KCNMA1	Q12791	CHEMBL4304	Voltage-gated ion channel	0.0312265582077	6 / 0
Receptor protein-tyrosine kinase erbB-2	ERBB2	P04626	CHEMBL1824	Kinase	0.0312265582077	5 / 1
Squalene monooxygenase (by homology)	SQLE	Q14534	CHEMBL3592	Enzyme	0.0312265582077	1 / 1
Beta-secretase 1	BACE1	P56817	CHEMBL4822	Protease	0.0312265582077	9 / 6
Hepatocyte growth factor receptor	MET	P08581	CHEMBL3717	Kinase	0.0312265582077	27 / 2
Catechol O-methyltransferase (by homology)	COMT	P21964	CHEMBL2023	Transferase	0.0312265582077	3 / 0
G-protein coupled receptor 35	GPR35	Q9HC97	CHEMBL1293267	Family A G protein-coupled receptor	0.0312265582077	1 / 2
CDK9/cyclin T1	CDK9 CCNT1	P50750 O60563	CHEMBL2111389	Other cytosolic protein	0.0312265582077	1 / 0
Aldo-keto-reductase family 1 member C3	AKR1C3	P42330	CHEMBL4681	Enzyme	0.0312265582077	1 / 1
Alkaline phosphatase placental-like	ALPG	P10696	CHEMBL3402	Enzyme	0.0312265582077	4 / 0
Phospholipase A-2-activating protein	PLAA	Q9Y263	CHEMBL6114	Unclassified protein	0.0312265582077	7 / 0
Aldose reductase	AKR1B1	P15121	CHEMBL1900	Enzyme	0.0312265582077	5 / 9
Serine/threonine-protein kinase Aurora-A	AURKA	O14965	CHEMBL4722	Kinase	0.0312265582077	8 / 1
Muscarinic acetylcholine receptor M1 (by homology)	CHRM1	P11229	CHEMBL216	Family A G protein-coupled receptor	0.0312265582077	4 / 0
Amine oxidase, copper containing	AOC3	Q16853	CHEMBL3437	Enzyme	0.0312265582077	1 / 0
Serine/threonine-protein kinase Aurora-B	AURKB	Q96GD4	CHEMBL2185	Kinase	0.0312265582077	5 / 3
CDGSH iron-sulfur domain-containing protein 1	CISD1	Q9NZ45	CHEMBL1795168	Unclassified protein	0.0312265582077	2 / 0
Serine/threonine-protein kinase AKT	AKT1	P31749	CHEMBL4282	Kinase	0.0	3 / 1
Plectin	PLEC	Q15149	CHEMBL1293240	Unclassified protein	0.0	1 / 0
Casein kinase I alpha	CSNK1A1	P48729	CHEMBL2793	Kinase	0.0	1 / 0
Casein kinase I delta	CSNK1D	P48730	CHEMBL2828	Kinase	0.0	1 / 0
HMG-CoA reductase	HMGCR	P04035	CHEMBL402	Oxidoreductase	0.0	3 / 0
Alkaline phosphatase, tissue-nonspecific isozyme	ALPL	P05186	CHEMBL5979	Enzyme	0.0	10 / 0
Serine/threonine-protein kinase B-raf	BRAF	P15056	CHEMBL5145	Kinase	0.0	3 / 1
Succinate semialdehyde dehydrogenase	ALDH5A1	P51649	CHEMBL1911	Oxidoreductase	0.0	1 / 0
Gamma-amino-N-butyrate transaminase	ABAT	P80404	CHEMBL2044	Transferase	0.0	3 / 0
Casein kinase II alpha	CSNK2A1	P68400	CHEMBL3629	Kinase	0.0	2 / 2
DNA-(apurinic or apyrimidinic site) lyase	APEX1	P27695	CHEMBL5619	Enzyme	0.0	0 / 1
Interleukin-8 receptor A	CXCR1	P25024	CHEMBL4029	Family A G protein-coupled receptor	0.0	1 / 0
PI3-kinase p110-gamma subunit	PIK3CG	P48736	CHEMBL3267	Enzyme	0.0	9 / 0
Dual specificty protein kinase CLK1	CLK1	P49759	CHEMBL4224	Kinase	0.0	11 / 0
Dual specificity tyrosine-phosphorylation-regulated kinase 1B	DYRK1B	Q9Y463	CHEMBL5543	Kinase	0.0	14 / 0
Insulin-like growth factor I receptor	IGF1R	P08069	CHEMBL1957	Kinase	0.0	3 / 2
Leukocyte common antigen	PTPRC	P08575	CHEMBL3243	Enzyme	0.0	4 / 0
G protein-coupled receptor kinase 6	GRK6	P43250	CHEMBL6144	Kinase	0.0	0 / 1
Troponin, cardiac muscle	TNNC1 TNNT2 TNNI3	P63316 P45379 P19429	CHEMBL2095202	Unclassified protein	0.0	0 / 1
Ephrin receptor	EPHB4	P54760	CHEMBL5147	Kinase	0.0	4 / 1
Platelet-derived growth factor receptor beta	PDGFRB	P09619	CHEMBL1913	Kinase	0.0	1 / 1
Serine/threonine-protein kinase PLK4	PLK4	O00444	CHEMBL3788	Kinase	0.0	4 / 1
Tyrosine-protein kinase Lyn	LYN	P07948	CHEMBL3905	Kinase	0.0	1 / 1
Purine nucleoside phosphorylase (by homology)	PNP	P00491	CHEMBL4338	Enzyme	0.0	11 / 0
Trace amine-associated receptor 1 (by homology)	TAAR1	Q96RJ0	CHEMBL5857	Family A G protein-coupled receptor	0.0	46 / 0
Serine/threonine-protein kinase PIM3	PIM3	Q86V86	CHEMBL5407	Kinase	0.0	14 / 0
Serotonin 2b (5-HT2b) receptor	HTR2B	P41595	CHEMBL1833	Family A G protein-coupled receptor	0.0	12 / 0
Telomerase reverse transcriptase	TERT	O14746	CHEMBL2916	Enzyme	0.0	5 / 0
Carbonic anhydrase III	CA3	P07451	CHEMBL2885	Lyase	0.0	2 / 6
Tyrosine-protein kinase JAK1	JAK1	P23458	CHEMBL2835	Kinase	0.0	3 / 0
Tyrosine-protein kinase JAK2	JAK2	O60674	CHEMBL2971	Kinase	0.0	8 / 0
Tyrosine-protein kinase TYK2	TYK2	P29597	CHEMBL3553	Kinase	0.0	3 / 0
Thrombin	F2	P00734	CHEMBL204	Protease	0.0	9 / 0
Serine/threonine-protein kinase Chk1	CHEK1	O14757	CHEMBL4630	Kinase	0.0	13 / 0
Serine/threonine-protein kinase WEE1	WEE1	P30291	CHEMBL5491	Kinase	0.0	2 / 0
Alpha-2a adrenergic receptor	ADRA2A	P08913	CHEMBL1867	Family A G protein-coupled receptor	0.0	8 / 0
Adrenergic receptor alpha-2	ADRA2C	P18825	CHEMBL1916	Family A G protein-coupled receptor	0.0	7 / 0
