# Supplementary material for: A Network Pharmacology-Based Study on Irritable Bowel Syndrome Prevention and Treatment Utilizing Shenling Baizhu Powder
Source: Biomed Res Int. 2021 Nov 23;2021:4579850. doi: 10.1155/2021/4579850 (PMC8632384; doi:10.1155/2021/4579850)
Supplement: Supplementary Materials — Please find detailed data in the supplementary file, including the original data of SymMap, metabolomics, and molecular docking of Shenling Baizhu powder. “Shenling Baizhu powder SymMap” includes all herbal targets and combined targets. “Shenling Baizhu powder metabolomics” includes two-dimensional structural data analysis. “Molecular docking” involves molecule-target docking and the results. [file 4579850.f1.zip › Data in brief/2. Shenling Baizhu powder Metabolomics/2D structure/26.csv]

Target	Common name	Uniprot ID	ChEMBL ID	Target Class	Probability*	Known actives (3D/2D)
Carbonic anhydrase II	CA2	P00918	CHEMBL205	Lyase	1.0	40 / 20
Carbonic anhydrase VII	CA7	P43166	CHEMBL2326	Lyase	1.0	6 / 19
Carbonic anhydrase I	CA1	P00915	CHEMBL261	Lyase	1.0	34 / 24
Carbonic anhydrase VI	CA6	P23280	CHEMBL3025	Lyase	1.0	5 / 15
Carbonic anhydrase XII	CA12	O43570	CHEMBL3242	Lyase	1.0	17 / 21
Carbonic anhydrase XIV	CA14	Q9ULX7	CHEMBL3510	Lyase	1.0	7 / 19
Carbonic anhydrase IX	CA9	Q16790	CHEMBL3594	Lyase	1.0	14 / 26
Carbonic anhydrase VA	CA5A	P35218	CHEMBL4789	Lyase	1.0	5 / 15
Carbonic anhydrase VB	CA5B	Q9Y2D0	CHEMBL3969	Lyase	0.133586596823	4 / 13
Monoamine oxidase B	MAOB	P27338	CHEMBL2039	Oxidoreductase	0.0721804396226	2 / 38
Arachidonate 5-lipoxygenase	ALOX5	P09917	CHEMBL215	Oxidoreductase	0.0721804396226	1 / 44
Matrix metalloproteinase 9	MMP9	P14780	CHEMBL321	Protease	0.0721804396226	1 / 24
Matrix metalloproteinase 1	MMP1	P03956	CHEMBL332	Protease	0.0721804396226	1 / 24
Matrix metalloproteinase 2	MMP2	P08253	CHEMBL333	Protease	0.0721804396226	1 / 23
Protein-tyrosine phosphatase 1B	PTPN1	P18031	CHEMBL335	Phosphatase	0.0721804396226	27 / 2
Carbonic anhydrase XIII (by homology)	CA13	Q8N1Q1	CHEMBL3912	Lyase	0.0721804396226	2 / 10
Carbonic anhydrase III	CA3	P07451	CHEMBL2885	Lyase	0.0619149311119	3 / 4
Aldose reductase	AKR1B1	P15121	CHEMBL1900	Enzyme	0.0517133123472	60 / 34
Beta amyloid A4 protein	APP	P05067	CHEMBL2487	Membrane receptor	0.0517133123472	0 / 55
Nuclear factor erythroid 2-related factor 2	NFE2L2	Q16236	CHEMBL1075094	Unclassified protein	0.0414702990123	0 / 4
Signal transducer and activator of transcription 3	STAT3	P40763	CHEMBL4026	Transcription factor	0.0414702990123	0 / 1
11-beta-hydroxysteroid dehydrogenase 1	HSD11B1	P28845	CHEMBL4235	Enzyme	0.0414702990123	0 / 4
Estrogen receptor beta	ESR2	Q92731	CHEMBL242	Nuclear receptor	0.0414702990123	3 / 17
Carbonic anhydrase IV	CA4	P22748	CHEMBL3729	Lyase	0.0414702990123	2 / 7
Toll-like receptor 4 (by homology)	TLR4	O00206	CHEMBL5255	Toll-like and Il-1 receptors	0.0414702990123	0 / 13
Hepatocyte growth factor receptor	MET	P08581	CHEMBL3717	Kinase	0.0312265582077	0 / 22
Cytochrome P450 1A1	CYP1A1	P04798	CHEMBL2231	Cytochrome P450	0.0312265582077	0 / 9
Cytochrome P450 1A2	CYP1A2	P05177	CHEMBL3356	Cytochrome P450	0.0312265582077	0 / 5
Quinone reductase 2	NQO2	P16083	CHEMBL3959	Enzyme	0.0312265582077	0 / 17
Cytochrome P450 1B1	CYP1B1	Q16678	CHEMBL4878	Cytochrome P450	0.0312265582077	0 / 25
Cyclooxygenase-1	PTGS1	P23219	CHEMBL221	Oxidoreductase	0.0312265582077	2 / 17
Epidermal growth factor receptor erbB1	EGFR	P00533	CHEMBL203	Kinase	0.0312265582077	4 / 34
Transthyretin	TTR	P02766	CHEMBL3194	Secreted protein	0.0312265582077	5 / 6
Cyclooxygenase-2	PTGS2	P35354	CHEMBL230	Oxidoreductase	0.0312265582077	9 / 47
Tubulin beta-1 chain	TUBB1	Q9H4B7	CHEMBL1915	Structural protein	0.0312265582077	0 / 29
Nuclear factor NF-kappa-B p65 subunit	RELA	Q04206	CHEMBL5533	Transcription factor	0.0312265582077	0 / 13
Adenosine A1 receptor	ADORA1	P30542	CHEMBL226	Family A G protein-coupled receptor	0.0312265582077	0 / 1
Adenosine A2a receptor	ADORA2A	P29274	CHEMBL251	Family A G protein-coupled receptor	0.0312265582077	0 / 1
Adenosine A2b receptor	ADORA2B	P29275	CHEMBL255	Family A G protein-coupled receptor	0.0312265582077	0 / 1
Toll-like receptor (TLR7/TLR9)	TLR9	Q9NR96	CHEMBL5804	Toll-like and Il-1 receptors	0.0312265582077	0 / 3
Aldo-keto reductase family 1 member B10	AKR1B10	O60218	CHEMBL5983	Enzyme	0.0312265582077	0 / 18
Arachidonate 15-lipoxygenase	ALOX15	P16050	CHEMBL2903	Enzyme	0.0312265582077	0 / 2
Protein kinase C epsilon	PRKCE	Q02156	CHEMBL3582	Kinase	0.0312265582077	0 / 2
Coagulation factor VII/tissue factor	F3	P13726	CHEMBL4081	Surface antigen	0.0312265582077	0 / 9
Nitric oxide synthase, inducible	NOS2	P35228	CHEMBL4481	Enzyme	0.0312265582077	0 / 7
Tyrosine-protein kinase FYN	FYN	P06241	CHEMBL1841	Kinase	0.0312265582077	4 / 2
Tyrosine-protein kinase LCK	LCK	P06239	CHEMBL258	Kinase	0.0312265582077	4 / 9
Monocarboxylate transporter 1 (by homology)	SLC16A1	P53985	CHEMBL4360	Electrochemical transporter	0.0312265582077	2 / 12
Cyclin-dependent kinase 4/cyclin D1	CCND1 CDK4	P24385 P11802	CHEMBL1907601	Kinase	0.0312265582077	0 / 1
Tubulin beta-3 chain	TUBB3	Q13509	CHEMBL2597	Structural protein	0.0312265582077	0 / 1
P-glycoprotein 1	ABCB1	P08183	CHEMBL4302	Primary active transporter	0.0312265582077	0 / 14
DNA topoisomerase II alpha	TOP2A	P11388	CHEMBL1806	Isomerase	0.0312265582077	0 / 15
Fructose-1,6-bisphosphatase	FBP1	P09467	CHEMBL3975	Enzyme	0.0312265582077	22 / 0
Beta-secretase 1	BACE1	P56817	CHEMBL4822	Protease	0.0312265582077	1 / 62
Glyoxalase I	GLO1	Q04760	CHEMBL2424	Enzyme	0.0312265582077	0 / 5
Carboxypeptidase A1	CPA1	P15085	CHEMBL2088	Protease	0.0312265582077	8 / 0
Lysine-specific demethylase 4C	KDM4C	Q9H3R0	CHEMBL6175	Eraser	0.0312265582077	7 / 0
Aryl hydrocarbon receptor	AHR	P35869	CHEMBL3201	Transcription factor	0.0312265582077	0 / 4
AMP deaminase 3	AMPD3	Q01432	CHEMBL2912	Enzyme	0.0312265582077	3 / 0
Poly [ADP-ribose] polymerase-1	PARP1	P09874	CHEMBL3105	Enzyme	0.0312265582077	9 / 0
Inhibitor of NF-kappa-B kinase (IKK)	IKBKG IKBKB CHUK	Q9Y6K9 O14920 O15111	CHEMBL2111328	Kinase	0.0	0 / 3
Solute carrier family 13 member 5	SLC13A5	Q86YT5	CHEMBL3769293	Electrochemical transporter	0.0	10 / 0
Monoamine oxidase A	MAOA	P21397	CHEMBL1951	Oxidoreductase	0.0	2 / 14
Norepinephrine transporter	SLC6A2	P23975	CHEMBL222	Electrochemical transporter	0.0	0 / 2
MAP kinase ERK2	MAPK1	P28482	CHEMBL4040	Kinase	0.0	0 / 1
Aldo-keto reductase family 1 member C4	AKR1C4	P17516	CHEMBL4999	Enzyme	0.0	0 / 1
Thrombin	F2	P00734	CHEMBL204	Protease	0.0	9 / 0
Macrophage migration inhibitory factor	MIF	P14174	CHEMBL2085	Enzyme	0.0	1 / 1
Low affinity neurotrophin receptor p75NTR	NGFR	P08138	CHEMBL4762	Membrane receptor	0.0	1 / 0
Dual-specificity tyrosine-phosphorylation regulated kinase 1A	DYRK1A	Q13627	CHEMBL2292	Kinase	0.0	0 / 7
Dual-specificity tyrosine-phosphorylation regulated kinase 2	DYRK2	Q92630	CHEMBL4376	Kinase	0.0	0 / 3
Dual specificity tyrosine-phosphorylation-regulated kinase 1B	DYRK1B	Q9Y463	CHEMBL5543	Kinase	0.0	0 / 6
Axin1/beta-catenin	CTNNB1	P35222	CHEMBL5866	Unclassified protein	0.0	3 / 0
Neprilysin	MME	P08473	CHEMBL1944	Protease	0.0	22 / 0
ATP-citrate synthase	ACLY	P53396	CHEMBL3720	Enzyme	0.0	12 / 0
Endothelin-converting enzyme 1	ECE1	P42892	CHEMBL4791	Protease	0.0	6 / 0
Alkaline phosphatase, tissue-nonspecific isozyme	ALPL	P05186	CHEMBL5979	Enzyme	0.0	9 / 0
Endothelin receptor ET-A (by homology)	EDNRA	P25101	CHEMBL252	Family A G protein-coupled receptor	0.0	0 / 22
Microtubule-associated protein tau	MAPT	P10636	CHEMBL1293224	Unclassified protein	0.0	0 / 1
c-Jun N-terminal kinase 1	MAPK8	P45983	CHEMBL2276	Kinase	0.0	2 / 0
ATP-binding cassette sub-family G member 2	ABCG2	Q9UNQ0	CHEMBL5393	Primary active transporter	0.0	0 / 33
Angiotensin-converting enzyme (by homology)	ACE	P12821	CHEMBL1808	Protease	0.0	16 / 0
Kynurenine 3-monooxygenase (by homology)	KMO	O15229	CHEMBL2145	Oxidoreductase	0.0	14 / 0
Renin	REN	P00797	CHEMBL286	Protease	0.0	1 / 0
P2X purinoceptor 3	P2RX3	P56373	CHEMBL2998	Ligand-gated ion channel	0.0	6 / 0
Egl nine homolog 1	EGLN1	Q9GZT9	CHEMBL5697	Oxidoreductase	0.0	8 / 0
G protein-coupled receptor kinase 6	GRK6	P43250	CHEMBL6144	Kinase	0.0	10 / 0
Histone acetyltransferase p300	EP300	Q09472	CHEMBL3784	Writer	0.0	1 / 3
Lysine-specific demethylase 4D-like	KDM4E	B2RXH2	CHEMBL1293226	Eraser	0.0	4 / 0
Glutamate carboxypeptidase II	FOLH1	Q04609	CHEMBL1892	Protease	0.0	19 / 0
Lysine-specific demethylase 4A	KDM4A	O75164	CHEMBL5896	Eraser	0.0	5 / 0
Alpha-ketoglutarate-dependent dioxygenase FTO	FTO	Q9C0B1	CHEMBL2331065	Oxidoreductase	0.0	2 / 0
Leukocyte elastase	ELANE	P08246	CHEMBL248	Protease	0.0	0 / 2
Estradiol 17-beta-dehydrogenase 2	HSD17B2	P37059	CHEMBL2789	Enzyme	0.0	0 / 2
Estradiol 17-beta-dehydrogenase 1	HSD17B1	P14061	CHEMBL3181	Enzyme	0.0	0 / 2
Cytochrome P450 2C9	CYP2C9	P11712	CHEMBL3397	Cytochrome P450	0.0	0 / 3
Cytochrome P450 3A4	CYP3A4	P08684	CHEMBL340	Cytochrome P450	0.0	0 / 3
Cytochrome P450 2C19	CYP2C19	P33261	CHEMBL3622	Cytochrome P450	0.0	0 / 3
Tyrosyl-DNA phosphodiesterase 1	TDP1	Q9NUW8	CHEMBL1075138	Enzyme	0.0	1 / 0
Mannose-6-phosphate isomerase	MPI	P34949	CHEMBL2758	Isomerase	0.0	1 / 0
