# Supplementary material for: A Network Pharmacology-Based Study on Irritable Bowel Syndrome Prevention and Treatment Utilizing Shenling Baizhu Powder
Source: Biomed Res Int. 2021 Nov 23;2021:4579850. doi: 10.1155/2021/4579850 (PMC8632384; doi:10.1155/2021/4579850)
Supplement: Supplementary Materials — Please find detailed data in the supplementary file, including the original data of SymMap, metabolomics, and molecular docking of Shenling Baizhu powder. “Shenling Baizhu powder SymMap” includes all herbal targets and combined targets. “Shenling Baizhu powder metabolomics” includes two-dimensional structural data analysis. “Molecular docking” involves molecule-target docking and the results. [file 4579850.f1.zip › Data in brief/2. Shenling Baizhu powder Metabolomics/2D structure/27.csv]

Target	Common name	Uniprot ID	ChEMBL ID	Target Class	Probability*	Known actives (3D/2D)
Cyclooxygenase-2	PTGS2	P35354	CHEMBL230	Oxidoreductase	0.0619149311119	61 / 46
Cyclooxygenase-1	PTGS1	P23219	CHEMBL221	Oxidoreductase	0.0517133123472	31 / 18
Aldo-keto-reductase family 1 member C3	AKR1C3	P42330	CHEMBL4681	Enzyme	0.0312265582077	59 / 1
14-3-3 protein gamma	YWHAG	P61981	CHEMBL1293296	Unclassified protein	0.0312265582077	0 / 1
G protein-coupled receptor 44	PTGDR2	Q9Y5Y4	CHEMBL5071	Family A G protein-coupled receptor	0.0312265582077	80 / 0
Palmitoleoyl-protein carboxylesterase NOTUM	NOTUM	Q6P988	CHEMBL3714531	Hydrolase	0.0312265582077	52 / 0
Aldose reductase	AKR1B1	P15121	CHEMBL1900	Enzyme	0.0312265582077	135 / 10
T1R1/T1R3_UNCURATED	TAS1R3 TAS1R1	Q7RTX0 Q7RTX1	CHEMBL3832641	Family C G protein-coupled receptor	0.0312265582077	1 / 0
DNA-(apurinic or apyrimidinic site) lyase	APEX1	P27695	CHEMBL5619	Enzyme	0.0312265582077	16 / 0
Egl nine homolog 3	EGLN3	Q9H6Z9	CHEMBL5705	Enzyme	0.0312265582077	2 / 0
Prostanoid DP receptor	PTGDR	Q13258	CHEMBL4427	Family A G protein-coupled receptor	0.0312265582077	8 / 0
c-Jun N-terminal kinase 3	MAPK10	P53779	CHEMBL2637	Kinase	0.0312265582077	2 / 0
Angiotensin-converting enzyme	ACE	P12821	CHEMBL1808	Protease	0.0312265582077	66 / 0
Neprilysin	MME	P08473	CHEMBL1944	Protease	0.0312265582077	33 / 0
Kynurenine 3-monooxygenase	KMO	O15229	CHEMBL2145	Oxidoreductase	0.0312265582077	51 / 0
Angiotensin-converting enzyme 2	ACE2	Q9BYF1	CHEMBL3736	Protease	0.0312265582077	3 / 0
Dual specificity phosphatase Cdc25B	CDC25B	P30305	CHEMBL4804	Phosphatase	0.0312265582077	4 / 0
Solute carrier family 22 member 12	SLC22A12	Q96S37	CHEMBL6120	Electrochemical transporter	0.0312265582077	29 / 0
Matrix metalloproteinase 12	MMP12	P39900	CHEMBL4393	Protease	0.0312265582077	4 / 0
Intercellular adhesion molecule (ICAM-1), Integrin alpha-L/beta-2	ITGAL ICAM1 ITGB2	P20701 P05362 P05107	CHEMBL2096661	Membrane receptor	0.0312265582077	26 / 0
Hydroxycarboxylic acid receptor 2	HCAR2	Q8TDS4	CHEMBL3785	Family A G protein-coupled receptor	0.0312265582077	30 / 0
Glutathione S-transferase A1	GSTA1	P08263	CHEMBL3409	Enzyme	0.0312265582077	1 / 0
Casein kinase II alpha	CSNK2A1	P68400	CHEMBL3629	Kinase	0.0312265582077	14 / 0
Glutathione S-transferase Pi	GSTP1	P09211	CHEMBL3902	Enzyme	0.0312265582077	1 / 0
Casein kinase II alpha (prime)	CSNK2A2	P19784	CHEMBL4070	Kinase	0.0312265582077	9 / 0
Neuronal acetylcholine receptor; alpha4/beta2	CHRNA4 CHRNB2	P43681 P17787	CHEMBL1907589	Ligand-gated ion channel	0.0312265582077	3 / 0
Lysine-specific demethylase 2A	KDM2A	Q9Y2K7	CHEMBL1938210	Eraser	0.0312265582077	5 / 0
Renin	REN	P00797	CHEMBL286	Protease	0.0312265582077	4 / 0
Mast cell carboxypeptidase A	CPA3	P15088	CHEMBL2645	Protease	0.0312265582077	2 / 0
Oxoeicosanoid receptor 1	OXER1	Q8TDS5	CHEMBL1628461	Family A G protein-coupled receptor	0.0312265582077	2 / 0
Lysine-specific demethylase 3A	KDM3A	Q9Y4C1	CHEMBL1938209	Eraser	0.0312265582077	3 / 0
Lysine-specific demethylase 5C	KDM5C	P41229	CHEMBL2163176	Eraser	0.0312265582077	8 / 0
Lysine-specific demethylase 4A	KDM4A	O75164	CHEMBL5896	Eraser	0.0312265582077	6 / 0
Lysine-specific demethylase 4C	KDM4C	Q9H3R0	CHEMBL6175	Eraser	0.0312265582077	26 / 0
Poly [ADP-ribose] polymerase-1	PARP1	P09874	CHEMBL3105	Enzyme	0.0312265582077	17 / 0
Poly [ADP-ribose] polymerase 2 (by homology)	PARP2	Q9UGN5	CHEMBL5366	Enzyme	0.0312265582077	4 / 0
Insulin-degrading enzyme	IDE	P14735	CHEMBL1293287	Enzyme	0.0312265582077	2 / 0
Protein phosphatase 2C beta	PPM1B	O75688	CHEMBL2845	Phosphatase	0.0312265582077	4 / 0
Vitronectin receptor alpha	ITGAV	P06756	CHEMBL3660	Membrane receptor	0.0	4 / 0
Metabotropic glutamate receptor 4	GRM4	Q14833	CHEMBL2736	Family C G protein-coupled receptor	0.0	3 / 0
Carboxypeptidase B2 isoform A	CPB2	Q96IY4	CHEMBL3419	Protease	0.0	10 / 0
Serine/threonine protein phosphatase PP1-gamma catalytic subunit	PPP1CC	P36873	CHEMBL4438	Phosphatase	0.0	3 / 0
Serine/threonine-protein kinase PIM2	PIM2	Q9P1W9	CHEMBL4523	Kinase	0.0	3 / 0
Lysine-specific demethylase 4D	KDM4D	Q6B0I6	CHEMBL6138	Eraser	0.0	6 / 0
Monocarboxylate transporter 1 (by homology)	SLC16A1	P53985	CHEMBL4360	Electrochemical transporter	0.0	11 / 0
Lysine-specific demethylase 4B	KDM4B	O94953	CHEMBL3313832	Eraser	0.0	3 / 0
Lysine-specific demethylase 5B	KDM5B	Q9UGL1	CHEMBL3774295	Eraser	0.0	5 / 0
G-protein coupled receptor kinase 2	GRK2	P25098	CHEMBL4079	Kinase	0.0	3 / 0
Branched-chain-amino-acid aminotransferase, mitochondrial	BCAT2	O15382	CHEMBL3616354	Transferase	0.0	2 / 0
Heat shock protein HSP 90-alpha	HSP90AA1	P07900	CHEMBL3880	Other cytosolic protein	0.0	2 / 0
CREB-binding protein/p53	CREBBP	Q92793	CHEMBL5747	Writer	0.0	2 / 0
CDK8/Cyclin C	CCNC CDK8	P24863 P49336	CHEMBL3038474	Kinase	0.0	1 / 0
Mitogen-activated protein kinase kinase kinase 8	MAP3K8	P41279	CHEMBL4899	Kinase	0.0	2 / 0
Phosphodiesterase 5A	PDE5A	O76074	CHEMBL1827	Phosphodiesterase	0.0	1 / 0
Neuronal acetylcholine receptor protein alpha-7 subunit	CHRNA7	P36544	CHEMBL2492	Ligand-gated ion channel	0.0	1 / 0
Aryl hydrocarbon receptor	AHR	P35869	CHEMBL3201	Transcription factor	0.0	1 / 0
Phosphodiesterase 9A	PDE9A	O76083	CHEMBL3535	Phosphodiesterase	0.0	2 / 0
Heat shock 70 kDa protein 1	HSPA1A	P0DMV8	CHEMBL5460	Other cytosolic protein	0.0	8 / 0
Monocarboxylate transporter 4	SLC16A3	O15427	CHEMBL2073663	Electrochemical transporter	0.0	7 / 0
Carbonic anhydrase II	CA2	P00918	CHEMBL205	Lyase	0.0	59 / 20
Endothelin-converting enzyme 1	ECE1	P42892	CHEMBL4791	Protease	0.0	5 / 0
Carboxypeptidase B	CPB1	P15086	CHEMBL2552	Protease	0.0	3 / 0
Lysine-specific demethylase 6B	KDM6B	O15054	CHEMBL1938211	Eraser	0.0	8 / 0
Serine/threonine-protein kinase PIM1	PIM1	P11309	CHEMBL2147	Kinase	0.0	7 / 0
CDGSH iron-sulfur domain-containing protein 1	CISD1	Q9NZ45	CHEMBL1795168	Unclassified protein	0.0	1 / 0
Poly [ADP-ribose] polymerase 15	PARP15	Q460N3	CHEMBL2176778	Enzyme	0.0	2 / 0
Poly [ADP-ribose] polymerase 10	PARP10	Q53GL7	CHEMBL2429708	Enzyme	0.0	5 / 0
SUMO-activating enzyme	SAE1 UBA2	Q9UBE0 Q9UBT2	CHEMBL2095174	Enzyme	0.0	1 / 0
Lysosomal protective protein	CTSA	P10619	CHEMBL6115	Protease	0.0	13 / 0
Arachidonate 15-lipoxygenase	ALOX15	P16050	CHEMBL2903	Enzyme	0.0	0 / 16
Plectin	PLEC	Q15149	CHEMBL1293240	Unclassified protein	0.0	2 / 0
Macrophage migration inhibitory factor	MIF	P14174	CHEMBL2085	Enzyme	0.0	1 / 0
D-amino-acid oxidase	DAO	P14920	CHEMBL5485	Enzyme	0.0	38 / 0
Aminopeptidase B	RNPEP	Q9H4A4	CHEMBL2432	Protease	0.0	2 / 0
Phospholipase A2 group IIA	PLA2G2A	P14555	CHEMBL3474	Enzyme	0.0	1 / 0
Egl nine homolog 1	EGLN1	Q9GZT9	CHEMBL5697	Oxidoreductase	0.0	5 / 0
Solute carrier organic anion transporter family member 1B1	SLCO1B1	Q9Y6L6	CHEMBL1697668	Electrochemical transporter	0.0	1 / 0
Neurotensin receptor 3	SORT1	Q99523	CHEMBL3091	Membrane receptor	0.0	10 / 0
Aldehyde reductase (by homology)	AKR1A1	P14550	CHEMBL2246	Enzyme	0.0	3 / 0
Interleukin-8 receptor A	CXCR1	P25024	CHEMBL4029	Family A G protein-coupled receptor	0.0	1 / 0
Aldo-keto reductase family 1 member B10	AKR1B10	O60218	CHEMBL5983	Enzyme	0.0	2 / 0
Serotonin 2a (5-HT2a) receptor (by homology)	HTR2A	P28223	CHEMBL224	Family A G protein-coupled receptor	0.0	0 / 25
Thyroid hormone receptor beta-1	THRB	P10828	CHEMBL1947	Nuclear receptor	0.0	8 / 47
Dual specificity protein phosphatase 3	DUSP3	P51452	CHEMBL2635	Phosphatase	0.0	2 / 0
Carboxypeptidase N, catalytic subunit	CPN1	P15169	CHEMBL4713	Protease	0.0	1 / 0
Adenosine A1 receptor (by homology)	ADORA1	P30542	CHEMBL226	Family A G protein-coupled receptor	0.0	1 / 0
Caspase-3	CASP3	P42574	CHEMBL2334	Protease	0.0	4 / 0
Glutathione reductase	GSR	P00390	CHEMBL2755	Oxidoreductase	0.0	2 / 0
Matrix metalloproteinase 2	MMP2	P08253	CHEMBL333	Protease	0.0	3 / 0
G protein-coupled receptor kinase 6	GRK6	P43250	CHEMBL6144	Kinase	0.0	5 / 0
Phospholipase A2 group 1VB	PLA2G4B	P0C869	CHEMBL4136	Enzyme	0.0	0 / 3
Transthyretin	TTR	P02766	CHEMBL3194	Secreted protein	0.0	5 / 7
Dopamine D2 receptor (by homology)	DRD2	P14416	CHEMBL217	Family A G protein-coupled receptor	0.0	0 / 25
Prostanoid EP1 receptor	PTGER1	P34995	CHEMBL1811	Family A G protein-coupled receptor	0.0	19 / 0
Carboxypeptidase A1	CPA1	P15085	CHEMBL2088	Protease	0.0	2 / 0
Interleukin-8 receptor B	CXCR2	P25025	CHEMBL2434	Family A G protein-coupled receptor	0.0	1 / 0
Serine/threonine-protein phosphatase	PPP5C	Q9BPW0	CHEMBL1293265	Phosphatase	0.0	2 / 0
Serine/threonine protein phosphatase PP1-alpha catalytic subunit	PPP1CA	P62136	CHEMBL2164	Phosphatase	0.0	6 / 0
Caspase-1	CASP1	P29466	CHEMBL4801	Protease	0.0	2 / 0
Protein-tyrosine phosphatase 1B	PTPN1	P18031	CHEMBL335	Phosphatase	0.0	3 / 3
