# Supplementary material for: A Network Pharmacology-Based Study on Irritable Bowel Syndrome Prevention and Treatment Utilizing Shenling Baizhu Powder
Source: Biomed Res Int. 2021 Nov 23;2021:4579850. doi: 10.1155/2021/4579850 (PMC8632384; doi:10.1155/2021/4579850)
Supplement: Supplementary Materials — Please find detailed data in the supplementary file, including the original data of SymMap, metabolomics, and molecular docking of Shenling Baizhu powder. “Shenling Baizhu powder SymMap” includes all herbal targets and combined targets. “Shenling Baizhu powder metabolomics” includes two-dimensional structural data analysis. “Molecular docking” involves molecule-target docking and the results. [file 4579850.f1.zip › Data in brief/2. Shenling Baizhu powder Metabolomics/2D structure/28.csv]

Target	Common name	Uniprot ID	ChEMBL ID	Target Class	Probability*	Known actives (3D/2D)
Cytochrome P450 19A1	CYP19A1	P11511	CHEMBL1978	Cytochrome P450	0.0940053518494	172 / 49
Potassium-transporting ATPase alpha chain 2	ATP12A	P54707	CHEMBL2933	Primary active transporter	0.0759736341678	0 / 10
Progesterone receptor	PGR	P06401	CHEMBL208	Nuclear receptor	0.0669750160137	20 / 41
Androgen Receptor	AR	P10275	CHEMBL1871	Nuclear receptor	0.0669750160137	29 / 55
Protein-tyrosine phosphatase 1B	PTPN1	P18031	CHEMBL335	Phosphatase	0.0579568757034	9 / 39
Tubulin--tyrosine ligase	TTL	Q8NG68	CHEMBL5549	Enzyme	0.0579568757034	0 / 17
Ribosomal protein S6 kinase alpha 5	RPS6KA5	O75582	CHEMBL4237	Kinase	0.048952897826	0 / 3
Taste receptor type 2 member 31	TAS2R31	P59538	CHEMBL2034804	Taste family G protein-coupled receptor	0.048952897826	0 / 1
Dual specificity phosphatase Cdc25B	CDC25B	P30305	CHEMBL4804	Phosphatase	0.048952897826	10 / 12
Peroxisome proliferator-activated receptor gamma	PPARG	P37231	CHEMBL235	Nuclear receptor	0.048952897826	2 / 9
Programmed cell death protein 4	PDCD4	Q53EL6	CHEMBL1781868	Unclassified protein	0.048952897826	0 / 8
Phospholipase A2 group 1B	PLA2G1B	P04054	CHEMBL4426	Enzyme	0.048952897826	0 / 4
Dual specificity phosphatase Cdc25C	CDC25C	P30307	CHEMBL2378	Phosphatase	0.048952897826	0 / 4
HMG-CoA reductase (by homology)	HMGCR	P04035	CHEMBL402	Oxidoreductase	0.048952897826	0 / 46
RAS guanyl releasing protein 3	RASGRP3	Q8IV61	CHEMBL3638	Other cytosolic protein	0.048952897826	0 / 1
Muscarinic acetylcholine receptor M4	CHRM4	P08173	CHEMBL1821	Family A G protein-coupled receptor	0.048952897826	6 / 0
Muscarinic acetylcholine receptor M5	CHRM5	P08912	CHEMBL2035	Family A G protein-coupled receptor	0.048952897826	8 / 0
Muscarinic acetylcholine receptor M2	CHRM2	P08172	CHEMBL211	Family A G protein-coupled receptor	0.048952897826	24 / 0
Muscarinic acetylcholine receptor M1	CHRM1	P11229	CHEMBL216	Family A G protein-coupled receptor	0.048952897826	29 / 0
Muscarinic acetylcholine receptor M3	CHRM3	P20309	CHEMBL245	Family A G protein-coupled receptor	0.048952897826	10 / 0
Peroxisome proliferator-activated receptor alpha	PPARA	Q07869	CHEMBL239	Nuclear receptor	0.048952897826	0 / 4
Peroxisome proliferator-activated receptor delta	PPARD	Q03181	CHEMBL3979	Nuclear receptor	0.048952897826	0 / 3
Protein kinase C alpha	PRKCA	P17252	CHEMBL299	Kinase	0.048952897826	2 / 190
Dual specificity phosphatase Cdc25A	CDC25A	P30304	CHEMBL3775	Phosphatase	0.048952897826	4 / 16
Tyrosine-protein kinase receptor FLT3	FLT3	P36888	CHEMBL1974	Kinase	0.048952897826	5 / 0
Cytochrome P450 11B2	CYP11B2	P19099	CHEMBL2722	Cytochrome P450	0.048952897826	112 / 0
Cytochrome P450 11B1	CYP11B1	P15538	CHEMBL1908	Cytochrome P450	0.048952897826	91 / 0
Kinesin-like protein 1	KIF11	P52732	CHEMBL4581	Other cytosolic protein	0.048952897826	2 / 0
Thromboxane-A synthase	TBXAS1	P24557	CHEMBL1835	Cytochrome P450	0.048952897826	17 / 0
Carbonic anhydrase III	CA3	P07451	CHEMBL2885	Lyase	0.048952897826	4 / 0
Steroid 5-alpha-reductase 1	SRD5A1	P18405	CHEMBL1787	Oxidoreductase	0.048952897826	59 / 0
Myeloperoxidase	MPO	P05164	CHEMBL2439	Enzyme	0.048952897826	7 / 0
Protein farnesyltransferase	FNTA FNTB	P49354 P49356	CHEMBL2094108	Enzyme	0.048952897826	11 / 9
Monoamine oxidase A	MAOA	P21397	CHEMBL1951	Oxidoreductase	0.048952897826	38 / 1
Thymidylate synthase	TYMS	P04818	CHEMBL1952	Transferase	0.048952897826	5 / 0
Alcohol dehydrogenase alpha chain	ADH1A	P07327	CHEMBL1970	Oxidoreductase	0.048952897826	13 / 0
DNA-dependent protein kinase	PRKDC	P78527	CHEMBL3142	Kinase	0.048952897826	1 / 0
Potassium channel subfamily K member 2 (by homology)	KCNK2	O95069	CHEMBL2321615	Voltage-gated ion channel	0.048952897826	1 / 0
Poly [ADP-ribose] polymerase-1	PARP1	P09874	CHEMBL3105	Enzyme	0.048952897826	30 / 0
Leukocyte common antigen	PTPRC	P08575	CHEMBL3243	Enzyme	0.048952897826	5 / 0
Receptor-type tyrosine-protein phosphatase F (LAR)	PTPRF	P10586	CHEMBL3521	Membrane receptor	0.048952897826	2 / 0
Exportin-1	XPO1	O14980	CHEMBL5661	Unclassified protein	0.048952897826	2 / 0
11-beta-hydroxysteroid dehydrogenase 2	HSD11B2	P80365	CHEMBL3746	Enzyme	0.048952897826	0 / 8
Melatonin receptor 1A	MTNR1A	P48039	CHEMBL1945	Family A G protein-coupled receptor	0.048952897826	41 / 0
Melatonin receptor 1B	MTNR1B	P49286	CHEMBL1946	Family A G protein-coupled receptor	0.048952897826	30 / 0
Cytochrome P450 17A1	CYP17A1	P05093	CHEMBL3522	Cytochrome P450	0.048952897826	46 / 7
Interleukin-1 beta	IL1B	P01584	CHEMBL1909490	Secreted protein	0.048952897826	0 / 2
Cathepsin K	CTSK	P43235	CHEMBL268	Protease	0.048952897826	56 / 0
Mineralocorticoid receptor	NR3C2	P08235	CHEMBL1994	Nuclear receptor	0.048952897826	2 / 16
Aryl hydrocarbon receptor	AHR	P35869	CHEMBL3201	Transcription factor	0.0	1 / 0
Subtilisin/kexin type 7	PCSK7	Q16549	CHEMBL2232	Protease	0.0	0 / 1
GABA-A receptor; alpha-5/beta-3/gamma-2	GABRB3 GABRG2 GABRA5	P28472 P18507 P31644	CHEMBL2094122	Ligand-gated ion channel	0.0	31 / 0
Proteinase-activated receptor 2	F2RL1	P55085	CHEMBL5963	Family A G protein-coupled receptor	0.0	0 / 1
Serine/threonine protein phosphatase 2A, catalytic subunit, alpha isoform	PPP2CA	P67775	CHEMBL4703	Phosphatase	0.0	0 / 6
Epoxide hydrolase 1	EPHX1	P07099	CHEMBL1968	Protease	0.0	35 / 0
11-beta-hydroxysteroid dehydrogenase 1	HSD11B1	P28845	CHEMBL4235	Enzyme	0.0	72 / 19
Leucine-rich repeat serine/threonine-protein kinase 2	LRRK2	Q5S007	CHEMBL1075104	Kinase	0.0	7 / 0
Cathepsin L	CTSL	P07711	CHEMBL3837	Protease	0.0	23 / 0
Cathepsin (B and K)	CTSB	P07858	CHEMBL4072	Protease	0.0	27 / 0
Isoleucyl-tRNA synthetase	IARS	P41252	CHEMBL3235	Enzyme	0.0	0 / 1
Neuronal acetylcholine receptor; alpha4/beta2	CHRNA4 CHRNB2	P43681 P17787	CHEMBL1907589	Ligand-gated ion channel	0.0	6 / 0
Monoamine oxidase B	MAOB	P27338	CHEMBL2039	Oxidoreductase	0.0	87 / 0
Adrenergic receptor alpha-2	ADRA2C	P18825	CHEMBL1916	Family A G protein-coupled receptor	0.0	4 / 0
Inosine-5'-monophosphate dehydrogenase 2	IMPDH2	P12268	CHEMBL2002	Oxidoreductase	0.0	2 / 0
Cholesterol esterase	CEL	P19835	CHEMBL3219	Enzyme	0.0	4 / 0
Norepinephrine transporter	SLC6A2	P23975	CHEMBL222	Electrochemical transporter	0.0	21 / 0
Estradiol 17-beta-dehydrogenase 3	HSD17B3	P37058	CHEMBL4234	Enzyme	0.0	17 / 0
Matrix metalloproteinase 13	MMP13	P45452	CHEMBL280	Protease	0.0	5 / 0
Matrix metalloproteinase 1	MMP1	P03956	CHEMBL332	Protease	0.0	3 / 0
Vascular endothelial growth factor receptor 2	KDR	P35968	CHEMBL279	Kinase	0.0	11 / 0
Tyrosine-protein kinase JAK1	JAK1	P23458	CHEMBL2835	Kinase	0.0	15 / 0
Tyrosine-protein kinase JAK2	JAK2	O60674	CHEMBL2971	Kinase	0.0	23 / 0
Kir3.1/Kir3.4	KCNJ5 KCNJ3	P48544 P48549	CHEMBL3038488	Voltage-gated ion channel	0.0	1 / 0
Serine/threonine-protein kinase Aurora-A	AURKA	O14965	CHEMBL4722	Kinase	0.0	5 / 0
Polyadenylate-binding protein 1	PABPC1	P11940	CHEMBL1293286	Unclassified protein	0.0	4 / 0
Carbonic anhydrase II	CA2	P00918	CHEMBL205	Lyase	0.0	11 / 0
Sigma opioid receptor	SIGMAR1	Q99720	CHEMBL287	Membrane receptor	0.0	4 / 0
Glucocorticoid receptor	NR3C1	P04150	CHEMBL2034	Nuclear receptor	0.0	10 / 10
MAP kinase p38 alpha	MAPK14	Q16539	CHEMBL260	Kinase	0.0	13 / 0
NAD-dependent deacetylase sirtuin 2	SIRT2	Q8IXJ6	CHEMBL4462	Eraser	0.0	9 / 0
Phospholipase A2 group IIA	PLA2G2A	P14555	CHEMBL3474	Enzyme	0.0	1 / 8
Alcohol dehydrogenase gamma chain	ADH1C	P00326	CHEMBL3285	Oxidoreductase	0.0	5 / 0
Tankyrase-2	TNKS2	Q9H2K2	CHEMBL6154	Enzyme	0.0	20 / 0
Tankyrase-1	TNKS	O95271	CHEMBL6164	Enzyme	0.0	5 / 0
Dopamine D4 receptor	DRD4	P21917	CHEMBL219	Family A G protein-coupled receptor	0.0	5 / 0
Metabotropic glutamate receptor 5 (by homology)	GRM5	P41594	CHEMBL3227	Family C G protein-coupled receptor	0.0	37 / 0
Cytochrome P450 2A6	CYP2A6	P11509	CHEMBL5282	Cytochrome P450	0.0	14 / 0
Cyclooxygenase-2	PTGS2	P35354	CHEMBL230	Oxidoreductase	0.0	47 / 12
Angiotensin-converting enzyme (by homology)	ACE	P12821	CHEMBL1808	Protease	0.0	4 / 0
Glucagon receptor	GCGR	P47871	CHEMBL1985	Family B G protein-coupled receptor	0.0	3 / 0
Quinone reductase 2	NQO2	P16083	CHEMBL3959	Enzyme	0.0	11 / 0
Protein-tyrosine phosphatase 2C	PTPN11	Q06124	CHEMBL3864	Phosphatase	0.0	0 / 2
Phosphodiesterase 7A	PDE7A	Q13946	CHEMBL3012	Phosphodiesterase	0.0	34 / 0
Glycogen synthase kinase-3 beta	GSK3B	P49841	CHEMBL262	Kinase	0.0	35 / 3
Apoptosis regulator Bcl-X	BCL2L1	Q07817	CHEMBL4625	Other ion channel	0.0	0 / 3
PI3-kinase p110-delta/p85-alpha	PIK3CD PIK3R1	O00329 P27986	CHEMBL2111432	Enzyme	0.0	1 / 0
Interleukin-8 receptor A	CXCR1	P25024	CHEMBL4029	Family A G protein-coupled receptor	0.0	0 / 2
GABA-A receptor; alpha-3/beta-3/gamma-2	GABRB3 GABRA3 GABRG2	P28472 P34903 P18507	CHEMBL2094120	Ligand-gated ion channel	0.0	7 / 0
GABA-A receptor; alpha-1/beta-3/gamma-2	GABRB3 GABRG2 GABRA1	P28472 P18507 P14867	CHEMBL2094121	Ligand-gated ion channel	0.0	6 / 0
GABA-A receptor; alpha-2/beta-3/gamma-2	GABRA2 GABRB3 GABRG2	P47869 P28472 P18507	CHEMBL2094130	Ligand-gated ion channel	0.0	7 / 0
