# Supplementary material for: A Network Pharmacology-Based Study on Irritable Bowel Syndrome Prevention and Treatment Utilizing Shenling Baizhu Powder
Source: Biomed Res Int. 2021 Nov 23;2021:4579850. doi: 10.1155/2021/4579850 (PMC8632384; doi:10.1155/2021/4579850)
Supplement: Supplementary Materials — Please find detailed data in the supplementary file, including the original data of SymMap, metabolomics, and molecular docking of Shenling Baizhu powder. “Shenling Baizhu powder SymMap” includes all herbal targets and combined targets. “Shenling Baizhu powder metabolomics” includes two-dimensional structural data analysis. “Molecular docking” involves molecule-target docking and the results. [file 4579850.f1.zip › Data in brief/2. Shenling Baizhu powder Metabolomics/2D structure/29.csv]

Target	Common name	Uniprot ID	ChEMBL ID	Target Class	Probability*	Known actives (3D/2D)
Cytochrome P450 19A1	CYP19A1	P11511	CHEMBL1978	Cytochrome P450	0.048952897826	167 / 29
Thromboxane-A synthase	TBXAS1	P24557	CHEMBL1835	Cytochrome P450	0.048952897826	16 / 0
Epoxide hydrolase 1	EPHX1	P07099	CHEMBL1968	Protease	0.048952897826	37 / 0
Androgen Receptor	AR	P10275	CHEMBL1871	Nuclear receptor	0.048952897826	29 / 55
Progesterone receptor	PGR	P06401	CHEMBL208	Nuclear receptor	0.048952897826	18 / 40
Cytochrome P450 11B2	CYP11B2	P19099	CHEMBL2722	Cytochrome P450	0.048952897826	116 / 0
Cytochrome P450 11B1	CYP11B1	P15538	CHEMBL1908	Cytochrome P450	0.048952897826	93 / 0
Tyrosine-protein kinase receptor FLT3	FLT3	P36888	CHEMBL1974	Kinase	0.048952897826	5 / 0
DNA-dependent protein kinase	PRKDC	P78527	CHEMBL3142	Kinase	0.048952897826	1 / 0
Kinesin-like protein 1	KIF11	P52732	CHEMBL4581	Other cytosolic protein	0.048952897826	3 / 0
Adrenergic receptor alpha-2	ADRA2C	P18825	CHEMBL1916	Family A G protein-coupled receptor	0.048952897826	8 / 0
Cathepsin K	CTSK	P43235	CHEMBL268	Protease	0.048952897826	50 / 0
Carbonic anhydrase III	CA3	P07451	CHEMBL2885	Lyase	0.048952897826	4 / 0
Carbonic anhydrase XII	CA12	O43570	CHEMBL3242	Lyase	0.048952897826	13 / 0
Carbonic anhydrase XIV	CA14	Q9ULX7	CHEMBL3510	Lyase	0.048952897826	6 / 0
Carbonic anhydrase IX	CA9	Q16790	CHEMBL3594	Lyase	0.048952897826	11 / 0
Carbonic anhydrase XIII (by homology)	CA13	Q8N1Q1	CHEMBL3912	Lyase	0.048952897826	6 / 0
Carbonic anhydrase VB	CA5B	Q9Y2D0	CHEMBL3969	Lyase	0.048952897826	5 / 0
Carbonic anhydrase VA	CA5A	P35218	CHEMBL4789	Lyase	0.048952897826	5 / 0
Cholesterol esterase	CEL	P19835	CHEMBL3219	Enzyme	0.048952897826	4 / 0
Thromboxane A2 receptor	TBXA2R	P21731	CHEMBL2069	Family A G protein-coupled receptor	0.048952897826	3 / 0
Exportin-1	XPO1	O14980	CHEMBL5661	Unclassified protein	0.048952897826	2 / 0
Potassium channel subfamily K member 2 (by homology)	KCNK2	O95069	CHEMBL2321615	Voltage-gated ion channel	0.048952897826	1 / 0
Tubulin--tyrosine ligase	TTL	Q8NG68	CHEMBL5549	Enzyme	0.048952897826	0 / 17
Muscarinic acetylcholine receptor M4	CHRM4	P08173	CHEMBL1821	Family A G protein-coupled receptor	0.048952897826	6 / 0
Muscarinic acetylcholine receptor M5	CHRM5	P08912	CHEMBL2035	Family A G protein-coupled receptor	0.048952897826	7 / 0
Muscarinic acetylcholine receptor M2	CHRM2	P08172	CHEMBL211	Family A G protein-coupled receptor	0.048952897826	23 / 0
Muscarinic acetylcholine receptor M1	CHRM1	P11229	CHEMBL216	Family A G protein-coupled receptor	0.048952897826	26 / 0
Muscarinic acetylcholine receptor M3	CHRM3	P20309	CHEMBL245	Family A G protein-coupled receptor	0.048952897826	10 / 0
Leucine-rich repeat serine/threonine-protein kinase 2	LRRK2	Q5S007	CHEMBL1075104	Kinase	0.048952897826	7 / 0
Kir3.1/Kir3.4	KCNJ5 KCNJ3	P48544 P48549	CHEMBL3038488	Voltage-gated ion channel	0.0	1 / 0
Thymidylate synthase	TYMS	P04818	CHEMBL1952	Transferase	0.0	5 / 0
Leukocyte elastase	ELANE	P08246	CHEMBL248	Protease	0.0	10 / 0
Poly [ADP-ribose] polymerase-1	PARP1	P09874	CHEMBL3105	Enzyme	0.0	22 / 0
Epoxide hydratase	EPHX2	P34913	CHEMBL2409	Protease	0.0	28 / 0
Leukocyte common antigen	PTPRC	P08575	CHEMBL3243	Enzyme	0.0	4 / 0
Receptor-type tyrosine-protein phosphatase F (LAR)	PTPRF	P10586	CHEMBL3521	Membrane receptor	0.0	2 / 0
Monoamine oxidase B	MAOB	P27338	CHEMBL2039	Oxidoreductase	0.0	66 / 0
MAP kinase p38 alpha	MAPK14	Q16539	CHEMBL260	Kinase	0.0	14 / 0
Myeloperoxidase	MPO	P05164	CHEMBL2439	Enzyme	0.0	6 / 0
Polyadenylate-binding protein 1	PABPC1	P11940	CHEMBL1293286	Unclassified protein	0.0	4 / 0
Steroid 5-alpha-reductase 1	SRD5A1	P18405	CHEMBL1787	Oxidoreductase	0.0	56 / 0
Estradiol 17-beta-dehydrogenase 3	HSD17B3	P37058	CHEMBL4234	Enzyme	0.0	17 / 0
Alcohol dehydrogenase alpha chain	ADH1A	P07327	CHEMBL1970	Oxidoreductase	0.0	10 / 0
PI3-kinase p110-delta/p85-alpha	PIK3CD PIK3R1	O00329 P27986	CHEMBL2111432	Enzyme	0.0	1 / 0
Aryl hydrocarbon receptor	AHR	P35869	CHEMBL3201	Transcription factor	0.0	1 / 0
Melatonin receptor 1A	MTNR1A	P48039	CHEMBL1945	Family A G protein-coupled receptor	0.0	23 / 0
Melatonin receptor 1B	MTNR1B	P49286	CHEMBL1946	Family A G protein-coupled receptor	0.0	17 / 0
Dopamine D4 receptor	DRD4	P21917	CHEMBL219	Family A G protein-coupled receptor	0.0	4 / 0
Vascular endothelial growth factor receptor 2	KDR	P35968	CHEMBL279	Kinase	0.0	7 / 0
Tyrosine-protein kinase JAK1	JAK1	P23458	CHEMBL2835	Kinase	0.0	15 / 0
Tyrosine-protein kinase JAK2	JAK2	O60674	CHEMBL2971	Kinase	0.0	22 / 0
Metabotropic glutamate receptor 5 (by homology)	GRM5	P41594	CHEMBL3227	Family C G protein-coupled receptor	0.0	36 / 0
Serine/threonine-protein kinase Aurora-A	AURKA	O14965	CHEMBL4722	Kinase	0.0	4 / 0
Tankyrase-2	TNKS2	Q9H2K2	CHEMBL6154	Enzyme	0.0	19 / 0
Tankyrase-1	TNKS	O95271	CHEMBL6164	Enzyme	0.0	5 / 0
RAS guanyl releasing protein 3	RASGRP3	Q8IV61	CHEMBL3638	Other cytosolic protein	0.0	0 / 1
Acetylcholinesterase	ACHE	P22303	CHEMBL220	Hydrolase	0.0	23 / 0
Geranylgeranyl transferase type I	PGGT1B FNTA	P53609 P49354	CHEMBL2095164	Enzyme	0.0	5 / 0
Tyrosine-protein kinase JAK3	JAK3	P52333	CHEMBL2148	Kinase	0.0	12 / 0
Beta-chymotrypsin	CTRB1	P17538	CHEMBL4796	Protease	0.0	4 / 0
Cytochrome P450 2A6	CYP2A6	P11509	CHEMBL5282	Cytochrome P450	0.0	12 / 0
Serotonin 2b (5-HT2b) receptor	HTR2B	P41595	CHEMBL1833	Family A G protein-coupled receptor	0.0	4 / 0
Tyrosine-protein kinase FYN	FYN	P06241	CHEMBL1841	Kinase	0.0	1 / 0
Alpha-2a adrenergic receptor	ADRA2A	P08913	CHEMBL1867	Family A G protein-coupled receptor	0.0	7 / 0
Alpha-2b adrenergic receptor	ADRA2B	P18089	CHEMBL1942	Family A G protein-coupled receptor	0.0	6 / 0
Bile acid receptor FXR	NR1H4	Q96RI1	CHEMBL2047	Nuclear receptor	0.0	1 / 0
Thrombin	F2	P00734	CHEMBL204	Protease	0.0	8 / 0
Trypsin I	PRSS1	P07477	CHEMBL209	Protease	0.0	7 / 0
Serotonin 2a (5-HT2a) receptor	HTR2A	P28223	CHEMBL224	Family A G protein-coupled receptor	0.0	3 / 0
Serotonin 2c (5-HT2c) receptor	HTR2C	P28335	CHEMBL225	Family A G protein-coupled receptor	0.0	4 / 0
Serotonin transporter	SLC6A4	P31645	CHEMBL228	Electrochemical transporter	0.0	14 / 0
Dopamine D3 receptor	DRD3	P35462	CHEMBL234	Family A G protein-coupled receptor	0.0	2 / 0
Adenosine A3 receptor	ADORA3	P0DMS8	CHEMBL256	Family A G protein-coupled receptor	0.0	2 / 0
Cytochrome P450 2D6	CYP2D6	P10635	CHEMBL289	Cytochrome P450	0.0	2 / 0
Cytochrome P450 1A2	CYP1A2	P05177	CHEMBL3356	Cytochrome P450	0.0	3 / 0
Cytochrome P450 2C9	CYP2C9	P11712	CHEMBL3397	Cytochrome P450	0.0	1 / 0
Cytochrome P450 3A4	CYP3A4	P08684	CHEMBL340	Cytochrome P450	0.0	1 / 0
Indoleamine 2,3-dioxygenase	IDO1	P14902	CHEMBL4685	Enzyme	0.0	11 / 0
Histone acetyltransferase PCAF	KAT2B	Q92831	CHEMBL5500	Writer	0.0	2 / 0
GABA-A receptor; alpha-5/beta-3/gamma-2	GABRB3 GABRG2 GABRA5	P28472 P18507 P31644	CHEMBL2094122	Ligand-gated ion channel	0.0	33 / 0
G-protein coupled receptor 55	GPR55	Q9Y2T6	CHEMBL1075322	Family A G protein-coupled receptor	0.0	1 / 0
Cyclooxygenase-1	PTGS1	P23219	CHEMBL221	Oxidoreductase	0.0	21 / 0
Cathepsin (H and K)	CTSH	P09668	CHEMBL2225	Protease	0.0	5 / 0
Cathepsin L	CTSL	P07711	CHEMBL3837	Protease	0.0	24 / 0
Cathepsin (B and K)	CTSB	P07858	CHEMBL4072	Protease	0.0	25 / 0
Protein-tyrosine phosphatase 1B	PTPN1	P18031	CHEMBL335	Phosphatase	0.0	7 / 10
Signal transducer and activator of transcription 3	STAT3	P40763	CHEMBL4026	Transcription factor	0.0	1 / 11
Macrophage-stimulating protein receptor	MST1R	Q04912	CHEMBL2689	Kinase	0.0	1 / 0
Heme oxygenase 1 (by homology)	HMOX1	P09601	CHEMBL2823	Enzyme	0.0	6 / 0
Cytochrome P450 17A1	CYP17A1	P05093	CHEMBL3522	Cytochrome P450	0.0	46 / 4
Phosphodiesterase 7A	PDE7A	Q13946	CHEMBL3012	Phosphodiesterase	0.0	31 / 0
Neuronal acetylcholine receptor; alpha4/beta2	CHRNA4 CHRNB2	P43681 P17787	CHEMBL1907589	Ligand-gated ion channel	0.0	4 / 0
Glutaminyl-peptide cyclotransferase	QPCT	Q16769	CHEMBL4508	Enzyme	0.0	5 / 0
Metabotropic glutamate receptor 2 (by homology)	GRM2	Q14416	CHEMBL5137	Family C G protein-coupled receptor	0.0	5 / 0
Platelet-derived growth factor receptor	PDGFRA PDGFRB	P16234 P09619	CHEMBL2095189	Kinase	0.0	7 / 0
Chymotrypsin C	CTRC	Q99895	CHEMBL2386	Protease	0.0	3 / 0
Metabotropic glutamate receptor 4	GRM4	Q14833	CHEMBL2736	Family C G protein-coupled receptor	0.0	6 / 0
Bromodomain-containing protein 9	BRD9	Q9H8M2	CHEMBL3108640	Reader	0.0	1 / 0
Alcohol dehydrogenase gamma chain	ADH1C	P00326	CHEMBL3285	Oxidoreductase	0.0	3 / 0
