# Supplementary material for: A Network Pharmacology-Based Study on Irritable Bowel Syndrome Prevention and Treatment Utilizing Shenling Baizhu Powder
Source: Biomed Res Int. 2021 Nov 23;2021:4579850. doi: 10.1155/2021/4579850 (PMC8632384; doi:10.1155/2021/4579850)
Supplement: Supplementary Materials — Please find detailed data in the supplementary file, including the original data of SymMap, metabolomics, and molecular docking of Shenling Baizhu powder. “Shenling Baizhu powder SymMap” includes all herbal targets and combined targets. “Shenling Baizhu powder metabolomics” includes two-dimensional structural data analysis. “Molecular docking” involves molecule-target docking and the results. [file 4579850.f1.zip › Data in brief/2. Shenling Baizhu powder Metabolomics/2D structure/30.csv]

Target	Common name	Uniprot ID	ChEMBL ID	Target Class	Probability*	Known actives (3D/2D)
Ribosomal protein S6 kinase alpha 5	RPS6KA5	O75582	CHEMBL4237	Kinase	0.071715932485	21 / 4
Phospholipase A2 group 1B	PLA2G1B	P04054	CHEMBL4426	Enzyme	0.071715932485	0 / 4
Potassium-transporting ATPase alpha chain 2	ATP12A	P54707	CHEMBL2933	Primary active transporter	0.0535560755162	0 / 9
Cytochrome P450 19A1	CYP19A1	P11511	CHEMBL1978	Cytochrome P450	0.0535560755162	200 / 37
Dual specificity phosphatase Cdc25A	CDC25A	P30304	CHEMBL3775	Phosphatase	0.0535560755162	2 / 13
Dual specificity phosphatase Cdc25B	CDC25B	P30305	CHEMBL4804	Phosphatase	0.0535560755162	4 / 11
Dopamine transporter (by homology)	SLC6A3	Q01959	CHEMBL238	Electrochemical transporter	0.0535560755162	115 / 0
Phospholipase A2 group IIA	PLA2G2A	P14555	CHEMBL3474	Enzyme	0.0535560755162	2 / 8
Tubulin--tyrosine ligase	TTL	Q8NG68	CHEMBL5549	Enzyme	0.0535560755162	0 / 14
Androgen Receptor	AR	P10275	CHEMBL1871	Nuclear receptor	0.0535560755162	96 / 51
Protein-tyrosine phosphatase 1B	PTPN1	P18031	CHEMBL335	Phosphatase	0.0535560755162	21 / 30
Progesterone receptor	PGR	P06401	CHEMBL208	Nuclear receptor	0.0535560755162	135 / 40
dCTP pyrophosphatase 1	DCTPP1	Q9H773	CHEMBL3769292	Enzyme	0.0535560755162	4 / 0
Serotonin transporter (by homology)	SLC6A4	P31645	CHEMBL228	Electrochemical transporter	0.0535560755162	49 / 0
Poly [ADP-ribose] polymerase-1	PARP1	P09874	CHEMBL3105	Enzyme	0.0535560755162	203 / 0
Norepinephrine transporter	SLC6A2	P23975	CHEMBL222	Electrochemical transporter	0.0535560755162	24 / 0
Sigma opioid receptor	SIGMAR1	Q99720	CHEMBL287	Membrane receptor	0.0535560755162	18 / 0
Taste receptor type 2 member 31	TAS2R31	P59538	CHEMBL2034804	Taste family G protein-coupled receptor	0.0535560755162	0 / 1
Cytochrome P450 51 (by homology)	CYP51A1	Q16850	CHEMBL3849	Cytochrome P450	0.0535560755162	4 / 0
Cyclin-dependent kinase 2	CDK2	P24941	CHEMBL301	Kinase	0.0535560755162	78 / 0
Fatty acid desaturase 1	FADS1	O60427	CHEMBL5840	Enzyme	0.0535560755162	8 / 0
Platelet-derived growth factor receptor beta	PDGFRB	P09619	CHEMBL1913	Kinase	0.0535560755162	48 / 0
Protein tyrosine kinase 2 beta	PTK2B	Q14289	CHEMBL5469	Kinase	0.0535560755162	12 / 0
P2X purinoceptor 7	P2RX7	Q99572	CHEMBL4805	Ligand-gated ion channel	0.0535560755162	135 / 0
Orexin receptor 2	HCRTR2	O43614	CHEMBL4792	Family A G protein-coupled receptor	0.0535560755162	89 / 0
Orexin receptor 1	HCRTR1	O43613	CHEMBL5113	Family A G protein-coupled receptor	0.0535560755162	76 / 0
Dual specificity mitogen-activated protein kinase kinase 1	MAP2K1	Q02750	CHEMBL3587	Kinase	0.0535560755162	13 / 0
Heme oxygenase 1 (by homology)	HMOX1	P09601	CHEMBL2823	Enzyme	0.0535560755162	37 / 0
MAP kinase ERK2	MAPK1	P28482	CHEMBL4040	Kinase	0.0535560755162	234 / 0
Adrenergic receptor alpha-2	ADRA2C	P18825	CHEMBL1916	Family A G protein-coupled receptor	0.0535560755162	12 / 0
Transthyretin	TTR	P02766	CHEMBL3194	Secreted protein	0.0535560755162	5 / 0
Cholecystokinin B receptor	CCKBR	P32239	CHEMBL298	Family A G protein-coupled receptor	0.0535560755162	11 / 0
Gamma-secretase	PSEN2 PSENEN NCSTN APH1A PSEN1 APH1B	P49810 Q9NZ42 Q92542 Q96BI3 P49768 Q8WW43	CHEMBL2094135	Protease	0.0535560755162	107 / 0
Peroxisome proliferator-activated receptor gamma	PPARG	P37231	CHEMBL235	Nuclear receptor	0.0	7 / 8
Leucine-rich repeat serine/threonine-protein kinase 2	LRRK2	Q5S007	CHEMBL1075104	Kinase	0.0	39 / 0
Muscarinic acetylcholine receptor M4	CHRM4	P08173	CHEMBL1821	Family A G protein-coupled receptor	0.0	7 / 0
Muscarinic acetylcholine receptor M2	CHRM2	P08172	CHEMBL211	Family A G protein-coupled receptor	0.0	10 / 0
p53-binding protein Mdm-2	MDM2	Q00987	CHEMBL5023	Other nuclear protein	0.0	33 / 0
Inosine-5'-monophosphate dehydrogenase 2	IMPDH2	P12268	CHEMBL2002	Oxidoreductase	0.0	64 / 0
Dual specificity phosphatase Cdc25C	CDC25C	P30307	CHEMBL2378	Phosphatase	0.0	0 / 4
Cyclin-dependent kinase 2/cyclin E	CCNE2 CDK2 CCNE1	O96020 P24941 P24864	CHEMBL2094126	Other cytosolic protein	0.0	49 / 0
Programmed cell death protein 4	PDCD4	Q53EL6	CHEMBL1781868	Unclassified protein	0.0	0 / 8
Glycogen synthase kinase-3 alpha	GSK3A	P49840	CHEMBL2850	Kinase	0.0	16 / 0
RAS guanyl releasing protein 3	RASGRP3	Q8IV61	CHEMBL3638	Other cytosolic protein	0.0	0 / 1
MAP kinase p38 alpha	MAPK14	Q16539	CHEMBL260	Kinase	0.0	189 / 0
Alpha-2a adrenergic receptor	ADRA2A	P08913	CHEMBL1867	Family A G protein-coupled receptor	0.0	12 / 0
Butyrylcholinesterase	BCHE	P06276	CHEMBL1914	Hydrolase	0.0	27 / 0
Alpha-2b adrenergic receptor	ADRA2B	P18089	CHEMBL1942	Family A G protein-coupled receptor	0.0	7 / 0
Phosphodiesterase 10A	PDE10A	Q9Y233	CHEMBL4409	Phosphodiesterase	0.0	117 / 0
Melatonin receptor 1A	MTNR1A	P48039	CHEMBL1945	Family A G protein-coupled receptor	0.0	232 / 0
Melatonin receptor 1B	MTNR1B	P49286	CHEMBL1946	Family A G protein-coupled receptor	0.0	199 / 0
Quinone reductase 2	NQO2	P16083	CHEMBL3959	Enzyme	0.0	26 / 0
Cyclin-dependent kinase 2/cyclin E1	CCNE1 CDK2	P24864 P24941	CHEMBL1907605	Kinase	0.0	21 / 0
CDC7/DBF4 (Cell division cycle 7-related protein kinase/Activator of S phase kinase)	DBF4 CDC7	Q9UBU7 O00311	CHEMBL2111377	Kinase	0.0	8 / 0
CDC7/DBF4 (Cell division cycle 7-related protein kinase/Activator of S phase kinase)	CDC7	O00311	CHEMBL5443	Kinase	0.0	19 / 0
Sodium/potassium-transporting ATPase alpha-1 chain	ATP1A1	P05023	CHEMBL1807	Primary active transporter	0.0	0 / 1
Inosine-5'-monophosphate dehydrogenase 1	IMPDH1	P20839	CHEMBL1822	Oxidoreductase	0.0	1 / 0
c-Jun N-terminal kinase 1	MAPK8	P45983	CHEMBL2276	Kinase	0.0	91 / 0
Dihydroorotate dehydrogenase	DHODH	Q02127	CHEMBL1966	Oxidoreductase	0.0	2 / 0
Serine/threonine-protein kinase Aurora-B	AURKB	Q96GD4	CHEMBL2185	Kinase	0.0	97 / 0
MAP kinase-activated protein kinase 2	MAPKAPK2	P49137	CHEMBL2208	Kinase	0.0	31 / 0
Casein kinase I gamma 1	CSNK1G1	Q9HCP0	CHEMBL2426	Kinase	0.0	2 / 0
Rho-associated protein kinase 2	ROCK2	O75116	CHEMBL2973	Kinase	0.0	50 / 0
Phosphodiesterase 2A	PDE2A	O00408	CHEMBL2652	Phosphodiesterase	0.0	10 / 0
Epoxide hydrolase 1	EPHX1	P07099	CHEMBL1968	Protease	0.0	21 / 0
Serine/threonine-protein kinase PIM1	PIM1	P11309	CHEMBL2147	Kinase	0.0	65 / 0
Serine/threonine-protein kinase PIM3	PIM3	Q86V86	CHEMBL5407	Kinase	0.0	20 / 0
Calcium sensing receptor	CASR	P41180	CHEMBL1878	Family C G protein-coupled receptor	0.0	14 / 0
Potassium channel subfamily K member 3	KCNK3	O14649	CHEMBL2321613	Voltage-gated ion channel	0.0	5 / 0
Potassium channel subfamily K member 9	KCNK9	Q9NPC2	CHEMBL2321614	Voltage-gated ion channel	0.0	2 / 0
C5a anaphylatoxin chemotactic receptor	C5AR1	P21730	CHEMBL2373	Family A G protein-coupled receptor	0.0	15 / 0
Tyrosine-protein kinase JAK1	JAK1	P23458	CHEMBL2835	Kinase	0.0	122 / 0
Tyrosine-protein kinase JAK2	JAK2	O60674	CHEMBL2971	Kinase	0.0	161 / 0
Cyclin-dependent kinase 1/cyclin B	CCNB3 CDK1 CCNB1 CCNB2	Q8WWL7 P06493 P14635 O95067	CHEMBL2094127	Other cytosolic protein	0.0	16 / 0
HERG	KCNH2	Q12809	CHEMBL240	Voltage-gated ion channel	0.0	26 / 0
Cyclin-dependent kinase 5/CDK5 activator 1	CDK5	Q00535	CHEMBL4036	Kinase	0.0	3 / 0
Ribosomal protein S6 kinase alpha 1	RPS6KA1	Q15418	CHEMBL2553	Kinase	0.0	6 / 0
Rho-associated protein kinase 1	ROCK1	Q13464	CHEMBL3231	Kinase	0.0	41 / 0
ALK tyrosine kinase receptor	ALK	Q9UM73	CHEMBL4247	Kinase	0.0	34 / 0
Ribosomal protein S6 kinase 1	RPS6KB1	P23443	CHEMBL4501	Kinase	0.0	119 / 0
Vascular endothelial growth factor receptor 1	FLT1	P17948	CHEMBL1868	Kinase	0.0	22 / 0
Cyclin-dependent kinase 2/cyclin A	CDK2 CCNA1 CCNA2	P24941 P78396 P20248	CHEMBL2094128	Other cytosolic protein	0.0	77 / 0
Adenosine A2a receptor	ADORA2A	P29274	CHEMBL251	Family A G protein-coupled receptor	0.0	120 / 0
Adenosine A2b receptor	ADORA2B	P29275	CHEMBL255	Family A G protein-coupled receptor	0.0	75 / 0
Vascular endothelial growth factor receptor 2	KDR	P35968	CHEMBL279	Kinase	0.0	206 / 0
Serine/threonine-protein kinase PIM2	PIM2	Q9P1W9	CHEMBL4523	Kinase	0.0	46 / 0
Peroxisome proliferator-activated receptor delta	PPARD	Q03181	CHEMBL3979	Nuclear receptor	0.0	0 / 3
Tyrosine-protein kinase LCK (by homology)	LCK	P06239	CHEMBL258	Kinase	0.0	36 / 0
Tyrosine-protein kinase SYK	SYK	P43405	CHEMBL2599	Kinase	0.0	56 / 0
Tyrosine-protein kinase Lyn	LYN	P07948	CHEMBL3905	Kinase	0.0	4 / 0
Voltage-gated potassium channel subunit Kv1.5	KCNA5	P22460	CHEMBL4306	Voltage-gated ion channel	0.0	75 / 0
Tyrosine-protein kinase TXK	TXK	P42681	CHEMBL4367	Kinase	0.0	3 / 0
Tyrosine-protein kinase BTK	BTK	Q06187	CHEMBL5251	Kinase	0.0	7 / 0
Adenosine A3 receptor	ADORA3	P0DMS8	CHEMBL256	Family A G protein-coupled receptor	0.0	43 / 0
Hormone sensitive lipase	LIPE	Q05469	CHEMBL3590	Enzyme	0.0	4 / 0
Fatty acid transport protein 4	SLC27A4	Q6P1M0	CHEMBL4327	Electrochemical transporter	0.0	14 / 0
Epidermal growth factor receptor erbB1	EGFR	P00533	CHEMBL203	Kinase	0.0	139 / 0
Serotonin 2c (5-HT2c) receptor	HTR2C	P28335	CHEMBL225	Family A G protein-coupled receptor	0.0	20 / 0
Transient receptor potential cation channel subfamily V member 3	TRPV3	Q8NET8	CHEMBL5522	Voltage-gated ion channel	0.0	1 / 0
Dual-specificity tyrosine-phosphorylation regulated kinase 1A	DYRK1A	Q13627	CHEMBL2292	Kinase	0.0	26 / 0
