# Supplementary material for: A Network Pharmacology-Based Study on Irritable Bowel Syndrome Prevention and Treatment Utilizing Shenling Baizhu Powder
Source: Biomed Res Int. 2021 Nov 23;2021:4579850. doi: 10.1155/2021/4579850 (PMC8632384; doi:10.1155/2021/4579850)
Supplement: Supplementary Materials — Please find detailed data in the supplementary file, including the original data of SymMap, metabolomics, and molecular docking of Shenling Baizhu powder. “Shenling Baizhu powder SymMap” includes all herbal targets and combined targets. “Shenling Baizhu powder metabolomics” includes two-dimensional structural data analysis. “Molecular docking” involves molecule-target docking and the results. [file 4579850.f1.zip › Data in brief/2. Shenling Baizhu powder Metabolomics/2D structure/32.csv]

Target	Common name	Uniprot ID	ChEMBL ID	Target Class	Probability*	Known actives (3D/2D)
Aldose reductase	AKR1B1	P15121	CHEMBL1900	Enzyme	1.0	35 / 42
Neuronal acetylcholine receptor protein alpha-7 subunit	CHRNA7	P36544	CHEMBL2492	Ligand-gated ion channel	0.677770377193	7 / 11
Epidermal growth factor receptor erbB1	EGFR	P00533	CHEMBL203	Kinase	0.355612865013	58 / 17
Coagulation factor VII/tissue factor	F3	P13726	CHEMBL4081	Surface antigen	0.300567521946	10 / 8
Monoamine oxidase B	MAOB	P27338	CHEMBL2039	Oxidoreductase	0.292767343994	19 / 106
Beta amyloid A4 protein	APP	P05067	CHEMBL2487	Membrane receptor	0.206337196811	18 / 16
Telomerase reverse transcriptase	TERT	O14746	CHEMBL2916	Enzyme	0.198443988437	8 / 2
Cytochrome P450 19A1	CYP19A1	P11511	CHEMBL1978	Cytochrome P450	0.190591873325	21 / 29
Monoamine oxidase A	MAOA	P21397	CHEMBL1951	Oxidoreductase	0.174862804543	15 / 31
Beta-secretase 1	BACE1	P56817	CHEMBL4822	Protease	0.167041662364	57 / 33
Aldehyde dehydrogenase	ALDH2	P05091	CHEMBL1935	Oxidoreductase	0.159189344372	0 / 1
ATP-binding cassette sub-family G member 2	ABCG2	Q9UNQ0	CHEMBL5393	Primary active transporter	0.135616202575	4 / 50
Voltage-gated potassium channel subunit Kv1.3	KCNA3	P22001	CHEMBL4633	Voltage-gated ion channel	0.135616202575	0 / 8
Nitric oxide synthase, inducible	NOS2	P35228	CHEMBL4481	Enzyme	0.127750341333	16 / 10
Alpha-synuclein	SNCA	P37840	CHEMBL6152	Unclassified protein	0.127750341333	25 / 3
Cyclooxygenase-2	PTGS2	P35354	CHEMBL230	Oxidoreductase	0.119895126898	32 / 15
Arachidonate 5-lipoxygenase	ALOX5	P09917	CHEMBL215	Oxidoreductase	0.119895126898	53 / 31
3-phosphoinositide dependent protein kinase-1	PDPK1	O15530	CHEMBL2534	Kinase	0.112041901328	4 / 1
Estrogen receptor alpha	ESR1	P03372	CHEMBL206	Nuclear receptor	0.112041901328	289 / 67
Estrogen receptor beta	ESR2	Q92731	CHEMBL242	Nuclear receptor	0.112041901328	263 / 54
Dual-specificity tyrosine-phosphorylation regulated kinase 1A	DYRK1A	Q13627	CHEMBL2292	Kinase	0.112041901328	43 / 0
17-beta-hydroxysteroid dehydrogenase 14	HSD17B14	Q9BPX1	CHEMBL3712868	Enzyme	0.112041901328	1 / 0
Dual specificty protein kinase CLK1	CLK1	P49759	CHEMBL4224	Kinase	0.112041901328	22 / 0
Dual specificity tyrosine-phosphorylation-regulated kinase 1B	DYRK1B	Q9Y463	CHEMBL5543	Kinase	0.112041901328	19 / 0
Estradiol 17-beta-dehydrogenase 1	HSD17B1	P14061	CHEMBL3181	Enzyme	0.112041901328	131 / 0
Tubulin beta-1 chain	TUBB1	Q9H4B7	CHEMBL1915	Structural protein	0.112041901328	0 / 15
Microtubule-associated protein tau	MAPT	P10636	CHEMBL1293224	Unclassified protein	0.112041901328	3 / 1
Estradiol 17-beta-dehydrogenase 2	HSD17B2	P37059	CHEMBL2789	Enzyme	0.112041901328	123 / 0
Multidrug resistance-associated protein 1	ABCC1	P33527	CHEMBL3004	Primary active transporter	0.112041901328	3 / 0
Testis-specific androgen-binding protein	SHBG	P04278	CHEMBL3305	Secreted protein	0.112041901328	2 / 0
Cytochrome P450 1B1	CYP1B1	Q16678	CHEMBL4878	Cytochrome P450	0.112041901328	5 / 0
Carbonyl reductase [NADPH] 1	CBR1	P16152	CHEMBL5586	Enzyme	0.112041901328	2 / 0
Tyrosinase	TYR	P14679	CHEMBL1973	Oxidoreductase	0.112041901328	4 / 0
Insulin receptor	INSR	P06213	CHEMBL1981	Kinase	0.112041901328	5 / 0
Insulin-like growth factor I receptor	IGF1R	P08069	CHEMBL1957	Kinase	0.112041901328	19 / 1
Aldo-keto-reductase family 1 member C3	AKR1C3	P42330	CHEMBL4681	Enzyme	0.112041901328	0 / 3
Arachidonate 15-lipoxygenase	ALOX15	P16050	CHEMBL2903	Enzyme	0.112041901328	23 / 0
P-glycoprotein 1	ABCB1	P08183	CHEMBL4302	Primary active transporter	0.112041901328	3 / 17
NADPH oxidase 4	NOX4	Q9NPH5	CHEMBL1250375	Enzyme	0.112041901328	7 / 0
Zinc finger protein GLI2	GLI2	P10070	CHEMBL5119	Transcription factor	0.112041901328	1 / 0
Zinc finger protein GLI1	GLI1	P08151	CHEMBL5461	Transcription factor	0.112041901328	1 / 0
Thymidylate synthase (by homology)	TYMS	P04818	CHEMBL1952	Transferase	0.112041901328	26 / 0
Tyrosine-protein kinase ABL	ABL1	P00519	CHEMBL1862	Kinase	0.112041901328	20 / 0
Platelet-derived growth factor receptor beta	PDGFRB	P09619	CHEMBL1913	Kinase	0.112041901328	5 / 0
Tyrosine-protein kinase receptor FLT3	FLT3	P36888	CHEMBL1974	Kinase	0.112041901328	8 / 0
Histone deacetylase 8	HDAC8	Q9BY41	CHEMBL3192	Eraser	0.112041901328	99 / 0
Estrogen-related receptor beta	ESRRB	O95718	CHEMBL3751	Nuclear receptor	0.112041901328	18 / 0
Serine/threonine-protein kinase/endoribonuclease IRE1	ERN1	O75460	CHEMBL1163101	Enzyme	0.112041901328	18 / 0
Cyclooxygenase-1	PTGS1	P23219	CHEMBL221	Oxidoreductase	0.112041901328	16 / 18
Fibroblast growth factor receptor 1	FGFR1	P11362	CHEMBL3650	Kinase	0.112041901328	6 / 0
Hepatocyte growth factor receptor	MET	P08581	CHEMBL3717	Kinase	0.112041901328	33 / 0
Serine/threonine-protein kinase Chk1	CHEK1	O14757	CHEMBL4630	Kinase	0.112041901328	83 / 0
Serine/threonine-protein kinase WEE1	WEE1	P30291	CHEMBL5491	Kinase	0.112041901328	80 / 0
Ribosomal protein S6 kinase 1	RPS6KB1	P23443	CHEMBL4501	Kinase	0.112041901328	17 / 0
Cathepsin L	CTSL	P07711	CHEMBL3837	Protease	0.112041901328	5 / 5
Dual specificity protein phosphatase 3	DUSP3	P51452	CHEMBL2635	Phosphatase	0.112041901328	2 / 0
Calpain 1	CAPN1	P07384	CHEMBL3891	Protease	0.112041901328	12 / 0
Apoptosis regulator Bcl-X	BCL2L1	Q07817	CHEMBL4625	Other ion channel	0.112041901328	3 / 0
DNA topoisomerase I	TOP1	P11387	CHEMBL1781	Isomerase	0.112041901328	5 / 0
Transitional endoplasmic reticulum ATPase	VCP	P55072	CHEMBL1075145	Primary active transporter	0.112041901328	4 / 0
14-3-3 protein gamma	YWHAG	P61981	CHEMBL1293296	Unclassified protein	0.112041901328	1 / 0
Hematopoietic prostaglandin D synthase	HPGDS	O60760	CHEMBL5879	Transferase	0.112041901328	2 / 0
5-lipoxygenase activating protein	ALOX5AP	P20292	CHEMBL4550	Other cytosolic protein	0.112041901328	95 / 0
Dihydroorotate dehydrogenase	DHODH	Q02127	CHEMBL1966	Oxidoreductase	0.112041901328	0 / 1
Adenylate cyclase type V	ADCY5	O95622	CHEMBL3189	Enzyme	0.112041901328	6 / 0
Acetylcholinesterase	ACHE	P22303	CHEMBL220	Hydrolase	0.112041901328	5 / 41
Toll-like receptor (TLR7/TLR9)	TLR9	Q9NR96	CHEMBL5804	Toll-like and Il-1 receptors	0.112041901328	2 / 6
Pyruvate dehydrogenase kinase isoform 1	PDK1	Q15118	CHEMBL4766	Kinase	0.112041901328	131 / 0
Cyclin-dependent kinase 1/cyclin B1	CDK1 CCNB1	P06493 P14635	CHEMBL1907602	Other cytosolic protein	0.112041901328	1 / 0
Cyclin-dependent kinase 2/cyclin E1	CCNE1 CDK2	P24864 P24941	CHEMBL1907605	Kinase	0.112041901328	2 / 0
CDK3/Cyclin E	CCNE1 CDK3	P24864 Q00526	CHEMBL3038471	Kinase	0.112041901328	2 / 0
G-protein coupled receptor kinase 2	GRK2	P25098	CHEMBL4079	Kinase	0.112041901328	2 / 0
Dynamin-1	DNM1	Q05193	CHEMBL4958	Enzyme	0.112041901328	5 / 0
Histone deacetylase 3	HDAC3	O15379	CHEMBL1829	Eraser	0.112041901328	62 / 0
Histone deacetylase 6	HDAC6	Q9UBN7	CHEMBL1865	Eraser	0.112041901328	133 / 0
Histone deacetylase 5	HDAC5	Q9UQL6	CHEMBL2563	Eraser	0.112041901328	12 / 0
Histone deacetylase 1	HDAC1	Q13547	CHEMBL325	Eraser	0.112041901328	167 / 0
ADAM17	ADAM17	P78536	CHEMBL3706	Protease	0.112041901328	76 / 0
Protein-tyrosine phosphatase 1B	PTPN1	P18031	CHEMBL335	Phosphatase	0.112041901328	12 / 36
Serine/threonine-protein kinase PLK1	PLK1	P53350	CHEMBL3024	Kinase	0.112041901328	4 / 0
Serine/threonine-protein kinase RAF	RAF1	P04049	CHEMBL1906	Kinase	0.112041901328	77 / 0
Serine/threonine-protein kinase B-raf	BRAF	P15056	CHEMBL5145	Kinase	0.112041901328	96 / 0
Insulin-like growth factor binding protein 3	IGFBP3	P17936	CHEMBL3997	Secreted protein	0.0	1 / 0
11-beta-hydroxysteroid dehydrogenase 1	HSD11B1	P28845	CHEMBL4235	Enzyme	0.0	29 / 5
Cyclin-dependent kinase 4	CDK4	P11802	CHEMBL331	Kinase	0.0	15 / 0
Serine/threonine-protein kinase PIM1	PIM1	P11309	CHEMBL2147	Kinase	0.0	10 / 0
Dual-specificity tyrosine-phosphorylation regulated kinase 2	DYRK2	Q92630	CHEMBL4376	Kinase	0.0	7 / 0
C-X-C chemokine receptor type 4	CXCR4	P61073	CHEMBL2107	Family A G protein-coupled receptor	0.0	0 / 1
Alkaline phosphatase, tissue-nonspecific isozyme	ALPL	P05186	CHEMBL5979	Enzyme	0.0	5 / 0
Matrix metalloproteinase 3	MMP3	P08254	CHEMBL283	Protease	0.0	68 / 0
Cyclin-dependent kinase 1	CDK1	P06493	CHEMBL308	Kinase	0.0	13 / 0
Rho-associated protein kinase 1	ROCK1	Q13464	CHEMBL3231	Kinase	0.0	12 / 0
Mitogen-activated protein kinase kinase kinase kinase 4	MAP4K4	O95819	CHEMBL6166	Kinase	0.0	11 / 0
Serine/threonine-protein kinase Chk2	CHEK2	O96017	CHEMBL2527	Kinase	0.0	6 / 0
Tyrosine-protein kinase LCK	LCK	P06239	CHEMBL258	Kinase	0.0	26 / 20
Dihydrofolate reductase	DHFR	P00374	CHEMBL202	Oxidoreductase	0.0	80 / 0
Matrix metalloproteinase 8	MMP8	P22894	CHEMBL4588	Protease	0.0	68 / 0
PI3-kinase p110-gamma subunit	PIK3CG	P48736	CHEMBL3267	Enzyme	0.0	21 / 0
Bone morphogenetic protein 1	BMP1	P13497	CHEMBL3898	Protease	0.0	40 / 0
Matrix metalloproteinase 12	MMP12	P39900	CHEMBL4393	Protease	0.0	16 / 0
