# Supplementary material for: A Network Pharmacology-Based Study on Irritable Bowel Syndrome Prevention and Treatment Utilizing Shenling Baizhu Powder
Source: Biomed Res Int. 2021 Nov 23;2021:4579850. doi: 10.1155/2021/4579850 (PMC8632384; doi:10.1155/2021/4579850)
Supplement: Supplementary Materials — Please find detailed data in the supplementary file, including the original data of SymMap, metabolomics, and molecular docking of Shenling Baizhu powder. “Shenling Baizhu powder SymMap” includes all herbal targets and combined targets. “Shenling Baizhu powder metabolomics” includes two-dimensional structural data analysis. “Molecular docking” involves molecule-target docking and the results. [file 4579850.f1.zip › Data in brief/2. Shenling Baizhu powder Metabolomics/2D structure/33.csv]

Target	Common name	Uniprot ID	ChEMBL ID	Target Class	Probability*	Known actives (3D/2D)
Monoamine oxidase B	MAOB	P27338	CHEMBL2039	Oxidoreductase	0.159189344372	38 / 20
Dynamin-1	DNM1	Q05193	CHEMBL4958	Enzyme	0.127750341333	0 / 14
Acetylcholinesterase	ACHE	P22303	CHEMBL220	Hydrolase	0.127750341333	38 / 25
Epidermal growth factor receptor erbB1	EGFR	P00533	CHEMBL203	Kinase	0.119895126898	99 / 64
C-C chemokine receptor type 2	CCR2	P41597	CHEMBL4015	Family A G protein-coupled receptor	0.112041901328	0 / 44
Cyclooxygenase-2	PTGS2	P35354	CHEMBL230	Oxidoreductase	0.112041901328	3 / 42
Butyrylcholinesterase	BCHE	P06276	CHEMBL1914	Hydrolase	0.112041901328	7 / 21
Matrix metalloproteinase 2	MMP2	P08253	CHEMBL333	Protease	0.112041901328	29 / 76
Matrix metalloproteinase 1	MMP1	P03956	CHEMBL332	Protease	0.112041901328	24 / 63
Serine/threonine-protein kinase WEE1	WEE1	P30291	CHEMBL5491	Kinase	0.112041901328	8 / 0
Myeloperoxidase	MPO	P05164	CHEMBL2439	Enzyme	0.112041901328	3 / 0
Serine/threonine-protein kinase Chk1	CHEK1	O14757	CHEMBL4630	Kinase	0.112041901328	208 / 0
MAP kinase-activated protein kinase 2	MAPKAPK2	P49137	CHEMBL2208	Kinase	0.112041901328	80 / 0
Ribosomal protein S6 kinase alpha 3	RPS6KA3	P51812	CHEMBL2345	Kinase	0.112041901328	7 / 0
Aldehyde dehydrogenase	ALDH2	P05091	CHEMBL1935	Oxidoreductase	0.112041901328	1 / 0
Lysine-specific demethylase 4D-like	KDM4E	B2RXH2	CHEMBL1293226	Eraser	0.112041901328	3 / 0
Lysine-specific demethylase 2A	KDM2A	Q9Y2K7	CHEMBL1938210	Eraser	0.112041901328	2 / 0
Egl nine homolog 1	EGLN1	Q9GZT9	CHEMBL5697	Oxidoreductase	0.112041901328	1 / 0
Lysine-specific demethylase 4C	KDM4C	Q9H3R0	CHEMBL6175	Eraser	0.112041901328	4 / 0
Arachidonate 5-lipoxygenase	ALOX5	P09917	CHEMBL215	Oxidoreductase	0.112041901328	0 / 28
Poly [ADP-ribose] polymerase-1	PARP1	P09874	CHEMBL3105	Enzyme	0.112041901328	145 / 0
Matrix metalloproteinase 9	MMP9	P14780	CHEMBL321	Protease	0.112041901328	21 / 65
Protein arginine N-methyltransferase 6	PRMT6	Q96LA8	CHEMBL1275221	Writer	0.112041901328	13 / 0
Tyrosine-protein kinase ABL	ABL1	P00519	CHEMBL1862	Kinase	0.112041901328	36 / 0
Serine/threonine-protein kinase Chk2	CHEK2	O96017	CHEMBL2527	Kinase	0.112041901328	14 / 0
Protein arginine N-methyltransferase 8	PRMT8	Q9NR22	CHEMBL3108648	Writer	0.112041901328	13 / 0
Protein-arginine N-methyltransferase 1	PRMT1	Q99873	CHEMBL5524	Writer	0.112041901328	12 / 0
Plasma kallikrein	KLKB1	P03952	CHEMBL2000	Protease	0.112041901328	19 / 0
Cyclin-dependent kinase 2	CDK2	P24941	CHEMBL301	Kinase	0.112041901328	68 / 0
Inhibitor of nuclear factor kappa B kinase beta subunit	IKBKB	O14920	CHEMBL1991	Kinase	0.112041901328	93 / 0
Tyrosine-protein kinase SYK	SYK	P43405	CHEMBL2599	Kinase	0.112041901328	189 / 0
Dopamine D2 receptor	DRD2	P14416	CHEMBL217	Family A G protein-coupled receptor	0.112041901328	94 / 79
Kynurenine/alpha-aminoadipate aminotransferase, mitochondrial	AADAT	Q8N5Z0	CHEMBL2046259	Enzyme	0.112041901328	16 / 0
Casein kinase II alpha	CSNK2A1	P68400	CHEMBL3629	Kinase	0.112041901328	12 / 0
Casein kinase II alpha (prime)	CSNK2A2	P19784	CHEMBL4070	Kinase	0.112041901328	10 / 0
6-phosphofructo-2-kinase/fructose-2,6-bisphosphatase 3	PFKFB3	Q16875	CHEMBL2331053	Enzyme	0.112041901328	17 / 0
Tyrosine-protein kinase ZAP-70	ZAP70	P43403	CHEMBL2803	Kinase	0.112041901328	29 / 0
Dopamine D3 receptor	DRD3	P35462	CHEMBL234	Family A G protein-coupled receptor	0.112041901328	26 / 72
Inhibitor of NF-kappa-B kinase (IKK)	CHUK	O15111	CHEMBL3476	Kinase	0.112041901328	52 / 0
Rho-associated protein kinase 2	ROCK2	O75116	CHEMBL2973	Kinase	0.112041901328	179 / 0
Protein kinase C theta	PRKCQ	Q04759	CHEMBL3920	Kinase	0.112041901328	82 / 0
Dihydropteridine reductase	QDPR	P09417	CHEMBL3730	Enzyme	0.112041901328	0 / 8
Ribosomal protein S6 kinase alpha 1	RPS6KA1	Q15418	CHEMBL2553	Kinase	0.112041901328	9 / 0
CaM kinase II	CAMK2D	Q13557	CHEMBL2801	Kinase	0.112041901328	33 / 0
MAP kinase signal-integrating kinase 2	MKNK2	Q9HBH9	CHEMBL4204	Kinase	0.112041901328	19 / 0
Ribosomal protein S6 kinase alpha 5	RPS6KA5	O75582	CHEMBL4237	Kinase	0.112041901328	12 / 0
Melatonin receptor 1A	MTNR1A	P48039	CHEMBL1945	Family A G protein-coupled receptor	0.112041901328	1 / 23
Melatonin receptor 1B	MTNR1B	P49286	CHEMBL1946	Family A G protein-coupled receptor	0.112041901328	1 / 22
Serine/threonine-protein kinase AKT	AKT3	Q9Y243	CHEMBL4816	Kinase	0.112041901328	43 / 0
Kinesin-like protein 1	KIF11	P52732	CHEMBL4581	Other cytosolic protein	0.112041901328	49 / 0
PDZ-binding kinase	PBK	Q96KB5	CHEMBL4896	Kinase	0.112041901328	62 / 0
Protein kinase C beta	PRKCB	P05771	CHEMBL3045	Kinase	0.112041901328	25 / 0
Interleukin-1 receptor-associated kinase 1	IRAK1	P51617	CHEMBL3357	Kinase	0.112041901328	6 / 0
Interleukin-1 receptor-associated kinase 4	IRAK4	Q9NWZ3	CHEMBL3778	Kinase	0.112041901328	60 / 0
Maternal embryonic leucine zipper kinase	MELK	Q14680	CHEMBL4578	Kinase	0.112041901328	101 / 0
Bromodomain-containing protein 4	BRD4	O60885	CHEMBL1163125	Reader	0.112041901328	28 / 0
ATPase family AAA domain-containing protein 2	ATAD2	Q6PL18	CHEMBL2150837	Reader	0.112041901328	18 / 0
Amine oxidase, copper containing	AOC3	Q16853	CHEMBL3437	Enzyme	0.112041901328	16 / 0
Dual specificity mitogen-activated protein kinase kinase 1	MAP2K1	Q02750	CHEMBL3587	Kinase	0.112041901328	6 / 0
Rho-associated protein kinase 1	ROCK1	Q13464	CHEMBL3231	Kinase	0.112041901328	76 / 0
Histone acetyltransferase p300	EP300	Q09472	CHEMBL3784	Writer	0.112041901328	0 / 11
Cyclin-dependent kinase 1/cyclin B	CCNB3 CDK1 CCNB1 CCNB2	Q8WWL7 P06493 P14635 O95067	CHEMBL2094127	Other cytosolic protein	0.112041901328	9 / 0
Tyrosyl-DNA phosphodiesterase 1	TDP1	Q9NUW8	CHEMBL1075138	Enzyme	0.112041901328	4 / 0
Serotonin 4 (5-HT4) receptor	HTR4	Q13639	CHEMBL1875	Family A G protein-coupled receptor	0.112041901328	18 / 0
Tyrosine-protein kinase FRK	FRK	P42685	CHEMBL4223	Kinase	0.112041901328	3 / 0
Tyrosine-protein kinase TXK	TXK	P42681	CHEMBL4367	Kinase	0.112041901328	5 / 0
Tyrosine-protein kinase FGR	FGR	P09769	CHEMBL4454	Kinase	0.112041901328	4 / 0
Tyrosine-protein kinase BRK	PTK6	Q13882	CHEMBL4601	Kinase	0.112041901328	5 / 0
Ephrin type-A receptor 1	EPHA1	P21709	CHEMBL5810	Kinase	0.112041901328	3 / 0
Methionine aminopeptidase 2	METAP2	P50579	CHEMBL3922	Protease	0.112041901328	7 / 15
Histamine H4 receptor	HRH4	Q9H3N8	CHEMBL3759	Family A G protein-coupled receptor	0.112041901328	60 / 0
Matrix metalloproteinase 3	MMP3	P08254	CHEMBL283	Protease	0.112041901328	25 / 0
Heat shock protein HSP 90-alpha	HSP90AA1	P07900	CHEMBL3880	Other cytosolic protein	0.112041901328	13 / 0
Cyclin-dependent kinase 1/cyclin B1	CDK1 CCNB1	P06493 P14635	CHEMBL1907602	Other cytosolic protein	0.112041901328	25 / 0
Bone morphogenetic protein 1	BMP1	P13497	CHEMBL3898	Protease	0.112041901328	2 / 0
Lysyl-tRNA synthetase	KARS	Q15046	CHEMBL5575	Enzyme	0.112041901328	19 / 0
3-phosphoinositide dependent protein kinase-1	PDPK1	O15530	CHEMBL2534	Kinase	0.112041901328	38 / 0
Serine/threonine-protein kinase Nek1	NEK1	Q96PY6	CHEMBL5855	Kinase	0.112041901328	78 / 0
Protein-glutamine gamma-glutamyltransferase	TGM2	P21980	CHEMBL2730	Enzyme	0.112041901328	3 / 0
Cyclin-dependent kinase 2/cyclin A	CDK2 CCNA1 CCNA2	P24941 P78396 P20248	CHEMBL2094128	Other cytosolic protein	0.112041901328	30 / 0
Cyclin-dependent kinase 1	CDK1	P06493	CHEMBL308	Kinase	0.112041901328	53 / 0
Tyrosine-protein kinase TYK2	TYK2	P29597	CHEMBL3553	Kinase	0.112041901328	12 / 0
Dipeptidyl peptidase VIII	DPP8	Q6V1X1	CHEMBL4657	Protease	0.0	81 / 0
Dipeptidyl peptidase IX	DPP9	Q86TI2	CHEMBL4793	Protease	0.0	73 / 0
Mitogen-activated protein kinase kinase kinase 5	MAP3K5	Q99683	CHEMBL5285	Kinase	0.0	3 / 0
Cyclin-dependent kinase 2/cyclin E1	CCNE1 CDK2	P24864 P24941	CHEMBL1907605	Kinase	0.0	22 / 0
c-Jun N-terminal kinase 1	MAPK8	P45983	CHEMBL2276	Kinase	0.0	17 / 0
Serine/threonine-protein kinase mTOR	MTOR	P42345	CHEMBL2842	Kinase	0.0	79 / 0
c-Jun N-terminal kinase 2	MAPK9	P45984	CHEMBL4179	Kinase	0.0	8 / 0
ALK tyrosine kinase receptor	ALK	Q9UM73	CHEMBL4247	Kinase	0.0	20 / 0
Neuropeptide Y receptor type 1	NPY1R	P25929	CHEMBL4777	Family A G protein-coupled receptor	0.0	12 / 0
Gamma-amino-N-butyrate transaminase (by homology)	ABAT	P80404	CHEMBL2044	Transferase	0.0	10 / 0
PI3-kinase p110-delta subunit	PIK3CD	O00329	CHEMBL3130	Enzyme	0.0	25 / 0
DNA-dependent protein kinase	PRKDC	P78527	CHEMBL3142	Kinase	0.0	19 / 0
PI3-kinase p110-beta subunit	PIK3CB	P42338	CHEMBL3145	Enzyme	0.0	26 / 0
Tyrosine-protein kinase HCK	HCK	P08631	CHEMBL3234	Kinase	0.0	18 / 0
Ribosomal protein S6 kinase 1	RPS6KB1	P23443	CHEMBL4501	Kinase	0.0	54 / 0
Ephrin receptor	EPHB4	P54760	CHEMBL5147	Kinase	0.0	11 / 0
Tyrosine-protein kinase JAK3	JAK3	P52333	CHEMBL2148	Kinase	0.0	49 / 0
Tyrosine-protein kinase JAK2	JAK2	O60674	CHEMBL2971	Kinase	0.0	75 / 0
