# Supplementary material for: A Network Pharmacology-Based Study on Irritable Bowel Syndrome Prevention and Treatment Utilizing Shenling Baizhu Powder
Source: Biomed Res Int. 2021 Nov 23;2021:4579850. doi: 10.1155/2021/4579850 (PMC8632384; doi:10.1155/2021/4579850)
Supplement: Supplementary Materials — Please find detailed data in the supplementary file, including the original data of SymMap, metabolomics, and molecular docking of Shenling Baizhu powder. “Shenling Baizhu powder SymMap” includes all herbal targets and combined targets. “Shenling Baizhu powder metabolomics” includes two-dimensional structural data analysis. “Molecular docking” involves molecule-target docking and the results. [file 4579850.f1.zip › Data in brief/2. Shenling Baizhu powder Metabolomics/2D structure/34.csv]

Target	Common name	Uniprot ID	ChEMBL ID	Target Class	Probability*	Known actives (3D/2D)
Aldehyde dehydrogenase	ALDH2	P05091	CHEMBL1935	Oxidoreductase	0.338110309869	12 / 44
Estradiol 17-beta-dehydrogenase 2	HSD17B2	P37059	CHEMBL2789	Enzyme	0.338110309869	72 / 3
Estrogen receptor alpha	ESR1	P03372	CHEMBL206	Nuclear receptor	0.329868485421	88 / 73
Interleukin-2	IL2	P60568	CHEMBL5880	Secreted protein	0.239574695827	0 / 4
Carbonic anhydrase XII	CA12	O43570	CHEMBL3242	Lyase	0.231637184894	139 / 34
Carbonic anhydrase VII	CA7	P43166	CHEMBL2326	Lyase	0.223449266359	29 / 22
Cytochrome P450 19A1	CYP19A1	P11511	CHEMBL1978	Cytochrome P450	0.223449266359	33 / 28
Epidermal growth factor receptor erbB1	EGFR	P00533	CHEMBL203	Kinase	0.215238178243	153 / 26
Estradiol 17-beta-dehydrogenase 1	HSD17B1	P14061	CHEMBL3181	Enzyme	0.215238178243	72 / 4
Estrogen receptor beta	ESR2	Q92731	CHEMBL242	Nuclear receptor	0.198833760448	84 / 58
Carbonic anhydrase IV	CA4	P22748	CHEMBL3729	Lyase	0.182484828777	13 / 13
ATP-binding cassette sub-family G member 2	ABCG2	Q9UNQ0	CHEMBL5393	Primary active transporter	0.17427075329	43 / 40
Cyclooxygenase-1	PTGS1	P23219	CHEMBL221	Oxidoreductase	0.17427075329	16 / 1
6-phosphofructo-2-kinase/fructose-2,6-bisphosphatase 3	PFKFB3	Q16875	CHEMBL2331053	Enzyme	0.157929217109	22 / 2
Serotonin 2a (5-HT2a) receptor	HTR2A	P28223	CHEMBL224	Family A G protein-coupled receptor	0.149732593856	44 / 3
Adenosine A1 receptor	ADORA1	P30542	CHEMBL226	Family A G protein-coupled receptor	0.149732593856	114 / 19
Adenosine A2a receptor	ADORA2A	P29274	CHEMBL251	Family A G protein-coupled receptor	0.149732593856	80 / 14
Macrophage migration inhibitory factor	MIF	P14174	CHEMBL2085	Enzyme	0.149732593856	22 / 8
Monoamine oxidase A	MAOA	P21397	CHEMBL1951	Oxidoreductase	0.141522086267	47 / 70
Monoamine oxidase B	MAOB	P27338	CHEMBL2039	Oxidoreductase	0.133337961498	91 / 142
P-glycoprotein 1	ABCB1	P08183	CHEMBL4302	Primary active transporter	0.125142648574	17 / 32
Norepinephrine transporter	SLC6A2	P23975	CHEMBL222	Electrochemical transporter	0.116965063224	3 / 1
Carbonic anhydrase II	CA2	P00918	CHEMBL205	Lyase	0.116965063224	248 / 26
Carbonic anhydrase I	CA1	P00915	CHEMBL261	Lyase	0.116965063224	220 / 27
Arachidonate 12-lipoxygenase	ALOX12	P18054	CHEMBL3687	Enzyme	0.108770969359	1 / 12
Thromboxane-A synthase	TBXAS1	P24557	CHEMBL1835	Cytochrome P450	0.108770969359	6 / 1
Carbonyl reductase [NADPH] 1	CBR1	P16152	CHEMBL5586	Enzyme	0.108770969359	1 / 3
Serotonin 2c (5-HT2c) receptor	HTR2C	P28335	CHEMBL225	Family A G protein-coupled receptor	0.108770969359	22 / 3
Receptor-type tyrosine-protein phosphatase S	PTPRS	Q13332	CHEMBL2396508	Phosphatase	0.108770969359	0 / 7
Estrogen-related receptor alpha	ESRRA	P11474	CHEMBL3429	Nuclear receptor	0.108770969359	1 / 2
Estrogen-related receptor beta	ESRRB	O95718	CHEMBL3751	Nuclear receptor	0.108770969359	1 / 1
Maltase-glucoamylase	MGAM	O43451	CHEMBL2074	Hydrolase	0.100578902067	1 / 1
Arachidonate 15-lipoxygenase	ALOX15	P16050	CHEMBL2903	Enzyme	0.100578902067	8 / 9
Xanthine dehydrogenase	XDH	P47989	CHEMBL1929	Oxidoreductase	0.100578902067	5 / 19
Peroxisome proliferator-activated receptor alpha	PPARA	Q07869	CHEMBL239	Nuclear receptor	0.100578902067	0 / 1
Tyrosinase	TYR	P14679	CHEMBL1973	Oxidoreductase	0.100578902067	2 / 2
NADPH oxidase 4	NOX4	Q9NPH5	CHEMBL1250375	Enzyme	0.100578902067	9 / 7
Serum paraoxonase/arylesterase 1	PON1	P27169	CHEMBL3167	Enzyme	0.100578902067	0 / 1
Dual specificity mitogen-activated protein kinase kinase 1	MAP2K1	Q02750	CHEMBL3587	Kinase	0.100578902067	16 / 0
Protein-tyrosine phosphatase 1B	PTPN1	P18031	CHEMBL335	Phosphatase	0.100578902067	28 / 17
Carbonic anhydrase IX	CA9	Q16790	CHEMBL3594	Lyase	0.100578902067	163 / 41
Carbonic anhydrase XIV	CA14	Q9ULX7	CHEMBL3510	Lyase	0.100578902067	19 / 12
Kinesin-1 heavy chain/ Tyrosine-protein kinase receptor RET	RET	P07949	CHEMBL2041	Kinase	0.100578902067	57 / 0
Neuronal acetylcholine receptor protein alpha-7 subunit	CHRNA7	P36544	CHEMBL2492	Ligand-gated ion channel	0.100578902067	15 / 0
Acetylcholinesterase	ACHE	P22303	CHEMBL220	Hydrolase	0.100578902067	21 / 67
Toll-like receptor (TLR7/TLR9)	TLR9	Q9NR96	CHEMBL5804	Toll-like and Il-1 receptors	0.100578902067	6 / 2
Vascular endothelial growth factor receptor 1	FLT1	P17948	CHEMBL1868	Kinase	0.100578902067	25 / 0
Ezrin	EZR	P15311	CHEMBL1932896	Unclassified protein	0.100578902067	3 / 0
Dopamine D1 receptor	DRD1	P21728	CHEMBL2056	Family A G protein-coupled receptor	0.100578902067	58 / 0
Ephrin type-B receptor 2	EPHB2	P29323	CHEMBL3290	Kinase	0.100578902067	6 / 0
Carbonic anhydrase III	CA3	P07451	CHEMBL2885	Lyase	0.100578902067	0 / 8
Glutamate receptor ionotropic, AMPA 1	GRIA1	P42261	CHEMBL2009	Ligand-gated ion channel	0.100578902067	8 / 0
Serine/threonine-protein kinase Chk1	CHEK1	O14757	CHEMBL4630	Kinase	0.100578902067	100 / 0
Serine/threonine-protein kinase WEE1	WEE1	P30291	CHEMBL5491	Kinase	0.100578902067	78 / 0
Beta-secretase 1	BACE1	P56817	CHEMBL4822	Protease	0.100578902067	75 / 19
Matrix metalloproteinase 1	MMP1	P03956	CHEMBL332	Protease	0.100578902067	461 / 0
ADAM17	ADAM17	P78536	CHEMBL3706	Protease	0.100578902067	235 / 0
Lysine-specific histone demethylase 1	KDM1A	O60341	CHEMBL6136	Eraser	0.100578902067	9 / 0
Alkaline phosphatase placental-like	ALPG	P10696	CHEMBL3402	Enzyme	0.100578902067	2 / 0
Alkaline phosphatase, tissue-nonspecific isozyme	ALPL	P05186	CHEMBL5979	Enzyme	0.100578902067	19 / 0
Phospholipase A-2-activating protein	PLAA	Q9Y263	CHEMBL6114	Unclassified protein	0.100578902067	5 / 0
Ribosomal protein S6 kinase 1	RPS6KB1	P23443	CHEMBL4501	Kinase	0.100578902067	62 / 0
Serine/threonine-protein kinase Aurora-A	AURKA	O14965	CHEMBL4722	Kinase	0.100578902067	164 / 0
Sodium/hydrogen exchanger 1 (by homology)	SLC9A1	P19634	CHEMBL2781	Electrochemical transporter	0.100578902067	9 / 0
Carbonic anhydrase VI	CA6	P23280	CHEMBL3025	Lyase	0.100578902067	16 / 7
Dual specificity phosphatase Cdc25A	CDC25A	P30304	CHEMBL3775	Phosphatase	0.100578902067	11 / 0
Dual specificity phosphatase Cdc25B	CDC25B	P30305	CHEMBL4804	Phosphatase	0.100578902067	13 / 0
Glycogen synthase kinase-3 alpha	GSK3A	P49840	CHEMBL2850	Kinase	0.100578902067	24 / 0
Histone deacetylase 1	HDAC1	Q13547	CHEMBL325	Eraser	0.100578902067	233 / 0
Histone deacetylase 6	HDAC6	Q9UBN7	CHEMBL1865	Eraser	0.100578902067	196 / 0
Histone deacetylase 3/Nuclear receptor corepressor 2 (HDAC3/NCoR2)	NCOR2 HDAC3	Q9Y618 O15379	CHEMBL2111363	Eraser	0.100578902067	6 / 0
Histone deacetylase 11	HDAC11	Q96DB2	CHEMBL3310	Eraser	0.100578902067	10 / 0
Histone deacetylase 10	HDAC10	Q969S8	CHEMBL5103	Eraser	0.100578902067	13 / 0
Tyrosine-protein kinase BRK	PTK6	Q13882	CHEMBL4601	Kinase	0.100578902067	18 / 0
Tyrosine-protein kinase ABL	ABL1	P00519	CHEMBL1862	Kinase	0.100578902067	74 / 0
Phosphodiesterase 4A	PDE4A	P27815	CHEMBL254	Phosphodiesterase	0.100578902067	18 / 0
Phosphodiesterase 4B	PDE4B	Q07343	CHEMBL275	Phosphodiesterase	0.100578902067	20 / 0
Phosphodiesterase 4C	PDE4C	Q08493	CHEMBL291	Phosphodiesterase	0.100578902067	4 / 0
Tyrosine-protein kinase HCK	HCK	P08631	CHEMBL3234	Kinase	0.100578902067	28 / 0
PI4-kinase beta subunit	PI4KB	Q9UBF8	CHEMBL3268	Enzyme	0.100578902067	13 / 0
Matrix metalloproteinase 8	MMP8	P22894	CHEMBL4588	Protease	0.100578902067	181 / 0
Ephrin receptor	EPHB4	P54760	CHEMBL5147	Kinase	0.100578902067	29 / 0
Rho-associated protein kinase 1	ROCK1	Q13464	CHEMBL3231	Kinase	0.100578902067	58 / 0
Serine/threonine-protein kinase PIM2	PIM2	Q9P1W9	CHEMBL4523	Kinase	0.100578902067	18 / 0
3-phosphoinositide dependent protein kinase-1	PDPK1	O15530	CHEMBL2534	Kinase	0.100578902067	22 / 0
Carbonic anhydrase XIII	CA13	Q8N1Q1	CHEMBL3912	Lyase	0.100578902067	13 / 16
Carbonic anhydrase VB	CA5B	Q9Y2D0	CHEMBL3969	Lyase	0.100578902067	12 / 7
Carbonic anhydrase VA	CA5A	P35218	CHEMBL4789	Lyase	0.100578902067	14 / 6
Ribosomal protein S6 kinase alpha 2	RPS6KA2	Q15349	CHEMBL3906	Kinase	0.100578902067	6 / 0
Serine/threonine-protein kinase MARK1	MARK1	Q9P0L2	CHEMBL5940	Kinase	0.100578902067	4 / 0
Transient receptor potential cation channel subfamily M member 8 (by homology)	TRPM8	Q7Z2W7	CHEMBL1075319	Voltage-gated ion channel	0.100578902067	16 / 0
MAP kinase-activated protein kinase 2	MAPKAPK2	P49137	CHEMBL2208	Kinase	0.100578902067	33 / 0
Fibroblast growth factor receptor 1	FGFR1	P11362	CHEMBL3650	Kinase	0.100578902067	27 / 0
Metabotropic glutamate receptor 4	GRM4	Q14833	CHEMBL2736	Family C G protein-coupled receptor	0.100578902067	7 / 0
Matrix metalloproteinase 25	MMP25	Q9NPA2	CHEMBL1795103	Enzyme	0.100578902067	1 / 0
Cyclin-dependent kinase 2/cyclin A	CDK2 CCNA1 CCNA2	P24941 P78396 P20248	CHEMBL2094128	Other cytosolic protein	0.100578902067	78 / 0
Matrix metalloproteinase 16	MMP16	P51512	CHEMBL2200	Protease	0.100578902067	21 / 0
Cyclin-dependent kinase 4	CDK4	P11802	CHEMBL331	Kinase	0.100578902067	42 / 0
Matrix metalloproteinase 14	MMP14	P50281	CHEMBL3869	Protease	0.100578902067	69 / 0
Bone morphogenetic protein 1	BMP1	P13497	CHEMBL3898	Protease	0.100578902067	128 / 0
