# Supplementary material for: A Network Pharmacology-Based Study on Irritable Bowel Syndrome Prevention and Treatment Utilizing Shenling Baizhu Powder
Source: Biomed Res Int. 2021 Nov 23;2021:4579850. doi: 10.1155/2021/4579850 (PMC8632384; doi:10.1155/2021/4579850)
Supplement: Supplementary Materials — Please find detailed data in the supplementary file, including the original data of SymMap, metabolomics, and molecular docking of Shenling Baizhu powder. “Shenling Baizhu powder SymMap” includes all herbal targets and combined targets. “Shenling Baizhu powder metabolomics” includes two-dimensional structural data analysis. “Molecular docking” involves molecule-target docking and the results. [file 4579850.f1.zip › Data in brief/2. Shenling Baizhu powder Metabolomics/2D structure/35.csv]

Target	Common name	Uniprot ID	ChEMBL ID	Target Class	Probability*	Known actives (3D/2D)
NADPH oxidase 4	NOX4	Q9NPH5	CHEMBL1250375	Enzyme	1.0	6 / 8
Aldose reductase (by homology)	AKR1B1	P15121	CHEMBL1900	Enzyme	1.0	17 / 70
Cyclin-dependent kinase 5/CDK5 activator 1	CDK5R1 CDK5	Q15078 Q00535	CHEMBL1907600	Kinase	1.0	6 / 18
Xanthine dehydrogenase	XDH	P47989	CHEMBL1929	Oxidoreductase	1.0	12 / 20
Monoamine oxidase A	MAOA	P21397	CHEMBL1951	Oxidoreductase	1.0	6 / 26
Tyrosine-protein kinase receptor FLT3	FLT3	P36888	CHEMBL1974	Kinase	1.0	6 / 7
Cytochrome P450 19A1	CYP19A1	P11511	CHEMBL1978	Cytochrome P450	1.0	6 / 19
Estrogen receptor alpha	ESR1	P03372	CHEMBL206	Nuclear receptor	1.0	76 / 49
Cyclin-dependent kinase 1/cyclin B	CCNB3 CDK1 CCNB1 CCNB2	Q8WWL7 P06493 P14635 O95067	CHEMBL2094127	Other cytosolic protein	1.0	4 / 12
Acetylcholinesterase	ACHE	P22303	CHEMBL220	Hydrolase	1.0	4 / 26
Adenosine A1 receptor (by homology)	ADORA1	P30542	CHEMBL226	Family A G protein-coupled receptor	1.0	6 / 23
Cyclooxygenase-2	PTGS2	P35354	CHEMBL230	Oxidoreductase	1.0	2 / 11
Estrogen receptor beta	ESR2	Q92731	CHEMBL242	Nuclear receptor	1.0	96 / 52
Cyclin-dependent kinase 6	CDK6	Q00534	CHEMBL2508	Kinase	1.0	3 / 4
Adenosine A2a receptor (by homology)	ADORA2A	P29274	CHEMBL251	Family A G protein-coupled receptor	1.0	5 / 11
Tyrosine-protein kinase SYK	SYK	P43405	CHEMBL2599	Kinase	1.0	3 / 3
Glycogen synthase kinase-3 beta	GSK3B	P49841	CHEMBL262	Kinase	1.0	3 / 7
Multidrug resistance-associated protein 1	ABCC1	P33527	CHEMBL3004	Primary active transporter	1.0	7 / 11
Estradiol 17-beta-dehydrogenase 1	HSD17B1	P14061	CHEMBL3181	Enzyme	1.0	9 / 4
Transthyretin	TTR	P02766	CHEMBL3194	Secreted protein	1.0	2 / 2
Casein kinase II alpha	CSNK2A1	P68400	CHEMBL3629	Kinase	1.0	4 / 2
Cystic fibrosis transmembrane conductance regulator	CFTR	P13569	CHEMBL4051	Other ion channel	1.0	1 / 1
Cytochrome P450 1B1	CYP1B1	Q16678	CHEMBL4878	Cytochrome P450	1.0	12 / 47
ATP-binding cassette sub-family G member 2	ABCG2	Q9UNQ0	CHEMBL5393	Primary active transporter	1.0	6 / 47
Aldo-keto reductase family 1 member B10	AKR1B10	O60218	CHEMBL5983	Enzyme	1.0	2 / 3
Tankyrase-2	TNKS2	Q9H2K2	CHEMBL6154	Enzyme	1.0	4 / 12
Tankyrase-1	TNKS	O95271	CHEMBL6164	Enzyme	1.0	4 / 28
Arachidonate 5-lipoxygenase	ALOX5	P09917	CHEMBL215	Oxidoreductase	0.608509241108	5 / 46
Poly [ADP-ribose] polymerase-1	PARP1	P09874	CHEMBL3105	Enzyme	0.608509241108	3 / 9
Carbonic anhydrase II	CA2	P00918	CHEMBL205	Lyase	0.54289985377	8 / 15
Carbonic anhydrase VII	CA7	P43166	CHEMBL2326	Lyase	0.54289985377	8 / 11
Carbonic anhydrase XII	CA12	O43570	CHEMBL3242	Lyase	0.54289985377	10 / 16
P-glycoprotein 1	ABCB1	P08183	CHEMBL4302	Primary active transporter	0.54289985377	12 / 47
Arachidonate 12-lipoxygenase	ALOX12	P18054	CHEMBL3687	Enzyme	0.493789288083	9 / 11
Carbonic anhydrase IV	CA4	P22748	CHEMBL3729	Lyase	0.485540261393	7 / 11
Receptor-type tyrosine-protein phosphatase S	PTPRS	Q13332	CHEMBL2396508	Phosphatase	0.411906406077	7 / 8
Glyoxalase I	GLO1	Q04760	CHEMBL2424	Enzyme	0.370888463379	3 / 4
Beta amyloid A4 protein	APP	P05067	CHEMBL2487	Membrane receptor	0.370888463379	2 / 13
Matrix metalloproteinase 9	MMP9	P14780	CHEMBL321	Protease	0.370888463379	2 / 2
Matrix metalloproteinase 2	MMP2	P08253	CHEMBL333	Protease	0.370888463379	2 / 2
Matrix metalloproteinase 12	MMP12	P39900	CHEMBL4393	Protease	0.370888463379	1 / 1
Lymphocyte differentiation antigen CD38	CD38	P28907	CHEMBL4660	Enzyme	0.370888463379	2 / 2
DNA topoisomerase I (by homology)	TOP1	P11387	CHEMBL1781	Isomerase	0.370888463379	1 / 1
Arginase-1 (by homology)	ARG1	P05089	CHEMBL1075097	Enzyme	0.370888463379	2 / 2
Estrogen-related receptor alpha	ESRRA	P11474	CHEMBL3429	Nuclear receptor	0.362674718576	2 / 2
6-phosphofructo-2-kinase/fructose-2,6-bisphosphatase 3	PFKFB3	Q16875	CHEMBL2331053	Enzyme	0.338110309869	2 / 2
AMY1C	AMY1A	P04745	CHEMBL2478	Enzyme	0.338110309869	1 / 1
G protein-coupled receptor kinase 6	GRK6	P43250	CHEMBL6144	Kinase	0.338110309869	2 / 4
Arachidonate 15-lipoxygenase	ALOX15	P16050	CHEMBL2903	Enzyme	0.329868485421	6 / 8
Tyrosinase	TYR	P14679	CHEMBL1973	Oxidoreductase	0.264392858136	2 / 3
Estradiol 17-beta-dehydrogenase 2	HSD17B2	P37059	CHEMBL2789	Enzyme	0.264392858136	9 / 3
Aryl hydrocarbon receptor	AHR	P35869	CHEMBL3201	Transcription factor	0.264392858136	1 / 1
Carbonic anhydrase I	CA1	P00915	CHEMBL261	Lyase	0.2562278396	4 / 7
Carbonic anhydrase IX	CA9	Q16790	CHEMBL3594	Lyase	0.2562278396	3 / 7
Carbonyl reductase [NADPH] 1	CBR1	P16152	CHEMBL5586	Enzyme	0.247942822879	3 / 2
Androgen Receptor	AR	P10275	CHEMBL1871	Nuclear receptor	0.247942822879	0 / 16
Telomerase reverse transcriptase	TERT	O14746	CHEMBL2916	Enzyme	0.239574695827	9 / 21
Serine/threonine-protein kinase PIM1	PIM1	P11309	CHEMBL2147	Kinase	0.239574695827	8 / 7
Epidermal growth factor receptor erbB1	EGFR	P00533	CHEMBL203	Kinase	0.207053973629	9 / 30
Cyclin-dependent kinase 1	CDK1	P06493	CHEMBL308	Kinase	0.190656977035	3 / 10
Lysine-specific demethylase 4D-like	KDM4E	B2RXH2	CHEMBL1293226	Eraser	0.166097445484	2 / 2
Tyrosine-protein kinase LCK	LCK	P06239	CHEMBL258	Kinase	0.149732593856	5 / 3
Serine/threonine-protein kinase Aurora-B	AURKB	Q96GD4	CHEMBL2185	Kinase	0.149732593856	3 / 4
Thromboxane-A synthase	TBXAS1	P24557	CHEMBL1835	Cytochrome P450	0.141522086267	1 / 2
NEDD8-activating enzyme E1 regulatory subunit	NAE1	Q13564	CHEMBL2016431	Unclassified protein	0.141522086267	0 / 1
Insulin-like growth factor I receptor	IGF1R	P08069	CHEMBL1957	Kinase	0.133337961498	3 / 3
Vascular endothelial growth factor receptor 2	KDR	P35968	CHEMBL279	Kinase	0.125142648574	2 / 3
Serine/threonine-protein kinase PLK1	PLK1	P53350	CHEMBL3024	Kinase	0.125142648574	2 / 3
Hepatocyte growth factor receptor	MET	P08581	CHEMBL3717	Kinase	0.125142648574	4 / 4
ALK tyrosine kinase receptor	ALK	Q9UM73	CHEMBL4247	Kinase	0.125142648574	2 / 4
Tyrosine-protein kinase receptor UFO	AXL	P30530	CHEMBL4895	Kinase	0.125142648574	2 / 4
Butyrylcholinesterase	BCHE	P06276	CHEMBL1914	Hydrolase	0.125142648574	1 / 7
Adenosine A3 receptor	ADORA3	P0DMS8	CHEMBL256	Family A G protein-coupled receptor	0.125142648574	1 / 21
Cyclin-dependent kinase 2	CDK2	P24941	CHEMBL301	Kinase	0.125142648574	1 / 12
Serotonin 2c (5-HT2c) receptor	HTR2C	P28335	CHEMBL225	Family A G protein-coupled receptor	0.125142648574	1 / 2
G-protein coupled receptor 35	GPR35	Q9HC97	CHEMBL1293267	Family A G protein-coupled receptor	0.116965063224	2 / 4
Death-associated protein kinase 1	DAPK1	P53355	CHEMBL2558	Kinase	0.116965063224	2 / 2
DNA-3-methyladenine glycosylase	MPG	P29372	CHEMBL3396943	Enzyme	0.116965063224	1 / 1
Solute carrier family 22 member 12	SLC22A12	Q96S37	CHEMBL6120	Electrochemical transporter	0.116965063224	6 / 1
Thrombin	F2	P00734	CHEMBL204	Protease	0.108770969359	11 / 3
Beta-galactoside alpha-2,6-sialyltransferase 1	ST6GAL1	P15907	CHEMBL3596075	Transferase	0.108770969359	0 / 2
Plasminogen	PLG	P00747	CHEMBL1801	Protease	0.108770969359	6 / 3
Vasopressin V2 receptor	AVPR2	P30518	CHEMBL1790	Family A G protein-coupled receptor	0.108770969359	1 / 1
Dopamine D4 receptor	DRD4	P21917	CHEMBL219	Family A G protein-coupled receptor	0.108770969359	1 / 1
Myeloperoxidase	MPO	P05164	CHEMBL2439	Enzyme	0.108770969359	1 / 1
PI3-kinase p85-alpha subunit	PIK3R1	P27986	CHEMBL2506	Enzyme	0.108770969359	1 / 1
Liver glycogen phosphorylase	PYGL	P06737	CHEMBL2568	Enzyme	0.108770969359	1 / 1
Tyrosine-protein kinase SRC	SRC	P12931	CHEMBL267	Kinase	0.108770969359	5 / 8
Focal adhesion kinase 1	PTK2	Q05397	CHEMBL2695	Kinase	0.108770969359	1 / 2
Matrix metalloproteinase 13	MMP13	P45452	CHEMBL280	Protease	0.108770969359	1 / 1
Matrix metalloproteinase 3	MMP3	P08254	CHEMBL283	Protease	0.108770969359	1 / 1
Carbonic anhydrase III	CA3	P07451	CHEMBL2885	Lyase	0.108770969359	1 / 2
Carbonic anhydrase VI	CA6	P23280	CHEMBL3025	Lyase	0.108770969359	1 / 1
Protein kinase N1	PKN1	Q16512	CHEMBL3384	Kinase	0.108770969359	1 / 3
Carbonic anhydrase XIV	CA14	Q9ULX7	CHEMBL3510	Lyase	0.108770969359	1 / 2
Serine/threonine-protein kinase NEK2	NEK2	P51955	CHEMBL3835	Kinase	0.108770969359	1 / 2
Interleukin-8 receptor A	CXCR1	P25024	CHEMBL4029	Family A G protein-coupled receptor	0.108770969359	1 / 1
CaM kinase II beta	CAMK2B	Q13554	CHEMBL4121	Kinase	0.108770969359	1 / 2
Serine/threonine-protein kinase AKT	AKT1	P31749	CHEMBL4282	Kinase	0.108770969359	1 / 4
Serine/threonine-protein kinase NEK6	NEK6	Q9HC98	CHEMBL4309	Kinase	0.108770969359	1 / 2
