# Supplementary material for: A Network Pharmacology-Based Study on Irritable Bowel Syndrome Prevention and Treatment Utilizing Shenling Baizhu Powder
Source: Biomed Res Int. 2021 Nov 23;2021:4579850. doi: 10.1155/2021/4579850 (PMC8632384; doi:10.1155/2021/4579850)
Supplement: Supplementary Materials — Please find detailed data in the supplementary file, including the original data of SymMap, metabolomics, and molecular docking of Shenling Baizhu powder. “Shenling Baizhu powder SymMap” includes all herbal targets and combined targets. “Shenling Baizhu powder metabolomics” includes two-dimensional structural data analysis. “Molecular docking” involves molecule-target docking and the results. [file 4579850.f1.zip › Data in brief/2. Shenling Baizhu powder Metabolomics/2D structure/36.csv]

Target	Common name	Uniprot ID	ChEMBL ID	Target Class	Probability*	Known actives (3D/2D)
Monoamine oxidase B	MAOB	P27338	CHEMBL2039	Oxidoreductase	0.280808559877	36 / 107
ATP-binding cassette sub-family G member 2	ABCG2	Q9UNQ0	CHEMBL5393	Primary active transporter	0.141522086267	17 / 51
Neuronal acetylcholine receptor protein alpha-7 subunit	CHRNA7	P36544	CHEMBL2492	Ligand-gated ion channel	0.133337961498	14 / 11
Aldose reductase (by homology)	AKR1B1	P15121	CHEMBL1900	Enzyme	0.133337961498	59 / 43
Protein-tyrosine phosphatase 1B	PTPN1	P18031	CHEMBL335	Phosphatase	0.125142648574	23 / 33
Coagulation factor VII/tissue factor	F3	P13726	CHEMBL4081	Surface antigen	0.116965063224	20 / 8
Beta amyloid A4 protein	APP	P05067	CHEMBL2487	Membrane receptor	0.116965063224	21 / 19
Monoamine oxidase A	MAOA	P21397	CHEMBL1951	Oxidoreductase	0.108770969359	29 / 34
Beta-secretase 1	BACE1	P56817	CHEMBL4822	Protease	0.108770969359	99 / 39
Cytochrome P450 19A1	CYP19A1	P11511	CHEMBL1978	Cytochrome P450	0.108770969359	40 / 34
Arachidonate 5-lipoxygenase	ALOX5	P09917	CHEMBL215	Oxidoreductase	0.100578902067	85 / 30
Cyclooxygenase-2	PTGS2	P35354	CHEMBL230	Oxidoreductase	0.100578902067	41 / 39
Voltage-gated potassium channel subunit Kv1.3	KCNA3	P22001	CHEMBL4633	Voltage-gated ion channel	0.100578902067	2 / 8
Epidermal growth factor receptor erbB1	EGFR	P00533	CHEMBL203	Kinase	0.100578902067	93 / 19
Estrogen-related receptor beta	ESRRB	O95718	CHEMBL3751	Nuclear receptor	0.100578902067	18 / 0
Serine/threonine-protein kinase Chk1	CHEK1	O14757	CHEMBL4630	Kinase	0.100578902067	105 / 0
Serine/threonine-protein kinase WEE1	WEE1	P30291	CHEMBL5491	Kinase	0.100578902067	81 / 0
Nitric oxide synthase, inducible	NOS2	P35228	CHEMBL4481	Enzyme	0.100578902067	23 / 10
Alpha-1b adrenergic receptor	ADRA1B	P35368	CHEMBL232	Family A G protein-coupled receptor	0.100578902067	8 / 0
P-glycoprotein 1	ABCB1	P08183	CHEMBL4302	Primary active transporter	0.100578902067	7 / 21
Tyrosinase	TYR	P14679	CHEMBL1973	Oxidoreductase	0.100578902067	5 / 0
Cyclin-dependent kinase 1	CDK1	P06493	CHEMBL308	Kinase	0.100578902067	18 / 0
Matrix metalloproteinase 9	MMP9	P14780	CHEMBL321	Protease	0.100578902067	352 / 0
Matrix metalloproteinase 1	MMP1	P03956	CHEMBL332	Protease	0.100578902067	361 / 0
Serine/threonine-protein kinase Sgk1	SGK1	O00141	CHEMBL2343	Kinase	0.100578902067	2 / 0
3-phosphoinositide dependent protein kinase-1	PDPK1	O15530	CHEMBL2534	Kinase	0.100578902067	7 / 1
Matrix metalloproteinase 3	MMP3	P08254	CHEMBL283	Protease	0.100578902067	193 / 0
Matrix metalloproteinase 8	MMP8	P22894	CHEMBL4588	Protease	0.100578902067	146 / 0
Hematopoietic prostaglandin D synthase	HPGDS	O60760	CHEMBL5879	Transferase	0.100578902067	4 / 0
Ornithine decarboxylase	ODC1	P11926	CHEMBL1869	Lyase	0.100578902067	0 / 5
Telomerase reverse transcriptase	TERT	O14746	CHEMBL2916	Enzyme	0.100578902067	9 / 2
Insulin receptor	INSR	P06213	CHEMBL1981	Kinase	0.100578902067	7 / 0
Protein kinase C (PKC)	PRKCZ	Q05513	CHEMBL3438	Kinase	0.100578902067	3 / 0
Calpain 1	CAPN1	P07384	CHEMBL3891	Protease	0.100578902067	15 / 0
Ribosomal protein S6 kinase 1	RPS6KB1	P23443	CHEMBL4501	Kinase	0.100578902067	42 / 0
Arachidonate 15-lipoxygenase	ALOX15	P16050	CHEMBL2903	Enzyme	0.100578902067	30 / 0
Histone deacetylase 5	HDAC5	Q9UQL6	CHEMBL2563	Eraser	0.100578902067	17 / 0
Histone deacetylase 7	HDAC7	Q8WUI4	CHEMBL2716	Eraser	0.100578902067	24 / 0
Histone deacetylase 8	HDAC8	Q9BY41	CHEMBL3192	Eraser	0.100578902067	160 / 0
Histone deacetylase 9	HDAC9	Q9UKV0	CHEMBL4145	Eraser	0.100578902067	14 / 0
Tyrosine-protein kinase receptor FLT3	FLT3	P36888	CHEMBL1974	Kinase	0.100578902067	18 / 0
Serine/threonine-protein kinase PLK1	PLK1	P53350	CHEMBL3024	Kinase	0.100578902067	10 / 0
Transient receptor potential cation channel subfamily M member 8 (by homology)	TRPM8	Q7Z2W7	CHEMBL1075319	Voltage-gated ion channel	0.100578902067	6 / 0
NADPH oxidase 4	NOX4	Q9NPH5	CHEMBL1250375	Enzyme	0.100578902067	9 / 0
Multidrug resistance-associated protein 1	ABCC1	P33527	CHEMBL3004	Primary active transporter	0.100578902067	5 / 0
Testis-specific androgen-binding protein	SHBG	P04278	CHEMBL3305	Secreted protein	0.100578902067	2 / 0
Sodium/glucose cotransporter 1	SLC5A1	P13866	CHEMBL4979	Electrochemical transporter	0.100578902067	3 / 0
Carbonyl reductase [NADPH] 1	CBR1	P16152	CHEMBL5586	Enzyme	0.100578902067	2 / 0
Pyruvate dehydrogenase kinase isoform 1	PDK1	Q15118	CHEMBL4766	Kinase	0.100578902067	125 / 0
Arachidonate 12-lipoxygenase	ALOX12	P18054	CHEMBL3687	Enzyme	0.100578902067	9 / 0
Leukotriene B4 receptor 1	LTB4R	Q15722	CHEMBL3911	Family A G protein-coupled receptor	0.100578902067	7 / 0
ADAM17	ADAM17	P78536	CHEMBL3706	Protease	0.100578902067	188 / 0
Sodium/hydrogen exchanger 1 (by homology)	SLC9A1	P19634	CHEMBL2781	Electrochemical transporter	0.100578902067	10 / 0
Matrix metalloproteinase 2	MMP2	P08253	CHEMBL333	Protease	0.100578902067	325 / 1
Aldehyde dehydrogenase	ALDH2	P05091	CHEMBL1935	Oxidoreductase	0.100578902067	1 / 1
Cyclin-dependent kinase 2	CDK2	P24941	CHEMBL301	Kinase	0.100578902067	35 / 0
Cyclin-dependent kinase 4	CDK4	P11802	CHEMBL331	Kinase	0.100578902067	23 / 0
Acetylcholinesterase	ACHE	P22303	CHEMBL220	Hydrolase	0.100578902067	23 / 57
Peroxisome proliferator-activated receptor gamma	PPARG	P37231	CHEMBL235	Nuclear receptor	0.100578902067	0 / 10
Serine/threonine-protein kinase B-raf	BRAF	P15056	CHEMBL5145	Kinase	0.100578902067	108 / 0
Dopamine D5 receptor	DRD5	P21918	CHEMBL1850	Family A G protein-coupled receptor	0.100578902067	3 / 0
Tubulin beta-1 chain	TUBB1	Q9H4B7	CHEMBL1915	Structural protein	0.100578902067	6 / 16
Dual specificity protein phosphatase 3	DUSP3	P51452	CHEMBL2635	Phosphatase	0.100578902067	5 / 0
Toll-like receptor (TLR7/TLR9)	TLR9	Q9NR96	CHEMBL5804	Toll-like and Il-1 receptors	0.100578902067	3 / 5
Tyrosine-protein kinase SYK	SYK	P43405	CHEMBL2599	Kinase	0.100578902067	28 / 0
Serine/threonine-protein kinase RAF	RAF1	P04049	CHEMBL1906	Kinase	0.100578902067	88 / 0
Matrix metalloproteinase 13	MMP13	P45452	CHEMBL280	Protease	0.100578902067	225 / 0
Serotonin 3a (5-HT3a) receptor (by homology)	HTR3A	P46098	CHEMBL1899	Ligand-gated ion channel	0.100578902067	5 / 0
Plasminogen activator inhibitor-1	SERPINE1	P05121	CHEMBL3475	Secreted protein	0.100578902067	8 / 0
Glucagon receptor	GCGR	P47871	CHEMBL1985	Family B G protein-coupled receptor	0.0	8 / 0
Estrogen receptor alpha	ESR1	P03372	CHEMBL206	Nuclear receptor	0.0	331 / 50
Estrogen receptor beta	ESR2	Q92731	CHEMBL242	Nuclear receptor	0.0	311 / 38
Rho-associated protein kinase 2	ROCK2	O75116	CHEMBL2973	Kinase	0.0	43 / 0
Histone deacetylase 6	HDAC6	Q9UBN7	CHEMBL1865	Eraser	0.0	219 / 0
Apoptosis regulator Bcl-X	BCL2L1	Q07817	CHEMBL4625	Other ion channel	0.0	1 / 0
Apoptosis regulator Bcl-2	BCL2	P10415	CHEMBL4860	Other ion channel	0.0	7 / 0
Tyrosine-protein kinase ABL	ABL1	P00519	CHEMBL1862	Kinase	0.0	27 / 0
Platelet-derived growth factor receptor beta	PDGFRB	P09619	CHEMBL1913	Kinase	0.0	8 / 0
Histone deacetylase 1 (by homology)	HDAC1	Q13547	CHEMBL325	Eraser	0.0	285 / 0
Kinesin-like protein 1	KIF11	P52732	CHEMBL4581	Other cytosolic protein	0.0	7 / 0
Mitogen-activated protein kinase kinase kinase kinase 4	MAP4K4	O95819	CHEMBL6166	Kinase	0.0	7 / 0
Endothelin receptor ET-A	EDNRA	P25101	CHEMBL252	Family A G protein-coupled receptor	0.0	59 / 35
Serotonin 1a (5-HT1a) receptor	HTR1A	P08908	CHEMBL214	Family A G protein-coupled receptor	0.0	33 / 0
Thyroid hormone receptor alpha	THRA	P10827	CHEMBL1860	Nuclear receptor	0.0	11 / 0
Thyroid hormone receptor beta-1	THRB	P10828	CHEMBL1947	Nuclear receptor	0.0	9 / 0
Inosine-5'-monophosphate dehydrogenase 1	IMPDH1	P20839	CHEMBL1822	Oxidoreductase	0.0	6 / 0
Melatonin receptor 1A	MTNR1A	P48039	CHEMBL1945	Family A G protein-coupled receptor	0.0	7 / 0
Melatonin receptor 1B	MTNR1B	P49286	CHEMBL1946	Family A G protein-coupled receptor	0.0	5 / 0
Cyclooxygenase-1	PTGS1	P23219	CHEMBL221	Oxidoreductase	0.0	22 / 14
Taste receptor type 2 member 31	TAS2R31	P59538	CHEMBL2034804	Taste family G protein-coupled receptor	0.0	1 / 0
Matrix metalloproteinase 12	MMP12	P39900	CHEMBL4393	Protease	0.0	27 / 0
Ras-related C3 botulinum toxin substrate 1	RAC1	P63000	CHEMBL6094	Unclassified protein	0.0	2 / 0
17-beta-hydroxysteroid dehydrogenase 14	HSD17B14	Q9BPX1	CHEMBL3712868	Enzyme	0.0	1 / 0
Serine/threonine-protein kinase Chk2	CHEK2	O96017	CHEMBL2527	Kinase	0.0	16 / 0
Alpha-synuclein	SNCA	P37840	CHEMBL6152	Unclassified protein	0.0	8 / 3
Histone deacetylase 3	HDAC3	O15379	CHEMBL1829	Eraser	0.0	100 / 0
Histone deacetylase 10	HDAC10	Q969S8	CHEMBL5103	Eraser	0.0	19 / 0
Cyclin-dependent kinase 2/cyclin E1	CCNE1 CDK2	P24864 P24941	CHEMBL1907605	Kinase	0.0	10 / 0
6-phosphofructo-2-kinase/fructose-2,6-bisphosphatase 3	PFKFB3	Q16875	CHEMBL2331053	Enzyme	0.0	10 / 0
CDK3/Cyclin E	CCNE1 CDK3	P24864 Q00526	CHEMBL3038471	Kinase	0.0	6 / 0
