# Supplementary material for: A Network Pharmacology-Based Study on Irritable Bowel Syndrome Prevention and Treatment Utilizing Shenling Baizhu Powder
Source: Biomed Res Int. 2021 Nov 23;2021:4579850. doi: 10.1155/2021/4579850 (PMC8632384; doi:10.1155/2021/4579850)
Supplement: Supplementary Materials — Please find detailed data in the supplementary file, including the original data of SymMap, metabolomics, and molecular docking of Shenling Baizhu powder. “Shenling Baizhu powder SymMap” includes all herbal targets and combined targets. “Shenling Baizhu powder metabolomics” includes two-dimensional structural data analysis. “Molecular docking” involves molecule-target docking and the results. [file 4579850.f1.zip › Data in brief/2. Shenling Baizhu powder Metabolomics/2D structure/37.csv]

Target	Common name	Uniprot ID	ChEMBL ID	Target Class	Probability*	Known actives (3D/2D)
Neuronal acetylcholine receptor protein alpha-7 subunit	CHRNA7	P36544	CHEMBL2492	Ligand-gated ion channel	1.0	5 / 11
Aldose reductase	AKR1B1	P15121	CHEMBL1900	Enzyme	0.85047304884	32 / 42
Epidermal growth factor receptor erbB1	EGFR	P00533	CHEMBL203	Kinase	0.534712891919	35 / 17
Monoamine oxidase B	MAOB	P27338	CHEMBL2039	Oxidoreductase	0.313572766871	15 / 106
Beta-secretase 1	BACE1	P56817	CHEMBL4822	Protease	0.223449266359	44 / 33
Cytochrome P450 19A1	CYP19A1	P11511	CHEMBL1978	Cytochrome P450	0.215238178243	11 / 29
Telomerase reverse transcriptase	TERT	O14746	CHEMBL2916	Enzyme	0.198833760448	9 / 2
Beta amyloid A4 protein	APP	P05067	CHEMBL2487	Membrane receptor	0.190656977035	11 / 16
Coagulation factor VII/tissue factor	F3	P13726	CHEMBL4081	Surface antigen	0.182484828777	7 / 8
Aldehyde dehydrogenase	ALDH2	P05091	CHEMBL1935	Oxidoreductase	0.141522086267	0 / 1
Monoamine oxidase A	MAOA	P21397	CHEMBL1951	Oxidoreductase	0.133337961498	12 / 31
Alpha-synuclein	SNCA	P37840	CHEMBL6152	Unclassified protein	0.116965063224	24 / 3
Voltage-gated potassium channel subunit Kv1.3	KCNA3	P22001	CHEMBL4633	Voltage-gated ion channel	0.116965063224	0 / 8
Nitric oxide synthase, inducible	NOS2	P35228	CHEMBL4481	Enzyme	0.108770969359	12 / 10
ATP-binding cassette sub-family G member 2	ABCG2	Q9UNQ0	CHEMBL5393	Primary active transporter	0.108770969359	3 / 50
Arachidonate 5-lipoxygenase	ALOX5	P09917	CHEMBL215	Oxidoreductase	0.108770969359	35 / 31
Estrogen receptor alpha	ESR1	P03372	CHEMBL206	Nuclear receptor	0.100578902067	187 / 67
Cyclooxygenase-2	PTGS2	P35354	CHEMBL230	Oxidoreductase	0.100578902067	27 / 15
Toll-like receptor (TLR7/TLR9)	TLR9	Q9NR96	CHEMBL5804	Toll-like and Il-1 receptors	0.100578902067	0 / 6
Microtubule-associated protein tau	MAPT	P10636	CHEMBL1293224	Unclassified protein	0.100578902067	3 / 1
Estrogen receptor beta	ESR2	Q92731	CHEMBL242	Nuclear receptor	0.100578902067	175 / 54
Multidrug resistance-associated protein 1	ABCC1	P33527	CHEMBL3004	Primary active transporter	0.100578902067	3 / 0
Estradiol 17-beta-dehydrogenase 1	HSD17B1	P14061	CHEMBL3181	Enzyme	0.100578902067	116 / 0
Testis-specific androgen-binding protein	SHBG	P04278	CHEMBL3305	Secreted protein	0.100578902067	1 / 0
Cytochrome P450 1B1	CYP1B1	Q16678	CHEMBL4878	Cytochrome P450	0.100578902067	6 / 0
Carbonyl reductase [NADPH] 1	CBR1	P16152	CHEMBL5586	Enzyme	0.100578902067	1 / 0
Tyrosinase	TYR	P14679	CHEMBL1973	Oxidoreductase	0.100578902067	4 / 0
Tubulin beta-1 chain	TUBB1	Q9H4B7	CHEMBL1915	Structural protein	0.100578902067	0 / 15
P-glycoprotein 1	ABCB1	P08183	CHEMBL4302	Primary active transporter	0.100578902067	3 / 17
Cyclooxygenase-1	PTGS1	P23219	CHEMBL221	Oxidoreductase	0.100578902067	13 / 18
Dual-specificity tyrosine-phosphorylation regulated kinase 1A (by homology)	DYRK1A	Q13627	CHEMBL2292	Kinase	0.100578902067	35 / 0
NADPH oxidase 4	NOX4	Q9NPH5	CHEMBL1250375	Enzyme	0.100578902067	7 / 0
3-phosphoinositide dependent protein kinase-1	PDPK1	O15530	CHEMBL2534	Kinase	0.100578902067	3 / 1
Aldo-keto-reductase family 1 member C3	AKR1C3	P42330	CHEMBL4681	Enzyme	0.100578902067	0 / 3
Insulin-like growth factor I receptor	IGF1R	P08069	CHEMBL1957	Kinase	0.100578902067	18 / 1
Dual specificty protein kinase CLK1	CLK1	P49759	CHEMBL4224	Kinase	0.100578902067	19 / 0
Dual specificity tyrosine-phosphorylation-regulated kinase 1B	DYRK1B	Q9Y463	CHEMBL5543	Kinase	0.100578902067	16 / 0
Estradiol 17-beta-dehydrogenase 2	HSD17B2	P37059	CHEMBL2789	Enzyme	0.100578902067	112 / 0
17-beta-hydroxysteroid dehydrogenase 14	HSD17B14	Q9BPX1	CHEMBL3712868	Enzyme	0.100578902067	1 / 0
Serine/threonine-protein kinase Chk1	CHEK1	O14757	CHEMBL4630	Kinase	0.100578902067	74 / 0
Serine/threonine-protein kinase WEE1	WEE1	P30291	CHEMBL5491	Kinase	0.100578902067	74 / 0
Hematopoietic prostaglandin D synthase	HPGDS	O60760	CHEMBL5879	Transferase	0.100578902067	1 / 0
Insulin receptor	INSR	P06213	CHEMBL1981	Kinase	0.100578902067	5 / 0
DNA topoisomerase I	TOP1	P11387	CHEMBL1781	Isomerase	0.100578902067	5 / 0
6-phosphogluconate dehydrogenase	PGD	P52209	CHEMBL3404	Enzyme	0.100578902067	4 / 0
Calpain 1	CAPN1	P07384	CHEMBL3891	Protease	0.100578902067	12 / 0
Insulin-like growth factor binding protein 3	IGFBP3	P17936	CHEMBL3997	Secreted protein	0.100578902067	1 / 0
MAP kinase p38 alpha	MAPK14	Q16539	CHEMBL260	Kinase	0.100578902067	11 / 0
Arachidonate 15-lipoxygenase	ALOX15	P16050	CHEMBL2903	Enzyme	0.100578902067	23 / 0
14-3-3 protein gamma	YWHAG	P61981	CHEMBL1293296	Unclassified protein	0.100578902067	1 / 0
Adenylate cyclase type V	ADCY5	O95622	CHEMBL3189	Enzyme	0.100578902067	8 / 0
Dihydroorotate dehydrogenase	DHODH	Q02127	CHEMBL1966	Oxidoreductase	0.100578902067	0 / 1
Dual specificity protein phosphatase 3	DUSP3	P51452	CHEMBL2635	Phosphatase	0.100578902067	2 / 0
Matrix metalloproteinase 12	MMP12	P39900	CHEMBL4393	Protease	0.100578902067	13 / 0
Fibroblast growth factor receptor 1	FGFR1	P11362	CHEMBL3650	Kinase	0.100578902067	4 / 0
Hepatocyte growth factor receptor	MET	P08581	CHEMBL3717	Kinase	0.100578902067	26 / 0
Tyrosine-protein kinase ABL	ABL1	P00519	CHEMBL1862	Kinase	0.100578902067	16 / 0
Platelet-derived growth factor receptor beta	PDGFRB	P09619	CHEMBL1913	Kinase	0.100578902067	3 / 0
Tyrosine-protein kinase receptor FLT3	FLT3	P36888	CHEMBL1974	Kinase	0.100578902067	5 / 0
Apoptosis regulator Bcl-X	BCL2L1	Q07817	CHEMBL4625	Other ion channel	0.100578902067	2 / 0
Zinc finger protein GLI2	GLI2	P10070	CHEMBL5119	Transcription factor	0.100578902067	1 / 0
Zinc finger protein GLI1	GLI1	P08151	CHEMBL5461	Transcription factor	0.100578902067	1 / 0
Cyclin-dependent kinase 1/cyclin B1	CDK1 CCNB1	P06493 P14635	CHEMBL1907602	Other cytosolic protein	0.100578902067	1 / 0
Cyclin-dependent kinase 2/cyclin E1	CCNE1 CDK2	P24864 P24941	CHEMBL1907605	Kinase	0.100578902067	2 / 0
CDK3/Cyclin E	CCNE1 CDK3	P24864 Q00526	CHEMBL3038471	Kinase	0.100578902067	2 / 0
G-protein coupled receptor kinase 2	GRK2	P25098	CHEMBL4079	Kinase	0.100578902067	2 / 0
5-lipoxygenase activating protein	ALOX5AP	P20292	CHEMBL4550	Other cytosolic protein	0.100578902067	69 / 0
Thymidylate synthase (by homology)	TYMS	P04818	CHEMBL1952	Transferase	0.100578902067	21 / 0
Dynamin-1	DNM1	Q05193	CHEMBL4958	Enzyme	0.0	5 / 0
C-X-C chemokine receptor type 4	CXCR4	P61073	CHEMBL2107	Family A G protein-coupled receptor	0.0	0 / 1
Acetylcholinesterase	ACHE	P22303	CHEMBL220	Hydrolase	0.0	3 / 41
Alkaline phosphatase, tissue-nonspecific isozyme	ALPL	P05186	CHEMBL5979	Enzyme	0.0	5 / 0
Cathepsin L	CTSL	P07711	CHEMBL3837	Protease	0.0	5 / 5
Serine/threonine-protein kinase/endoribonuclease IRE1	ERN1	O75460	CHEMBL1163101	Enzyme	0.0	12 / 0
Pyruvate dehydrogenase kinase isoform 1	PDK1	Q15118	CHEMBL4766	Kinase	0.0	128 / 0
ADAM17	ADAM17	P78536	CHEMBL3706	Protease	0.0	42 / 0
PI3-kinase p110-gamma subunit	PIK3CG	P48736	CHEMBL3267	Enzyme	0.0	18 / 0
Transitional endoplasmic reticulum ATPase	VCP	P55072	CHEMBL1075145	Primary active transporter	0.0	2 / 0
Rho-associated protein kinase 1	ROCK1	Q13464	CHEMBL3231	Kinase	0.0	9 / 0
Ribosomal protein S6 kinase 1	RPS6KB1	P23443	CHEMBL4501	Kinase	0.0	13 / 0
Estrogen-related receptor beta	ESRRB	O95718	CHEMBL3751	Nuclear receptor	0.0	17 / 0
Ornithine decarboxylase	ODC1	P11926	CHEMBL1869	Lyase	0.0	0 / 2
Histone deacetylase 6	HDAC6	Q9UBN7	CHEMBL1865	Eraser	0.0	73 / 0
Histone deacetylase 8	HDAC8	Q9BY41	CHEMBL3192	Eraser	0.0	58 / 0
Serine/threonine-protein kinase RAF	RAF1	P04049	CHEMBL1906	Kinase	0.0	57 / 0
Serine/threonine-protein kinase B-raf	BRAF	P15056	CHEMBL5145	Kinase	0.0	70 / 0
Peroxisome proliferator-activated receptor gamma	PPARG	P37231	CHEMBL235	Nuclear receptor	0.0	0 / 13
DNA (cytosine-5)-methyltransferase 1	DNMT1	P26358	CHEMBL1993	Writer	0.0	1 / 0
Arachidonate 12-lipoxygenase	ALOX12	P18054	CHEMBL3687	Enzyme	0.0	8 / 0
Matrix metalloproteinase 14	MMP14	P50281	CHEMBL3869	Protease	0.0	18 / 0
Signal transducer and activator of transcription 1-alpha/beta	STAT1	P42224	CHEMBL6101	Transcription factor	0.0	1 / 0
Squalene monooxygenase (by homology)	SQLE	Q14534	CHEMBL3592	Enzyme	0.0	1 / 0
Thrombin	F2	P00734	CHEMBL204	Protease	0.0	60 / 0
Potassium-transporting ATPase	ATP4B ATP4A	P51164 P20648	CHEMBL2095173	Primary active transporter	0.0	2 / 0
Serine/threonine-protein kinase Chk2	CHEK2	O96017	CHEMBL2527	Kinase	0.0	5 / 0
Cathepsin (B and K)	CTSB	P07858	CHEMBL4072	Protease	0.0	0 / 1
Histone deacetylase 3	HDAC3	O15379	CHEMBL1829	Eraser	0.0	35 / 0
Thyroid hormone receptor alpha	THRA	P10827	CHEMBL1860	Nuclear receptor	0.0	8 / 0
Histone deacetylase 5	HDAC5	Q9UQL6	CHEMBL2563	Eraser	0.0	8 / 0
Matrix metalloproteinase 3	MMP3	P08254	CHEMBL283	Protease	0.0	34 / 0
