# Supplementary material for: A Network Pharmacology-Based Study on Irritable Bowel Syndrome Prevention and Treatment Utilizing Shenling Baizhu Powder
Source: Biomed Res Int. 2021 Nov 23;2021:4579850. doi: 10.1155/2021/4579850 (PMC8632384; doi:10.1155/2021/4579850)
Supplement: Supplementary Materials — Please find detailed data in the supplementary file, including the original data of SymMap, metabolomics, and molecular docking of Shenling Baizhu powder. “Shenling Baizhu powder SymMap” includes all herbal targets and combined targets. “Shenling Baizhu powder metabolomics” includes two-dimensional structural data analysis. “Molecular docking” involves molecule-target docking and the results. [file 4579850.f1.zip › Data in brief/2. Shenling Baizhu powder Metabolomics/2D structure/38.csv]

Target	Common name	Uniprot ID	ChEMBL ID	Target Class	Probability*	Known actives (3D/2D)
Cytochrome P450 19A1	CYP19A1	P11511	CHEMBL1978	Cytochrome P450	1.0	22 / 52
Carbonic anhydrase VII	CA7	P43166	CHEMBL2326	Lyase	1.0	17 / 7
Multidrug resistance-associated protein 1	ABCC1	P33527	CHEMBL3004	Primary active transporter	1.0	2 / 2
Estradiol 17-beta-dehydrogenase 1	HSD17B1	P14061	CHEMBL3181	Enzyme	1.0	113 / 1
Carbonic anhydrase XII	CA12	O43570	CHEMBL3242	Lyase	1.0	45 / 6
Testis-specific androgen-binding protein	SHBG	P04278	CHEMBL3305	Secreted protein	1.0	2 / 2
Carbonic anhydrase IV	CA4	P22748	CHEMBL3729	Lyase	1.0	10 / 7
Cytochrome P450 1B1	CYP1B1	Q16678	CHEMBL4878	Cytochrome P450	1.0	7 / 6
Carbonyl reductase [NADPH] 1	CBR1	P16152	CHEMBL5586	Enzyme	1.0	1 / 1
Estrogen receptor alpha	ESR1	P03372	CHEMBL206	Nuclear receptor	0.567514762729	269 / 86
Estrogen receptor beta	ESR2	Q92731	CHEMBL242	Nuclear receptor	0.567514762729	264 / 78
Cyclooxygenase-1	PTGS1	P23219	CHEMBL221	Oxidoreductase	0.444639417769	10 / 13
Monoamine oxidase B	MAOB	P27338	CHEMBL2039	Oxidoreductase	0.338110309869	13 / 129
Adenosine A1 receptor	ADORA1	P30542	CHEMBL226	Family A G protein-coupled receptor	0.166097445484	13 / 3
Adenosine A3 receptor	ADORA3	P0DMS8	CHEMBL256	Family A G protein-coupled receptor	0.149732593856	5 / 2
ATP-binding cassette sub-family G member 2	ABCG2	Q9UNQ0	CHEMBL5393	Primary active transporter	0.141522086267	3 / 7
Taste receptor type 2 member 31	TAS2R31	P59538	CHEMBL2034804	Taste family G protein-coupled receptor	0.133337961498	1 / 3
Aldo-keto-reductase family 1 member C3	AKR1C3	P42330	CHEMBL4681	Enzyme	0.125142648574	0 / 7
Phospholipase A2 group 1B	PLA2G1B	P04054	CHEMBL4426	Enzyme	0.116965063224	0 / 1
Metabotropic glutamate receptor 5	GRM5	P41594	CHEMBL3227	Family C G protein-coupled receptor	0.116965063224	0 / 10
Acyl coenzyme A:cholesterol acyltransferase	CES1	P23141	CHEMBL2265	Enzyme	0.108770969359	0 / 1
Peroxisome proliferator-activated receptor gamma	PPARG	P37231	CHEMBL235	Nuclear receptor	0.108770969359	0 / 131
Carboxylesterase 2	CES2	O00748	CHEMBL3180	Enzyme	0.108770969359	0 / 1
Matrix metalloproteinase 12	MMP12	P39900	CHEMBL4393	Protease	0.100578902067	12 / 3
Sodium/glucose cotransporter 2	SLC5A2	P31639	CHEMBL3884	Electrochemical transporter	0.100578902067	0 / 6
DNA polymerase beta (by homology)	POLB	P06746	CHEMBL2392	Enzyme	0.100578902067	0 / 2
Matrix metalloproteinase 13	MMP13	P45452	CHEMBL280	Protease	0.100578902067	34 / 2
Phospholipase A2 group IIA	PLA2G2A	P14555	CHEMBL3474	Enzyme	0.100578902067	0 / 8
Phospholipase A2 group V	PLA2G5	P39877	CHEMBL4323	Enzyme	0.100578902067	0 / 3
Group X secretory phospholipase A2	PLA2G10	O15496	CHEMBL4342	Enzyme	0.100578902067	0 / 1
Beta-secretase 1	BACE1	P56817	CHEMBL4822	Protease	0.100578902067	27 / 14
Plasminogen activator inhibitor-1	SERPINE1	P05121	CHEMBL3475	Secreted protein	0.100578902067	8 / 3
Kallikrein 1	KLK1	P06870	CHEMBL2319	Protease	0.100578902067	0 / 1
Kallikrein 2	KLK2	P20151	CHEMBL2442	Protease	0.100578902067	0 / 1
Retinoid X receptor alpha	RXRA	P19793	CHEMBL2061	Nuclear receptor	0.100578902067	0 / 16
Neuronal acetylcholine receptor protein alpha-7 subunit	CHRNA7	P36544	CHEMBL2492	Ligand-gated ion channel	0.100578902067	7 / 0
Tyrosine-protein kinase SRC	SRC	P12931	CHEMBL267	Kinase	0.100578902067	36 / 3
Carbonic anhydrase II	CA2	P00918	CHEMBL205	Lyase	0.100578902067	82 / 4
Carbonic anhydrase I	CA1	P00915	CHEMBL261	Lyase	0.100578902067	70 / 3
Carbonic anhydrase III	CA3	P07451	CHEMBL2885	Lyase	0.100578902067	2 / 3
Carbonic anhydrase VI	CA6	P23280	CHEMBL3025	Lyase	0.100578902067	5 / 2
Carbonic anhydrase XIII	CA13	Q8N1Q1	CHEMBL3912	Lyase	0.100578902067	4 / 3
Carbonic anhydrase VB	CA5B	Q9Y2D0	CHEMBL3969	Lyase	0.100578902067	6 / 2
Carbonic anhydrase VA	CA5A	P35218	CHEMBL4789	Lyase	0.100578902067	7 / 3
Stem cell growth factor receptor	KIT	P10721	CHEMBL1936	Kinase	0.100578902067	4 / 3
Vascular endothelial growth factor receptor 2	KDR	P35968	CHEMBL279	Kinase	0.100578902067	12 / 9
Fibroblast growth factor receptor 1	FGFR1	P11362	CHEMBL3650	Kinase	0.100578902067	3 / 3
Hepatocyte growth factor receptor	MET	P08581	CHEMBL3717	Kinase	0.100578902067	27 / 4
Quinone reductase 2	NQO2	P16083	CHEMBL3959	Enzyme	0.100578902067	5 / 0
17-beta-hydroxysteroid dehydrogenase 14	HSD17B14	Q9BPX1	CHEMBL3712868	Enzyme	0.100578902067	1 / 0
Aldose reductase	AKR1B1	P15121	CHEMBL1900	Enzyme	0.100578902067	33 / 47
Butyrylcholinesterase	BCHE	P06276	CHEMBL1914	Hydrolase	0.100578902067	4 / 3
NADPH oxidase 4	NOX4	Q9NPH5	CHEMBL1250375	Enzyme	0.100578902067	9 / 0
Carbonic anhydrase IX	CA9	Q16790	CHEMBL3594	Lyase	0.100578902067	54 / 1
Insulin-like growth factor I receptor	IGF1R	P08069	CHEMBL1957	Kinase	0.100578902067	18 / 0
Insulin receptor	INSR	P06213	CHEMBL1981	Kinase	0.100578902067	6 / 0
Dual specificty protein kinase CLK1	CLK1	P49759	CHEMBL4224	Kinase	0.100578902067	22 / 0
Dual specificity tyrosine-phosphorylation-regulated kinase 1B	DYRK1B	Q9Y463	CHEMBL5543	Kinase	0.100578902067	19 / 0
Cyclin-dependent kinase 5/CDK5 activator 1	CDK5R1 CDK5	Q15078 Q00535	CHEMBL1907600	Kinase	0.100578902067	13 / 0
Estrogen-related receptor alpha	ESRRA	P11474	CHEMBL3429	Nuclear receptor	0.100578902067	17 / 0
Estrogen-related receptor beta	ESRRB	O95718	CHEMBL3751	Nuclear receptor	0.100578902067	17 / 0
Estradiol 17-beta-dehydrogenase 2	HSD17B2	P37059	CHEMBL2789	Enzyme	0.100578902067	109 / 0
Endothelin receptor ET-A	EDNRA	P25101	CHEMBL252	Family A G protein-coupled receptor	0.100578902067	7 / 28
Dual-specificity tyrosine-phosphorylation regulated kinase 1A	DYRK1A	Q13627	CHEMBL2292	Kinase	0.100578902067	38 / 1
NAD-dependent deacetylase sirtuin 2	SIRT2	Q8IXJ6	CHEMBL4462	Eraser	0.100578902067	0 / 27
Insulin-like growth factor binding protein 3	IGFBP3	P17936	CHEMBL3997	Secreted protein	0.100578902067	1 / 0
Prostanoid EP1 receptor	PTGER1	P34995	CHEMBL1811	Family A G protein-coupled receptor	0.100578902067	0 / 15
Prostanoid EP4 receptor	PTGER4	P35408	CHEMBL1836	Family A G protein-coupled receptor	0.100578902067	0 / 19
Prostanoid EP2 receptor	PTGER2	P43116	CHEMBL1881	Family A G protein-coupled receptor	0.100578902067	0 / 16
Prostanoid EP3 receptor	PTGER3	P43115	CHEMBL3710	Family A G protein-coupled receptor	0.100578902067	0 / 12
PI3-kinase p110-beta subunit	PIK3CB	P42338	CHEMBL3145	Enzyme	0.100578902067	3 / 0
Cytochrome P450 2C9	CYP2C9	P11712	CHEMBL3397	Cytochrome P450	0.100578902067	2 / 0
Cytochrome P450 3A4	CYP3A4	P08684	CHEMBL340	Cytochrome P450	0.100578902067	2 / 0
PI3-kinase p110-alpha subunit	PIK3CA	P42336	CHEMBL4005	Enzyme	0.100578902067	15 / 0
Apoptosis regulator Bcl-X	BCL2L1	Q07817	CHEMBL4625	Other ion channel	0.100578902067	1 / 0
Coagulation factor VII/tissue factor	F3	P13726	CHEMBL4081	Surface antigen	0.100578902067	9 / 0
Adenylate cyclase type V	ADCY5	O95622	CHEMBL3189	Enzyme	0.100578902067	9 / 0
Placenta growth factor	PGF	P49763	CHEMBL1697671	Unclassified protein	0.100578902067	0 / 3
Vascular endothelial growth factor A	VEGFA	P15692	CHEMBL1783	Secreted protein	0.100578902067	0 / 3
Matrix metalloproteinase 2	MMP2	P08253	CHEMBL333	Protease	0.100578902067	87 / 7
14-3-3 protein gamma	YWHAG	P61981	CHEMBL1293296	Unclassified protein	0.100578902067	1 / 0
Cathepsin L	CTSL	P07711	CHEMBL3837	Protease	0.100578902067	3 / 2
Arachidonate 12-lipoxygenase	ALOX12	P18054	CHEMBL3687	Enzyme	0.100578902067	7 / 4
Matrix metalloproteinase 3	MMP3	P08254	CHEMBL283	Protease	0.100578902067	33 / 0
Beta amyloid A4 protein	APP	P05067	CHEMBL2487	Membrane receptor	0.100578902067	13 / 2
Apoptosis regulator Bcl-2	BCL2	P10415	CHEMBL4860	Other ion channel	0.100578902067	8 / 8
Transitional endoplasmic reticulum ATPase	VCP	P55072	CHEMBL1075145	Primary active transporter	0.100578902067	6 / 0
Tyrosine-protein kinase LCK	LCK	P06239	CHEMBL258	Kinase	0.100578902067	21 / 0
Tyrosine-protein kinase SYK	SYK	P43405	CHEMBL2599	Kinase	0.100578902067	7 / 0
Serine/threonine-protein kinase WEE1	WEE1	P30291	CHEMBL5491	Kinase	0.100578902067	61 / 0
Hepatocyte nuclear factor 4-alpha	HNF4A	P41235	CHEMBL5398	Unclassified protein	0.100578902067	0 / 5
Cyclin-dependent kinase 4	CDK4	P11802	CHEMBL331	Kinase	0.0	15 / 0
Cyclin-dependent kinase 2/cyclin E1	CCNE1 CDK2	P24864 P24941	CHEMBL1907605	Kinase	0.0	2 / 0
CDK3/Cyclin E	CCNE1 CDK3	P24864 Q00526	CHEMBL3038471	Kinase	0.0	2 / 0
Serine/threonine-protein kinase Aurora-A	AURKA	O14965	CHEMBL4722	Kinase	0.0	22 / 0
Alpha-synuclein	SNCA	P37840	CHEMBL6152	Unclassified protein	0.0	10 / 0
Serine/threonine-protein kinase/endoribonuclease IRE1	ERN1	O75460	CHEMBL1163101	Enzyme	0.0	27 / 0
Monoamine oxidase A	MAOA	P21397	CHEMBL1951	Oxidoreductase	0.0	9 / 22
Matrix metalloproteinase 9	MMP9	P14780	CHEMBL321	Protease	0.0	92 / 2
Cyclin-dependent kinase 1/cyclin B1	CDK1 CCNB1	P06493 P14635	CHEMBL1907602	Other cytosolic protein	0.0	1 / 0
