# Supplementary material for: A Network Pharmacology-Based Study on Irritable Bowel Syndrome Prevention and Treatment Utilizing Shenling Baizhu Powder
Source: Biomed Res Int. 2021 Nov 23;2021:4579850. doi: 10.1155/2021/4579850 (PMC8632384; doi:10.1155/2021/4579850)
Supplement: Supplementary Materials — Please find detailed data in the supplementary file, including the original data of SymMap, metabolomics, and molecular docking of Shenling Baizhu powder. “Shenling Baizhu powder SymMap” includes all herbal targets and combined targets. “Shenling Baizhu powder metabolomics” includes two-dimensional structural data analysis. “Molecular docking” involves molecule-target docking and the results. [file 4579850.f1.zip › Data in brief/2. Shenling Baizhu powder Metabolomics/2D structure/39.csv]

Target	Common name	Uniprot ID	ChEMBL ID	Target Class	Probability*	Known actives (3D/2D)
Melatonin receptor 1A	MTNR1A	P48039	CHEMBL1945	Family A G protein-coupled receptor	0.100578902067	13 / 0
Melatonin receptor 1B	MTNR1B	P49286	CHEMBL1946	Family A G protein-coupled receptor	0.100578902067	13 / 0
HERG	KCNH2	Q12809	CHEMBL240	Voltage-gated ion channel	0.100578902067	116 / 0
Monoglyceride lipase	MGLL	Q99685	CHEMBL4191	Enzyme	0.100578902067	16 / 0
Acetyl-CoA carboxylase 2	ACACB	O00763	CHEMBL4829	Ligase	0.100578902067	249 / 0
Arachidonate 15-lipoxygenase	ALOX15	P16050	CHEMBL2903	Enzyme	0.0	3 / 0
Transient receptor potential cation channel subfamily A member 1	TRPA1	O75762	CHEMBL6007	Voltage-gated ion channel	0.0	0 / 1
Carbonic anhydrase II	CA2	P00918	CHEMBL205	Lyase	0.0	49 / 0
Carbonic anhydrase VII	CA7	P43166	CHEMBL2326	Lyase	0.0	13 / 0
Carbonic anhydrase I	CA1	P00915	CHEMBL261	Lyase	0.0	47 / 0
Estradiol 17-beta-dehydrogenase 2	HSD17B2	P37059	CHEMBL2789	Enzyme	0.0	9 / 0
Estradiol 17-beta-dehydrogenase 1	HSD17B1	P14061	CHEMBL3181	Enzyme	0.0	11 / 0
Carbonic anhydrase XII	CA12	O43570	CHEMBL3242	Lyase	0.0	32 / 0
Carbonic anhydrase XIV	CA14	Q9ULX7	CHEMBL3510	Lyase	0.0	9 / 0
Carbonic anhydrase IX	CA9	Q16790	CHEMBL3594	Lyase	0.0	36 / 0
Fatty acid synthase	FASN	P49327	CHEMBL4158	Transferase	0.0	14 / 0
15-hydroxyprostaglandin dehydrogenase [NAD+]	HPGD	P15428	CHEMBL1293255	Enzyme	0.0	1 / 0
Deoxycytidine kinase	DCK	P27707	CHEMBL2447	Enzyme	0.0	12 / 0
Vascular endothelial growth factor receptor 2	KDR	P35968	CHEMBL279	Kinase	0.0	70 / 0
LDL-associated phospholipase A2	PLA2G7	Q13093	CHEMBL3514	Enzyme	0.0	17 / 0
Acetyl-CoA carboxylase 1	ACACA	Q13085	CHEMBL3351	Enzyme	0.0	14 / 0
Carbonic anhydrase IV	CA4	P22748	CHEMBL3729	Lyase	0.0	6 / 0
Carbonic anhydrase VA	CA5A	P35218	CHEMBL4789	Lyase	0.0	6 / 0
Steryl-sulfatase	STS	P08842	CHEMBL3559	Enzyme	0.0	21 / 0
DNA-directed DNA/RNA polymerase mu	POLM	Q9NP87	CHEMBL1914260	Enzyme	0.0	1 / 0
DNA polymerase kappa	POLK	Q9UBT6	CHEMBL5365	Enzyme	0.0	2 / 0
DNA polymerase lambda	POLL	Q9UGP5	CHEMBL5367	Enzyme	0.0	1 / 0
DNA polymerase eta	POLH	Q9Y253	CHEMBL5542	Enzyme	0.0	2 / 0
Alpha-1,6-mannosyl-glycoprotein 2-beta-N-acetylglucosaminyltransferase	MGAT2	Q10469	CHEMBL2321630	Enzyme	0.0	7 / 0
Heat shock protein HSP 90-alpha	HSP90AA1	P07900	CHEMBL3880	Other cytosolic protein	0.0	33 / 0
dUTP pyrophosphatase	DUT	P33316	CHEMBL5203	Enzyme	0.0	4 / 0
Diacylglycerol O-acyltransferase 2	DGAT2	Q96PD7	CHEMBL5853	Enzyme	0.0	8 / 0
PI3-kinase p110-delta subunit	PIK3CD	O00329	CHEMBL3130	Enzyme	0.0	4 / 0
PI3-kinase p110-beta subunit	PIK3CB	P42338	CHEMBL3145	Enzyme	0.0	4 / 0
PI3-kinase p110-gamma subunit	PIK3CG	P48736	CHEMBL3267	Enzyme	0.0	3 / 0
PI3-kinase p110-alpha subunit	PIK3CA	P42336	CHEMBL4005	Enzyme	0.0	17 / 0
Platelet activating factor receptor	PTAFR	P25105	CHEMBL250	Family A G protein-coupled receptor	0.0	35 / 0
Matrix metalloproteinase 13	MMP13	P45452	CHEMBL280	Protease	0.0	45 / 0
Muscarinic acetylcholine receptor M2	CHRM2	P08172	CHEMBL211	Family A G protein-coupled receptor	0.0	66 / 0
CDC7/DBF4 (Cell division cycle 7-related protein kinase/Activator of S phase kinase)	CDC7	O00311	CHEMBL5443	Kinase	0.0	1 / 0
Type-1 angiotensin II receptor	AGTR1	P30556	CHEMBL227	Family A G protein-coupled receptor	0.0	6 / 0
Epoxide hydrolase 1	EPHX1	P07099	CHEMBL1968	Protease	0.0	4 / 0
P-glycoprotein 1	ABCB1	P08183	CHEMBL4302	Primary active transporter	0.0	6 / 0
Carnitine O-palmitoyltransferase 1, liver isoform (by homology)	CPT1A	P50416	CHEMBL1293194	Enzyme	0.0	2 / 0
Gamma-secretase	PSEN2 PSENEN NCSTN APH1A PSEN1 APH1B	P49810 Q9NZ42 Q92542 Q96BI3 P49768 Q8WW43	CHEMBL2094135	Protease	0.0	13 / 0
Serine/threonine-protein kinase Chk2	CHEK2	O96017	CHEMBL2527	Kinase	0.0	12 / 0
Urokinase-type plasminogen activator	PLAU	P00749	CHEMBL3286	Protease	0.0	6 / 0
Proteinase-activated receptor 1	F2R	P25116	CHEMBL3974	Family A G protein-coupled receptor	0.0	14 / 0
Calcitonin gene-related peptide type 1 receptor	CALCRL	Q16602	CHEMBL3798	Family B G protein-coupled receptor	0.0	39 / 0
Acyl coenzyme A:cholesterol acyltransferase 1 (by homology)	SOAT1	P35610	CHEMBL2782	Enzyme	0.0	26 / 0
Calcitonin gene-related peptide 1	CALCA	P06881	CHEMBL5293	Unclassified protein	0.0	10 / 0
Probable protein-cysteine N-palmitoyltransferase porcupine	PORCN	Q9H237	CHEMBL1255163	Enzyme	0.0	4 / 0
Cathepsin S	CTSS	P25774	CHEMBL2954	Protease	0.0	9 / 0
Protein-tyrosine phosphatase 1E	PTPN13	Q12923	CHEMBL2976	Phosphatase	0.0	1 / 0
Leukocyte common antigen	PTPRC	P08575	CHEMBL3243	Enzyme	0.0	2 / 0
Cathepsin L	CTSL	P07711	CHEMBL3837	Protease	0.0	7 / 0
Smoothened homolog	SMO	Q99835	CHEMBL5971	Frizzled family G protein-coupled receptor	0.0	10 / 0
Serotonin 1a (5-HT1a) receptor	HTR1A	P08908	CHEMBL214	Family A G protein-coupled receptor	0.0	156 / 0
Dopamine D2 receptor	DRD2	P14416	CHEMBL217	Family A G protein-coupled receptor	0.0	487 / 0
Serotonin 2a (5-HT2a) receptor	HTR2A	P28223	CHEMBL224	Family A G protein-coupled receptor	0.0	224 / 0
Dopamine D3 receptor	DRD3	P35462	CHEMBL234	Family A G protein-coupled receptor	0.0	303 / 0
Poly [ADP-ribose] polymerase-1	PARP1	P09874	CHEMBL3105	Enzyme	0.0	34 / 0
Mammalian target of Rapamycin (mTORC1)	FKBP1A MTOR	P62942 P42345	CHEMBL2221341	Kinase	0.0	4 / 0
Peroxisome proliferator-activated receptor gamma	PPARG	P37231	CHEMBL235	Nuclear receptor	0.0	8 / 0
Protein-glutamine gamma-glutamyltransferase	TGM2	P21980	CHEMBL2730	Enzyme	0.0	14 / 0
NAD-dependent deacetylase sirtuin 3	SIRT3	Q9NTG7	CHEMBL4461	Eraser	0.0	24 / 0
NAD-dependent deacetylase sirtuin 2	SIRT2	Q8IXJ6	CHEMBL4462	Eraser	0.0	33 / 0
Plasminogen	PLG	P00747	CHEMBL1801	Protease	0.0	2 / 0
Tissue-type plasminogen activator	PLAT	P00750	CHEMBL1873	Protease	0.0	2 / 0
Rho-associated protein kinase 2	ROCK2	O75116	CHEMBL2973	Kinase	0.0	28 / 0
Rho-associated protein kinase 1	ROCK1	Q13464	CHEMBL3231	Kinase	0.0	8 / 0
Thrombin	F2	P00734	CHEMBL204	Protease	0.0	27 / 0
Thrombin and coagulation factor X	F10	P00742	CHEMBL244	Protease	0.0	37 / 0
Microtubule-associated protein tau	MAPT	P10636	CHEMBL1293224	Unclassified protein	0.0	5 / 0
Beta amyloid A4 protein	APP	P05067	CHEMBL2487	Membrane receptor	0.0	20 / 0
5-lipoxygenase activating protein	ALOX5AP	P20292	CHEMBL4550	Other cytosolic protein	0.0	54 / 0
Alpha-synuclein	SNCA	P37840	CHEMBL6152	Unclassified protein	0.0	4 / 0
6-phosphofructo-2-kinase/fructose-2,6-bisphosphatase 3	PFKFB3	Q16875	CHEMBL2331053	Enzyme	0.0	32 / 0
Ribosomal protein S6 kinase 1	RPS6KB1	P23443	CHEMBL4501	Kinase	0.0	39 / 0
NAD-dependent deacetylase sirtuin 1	SIRT1	Q96EB6	CHEMBL4506	Eraser	0.0	17 / 0
Serine/threonine-protein kinase Chk1	CHEK1	O14757	CHEMBL4630	Kinase	0.0	22 / 0
Serine/threonine-protein kinase Aurora-A	AURKA	O14965	CHEMBL4722	Kinase	0.0	63 / 0
Rhodopsin kinase	GRK1	Q15835	CHEMBL5607	Kinase	0.0	1 / 0
G protein-coupled receptor kinase 5	GRK5	P34947	CHEMBL5678	Kinase	0.0	1 / 0
Delta opioid receptor	OPRD1	P41143	CHEMBL236	Family A G protein-coupled receptor	0.0	60 / 0
Kappa Opioid receptor	OPRK1	P41145	CHEMBL237	Family A G protein-coupled receptor	0.0	26 / 0
Adenosine A2b receptor	ADORA2B	P29275	CHEMBL255	Family A G protein-coupled receptor	0.0	20 / 0
Nitric-oxide synthase, brain	NOS1	P29475	CHEMBL3568	Enzyme	0.0	4 / 0
Cytosolic phospholipase A2	PLA2G4A	P47712	CHEMBL3816	Enzyme	0.0	5 / 0
Nuclear receptor ROR-gamma	RORC	P51449	CHEMBL1741186	Nuclear receptor	0.0	10 / 0
Serine/threonine-protein kinase Aurora-B	AURKB	Q96GD4	CHEMBL2185	Kinase	0.0	39 / 0
LIM domain kinase 1	LIMK1	P53667	CHEMBL3836	Kinase	0.0	5 / 0
LIM domain kinase 2	LIMK2	P53671	CHEMBL5932	Kinase	0.0	5 / 0
Diacylglycerol O-acyltransferase 1	DGAT1	O75907	CHEMBL6009	Enzyme	0.0	14 / 0
ATP-sensitive inward rectifier potassium channel 1	KCNJ1	P48048	CHEMBL1293292	Voltage-gated ion channel	0.0	13 / 0
Nicotinamide phosphoribosyltransferase	NAMPT	P43490	CHEMBL1744525	Enzyme	0.0	13 / 0
Matrix metalloproteinase 3	MMP3	P08254	CHEMBL283	Protease	0.0	15 / 0
Matrix metalloproteinase 9	MMP9	P14780	CHEMBL321	Protease	0.0	15 / 0
Matrix metalloproteinase 2	MMP2	P08253	CHEMBL333	Protease	0.0	19 / 0
Matrix metalloproteinase 14	MMP14	P50281	CHEMBL3869	Protease	0.0	9 / 0
