# Supplementary material for: A Network Pharmacology-Based Study on Irritable Bowel Syndrome Prevention and Treatment Utilizing Shenling Baizhu Powder
Source: Biomed Res Int. 2021 Nov 23;2021:4579850. doi: 10.1155/2021/4579850 (PMC8632384; doi:10.1155/2021/4579850)
Supplement: Supplementary Materials — Please find detailed data in the supplementary file, including the original data of SymMap, metabolomics, and molecular docking of Shenling Baizhu powder. “Shenling Baizhu powder SymMap” includes all herbal targets and combined targets. “Shenling Baizhu powder metabolomics” includes two-dimensional structural data analysis. “Molecular docking” involves molecule-target docking and the results. [file 4579850.f1.zip › Data in brief/2. Shenling Baizhu powder Metabolomics/2D structure/40.csv]

Target	Common name	Uniprot ID	ChEMBL ID	Target Class	Probability*	Known actives (3D/2D)
Matrix metalloproteinase 9	MMP9	P14780	CHEMBL321	Protease	0.509599763485	400 / 71
Matrix metalloproteinase 1	MMP1	P03956	CHEMBL332	Protease	0.509599763485	420 / 70
Matrix metalloproteinase 2	MMP2	P08253	CHEMBL333	Protease	0.509599763485	479 / 71
Epidermal growth factor receptor erbB1	EGFR	P00533	CHEMBL203	Kinase	0.106099949133	203 / 44
Melatonin receptor 1A	MTNR1A	P48039	CHEMBL1945	Family A G protein-coupled receptor	0.106099949133	20 / 93
Melatonin receptor 1B	MTNR1B	P49286	CHEMBL1946	Family A G protein-coupled receptor	0.106099949133	19 / 55
Dopamine D2 receptor	DRD2	P14416	CHEMBL217	Family A G protein-coupled receptor	0.0978745343258	660 / 110
Dual specificty protein kinase CLK1	CLK1	P49759	CHEMBL4224	Kinase	0.0978745343258	40 / 0
Dual specificity tyrosine-phosphorylation-regulated kinase 1B	DYRK1B	Q9Y463	CHEMBL5543	Kinase	0.0978745343258	32 / 0
Thymidylate synthase	TYMS	P04818	CHEMBL1952	Transferase	0.0978745343258	26 / 0
Estrogen-related receptor alpha	ESRRA	P11474	CHEMBL3429	Nuclear receptor	0.0978745343258	18 / 0
Estrogen-related receptor beta	ESRRB	O95718	CHEMBL3751	Nuclear receptor	0.0978745343258	18 / 0
Transthyretin	TTR	P02766	CHEMBL3194	Secreted protein	0.0978745343258	5 / 0
Arachidonate 15-lipoxygenase	ALOX15	P16050	CHEMBL2903	Enzyme	0.0978745343258	33 / 0
Arachidonate 12-lipoxygenase	ALOX12	P18054	CHEMBL3687	Enzyme	0.0978745343258	15 / 0
Acetylcholinesterase	ACHE	P22303	CHEMBL220	Hydrolase	0.0978745343258	104 / 22
Androgen Receptor (by homology)	AR	P10275	CHEMBL1871	Nuclear receptor	0.0978745343258	67 / 0
Tankyrase-2	TNKS2	Q9H2K2	CHEMBL6154	Enzyme	0.0978745343258	4 / 0
Tankyrase-1	TNKS	O95271	CHEMBL6164	Enzyme	0.0978745343258	4 / 0
Serine/threonine-protein kinase/endoribonuclease IRE1	ERN1	O75460	CHEMBL1163101	Enzyme	0.0978745343258	54 / 0
Beta-secretase 1	BACE1	P56817	CHEMBL4822	Protease	0.0978745343258	255 / 0
Dual specificity protein phosphatase 3	DUSP3	P51452	CHEMBL2635	Phosphatase	0.0978745343258	9 / 0
Cyclin-dependent kinase 1	CDK1	P06493	CHEMBL308	Kinase	0.0978745343258	41 / 0
Myosin light chain kinase, smooth muscle	MYLK	Q15746	CHEMBL2428	Kinase	0.0978745343258	7 / 0
Tyrosinase	TYR	P14679	CHEMBL1973	Oxidoreductase	0.0978745343258	11 / 0
Cytochrome P450 1B1	CYP1B1	Q16678	CHEMBL4878	Cytochrome P450	0.0978745343258	5 / 0
Plasminogen activator inhibitor-1	SERPINE1	P05121	CHEMBL3475	Secreted protein	0.0978745343258	7 / 0
Aminopeptidase N	ANPEP	P15144	CHEMBL1907	Protease	0.0978745343258	21 / 0
Rho-associated protein kinase 1	ROCK1	Q13464	CHEMBL3231	Kinase	0.0978745343258	70 / 0
cAMP-dependent protein kinase alpha-catalytic subunit	PRKACA	P17612	CHEMBL4101	Kinase	0.0978745343258	4 / 0
Cytochrome P450 24A1 (by homology)	CYP24A1	Q07973	CHEMBL4521	Enzyme	0.0978745343258	4 / 0
Butyrylcholinesterase	BCHE	P06276	CHEMBL1914	Hydrolase	0.0978745343258	31 / 18
Insulin receptor	INSR	P06213	CHEMBL1981	Kinase	0.0978745343258	18 / 0
dCTP pyrophosphatase 1	DCTPP1	Q9H773	CHEMBL3769292	Enzyme	0.0978745343258	6 / 0
Tyrosine-protein kinase FYN	FYN	P06241	CHEMBL1841	Kinase	0.0978745343258	10 / 0
Ephrin type-A receptor 2	EPHA2	P29317	CHEMBL2068	Kinase	0.0978745343258	4 / 0
Tyrosine-protein kinase YES	YES1	P07947	CHEMBL2073	Kinase	0.0978745343258	5 / 0
Tyrosine-protein kinase BLK	BLK	P51451	CHEMBL2250	Kinase	0.0978745343258	3 / 0
Tyrosine-protein kinase SYK	SYK	P43405	CHEMBL2599	Kinase	0.0978745343258	44 / 0
Tyrosine-protein kinase CSK	CSK	P41240	CHEMBL2634	Kinase	0.0978745343258	2 / 0
Ephrin type-B receptor 2	EPHB2	P29323	CHEMBL3290	Kinase	0.0978745343258	3 / 0
Tyrosine-protein kinase BMX	BMX	P51813	CHEMBL3834	Kinase	0.0978745343258	3 / 0
Tyrosine-protein kinase Lyn	LYN	P07948	CHEMBL3905	Kinase	0.0978745343258	9 / 0
Ephrin type-A receptor 5	EPHA5	P54756	CHEMBL3987	Kinase	0.0978745343258	4 / 0
Ephrin type-A receptor 4	EPHA4	P54764	CHEMBL3988	Kinase	0.0978745343258	4 / 0
Tyrosine-protein kinase TXK	TXK	P42681	CHEMBL4367	Kinase	0.0978745343258	6 / 0
Tyrosine-protein kinase FGR	FGR	P09769	CHEMBL4454	Kinase	0.0978745343258	3 / 0
Ephrin type-A receptor 6	EPHA6	Q9UF33	CHEMBL4526	Kinase	0.0978745343258	4 / 0
Tyrosine-protein kinase BRK	PTK6	Q13882	CHEMBL4601	Kinase	0.0978745343258	14 / 0
Ephrin type-B receptor 3	EPHB3	P54753	CHEMBL4901	Kinase	0.0978745343258	3 / 0
Ephrin type-A receptor 3	EPHA3	P29320	CHEMBL4954	Kinase	0.0978745343258	5 / 0
Tyrosine-protein kinase BTK	BTK	Q06187	CHEMBL5251	Kinase	0.0978745343258	16 / 0
Tyrosine-protein kinase receptor TYRO3	TYRO3	Q06418	CHEMBL5314	Kinase	0.0978745343258	5 / 0
Uncharacterized aarF domain-containing protein kinase 4	COQ8B	Q96D53	CHEMBL5753	Kinase	0.0978745343258	3 / 0
Ephrin type-A receptor 1	EPHA1	P21709	CHEMBL5810	Kinase	0.0978745343258	3 / 0
Serine/threonine-protein kinase mTOR	MTOR	P42345	CHEMBL2842	Kinase	0.0978745343258	106 / 0
Heat shock protein HSP 90-beta	HSP90AB1	P08238	CHEMBL4303	Other cytosolic protein	0.0978745343258	88 / 0
Leukocyte elastase	ELANE	P08246	CHEMBL248	Protease	0.0978745343258	11 / 0
Phospholipase A2 group IIA	PLA2G2A	P14555	CHEMBL3474	Enzyme	0.0978745343258	13 / 0
Transitional endoplasmic reticulum ATPase	VCP	P55072	CHEMBL1075145	Primary active transporter	0.0978745343258	16 / 0
Cyclin-dependent kinase 5/CDK5 activator 1	CDK5R1 CDK5	Q15078 Q00535	CHEMBL1907600	Kinase	0.0978745343258	53 / 0
Cyclin-dependent kinase 1/cyclin B	CCNB3 CDK1 CCNB1 CCNB2	Q8WWL7 P06493 P14635 O95067	CHEMBL2094127	Other cytosolic protein	0.0978745343258	12 / 0
Glucagon receptor	GCGR	P47871	CHEMBL1985	Family B G protein-coupled receptor	0.0978745343258	16 / 0
Serine/threonine-protein kinase TAO1	TAOK1	Q7L7X3	CHEMBL5261	Kinase	0.0978745343258	5 / 0
Serine/threonine-protein kinase TAO3	TAOK3	Q9H2K8	CHEMBL5701	Kinase	0.0978745343258	5 / 0
Testis-specific androgen-binding protein	SHBG	P04278	CHEMBL3305	Secreted protein	0.0978745343258	9 / 0
Serine/threonine-protein kinase WEE1	WEE1	P30291	CHEMBL5491	Kinase	0.0978745343258	121 / 0
Quinone reductase 2	NQO2	P16083	CHEMBL3959	Enzyme	0.0978745343258	16 / 14
Histone deacetylase 8	HDAC8	Q9BY41	CHEMBL3192	Eraser	0.0978745343258	270 / 12
Cannabinoid receptor 2	CNR2	P34972	CHEMBL253	Family A G protein-coupled receptor	0.0978745343258	30 / 12
Cytochrome P450 17A1	CYP17A1	P05093	CHEMBL3522	Cytochrome P450	0.0978745343258	58 / 0
ADAM17	ADAM17	P78536	CHEMBL3706	Protease	0.0978745343258	213 / 0
Tyrosine-protein kinase ABL	ABL1	P00519	CHEMBL1862	Kinase	0.0978745343258	45 / 0
Tyrosine-protein kinase JAK3	JAK3	P52333	CHEMBL2148	Kinase	0.0978745343258	96 / 0
Tyrosine-protein kinase JAK2	JAK2	O60674	CHEMBL2971	Kinase	0.0978745343258	116 / 0
ALK tyrosine kinase receptor	ALK	Q9UM73	CHEMBL4247	Kinase	0.0978745343258	17 / 0
Mitogen-activated protein kinase kinase kinase kinase 2	MAP4K2	Q12851	CHEMBL5330	Kinase	0.0978745343258	4 / 0
Histone deacetylase 6	HDAC6	Q9UBN7	CHEMBL1865	Eraser	0.0978745343258	384 / 8
Cathepsin D	CTSD	P07339	CHEMBL2581	Protease	0.0978745343258	7 / 0
Sphingosine kinase 2	SPHK2	Q9NRA0	CHEMBL3023	Enzyme	0.0978745343258	6 / 0
Estradiol 17-beta-dehydrogenase 3	HSD17B3	P37058	CHEMBL4234	Enzyme	0.0978745343258	57 / 0
Sphingosine kinase 1	SPHK1	Q9NYA1	CHEMBL4394	Enzyme	0.0978745343258	5 / 0
Apoptosis regulator Bcl-X	BCL2L1	Q07817	CHEMBL4625	Other ion channel	0.0978745343258	6 / 0
Apoptosis regulator Bcl-2	BCL2	P10415	CHEMBL4860	Other ion channel	0.0978745343258	24 / 0
17-beta-hydroxysteroid dehydrogenase 14	HSD17B14	Q9BPX1	CHEMBL3712868	Enzyme	0.0978745343258	1 / 0
Matrix metalloproteinase 8	MMP8	P22894	CHEMBL4588	Protease	0.0978745343258	165 / 0
Pyruvate dehydrogenase kinase isoform 1	PDK1	Q15118	CHEMBL4766	Kinase	0.0978745343258	198 / 0
Acid ceramidase	ASAH1	Q13510	CHEMBL5463	Enzyme	0.0978745343258	7 / 0
MAP kinase p38 alpha	MAPK14	Q16539	CHEMBL260	Kinase	0.0978745343258	102 / 0
Serine/threonine-protein kinase RIPK2	RIPK2	O43353	CHEMBL5014	Kinase	0.0978745343258	9 / 0
Calmodulin	CALM1	P62158	CHEMBL6093	Unclassified protein	0.0978745343258	1 / 0
Histone deacetylase 2	HDAC2	Q92769	CHEMBL1937	Eraser	0.0978745343258	183 / 8
Cyclin-dependent kinase 1/cyclin B1	CDK1 CCNB1	P06493 P14635	CHEMBL1907602	Other cytosolic protein	0.0978745343258	6 / 0
Cyclin-dependent kinase 2/cyclin E1	CCNE1 CDK2	P24864 P24941	CHEMBL1907605	Kinase	0.0978745343258	25 / 0
CDK3/Cyclin E	CCNE1 CDK3	P24864 Q00526	CHEMBL3038471	Kinase	0.0978745343258	15 / 0
PI3-kinase p110-alpha subunit	PIK3CA	P42336	CHEMBL4005	Enzyme	0.0978745343258	142 / 0
G-protein coupled receptor kinase 2	GRK2	P25098	CHEMBL4079	Kinase	0.0978745343258	7 / 0
Cytochrome P450 11B1	CYP11B1	P15538	CHEMBL1908	Cytochrome P450	0.0978745343258	29 / 0
Ribosomal protein S6 kinase alpha 3	RPS6KA3	P51812	CHEMBL2345	Kinase	0.0978745343258	23 / 0
Cytochrome P450 11B2	CYP11B2	P19099	CHEMBL2722	Cytochrome P450	0.0978745343258	32 / 0
