# Supplementary material for: A Network Pharmacology-Based Study on Irritable Bowel Syndrome Prevention and Treatment Utilizing Shenling Baizhu Powder
Source: Biomed Res Int. 2021 Nov 23;2021:4579850. doi: 10.1155/2021/4579850 (PMC8632384; doi:10.1155/2021/4579850)
Supplement: Supplementary Materials — Please find detailed data in the supplementary file, including the original data of SymMap, metabolomics, and molecular docking of Shenling Baizhu powder. “Shenling Baizhu powder SymMap” includes all herbal targets and combined targets. “Shenling Baizhu powder metabolomics” includes two-dimensional structural data analysis. “Molecular docking” involves molecule-target docking and the results. [file 4579850.f1.zip › Data in brief/2. Shenling Baizhu powder Metabolomics/2D structure/42.csv]

Target	Common name	Uniprot ID	ChEMBL ID	Target Class	Probability*	Known actives (3D/2D)
Epidermal growth factor receptor erbB1	EGFR	P00533	CHEMBL203	Kinase	0.624921226338	7 / 16
Estradiol 17-beta-dehydrogenase 2	HSD17B2	P37059	CHEMBL2789	Enzyme	0.188420385827	11 / 3
Estrogen receptor alpha	ESR1	P03372	CHEMBL206	Nuclear receptor	0.171978589411	79 / 72
Estrogen receptor beta	ESR2	Q92731	CHEMBL242	Nuclear receptor	0.171978589411	97 / 59
Arachidonate 12-lipoxygenase	ALOX12	P18054	CHEMBL3687	Enzyme	0.163737226168	10 / 12
Interleukin-2	IL2	P60568	CHEMBL5880	Secreted protein	0.147256737367	0 / 4
Adenosine A1 receptor (by homology)	ADORA1	P30542	CHEMBL226	Family A G protein-coupled receptor	0.147256737367	7 / 19
Adenosine A2a receptor	ADORA2A	P29274	CHEMBL251	Family A G protein-coupled receptor	0.147256737367	6 / 13
Estradiol 17-beta-dehydrogenase 1	HSD17B1	P14061	CHEMBL3181	Enzyme	0.139061946948	11 / 4
Carbonic anhydrase VII	CA7	P43166	CHEMBL2326	Lyase	0.130791955177	8 / 21
Carbonic anhydrase XII	CA12	O43570	CHEMBL3242	Lyase	0.130791955177	13 / 26
Cytochrome P450 19A1	CYP19A1	P11511	CHEMBL1978	Cytochrome P450	0.130791955177	7 / 27
Receptor-type tyrosine-protein phosphatase S	PTPRS	Q13332	CHEMBL2396508	Phosphatase	0.122581769115	4 / 7
Carbonic anhydrase IV	CA4	P22748	CHEMBL3729	Lyase	0.122581769115	9 / 12
Carbonyl reductase [NADPH] 1	CBR1	P16152	CHEMBL5586	Enzyme	0.122581769115	3 / 3
Xanthine dehydrogenase	XDH	P47989	CHEMBL1929	Oxidoreductase	0.114337558605	13 / 20
6-phosphofructo-2-kinase/fructose-2,6-bisphosphatase 3	PFKFB3	Q16875	CHEMBL2331053	Enzyme	0.114337558605	2 / 2
P-glycoprotein 1	ABCB1	P08183	CHEMBL4302	Primary active transporter	0.114337558605	16 / 32
Estrogen-related receptor alpha	ESRRA	P11474	CHEMBL3429	Nuclear receptor	0.114337558605	2 / 2
ATP-binding cassette sub-family G member 2	ABCG2	Q9UNQ0	CHEMBL5393	Primary active transporter	0.114337558605	6 / 42
Monoamine oxidase A	MAOA	P21397	CHEMBL1951	Oxidoreductase	0.106099949133	4 / 56
Tyrosinase	TYR	P14679	CHEMBL1973	Oxidoreductase	0.106099949133	2 / 2
Cyclooxygenase-1	PTGS1	P23219	CHEMBL221	Oxidoreductase	0.106099949133	0 / 2
Norepinephrine transporter	SLC6A2	P23975	CHEMBL222	Electrochemical transporter	0.106099949133	0 / 1
Aldehyde dehydrogenase	ALDH2	P05091	CHEMBL1935	Oxidoreductase	0.106099949133	1 / 41
Thromboxane-A synthase	TBXAS1	P24557	CHEMBL1835	Cytochrome P450	0.106099949133	1 / 1
Maltase-glucoamylase	MGAM	O43451	CHEMBL2074	Hydrolase	0.106099949133	1 / 1
Serotonin 2a (5-HT2a) receptor	HTR2A	P28223	CHEMBL224	Family A G protein-coupled receptor	0.106099949133	1 / 1
Serotonin 2c (5-HT2c) receptor	HTR2C	P28335	CHEMBL225	Family A G protein-coupled receptor	0.106099949133	1 / 2
Estrogen-related receptor beta	ESRRB	O95718	CHEMBL3751	Nuclear receptor	0.106099949133	1 / 1
Acetylcholinesterase	ACHE	P22303	CHEMBL220	Hydrolase	0.0978745343258	4 / 66
Arachidonate 15-lipoxygenase	ALOX15	P16050	CHEMBL2903	Enzyme	0.0978745343258	7 / 9
Macrophage migration inhibitory factor	MIF	P14174	CHEMBL2085	Enzyme	0.0978745343258	1 / 7
Toll-like receptor (TLR7/TLR9)	TLR9	Q9NR96	CHEMBL5804	Toll-like and Il-1 receptors	0.0978745343258	0 / 2
Carbonic anhydrase II	CA2	P00918	CHEMBL205	Lyase	0.0978745343258	15 / 22
Serum paraoxonase/arylesterase 1	PON1	P27169	CHEMBL3167	Enzyme	0.0978745343258	0 / 1
NADPH oxidase 4	NOX4	Q9NPH5	CHEMBL1250375	Enzyme	0.0978745343258	7 / 7
Carbonic anhydrase I	CA1	P00915	CHEMBL261	Lyase	0.0978745343258	7 / 22
Induced myeloid leukemia cell differentiation protein Mcl-1	MCL1	Q07820	CHEMBL4361	Other cytosolic protein	0.0978745343258	5 / 4
Serine/threonine-protein kinase PIM1	PIM1	P11309	CHEMBL2147	Kinase	0.0978745343258	9 / 5
Alpha-synuclein	SNCA	P37840	CHEMBL6152	Unclassified protein	0.0978745343258	2 / 0
Steryl-sulfatase	STS	P08842	CHEMBL3559	Enzyme	0.0978745343258	0 / 3
Peroxisome proliferator-activated receptor alpha	PPARA	Q07869	CHEMBL239	Nuclear receptor	0.0978745343258	1 / 1
Beta-secretase 1	BACE1	P56817	CHEMBL4822	Protease	0.0978745343258	11 / 22
Insulin-like growth factor binding protein 3	IGFBP3	P17936	CHEMBL3997	Secreted protein	0.0978745343258	4 / 0
Aldose reductase (by homology)	AKR1B1	P15121	CHEMBL1900	Enzyme	0.0978745343258	23 / 53
Monoamine oxidase B	MAOB	P27338	CHEMBL2039	Oxidoreductase	0.0978745343258	1 / 112
Carbonic anhydrase VB	CA5B	Q9Y2D0	CHEMBL3969	Lyase	0.0978745343258	0 / 5
Endoplasmin	HSP90B1	P14625	CHEMBL1075323	Other membrane protein	0.0978745343258	10 / 0
Troponin, cardiac muscle	TNNC1 TNNT2 TNNI3	P63316 P45379 P19429	CHEMBL2095202	Unclassified protein	0.0978745343258	2 / 0
Heat shock protein HSP 90-alpha	HSP90AA1	P07900	CHEMBL3880	Other cytosolic protein	0.0978745343258	18 / 0
Insulin-like growth factor binding protein 6	IGFBP6	P24592	CHEMBL2139	Secreted protein	0.0978745343258	2 / 0
Insulin-like growth factor binding protein 4	IGFBP4	P22692	CHEMBL2310	Secreted protein	0.0978745343258	2 / 0
Insulin-like growth factor binding protein 5	IGFBP5	P24593	CHEMBL2665	Secreted protein	0.0978745343258	2 / 0
Insulin-like growth factor binding protein 2	IGFBP2	P18065	CHEMBL3088	Secreted protein	0.0978745343258	2 / 0
Insulin-like growth factor binding protein 1	IGFBP1	P08833	CHEMBL4178	Secreted protein	0.0978745343258	2 / 0
Protein-arginine N-methyltransferase 1	PRMT1	Q99873	CHEMBL5524	Writer	0.0	1 / 0
Carbonic anhydrase IX	CA9	Q16790	CHEMBL3594	Lyase	0.0	6 / 21
Insulin-like growth factor I receptor	IGF1R	P08069	CHEMBL1957	Kinase	0.0	4 / 2
Bcl2-antagonist of cell death (BAD)	BAD	Q92934	CHEMBL3817	Other cytosolic protein	0.0	0 / 1
Serine/threonine-protein kinase Chk1	CHEK1	O14757	CHEMBL4630	Kinase	0.0	2 / 0
Serine/threonine-protein kinase WEE1	WEE1	P30291	CHEMBL5491	Kinase	0.0	2 / 0
Dihydroorotate dehydrogenase (by homology)	DHODH	Q02127	CHEMBL1966	Oxidoreductase	0.0	2 / 0
Corticotropin releasing factor receptor 1	CRHR1	P34998	CHEMBL1800	Family B G protein-coupled receptor	0.0	1 / 0
Arachidonate 5-lipoxygenase	ALOX5	P09917	CHEMBL215	Oxidoreductase	0.0	5 / 45
Telomerase reverse transcriptase	TERT	O14746	CHEMBL2916	Enzyme	0.0	9 / 7
Heat shock protein HSP 90-beta	HSP90AB1	P08238	CHEMBL4303	Other cytosolic protein	0.0	8 / 0
Tyrosine-protein kinase receptor FLT3	FLT3	P36888	CHEMBL1974	Kinase	0.0	6 / 6
Trypsin I	PRSS1	P07477	CHEMBL209	Protease	0.0	4 / 0
Thrombin and coagulation factor X	F10	P00742	CHEMBL244	Protease	0.0	12 / 0
Urokinase-type plasminogen activator	PLAU	P00749	CHEMBL3286	Protease	0.0	13 / 0
Calcium-activated potassium channel subunit alpha-1	KCNMA1	Q12791	CHEMBL4304	Voltage-gated ion channel	0.0	5 / 0
G protein-coupled receptor kinase 6	GRK6	P43250	CHEMBL6144	Kinase	0.0	3 / 4
Phosphodiesterase 10A	PDE10A	Q9Y233	CHEMBL4409	Phosphodiesterase	0.0	3 / 0
CDC7/DBF4 (Cell division cycle 7-related protein kinase/Activator of S phase kinase)	CDC7	O00311	CHEMBL5443	Kinase	0.0	1 / 0
Tissue-type plasminogen activator	PLAT	P00750	CHEMBL1873	Protease	0.0	8 / 0
Carbonic anhydrase III	CA3	P07451	CHEMBL2885	Lyase	0.0	1 / 6
Carbonic anhydrase VI	CA6	P23280	CHEMBL3025	Lyase	0.0	3 / 5
Carbonic anhydrase XIV	CA14	Q9ULX7	CHEMBL3510	Lyase	0.0	1 / 9
Carbonic anhydrase XIII	CA13	Q8N1Q1	CHEMBL3912	Lyase	0.0	1 / 14
Carbonic anhydrase VA	CA5A	P35218	CHEMBL4789	Lyase	0.0	1 / 5
Protein-tyrosine phosphatase 1B	PTPN1	P18031	CHEMBL335	Phosphatase	0.0	6 / 16
Heat shock 70 kDa protein 1	HSPA1A	P0DMV8	CHEMBL5460	Other cytosolic protein	0.0	3 / 0
Protein kinase C alpha	PRKCA	P17252	CHEMBL299	Kinase	0.0	1 / 0
Protein kinase C beta	PRKCB	P05771	CHEMBL3045	Kinase	0.0	1 / 0
Protein kinase C epsilon	PRKCE	Q02156	CHEMBL3582	Kinase	0.0	1 / 0
Glucagon receptor	GCGR	P47871	CHEMBL1985	Family B G protein-coupled receptor	0.0	8 / 0
Cyclooxygenase-2	PTGS2	P35354	CHEMBL230	Oxidoreductase	0.0	2 / 8
Heat shock cognate 71 kDa protein	HSPA8	P11142	CHEMBL1275223	Other cytosolic protein	0.0	2 / 0
Egl nine homolog 1	EGLN1	Q9GZT9	CHEMBL5697	Oxidoreductase	0.0	4 / 0
Protein farnesyltransferase	FNTA FNTB	P49354 P49356	CHEMBL2094108	Enzyme	0.0	1 / 0
Stem cell growth factor receptor	KIT	P10721	CHEMBL1936	Kinase	0.0	1 / 2
Delta opioid receptor	OPRD1	P41143	CHEMBL236	Family A G protein-coupled receptor	0.0	2 / 5
AMY1C	AMY1A	P04745	CHEMBL2478	Enzyme	0.0	1 / 1
Cytochrome P450 1B1	CYP1B1	Q16678	CHEMBL4878	Cytochrome P450	0.0	12 / 35
Catechol O-methyltransferase (by homology)	COMT	P21964	CHEMBL2023	Transferase	0.0	14 / 0
Alkaline phosphatase, tissue-nonspecific isozyme	ALPL	P05186	CHEMBL5979	Enzyme	0.0	1 / 0
Lysine-specific demethylase 4C	KDM4C	Q9H3R0	CHEMBL6175	Eraser	0.0	1 / 0
Dual specificity protein phosphatase 3	DUSP3	P51452	CHEMBL2635	Phosphatase	0.0	2 / 0
Dual specificity phosphatase Cdc25B	CDC25B	P30305	CHEMBL4804	Phosphatase	0.0	2 / 0
