# Supplementary material for: A Network Pharmacology-Based Study on Irritable Bowel Syndrome Prevention and Treatment Utilizing Shenling Baizhu Powder
Source: Biomed Res Int. 2021 Nov 23;2021:4579850. doi: 10.1155/2021/4579850 (PMC8632384; doi:10.1155/2021/4579850)
Supplement: Supplementary Materials — Please find detailed data in the supplementary file, including the original data of SymMap, metabolomics, and molecular docking of Shenling Baizhu powder. “Shenling Baizhu powder SymMap” includes all herbal targets and combined targets. “Shenling Baizhu powder metabolomics” includes two-dimensional structural data analysis. “Molecular docking” involves molecule-target docking and the results. [file 4579850.f1.zip › Data in brief/2. Shenling Baizhu powder Metabolomics/2D structure/43.csv]

Target	Common name	Uniprot ID	ChEMBL ID	Target Class	Probability*	Known actives (3D/2D)
Cytochrome P450 19A1	CYP19A1	P11511	CHEMBL1978	Cytochrome P450	0.320218721084	7 / 26
Carbonic anhydrase VII	CA7	P43166	CHEMBL2326	Lyase	0.320218721084	8 / 15
Estradiol 17-beta-dehydrogenase 2	HSD17B2	P37059	CHEMBL2789	Enzyme	0.320218721084	10 / 4
Carbonic anhydrase XII	CA12	O43570	CHEMBL3242	Lyase	0.320218721084	10 / 20
Carbonic anhydrase IV	CA4	P22748	CHEMBL3729	Lyase	0.320218721084	7 / 12
Carbonyl reductase [NADPH] 1	CBR1	P16152	CHEMBL5586	Enzyme	0.320218721084	2 / 3
P-glycoprotein 1	ABCB1	P08183	CHEMBL4302	Primary active transporter	0.204881979723	12 / 30
Tyrosinase (by homology)	TYR	P14679	CHEMBL1973	Oxidoreductase	0.155528102326	2 / 2
Macrophage migration inhibitory factor	MIF	P14174	CHEMBL2085	Enzyme	0.155528102326	2 / 7
Peroxisome proliferator-activated receptor alpha	PPARA	Q07869	CHEMBL239	Nuclear receptor	0.139061946948	1 / 1
Estradiol 17-beta-dehydrogenase 1	HSD17B1	P14061	CHEMBL3181	Enzyme	0.122581769115	10 / 5
Estrogen receptor alpha	ESR1	P03372	CHEMBL206	Nuclear receptor	0.114337558605	59 / 62
Estrogen receptor beta	ESR2	Q92731	CHEMBL242	Nuclear receptor	0.114337558605	65 / 50
Toll-like receptor (TLR7/TLR9)	TLR9	Q9NR96	CHEMBL5804	Toll-like and Il-1 receptors	0.114337558605	0 / 2
Receptor-type tyrosine-protein phosphatase S	PTPRS	Q13332	CHEMBL2396508	Phosphatase	0.106099949133	2 / 7
Epidermal growth factor receptor erbB1	EGFR	P00533	CHEMBL203	Kinase	0.106099949133	8 / 16
Monoamine oxidase B	MAOB	P27338	CHEMBL2039	Oxidoreductase	0.106099949133	0 / 96
Cyclooxygenase-1	PTGS1	P23219	CHEMBL221	Oxidoreductase	0.106099949133	0 / 4
Norepinephrine transporter	SLC6A2	P23975	CHEMBL222	Electrochemical transporter	0.106099949133	0 / 1
Arachidonate 12-lipoxygenase	ALOX12	P18054	CHEMBL3687	Enzyme	0.106099949133	9 / 12
Aldehyde dehydrogenase	ALDH2	P05091	CHEMBL1935	Oxidoreductase	0.0978745343258	1 / 42
Xanthine dehydrogenase	XDH	P47989	CHEMBL1929	Oxidoreductase	0.0978745343258	12 / 19
Interleukin-2	IL2	P60568	CHEMBL5880	Secreted protein	0.0978745343258	1 / 4
Thromboxane-A synthase	TBXAS1	P24557	CHEMBL1835	Cytochrome P450	0.0978745343258	1 / 1
Monoamine oxidase A	MAOA	P21397	CHEMBL1951	Oxidoreductase	0.0978745343258	5 / 40
Maltase-glucoamylase	MGAM	O43451	CHEMBL2074	Hydrolase	0.0978745343258	1 / 1
Serotonin 2a (5-HT2a) receptor	HTR2A	P28223	CHEMBL224	Family A G protein-coupled receptor	0.0978745343258	1 / 1
Serotonin 2c (5-HT2c) receptor	HTR2C	P28335	CHEMBL225	Family A G protein-coupled receptor	0.0978745343258	1 / 2
Adenosine A1 receptor (by homology)	ADORA1	P30542	CHEMBL226	Family A G protein-coupled receptor	0.0978745343258	7 / 17
Adenosine A2a receptor	ADORA2A	P29274	CHEMBL251	Family A G protein-coupled receptor	0.0978745343258	6 / 12
Estrogen-related receptor alpha	ESRRA	P11474	CHEMBL3429	Nuclear receptor	0.0978745343258	2 / 2
Estrogen-related receptor beta	ESRRB	O95718	CHEMBL3751	Nuclear receptor	0.0978745343258	1 / 1
ATP-binding cassette sub-family G member 2	ABCG2	Q9UNQ0	CHEMBL5393	Primary active transporter	0.0978745343258	6 / 41
Carbonic anhydrase II	CA2	P00918	CHEMBL205	Lyase	0.0978745343258	15 / 21
6-phosphofructo-2-kinase/fructose-2,6-bisphosphatase 3	PFKFB3	Q16875	CHEMBL2331053	Enzyme	0.0978745343258	1 / 2
NADPH oxidase 4	NOX4	Q9NPH5	CHEMBL1250375	Enzyme	0.0978745343258	5 / 7
Arachidonate 15-lipoxygenase	ALOX15	P16050	CHEMBL2903	Enzyme	0.0978745343258	6 / 9
Carbonic anhydrase I	CA1	P00915	CHEMBL261	Lyase	0.0978745343258	4 / 20
Protein-tyrosine phosphatase 1B	PTPN1	P18031	CHEMBL335	Phosphatase	0.0978745343258	5 / 18
Serum paraoxonase/arylesterase 1	PON1	P27169	CHEMBL3167	Enzyme	0.0978745343258	0 / 1
Dual specificity protein phosphatase 3	DUSP3	P51452	CHEMBL2635	Phosphatase	0.0978745343258	1 / 0
Dual specificity phosphatase Cdc25B	CDC25B	P30305	CHEMBL4804	Phosphatase	0.0978745343258	2 / 0
CDC7/DBF4 (Cell division cycle 7-related protein kinase/Activator of S phase kinase)	CDC7	O00311	CHEMBL5443	Kinase	0.0978745343258	1 / 0
Acetylcholinesterase	ACHE	P22303	CHEMBL220	Hydrolase	0.0978745343258	4 / 51
Multidrug resistance-associated protein 1	ABCC1	P33527	CHEMBL3004	Primary active transporter	0.0978745343258	7 / 10
Cytochrome P450 1B1	CYP1B1	Q16678	CHEMBL4878	Cytochrome P450	0.0978745343258	12 / 25
Tissue-type plasminogen activator	PLAT	P00750	CHEMBL1873	Protease	0.0978745343258	8 / 0
Thrombin and coagulation factor X	F10	P00742	CHEMBL244	Protease	0.0978745343258	9 / 0
Urokinase-type plasminogen activator	PLAU	P00749	CHEMBL3286	Protease	0.0978745343258	12 / 0
Steryl-sulfatase	STS	P08842	CHEMBL3559	Enzyme	0.0978745343258	0 / 4
Carbonic anhydrase VB	CA5B	Q9Y2D0	CHEMBL3969	Lyase	0.0978745343258	0 / 3
Heat shock protein HSP 90-beta	HSP90AB1	P08238	CHEMBL4303	Other cytosolic protein	0.0978745343258	6 / 0
Tyrosine-protein kinase BRK	PTK6	Q13882	CHEMBL4601	Kinase	0.0	1 / 0
TNF-alpha	TNF	P01375	CHEMBL1825	Secreted protein	0.0	0 / 1
Thromboxane A2 receptor	TBXA2R	P21731	CHEMBL2069	Family A G protein-coupled receptor	0.0	1 / 0
Induced myeloid leukemia cell differentiation protein Mcl-1	MCL1	Q07820	CHEMBL4361	Other cytosolic protein	0.0	5 / 4
Interleukin-8 receptor B	CXCR2	P25025	CHEMBL2434	Family A G protein-coupled receptor	0.0	2 / 0
Beta-secretase 1	BACE1	P56817	CHEMBL4822	Protease	0.0	10 / 17
Insulin-like growth factor binding protein 3	IGFBP3	P17936	CHEMBL3997	Secreted protein	0.0	2 / 0
Aldose reductase	AKR1B1	P15121	CHEMBL1900	Enzyme	0.0	11 / 53
Bcl2-antagonist of cell death (BAD)	BAD	Q92934	CHEMBL3817	Other cytosolic protein	0.0	0 / 1
Plasminogen	PLG	P00747	CHEMBL1801	Protease	0.0	6 / 2
C-C chemokine receptor type 4	CCR4	P51679	CHEMBL2414	Family A G protein-coupled receptor	0.0	2 / 0
Serine/threonine-protein kinase Chk1	CHEK1	O14757	CHEMBL4630	Kinase	0.0	7 / 0
Serine/threonine-protein kinase WEE1	WEE1	P30291	CHEMBL5491	Kinase	0.0	2 / 0
Protein-arginine N-methyltransferase 1	PRMT1	Q99873	CHEMBL5524	Writer	0.0	1 / 0
Carbonic anhydrase IX	CA9	Q16790	CHEMBL3594	Lyase	0.0	4 / 14
Alpha-synuclein	SNCA	P37840	CHEMBL6152	Unclassified protein	0.0	1 / 0
Glucagon receptor	GCGR	P47871	CHEMBL1985	Family B G protein-coupled receptor	0.0	8 / 0
Plasma kallikrein	KLKB1	P03952	CHEMBL2000	Protease	0.0	1 / 0
Adrenergic receptor beta	ADRB2	P07550	CHEMBL210	Family A G protein-coupled receptor	0.0	11 / 0
Serine/threonine-protein kinase RAF	RAF1	P04049	CHEMBL1906	Kinase	0.0	6 / 0
Nerve growth factor receptor Trk-A	NTRK1	P04629	CHEMBL2815	Kinase	0.0	1 / 0
Serine/threonine-protein kinase PIM2	PIM2	Q9P1W9	CHEMBL4523	Kinase	0.0	2 / 0
Serine/threonine-protein kinase B-raf	BRAF	P15056	CHEMBL5145	Kinase	0.0	1 / 0
Serine/threonine-protein kinase PIM3	PIM3	Q86V86	CHEMBL5407	Kinase	0.0	2 / 0
Endoplasmin	HSP90B1	P14625	CHEMBL1075323	Other membrane protein	0.0	4 / 0
Lysine-specific histone demethylase 1	KDM1A	O60341	CHEMBL6136	Eraser	0.0	1 / 0
Troponin, cardiac muscle	TNNC1 TNNT2 TNNI3	P63316 P45379 P19429	CHEMBL2095202	Unclassified protein	0.0	1 / 0
Beta-1 adrenergic receptor	ADRB1	P08588	CHEMBL213	Family A G protein-coupled receptor	0.0	10 / 0
Insulin-like growth factor binding protein 6	IGFBP6	P24592	CHEMBL2139	Secreted protein	0.0	1 / 0
Insulin-like growth factor binding protein 4	IGFBP4	P22692	CHEMBL2310	Secreted protein	0.0	1 / 0
Insulin-like growth factor binding protein 5	IGFBP5	P24593	CHEMBL2665	Secreted protein	0.0	1 / 0
Insulin-like growth factor binding protein 2	IGFBP2	P18065	CHEMBL3088	Secreted protein	0.0	1 / 0
Neurotensin receptor 3	SORT1	Q99523	CHEMBL3091	Membrane receptor	0.0	1 / 0
Insulin-like growth factor binding protein 1	IGFBP1	P08833	CHEMBL4178	Secreted protein	0.0	1 / 0
Peroxisome proliferator-activated receptor gamma	PPARG	P37231	CHEMBL235	Nuclear receptor	0.0	0 / 2
Protein-tyrosine phosphatase 4A3	PTP4A3	O75365	CHEMBL4162	Phosphatase	0.0	1 / 0
Alkaline phosphatase, tissue-nonspecific isozyme	ALPL	P05186	CHEMBL5979	Enzyme	0.0	1 / 0
Glutamate [NMDA] receptor subunit epsilon 2	GRIN2B	Q13224	CHEMBL1904	Ligand-gated ion channel	0.0	5 / 0
Heat shock protein HSP 90-alpha	HSP90AA1	P07900	CHEMBL3880	Other cytosolic protein	0.0	13 / 0
Arachidonate 5-lipoxygenase	ALOX5	P09917	CHEMBL215	Oxidoreductase	0.0	4 / 43
Carbonic anhydrase III	CA3	P07451	CHEMBL2885	Lyase	0.0	1 / 5
Carbonic anhydrase VI	CA6	P23280	CHEMBL3025	Lyase	0.0	1 / 5
Carbonic anhydrase XIV	CA14	Q9ULX7	CHEMBL3510	Lyase	0.0	1 / 7
Carbonic anhydrase XIII	CA13	Q8N1Q1	CHEMBL3912	Lyase	0.0	1 / 9
Carbonic anhydrase VA	CA5A	P35218	CHEMBL4789	Lyase	0.0	1 / 5
Corticotropin releasing factor receptor 1	CRHR1	P34998	CHEMBL1800	Family B G protein-coupled receptor	0.0	1 / 0
Serine/threonine-protein kinase Chk2	CHEK2	O96017	CHEMBL2527	Kinase	0.0	12 / 0
G-protein coupled receptor 84	GPR84	Q9NQS5	CHEMBL3714079	Family A G protein-coupled receptor	0.0	2 / 0
