# Supplementary material for: A Network Pharmacology-Based Study on Irritable Bowel Syndrome Prevention and Treatment Utilizing Shenling Baizhu Powder
Source: Biomed Res Int. 2021 Nov 23;2021:4579850. doi: 10.1155/2021/4579850 (PMC8632384; doi:10.1155/2021/4579850)
Supplement: Supplementary Materials — Please find detailed data in the supplementary file, including the original data of SymMap, metabolomics, and molecular docking of Shenling Baizhu powder. “Shenling Baizhu powder SymMap” includes all herbal targets and combined targets. “Shenling Baizhu powder metabolomics” includes two-dimensional structural data analysis. “Molecular docking” involves molecule-target docking and the results. [file 4579850.f1.zip › Data in brief/2. Shenling Baizhu powder Metabolomics/2D structure/44.csv]

Target	Common name	Uniprot ID	ChEMBL ID	Target Class	Probability*	Known actives (3D/2D)
Aldehyde dehydrogenase	ALDH2	P05091	CHEMBL1935	Oxidoreductase	1.0	6 / 42
Estradiol 17-beta-dehydrogenase 2	HSD17B2	P37059	CHEMBL2789	Enzyme	0.33673963307	51 / 3
ATP-binding cassette sub-family G member 2	ABCG2	Q9UNQ0	CHEMBL5393	Primary active transporter	0.254289911931	31 / 37
Estradiol 17-beta-dehydrogenase 1	HSD17B1	P14061	CHEMBL3181	Enzyme	0.21312592269	51 / 4
Carbonyl reductase [NADPH] 1	CBR1	P16152	CHEMBL5586	Enzyme	0.204881979723	0 / 3
Estrogen receptor alpha	ESR1	P03372	CHEMBL206	Nuclear receptor	0.180252493891	40 / 67
Estrogen receptor beta	ESR2	Q92731	CHEMBL242	Nuclear receptor	0.180252493891	43 / 54
Carbonic anhydrase VII	CA7	P43166	CHEMBL2326	Lyase	0.171978589411	22 / 22
Carbonic anhydrase XII	CA12	O43570	CHEMBL3242	Lyase	0.171978589411	91 / 33
Carbonic anhydrase IV	CA4	P22748	CHEMBL3729	Lyase	0.171978589411	10 / 13
Epidermal growth factor receptor erbB1	EGFR	P00533	CHEMBL203	Kinase	0.171978589411	87 / 26
Interleukin-2	IL2	P60568	CHEMBL5880	Secreted protein	0.171978589411	0 / 4
Adenosine A1 receptor	ADORA1	P30542	CHEMBL226	Family A G protein-coupled receptor	0.147256737367	96 / 21
Estrogen-related receptor alpha	ESRRA	P11474	CHEMBL3429	Nuclear receptor	0.139061946948	0 / 2
Estrogen-related receptor beta	ESRRB	O95718	CHEMBL3751	Nuclear receptor	0.139061946948	0 / 1
Monoamine oxidase A	MAOA	P21397	CHEMBL1951	Oxidoreductase	0.130791955177	35 / 64
Adenosine A2a receptor	ADORA2A	P29274	CHEMBL251	Family A G protein-coupled receptor	0.130791955177	89 / 14
Cytochrome P450 19A1	CYP19A1	P11511	CHEMBL1978	Cytochrome P450	0.122581769115	8 / 28
P-glycoprotein 1	ABCB1	P08183	CHEMBL4302	Primary active transporter	0.114337558605	10 / 36
Serotonin 2a (5-HT2a) receptor	HTR2A	P28223	CHEMBL224	Family A G protein-coupled receptor	0.106099949133	18 / 2
Cyclooxygenase-1	PTGS1	P23219	CHEMBL221	Oxidoreductase	0.106099949133	10 / 2
Macrophage migration inhibitory factor	MIF	P14174	CHEMBL2085	Enzyme	0.106099949133	19 / 7
Receptor-type tyrosine-protein phosphatase S	PTPRS	Q13332	CHEMBL2396508	Phosphatase	0.106099949133	0 / 7
Norepinephrine transporter	SLC6A2	P23975	CHEMBL222	Electrochemical transporter	0.106099949133	2 / 1
Monoamine oxidase B	MAOB	P27338	CHEMBL2039	Oxidoreductase	0.106099949133	47 / 130
6-phosphofructo-2-kinase/fructose-2,6-bisphosphatase 3	PFKFB3	Q16875	CHEMBL2331053	Enzyme	0.0978745343258	16 / 2
Carbonic anhydrase II	CA2	P00918	CHEMBL205	Lyase	0.0978745343258	164 / 25
Carbonic anhydrase I	CA1	P00915	CHEMBL261	Lyase	0.0978745343258	142 / 26
Maltase-glucoamylase	MGAM	O43451	CHEMBL2074	Hydrolase	0.0978745343258	3 / 1
Serotonin 2c (5-HT2c) receptor	HTR2C	P28335	CHEMBL225	Family A G protein-coupled receptor	0.0978745343258	9 / 2
Thromboxane-A synthase	TBXAS1	P24557	CHEMBL1835	Cytochrome P450	0.0978745343258	1 / 1
Tyrosinase	TYR	P14679	CHEMBL1973	Oxidoreductase	0.0978745343258	2 / 2
Arachidonate 12-lipoxygenase	ALOX12	P18054	CHEMBL3687	Enzyme	0.0978745343258	1 / 12
Arachidonate 15-lipoxygenase	ALOX15	P16050	CHEMBL2903	Enzyme	0.0978745343258	6 / 9
Xanthine dehydrogenase	XDH	P47989	CHEMBL1929	Oxidoreductase	0.0978745343258	3 / 19
NADPH oxidase 4	NOX4	Q9NPH5	CHEMBL1250375	Enzyme	0.0978745343258	9 / 7
Serine/threonine-protein kinase Chk1	CHEK1	O14757	CHEMBL4630	Kinase	0.0978745343258	68 / 0
Serine/threonine-protein kinase WEE1	WEE1	P30291	CHEMBL5491	Kinase	0.0978745343258	59 / 0
Serum paraoxonase/arylesterase 1	PON1	P27169	CHEMBL3167	Enzyme	0.0978745343258	0 / 1
Lysine-specific histone demethylase 1	KDM1A	O60341	CHEMBL6136	Eraser	0.0978745343258	7 / 0
Ezrin	EZR	P15311	CHEMBL1932896	Unclassified protein	0.0978745343258	2 / 0
Neuronal acetylcholine receptor protein alpha-7 subunit	CHRNA7	P36544	CHEMBL2492	Ligand-gated ion channel	0.0978745343258	12 / 0
Phospholipase A-2-activating protein	PLAA	Q9Y263	CHEMBL6114	Unclassified protein	0.0978745343258	5 / 0
Matrix metalloproteinase 1	MMP1	P03956	CHEMBL332	Protease	0.0978745343258	396 / 0
Serine/threonine-protein kinase mTOR	MTOR	P42345	CHEMBL2842	Kinase	0.0978745343258	72 / 0
PI3-kinase p110-alpha subunit	PIK3CA	P42336	CHEMBL4005	Enzyme	0.0978745343258	175 / 0
Acetylcholinesterase	ACHE	P22303	CHEMBL220	Hydrolase	0.0978745343258	13 / 69
Beta-glucuronidase	GUSB	P08236	CHEMBL2728	Enzyme	0.0978745343258	3 / 0
Toll-like receptor (TLR7/TLR9)	TLR9	Q9NR96	CHEMBL5804	Toll-like and Il-1 receptors	0.0978745343258	6 / 2
Receptor protein-tyrosine kinase erbB-2	ERBB2	P04626	CHEMBL1824	Kinase	0.0978745343258	15 / 0
Serine/threonine-protein kinase Aurora-A	AURKA	O14965	CHEMBL4722	Kinase	0.0978745343258	109 / 0
Carbonic anhydrase III	CA3	P07451	CHEMBL2885	Lyase	0.0978745343258	0 / 8
Glycogen synthase kinase-3 alpha	GSK3A	P49840	CHEMBL2850	Kinase	0.0978745343258	13 / 0
Signal transducer and activator of transcription 3	STAT3	P40763	CHEMBL4026	Transcription factor	0.0978745343258	5 / 0
Alkaline phosphatase, tissue-nonspecific isozyme	ALPL	P05186	CHEMBL5979	Enzyme	0.0978745343258	22 / 0
Induced myeloid leukemia cell differentiation protein Mcl-1	MCL1	Q07820	CHEMBL4361	Other cytosolic protein	0.0978745343258	11 / 4
Beta-secretase 1	BACE1	P56817	CHEMBL4822	Protease	0.0978745343258	57 / 18
Serine/threonine-protein kinase PIM2	PIM2	Q9P1W9	CHEMBL4523	Kinase	0.0978745343258	15 / 0
PI3-kinase p110-delta subunit	PIK3CD	O00329	CHEMBL3130	Enzyme	0.0978745343258	76 / 0
Aldose reductase (by homology)	AKR1B1	P15121	CHEMBL1900	Enzyme	0.0978745343258	53 / 55
Hematopoietic prostaglandin D synthase	HPGDS	O60760	CHEMBL5879	Transferase	0.0978745343258	2 / 0
Carbonic anhydrase IX	CA9	Q16790	CHEMBL3594	Lyase	0.0978745343258	105 / 36
Histone deacetylase 1	HDAC1	Q13547	CHEMBL325	Eraser	0.0978745343258	179 / 0
Serine/threonine-protein kinase MARK1	MARK1	Q9P0L2	CHEMBL5940	Kinase	0.0978745343258	2 / 0
Kinesin-1 heavy chain/ Tyrosine-protein kinase receptor RET	RET	P07949	CHEMBL2041	Kinase	0.0978745343258	52 / 0
Phosphodiesterase 7A	PDE7A	Q13946	CHEMBL3012	Phosphodiesterase	0.0978745343258	9 / 0
PI3-kinase p110-beta subunit	PIK3CB	P42338	CHEMBL3145	Enzyme	0.0978745343258	62 / 0
3-phosphoinositide dependent protein kinase-1	PDPK1	O15530	CHEMBL2534	Kinase	0.0978745343258	11 / 0
Dual specificity phosphatase Cdc25A	CDC25A	P30304	CHEMBL3775	Phosphatase	0.0978745343258	11 / 0
Matrix metalloproteinase 8	MMP8	P22894	CHEMBL4588	Protease	0.0978745343258	159 / 0
Tyrosine-protein kinase BRK	PTK6	Q13882	CHEMBL4601	Kinase	0.0978745343258	13 / 0
Dual specificity phosphatase Cdc25B	CDC25B	P30305	CHEMBL4804	Phosphatase	0.0978745343258	11 / 0
Tyrosine-protein kinase JAK3	JAK3	P52333	CHEMBL2148	Kinase	0.0	17 / 0
ADAM17	ADAM17	P78536	CHEMBL3706	Protease	0.0	204 / 0
Arachidonate 5-lipoxygenase	ALOX5	P09917	CHEMBL215	Oxidoreductase	0.0	77 / 42
Matrix metalloproteinase 14	MMP14	P50281	CHEMBL3869	Protease	0.0	59 / 0
Cyclin-dependent kinase 4	CDK4	P11802	CHEMBL331	Kinase	0.0	29 / 0
Alkaline phosphatase placental-like	ALPG	P10696	CHEMBL3402	Enzyme	0.0	2 / 0
Fibroblast growth factor receptor 1	FGFR1	P11362	CHEMBL3650	Kinase	0.0	22 / 0
Tubulin beta-1 chain	TUBB1	Q9H4B7	CHEMBL1915	Structural protein	0.0	6 / 0
MAP kinase-activated protein kinase 2	MAPKAPK2	P49137	CHEMBL2208	Kinase	0.0	14 / 0
Casein kinase I gamma 1	CSNK1G1	Q9HCP0	CHEMBL2426	Kinase	0.0	3 / 0
Ribosomal protein S6 kinase alpha 1	RPS6KA1	Q15418	CHEMBL2553	Kinase	0.0	6 / 0
Rho-associated protein kinase 1	ROCK1	Q13464	CHEMBL3231	Kinase	0.0	33 / 0
Heat shock protein HSP 90-alpha	HSP90AA1	P07900	CHEMBL3880	Other cytosolic protein	0.0	23 / 0
MAP kinase ERK2	MAPK1	P28482	CHEMBL4040	Kinase	0.0	52 / 0
Serine/threonine-protein kinase PIM3	PIM3	Q86V86	CHEMBL5407	Kinase	0.0	7 / 0
CDK9/cyclin T1	CDK9 CCNT1	P50750 O60563	CHEMBL2111389	Other cytosolic protein	0.0	14 / 0
Cyclin-dependent kinase 7	CDK7	P50613	CHEMBL3055	Kinase	0.0	8 / 0
Ribosomal protein S6 kinase 1	RPS6KB1	P23443	CHEMBL4501	Kinase	0.0	32 / 0
Matrix metalloproteinase 16	MMP16	P51512	CHEMBL2200	Protease	0.0	19 / 0
Histone deacetylase 3	HDAC3	O15379	CHEMBL1829	Eraser	0.0	87 / 0
Histone deacetylase 6	HDAC6	Q9UBN7	CHEMBL1865	Eraser	0.0	150 / 0
Vascular endothelial growth factor receptor 1	FLT1	P17948	CHEMBL1868	Kinase	0.0	18 / 0
Inosine-5'-monophosphate dehydrogenase 2	IMPDH2	P12268	CHEMBL2002	Oxidoreductase	0.0	52 / 0
Adenosine A2b receptor	ADORA2B	P29275	CHEMBL255	Family A G protein-coupled receptor	0.0	38 / 0
Histone deacetylase 5	HDAC5	Q9UQL6	CHEMBL2563	Eraser	0.0	8 / 0
Metabotropic glutamate receptor 4	GRM4	Q14833	CHEMBL2736	Family C G protein-coupled receptor	0.0	5 / 0
Ephrin type-B receptor 2	EPHB2	P29323	CHEMBL3290	Kinase	0.0	5 / 0
Tyrosine-protein kinase JAK2	JAK2	O60674	CHEMBL2971	Kinase	0.0	32 / 0
