# Supplementary material for: A Network Pharmacology-Based Study on Irritable Bowel Syndrome Prevention and Treatment Utilizing Shenling Baizhu Powder
Source: Biomed Res Int. 2021 Nov 23;2021:4579850. doi: 10.1155/2021/4579850 (PMC8632384; doi:10.1155/2021/4579850)
Supplement: Supplementary Materials — Please find detailed data in the supplementary file, including the original data of SymMap, metabolomics, and molecular docking of Shenling Baizhu powder. “Shenling Baizhu powder SymMap” includes all herbal targets and combined targets. “Shenling Baizhu powder metabolomics” includes two-dimensional structural data analysis. “Molecular docking” involves molecule-target docking and the results. [file 4579850.f1.zip › Data in brief/2. Shenling Baizhu powder Metabolomics/2D structure/45.csv]

Target	Common name	Uniprot ID	ChEMBL ID	Target Class	Probability*	Known actives (3D/2D)
Cyclooxygenase-2 (by homology)	PTGS2	P35354	CHEMBL230	Oxidoreductase	1.0	5 / 33
Nitric oxide synthase, inducible (by homology)	NOS2	P35228	CHEMBL4481	Enzyme	1.0	4 / 3
Tyrosine-protein kinase receptor FLT3	FLT3	P36888	CHEMBL1974	Kinase	0.303816094671	3 / 7
Aldose reductase	AKR1B1	P15121	CHEMBL1900	Enzyme	0.229685699326	22 / 71
Inhibitor of nuclear factor kappa B kinase beta subunit	IKBKB	O14920	CHEMBL1991	Kinase	0.147256737367	6 / 1
Neurotrophic tyrosine kinase receptor type 2	NTRK2	Q16620	CHEMBL4898	Kinase	0.147256737367	1 / 1
P-glycoprotein 1	ABCB1	P08183	CHEMBL4302	Primary active transporter	0.147256737367	20 / 48
Delta opioid receptor	OPRD1	P41143	CHEMBL236	Family A G protein-coupled receptor	0.139061946948	2 / 5
Stem cell growth factor receptor	KIT	P10721	CHEMBL1936	Kinase	0.130791955177	1 / 3
Lysine-specific demethylase 4D-like	KDM4E	B2RXH2	CHEMBL1293226	Eraser	0.106099949133	2 / 2
Xanthine dehydrogenase	XDH	P47989	CHEMBL1929	Oxidoreductase	0.106099949133	7 / 21
Arachidonate 15-lipoxygenase	ALOX15	P16050	CHEMBL2903	Enzyme	0.106099949133	8 / 9
Cyclin-dependent kinase 1	CDK1	P06493	CHEMBL308	Kinase	0.106099949133	7 / 10
Arachidonate 12-lipoxygenase	ALOX12	P18054	CHEMBL3687	Enzyme	0.106099949133	9 / 11
G protein-coupled receptor kinase 6	GRK6	P43250	CHEMBL6144	Kinase	0.106099949133	3 / 4
Mu opioid receptor	OPRM1	P35372	CHEMBL233	Family A G protein-coupled receptor	0.106099949133	2 / 1
Cytochrome P450 19A1	CYP19A1	P11511	CHEMBL1978	Cytochrome P450	0.106099949133	5 / 18
PI3-kinase p110-gamma subunit	PIK3CG	P48736	CHEMBL3267	Enzyme	0.106099949133	8 / 1
Solute carrier family 22 member 12	SLC22A12	Q96S37	CHEMBL6120	Electrochemical transporter	0.106099949133	5 / 1
Estrogen receptor beta	ESR2	Q92731	CHEMBL242	Nuclear receptor	0.106099949133	76 / 23
Cytochrome P450 1A1	CYP1A1	P04798	CHEMBL2231	Cytochrome P450	0.106099949133	0 / 7
Epidermal growth factor receptor erbB1	EGFR	P00533	CHEMBL203	Kinase	0.106099949133	7 / 29
Induced myeloid leukemia cell differentiation protein Mcl-1	MCL1	Q07820	CHEMBL4361	Other cytosolic protein	0.106099949133	9 / 4
ATP-binding cassette sub-family G member 2	ABCG2	Q9UNQ0	CHEMBL5393	Primary active transporter	0.106099949133	3 / 47
Estrogen receptor alpha	ESR1	P03372	CHEMBL206	Nuclear receptor	0.106099949133	60 / 23
Cytochrome P450 1B1	CYP1B1	Q16678	CHEMBL4878	Cytochrome P450	0.106099949133	10 / 46
Carbonic anhydrase IV	CA4	P22748	CHEMBL3729	Lyase	0.106099949133	6 / 11
Serine/threonine-protein kinase PIM1	PIM1	P11309	CHEMBL2147	Kinase	0.0978745343258	8 / 8
Carbonic anhydrase II	CA2	P00918	CHEMBL205	Lyase	0.0978745343258	15 / 14
Carbonic anhydrase I	CA1	P00915	CHEMBL261	Lyase	0.0978745343258	9 / 10
Telomerase reverse transcriptase	TERT	O14746	CHEMBL2916	Enzyme	0.0978745343258	9 / 22
Adenosine A1 receptor (by homology)	ADORA1	P30542	CHEMBL226	Family A G protein-coupled receptor	0.0978745343258	6 / 23
Adenosine A2a receptor (by homology)	ADORA2A	P29274	CHEMBL251	Family A G protein-coupled receptor	0.0978745343258	8 / 11
Estradiol 17-beta-dehydrogenase 2	HSD17B2	P37059	CHEMBL2789	Enzyme	0.0978745343258	8 / 3
Estradiol 17-beta-dehydrogenase 1	HSD17B1	P14061	CHEMBL3181	Enzyme	0.0978745343258	8 / 4
Carbonic anhydrase VII	CA7	P43166	CHEMBL2326	Lyase	0.0978745343258	5 / 17
Carbonic anhydrase XII	CA12	O43570	CHEMBL3242	Lyase	0.0978745343258	13 / 21
Cyclin-dependent kinase 5/CDK5 activator 1	CDK5R1 CDK5	Q15078 Q00535	CHEMBL1907600	Kinase	0.0978745343258	4 / 18
Cyclin-dependent kinase 1/cyclin B	CCNB3 CDK1 CCNB1 CCNB2	Q8WWL7 P06493 P14635 O95067	CHEMBL2094127	Other cytosolic protein	0.0978745343258	3 / 6
Cyclin-dependent kinase 6	CDK6	Q00534	CHEMBL2508	Kinase	0.0978745343258	2 / 4
Carbonic anhydrase IX	CA9	Q16790	CHEMBL3594	Lyase	0.0978745343258	9 / 12
Carbonyl reductase [NADPH] 1	CBR1	P16152	CHEMBL5586	Enzyme	0.0978745343258	4 / 2
Tyrosine-protein kinase LCK	LCK	P06239	CHEMBL258	Kinase	0.0978745343258	6 / 3
Androgen Receptor	AR	P10275	CHEMBL1871	Nuclear receptor	0.0978745343258	0 / 16
Carbonic anhydrase VI	CA6	P23280	CHEMBL3025	Lyase	0.0978745343258	2 / 1
Hepatocyte growth factor receptor	MET	P08581	CHEMBL3717	Kinase	0.0978745343258	5 / 4
Receptor-type tyrosine-protein phosphatase S	PTPRS	Q13332	CHEMBL2396508	Phosphatase	0.0978745343258	2 / 8
Death-associated protein kinase 1	DAPK1	P53355	CHEMBL2558	Kinase	0.0978745343258	0 / 2
DNA-3-methyladenine glycosylase	MPG	P29372	CHEMBL3396943	Enzyme	0.0978745343258	0 / 1
G-protein coupled receptor 35	GPR35	Q9HC97	CHEMBL1293267	Family A G protein-coupled receptor	0.0978745343258	4 / 4
6-phosphofructo-2-kinase/fructose-2,6-bisphosphatase 3	PFKFB3	Q16875	CHEMBL2331053	Enzyme	0.0978745343258	2 / 2
Heat shock protein HSP 90-alpha	HSP90AA1	P07900	CHEMBL3880	Other cytosolic protein	0.0978745343258	28 / 0
Matrix metalloproteinase 9	MMP9	P14780	CHEMBL321	Protease	0.0978745343258	2 / 2
Matrix metalloproteinase 2	MMP2	P08253	CHEMBL333	Protease	0.0978745343258	2 / 2
Matrix metalloproteinase 12	MMP12	P39900	CHEMBL4393	Protease	0.0978745343258	0 / 1
Lymphocyte differentiation antigen CD38	CD38	P28907	CHEMBL4660	Enzyme	0.0978745343258	0 / 2
DNA topoisomerase I (by homology)	TOP1	P11387	CHEMBL1781	Isomerase	0.0978745343258	0 / 1
Arginase-1 (by homology)	ARG1	P05089	CHEMBL1075097	Enzyme	0.0978745343258	0 / 2
Microtubule-associated protein tau	MAPT	P10636	CHEMBL1293224	Unclassified protein	0.0978745343258	0 / 1
DNA topoisomerase II alpha	TOP2A	P11388	CHEMBL1806	Isomerase	0.0978745343258	0 / 1
Insulin receptor	INSR	P06213	CHEMBL1981	Kinase	0.0978745343258	0 / 1
Myosin light chain kinase, smooth muscle	MYLK	Q15746	CHEMBL2428	Kinase	0.0978745343258	0 / 1
Myeloperoxidase	MPO	P05164	CHEMBL2439	Enzyme	0.0978745343258	0 / 1
PI3-kinase p85-alpha subunit	PIK3R1	P27986	CHEMBL2506	Enzyme	0.0978745343258	0 / 1
Liver glycogen phosphorylase	PYGL	P06737	CHEMBL2568	Enzyme	0.0978745343258	0 / 1
Matrix metalloproteinase 13	MMP13	P45452	CHEMBL280	Protease	0.0978745343258	0 / 1
Matrix metalloproteinase 3	MMP3	P08254	CHEMBL283	Protease	0.0978745343258	0 / 1
Carbonic anhydrase III	CA3	P07451	CHEMBL2885	Lyase	0.0978745343258	0 / 3
Carbonic anhydrase XIV	CA14	Q9ULX7	CHEMBL3510	Lyase	0.0978745343258	0 / 3
Carbonic anhydrase XIII (by homology)	CA13	Q8N1Q1	CHEMBL3912	Lyase	0.0978745343258	0 / 8
CaM kinase II beta	CAMK2B	Q13554	CHEMBL4121	Kinase	0.0978745343258	0 / 2
Phospholipase A2 group 1B	PLA2G1B	P04054	CHEMBL4426	Enzyme	0.0978745343258	0 / 1
Carbonic anhydrase VA	CA5A	P35218	CHEMBL4789	Lyase	0.0978745343258	0 / 2
DNA-(apurinic or apyrimidinic site) lyase	APEX1	P27695	CHEMBL5619	Enzyme	0.0978745343258	0 / 1
Aldo-keto reductase family 1 member C2 (by homology)	AKR1C2	P52895	CHEMBL5847	Enzyme	0.0978745343258	0 / 1
Aldo-keto reductase family 1 member C1 (by homology)	AKR1C1	Q04828	CHEMBL5905	Enzyme	0.0978745343258	0 / 1
Aldo-keto-reductase family 1 member C3 (by homology)	AKR1C3	P42330	CHEMBL4681	Enzyme	0.0978745343258	0 / 1
Aldo-keto reductase family 1 member C4 (by homology)	AKR1C4	P17516	CHEMBL4999	Enzyme	0.0978745343258	0 / 1
Aldehyde reductase (by homology)	AKR1A1	P14550	CHEMBL2246	Enzyme	0.0978745343258	0 / 1
Cytochrome P450 1A2	CYP1A2	P05177	CHEMBL3356	Cytochrome P450	0.0978745343258	1 / 8
Interleukin-8 receptor A	CXCR1	P25024	CHEMBL4029	Family A G protein-coupled receptor	0.0978745343258	3 / 1
Adenosine A3 receptor	ADORA3	P0DMS8	CHEMBL256	Family A G protein-coupled receptor	0.0978745343258	2 / 22
Ornithine decarboxylase	ODC1	P11926	CHEMBL1869	Lyase	0.0978745343258	0 / 1
Endoplasmin	HSP90B1	P14625	CHEMBL1075323	Other membrane protein	0.0978745343258	19 / 0
Tyrosine-protein kinase SRC	SRC	P12931	CHEMBL267	Kinase	0.0978745343258	6 / 10
Arachidonate 5-lipoxygenase	ALOX5	P09917	CHEMBL215	Oxidoreductase	0.0978745343258	4 / 46
Phospholipase A2 group IIA	PLA2G2A	P14555	CHEMBL3474	Enzyme	0.0978745343258	0 / 2
Phosphodiesterase 5A	PDE5A	O76074	CHEMBL1827	Phosphodiesterase	0.0978745343258	3 / 6
Glycogen synthase kinase-3 beta	GSK3B	P49841	CHEMBL262	Kinase	0.0978745343258	9 / 6
Tankyrase-1	TNKS	O95271	CHEMBL6164	Enzyme	0.0978745343258	3 / 28
Butyrylcholinesterase	BCHE	P06276	CHEMBL1914	Hydrolase	0.0978745343258	1 / 3
Acetylcholinesterase	ACHE	P22303	CHEMBL220	Hydrolase	0.0978745343258	2 / 30
Beta amyloid A4 protein	APP	P05067	CHEMBL2487	Membrane receptor	0.0978745343258	1 / 13
Multidrug resistance-associated protein 1	ABCC1	P33527	CHEMBL3004	Primary active transporter	0.0978745343258	4 / 11
Tankyrase-2	TNKS2	Q9H2K2	CHEMBL6154	Enzyme	0.0978745343258	3 / 12
Transthyretin	TTR	P02766	CHEMBL3194	Secreted protein	0.0978745343258	3 / 3
Beta-secretase 1	BACE1	P56817	CHEMBL4822	Protease	0.0978745343258	9 / 13
Vasopressin V2 receptor	AVPR2	P30518	CHEMBL1790	Family A G protein-coupled receptor	0.0978745343258	1 / 1
NEDD8-activating enzyme E1 regulatory subunit	NAE1	Q13564	CHEMBL2016431	Unclassified protein	0.0978745343258	0 / 1
NADPH oxidase 4	NOX4	Q9NPH5	CHEMBL1250375	Enzyme	0.0978745343258	4 / 7
