# Supplementary material for: A Network Pharmacology-Based Study on Irritable Bowel Syndrome Prevention and Treatment Utilizing Shenling Baizhu Powder
Source: Biomed Res Int. 2021 Nov 23;2021:4579850. doi: 10.1155/2021/4579850 (PMC8632384; doi:10.1155/2021/4579850)
Supplement: Supplementary Materials — Please find detailed data in the supplementary file, including the original data of SymMap, metabolomics, and molecular docking of Shenling Baizhu powder. “Shenling Baizhu powder SymMap” includes all herbal targets and combined targets. “Shenling Baizhu powder metabolomics” includes two-dimensional structural data analysis. “Molecular docking” involves molecule-target docking and the results. [file 4579850.f1.zip › Data in brief/2. Shenling Baizhu powder Metabolomics/2D structure/46.csv]

Target	Common name	Uniprot ID	ChEMBL ID	Target Class	Probability*	Known actives (3D/2D)
Voltage-gated potassium channel subunit Kv1.5	KCNA5	P22460	CHEMBL4306	Voltage-gated ion channel	0.106099949133	26 / 1
Carbonic anhydrase VII	CA7	P43166	CHEMBL2326	Lyase	0.0978745343258	12 / 20
Carbonic anhydrase XII	CA12	O43570	CHEMBL3242	Lyase	0.0978745343258	36 / 41
Carbonic anhydrase IX	CA9	Q16790	CHEMBL3594	Lyase	0.0978745343258	44 / 56
Beta-secretase 1	BACE1	P56817	CHEMBL4822	Protease	0.0978745343258	180 / 5
Voltage-gated potassium channel subunit Kv1.3	KCNA3	P22001	CHEMBL4633	Voltage-gated ion channel	0.0978745343258	8 / 14
Carbonic anhydrase XIII	CA13	Q8N1Q1	CHEMBL3912	Lyase	0.0978745343258	15 / 20
Histamine H3 receptor	HRH3	Q9Y5N1	CHEMBL264	Family A G protein-coupled receptor	0.0978745343258	12 / 0
Carbonic anhydrase III	CA3	P07451	CHEMBL2885	Lyase	0.0978745343258	3 / 4
Carbonic anhydrase XIV	CA14	Q9ULX7	CHEMBL3510	Lyase	0.0978745343258	7 / 8
Carbonic anhydrase VB	CA5B	Q9Y2D0	CHEMBL3969	Lyase	0.0978745343258	6 / 4
15-hydroxyprostaglandin dehydrogenase [NAD+]	HPGD	P15428	CHEMBL1293255	Enzyme	0.0978745343258	8 / 0
Methionine aminopeptidase 2	METAP2	P50579	CHEMBL3922	Protease	0.0978745343258	9 / 0
Poly [ADP-ribose] polymerase-1	PARP1	P09874	CHEMBL3105	Enzyme	0.0978745343258	34 / 0
Poly [ADP-ribose] polymerase 2	PARP2	Q9UGN5	CHEMBL5366	Enzyme	0.0978745343258	2 / 0
Ribosomal protein S6 kinase 1	RPS6KB1	P23443	CHEMBL4501	Kinase	0.0978745343258	14 / 0
PI3-kinase p110-beta subunit	PIK3CB	P42338	CHEMBL3145	Enzyme	0.0978745343258	181 / 0
PI3-kinase p110-gamma subunit	PIK3CG	P48736	CHEMBL3267	Enzyme	0.0978745343258	132 / 0
PI3-kinase p110-alpha subunit	PIK3CA	P42336	CHEMBL4005	Enzyme	0.0978745343258	337 / 0
Androgen Receptor	AR	P10275	CHEMBL1871	Nuclear receptor	0.0978745343258	130 / 6
Monoamine oxidase B	MAOB	P27338	CHEMBL2039	Oxidoreductase	0.0978745343258	14 / 78
PI3-kinase p110-delta subunit	PIK3CD	O00329	CHEMBL3130	Enzyme	0.0978745343258	191 / 0
Lymphocyte differentiation antigen CD38 (by homology)	CD38	P28907	CHEMBL4660	Enzyme	0.0978745343258	8 / 0
Intercellular adhesion molecule-1	ICAM1	P05362	CHEMBL3070	Adhesion	0.0978745343258	7 / 0
Selectin E	SELE	P16581	CHEMBL3890	Adhesion	0.0978745343258	8 / 0
Monoamine oxidase A	MAOA	P21397	CHEMBL1951	Oxidoreductase	0.0978745343258	12 / 42
Tyrosine-protein kinase JAK1	JAK1	P23458	CHEMBL2835	Kinase	0.0978745343258	124 / 0
Tyrosine-protein kinase JAK2	JAK2	O60674	CHEMBL2971	Kinase	0.0978745343258	146 / 0
Melanin-concentrating hormone receptor 1	MCHR1	Q99705	CHEMBL344	Family A G protein-coupled receptor	0.0978745343258	6 / 0
Carbonic anhydrase VI	CA6	P23280	CHEMBL3025	Lyase	0.0978745343258	9 / 4
Heat shock protein HSP 90-alpha	HSP90AA1	P07900	CHEMBL3880	Other cytosolic protein	0.0978745343258	23 / 0
Endothelin receptor ET-B	EDNRB	P24530	CHEMBL1785	Family A G protein-coupled receptor	0.0978745343258	53 / 0
Endothelin receptor ET-A	EDNRA	P25101	CHEMBL252	Family A G protein-coupled receptor	0.0978745343258	149 / 0
Bromodomain-containing protein 4	BRD4	O60885	CHEMBL1163125	Reader	0.0978745343258	49 / 0
Phosphodiesterase 4B	PDE4B	Q07343	CHEMBL275	Phosphodiesterase	0.0978745343258	24 / 0
Dual specificity protein kinase CLK4	CLK4	Q9HAZ1	CHEMBL4203	Kinase	0.0978745343258	16 / 0
MAP kinase signal-integrating kinase 2	MKNK2	Q9HBH9	CHEMBL4204	Kinase	0.0978745343258	11 / 0
Carbonic anhydrase I	CA1	P00915	CHEMBL261	Lyase	0.0978745343258	60 / 18
Cyclin-dependent kinase 6	CDK6	Q00534	CHEMBL2508	Kinase	0.0978745343258	1 / 0
Glycogen synthase kinase-3 alpha	GSK3A	P49840	CHEMBL2850	Kinase	0.0978745343258	6 / 0
Cyclin-dependent kinase 2	CDK2	P24941	CHEMBL301	Kinase	0.0978745343258	22 / 0
Cyclin-dependent kinase 1	CDK1	P06493	CHEMBL308	Kinase	0.0978745343258	39 / 0
Cyclin-dependent kinase 4	CDK4	P11802	CHEMBL331	Kinase	0.0978745343258	4 / 0
Serine/threonine-protein kinase Chk1	CHEK1	O14757	CHEMBL4630	Kinase	0.0978745343258	31 / 0
Leucine-rich repeat serine/threonine-protein kinase 2	LRRK2	Q5S007	CHEMBL1075104	Kinase	0.0978745343258	108 / 0
Caspase-9	CASP9	P55211	CHEMBL2273	Protease	0.0978745343258	1 / 0
Caspase-3	CASP3	P42574	CHEMBL2334	Protease	0.0978745343258	48 / 0
Myeloperoxidase	MPO	P05164	CHEMBL2439	Enzyme	0.0978745343258	7 / 0
Adenosine A2a receptor	ADORA2A	P29274	CHEMBL251	Family A G protein-coupled receptor	0.0978745343258	135 / 0
Caspase-7	CASP7	P55210	CHEMBL3468	Protease	0.0978745343258	28 / 0
Nitric-oxide synthase, brain	NOS1	P29475	CHEMBL3568	Enzyme	0.0978745343258	3 / 0
Nitric oxide synthase, inducible	NOS2	P35228	CHEMBL4481	Enzyme	0.0978745343258	4 / 0
Inosine-5'-monophosphate dehydrogenase 2	IMPDH2	P12268	CHEMBL2002	Oxidoreductase	0.0978745343258	20 / 0
Dual specificty protein kinase CLK1 (by homology)	CLK1	P49759	CHEMBL4224	Kinase	0.0978745343258	12 / 0
Dual specificity protein kinase CLK3 (by homology)	CLK3	P49761	CHEMBL4226	Kinase	0.0978745343258	10 / 0
Dual-specificity tyrosine-phosphorylation regulated kinase 2	DYRK2	Q92630	CHEMBL4376	Kinase	0.0978745343258	5 / 0
MAP kinase p38 alpha	MAPK14	Q16539	CHEMBL260	Kinase	0.0978745343258	50 / 0
Cytochrome P450 17A1	CYP17A1	P05093	CHEMBL3522	Cytochrome P450	0.0	26 / 0
Aldo-keto-reductase family 1 member C3	AKR1C3	P42330	CHEMBL4681	Enzyme	0.0	23 / 1
Arachidonate 5-lipoxygenase	ALOX5	P09917	CHEMBL215	Oxidoreductase	0.0	58 / 1
Tyrosine-protein kinase JAK3	JAK3	P52333	CHEMBL2148	Kinase	0.0	89 / 0
Tyrosyl-DNA phosphodiesterase 2	TDP2	O95551	CHEMBL2169736	Enzyme	0.0	7 / 0
Mu opioid receptor	OPRM1	P35372	CHEMBL233	Family A G protein-coupled receptor	0.0	33 / 0
Aldo-keto reductase family 1 member C1	AKR1C1	Q04828	CHEMBL5905	Enzyme	0.0	0 / 1
TAK1/TAB1	TAB1 MAP3K7	Q15750 O43318	CHEMBL3038499	Kinase	0.0	6 / 0
Cytochrome P450 1B1	CYP1B1	Q16678	CHEMBL4878	Cytochrome P450	0.0	5 / 0
Serine/threonine-protein kinase PIM1	PIM1	P11309	CHEMBL2147	Kinase	0.0	47 / 0
Adenosine A1 receptor (by homology)	ADORA1	P30542	CHEMBL226	Family A G protein-coupled receptor	0.0	135 / 0
Adenosine A2b receptor	ADORA2B	P29275	CHEMBL255	Family A G protein-coupled receptor	0.0	66 / 0
Serine/threonine-protein kinase mTOR	MTOR	P42345	CHEMBL2842	Kinase	0.0	121 / 0
Sodium channel protein type IX alpha subunit	SCN9A	Q15858	CHEMBL4296	Voltage-gated ion channel	0.0	115 / 0
Serine/threonine-protein kinase PIM2	PIM2	Q9P1W9	CHEMBL4523	Kinase	0.0	22 / 0
Troponin, cardiac muscle	TNNC1 TNNT2 TNNI3	P63316 P45379 P19429	CHEMBL2095202	Unclassified protein	0.0	3 / 0
Casein kinase I delta	CSNK1D	P48730	CHEMBL2828	Kinase	0.0	4 / 0
Sigma opioid receptor	SIGMAR1	Q99720	CHEMBL287	Membrane receptor	0.0	35 / 0
LIM domain kinase 1	LIMK1	P53667	CHEMBL3836	Kinase	0.0	2 / 0
Casein kinase I epsilon	CSNK1E	P49674	CHEMBL4937	Kinase	0.0	3 / 0
C-C chemokine receptor type 9	CCR9	P51686	CHEMBL5815	Family A G protein-coupled receptor	0.0	17 / 0
Dual specificity protein phosphatase 3	DUSP3	P51452	CHEMBL2635	Phosphatase	0.0	5 / 0
Protein-tyrosine phosphatase 1B	PTPN1	P18031	CHEMBL335	Phosphatase	0.0	11 / 0
Phosphodiesterase 8B	PDE8B	O95263	CHEMBL4408	Phosphodiesterase	0.0	43 / 0
Dual specificity phosphatase Cdc25B	CDC25B	P30305	CHEMBL4804	Phosphatase	0.0	8 / 0
DNA-(apurinic or apyrimidinic site) lyase	APEX1	P27695	CHEMBL5619	Enzyme	0.0	0 / 1
Interleukin-1 receptor-associated kinase 4	IRAK4	Q9NWZ3	CHEMBL3778	Kinase	0.0	13 / 0
Bromodomain-containing protein 2	BRD2	P25440	CHEMBL1293289	Reader	0.0	21 / 0
Bromodomain-containing protein 3	BRD3	Q15059	CHEMBL1795186	Reader	0.0	22 / 0
HMG-CoA reductase (by homology)	HMGCR	P04035	CHEMBL402	Oxidoreductase	0.0	95 / 0
CDC7/DBF4 (Cell division cycle 7-related protein kinase/Activator of S phase kinase)	CDC7	O00311	CHEMBL5443	Kinase	0.0	12 / 0
Prostaglandin E synthase	PTGES	O14684	CHEMBL5658	Enzyme	0.0	10 / 0
Macrophage colony stimulating factor receptor	CSF1R	P07333	CHEMBL1844	Kinase	0.0	11 / 0
Kallikrein 7	KLK7	P49862	CHEMBL2443	Protease	0.0	2 / 0
Vascular cell adhesion protein 1	VCAM1	P19320	CHEMBL3735	Adhesion	0.0	4 / 0
Casein kinase II alpha (prime)	CSNK2A2	P19784	CHEMBL4070	Kinase	0.0	4 / 0
Aldo-keto reductase family 1 member C2	AKR1C2	P52895	CHEMBL5847	Enzyme	0.0	1 / 0
Sulfonylurea receptor 2	ABCC9	O60706	CHEMBL1971	Primary active transporter	0.0	34 / 0
Dual specificity protein kinase CLK2	CLK2	P49760	CHEMBL4225	Kinase	0.0	7 / 0
Dual specificity tyrosine-phosphorylation-regulated kinase 1B	DYRK1B	Q9Y463	CHEMBL5543	Kinase	0.0	7 / 0
Cyclin-dependent kinase 5/CDK5 activator 1	CDK5R1 CDK5	Q15078 Q00535	CHEMBL1907600	Kinase	0.0	58 / 0
Estradiol 17-beta-dehydrogenase 2	HSD17B2	P37059	CHEMBL2789	Enzyme	0.0	40 / 0
Carbonic anhydrase II	CA2	P00918	CHEMBL205	Lyase	0.0	88 / 5
