# Supplementary material for: A Network Pharmacology-Based Study on Irritable Bowel Syndrome Prevention and Treatment Utilizing Shenling Baizhu Powder
Source: Biomed Res Int. 2021 Nov 23;2021:4579850. doi: 10.1155/2021/4579850 (PMC8632384; doi:10.1155/2021/4579850)
Supplement: Supplementary Materials — Please find detailed data in the supplementary file, including the original data of SymMap, metabolomics, and molecular docking of Shenling Baizhu powder. “Shenling Baizhu powder SymMap” includes all herbal targets and combined targets. “Shenling Baizhu powder metabolomics” includes two-dimensional structural data analysis. “Molecular docking” involves molecule-target docking and the results. [file 4579850.f1.zip › Data in brief/2. Shenling Baizhu powder Metabolomics/2D structure/47.csv]

Target	Common name	Uniprot ID	ChEMBL ID	Target Class	Probability*	Known actives (3D/2D)
Dopamine D2 receptor (by homology)	DRD2	P14416	CHEMBL217	Family A G protein-coupled receptor	1.0	598 / 420
Dopamine D1 receptor	DRD1	P21728	CHEMBL2056	Family A G protein-coupled receptor	0.66432658084	92 / 149
Neuronal acetylcholine receptor; alpha4/beta2	CHRNA4 CHRNB2	P43681 P17787	CHEMBL1907589	Ligand-gated ion channel	0.648683716178	86 / 7
Serotonin 7 (5-HT7) receptor	HTR7	P34969	CHEMBL3155	Family A G protein-coupled receptor	0.648683716178	127 / 31
Serotonin 6 (5-HT6) receptor	HTR6	P50406	CHEMBL3371	Family A G protein-coupled receptor	0.632738575979	308 / 3
Serotonin 1a (5-HT1a) receptor	HTR1A	P08908	CHEMBL214	Family A G protein-coupled receptor	0.617022037423	357 / 110
Serotonin 2a (5-HT2a) receptor	HTR2A	P28223	CHEMBL224	Family A G protein-coupled receptor	0.617022037423	284 / 54
Serotonin 5a (5-HT5a) receptor	HTR5A	P47898	CHEMBL3426	Family A G protein-coupled receptor	0.538061807395	35 / 5
Serotonin 2b (5-HT2b) receptor	HTR2B	P41595	CHEMBL1833	Family A G protein-coupled receptor	0.498513190462	79 / 21
Serotonin transporter	SLC6A4	P31645	CHEMBL228	Electrochemical transporter	0.490608749353	529 / 127
Protein tyrosine phosphatase receptor type C-associated protein	PTPRCAP	Q14761	CHEMBL4806	Enzyme	0.482634269369	1 / 1
Dopamine transporter (by homology)	SLC6A3	Q01959	CHEMBL238	Electrochemical transporter	0.451181026723	430 / 46
Alpha-1a adrenergic receptor (by homology)	ADRA1A	P35348	CHEMBL229	Family A G protein-coupled receptor	0.443235065413	54 / 11
Dopamine D5 receptor	DRD5	P21918	CHEMBL1850	Family A G protein-coupled receptor	0.419570786478	37 / 11
Dopamine D4 receptor	DRD4	P21917	CHEMBL219	Family A G protein-coupled receptor	0.419570786478	113 / 23
Mu opioid receptor	OPRM1	P35372	CHEMBL233	Family A G protein-coupled receptor	0.38793103454	363 / 44
Dopamine D3 receptor	DRD3	P35462	CHEMBL234	Family A G protein-coupled receptor	0.38793103454	207 / 118
Serotonin 1d (5-HT1d) receptor	HTR1D	P28221	CHEMBL1983	Family A G protein-coupled receptor	0.316875924388	78 / 1
Serotonin 2c (5-HT2c) receptor	HTR2C	P28335	CHEMBL225	Family A G protein-coupled receptor	0.316875924388	145 / 10
Serotonin 1b (5-HT1b) receptor	HTR1B	P28222	CHEMBL1898	Family A G protein-coupled receptor	0.308960779655	117 / 5
Alpha-2a adrenergic receptor	ADRA2A	P08913	CHEMBL1867	Family A G protein-coupled receptor	0.277371341141	13 / 6
Adrenergic receptor alpha-2	ADRA2C	P18825	CHEMBL1916	Family A G protein-coupled receptor	0.277371341141	21 / 5
Histamine H2 receptor	HRH2	P25021	CHEMBL1941	Family A G protein-coupled receptor	0.277371341141	12 / 1
Alpha-2b adrenergic receptor	ADRA2B	P18089	CHEMBL1942	Family A G protein-coupled receptor	0.277371341141	10 / 4
Alpha-1d adrenergic receptor	ADRA1D	P25100	CHEMBL223	Family A G protein-coupled receptor	0.261559713213	33 / 2
Alpha-1b adrenergic receptor	ADRA1B	P35368	CHEMBL232	Family A G protein-coupled receptor	0.20626523333	43 / 5
HERG	KCNH2	Q12809	CHEMBL240	Voltage-gated ion channel	0.158886033955	71 / 6
Beta-1 adrenergic receptor	ADRB1	P08588	CHEMBL213	Family A G protein-coupled receptor	0.143102156498	10 / 6
Tyrosine 3-hydroxylase	TH	P07101	CHEMBL1969	Oxidoreductase	0.127302569502	0 / 2
Sigma opioid receptor	SIGMAR1	Q99720	CHEMBL287	Membrane receptor	0.11150186548	312 / 48
P-glycoprotein 1	ABCB1	P08183	CHEMBL4302	Primary active transporter	0.11150186548	12 / 68
Translocator protein	TSPO	P30536	CHEMBL5742	Membrane receptor	0.11150186548	3 / 1
Neuronal acetylcholine receptor; alpha3/alpha6/beta2/beta3	CHRNB3 CHRNA6 CHRNB2 CHRNA3	Q05901 Q15825 P17787 P32297	CHEMBL2109233	Ligand-gated ion channel	0.11150186548	3 / 0
Rho-associated protein kinase 1	ROCK1	Q13464	CHEMBL3231	Kinase	0.11150186548	13 / 0
Histamine H4 receptor	HRH4	Q9H3N8	CHEMBL3759	Family A G protein-coupled receptor	0.11150186548	26 / 0
Rho-associated protein kinase 2	ROCK2	O75116	CHEMBL2973	Kinase	0.11150186548	35 / 0
Interleukin-1 receptor-associated kinase 4	IRAK4	Q9NWZ3	CHEMBL3778	Kinase	0.11150186548	6 / 0
Serotonin 1f (5-HT1f) receptor	HTR1F	P30939	CHEMBL1805	Family A G protein-coupled receptor	0.11150186548	24 / 0
Serotonin 1e (5-HT1e) receptor	HTR1E	P28566	CHEMBL2182	Family A G protein-coupled receptor	0.11150186548	10 / 0
Muscarinic acetylcholine receptor M1 (by homology)	CHRM1	P11229	CHEMBL216	Family A G protein-coupled receptor	0.11150186548	133 / 0
Muscarinic acetylcholine receptor M2	CHRM2	P08172	CHEMBL211	Family A G protein-coupled receptor	0.11150186548	71 / 0
Muscarinic acetylcholine receptor M3	CHRM3	P20309	CHEMBL245	Family A G protein-coupled receptor	0.11150186548	57 / 0
Neuronal acetylcholine receptor protein alpha-7 subunit	CHRNA7	P36544	CHEMBL2492	Ligand-gated ion channel	0.11150186548	38 / 0
PH domain leucine-rich repeat-containing protein phosphatase 2	PHLPP2	Q6ZVD8	CHEMBL1275209	Enzyme	0.11150186548	1 / 0
Adenosine A3 receptor	ADORA3	P0DMS8	CHEMBL256	Family A G protein-coupled receptor	0.11150186548	2 / 0
Cytochrome P450 2D6	CYP2D6	P10635	CHEMBL289	Cytochrome P450	0.11150186548	4 / 0
Epidermal growth factor receptor erbB1	EGFR	P00533	CHEMBL203	Kinase	0.11150186548	17 / 0
Muscarinic acetylcholine receptor M4	CHRM4	P08173	CHEMBL1821	Family A G protein-coupled receptor	0.11150186548	37 / 3
Monoamine oxidase A	MAOA	P21397	CHEMBL1951	Oxidoreductase	0.11150186548	33 / 10
Thyroid hormone receptor alpha	THRA	P10827	CHEMBL1860	Nuclear receptor	0.11150186548	1 / 0
Serotonin 3a (5-HT3a) receptor	HTR3A	P46098	CHEMBL1899	Ligand-gated ion channel	0.11150186548	34 / 0
Thyroid hormone receptor beta-1	THRB	P10828	CHEMBL1947	Nuclear receptor	0.11150186548	1 / 0
Coagulation factor VII/tissue factor	F3	P13726	CHEMBL4081	Surface antigen	0.11150186548	0 / 21
Neuronal acetylcholine receptor; alpha3/beta4	CHRNA3 CHRNB4	P32297 P30926	CHEMBL1907594	Ligand-gated ion channel	0.11150186548	64 / 2
Tyrosine-protein kinase receptor FLT3	FLT3	P36888	CHEMBL1974	Kinase	0.11150186548	9 / 0
Cyclin-dependent kinase 2/cyclin A	CDK2 CCNA1 CCNA2	P24941 P78396 P20248	CHEMBL2094128	Other cytosolic protein	0.11150186548	11 / 0
Tyrosine-protein kinase JAK2	JAK2	O60674	CHEMBL2971	Kinase	0.11150186548	10 / 0
Sodium channel protein type IV alpha subunit	SCN4A	P35499	CHEMBL2072	Voltage-gated ion channel	0.11150186548	12 / 0
Cytochrome P450 1A2	CYP1A2	P05177	CHEMBL3356	Cytochrome P450	0.11150186548	1 / 0
Serine/threonine-protein kinase PIM1	PIM1	P11309	CHEMBL2147	Kinase	0.11150186548	31 / 0
Serine/threonine-protein kinase PIM2	PIM2	Q9P1W9	CHEMBL4523	Kinase	0.11150186548	28 / 0
Arachidonate 15-lipoxygenase	ALOX15	P16050	CHEMBL2903	Enzyme	0.11150186548	0 / 1
Arachidonate 12-lipoxygenase	ALOX12	P18054	CHEMBL3687	Enzyme	0.11150186548	0 / 1
Cyclin-dependent kinase 9	CDK9	P50750	CHEMBL3116	Kinase	0.11150186548	31 / 0
Protein kinase C theta	PRKCQ	Q04759	CHEMBL3920	Kinase	0.11150186548	10 / 0
Leukotriene A4 hydrolase	LTA4H	P09960	CHEMBL4618	Protease	0.11150186548	30 / 0
Delta opioid receptor	OPRD1	P41143	CHEMBL236	Family A G protein-coupled receptor	0.11150186548	256 / 33
Kappa Opioid receptor	OPRK1	P41145	CHEMBL237	Family A G protein-coupled receptor	0.11150186548	254 / 30
Nuclear receptor subfamily 4 group A member 1	NR4A1	P22736	CHEMBL1293229	Nuclear receptor	0.11150186548	1 / 0
Inhibitor of apoptosis protein 3	XIAP	P98170	CHEMBL4198	Other cytosolic protein	0.11150186548	39 / 0
Baculoviral IAP repeat-containing protein 2	BIRC2	Q13490	CHEMBL5462	Enzyme	0.11150186548	17 / 0
Squalene synthetase (by homology)	FDFT1	P37268	CHEMBL3338	Enzyme	0.11150186548	3 / 0
Acetylcholine receptor; alpha1/beta1/delta/gamma	CHRNB1 CHRNA1 CHRNG CHRND	P11230 P02708 P07510 Q07001	CHEMBL1907588	Ligand-gated ion channel	0.11150186548	7 / 0
Somatostatin receptor 4	SSTR4	P31391	CHEMBL1853	Family A G protein-coupled receptor	0.11150186548	1 / 0
Somatostatin receptor 1	SSTR1	P30872	CHEMBL1917	Family A G protein-coupled receptor	0.11150186548	1 / 0
Nitric oxide synthase, inducible	NOS2	P35228	CHEMBL4481	Enzyme	0.11150186548	18 / 0
Thromboxane A2 receptor	TBXA2R	P21731	CHEMBL2069	Family A G protein-coupled receptor	0.11150186548	0 / 10
Dipeptidyl peptidase IV	DPP4	P27487	CHEMBL284	Protease	0.11150186548	170 / 53
Hepatocyte growth factor receptor	MET	P08581	CHEMBL3717	Kinase	0.11150186548	8 / 0
Serine/threonine-protein kinase haspin	HASPIN	Q8TF76	CHEMBL1075163	Kinase	0.11150186548	14 / 0
Cyclooxygenase-2	PTGS2	P35354	CHEMBL230	Oxidoreductase	0.11150186548	2 / 0
Hematopoietic prostaglandin D synthase	HPGDS	O60760	CHEMBL5879	Transferase	0.11150186548	1 / 0
Leucine-rich repeat serine/threonine-protein kinase 2	LRRK2	Q5S007	CHEMBL1075104	Kinase	0.0	1 / 0
Dipeptidyl peptidase IX	DPP9	Q86TI2	CHEMBL4793	Protease	0.0	20 / 0
Telomerase reverse transcriptase	TERT	O14746	CHEMBL2916	Enzyme	0.0	5 / 0
Norepinephrine transporter	SLC6A2	P23975	CHEMBL222	Electrochemical transporter	0.0	431 / 18
DNA-(apurinic or apyrimidinic site) lyase	APEX1	P27695	CHEMBL5619	Enzyme	0.0	1 / 0
Tyrosine-protein kinase receptor UFO	AXL	P30530	CHEMBL4895	Kinase	0.0	3 / 0
Tyrosine-protein kinase receptor TYRO3	TYRO3	Q06418	CHEMBL5314	Kinase	0.0	3 / 0
Proto-oncogene tyrosine-protein kinase MER	MERTK	Q12866	CHEMBL5331	Kinase	0.0	4 / 0
Fibroblast activation protein alpha	FAP	Q12884	CHEMBL4683	Protease	0.0	7 / 0
Protein arginine N-methyltransferase 6	PRMT6	Q96LA8	CHEMBL1275221	Writer	0.0	9 / 0
c-Jun N-terminal kinase 1	MAPK8	P45983	CHEMBL2276	Kinase	0.0	2 / 0
Protein arginine N-methyltransferase 8	PRMT8	Q9NR22	CHEMBL3108648	Writer	0.0	8 / 0
Protein-arginine N-methyltransferase 1	PRMT1	Q99873	CHEMBL5524	Writer	0.0	7 / 0
Neuronal acetylcholine receptor protein alpha-4 subunit	CHRNA4	P43681	CHEMBL1882	Ligand-gated ion channel	0.0	13 / 0
Melatonin receptor 1B	MTNR1B	P49286	CHEMBL1946	Family A G protein-coupled receptor	0.0	10 / 37
Amine oxidase, copper containing	AOC3	Q16853	CHEMBL3437	Enzyme	0.0	5 / 0
Tyrosine-protein kinase JAK1	JAK1	P23458	CHEMBL2835	Kinase	0.0	3 / 0
Indoleamine 2,3-dioxygenase	IDO1	P14902	CHEMBL4685	Enzyme	0.0	2 / 0
