# Supplementary material for: A Network Pharmacology-Based Study on Irritable Bowel Syndrome Prevention and Treatment Utilizing Shenling Baizhu Powder
Source: Biomed Res Int. 2021 Nov 23;2021:4579850. doi: 10.1155/2021/4579850 (PMC8632384; doi:10.1155/2021/4579850)
Supplement: Supplementary Materials — Please find detailed data in the supplementary file, including the original data of SymMap, metabolomics, and molecular docking of Shenling Baizhu powder. “Shenling Baizhu powder SymMap” includes all herbal targets and combined targets. “Shenling Baizhu powder metabolomics” includes two-dimensional structural data analysis. “Molecular docking” involves molecule-target docking and the results. [file 4579850.f1.zip › Data in brief/2. Shenling Baizhu powder Metabolomics/2D structure/48.csv]

Target	Common name	Uniprot ID	ChEMBL ID	Target Class	Probability*	Known actives (3D/2D)
G-protein coupled receptor 35	GPR35	Q9HC97	CHEMBL1293267	Family A G protein-coupled receptor	1.0	1 / 2
Receptor protein-tyrosine kinase erbB-2	ERBB2	P04626	CHEMBL1824	Kinase	1.0	1 / 1
Aldose reductase	AKR1B1	P15121	CHEMBL1900	Enzyme	1.0	2 / 8
Cyclin-dependent kinase 4/cyclin D1	CCND1 CDK4	P24385 P11802	CHEMBL1907601	Kinase	1.0	1 / 1
Platelet-derived growth factor receptor beta	PDGFRB	P09619	CHEMBL1913	Kinase	1.0	1 / 1
Vascular endothelial growth factor receptor 3	FLT4	P35916	CHEMBL1955	Kinase	1.0	1 / 1
Insulin-like growth factor I receptor	IGF1R	P08069	CHEMBL1957	Kinase	1.0	1 / 2
Insulin receptor	INSR	P06213	CHEMBL1981	Kinase	1.0	1 / 1
Epidermal growth factor receptor erbB1	EGFR	P00533	CHEMBL203	Kinase	1.0	1 / 2
Carbonic anhydrase II	CA2	P00918	CHEMBL205	Lyase	1.0	1 / 6
Cyclin-dependent kinase 2/cyclin A	CDK2 CCNA1 CCNA2	P24941 P78396 P20248	CHEMBL2094128	Other cytosolic protein	1.0	1 / 1
Serine/threonine-protein kinase Aurora-B	AURKB	Q96GD4	CHEMBL2185	Kinase	1.0	1 / 3
Carbonic anhydrase VII	CA7	P43166	CHEMBL2326	Lyase	1.0	1 / 17
Carbonic anhydrase I	CA1	P00915	CHEMBL261	Lyase	1.0	1 / 15
Glycogen synthase kinase-3 beta	GSK3B	P49841	CHEMBL262	Kinase	1.0	1 / 1
Tyrosine-protein kinase SRC	SRC	P12931	CHEMBL267	Kinase	1.0	1 / 1
Focal adhesion kinase 1	PTK2	Q05397	CHEMBL2695	Kinase	1.0	1 / 1
Vascular endothelial growth factor receptor 2	KDR	P35968	CHEMBL279	Kinase	1.0	1 / 2
Serine/threonine-protein kinase PLK1	PLK1	P53350	CHEMBL3024	Kinase	1.0	1 / 2
Carbonic anhydrase VI	CA6	P23280	CHEMBL3025	Lyase	1.0	1 / 8
Carbonic anhydrase XII	CA12	O43570	CHEMBL3242	Lyase	1.0	1 / 35
Carbonic anhydrase XIV	CA14	Q9ULX7	CHEMBL3510	Lyase	1.0	1 / 14
Carbonic anhydrase IX	CA9	Q16790	CHEMBL3594	Lyase	1.0	1 / 43
Casein kinase II alpha	CSNK2A1	P68400	CHEMBL3629	Kinase	1.0	1 / 1
Hepatocyte growth factor receptor	MET	P08581	CHEMBL3717	Kinase	1.0	1 / 2
Carbonic anhydrase IV	CA4	P22748	CHEMBL3729	Lyase	1.0	1 / 7
Serine/threonine-protein kinase PLK4	PLK4	O00444	CHEMBL3788	Kinase	1.0	1 / 1
Carbonic anhydrase XIII	CA13	Q8N1Q1	CHEMBL3912	Lyase	1.0	1 / 21
Tyrosine-protein kinase TIE-2	TEK	Q02763	CHEMBL4128	Kinase	1.0	1 / 1
Serine/threonine-protein kinase AKT	AKT1	P31749	CHEMBL4282	Kinase	1.0	1 / 1
Serine/threonine-protein kinase Aurora-A	AURKA	O14965	CHEMBL4722	Kinase	1.0	1 / 1
Carbonic anhydrase VA	CA5A	P35218	CHEMBL4789	Lyase	1.0	1 / 9
Beta-secretase 1	BACE1	P56817	CHEMBL4822	Protease	1.0	1 / 5
Mitogen-activated protein kinase kinase kinase 8	MAP3K8	P41279	CHEMBL4899	Kinase	1.0	1 / 1
Serine/threonine-protein kinase B-raf	BRAF	P15056	CHEMBL5145	Kinase	1.0	1 / 1
Ephrin receptor	EPHB4	P54760	CHEMBL5147	Kinase	1.0	1 / 1
Heat shock 70 kDa protein 1	HSPA1A	P0DMV8	CHEMBL5460	Other cytosolic protein	1.0	1 / 1
NUAK family SNF1-like kinase 1	NUAK1	O60285	CHEMBL5784	Kinase	1.0	1 / 1
Squalene monooxygenase (by homology)	SQLE	Q14534	CHEMBL3592	Enzyme	1.0	1 / 1
Tyrosine-protein kinase FGR (by homology)	FGR	P09769	CHEMBL4454	Kinase	1.0	1 / 1
Tyrosine-protein kinase Lyn (by homology)	LYN	P07948	CHEMBL3905	Kinase	1.0	1 / 1
Glutathione reductase	GSR	P00390	CHEMBL2755	Oxidoreductase	0.174646371539	1 / 1
Troponin, cardiac muscle	TNNC1 TNNT2 TNNI3	P63316 P45379 P19429	CHEMBL2095202	Unclassified protein	0.119403562123	0 / 1
Xanthine dehydrogenase	XDH	P47989	CHEMBL1929	Oxidoreductase	0.119403562123	0 / 3
D-amino-acid oxidase	DAO	P14920	CHEMBL5485	Enzyme	0.11150186548	0 / 1
Cyclooxygenase-2	PTGS2	P35354	CHEMBL230	Oxidoreductase	0.11150186548	0 / 3
Estrogen receptor alpha	ESR1	P03372	CHEMBL206	Nuclear receptor	0.11150186548	0 / 43
Estrogen receptor beta	ESR2	Q92731	CHEMBL242	Nuclear receptor	0.11150186548	0 / 61
Monoamine oxidase A	MAOA	P21397	CHEMBL1951	Oxidoreductase	0.11150186548	0 / 34
Estradiol 17-beta-dehydrogenase 3	HSD17B3	P37058	CHEMBL4234	Enzyme	0.11150186548	0 / 19
Protein-tyrosine phosphatase 1B	PTPN1	P18031	CHEMBL335	Phosphatase	0.11150186548	2 / 0
Arachidonate 5-lipoxygenase	ALOX5	P09917	CHEMBL215	Oxidoreductase	0.11150186548	0 / 1
Carbonyl reductase [NADPH] 1	CBR1	P16152	CHEMBL5586	Enzyme	0.11150186548	0 / 1
Carboxylesterase 2	CES2	O00748	CHEMBL3180	Enzyme	0.11150186548	1 / 0
Cyclin-dependent kinase 5/CDK5 activator 1	CDK5R1 CDK5	Q15078 Q00535	CHEMBL1907600	Kinase	0.11150186548	0 / 6
Carbonic anhydrase VB	CA5B	Q9Y2D0	CHEMBL3969	Lyase	0.11150186548	0 / 9
Alpha-synuclein	SNCA	P37840	CHEMBL6152	Unclassified protein	0.11150186548	1 / 0
Acetylcholinesterase	ACHE	P22303	CHEMBL220	Hydrolase	0.0	0 / 12
Cytochrome P450 1A2	CYP1A2	P05177	CHEMBL3356	Cytochrome P450	0.0	0 / 3
Aldehyde dehydrogenase	ALDH2	P05091	CHEMBL1935	Oxidoreductase	0.0	0 / 1
G protein-coupled receptor kinase 6	GRK6	P43250	CHEMBL6144	Kinase	0.0	0 / 1
Steroid 5-alpha-reductase 1	SRD5A1	P18405	CHEMBL1787	Oxidoreductase	0.0	0 / 3
Carbonic anhydrase III	CA3	P07451	CHEMBL2885	Lyase	0.0	0 / 7
Voltage-gated potassium channel subunit Kv1.3	KCNA3	P22001	CHEMBL4633	Voltage-gated ion channel	0.0	0 / 7
Monoamine oxidase B	MAOB	P27338	CHEMBL2039	Oxidoreductase	0.0	0 / 38
Aldo-keto-reductase family 1 member C3	AKR1C3	P42330	CHEMBL4681	Enzyme	0.0	0 / 1
Aldo-keto reductase family 1 member C1	AKR1C1	Q04828	CHEMBL5905	Enzyme	0.0	0 / 1
Steryl-sulfatase	STS	P08842	CHEMBL3559	Enzyme	0.0	0 / 4
Serine/threonine-protein kinase PIM1	PIM1	P11309	CHEMBL2147	Kinase	0.0	0 / 2
ALK tyrosine kinase receptor	ALK	Q9UM73	CHEMBL4247	Kinase	0.0	0 / 1
Tyrosine-protein kinase receptor UFO	AXL	P30530	CHEMBL4895	Kinase	0.0	0 / 1
Macrophage migration inhibitory factor	MIF	P14174	CHEMBL2085	Enzyme	0.0	0 / 5
Serine/threonine-protein kinase/endoribonuclease IRE1	ERN1	O75460	CHEMBL1163101	Enzyme	0.0	0 / 1
Cannabinoid receptor 1	CNR1	P21554	CHEMBL218	Family A G protein-coupled receptor	0.0	0 / 10
Cannabinoid receptor 2	CNR2	P34972	CHEMBL253	Family A G protein-coupled receptor	0.0	0 / 9
Nuclear factor NF-kappa-B p105 subunit	NFKB1	P19838	CHEMBL3251	Other cytosolic protein	0.0	0 / 2
Voltage-gated potassium channel subunit Kv1.5	KCNA5	P22460	CHEMBL4306	Voltage-gated ion channel	0.0	0 / 1
DNA-(apurinic or apyrimidinic site) lyase	APEX1	P27695	CHEMBL5619	Enzyme	0.0	0 / 1
Tyrosine-protein kinase FYN	FYN	P06241	CHEMBL1841	Kinase	0.0	0 / 1
Tyrosine-protein kinase LCK	LCK	P06239	CHEMBL258	Kinase	0.0	0 / 2
Serum paraoxonase/arylesterase 1	PON1	P27169	CHEMBL3167	Enzyme	0.0	0 / 1
Dual-specificity tyrosine-phosphorylation regulated kinase 1A (by homology)	DYRK1A	Q13627	CHEMBL2292	Kinase	0.0	0 / 10
Butyrylcholinesterase	BCHE	P06276	CHEMBL1914	Hydrolase	0.0	0 / 3
Receptor-type tyrosine-protein phosphatase alpha	PTPRA	P18433	CHEMBL3918	Phosphatase	0.0	1 / 0
Androgen Receptor	AR	P10275	CHEMBL1871	Nuclear receptor	0.0	0 / 5
Arachidonate 15-lipoxygenase	ALOX15	P16050	CHEMBL2903	Enzyme	0.0	0 / 5
6-phosphofructo-2-kinase/fructose-2,6-bisphosphatase 3	PFKFB3	Q16875	CHEMBL2331053	Enzyme	0.0	0 / 2
Quinone reductase 1	NQO1	P15559	CHEMBL3623	Enzyme	0.0	0 / 13
Testis-specific androgen-binding protein	SHBG	P04278	CHEMBL3305	Secreted protein	0.0	0 / 1
Kappa Opioid receptor	OPRK1	P41145	CHEMBL237	Family A G protein-coupled receptor	0.0	0 / 1
Cytochrome P450 19A1	CYP19A1	P11511	CHEMBL1978	Cytochrome P450	0.0	0 / 3
Phosphodiesterase 4D	PDE4D	Q08499	CHEMBL288	Phosphodiesterase	0.0	0 / 1
Inhibitor of nuclear factor kappa B kinase beta subunit	IKBKB	O14920	CHEMBL1991	Kinase	0.0	0 / 1
Neurotrophic tyrosine kinase receptor type 2	NTRK2	Q16620	CHEMBL4898	Kinase	0.0	0 / 1
Transthyretin	TTR	P02766	CHEMBL3194	Secreted protein	0.0	0 / 1
Cytochrome P450 1B1	CYP1B1	Q16678	CHEMBL4878	Cytochrome P450	0.0	0 / 1
Dopamine transporter	SLC6A3	Q01959	CHEMBL238	Electrochemical transporter	0.0	0 / 2
Monocarboxylate transporter 4	SLC16A3	O15427	CHEMBL2073663	Electrochemical transporter	0.0	0 / 1
NAD-dependent deacetylase sirtuin 1	SIRT1	Q96EB6	CHEMBL4506	Eraser	0.0	0 / 1
Telomerase reverse transcriptase	TERT	O14746	CHEMBL2916	Enzyme	0.0	0 / 1
