# Supplementary material for: A Network Pharmacology-Based Study on Irritable Bowel Syndrome Prevention and Treatment Utilizing Shenling Baizhu Powder
Source: Biomed Res Int. 2021 Nov 23;2021:4579850. doi: 10.1155/2021/4579850 (PMC8632384; doi:10.1155/2021/4579850)
Supplement: Supplementary Materials — Please find detailed data in the supplementary file, including the original data of SymMap, metabolomics, and molecular docking of Shenling Baizhu powder. “Shenling Baizhu powder SymMap” includes all herbal targets and combined targets. “Shenling Baizhu powder metabolomics” includes two-dimensional structural data analysis. “Molecular docking” involves molecule-target docking and the results. [file 4579850.f1.zip › Data in brief/2. Shenling Baizhu powder Metabolomics/2D structure/49.csv]

Target	Common name	Uniprot ID	ChEMBL ID	Target Class	Probability*	Known actives (3D/2D)
Matrix metalloproteinase 9	MMP9	P14780	CHEMBL321	Protease	0.201601848762	903 / 62
Matrix metalloproteinase 1	MMP1	P03956	CHEMBL332	Protease	0.201601848762	908 / 61
Matrix metalloproteinase 2	MMP2	P08253	CHEMBL333	Protease	0.201601848762	934 / 68
Epidermal growth factor receptor erbB1	EGFR	P00533	CHEMBL203	Kinase	0.126610168686	652 / 61
Cannabinoid receptor 2	CNR2	P34972	CHEMBL253	Family A G protein-coupled receptor	0.101613854776	118 / 11
Serine/threonine-protein kinase B-raf	BRAF	P15056	CHEMBL5145	Kinase	0.101613854776	279 / 0
Cyclin-dependent kinase 1	CDK1	P06493	CHEMBL308	Kinase	0.101613854776	119 / 0
Arachidonate 5-lipoxygenase	ALOX5	P09917	CHEMBL215	Oxidoreductase	0.101613854776	209 / 25
Cyclooxygenase-2	PTGS2	P35354	CHEMBL230	Oxidoreductase	0.101613854776	246 / 61
Monoamine oxidase B	MAOB	P27338	CHEMBL2039	Oxidoreductase	0.101613854776	124 / 37
Testis-specific androgen-binding protein	SHBG	P04278	CHEMBL3305	Secreted protein	0.101613854776	3 / 0
Ephrin type-A receptor 2	EPHA2	P29317	CHEMBL2068	Kinase	0.101613854776	10 / 0
Tyrosine-protein kinase YES	YES1	P07947	CHEMBL2073	Kinase	0.101613854776	21 / 0
Tyrosine-protein kinase BLK	BLK	P51451	CHEMBL2250	Kinase	0.101613854776	11 / 0
Tyrosine-protein kinase SYK	SYK	P43405	CHEMBL2599	Kinase	0.101613854776	353 / 0
Tyrosine-protein kinase CSK	CSK	P41240	CHEMBL2634	Kinase	0.101613854776	8 / 0
Ephrin type-B receptor 2	EPHB2	P29323	CHEMBL3290	Kinase	0.101613854776	7 / 0
Tyrosine-protein kinase BMX	BMX	P51813	CHEMBL3834	Kinase	0.101613854776	8 / 0
Tyrosine-protein kinase Lyn	LYN	P07948	CHEMBL3905	Kinase	0.101613854776	44 / 0
Ephrin type-A receptor 5	EPHA5	P54756	CHEMBL3987	Kinase	0.101613854776	6 / 0
Ephrin type-A receptor 4	EPHA4	P54764	CHEMBL3988	Kinase	0.101613854776	5 / 0
Tyrosine-protein kinase TXK	TXK	P42681	CHEMBL4367	Kinase	0.101613854776	16 / 0
Tyrosine-protein kinase FGR	FGR	P09769	CHEMBL4454	Kinase	0.101613854776	12 / 0
Ephrin type-A receptor 6	EPHA6	Q9UF33	CHEMBL4526	Kinase	0.101613854776	7 / 0
Tyrosine-protein kinase BRK	PTK6	Q13882	CHEMBL4601	Kinase	0.101613854776	26 / 0
Ephrin type-B receptor 3	EPHB3	P54753	CHEMBL4901	Kinase	0.101613854776	3 / 0
Ephrin type-A receptor 3	EPHA3	P29320	CHEMBL4954	Kinase	0.101613854776	11 / 0
Tyrosine-protein kinase BTK	BTK	Q06187	CHEMBL5251	Kinase	0.101613854776	65 / 0
Tyrosine-protein kinase receptor TYRO3	TYRO3	Q06418	CHEMBL5314	Kinase	0.101613854776	18 / 0
Uncharacterized aarF domain-containing protein kinase 4	COQ8B	Q96D53	CHEMBL5753	Kinase	0.101613854776	4 / 0
Ephrin type-A receptor 1	EPHA1	P21709	CHEMBL5810	Kinase	0.101613854776	7 / 0
Cathepsin L	CTSL	P07711	CHEMBL3837	Protease	0.101613854776	89 / 0
Protein-tyrosine phosphatase 1B	PTPN1	P18031	CHEMBL335	Phosphatase	0.101613854776	59 / 16
Rho-associated protein kinase 2	ROCK2	O75116	CHEMBL2973	Kinase	0.101613854776	427 / 0
Dopamine D2 receptor	DRD2	P14416	CHEMBL217	Family A G protein-coupled receptor	0.101613854776	2443 / 99
Dopamine D3 receptor	DRD3	P35462	CHEMBL234	Family A G protein-coupled receptor	0.101613854776	1016 / 82
Serine/threonine-protein kinase mTOR	MTOR	P42345	CHEMBL2842	Kinase	0.101613854776	463 / 0
Tyrosinase	TYR	P14679	CHEMBL1973	Oxidoreductase	0.101613854776	10 / 0
Tyrosine-protein kinase ABL	ABL1	P00519	CHEMBL1862	Kinase	0.101613854776	154 / 0
Dual specificity protein phosphatase 3	DUSP3	P51452	CHEMBL2635	Phosphatase	0.101613854776	9 / 0
Acetylcholinesterase	ACHE	P22303	CHEMBL220	Hydrolase	0.101613854776	327 / 24
Butyrylcholinesterase	BCHE	P06276	CHEMBL1914	Hydrolase	0.101613854776	93 / 23
Protein kinase C (PKC)	PRKCZ	Q05513	CHEMBL3438	Kinase	0.101613854776	19 / 0
Cyclin-dependent kinase 5/CDK5 activator 1	CDK5R1 CDK5	Q15078 Q00535	CHEMBL1907600	Kinase	0.101613854776	134 / 0
Pyruvate dehydrogenase kinase isoform 1	PDK1	Q15118	CHEMBL4766	Kinase	0.101613854776	269 / 0
Serine/threonine-protein kinase Chk2	CHEK2	O96017	CHEMBL2527	Kinase	0.101613854776	49 / 0
Serine/threonine-protein kinase Chk1	CHEK1	O14757	CHEMBL4630	Kinase	0.101613854776	341 / 0
Matrix metalloproteinase 13	MMP13	P45452	CHEMBL280	Protease	0.101613854776	625 / 0
Matrix metalloproteinase 8	MMP8	P22894	CHEMBL4588	Protease	0.101613854776	329 / 0
Estrogen-related receptor alpha	ESRRA	P11474	CHEMBL3429	Nuclear receptor	0.101613854776	18 / 0
Estrogen-related receptor beta	ESRRB	O95718	CHEMBL3751	Nuclear receptor	0.101613854776	18 / 0
Bone morphogenetic protein 1	BMP1	P13497	CHEMBL3898	Protease	0.101613854776	256 / 0
Serine/threonine-protein kinase WEE1	WEE1	P30291	CHEMBL5491	Kinase	0.101613854776	127 / 0
Thymidylate synthase (by homology)	TYMS	P04818	CHEMBL1952	Transferase	0.101613854776	66 / 0
Insulin receptor	INSR	P06213	CHEMBL1981	Kinase	0.101613854776	65 / 0
Ribosomal protein S6 kinase 1	RPS6KB1	P23443	CHEMBL4501	Kinase	0.101613854776	260 / 0
Serotonin 3a (5-HT3a) receptor (by homology)	HTR3A	P46098	CHEMBL1899	Ligand-gated ion channel	0.101613854776	62 / 0
Aldehyde dehydrogenase	ALDH2	P05091	CHEMBL1935	Oxidoreductase	0.101613854776	17 / 0
Matrix metalloproteinase 16	MMP16	P51512	CHEMBL2200	Protease	0.101613854776	28 / 0
Adenosine A1 receptor (by homology)	ADORA1	P30542	CHEMBL226	Family A G protein-coupled receptor	0.101613854776	204 / 0
Adenosine A3 receptor	ADORA3	P0DMS8	CHEMBL256	Family A G protein-coupled receptor	0.101613854776	110 / 0
Matrix metalloproteinase 3	MMP3	P08254	CHEMBL283	Protease	0.101613854776	585 / 0
ADAM17	ADAM17	P78536	CHEMBL3706	Protease	0.101613854776	555 / 0
Matrix metalloproteinase 14	MMP14	P50281	CHEMBL3869	Protease	0.101613854776	142 / 0
Matrix metalloproteinase 12	MMP12	P39900	CHEMBL4393	Protease	0.101613854776	62 / 0
Calpain 1	CAPN1	P07384	CHEMBL3891	Protease	0.101613854776	109 / 13
Dynamin-1	DNM1	Q05193	CHEMBL4958	Enzyme	0.101613854776	13 / 14
Estradiol 17-beta-dehydrogenase 2	HSD17B2	P37059	CHEMBL2789	Enzyme	0.101613854776	187 / 1
Estradiol 17-beta-dehydrogenase 1	HSD17B1	P14061	CHEMBL3181	Enzyme	0.101613854776	212 / 2
TNF-alpha	TNF	P01375	CHEMBL1825	Secreted protein	0.101613854776	136 / 0
Splicing factor 3B subunit 3	SF3B3	Q15393	CHEMBL1250378	Unclassified protein	0.101613854776	1 / 0
Histone deacetylase 3/Nuclear receptor corepressor 2 (HDAC3/NCoR2)	NCOR2 HDAC3	Q9Y618 O15379	CHEMBL2111363	Eraser	0.101613854776	27 / 0
Histone deacetylase 3/NCoR1	NCOR1 HDAC3	O75376 O15379	CHEMBL3038484	Eraser	0.101613854776	14 / 0
Histone deacetylase 11	HDAC11	Q96DB2	CHEMBL3310	Eraser	0.101613854776	51 / 0
Melatonin receptor 1A	MTNR1A	P48039	CHEMBL1945	Family A G protein-coupled receptor	0.101613854776	50 / 120
Melatonin receptor 1B	MTNR1B	P49286	CHEMBL1946	Family A G protein-coupled receptor	0.101613854776	51 / 78
Thyroid hormone receptor alpha	THRA	P10827	CHEMBL1860	Nuclear receptor	0.101613854776	15 / 0
Aminopeptidase N	ANPEP	P15144	CHEMBL1907	Protease	0.101613854776	25 / 0
Thyroid hormone receptor beta-1	THRB	P10828	CHEMBL1947	Nuclear receptor	0.101613854776	12 / 0
Cyclin-dependent kinase 4	CDK4	P11802	CHEMBL331	Kinase	0.101613854776	93 / 0
Histone deacetylase 1	HDAC1	Q13547	CHEMBL325	Eraser	0.101613854776	911 / 28
Serine/threonine-protein kinase/endoribonuclease IRE1	ERN1	O75460	CHEMBL1163101	Enzyme	0.101613854776	93 / 0
Complement factor D	CFD	P00746	CHEMBL2176771	Protease	0.101613854776	249 / 0
Transitional endoplasmic reticulum ATPase	VCP	P55072	CHEMBL1075145	Primary active transporter	0.101613854776	39 / 0
Neuropeptide Y receptor type 1	NPY1R	P25929	CHEMBL4777	Family A G protein-coupled receptor	0.101613854776	68 / 0
Serine/threonine-protein kinase Nek1	NEK1	Q96PY6	CHEMBL5855	Kinase	0.101613854776	40 / 0
Macrophage migration inhibitory factor	MIF	P14174	CHEMBL2085	Enzyme	0.101613854776	35 / 0
Matrix metalloproteinase 7	MMP7	P09237	CHEMBL4073	Protease	0.101613854776	160 / 0
Induced myeloid leukemia cell differentiation protein Mcl-1	MCL1	Q07820	CHEMBL4361	Other cytosolic protein	0.101613854776	28 / 0
Adenosine A2a receptor	ADORA2A	P29274	CHEMBL251	Family A G protein-coupled receptor	0.101613854776	170 / 0
Rho-associated protein kinase 1	ROCK1	Q13464	CHEMBL3231	Kinase	0.101613854776	172 / 0
cAMP-dependent protein kinase alpha-catalytic subunit	PRKACA	P17612	CHEMBL4101	Kinase	0.101613854776	14 / 0
Apoptosis regulator Bcl-X	BCL2L1	Q07817	CHEMBL4625	Other ion channel	0.101613854776	10 / 0
Apoptosis regulator Bcl-2	BCL2	P10415	CHEMBL4860	Other ion channel	0.101613854776	49 / 0
Uridine phosphorylase 1 (by homology)	UPP1	Q16831	CHEMBL4811	Enzyme	0.101613854776	8 / 0
Calcitonin gene-related peptide type 1 receptor	CALCRL	Q16602	CHEMBL3798	Family B G protein-coupled receptor	0.101613854776	189 / 0
Matrix metalloproteinase 15	MMP15	P51511	CHEMBL2963	Protease	0.101613854776	12 / 0
Multidrug resistance-associated protein 1	ABCC1	P33527	CHEMBL3004	Primary active transporter	0.101613854776	53 / 0
Matrix metalloproteinase 26	MMP26	Q9NRE1	CHEMBL4707	Protease	0.101613854776	10 / 0
Sodium/glucose cotransporter 1	SLC5A1	P13866	CHEMBL4979	Electrochemical transporter	0.101613854776	16 / 0
