# Supplementary material for: A Network Pharmacology-Based Study on Irritable Bowel Syndrome Prevention and Treatment Utilizing Shenling Baizhu Powder
Source: Biomed Res Int. 2021 Nov 23;2021:4579850. doi: 10.1155/2021/4579850 (PMC8632384; doi:10.1155/2021/4579850)
Supplement: Supplementary Materials — Please find detailed data in the supplementary file, including the original data of SymMap, metabolomics, and molecular docking of Shenling Baizhu powder. “Shenling Baizhu powder SymMap” includes all herbal targets and combined targets. “Shenling Baizhu powder metabolomics” includes two-dimensional structural data analysis. “Molecular docking” involves molecule-target docking and the results. [file 4579850.f1.zip › Data in brief/2. Shenling Baizhu powder Metabolomics/2D structure/50.csv]

Target	Common name	Uniprot ID	ChEMBL ID	Target Class	Probability*	Known actives (3D/2D)
Dopamine D2 receptor (by homology)	DRD2	P14416	CHEMBL217	Family A G protein-coupled receptor	0.559826896227	813 / 789
Dopamine D1 receptor	DRD1	P21728	CHEMBL2056	Family A G protein-coupled receptor	0.45150322429	153 / 207
Dopamine transporter	SLC6A3	Q01959	CHEMBL238	Electrochemical transporter	0.368191320236	638 / 231
Dopamine D3 receptor	DRD3	P35462	CHEMBL234	Family A G protein-coupled receptor	0.326563704219	273 / 279
Sigma opioid receptor	SIGMAR1	Q99720	CHEMBL287	Membrane receptor	0.326563704219	370 / 366
Dopamine D4 receptor	DRD4	P21917	CHEMBL219	Family A G protein-coupled receptor	0.284878497329	139 / 84
Serotonin 1a (5-HT1a) receptor	HTR1A	P08908	CHEMBL214	Family A G protein-coupled receptor	0.268235116792	363 / 240
Dopamine D5 receptor	DRD5	P21918	CHEMBL1850	Family A G protein-coupled receptor	0.268235116792	51 / 41
Alpha-1a adrenergic receptor	ADRA1A	P35348	CHEMBL229	Family A G protein-coupled receptor	0.209877021734	54 / 25
Adrenergic receptor beta	ADRB2	P07550	CHEMBL210	Family A G protein-coupled receptor	0.201601848762	11 / 59
Beta-1 adrenergic receptor	ADRB1	P08588	CHEMBL213	Family A G protein-coupled receptor	0.201601848762	19 / 28
Alpha-1b adrenergic receptor	ADRA1B	P35368	CHEMBL232	Family A G protein-coupled receptor	0.176593624722	40 / 14
Monoamine oxidase A	MAOA	P21397	CHEMBL1951	Oxidoreductase	0.176593624722	42 / 28
Anti-estrogen binding site (AEBS)	DHCR7	Q9UBM7	CHEMBL2169735	Enzyme	0.176593624722	3 / 3
Alpha-1d adrenergic receptor	ADRA1D	P25100	CHEMBL223	Family A G protein-coupled receptor	0.176593624722	35 / 8
Coagulation factor VII/tissue factor	F3	P13726	CHEMBL4081	Surface antigen	0.168264713882	0 / 21
Serotonin 7 (5-HT7) receptor	HTR7	P34969	CHEMBL3155	Family A G protein-coupled receptor	0.151564691457	160 / 61
Muscarinic acetylcholine receptor M4	CHRM4	P08173	CHEMBL1821	Family A G protein-coupled receptor	0.126610168686	49 / 15
Mu opioid receptor	OPRM1	P35372	CHEMBL233	Family A G protein-coupled receptor	0.126610168686	634 / 538
Serotonin transporter	SLC6A4	P31645	CHEMBL228	Electrochemical transporter	0.126610168686	844 / 400
HERG	KCNH2	Q12809	CHEMBL240	Voltage-gated ion channel	0.118277084772	130 / 72
Neuronal acetylcholine receptor; alpha4/beta2	CHRNA4 CHRNB2	P43681 P17787	CHEMBL1907589	Ligand-gated ion channel	0.118277084772	111 / 16
Neuronal acetylcholine receptor; alpha3/beta4	CHRNA3 CHRNB4	P32297 P30926	CHEMBL1907594	Ligand-gated ion channel	0.118277084772	75 / 5
Serotonin 2a (5-HT2a) receptor	HTR2A	P28223	CHEMBL224	Family A G protein-coupled receptor	0.118277084772	409 / 233
Dipeptidyl peptidase IV	DPP4	P27487	CHEMBL284	Protease	0.118277084772	485 / 54
Alpha-2a adrenergic receptor	ADRA2A	P08913	CHEMBL1867	Family A G protein-coupled receptor	0.118277084772	17 / 27
Delta opioid receptor	OPRD1	P41143	CHEMBL236	Family A G protein-coupled receptor	0.118277084772	446 / 485
Kappa Opioid receptor	OPRK1	P41145	CHEMBL237	Family A G protein-coupled receptor	0.118277084772	410 / 328
Adrenergic receptor alpha-2	ADRA2C	P18825	CHEMBL1916	Family A G protein-coupled receptor	0.109945769839	23 / 24
Melatonin receptor 1B	MTNR1B	P49286	CHEMBL1946	Family A G protein-coupled receptor	0.109945769839	9 / 65
Putative hydrolase RBBP9	RBBP9	O75884	CHEMBL1075121	Enzyme	0.109945769839	0 / 1
Small conductance calcium-activated potassium channel protein 1	KCNN1	Q92952	CHEMBL2369	Voltage-gated ion channel	0.101613854776	1 / 1
Small conductance calcium-activated potassium channel protein 3	KCNN3	Q9UGI6	CHEMBL3381	Voltage-gated ion channel	0.101613854776	1 / 1
Small conductance calcium-activated potassium channel protein 2	KCNN2	Q9H2S1	CHEMBL4469	Voltage-gated ion channel	0.101613854776	1 / 1
Thromboxane A2 receptor	TBXA2R	P21731	CHEMBL2069	Family A G protein-coupled receptor	0.101613854776	1 / 10
Beta-3 adrenergic receptor	ADRB3	P13945	CHEMBL246	Family A G protein-coupled receptor	0.101613854776	2 / 43
Orexin receptor 2	HCRTR2	O43614	CHEMBL4792	Family A G protein-coupled receptor	0.101613854776	0 / 46
Norepinephrine transporter	SLC6A2	P23975	CHEMBL222	Electrochemical transporter	0.101613854776	638 / 146
Acetylcholinesterase	ACHE	P22303	CHEMBL220	Hydrolase	0.101613854776	24 / 220
Melatonin receptor 1A	MTNR1A	P48039	CHEMBL1945	Family A G protein-coupled receptor	0.101613854776	7 / 42
Lysine-specific histone demethylase 1	KDM1A	O60341	CHEMBL6136	Eraser	0.101613854776	62 / 46
P-glycoprotein 1	ABCB1	P08183	CHEMBL4302	Primary active transporter	0.101613854776	12 / 97
Synaptic vesicular amine transporter (by homology)	SLC18A2	Q05940	CHEMBL1893	Electrochemical transporter	0.101613854776	19 / 56
Multidrug and toxin extrusion protein 1	SLC47A1	Q96FL8	CHEMBL1743126	Electrochemical transporter	0.101613854776	0 / 1
Serotonin 3a (5-HT3a) receptor	HTR3A	P46098	CHEMBL1899	Ligand-gated ion channel	0.101613854776	57 / 0
Neuronal acetylcholine receptor; alpha2/beta4	CHRNB4 CHRNA2	P30926 Q15822	CHEMBL2109230	Ligand-gated ion channel	0.101613854776	0 / 1
Serotonin 2c (5-HT2c) receptor	HTR2C	P28335	CHEMBL225	Family A G protein-coupled receptor	0.101613854776	263 / 93
Poly [ADP-ribose] polymerase-1	PARP1	P09874	CHEMBL3105	Enzyme	0.101613854776	60 / 16
Acetylcholine receptor; alpha1/beta1/delta/gamma	CHRNB1 CHRNA1 CHRNG CHRND	P11230 P02708 P07510 Q07001	CHEMBL1907588	Ligand-gated ion channel	0.101613854776	8 / 0
Butyrylcholinesterase	BCHE	P06276	CHEMBL1914	Hydrolase	0.101613854776	16 / 31
Serotonin 2b (5-HT2b) receptor	HTR2B	P41595	CHEMBL1833	Family A G protein-coupled receptor	0.101613854776	170 / 91
Serotonin 6 (5-HT6) receptor	HTR6	P50406	CHEMBL3371	Family A G protein-coupled receptor	0.101613854776	423 / 6
Estrogen receptor alpha	ESR1	P03372	CHEMBL206	Nuclear receptor	0.101613854776	38 / 89
Estrogen receptor beta	ESR2	Q92731	CHEMBL242	Nuclear receptor	0.101613854776	32 / 61
Dipeptidyl peptidase VIII	DPP8	Q6V1X1	CHEMBL4657	Protease	0.101613854776	80 / 10
Serotonin 5a (5-HT5a) receptor	HTR5A	P47898	CHEMBL3426	Family A G protein-coupled receptor	0.101613854776	41 / 13
Histamine H3 receptor	HRH3	Q9Y5N1	CHEMBL264	Family A G protein-coupled receptor	0.101613854776	125 / 147
Inhibitor of apoptosis protein 3	XIAP	P98170	CHEMBL4198	Other cytosolic protein	0.101613854776	60 / 0
Nitric-oxide synthase, brain	NOS1	P29475	CHEMBL3568	Enzyme	0.101613854776	32 / 0
Dipeptidyl peptidase II	DPP7	Q9UHL4	CHEMBL3976	Protease	0.101613854776	94 / 1
Histamine H4 receptor	HRH4	Q9H3N8	CHEMBL3759	Family A G protein-coupled receptor	0.101613854776	49 / 0
Monoamine oxidase B	MAOB	P27338	CHEMBL2039	Oxidoreductase	0.101613854776	47 / 25
Dipeptidyl peptidase IX	DPP9	Q86TI2	CHEMBL4793	Protease	0.101613854776	49 / 0
Carbonic anhydrase VII	CA7	P43166	CHEMBL2326	Lyase	0.101613854776	3 / 19
Neuronal acetylcholine receptor protein alpha-7 subunit	CHRNA7	P36544	CHEMBL2492	Ligand-gated ion channel	0.101613854776	78 / 4
Histone deacetylase 1	HDAC1	Q13547	CHEMBL325	Eraser	0.101613854776	41 / 0
Serotonin 1d (5-HT1d) receptor	HTR1D	P28221	CHEMBL1983	Family A G protein-coupled receptor	0.101613854776	103 / 11
Cyclin-dependent kinase 2/cyclin E1	CCNE1 CDK2	P24864 P24941	CHEMBL1907605	Kinase	0.101613854776	5 / 0
Fibroblast activation protein alpha	FAP	Q12884	CHEMBL4683	Protease	0.101613854776	17 / 0
Serotonin 1b (5-HT1b) receptor	HTR1B	P28222	CHEMBL1898	Family A G protein-coupled receptor	0.101613854776	135 / 17
Proto-oncogene c-JUN	JUN	P05412	CHEMBL4977	Transcription factor	0.101613854776	0 / 4
Cytochrome P450 2D6	CYP2D6	P10635	CHEMBL289	Cytochrome P450	0.101613854776	5 / 0
Multidrug resistance-associated protein 1	ABCC1	P33527	CHEMBL3004	Primary active transporter	0.101613854776	2 / 8
Protein kinase C theta	PRKCQ	Q04759	CHEMBL3920	Kinase	0.101613854776	31 / 0
Orexin receptor 1	HCRTR1	O43613	CHEMBL5113	Family A G protein-coupled receptor	0.101613854776	1 / 50
Indoleamine 2,3-dioxygenase	IDO1	P14902	CHEMBL4685	Enzyme	0.101613854776	2 / 0
Protein arginine N-methyltransferase 6	PRMT6	Q96LA8	CHEMBL1275221	Writer	0.101613854776	12 / 0
Serotonin 1f (5-HT1f) receptor	HTR1F	P30939	CHEMBL1805	Family A G protein-coupled receptor	0.101613854776	27 / 0
Serotonin 4 (5-HT4) receptor	HTR4	Q13639	CHEMBL1875	Family A G protein-coupled receptor	0.101613854776	17 / 0
Serotonin 1e (5-HT1e) receptor	HTR1E	P28566	CHEMBL2182	Family A G protein-coupled receptor	0.101613854776	11 / 0
Protein arginine N-methyltransferase 8	PRMT8	Q9NR22	CHEMBL3108648	Writer	0.101613854776	11 / 0
Protein-arginine N-methyltransferase 1	PRMT1	Q99873	CHEMBL5524	Writer	0.101613854776	10 / 0
Alpha-2b adrenergic receptor	ADRA2B	P18089	CHEMBL1942	Family A G protein-coupled receptor	0.101613854776	14 / 22
Serine/threonine-protein kinase AKT	AKT1	P31749	CHEMBL4282	Kinase	0.101613854776	68 / 0
Baculoviral IAP repeat-containing protein 2	BIRC2	Q13490	CHEMBL5462	Enzyme	0.101613854776	34 / 0
Protein tyrosine phosphatase receptor type C-associated protein	PTPRCAP	Q14761	CHEMBL4806	Enzyme	0.101613854776	1 / 1
Cyclin-dependent kinase 9	CDK9	P50750	CHEMBL3116	Kinase	0.101613854776	49 / 0
Cyclooxygenase-2	PTGS2	P35354	CHEMBL230	Oxidoreductase	0.101613854776	3 / 0
Leukotriene A4 hydrolase	LTA4H	P09960	CHEMBL4618	Protease	0.101613854776	40 / 0
Inhibitor of nuclear factor kappa B kinase beta subunit	IKBKB	O14920	CHEMBL1991	Kinase	0.101613854776	25 / 0
Neuronal acetylcholine receptor; alpha3/beta2	CHRNA3 CHRNB2	P32297 P17787	CHEMBL2109234	Ligand-gated ion channel	0.101613854776	3 / 1
Phosphodiesterase 1A	PDE1A	P54750	CHEMBL3421	Phosphodiesterase	0.101613854776	0 / 1
Histamine H2 receptor	HRH2	P25021	CHEMBL1941	Family A G protein-coupled receptor	0.101613854776	15 / 10
PDZ-binding kinase	PBK	Q96KB5	CHEMBL4896	Kinase	0.101613854776	10 / 0
PH domain leucine-rich repeat-containing protein phosphatase 2	PHLPP2	Q6ZVD8	CHEMBL1275209	Enzyme	0.101613854776	1 / 0
Histamine H1 receptor	HRH1	P35367	CHEMBL231	Family A G protein-coupled receptor	0.101613854776	74 / 21
Muscarinic acetylcholine receptor M5	CHRM5	P08912	CHEMBL2035	Family A G protein-coupled receptor	0.101613854776	50 / 14
Serine/threonine-protein kinase haspin	HASPIN	Q8TF76	CHEMBL1075163	Kinase	0.101613854776	16 / 0
Serine/threonine-protein kinase Chk2	CHEK2	O96017	CHEMBL2527	Kinase	0.101613854776	3 / 0
Prolyl endopeptidase	PREP	P48147	CHEMBL3202	Protease	0.101613854776	4 / 0
