# Supplementary material for: A Network Pharmacology-Based Study on Irritable Bowel Syndrome Prevention and Treatment Utilizing Shenling Baizhu Powder
Source: Biomed Res Int. 2021 Nov 23;2021:4579850. doi: 10.1155/2021/4579850 (PMC8632384; doi:10.1155/2021/4579850)
Supplement: Supplementary Materials — Please find detailed data in the supplementary file, including the original data of SymMap, metabolomics, and molecular docking of Shenling Baizhu powder. “Shenling Baizhu powder SymMap” includes all herbal targets and combined targets. “Shenling Baizhu powder metabolomics” includes two-dimensional structural data analysis. “Molecular docking” involves molecule-target docking and the results. [file 4579850.f1.zip › Data in brief/2. Shenling Baizhu powder Metabolomics/2D structure/51.csv]

Target	Common name	Uniprot ID	ChEMBL ID	Target Class	Probability*	Known actives (3D/2D)
Aldose reductase	AKR1B1	P15121	CHEMBL1900	Enzyme	0.285287513408	8 / 2
Squalene monooxygenase (by homology)	SQLE	Q14534	CHEMBL3592	Enzyme	0.127302569502	0 / 12
Thrombin and coagulation factor X	F10	P00742	CHEMBL244	Protease	0.127302569502	0 / 3
AMY1C	AMY1A	P04745	CHEMBL2478	Enzyme	0.127302569502	0 / 1
Plasminogen activator inhibitor-1	SERPINE1	P05121	CHEMBL3475	Secreted protein	0.127302569502	0 / 12
Beta-secretase 1	BACE1	P56817	CHEMBL4822	Protease	0.127302569502	0 / 4
Protein-tyrosine phosphatase 1B	PTPN1	P18031	CHEMBL335	Phosphatase	0.119403562123	20 / 14
T-cell protein-tyrosine phosphatase	PTPN2	P17706	CHEMBL3807	Phosphatase	0.119403562123	3 / 4
Adenosine A2a receptor (by homology)	ADORA2A	P29274	CHEMBL251	Family A G protein-coupled receptor	0.11150186548	69 / 0
Adenosine deaminase	ADA	P00813	CHEMBL1910	Hydrolase	0.11150186548	8 / 0
Purine nucleoside phosphorylase	PNP	P00491	CHEMBL4338	Enzyme	0.11150186548	21 / 0
Adenosine A3 receptor	ADORA3	P0DMS8	CHEMBL256	Family A G protein-coupled receptor	0.11150186548	56 / 0
Carbonic anhydrase XIII	CA13	Q8N1Q1	CHEMBL3912	Lyase	0.11150186548	7 / 0
Carbonic anhydrase VI	CA6	P23280	CHEMBL3025	Lyase	0.11150186548	2 / 0
Carbonic anhydrase IV	CA4	P22748	CHEMBL3729	Lyase	0.11150186548	6 / 0
Carbonic anhydrase VA	CA5A	P35218	CHEMBL4789	Lyase	0.11150186548	5 / 0
Tyrosyl-DNA phosphodiesterase 1	TDP1	Q9NUW8	CHEMBL1075138	Enzyme	0.11150186548	0 / 2
Galectin-3	LGALS3	P17931	CHEMBL4531	Other cytosolic protein	0.11150186548	2 / 3
Galectin-9	LGALS9	O00182	CHEMBL5474	Other cytosolic protein	0.11150186548	1 / 2
Glycogen synthase kinase-3 beta	GSK3B	P49841	CHEMBL262	Kinase	0.11150186548	1 / 0
Transitional endoplasmic reticulum ATPase	VCP	P55072	CHEMBL1075145	Primary active transporter	0.11150186548	0 / 1
Troponin, cardiac muscle	TNNC1 TNNT2 TNNI3	P63316 P45379 P19429	CHEMBL2095202	Unclassified protein	0.11150186548	0 / 1
Adenosine kinase	ADK	P55263	CHEMBL3589	Enzyme	0.11150186548	34 / 0
Thymidine phosphorylase	TYMP	P19971	CHEMBL3106	Enzyme	0.11150186548	6 / 0
Vascular endothelial growth factor A	VEGFA	P15692	CHEMBL1783	Secreted protein	0.11150186548	0 / 1
Acidic fibroblast growth factor	FGF1	P05230	CHEMBL2120	Secreted protein	0.11150186548	0 / 1
Basic fibroblast growth factor	FGF2	P09038	CHEMBL3107	Secreted protein	0.11150186548	0 / 1
Heparanase	HPSE	Q9Y251	CHEMBL3921	Enzyme	0.11150186548	0 / 1
Gamma-glutamyl hydrolase	GGH	Q92820	CHEMBL2223	Protease	0.0	1 / 0
Glutamate carboxypeptidase II	FOLH1	Q04609	CHEMBL1892	Protease	0.0	11 / 0
Maltase-glucoamylase	MGAM	O43451	CHEMBL2074	Hydrolase	0.0	8 / 0
Sucrase-isomaltase	SI	P14410	CHEMBL2748	Enzyme	0.0	6 / 0
Carbonic anhydrase III	CA3	P07451	CHEMBL2885	Lyase	0.0	2 / 0
Cyclin-dependent kinase 4/cyclin D1	CCND1 CDK4	P24385 P11802	CHEMBL1907601	Kinase	0.0	1 / 0
Cyclin-dependent kinase 1/cyclin B1	CDK1 CCNB1	P06493 P14635	CHEMBL1907602	Other cytosolic protein	0.0	2 / 0
Trehalase	TREH	O43280	CHEMBL3087	Enzyme	0.0	1 / 0
Thymidylate kinase	DTYMK	P23919	CHEMBL4388	Transferase	0.0	1 / 0
Cytidine deaminase	CDA	P32320	CHEMBL4502	Enzyme	0.0	27 / 0
Heat shock cognate 71 kDa protein	HSPA8	P11142	CHEMBL1275223	Other cytosolic protein	0.0	3 / 0
78 kDa glucose-regulated protein	HSPA5	P11021	CHEMBL1781865	Unclassified protein	0.0	2 / 0
P2X purinoceptor 3	P2RX3	P56373	CHEMBL2998	Ligand-gated ion channel	0.0	2 / 0
Induced myeloid leukemia cell differentiation protein Mcl-1	MCL1	Q07820	CHEMBL4361	Other cytosolic protein	0.0	2 / 0
Bifunctional protein NCOAT	OGA	O60502	CHEMBL5921	Enzyme	0.0	34 / 0
Glyceraldehyde-3-phosphate dehydrogenase liver	GAPDH	P04406	CHEMBL2284	Oxidoreductase	0.0	2 / 0
Dipeptidyl peptidase IV	DPP4	P27487	CHEMBL284	Protease	0.0	1 / 0
Indoleamine 2,3-dioxygenase	IDO1	P14902	CHEMBL4685	Enzyme	0.0	1 / 0
MAP kinase ERK2	MAPK1	P28482	CHEMBL4040	Kinase	0.0	1 / 0
D-amino-acid oxidase	DAO	P14920	CHEMBL5485	Enzyme	0.0	6 / 0
Serine/threonine-protein kinase PIM1	PIM1	P11309	CHEMBL2147	Kinase	0.0	1 / 0
Hexokinase type II	HK2	P52789	CHEMBL2640	Enzyme	0.0	2 / 0
Hexokinase type I	HK1	P19367	CHEMBL2688	Enzyme	0.0	2 / 0
Alpha-L-fucosidase I	FUCA1	P04066	CHEMBL4176	Enzyme	0.0	4 / 0
Muscle glycogen phosphorylase	PYGM	P11217	CHEMBL3526	Enzyme	0.0	5 / 0
Beta-glucocerebrosidase	GBA	P04062	CHEMBL2179	Enzyme	0.0	4 / 0
Platelet activating factor receptor	PTAFR	P25105	CHEMBL250	Family A G protein-coupled receptor	0.0	0 / 15
Thymidine kinase, cytosolic	TK1	P04183	CHEMBL2883	Transferase	0.0	6 / 0
Rhodopsin kinase	GRK1	Q15835	CHEMBL5607	Kinase	0.0	1 / 0
Adenosylhomocysteinase	AHCY	P23526	CHEMBL2664	Enzyme	0.0	13 / 0
Tumour suppressor p53/oncoprotein Mdm2	TP53	P04637	CHEMBL4096	Transcription factor	0.0	0 / 2
Cyclin-dependent kinase 2/cyclin A	CDK2 CCNA1 CCNA2	P24941 P78396 P20248	CHEMBL2094128	Other cytosolic protein	0.0	3 / 0
Heat shock protein HSP 90-alpha	HSP90AA1	P07900	CHEMBL3880	Other cytosolic protein	0.0	1 / 5
Lysine-specific demethylase 4D-like	KDM4E	B2RXH2	CHEMBL1293226	Eraser	0.0	2 / 0
Thrombin	F2	P00734	CHEMBL204	Protease	0.0	4 / 0
Liver glycogen phosphorylase	PYGL	P06737	CHEMBL2568	Enzyme	0.0	9 / 0
Tyrosine-protein kinase LCK	LCK	P06239	CHEMBL258	Kinase	0.0	1 / 0
Hypoxanthine-guanine phosphoribosyltransferase	HPRT1	P00492	CHEMBL2360	Enzyme	0.0	13 / 0
Butyrylcholinesterase	BCHE	P06276	CHEMBL1914	Hydrolase	0.0	0 / 13
Matrix metalloproteinase 3	MMP3	P08254	CHEMBL283	Protease	0.0	5 / 0
Matrix metalloproteinase 9	MMP9	P14780	CHEMBL321	Protease	0.0	7 / 0
Matrix metalloproteinase 1	MMP1	P03956	CHEMBL332	Protease	0.0	8 / 0
ADAM17	ADAM17	P78536	CHEMBL3706	Protease	0.0	5 / 0
Aldo-keto-reductase family 1 member C3	AKR1C3	P42330	CHEMBL4681	Enzyme	0.0	6 / 0
Protein kinase C gamma	PRKCG	P05129	CHEMBL2938	Kinase	0.0	0 / 9
Protein kinase C delta	PRKCD	Q05655	CHEMBL2996	Kinase	0.0	0 / 18
Protein kinase C alpha	PRKCA	P17252	CHEMBL299	Kinase	0.0	0 / 28
Protein kinase C beta	PRKCB	P05771	CHEMBL3045	Kinase	0.0	0 / 9
Protein kinase C epsilon	PRKCE	Q02156	CHEMBL3582	Kinase	0.0	0 / 9
Protein kinase C eta	PRKCH	P24723	CHEMBL3616	Kinase	0.0	0 / 9
Protein kinase C theta	PRKCQ	Q04759	CHEMBL3920	Kinase	0.0	0 / 8
Somatostatin receptor 5	SSTR5	P35346	CHEMBL1792	Family A G protein-coupled receptor	0.0	0 / 12
Somatostatin receptor 2	SSTR2	P30874	CHEMBL1804	Family A G protein-coupled receptor	0.0	0 / 5
Somatostatin receptor 4	SSTR4	P31391	CHEMBL1853	Family A G protein-coupled receptor	0.0	0 / 5
Somatostatin receptor 1	SSTR1	P30872	CHEMBL1917	Family A G protein-coupled receptor	0.0	0 / 5
Somatostatin receptor 3	SSTR3	P32745	CHEMBL2028	Family A G protein-coupled receptor	0.0	0 / 7
AICAR transformylase	ATIC	P31939	CHEMBL2518	Enzyme	0.0	1 / 0
Arachidonate 12-lipoxygenase	ALOX12	P18054	CHEMBL3687	Enzyme	0.0	1 / 0
Pancreatic alpha-amylase	AMY2A	P04746	CHEMBL2045	Hydrolase	0.0	1 / 0
Lysosomal alpha-glucosidase	GAA	P10253	CHEMBL2608	Hydrolase	0.0	3 / 0
Inosine-5'-monophosphate dehydrogenase 1	IMPDH1	P20839	CHEMBL1822	Oxidoreductase	0.0	18 / 0
NAALADase II	NAALAD2	Q9Y3Q0	CHEMBL2609	Protease	0.0	9 / 0
Matrix metalloproteinase 8	MMP8	P22894	CHEMBL4588	Protease	0.0	4 / 0
Alcohol dehydrogenase alpha chain	ADH1A	P07327	CHEMBL1970	Oxidoreductase	0.0	1 / 0
Adenosine A1 receptor	ADORA1	P30542	CHEMBL226	Family A G protein-coupled receptor	0.0	103 / 1
P-glycoprotein 1	ABCB1	P08183	CHEMBL4302	Primary active transporter	0.0	0 / 63
Transforming protein p21/H-Ras-1	HRAS	P01112	CHEMBL2167	Other cytosolic protein	0.0	1 / 0
6-phosphofructo-2-kinase/fructose-2,6-bisphosphatase 3	PFKFB3	Q16875	CHEMBL2331053	Enzyme	0.0	2 / 0
Adenosine A2b receptor	ADORA2B	P29275	CHEMBL255	Family A G protein-coupled receptor	0.0	6 / 0
Programmed cell death protein 4	PDCD4	Q53EL6	CHEMBL1781868	Unclassified protein	0.0	1 / 0
Low affinity neurotrophin receptor p75NTR	NGFR	P08138	CHEMBL4762	Membrane receptor	0.0	1 / 0
Solute carrier family 28 member 3	SLC28A3	Q9HAS3	CHEMBL5707	Electrochemical transporter	0.0	1 / 0
