# Supplementary material for: A Network Pharmacology-Based Study on Irritable Bowel Syndrome Prevention and Treatment Utilizing Shenling Baizhu Powder
Source: Biomed Res Int. 2021 Nov 23;2021:4579850. doi: 10.1155/2021/4579850 (PMC8632384; doi:10.1155/2021/4579850)
Supplement: Supplementary Materials — Please find detailed data in the supplementary file, including the original data of SymMap, metabolomics, and molecular docking of Shenling Baizhu powder. “Shenling Baizhu powder SymMap” includes all herbal targets and combined targets. “Shenling Baizhu powder metabolomics” includes two-dimensional structural data analysis. “Molecular docking” involves molecule-target docking and the results. [file 4579850.f1.zip › Data in brief/2. Shenling Baizhu powder Metabolomics/2D structure/52.csv]

Target	Common name	Uniprot ID	ChEMBL ID	Target Class	Probability*	Known actives (3D/2D)
Glycogen synthase kinase-3 beta	GSK3B	P49841	CHEMBL262	Kinase	0.104671941128	75 / 0
Aldehyde dehydrogenase	ALDH2	P05091	CHEMBL1935	Oxidoreductase	0.104671941128	12 / 0
Matrix metalloproteinase 1	MMP1	P03956	CHEMBL332	Protease	0.104671941128	180 / 0
Matrix metalloproteinase 2	MMP2	P08253	CHEMBL333	Protease	0.104671941128	221 / 0
Ornithine decarboxylase	ODC1	P11926	CHEMBL1869	Lyase	0.104671941128	7 / 10
Serine/threonine-protein kinase/endoribonuclease IRE1	ERN1	O75460	CHEMBL1163101	Enzyme	0.104671941128	22 / 0
Sterol regulatory element-binding protein 2	SREBF2	Q12772	CHEMBL1795166	Unclassified protein	0.104671941128	3 / 0
Serine/threonine-protein kinase Aurora-A	AURKA	O14965	CHEMBL4722	Kinase	0.104671941128	268 / 0
Tyrosine-protein kinase receptor FLT3	FLT3	P36888	CHEMBL1974	Kinase	0.104671941128	51 / 0
Glucagon receptor	GCGR	P47871	CHEMBL1985	Family B G protein-coupled receptor	0.104671941128	21 / 0
Cyclin-dependent kinase 1/cyclin B	CCNB3 CDK1 CCNB1 CCNB2	Q8WWL7 P06493 P14635 O95067	CHEMBL2094127	Other cytosolic protein	0.104671941128	15 / 0
Toll-like receptor (TLR7/TLR9)	TLR9	Q9NR96	CHEMBL5804	Toll-like and Il-1 receptors	0.104671941128	9 / 0
Serine/threonine-protein kinase Chk1	CHEK1	O14757	CHEMBL4630	Kinase	0.104671941128	85 / 0
Catechol O-methyltransferase	COMT	P21964	CHEMBL2023	Transferase	0.104671941128	2 / 0
Cathepsin L	CTSL	P07711	CHEMBL3837	Protease	0.104671941128	20 / 0
Troponin, cardiac muscle	TNNC1 TNNT2 TNNI3	P63316 P45379 P19429	CHEMBL2095202	Unclassified protein	0.104671941128	5 / 0
Glycogen synthase kinase-3 alpha	GSK3A	P49840	CHEMBL2850	Kinase	0.104671941128	14 / 0
Cyclin-dependent kinase 2	CDK2	P24941	CHEMBL301	Kinase	0.104671941128	50 / 0
Protein-tyrosine phosphatase 1B	PTPN1	P18031	CHEMBL335	Phosphatase	0.104671941128	56 / 14
Histone deacetylase 3	HDAC3	O15379	CHEMBL1829	Eraser	0.104671941128	167 / 0
Histone deacetylase 1	HDAC1	Q13547	CHEMBL325	Eraser	0.104671941128	619 / 0
Matrix metalloproteinase 13	MMP13	P45452	CHEMBL280	Protease	0.104671941128	130 / 0
Matrix metalloproteinase 3	MMP3	P08254	CHEMBL283	Protease	0.104671941128	115 / 0
ADAM17	ADAM17	P78536	CHEMBL3706	Protease	0.104671941128	74 / 0
Matrix metalloproteinase 14	MMP14	P50281	CHEMBL3869	Protease	0.104671941128	25 / 0
Matrix metalloproteinase 7	MMP7	P09237	CHEMBL4073	Protease	0.104671941128	26 / 0
Matrix metalloproteinase 12	MMP12	P39900	CHEMBL4393	Protease	0.104671941128	17 / 0
Matrix metalloproteinase 8	MMP8	P22894	CHEMBL4588	Protease	0.104671941128	62 / 0
Aldose reductase	AKR1B1	P15121	CHEMBL1900	Enzyme	0.104671941128	49 / 8
Histone deacetylase 6	HDAC6	Q9UBN7	CHEMBL1865	Eraser	0.104671941128	446 / 0
Histone deacetylase 8	HDAC8	Q9BY41	CHEMBL3192	Eraser	0.104671941128	313 / 0
Thromboxane A2 receptor	TBXA2R	P21731	CHEMBL2069	Family A G protein-coupled receptor	0.104671941128	11 / 0
Bone morphogenetic protein 4	BMP4	P12644	CHEMBL5350	Protease	0.104671941128	5 / 0
Acyl coenzyme A:cholesterol acyltransferase	CES1	P23141	CHEMBL2265	Enzyme	0.104671941128	14 / 0
Carboxylesterase 2	CES2	O00748	CHEMBL3180	Enzyme	0.104671941128	1 / 0
Dual specificity phosphatase Cdc25A	CDC25A	P30304	CHEMBL3775	Phosphatase	0.104671941128	12 / 0
Dual specificity phosphatase Cdc25B	CDC25B	P30305	CHEMBL4804	Phosphatase	0.104671941128	16 / 0
Macrophage migration inhibitory factor	MIF	P14174	CHEMBL2085	Enzyme	0.104671941128	20 / 0
Serine/threonine-protein kinase Aurora-B	AURKB	Q96GD4	CHEMBL2185	Kinase	0.104671941128	168 / 0
Macrophage-expressed gene 1 protein	MPEG1	Q2M385	CHEMBL3414409	Unclassified protein	0.104671941128	9 / 0
Cytochrome P450 11B1	CYP11B1	P15538	CHEMBL1908	Cytochrome P450	0.104671941128	12 / 0
Cytochrome P450 11B2	CYP11B2	P19099	CHEMBL2722	Cytochrome P450	0.104671941128	12 / 0
Induced myeloid leukemia cell differentiation protein Mcl-1	MCL1	Q07820	CHEMBL4361	Other cytosolic protein	0.104671941128	9 / 0
Vanilloid receptor (by homology)	TRPV1	Q8NER1	CHEMBL4794	Voltage-gated ion channel	0.104671941128	273 / 0
Serine/threonine-protein kinase PLK1	PLK1	P53350	CHEMBL3024	Kinase	0.104671941128	37 / 0
Apoptosis regulator Bcl-2	BCL2	P10415	CHEMBL4860	Other ion channel	0.104671941128	6 / 0
Metabotropic glutamate receptor 2	GRM2	Q14416	CHEMBL5137	Family C G protein-coupled receptor	0.104671941128	9 / 0
G protein-coupled receptor kinase 6	GRK6	P43250	CHEMBL6144	Kinase	0.104671941128	1 / 0
Tyrosine-protein kinase SRC	SRC	P12931	CHEMBL267	Kinase	0.104671941128	71 / 1
Adenosine A1 receptor (by homology)	ADORA1	P30542	CHEMBL226	Family A G protein-coupled receptor	0.104671941128	88 / 0
Epoxide hydratase	EPHX2	P34913	CHEMBL2409	Protease	0.104671941128	75 / 0
Adenosine A2b receptor	ADORA2B	P29275	CHEMBL255	Family A G protein-coupled receptor	0.104671941128	51 / 0
Sphingosine 1-phosphate receptor Edg-3	S1PR3	Q99500	CHEMBL3892	Family A G protein-coupled receptor	0.104671941128	41 / 0
Sphingosine 1-phosphate receptor Edg-1	S1PR1	P21453	CHEMBL4333	Family A G protein-coupled receptor	0.104671941128	46 / 0
MAP kinase ERK2	MAPK1	P28482	CHEMBL4040	Kinase	0.104671941128	134 / 0
Kinesin-like protein 1	KIF11	P52732	CHEMBL4581	Other cytosolic protein	0.104671941128	11 / 0
Hepatocyte growth factor receptor	MET	P08581	CHEMBL3717	Kinase	0.104671941128	113 / 8
Histone deacetylase 5	HDAC5	Q9UQL6	CHEMBL2563	Eraser	0.104671941128	27 / 0
Histone deacetylase 7	HDAC7	Q8WUI4	CHEMBL2716	Eraser	0.104671941128	34 / 0
Histone deacetylase 10	HDAC10	Q969S8	CHEMBL5103	Eraser	0.104671941128	48 / 0
Histone deacetylase 2	HDAC2	Q92769	CHEMBL1937	Eraser	0.104671941128	216 / 0
Inhibitor of nuclear factor kappa B kinase epsilon subunit	IKBKE	Q14164	CHEMBL3529	Kinase	0.104671941128	11 / 0
Serine/threonine-protein kinase TBK1	TBK1	Q9UHD2	CHEMBL5408	Kinase	0.104671941128	11 / 0
Glutamate NMDA receptor; GRIN1/GRIN2B	GRIN1 GRIN2B	Q05586 Q13224	CHEMBL1907603	Ligand-gated ion channel	0.104671941128	19 / 0
6-phosphofructo-2-kinase/fructose-2,6-bisphosphatase 3	PFKFB3	Q16875	CHEMBL2331053	Enzyme	0.104671941128	35 / 0
Cathepsin (B and K)	CTSB	P07858	CHEMBL4072	Protease	0.104671941128	28 / 0
Plectin	PLEC	Q15149	CHEMBL1293240	Unclassified protein	0.104671941128	2 / 0
Estradiol 17-beta-dehydrogenase 3	HSD17B3	P37058	CHEMBL4234	Enzyme	0.104671941128	22 / 0
Serine/threonine-protein kinase Chk2	CHEK2	O96017	CHEMBL2527	Kinase	0.104671941128	36 / 0
11-beta-hydroxysteroid dehydrogenase 1	HSD11B1	P28845	CHEMBL4235	Enzyme	0.104671941128	87 / 0
Hematopoietic prostaglandin D synthase	HPGDS	O60760	CHEMBL5879	Transferase	0.104671941128	9 / 0
Serine/threonine-protein kinase RAF	RAF1	P04049	CHEMBL1906	Kinase	0.104671941128	32 / 0
Insulin-like growth factor I receptor	IGF1R	P08069	CHEMBL1957	Kinase	0.104671941128	27 / 0
Dipeptidyl peptidase IV	DPP4	P27487	CHEMBL284	Protease	0.104671941128	243 / 0
Cytochrome P450 17A1	CYP17A1	P05093	CHEMBL3522	Cytochrome P450	0.104671941128	20 / 0
Serine/threonine-protein kinase 17B	STK17B	O94768	CHEMBL3980	Kinase	0.104671941128	6 / 0
Serine/threonine-protein kinase B-raf	BRAF	P15056	CHEMBL5145	Kinase	0.104671941128	67 / 0
Vascular endothelial growth factor receptor 2	KDR	P35968	CHEMBL279	Kinase	0.104671941128	270 / 1
Transitional endoplasmic reticulum ATPase	VCP	P55072	CHEMBL1075145	Primary active transporter	0.104671941128	14 / 0
15-hydroxyprostaglandin dehydrogenase [NAD+]	HPGD	P15428	CHEMBL1293255	Enzyme	0.104671941128	67 / 0
Serotonin 3a (5-HT3a) receptor (by homology)	HTR3A	P46098	CHEMBL1899	Ligand-gated ion channel	0.104671941128	17 / 0
Estradiol 17-beta-dehydrogenase 2	HSD17B2	P37059	CHEMBL2789	Enzyme	0.104671941128	62 / 0
Estradiol 17-beta-dehydrogenase 1	HSD17B1	P14061	CHEMBL3181	Enzyme	0.104671941128	67 / 0
Bone morphogenetic protein 1	BMP1	P13497	CHEMBL3898	Protease	0.104671941128	88 / 0
Vasopressin V1a receptor (by homology)	AVPR1A	P37288	CHEMBL1889	Family A G protein-coupled receptor	0.104671941128	25 / 0
Histone deacetylase 3/Nuclear receptor corepressor 2 (HDAC3/NCoR2)	NCOR2 HDAC3	Q9Y618 O15379	CHEMBL2111363	Eraser	0.104671941128	23 / 0
MAP kinase p38 alpha	MAPK14	Q16539	CHEMBL260	Kinase	0.104671941128	125 / 0
Casein kinase I delta	CSNK1D	P48730	CHEMBL2828	Kinase	0.104671941128	9 / 0
Histone deacetylase 11	HDAC11	Q96DB2	CHEMBL3310	Eraser	0.104671941128	47 / 0
Heat shock protein HSP 90-alpha	HSP90AA1	P07900	CHEMBL3880	Other cytosolic protein	0.104671941128	16 / 0
Acyl-CoA desaturase	SCD	O00767	CHEMBL5555	Enzyme	0.104671941128	36 / 0
Aldo-keto reductase family 1 member B10	AKR1B10	O60218	CHEMBL5983	Enzyme	0.104671941128	18 / 9
Phosphodiesterase 4A	PDE4A	P27815	CHEMBL254	Phosphodiesterase	0.104671941128	21 / 0
Phosphodiesterase 4B	PDE4B	Q07343	CHEMBL275	Phosphodiesterase	0.104671941128	29 / 0
Serine/threonine-protein kinase mTOR	MTOR	P42345	CHEMBL2842	Kinase	0.104671941128	121 / 0
Phosphodiesterase 4C	PDE4C	Q08493	CHEMBL291	Phosphodiesterase	0.104671941128	10 / 0
Phospholipase A2 group 1B	PLA2G1B	P04054	CHEMBL4426	Enzyme	0.104671941128	1 / 0
Pyruvate dehydrogenase kinase isoform 1	PDK1	Q15118	CHEMBL4766	Kinase	0.104671941128	68 / 0
c-Jun N-terminal kinase 3	MAPK10	P53779	CHEMBL2637	Kinase	0.104671941128	20 / 0
ADAMTS5	ADAMTS5	Q9UNA0	CHEMBL2285	Protease	0.104671941128	17 / 0
