# Supplementary material for: A Network Pharmacology-Based Study on Irritable Bowel Syndrome Prevention and Treatment Utilizing Shenling Baizhu Powder
Source: Biomed Res Int. 2021 Nov 23;2021:4579850. doi: 10.1155/2021/4579850 (PMC8632384; doi:10.1155/2021/4579850)
Supplement: Supplementary Materials — Please find detailed data in the supplementary file, including the original data of SymMap, metabolomics, and molecular docking of Shenling Baizhu powder. “Shenling Baizhu powder SymMap” includes all herbal targets and combined targets. “Shenling Baizhu powder metabolomics” includes two-dimensional structural data analysis. “Molecular docking” involves molecule-target docking and the results. [file 4579850.f1.zip › Data in brief/2. Shenling Baizhu powder Metabolomics/2D structure/53.csv]

Target	Common name	Uniprot ID	ChEMBL ID	Target Class	Probability*	Known actives (3D/2D)
Aldose reductase	AKR1B1	P15121	CHEMBL1900	Enzyme	0.104671941128	115 / 12
Aldo-keto reductase family 1 member B10	AKR1B10	O60218	CHEMBL5983	Enzyme	0.104671941128	2 / 4
Endothelin-converting enzyme 1	ECE1	P42892	CHEMBL4791	Protease	0.104671941128	9 / 0
Carbonic anhydrase XIII	CA13	Q8N1Q1	CHEMBL3912	Lyase	0.104671941128	9 / 11
Proto-oncogene c-JUN	JUN	P05412	CHEMBL4977	Transcription factor	0.104671941128	0 / 1
Intercellular adhesion molecule (ICAM-1), Integrin alpha-L/beta-2	ITGAL ICAM1 ITGB2	P20701 P05362 P05107	CHEMBL2096661	Membrane receptor	0.104671941128	10 / 0
Cystic fibrosis transmembrane conductance regulator	CFTR	P13569	CHEMBL4051	Other ion channel	0.104671941128	4 / 0
Sialidase 4	NEU4	Q8WWR8	CHEMBL4174	Enzyme	0.104671941128	6 / 0
Angiotensin-converting enzyme (by homology)	ACE	P12821	CHEMBL1808	Protease	0.104671941128	61 / 0
AMP deaminase 3	AMPD3	Q01432	CHEMBL2912	Enzyme	0.104671941128	7 / 0
Cytochrome P450 19A1	CYP19A1	P11511	CHEMBL1978	Cytochrome P450	0.104671941128	0 / 8
Kappa Opioid receptor	OPRK1	P41145	CHEMBL237	Family A G protein-coupled receptor	0.104671941128	0 / 29
Glucose-6-phosphate translocase	SLC37A4	O43826	CHEMBL3217398	Electrochemical transporter	0.104671941128	0 / 2
Caspase-3	CASP3	P42574	CHEMBL2334	Protease	0.104671941128	27 / 0
Caspase-6	CASP6	P55212	CHEMBL3308	Protease	0.104671941128	5 / 0
Caspase-7	CASP7	P55210	CHEMBL3468	Protease	0.104671941128	6 / 0
Caspase-8	CASP8	Q14790	CHEMBL3776	Protease	0.104671941128	6 / 0
Caspase-1	CASP1	P29466	CHEMBL4801	Protease	0.104671941128	7 / 0
Caspase-2	CASP2	P42575	CHEMBL4884	Protease	0.104671941128	3 / 0
Butyrylcholinesterase	BCHE	P06276	CHEMBL1914	Hydrolase	0.104671941128	0 / 1
Acetylcholinesterase	ACHE	P22303	CHEMBL220	Hydrolase	0.104671941128	0 / 2
DNA topoisomerase I	TOP1	P11387	CHEMBL1781	Isomerase	0.104671941128	9 / 0
Alpha-ketoglutarate-dependent dioxygenase FTO	FTO	Q9C0B1	CHEMBL2331065	Oxidoreductase	0.104671941128	2 / 0
Protein kinase C gamma	PRKCG	P05129	CHEMBL2938	Kinase	0.104671941128	0 / 10
Protein kinase C delta	PRKCD	Q05655	CHEMBL2996	Kinase	0.104671941128	0 / 23
Protein kinase C alpha	PRKCA	P17252	CHEMBL299	Kinase	0.104671941128	0 / 57
Protein kinase C beta	PRKCB	P05771	CHEMBL3045	Kinase	0.104671941128	0 / 9
Protein kinase C epsilon	PRKCE	Q02156	CHEMBL3582	Kinase	0.104671941128	0 / 10
Protein kinase C eta	PRKCH	P24723	CHEMBL3616	Kinase	0.104671941128	0 / 9
Protein kinase C theta	PRKCQ	Q04759	CHEMBL3920	Kinase	0.104671941128	0 / 10
Fructose-1,6-bisphosphatase	FBP1	P09467	CHEMBL3975	Enzyme	0.104671941128	22 / 0
Matrix metalloproteinase 16	MMP16	P51512	CHEMBL2200	Protease	0.104671941128	1 / 0
Matrix metalloproteinase 14	MMP14	P50281	CHEMBL3869	Protease	0.104671941128	2 / 0
Carbonic anhydrase II	CA2	P00918	CHEMBL205	Lyase	0.104671941128	130 / 21
Carbonic anhydrase I	CA1	P00915	CHEMBL261	Lyase	0.104671941128	114 / 26
Endo-beta-N-acetylglucosaminidase	ENGASE	Q8NFI3	CHEMBL5172	Enzyme	0.104671941128	1 / 0
DNA (cytosine-5)-methyltransferase 3B	DNMT3B	Q9UBC3	CHEMBL6095	Reader	0.0	2 / 0
P-glycoprotein 1	ABCB1	P08183	CHEMBL4302	Primary active transporter	0.0	0 / 61
Dopamine transporter	SLC6A3	Q01959	CHEMBL238	Electrochemical transporter	0.0	1 / 140
Programmed cell death protein 4	PDCD4	Q53EL6	CHEMBL1781868	Unclassified protein	0.0	1 / 0
c-Jun N-terminal kinase 1	MAPK8	P45983	CHEMBL2276	Kinase	0.0	8 / 0
G protein-coupled receptor kinase 6	GRK6	P43250	CHEMBL6144	Kinase	0.0	11 / 0
Carbonic anhydrase III	CA3	P07451	CHEMBL2885	Lyase	0.0	2 / 2
Egl nine homolog 1	EGLN1	Q9GZT9	CHEMBL5697	Oxidoreductase	0.0	16 / 0
Glutamate carboxypeptidase II	FOLH1	Q04609	CHEMBL1892	Protease	0.0	47 / 0
Adenosine deaminase	ADA	P00813	CHEMBL1910	Hydrolase	0.0	10 / 0
Aldo-keto-reductase family 1 member C3	AKR1C3	P42330	CHEMBL4681	Enzyme	0.0	11 / 14
Glutamate receptor ionotropic kainate 2	GRIK2	Q13002	CHEMBL3683	Ligand-gated ion channel	0.0	2 / 0
Glutamate receptor ionotropic kainate 3	GRIK3	Q13003	CHEMBL3684	Ligand-gated ion channel	0.0	1 / 0
Bifunctional protein NCOAT	OGA	O60502	CHEMBL5921	Enzyme	0.0	26 / 0
Thrombin	F2	P00734	CHEMBL204	Protease	0.0	8 / 13
Matrix metalloproteinase 13	MMP13	P45452	CHEMBL280	Protease	0.0	3 / 3
Matrix metalloproteinase 2	MMP2	P08253	CHEMBL333	Protease	0.0	5 / 4
Serotonin transporter	SLC6A4	P31645	CHEMBL228	Electrochemical transporter	0.0	0 / 91
Cannabinoid receptor 2	CNR2	P34972	CHEMBL253	Family A G protein-coupled receptor	0.0	0 / 23
Adenosine A1 receptor (by homology)	ADORA1	P30542	CHEMBL226	Family A G protein-coupled receptor	0.0	46 / 0
Lysosomal protective protein	CTSA	P10619	CHEMBL6115	Protease	0.0	1 / 0
Muscle glycogen phosphorylase	PYGM	P11217	CHEMBL3526	Enzyme	0.0	19 / 0
Cytidine deaminase (by homology)	CDA	P32320	CHEMBL4502	Enzyme	0.0	15 / 0
Receptor protein-tyrosine kinase erbB-2	ERBB2	P04626	CHEMBL1824	Kinase	0.0	1 / 0
Cyclin-dependent kinase 2	CDK2	P24941	CHEMBL301	Kinase	0.0	1 / 0
Insulin-like growth factor binding protein 3	IGFBP3	P17936	CHEMBL3997	Secreted protein	0.0	17 / 0
Estradiol 17-beta-dehydrogenase 2	HSD17B2	P37059	CHEMBL2789	Enzyme	0.0	0 / 2
Monoglyceride lipase	MGLL	Q99685	CHEMBL4191	Enzyme	0.0	0 / 5
Thymidylate synthase	TYMS	P04818	CHEMBL1952	Transferase	0.0	22 / 0
Trehalase	TREH	O43280	CHEMBL3087	Enzyme	0.0	1 / 0
Acyl-protein thioesterase 1	LYPLA1	O75608	CHEMBL1681631	Enzyme	0.0	0 / 1
Acyl-protein thioesterase 2	LYPLA2	O95372	CHEMBL1932891	Enzyme	0.0	0 / 1
Dual specificity mitogen-activated protein kinase kinase 1	MAP2K1	Q02750	CHEMBL3587	Kinase	0.0	0 / 1
LXR-alpha	NR1H3	Q13133	CHEMBL2808	Nuclear receptor	0.0	0 / 9
LXR-beta	NR1H2	P55055	CHEMBL4093	Nuclear receptor	0.0	0 / 8
NADPH oxidase 4	NOX4	Q9NPH5	CHEMBL1250375	Enzyme	0.0	2 / 0
Hypoxanthine-guanine phosphoribosyltransferase	HPRT1	P00492	CHEMBL2360	Enzyme	0.0	2 / 0
Adenosine A2a receptor (by homology)	ADORA2A	P29274	CHEMBL251	Family A G protein-coupled receptor	0.0	31 / 0
Sialidase 2	NEU2	Q9Y3R4	CHEMBL3200	Enzyme	0.0	4 / 0
CaM-kinase kinase beta	CAMKK2	Q96RR4	CHEMBL5284	Kinase	0.0	1 / 0
Aminopeptidase A	ENPEP	Q07075	CHEMBL3439	Protease	0.0	22 / 0
Testis-specific androgen-binding protein	SHBG	P04278	CHEMBL3305	Secreted protein	0.0	0 / 5
Estrogen receptor beta	ESR2	Q92731	CHEMBL242	Nuclear receptor	0.0	4 / 18
Insulin receptor	INSR	P06213	CHEMBL1981	Kinase	0.0	1 / 0
Maltase-glucoamylase	MGAM	O43451	CHEMBL2074	Hydrolase	0.0	23 / 0
NAALADase II	NAALAD2	Q9Y3Q0	CHEMBL2609	Protease	0.0	10 / 0
PI3-kinase p110-gamma subunit	PIK3CG	P48736	CHEMBL3267	Enzyme	0.0	3 / 0
PI3-kinase p110-alpha subunit	PIK3CA	P42336	CHEMBL4005	Enzyme	0.0	3 / 0
Transitional endoplasmic reticulum ATPase	VCP	P55072	CHEMBL1075145	Primary active transporter	0.0	1 / 0
G protein-coupled receptor 44	PTGDR2	Q9Y5Y4	CHEMBL5071	Family A G protein-coupled receptor	0.0	10 / 0
Lysine-specific demethylase 4D	KDM4D	Q6B0I6	CHEMBL6138	Eraser	0.0	2 / 0
Lysine-specific demethylase 4C	KDM4C	Q9H3R0	CHEMBL6175	Eraser	0.0	11 / 0
Insulin-like growth factor binding protein 5	IGFBP5	P24593	CHEMBL2665	Secreted protein	0.0	5 / 0
Peroxisome proliferator-activated receptor delta (by homology)	PPARD	Q03181	CHEMBL3979	Nuclear receptor	0.0	0 / 14
Hydroxycarboxylic acid receptor 2	HCAR2	Q8TDS4	CHEMBL3785	Family A G protein-coupled receptor	0.0	8 / 0
Prostanoid FP receptor	PTGFR	P43088	CHEMBL1987	Family A G protein-coupled receptor	0.0	0 / 15
G-protein coupled receptor 35	GPR35	Q9HC97	CHEMBL1293267	Family A G protein-coupled receptor	0.0	7 / 0
ADAMTS5	ADAMTS5	Q9UNA0	CHEMBL2285	Protease	0.0	1 / 0
Sucrase-isomaltase	SI	P14410	CHEMBL2748	Enzyme	0.0	23 / 0
Interleukin-8 receptor B	CXCR2	P25025	CHEMBL2434	Family A G protein-coupled receptor	0.0	3 / 0
Purine nucleoside phosphorylase	PNP	P00491	CHEMBL4338	Enzyme	0.0	37 / 0
Integrin alpha-4/beta-1	ITGB1 ITGA4	P05556 P13612	CHEMBL1907599	Membrane receptor	0.0	9 / 0
HMG-CoA reductase	HMGCR	P04035	CHEMBL402	Oxidoreductase	0.0	11 / 47
Dihydroorotate dehydrogenase	DHODH	Q02127	CHEMBL1966	Oxidoreductase	0.0	5 / 0
