# Supplementary material for: A Network Pharmacology-Based Study on Irritable Bowel Syndrome Prevention and Treatment Utilizing Shenling Baizhu Powder
Source: Biomed Res Int. 2021 Nov 23;2021:4579850. doi: 10.1155/2021/4579850 (PMC8632384; doi:10.1155/2021/4579850)
Supplement: Supplementary Materials — Please find detailed data in the supplementary file, including the original data of SymMap, metabolomics, and molecular docking of Shenling Baizhu powder. “Shenling Baizhu powder SymMap” includes all herbal targets and combined targets. “Shenling Baizhu powder metabolomics” includes two-dimensional structural data analysis. “Molecular docking” involves molecule-target docking and the results. [file 4579850.f1.zip › Data in brief/2. Shenling Baizhu powder Metabolomics/2D structure/54.csv]

Target	Common name	Uniprot ID	ChEMBL ID	Target Class	Probability*	Known actives (3D/2D)
Phosphodiesterase 5A	PDE5A	O76074	CHEMBL1827	Phosphodiesterase	1.0	4 / 12
P-glycoprotein 1	ABCB1	P08183	CHEMBL4302	Primary active transporter	0.825424896915	16 / 47
Serine/threonine-protein kinase AKT	AKT1	P31749	CHEMBL4282	Kinase	0.624540901045	3 / 4
Beta-secretase 1	BACE1	P56817	CHEMBL4822	Protease	0.155798172151	14 / 15
Cytochrome P450 19A1	CYP19A1	P11511	CHEMBL1978	Cytochrome P450	0.139088623131	4 / 18
Protein-tyrosine phosphatase 1B	PTPN1	P18031	CHEMBL335	Phosphatase	0.105608279572	9 / 26
Estrogen receptor alpha	ESR1	P03372	CHEMBL206	Nuclear receptor	0.105608279572	22 / 26
Estrogen receptor beta	ESR2	Q92731	CHEMBL242	Nuclear receptor	0.105608279572	22 / 25
Estradiol 17-beta-dehydrogenase 1	HSD17B1	P14061	CHEMBL3181	Enzyme	0.0972399887602	4 / 4
Glycogen synthase kinase-3 beta	GSK3B	P49841	CHEMBL262	Kinase	0.0972399887602	8 / 4
ALK tyrosine kinase receptor	ALK	Q9UM73	CHEMBL4247	Kinase	0.0972399887602	2 / 4
Aldose reductase (by homology)	AKR1B1	P15121	CHEMBL1900	Enzyme	0.0972399887602	13 / 58
Butyrylcholinesterase	BCHE	P06276	CHEMBL1914	Hydrolase	0.0972399887602	1 / 7
Acetylcholinesterase	ACHE	P22303	CHEMBL220	Hydrolase	0.0972399887602	2 / 26
Cystic fibrosis transmembrane conductance regulator	CFTR	P13569	CHEMBL4051	Other ion channel	0.0972399887602	1 / 1
Arachidonate 15-lipoxygenase	ALOX15	P16050	CHEMBL2903	Enzyme	0.0972399887602	7 / 6
Cyclooxygenase-2	PTGS2	P35354	CHEMBL230	Oxidoreductase	0.0972399887602	3 / 10
Glucagon receptor	GCGR	P47871	CHEMBL1985	Family B G protein-coupled receptor	0.0972399887602	12 / 0
Peroxisome proliferator-activated receptor gamma	PPARG	P37231	CHEMBL235	Nuclear receptor	0.0972399887602	1 / 2
Endoplasmin	HSP90B1	P14625	CHEMBL1075323	Other membrane protein	0.0972399887602	43 / 0
NADPH oxidase 4	NOX4	Q9NPH5	CHEMBL1250375	Enzyme	0.0972399887602	2 / 7
Estradiol 17-beta-dehydrogenase 2	HSD17B2	P37059	CHEMBL2789	Enzyme	0.0972399887602	4 / 3
Tyrosine-protein kinase SYK	SYK	P43405	CHEMBL2599	Kinase	0.0972399887602	0 / 3
Multidrug resistance-associated protein 1	ABCC1	P33527	CHEMBL3004	Primary active transporter	0.0972399887602	0 / 11
Transthyretin	TTR	P02766	CHEMBL3194	Secreted protein	0.0972399887602	0 / 2
Casein kinase II alpha	CSNK2A1	P68400	CHEMBL3629	Kinase	0.0972399887602	0 / 2
Aldo-keto reductase family 1 member B10	AKR1B10	O60218	CHEMBL5983	Enzyme	0.0972399887602	0 / 3
Tankyrase-2	TNKS2	Q9H2K2	CHEMBL6154	Enzyme	0.0972399887602	0 / 12
Tankyrase-1	TNKS	O95271	CHEMBL6164	Enzyme	0.0972399887602	0 / 27
C-C chemokine receptor type 4	CCR4	P51679	CHEMBL2414	Family A G protein-coupled receptor	0.0972399887602	7 / 0
Heat shock protein HSP 90-alpha	HSP90AA1	P07900	CHEMBL3880	Other cytosolic protein	0.0972399887602	44 / 0
Arachidonate 12-lipoxygenase	ALOX12	P18054	CHEMBL3687	Enzyme	0.0972399887602	5 / 7
Carbonyl reductase [NADPH] 1	CBR1	P16152	CHEMBL5586	Enzyme	0.0972399887602	1 / 2
Receptor-type tyrosine-protein phosphatase S	PTPRS	Q13332	CHEMBL2396508	Phosphatase	0.0972399887602	0 / 8
AMY1C	AMY1A	P04745	CHEMBL2478	Enzyme	0.0972399887602	0 / 1
G protein-coupled receptor kinase 6	GRK6	P43250	CHEMBL6144	Kinase	0.0972399887602	0 / 3
Protein farnesyltransferase	FNTA FNTB	P49354 P49356	CHEMBL2094108	Enzyme	0.0972399887602	1 / 0
Heat shock protein HSP 90-beta	HSP90AB1	P08238	CHEMBL4303	Other cytosolic protein	0.0972399887602	21 / 0
Vasopressin V2 receptor	AVPR2	P30518	CHEMBL1790	Family A G protein-coupled receptor	0.0972399887602	2 / 1
Interleukin-8 receptor A	CXCR1	P25024	CHEMBL4029	Family A G protein-coupled receptor	0.0972399887602	2 / 1
Adenosine A3 receptor	ADORA3	P0DMS8	CHEMBL256	Family A G protein-coupled receptor	0.0972399887602	0 / 19
ATP-binding cassette sub-family G member 2	ABCG2	Q9UNQ0	CHEMBL5393	Primary active transporter	0.0972399887602	1 / 48
Receptor protein-tyrosine kinase erbB-2	ERBB2	P04626	CHEMBL1824	Kinase	0.0972399887602	5 / 0
NEDD8-activating enzyme E1 regulatory subunit	NAE1	Q13564	CHEMBL2016431	Unclassified protein	0.0972399887602	0 / 1
G-protein coupled receptor 84	GPR84	Q9NQS5	CHEMBL3714079	Family A G protein-coupled receptor	0.0972399887602	3 / 0
Poly [ADP-ribose] polymerase-1	PARP1	P09874	CHEMBL3105	Enzyme	0.0972399887602	0 / 9
Matrix metalloproteinase 12	MMP12	P39900	CHEMBL4393	Protease	0.0972399887602	0 / 1
Lymphocyte differentiation antigen CD38	CD38	P28907	CHEMBL4660	Enzyme	0.0972399887602	0 / 2
DNA topoisomerase I (by homology)	TOP1	P11387	CHEMBL1781	Isomerase	0.0972399887602	0 / 1
Arginase-1 (by homology)	ARG1	P05089	CHEMBL1075097	Enzyme	0.0972399887602	0 / 2
Phosphodiesterase 10A	PDE10A	Q9Y233	CHEMBL4409	Phosphodiesterase	0.0972399887602	8 / 0
Egl nine homolog 1	EGLN1	Q9GZT9	CHEMBL5697	Oxidoreductase	0.0972399887602	8 / 0
Cyclin-dependent kinase 4/cyclin D1	CCND1 CDK4	P24385 P11802	CHEMBL1907601	Kinase	0.0972399887602	19 / 14
Cyclooxygenase-1	PTGS1	P23219	CHEMBL221	Oxidoreductase	0.0972399887602	1 / 4
Dihydrofolate reductase	DHFR	P00374	CHEMBL202	Oxidoreductase	0.0972399887602	1 / 0
Monoamine oxidase A	MAOA	P21397	CHEMBL1951	Oxidoreductase	0.0972399887602	3 / 7
Lysine-specific demethylase 4D-like	KDM4E	B2RXH2	CHEMBL1293226	Eraser	0.0972399887602	0 / 2
6-phosphofructo-2-kinase/fructose-2,6-bisphosphatase 3	PFKFB3	Q16875	CHEMBL2331053	Enzyme	0.0972399887602	0 / 2
Cyclin-dependent kinase 1	CDK1	P06493	CHEMBL308	Kinase	0.0972399887602	13 / 10
Epidermal growth factor receptor erbB1	EGFR	P00533	CHEMBL203	Kinase	0.0972399887602	10 / 28
Alkaline phosphatase, tissue-nonspecific isozyme	ALPL	P05186	CHEMBL5979	Enzyme	0.0972399887602	1 / 0
Tyrosinase	TYR	P14679	CHEMBL1973	Oxidoreductase	0.0972399887602	0 / 2
Aryl hydrocarbon receptor	AHR	P35869	CHEMBL3201	Transcription factor	0.0972399887602	0 / 1
Estrogen-related receptor alpha	ESRRA	P11474	CHEMBL3429	Nuclear receptor	0.0972399887602	0 / 2
Apoptosis regulator Bcl-X	BCL2L1	Q07817	CHEMBL4625	Other ion channel	0.0972399887602	3 / 2
Apoptosis regulator Bcl-2	BCL2	P10415	CHEMBL4860	Other ion channel	0.0972399887602	9 / 5
Transitional endoplasmic reticulum ATPase	VCP	P55072	CHEMBL1075145	Primary active transporter	0.0972399887602	0 / 1
Placenta growth factor	PGF	P49763	CHEMBL1697671	Unclassified protein	0.0972399887602	0 / 1
Vascular endothelial growth factor A	VEGFA	P15692	CHEMBL1783	Secreted protein	0.0972399887602	0 / 1
GABA-A receptor; alpha-1/beta-2/gamma-2	GABRA1 GABRB2 GABRG2	P14867 P47870 P18507	CHEMBL2095172	Ligand-gated ion channel	0.0972399887602	0 / 1
Serotonin 2c (5-HT2c) receptor	HTR2C	P28335	CHEMBL225	Family A G protein-coupled receptor	0.0972399887602	0 / 2
Cyclin-dependent kinase 6	CDK6	Q00534	CHEMBL2508	Kinase	0.0972399887602	2 / 4
Cyclin-dependent kinase 5/CDK5 activator 1	CDK5R1 CDK5	Q15078 Q00535	CHEMBL1907600	Kinase	0.0972399887602	12 / 17
Histone acetyltransferase p300	EP300	Q09472	CHEMBL3784	Writer	0.0972399887602	1 / 0
Cyclin-dependent kinase 1/cyclin B	CCNB3 CDK1 CCNB1 CCNB2	Q8WWL7 P06493 P14635 O95067	CHEMBL2094127	Other cytosolic protein	0.0972399887602	8 / 12
Carbonic anhydrase II	CA2	P00918	CHEMBL205	Lyase	0.0972399887602	16 / 8
Carbonic anhydrase IV	CA4	P22748	CHEMBL3729	Lyase	0.0972399887602	2 / 7
Matrix metalloproteinase 9	MMP9	P14780	CHEMBL321	Protease	0.0972399887602	1 / 2
Matrix metalloproteinase 2	MMP2	P08253	CHEMBL333	Protease	0.0972399887602	1 / 2
Carbonic anhydrase I	CA1	P00915	CHEMBL261	Lyase	0.0	8 / 6
Carbonic anhydrase XII	CA12	O43570	CHEMBL3242	Lyase	0.0	7 / 12
Carbonic anhydrase IX	CA9	Q16790	CHEMBL3594	Lyase	0.0	8 / 6
Catechol O-methyltransferase (by homology)	COMT	P21964	CHEMBL2023	Transferase	0.0	10 / 0
Death-associated protein kinase 1	DAPK1	P53355	CHEMBL2558	Kinase	0.0	0 / 2
DNA-3-methyladenine glycosylase	MPG	P29372	CHEMBL3396943	Enzyme	0.0	0 / 1
Beta amyloid A4 protein	APP	P05067	CHEMBL2487	Membrane receptor	0.0	2 / 6
Serine/threonine-protein kinase Chk1	CHEK1	O14757	CHEMBL4630	Kinase	0.0	20 / 0
Pyruvate dehydrogenase kinase isoform 1	PDK1	Q15118	CHEMBL4766	Kinase	0.0	18 / 0
Microtubule-associated protein tau	MAPT	P10636	CHEMBL1293224	Unclassified protein	0.0	0 / 1
DNA topoisomerase II alpha	TOP2A	P11388	CHEMBL1806	Isomerase	0.0	0 / 1
Myosin light chain kinase, smooth muscle	MYLK	Q15746	CHEMBL2428	Kinase	0.0	0 / 1
Myeloperoxidase	MPO	P05164	CHEMBL2439	Enzyme	0.0	0 / 1
PI3-kinase p85-alpha subunit	PIK3R1	P27986	CHEMBL2506	Enzyme	0.0	0 / 1
Liver glycogen phosphorylase	PYGL	P06737	CHEMBL2568	Enzyme	0.0	0 / 1
Matrix metalloproteinase 13	MMP13	P45452	CHEMBL280	Protease	0.0	0 / 1
Matrix metalloproteinase 3	MMP3	P08254	CHEMBL283	Protease	0.0	0 / 1
Carbonic anhydrase III	CA3	P07451	CHEMBL2885	Lyase	0.0	0 / 1
Serine/threonine-protein kinase PLK1	PLK1	P53350	CHEMBL3024	Kinase	0.0	0 / 3
Serine/threonine-protein kinase NEK2	NEK2	P51955	CHEMBL3835	Kinase	0.0	0 / 2
Carbonic anhydrase XIII (by homology)	CA13	Q8N1Q1	CHEMBL3912	Lyase	0.0	0 / 2
