# Supplementary material for: A Network Pharmacology-Based Study on Irritable Bowel Syndrome Prevention and Treatment Utilizing Shenling Baizhu Powder
Source: Biomed Res Int. 2021 Nov 23;2021:4579850. doi: 10.1155/2021/4579850 (PMC8632384; doi:10.1155/2021/4579850)
Supplement: Supplementary Materials — Please find detailed data in the supplementary file, including the original data of SymMap, metabolomics, and molecular docking of Shenling Baizhu powder. “Shenling Baizhu powder SymMap” includes all herbal targets and combined targets. “Shenling Baizhu powder metabolomics” includes two-dimensional structural data analysis. “Molecular docking” involves molecule-target docking and the results. [file 4579850.f1.zip › Data in brief/2. Shenling Baizhu powder Metabolomics/2D structure/55.csv]

Target	Common name	Uniprot ID	ChEMBL ID	Target Class	Probability*	Known actives (3D/2D)
ATP-binding cassette sub-family G member 2	ABCG2	Q9UNQ0	CHEMBL5393	Primary active transporter	0.122339193554	18 / 50
Arachidonate 5-lipoxygenase	ALOX5	P09917	CHEMBL215	Oxidoreductase	0.113979814646	98 / 30
3-phosphoinositide dependent protein kinase-1	PDPK1	O15530	CHEMBL2534	Kinase	0.113979814646	20 / 1
Aldose reductase	AKR1B1	P15121	CHEMBL1900	Enzyme	0.105608279572	64 / 40
Protein-tyrosine phosphatase 1B	PTPN1	P18031	CHEMBL335	Phosphatase	0.105608279572	61 / 36
Monoamine oxidase B	MAOB	P27338	CHEMBL2039	Oxidoreductase	0.105608279572	62 / 108
Neuronal acetylcholine receptor protein alpha-7 subunit	CHRNA7	P36544	CHEMBL2492	Ligand-gated ion channel	0.105608279572	21 / 11
Cytochrome P450 19A1	CYP19A1	P11511	CHEMBL1978	Cytochrome P450	0.105608279572	41 / 27
Cyclooxygenase-2	PTGS2	P35354	CHEMBL230	Oxidoreductase	0.0972399887602	70 / 30
Nitric oxide synthase, inducible	NOS2	P35228	CHEMBL4481	Enzyme	0.0972399887602	53 / 10
Beta amyloid A4 protein	APP	P05067	CHEMBL2487	Membrane receptor	0.0972399887602	42 / 15
Coagulation factor VII/tissue factor	F3	P13726	CHEMBL4081	Surface antigen	0.0972399887602	10 / 6
Beta-secretase 1	BACE1	P56817	CHEMBL4822	Protease	0.0972399887602	429 / 31
Cyclooxygenase-1	PTGS1	P23219	CHEMBL221	Oxidoreductase	0.0972399887602	29 / 13
Tyrosinase	TYR	P14679	CHEMBL1973	Oxidoreductase	0.0972399887602	2 / 0
Acetylcholinesterase	ACHE	P22303	CHEMBL220	Hydrolase	0.0972399887602	182 / 57
Ornithine decarboxylase	ODC1	P11926	CHEMBL1869	Lyase	0.0972399887602	6 / 10
Histone deacetylase 3	HDAC3	O15379	CHEMBL1829	Eraser	0.0972399887602	203 / 0
Histone deacetylase 6	HDAC6	Q9UBN7	CHEMBL1865	Eraser	0.0972399887602	536 / 0
Histone deacetylase 5	HDAC5	Q9UQL6	CHEMBL2563	Eraser	0.0972399887602	35 / 0
Histone deacetylase 7	HDAC7	Q8WUI4	CHEMBL2716	Eraser	0.0972399887602	42 / 0
Histone deacetylase 8	HDAC8	Q9BY41	CHEMBL3192	Eraser	0.0972399887602	353 / 0
Histone deacetylase 1	HDAC1	Q13547	CHEMBL325	Eraser	0.0972399887602	730 / 0
Histone deacetylase 4	HDAC4	P56524	CHEMBL3524	Eraser	0.0972399887602	63 / 0
Histone deacetylase 9	HDAC9	Q9UKV0	CHEMBL4145	Eraser	0.0972399887602	35 / 0
Histone deacetylase 10	HDAC10	Q969S8	CHEMBL5103	Eraser	0.0972399887602	57 / 0
Cathepsin D	CTSD	P07339	CHEMBL2581	Protease	0.0972399887602	28 / 0
Sodium/glucose cotransporter 1	SLC5A1	P13866	CHEMBL4979	Electrochemical transporter	0.0972399887602	164 / 0
Monoamine oxidase A	MAOA	P21397	CHEMBL1951	Oxidoreductase	0.0972399887602	49 / 34
Voltage-gated potassium channel subunit Kv1.3	KCNA3	P22001	CHEMBL4633	Voltage-gated ion channel	0.0972399887602	11 / 8
Phospholipase A2 group 1B	PLA2G1B	P04054	CHEMBL4426	Enzyme	0.0972399887602	1 / 0
Pyruvate dehydrogenase kinase isoform 1	PDK1	Q15118	CHEMBL4766	Kinase	0.0972399887602	102 / 0
P-glycoprotein 1	ABCB1	P08183	CHEMBL4302	Primary active transporter	0.0972399887602	53 / 18
Epidermal growth factor receptor erbB1	EGFR	P00533	CHEMBL203	Kinase	0.0972399887602	161 / 15
Protein Mdm4	MDM4	O15151	CHEMBL1255126	Unclassified protein	0.0972399887602	5 / 0
p53-binding protein Mdm-2	MDM2	Q00987	CHEMBL5023	Other nuclear protein	0.0972399887602	155 / 0
Cytochrome P450 11B1	CYP11B1	P15538	CHEMBL1908	Cytochrome P450	0.0972399887602	12 / 0
Tyrosine-protein kinase receptor FLT3	FLT3	P36888	CHEMBL1974	Kinase	0.0972399887602	86 / 0
Cytochrome P450 11B2	CYP11B2	P19099	CHEMBL2722	Cytochrome P450	0.0972399887602	12 / 0
Tyrosine-protein kinase JAK2	JAK2	O60674	CHEMBL2971	Kinase	0.0972399887602	78 / 0
Equilibrative nucleoside transporter 1	SLC29A1	Q99808	CHEMBL1997	Electrochemical transporter	0.0972399887602	24 / 0
Transient receptor potential cation channel subfamily M member 8	TRPM8	Q7Z2W7	CHEMBL1075319	Voltage-gated ion channel	0.0972399887602	14 / 0
MAP kinase-activated protein kinase 2	MAPKAPK2	P49137	CHEMBL2208	Kinase	0.0972399887602	48 / 1
Butyrylcholinesterase	BCHE	P06276	CHEMBL1914	Hydrolase	0.0972399887602	49 / 5
Platelet-derived growth factor receptor beta	PDGFRB	P09619	CHEMBL1913	Kinase	0.0972399887602	53 / 0
Bone morphogenetic protein 1	BMP1	P13497	CHEMBL3898	Protease	0.0972399887602	145 / 0
Transitional endoplasmic reticulum ATPase	VCP	P55072	CHEMBL1075145	Primary active transporter	0.0972399887602	21 / 0
Bile acid receptor FXR	NR1H4	Q96RI1	CHEMBL2047	Nuclear receptor	0.0972399887602	25 / 0
Rho-associated protein kinase	ROCK2 ROCK1	O75116 Q13464	CHEMBL2111459	Kinase	0.0972399887602	38 / 0
Matrix metalloproteinase 9	MMP9	P14780	CHEMBL321	Protease	0.0972399887602	332 / 0
Matrix metalloproteinase 8	MMP8	P22894	CHEMBL4588	Protease	0.0972399887602	151 / 0
Thyroid hormone receptor alpha	THRA	P10827	CHEMBL1860	Nuclear receptor	0.0972399887602	14 / 0
Thyroid hormone receptor beta-1	THRB	P10828	CHEMBL1947	Nuclear receptor	0.0972399887602	14 / 0
Ribosomal protein S6 kinase 1	RPS6KB1	P23443	CHEMBL4501	Kinase	0.0972399887602	205 / 0
Hematopoietic prostaglandin D synthase	HPGDS	O60760	CHEMBL5879	Transferase	0.0972399887602	16 / 0
Sodium/glucose cotransporter 2	SLC5A2	P31639	CHEMBL3884	Electrochemical transporter	0.0972399887602	6 / 0
Intercellular adhesion molecule (ICAM-1), Integrin alpha-L/beta-2	ITGAL ICAM1 ITGB2	P20701 P05362 P05107	CHEMBL2096661	Membrane receptor	0.0972399887602	8 / 0
Serine/threonine-protein kinase RAF	RAF1	P04049	CHEMBL1906	Kinase	0.0972399887602	39 / 0
Calpain 1	CAPN1	P07384	CHEMBL3891	Protease	0.0972399887602	35 / 0
Serine/threonine-protein kinase B-raf	BRAF	P15056	CHEMBL5145	Kinase	0.0972399887602	101 / 0
Tyrosine-protein kinase ABL	ABL1	P00519	CHEMBL1862	Kinase	0.0972399887602	70 / 0
ADAM17	ADAM17	P78536	CHEMBL3706	Protease	0.0972399887602	166 / 0
Serine/threonine-protein kinase/endoribonuclease IRE1	ERN1	O75460	CHEMBL1163101	Enzyme	0.0972399887602	21 / 0
Dual specificity phosphatase Cdc25A	CDC25A	P30304	CHEMBL3775	Phosphatase	0.0972399887602	7 / 0
Dual specificity phosphatase Cdc25B	CDC25B	P30305	CHEMBL4804	Phosphatase	0.0972399887602	13 / 0
c-Jun N-terminal kinase 3	MAPK10	P53779	CHEMBL2637	Kinase	0.0972399887602	26 / 0
Histone deacetylase 11	HDAC11	Q96DB2	CHEMBL3310	Eraser	0.0972399887602	56 / 0
Matrix metalloproteinase 1	MMP1	P03956	CHEMBL332	Protease	0.0972399887602	375 / 0
MAP kinase ERK2	MAPK1	P28482	CHEMBL4040	Kinase	0.0972399887602	194 / 0
Phosphodiesterase 10A	PDE10A	Q9Y233	CHEMBL4409	Phosphodiesterase	0.0972399887602	80 / 0
Gonadotropin-releasing hormone receptor	GNRHR	P30968	CHEMBL1855	Family A G protein-coupled receptor	0.0972399887602	55 / 0
Tyrosine-protein kinase ITK/TSK	ITK	Q08881	CHEMBL2959	Kinase	0.0972399887602	83 / 0
Protein kinase C beta	PRKCB	P05771	CHEMBL3045	Kinase	0.0972399887602	31 / 0
Kinesin-1 heavy chain/ Tyrosine-protein kinase receptor RET	RET	P07949	CHEMBL2041	Kinase	0.0972399887602	22 / 0
MAP kinase p38 alpha	MAPK14	Q16539	CHEMBL260	Kinase	0.0972399887602	171 / 0
Neuronal acetylcholine receptor; alpha4/beta2	CHRNA4 CHRNB2	P43681 P17787	CHEMBL1907589	Ligand-gated ion channel	0.0972399887602	10 / 0
Gamma-secretase	PSEN2 PSENEN NCSTN APH1A PSEN1 APH1B	P49810 Q9NZ42 Q92542 Q96BI3 P49768 Q8WW43	CHEMBL2094135	Protease	0.0972399887602	37 / 0
Adenosine A2b receptor	ADORA2B	P29275	CHEMBL255	Family A G protein-coupled receptor	0.0972399887602	23 / 0
Phospholipase A2 group IIA	PLA2G2A	P14555	CHEMBL3474	Enzyme	0.0972399887602	12 / 0
Estrogen-related receptor beta	ESRRB	O95718	CHEMBL3751	Nuclear receptor	0.0972399887602	6 / 0
N-acylsphingosine-amidohydrolase	NAAA	Q02083	CHEMBL4349	Enzyme	0.0972399887602	6 / 0
Matrix metalloproteinase 13	MMP13	P45452	CHEMBL280	Protease	0.0972399887602	254 / 0
Orexin receptor 2	HCRTR2	O43614	CHEMBL4792	Family A G protein-coupled receptor	0.0972399887602	40 / 0
ADAM10	ADAM10	O14672	CHEMBL5028	Protease	0.0972399887602	39 / 0
Histone deacetylase 3/Nuclear receptor corepressor 2 (HDAC3/NCoR2)	NCOR2 HDAC3	Q9Y618 O15379	CHEMBL2111363	Eraser	0.0972399887602	26 / 0
Fatty acid synthase	FASN	P49327	CHEMBL4158	Transferase	0.0972399887602	18 / 0
Neurokinin 3 receptor	TACR3	P29371	CHEMBL4429	Family A G protein-coupled receptor	0.0972399887602	23 / 0
Neuropeptide Y receptor type 5	NPY5R	Q15761	CHEMBL4561	Family A G protein-coupled receptor	0.0972399887602	60 / 0
Phosphodiesterase 4B	PDE4B	Q07343	CHEMBL275	Phosphodiesterase	0.0972399887602	32 / 0
Serine/threonine-protein kinase PIM1	PIM1	P11309	CHEMBL2147	Kinase	0.0972399887602	31 / 0
Serotonin 1a (5-HT1a) receptor	HTR1A	P08908	CHEMBL214	Family A G protein-coupled receptor	0.0972399887602	368 / 0
Alpha-1b adrenergic receptor	ADRA1B	P35368	CHEMBL232	Family A G protein-coupled receptor	0.0972399887602	110 / 0
P2X purinoceptor 3	P2RX3	P56373	CHEMBL2998	Ligand-gated ion channel	0.0972399887602	171 / 0
Serine/threonine-protein kinase PIM2	PIM2	Q9P1W9	CHEMBL4523	Kinase	0.0972399887602	21 / 0
Serine/threonine-protein kinase PIM3	PIM3	Q86V86	CHEMBL5407	Kinase	0.0972399887602	13 / 0
Inosine-5'-monophosphate dehydrogenase 1	IMPDH1	P20839	CHEMBL1822	Oxidoreductase	0.0972399887602	17 / 0
Macrophage migration inhibitory factor	MIF	P14174	CHEMBL2085	Enzyme	0.0972399887602	18 / 0
Sphingosine 1-phosphate receptor Edg-3	S1PR3	Q99500	CHEMBL3892	Family A G protein-coupled receptor	0.0972399887602	47 / 0
Sphingosine 1-phosphate receptor Edg-1	S1PR1	P21453	CHEMBL4333	Family A G protein-coupled receptor	0.0972399887602	47 / 0
Protein-tyrosine phosphatase 1C	PTPN6	P29350	CHEMBL3166	Phosphatase	0.0972399887602	5 / 0
