# Supplementary material for: A Network Pharmacology-Based Study on Irritable Bowel Syndrome Prevention and Treatment Utilizing Shenling Baizhu Powder
Source: Biomed Res Int. 2021 Nov 23;2021:4579850. doi: 10.1155/2021/4579850 (PMC8632384; doi:10.1155/2021/4579850)
Supplement: Supplementary Materials — Please find detailed data in the supplementary file, including the original data of SymMap, metabolomics, and molecular docking of Shenling Baizhu powder. “Shenling Baizhu powder SymMap” includes all herbal targets and combined targets. “Shenling Baizhu powder metabolomics” includes two-dimensional structural data analysis. “Molecular docking” involves molecule-target docking and the results. [file 4579850.f1.zip › Data in brief/2. Shenling Baizhu powder Metabolomics/2D structure/56.csv]

Target	Common name	Uniprot ID	ChEMBL ID	Target Class	Probability*	Known actives (3D/2D)
Aldose reductase	AKR1B1	P15121	CHEMBL1900	Enzyme	0.457099387995	43 / 71
Mu opioid receptor	OPRM1	P35372	CHEMBL233	Family A G protein-coupled receptor	0.281242088383	48 / 1
Delta opioid receptor	OPRD1	P41143	CHEMBL236	Family A G protein-coupled receptor	0.264483764407	32 / 5
ATP-binding cassette sub-family G member 2	ABCG2	Q9UNQ0	CHEMBL5393	Primary active transporter	0.264483764407	115 / 48
Cyclooxygenase-2	PTGS2	P35354	CHEMBL230	Oxidoreductase	0.256161866082	250 / 24
Nitric oxide synthase, inducible	NOS2	P35228	CHEMBL4481	Enzyme	0.239365342596	68 / 3
Stem cell growth factor receptor	KIT	P10721	CHEMBL1936	Kinase	0.17256261086	130 / 3
Adenosine A3 receptor	ADORA3	P0DMS8	CHEMBL256	Family A G protein-coupled receptor	0.155798172151	486 / 22
Adenosine A1 receptor	ADORA1	P30542	CHEMBL226	Family A G protein-coupled receptor	0.147460273963	773 / 23
Adenosine A2a receptor	ADORA2A	P29274	CHEMBL251	Family A G protein-coupled receptor	0.147460273963	760 / 11
Arachidonate 5-lipoxygenase	ALOX5	P09917	CHEMBL215	Oxidoreductase	0.130706652821	161 / 46
Serine/threonine-protein kinase PIM1	PIM1	P11309	CHEMBL2147	Kinase	0.113979814646	135 / 7
Cytochrome P450 1B1	CYP1B1	Q16678	CHEMBL4878	Cytochrome P450	0.113979814646	28 / 46
P-glycoprotein 1	ABCB1	P08183	CHEMBL4302	Primary active transporter	0.113979814646	107 / 47
Induced myeloid leukemia cell differentiation protein Mcl-1	MCL1	Q07820	CHEMBL4361	Other cytosolic protein	0.105608279572	28 / 4
6-phosphofructo-2-kinase/fructose-2,6-bisphosphatase 3	PFKFB3	Q16875	CHEMBL2331053	Enzyme	0.105608279572	136 / 2
Tyrosine-protein kinase receptor FLT3	FLT3	P36888	CHEMBL1974	Kinase	0.105608279572	201 / 7
Cytochrome P450 19A1	CYP19A1	P11511	CHEMBL1978	Cytochrome P450	0.105608279572	165 / 18
Tyrosine-protein kinase SYK	SYK	P43405	CHEMBL2599	Kinase	0.105608279572	417 / 3
Telomerase reverse transcriptase	TERT	O14746	CHEMBL2916	Enzyme	0.105608279572	36 / 22
Tankyrase-2	TNKS2	Q9H2K2	CHEMBL6154	Enzyme	0.0972399887602	32 / 12
Tankyrase-1	TNKS	O95271	CHEMBL6164	Enzyme	0.0972399887602	47 / 28
Estradiol 17-beta-dehydrogenase 2	HSD17B2	P37059	CHEMBL2789	Enzyme	0.0972399887602	55 / 3
Estradiol 17-beta-dehydrogenase 1	HSD17B1	P14061	CHEMBL3181	Enzyme	0.0972399887602	46 / 4
Beta amyloid A4 protein	APP	P05067	CHEMBL2487	Membrane receptor	0.0972399887602	33 / 13
Inhibitor of nuclear factor kappa B kinase beta subunit	IKBKB	O14920	CHEMBL1991	Kinase	0.0972399887602	106 / 1
Cytochrome P450 1A1	CYP1A1	P04798	CHEMBL2231	Cytochrome P450	0.0972399887602	14 / 7
Carbonic anhydrase II	CA2	P00918	CHEMBL205	Lyase	0.0972399887602	488 / 18
NADPH oxidase 4	NOX4	Q9NPH5	CHEMBL1250375	Enzyme	0.0972399887602	16 / 7
Poly [ADP-ribose] polymerase-1	PARP1	P09874	CHEMBL3105	Enzyme	0.0972399887602	362 / 9
Carbonic anhydrase XII	CA12	O43570	CHEMBL3242	Lyase	0.0972399887602	265 / 21
Epidermal growth factor receptor erbB1	EGFR	P00533	CHEMBL203	Kinase	0.0972399887602	590 / 29
Multidrug resistance-associated protein 1	ABCC1	P33527	CHEMBL3004	Primary active transporter	0.0972399887602	18 / 11
Carbonic anhydrase VII	CA7	P43166	CHEMBL2326	Lyase	0.0972399887602	74 / 18
Cytochrome P450 1A2	CYP1A2	P05177	CHEMBL3356	Cytochrome P450	0.0972399887602	4 / 8
Glycogen synthase kinase-3 beta	GSK3B	P49841	CHEMBL262	Kinase	0.0972399887602	468 / 5
Vascular endothelial growth factor receptor 2	KDR	P35968	CHEMBL279	Kinase	0.0972399887602	848 / 3
ALK tyrosine kinase receptor	ALK	Q9UM73	CHEMBL4247	Kinase	0.0972399887602	100 / 4
Serine/threonine-protein kinase PLK1	PLK1	P53350	CHEMBL3024	Kinase	0.0972399887602	146 / 3
Androgen Receptor	AR	P10275	CHEMBL1871	Nuclear receptor	0.0972399887602	86 / 16
Hepatocyte growth factor receptor	MET	P08581	CHEMBL3717	Kinase	0.0972399887602	633 / 4
Monoamine oxidase A	MAOA	P21397	CHEMBL1951	Oxidoreductase	0.0972399887602	108 / 17
Cyclin-dependent kinase 5/CDK5 activator 1	CDK5R1 CDK5	Q15078 Q00535	CHEMBL1907600	Kinase	0.0972399887602	191 / 18
Serine/threonine-protein kinase Aurora-B	AURKB	Q96GD4	CHEMBL2185	Kinase	0.0972399887602	309 / 4
Receptor-type tyrosine-protein phosphatase S	PTPRS	Q13332	CHEMBL2396508	Phosphatase	0.0972399887602	0 / 8
Ornithine decarboxylase	ODC1	P11926	CHEMBL1869	Lyase	0.0972399887602	2 / 1
Insulin-like growth factor I receptor	IGF1R	P08069	CHEMBL1957	Kinase	0.0972399887602	270 / 3
Insulin receptor	INSR	P06213	CHEMBL1981	Kinase	0.0972399887602	86 / 1
Carbonic anhydrase IV	CA4	P22748	CHEMBL3729	Lyase	0.0972399887602	20 / 13
Cyclin-dependent kinase 1/cyclin B	CCNB3 CDK1 CCNB1 CCNB2	Q8WWL7 P06493 P14635 O95067	CHEMBL2094127	Other cytosolic protein	0.0972399887602	69 / 6
Acetylcholinesterase	ACHE	P22303	CHEMBL220	Hydrolase	0.0972399887602	133 / 35
PI3-kinase p110-gamma subunit	PIK3CG	P48736	CHEMBL3267	Enzyme	0.0972399887602	305 / 1
Casein kinase II alpha	CSNK2A1	P68400	CHEMBL3629	Kinase	0.0972399887602	54 / 2
Carbonic anhydrase I	CA1	P00915	CHEMBL261	Lyase	0.0972399887602	435 / 11
Carbonic anhydrase IX	CA9	Q16790	CHEMBL3594	Lyase	0.0972399887602	273 / 9
Dopamine D4 receptor	DRD4	P21917	CHEMBL219	Family A G protein-coupled receptor	0.0972399887602	148 / 1
Matrix metalloproteinase 13	MMP13	P45452	CHEMBL280	Protease	0.0972399887602	288 / 1
Lymphocyte differentiation antigen CD38	CD38	P28907	CHEMBL4660	Enzyme	0.0972399887602	21 / 2
AMY1C	AMY1A	P04745	CHEMBL2478	Enzyme	0.0972399887602	0 / 1
Carbonic anhydrase VI	CA6	P23280	CHEMBL3025	Lyase	0.0972399887602	38 / 1
Carbonic anhydrase XIII	CA13	Q8N1Q1	CHEMBL3912	Lyase	0.0972399887602	52 / 5
Beta-secretase 1	BACE1	P56817	CHEMBL4822	Protease	0.0972399887602	316 / 15
Plasminogen	PLG	P00747	CHEMBL1801	Protease	0.0972399887602	1 / 2
G-protein coupled receptor 35	GPR35	Q9HC97	CHEMBL1293267	Family A G protein-coupled receptor	0.0972399887602	1 / 4
Serine/threonine-protein kinase AKT	AKT1	P31749	CHEMBL4282	Kinase	0.0972399887602	44 / 4
Tyrosine-protein kinase SRC	SRC	P12931	CHEMBL267	Kinase	0.0972399887602	274 / 10
Cyclin-dependent kinase 1	CDK1	P06493	CHEMBL308	Kinase	0.0972399887602	138 / 10
Focal adhesion kinase 1	PTK2	Q05397	CHEMBL2695	Kinase	0.0972399887602	148 / 2
Estrogen receptor alpha	ESR1	P03372	CHEMBL206	Nuclear receptor	0.0972399887602	49 / 20
Dual specificity protein kinase TTK	TTK	P33981	CHEMBL3983	Kinase	0.0972399887602	92 / 0
Transthyretin	TTR	P02766	CHEMBL3194	Secreted protein	0.0972399887602	5 / 3
Matrix metalloproteinase 2	MMP2	P08253	CHEMBL333	Protease	0.0972399887602	349 / 2
Cystic fibrosis transmembrane conductance regulator	CFTR	P13569	CHEMBL4051	Other ion channel	0.0972399887602	46 / 1
Tyrosine-protein kinase receptor UFO	AXL	P30530	CHEMBL4895	Kinase	0.0972399887602	16 / 4
DNA-3-methyladenine glycosylase	MPG	P29372	CHEMBL3396943	Enzyme	0.0972399887602	0 / 1
Thrombin	F2	P00734	CHEMBL204	Protease	0.0972399887602	174 / 2
Arachidonate 12-lipoxygenase	ALOX12	P18054	CHEMBL3687	Enzyme	0.0972399887602	0 / 8
Estrogen receptor beta	ESR2	Q92731	CHEMBL242	Nuclear receptor	0.0972399887602	42 / 21
Serine/threonine-protein kinase NEK2	NEK2	P51955	CHEMBL3835	Kinase	0.0972399887602	9 / 2
Xanthine dehydrogenase	XDH	P47989	CHEMBL1929	Oxidoreductase	0.0972399887602	5 / 21
Matrix metalloproteinase 9	MMP9	P14780	CHEMBL321	Protease	0.0972399887602	351 / 2
Cyclin-dependent kinase 2	CDK2	P24941	CHEMBL301	Kinase	0.0972399887602	326 / 9
Butyrylcholinesterase	BCHE	P06276	CHEMBL1914	Hydrolase	0.0972399887602	65 / 4
Glyoxalase I	GLO1	Q04760	CHEMBL2424	Enzyme	0.0972399887602	0 / 4
DNA topoisomerase I (by homology)	TOP1	P11387	CHEMBL1781	Isomerase	0.0972399887602	0 / 1
Arginase-1 (by homology)	ARG1	P05089	CHEMBL1075097	Enzyme	0.0972399887602	0 / 2
DNA-(apurinic or apyrimidinic site) lyase	APEX1	P27695	CHEMBL5619	Enzyme	0.0972399887602	0 / 1
Aldo-keto reductase family 1 member C1 (by homology)	AKR1C1	Q04828	CHEMBL5905	Enzyme	0.0972399887602	0 / 1
Aldo-keto reductase family 1 member C4 (by homology)	AKR1C4	P17516	CHEMBL4999	Enzyme	0.0972399887602	0 / 1
Tyrosine-protein kinase ITK/TSK	ITK	Q08881	CHEMBL2959	Kinase	0.0972399887602	194 / 0
Tyrosine-protein kinase LCK	LCK	P06239	CHEMBL258	Kinase	0.0972399887602	161 / 3
PI3-kinase p110-alpha subunit	PIK3CA	P42336	CHEMBL4005	Enzyme	0.0972399887602	759 / 0
c-Jun N-terminal kinase 2	MAPK9	P45984	CHEMBL4179	Kinase	0.0972399887602	108 / 0
Carbonyl reductase [NADPH] 1	CBR1	P16152	CHEMBL5586	Enzyme	0.0972399887602	0 / 2
Aldo-keto reductase family 1 member B10	AKR1B10	O60218	CHEMBL5983	Enzyme	0.0972399887602	17 / 3
Matrix metalloproteinase 3	MMP3	P08254	CHEMBL283	Protease	0.0972399887602	186 / 1
Monoamine oxidase B	MAOB	P27338	CHEMBL2039	Oxidoreductase	0.0972399887602	237 / 15
Cyclin-dependent kinase 6	CDK6	Q00534	CHEMBL2508	Kinase	0.0972399887602	11 / 4
CDK2/Cyclin A	CCNA2 CDK2	P20248 P24941	CHEMBL3038469	Kinase	0.0972399887602	43 / 0
Liver glycogen phosphorylase	PYGL	P06737	CHEMBL2568	Enzyme	0.0972399887602	16 / 1
