# Supplementary material for: A Network Pharmacology-Based Study on Irritable Bowel Syndrome Prevention and Treatment Utilizing Shenling Baizhu Powder
Source: Biomed Res Int. 2021 Nov 23;2021:4579850. doi: 10.1155/2021/4579850 (PMC8632384; doi:10.1155/2021/4579850)
Supplement: Supplementary Materials — Please find detailed data in the supplementary file, including the original data of SymMap, metabolomics, and molecular docking of Shenling Baizhu powder. “Shenling Baizhu powder SymMap” includes all herbal targets and combined targets. “Shenling Baizhu powder metabolomics” includes two-dimensional structural data analysis. “Molecular docking” involves molecule-target docking and the results. [file 4579850.f1.zip › Data in brief/2. Shenling Baizhu powder Metabolomics/2D structure/57.csv]

Target	Common name	Uniprot ID	ChEMBL ID	Target Class	Probability*	Known actives (3D/2D)
Integrin alpha-IIb/beta-3	ITGA2B ITGB3	P08514 P05106	CHEMBL2093869	Membrane receptor	0.128898633299	55 / 45
Phospholipase A2 group IIA	PLA2G2A	P14555	CHEMBL3474	Enzyme	0.112748418065	14 / 7
Phospholipase A2 group V	PLA2G5	P39877	CHEMBL4323	Enzyme	0.104671941128	3 / 3
Leucine aminopeptidase	LAP3	P28838	CHEMBL3965	Protease	0.104671941128	0 / 10
Dynamin-1	DNM1	Q05193	CHEMBL4958	Enzyme	0.104671941128	0 / 3
Epoxide hydratase	EPHX2	P34913	CHEMBL2409	Protease	0.104671941128	76 / 61
Aminopeptidase B	RNPEP	Q9H4A4	CHEMBL2432	Protease	0.104671941128	0 / 4
Cannabinoid receptor 1	CNR1	P21554	CHEMBL218	Family A G protein-coupled receptor	0.104671941128	29 / 45
Bile acid receptor FXR	NR1H4	Q96RI1	CHEMBL2047	Nuclear receptor	0.104671941128	58 / 1
Prostaglandin E synthase	PTGES	O14684	CHEMBL5658	Enzyme	0.104671941128	102 / 0
Aspartyl aminopeptidase	DNPEP	Q9ULA0	CHEMBL2761	Protease	0.104671941128	0 / 3
Epoxide hydrolase 1	EPHX1	P07099	CHEMBL1968	Protease	0.104671941128	7 / 29
Peroxisome proliferator-activated receptor delta	PPARD	Q03181	CHEMBL3979	Nuclear receptor	0.104671941128	199 / 0
Presenilin 1	PSEN1	P49768	CHEMBL2473	Other ion channel	0.104671941128	9 / 0
Cytosolic phospholipase A2	PLA2G4A	P47712	CHEMBL3816	Enzyme	0.104671941128	122 / 1
PI4-kinase beta subunit	PI4KB	Q9UBF8	CHEMBL3268	Enzyme	0.104671941128	1 / 0
PI4-kinase alpha subunit	PI4KA	P42356	CHEMBL3667	Enzyme	0.104671941128	1 / 0
Thromboxane-A synthase	TBXAS1	P24557	CHEMBL1835	Cytochrome P450	0.104671941128	187 / 0
Thromboxane A2 receptor	TBXA2R	P21731	CHEMBL2069	Family A G protein-coupled receptor	0.104671941128	219 / 0
G protein-coupled receptor 44	PTGDR2	Q9Y5Y4	CHEMBL5071	Family A G protein-coupled receptor	0.104671941128	519 / 0
Cannabinoid receptor 2	CNR2	P34972	CHEMBL253	Family A G protein-coupled receptor	0.104671941128	38 / 16
Glucagon receptor	GCGR	P47871	CHEMBL1985	Family B G protein-coupled receptor	0.104671941128	139 / 0
Gastric inhibitory polypeptide receptor	GIPR	P48546	CHEMBL4383	Family B G protein-coupled receptor	0.104671941128	19 / 0
Peroxisome proliferator-activated receptor gamma	PPARG	P37231	CHEMBL235	Nuclear receptor	0.104671941128	947 / 0
Dual specificity phosphatase Cdc25C	CDC25C	P30307	CHEMBL2378	Phosphatase	0.104671941128	5 / 0
Dual specificity phosphatase Cdc25A	CDC25A	P30304	CHEMBL3775	Phosphatase	0.104671941128	18 / 0
Dual specificity phosphatase Cdc25B	CDC25B	P30305	CHEMBL4804	Phosphatase	0.104671941128	20 / 0
Methionine aminopeptidase 1	METAP1	P53582	CHEMBL2474	Protease	0.104671941128	0 / 1
Carnitine O-palmitoyltransferase 1, muscle isoform (by homology)	CPT1B	Q92523	CHEMBL2216739	Group translocator	0.104671941128	54 / 0
Neuronal acetylcholine receptor; alpha4/beta2	CHRNA4 CHRNB2	P43681 P17787	CHEMBL1907589	Ligand-gated ion channel	0.104671941128	0 / 44
Neuronal acetylcholine receptor; alpha3/beta4	CHRNA3 CHRNB4	P32297 P30926	CHEMBL1907594	Ligand-gated ion channel	0.104671941128	0 / 30
Neuronal acetylcholine receptor protein alpha-7 subunit	CHRNA7	P36544	CHEMBL2492	Ligand-gated ion channel	0.104671941128	0 / 25
Purinergic receptor P2Y12	P2RY12	Q9H244	CHEMBL2001	Family A G protein-coupled receptor	0.104671941128	343 / 0
Cholecystokinin B receptor (by homology)	CCKBR	P32239	CHEMBL298	Family A G protein-coupled receptor	0.104671941128	423 / 0
5-lipoxygenase activating protein	ALOX5AP	P20292	CHEMBL4550	Other cytosolic protein	0.104671941128	350 / 0
11-beta-hydroxysteroid dehydrogenase 1	HSD11B1	P28845	CHEMBL4235	Enzyme	0.104671941128	37 / 51
Free fatty acid receptor 1	FFAR1	O14842	CHEMBL4422	Family A G protein-coupled receptor	0.104671941128	65 / 0
Leukotriene B4 receptor 1	LTB4R	Q15722	CHEMBL3911	Family A G protein-coupled receptor	0.104671941128	109 / 0
Isoprenylcysteine carboxyl methyltransferase	ICMT	O60725	CHEMBL4699	Enzyme	0.104671941128	6 / 0
Prostanoid DP receptor	PTGDR	Q13258	CHEMBL4427	Family A G protein-coupled receptor	0.104671941128	190 / 0
Cysteinyl leukotriene receptor 1	CYSLTR1	Q9Y271	CHEMBL1798	Family A G protein-coupled receptor	0.104671941128	57 / 0
Cysteinyl leukotriene receptor 2	CYSLTR2	Q9NS75	CHEMBL4330	Family A G protein-coupled receptor	0.104671941128	31 / 0
Neprilysin	MME	P08473	CHEMBL1944	Protease	0.104671941128	61 / 53
Matrix metalloproteinase 12	MMP12	P39900	CHEMBL4393	Protease	0.104671941128	133 / 0
Glucagon	GCG	P01275	CHEMBL5736	Unclassified protein	0.104671941128	37 / 0
p53-binding protein Mdm-2	MDM2	Q00987	CHEMBL5023	Other nuclear protein	0.104671941128	143 / 0
Multidrug resistance-associated protein 1	ABCC1	P33527	CHEMBL3004	Primary active transporter	0.104671941128	3 / 0
Transient receptor potential cation channel subfamily M member 8	TRPM8	Q7Z2W7	CHEMBL1075319	Voltage-gated ion channel	0.104671941128	64 / 0
Diacylglycerol O-acyltransferase 1	DGAT1	O75907	CHEMBL6009	Enzyme	0.104671941128	158 / 0
Dipeptidyl peptidase IV	DPP4	P27487	CHEMBL284	Protease	0.104671941128	0 / 269
Ubiquitin carboxyl-terminal hydrolase 1	USP1	O94782	CHEMBL1795087	Enzyme	0.104671941128	1 / 0
Type-1 angiotensin II receptor (by homology)	AGTR1	P30556	CHEMBL227	Family A G protein-coupled receptor	0.104671941128	148 / 0
Oxytocin receptor (by homology)	OXTR	P30559	CHEMBL2049	Family A G protein-coupled receptor	0.104671941128	11 / 0
Integrin alpha-4/beta-1	ITGB1 ITGA4	P05556 P13612	CHEMBL1907599	Membrane receptor	0.104671941128	377 / 0
Group X secretory phospholipase A2	PLA2G10	O15496	CHEMBL4342	Enzyme	0.104671941128	7 / 2
Formyl peptide receptor 1	FPR1	P21462	CHEMBL3359	Family A G protein-coupled receptor	0.104671941128	18 / 0
Signal transducer and activator of transcription 3 (by homology)	STAT3	P40763	CHEMBL4026	Transcription factor	0.104671941128	39 / 0
Vasopressin V2 receptor (by homology)	AVPR2	P30518	CHEMBL1790	Family A G protein-coupled receptor	0.104671941128	15 / 0
Retinoid X receptor alpha	RXRA	P19793	CHEMBL2061	Nuclear receptor	0.104671941128	137 / 0
Endothelin receptor ET-A	EDNRA	P25101	CHEMBL252	Family A G protein-coupled receptor	0.104671941128	139 / 0
Phosphodiesterase 4B	PDE4B	Q07343	CHEMBL275	Phosphodiesterase	0.104671941128	59 / 0
Phosphodiesterase 4D	PDE4D	Q08499	CHEMBL288	Phosphodiesterase	0.104671941128	50 / 0
Muscle glycogen synthase	GYS1	P13807	CHEMBL4000	Enzyme	0.104671941128	10 / 0
Protein kinase C alpha	PRKCA	P17252	CHEMBL299	Kinase	0.104671941128	0 / 5
Estradiol 17-beta-dehydrogenase 3	HSD17B3	P37058	CHEMBL4234	Enzyme	0.104671941128	0 / 4
Cholecystokinin A receptor	CCKAR	P32238	CHEMBL1901	Family A G protein-coupled receptor	0.104671941128	59 / 0
Vitamin D receptor	VDR	P11473	CHEMBL1977	Nuclear receptor	0.104671941128	8 / 0
Caspase-3	CASP3	P42574	CHEMBL2334	Protease	0.104671941128	96 / 0
Acyl coenzyme A:cholesterol acyltransferase 1	SOAT1	P35610	CHEMBL2782	Enzyme	0.104671941128	5 / 0
Acetyl-CoA carboxylase 1	ACACA	Q13085	CHEMBL3351	Enzyme	0.104671941128	1 / 0
Acetyl-CoA carboxylase 2	ACACB	O00763	CHEMBL4829	Ligase	0.104671941128	2 / 0
Liver glycogen phosphorylase	PYGL	P06737	CHEMBL2568	Enzyme	0.104671941128	79 / 0
Indoleamine 2,3-dioxygenase	IDO1	P14902	CHEMBL4685	Enzyme	0.104671941128	1 / 0
Phospholipase A2 group IIC	PLA2G2C	Q5R387	CHEMBL2097	Enzyme	0.104671941128	1 / 1
Group IID secretory phospholipase A2	PLA2G2D	Q9UNK4	CHEMBL4281	Enzyme	0.104671941128	3 / 0
Protein-tyrosine phosphatase 2C	PTPN11	Q06124	CHEMBL3864	Phosphatase	0.104671941128	35 / 0
Matrix metalloproteinase 10	MMP10	P09238	CHEMBL4270	Protease	0.104671941128	33 / 0
Glucagon-like peptide 1 receptor	GLP1R	P43220	CHEMBL1784	Family B G protein-coupled receptor	0.104671941128	7 / 0
ADAMTS5	ADAMTS5	Q9UNA0	CHEMBL2285	Protease	0.104671941128	12 / 0
ADAMTS4	ADAMTS4	O75173	CHEMBL2318	Protease	0.104671941128	56 / 0
MAP kinase p38 alpha	MAPK14	Q16539	CHEMBL260	Kinase	0.104671941128	25 / 0
c-Jun N-terminal kinase 3	MAPK10	P53779	CHEMBL2637	Kinase	0.104671941128	7 / 0
Sphingosine 1-phosphate receptor Edg-1	S1PR1	P21453	CHEMBL4333	Family A G protein-coupled receptor	0.104671941128	14 / 0
Polyamine oxidase	PAOX	Q6QHF9	CHEMBL2105	Enzyme	0.104671941128	0 / 5
Thymidylate synthase	TYMS	P04818	CHEMBL1952	Transferase	0.104671941128	15 / 0
Sodium channel protein type IX alpha subunit	SCN9A	Q15858	CHEMBL4296	Voltage-gated ion channel	0.104671941128	4 / 0
Acyl coenzyme A:cholesterol acyltransferase 2	SOAT2	O75908	CHEMBL4465	Enzyme	0.104671941128	2 / 0
N-acylsphingosine-amidohydrolase (by homology)	NAAA	Q02083	CHEMBL4349	Enzyme	0.104671941128	0 / 5
Tyrosine-protein kinase SRC	SRC	P12931	CHEMBL267	Kinase	0.104671941128	23 / 0
Integrin alpha-4	ITGA4	P13612	CHEMBL278	Membrane receptor	0.104671941128	83 / 0
Phospholipase A2 group 1VB	PLA2G4B	P0C869	CHEMBL4136	Enzyme	0.104671941128	24 / 0
Angiotensin-converting enzyme	ACE	P12821	CHEMBL1808	Protease	0.104671941128	88 / 86
Nuclear receptor ROR-gamma	RORC	P51449	CHEMBL1741186	Nuclear receptor	0.104671941128	5 / 0
Integrin alpha-4/beta-7	ITGB7 ITGA4	P26010 P13612	CHEMBL2095184	Membrane receptor	0.104671941128	64 / 0
Low molecular weight phosphotyrosine protein phosphatase	ACP1	P24666	CHEMBL4903	Phosphatase	0.104671941128	11 / 0
Peroxisome proliferator-activated receptor alpha	PPARA	Q07869	CHEMBL239	Nuclear receptor	0.104671941128	507 / 1
Steroid 5-alpha-reductase 2	SRD5A2	P31213	CHEMBL1856	Oxidoreductase	0.104671941128	10 / 26
Calcitonin gene-related peptide type 1 receptor	CALCRL	Q16602	CHEMBL3798	Family B G protein-coupled receptor	0.104671941128	3 / 0
Metabotropic glutamate receptor 2	GRM2	Q14416	CHEMBL5137	Family C G protein-coupled receptor	0.104671941128	29 / 1
HLA class I histocompatibility antigen A-3	HLA-A	P04439	CHEMBL2632	Surface antigen	0.104671941128	0 / 25
