# Supplementary material for: A Network Pharmacology-Based Study on Irritable Bowel Syndrome Prevention and Treatment Utilizing Shenling Baizhu Powder
Source: Biomed Res Int. 2021 Nov 23;2021:4579850. doi: 10.1155/2021/4579850 (PMC8632384; doi:10.1155/2021/4579850)
Supplement: Supplementary Materials — Please find detailed data in the supplementary file, including the original data of SymMap, metabolomics, and molecular docking of Shenling Baizhu powder. “Shenling Baizhu powder SymMap” includes all herbal targets and combined targets. “Shenling Baizhu powder metabolomics” includes two-dimensional structural data analysis. “Molecular docking” involves molecule-target docking and the results. [file 4579850.f1.zip › Data in brief/2. Shenling Baizhu powder Metabolomics/2D structure/58.csv]

Target	Common name	Uniprot ID	ChEMBL ID	Target Class	Probability*	Known actives (3D/2D)
Aldose reductase	AKR1B1	P15121	CHEMBL1900	Enzyme	0.733130009664	15 / 24
Aldo-keto reductase family 1 member B10	AKR1B10	O60218	CHEMBL5983	Enzyme	0.398556533647	2 / 18
Matrix metalloproteinase 13	MMP13	P45452	CHEMBL280	Protease	0.206040716221	0 / 3
Matrix metalloproteinase 2	MMP2	P08253	CHEMBL333	Protease	0.206040716221	0 / 6
Beta amyloid A4 protein	APP	P05067	CHEMBL2487	Membrane receptor	0.105608279572	2 / 18
Matrix metalloproteinase 12	MMP12	P39900	CHEMBL4393	Protease	0.105608279572	1 / 5
Leukocyte elastase	ELANE	P08246	CHEMBL248	Protease	0.105608279572	0 / 2
Glucose-6-phosphate translocase	SLC37A4	O43826	CHEMBL3217398	Electrochemical transporter	0.0972399887602	0 / 2
Phosphodiesterase 4D	PDE4D	Q08499	CHEMBL288	Phosphodiesterase	0.0972399887602	0 / 2
Phosphodiesterase 9A	PDE9A	O76083	CHEMBL3535	Phosphodiesterase	0.0972399887602	0 / 1
Phosphodiesterase 1B	PDE1B	Q01064	CHEMBL4425	Phosphodiesterase	0.0972399887602	0 / 1
Protein kinase C delta (by homology)	PRKCD	Q05655	CHEMBL2996	Kinase	0.0972399887602	0 / 35
Protein kinase C alpha	PRKCA	P17252	CHEMBL299	Kinase	0.0972399887602	0 / 198
Beta-secretase 1	BACE1	P56817	CHEMBL4822	Protease	0.0972399887602	0 / 5
Hematopoietic cell protein-tyrosine phosphatase 70Z-PEP	PTPN22	Q9Y2R2	CHEMBL2889	Phosphatase	0.0972399887602	6 / 0
Monoglyceride lipase	MGLL	Q99685	CHEMBL4191	Enzyme	0.0972399887602	0 / 2
Carbonic anhydrase II	CA2	P00918	CHEMBL205	Lyase	0.0972399887602	46 / 24
Carbonic anhydrase I	CA1	P00915	CHEMBL261	Lyase	0.0972399887602	34 / 32
Carbonic anhydrase XII	CA12	O43570	CHEMBL3242	Lyase	0.0972399887602	6 / 32
Carbonic anhydrase IX	CA9	Q16790	CHEMBL3594	Lyase	0.0972399887602	6 / 36
P-glycoprotein 1	ABCB1	P08183	CHEMBL4302	Primary active transporter	0.0972399887602	0 / 55
Liver glycogen phosphorylase	PYGL	P06737	CHEMBL2568	Enzyme	0.0972399887602	16 / 1
Sialidase 4	NEU4	Q8WWR8	CHEMBL4174	Enzyme	0.0972399887602	4 / 0
Carbonic anhydrase VII	CA7	P43166	CHEMBL2326	Lyase	0.0	0 / 23
Carbonic anhydrase VI	CA6	P23280	CHEMBL3025	Lyase	0.0	0 / 16
Carbonic anhydrase XIII	CA13	Q8N1Q1	CHEMBL3912	Lyase	0.0	0 / 14
Carbonic anhydrase VB	CA5B	Q9Y2D0	CHEMBL3969	Lyase	0.0	0 / 14
Carbonic anhydrase VA	CA5A	P35218	CHEMBL4789	Lyase	0.0	0 / 19
DNA polymerase beta	POLB	P06746	CHEMBL2392	Enzyme	0.0	3 / 3
Matrix metalloproteinase 9	MMP9	P14780	CHEMBL321	Protease	0.0	0 / 4
Receptor protein-tyrosine kinase erbB-2	ERBB2	P04626	CHEMBL1824	Kinase	0.0	0 / 1
Epidermal growth factor receptor erbB1	EGFR	P00533	CHEMBL203	Kinase	0.0	0 / 4
Cyclooxygenase-1	PTGS1	P23219	CHEMBL221	Oxidoreductase	0.0	0 / 1
Norepinephrine transporter	SLC6A2	P23975	CHEMBL222	Electrochemical transporter	0.0	0 / 3
Tyrosine-protein kinase LCK	LCK	P06239	CHEMBL258	Kinase	0.0	0 / 1
MAP kinase ERK2	MAPK1	P28482	CHEMBL4040	Kinase	0.0	0 / 1
Aldo-keto-reductase family 1 member C3	AKR1C3	P42330	CHEMBL4681	Enzyme	0.0	0 / 17
Aldo-keto reductase family 1 member C4	AKR1C4	P17516	CHEMBL4999	Enzyme	0.0	0 / 1
Aldo-keto reductase family 1 member C2	AKR1C2	P52895	CHEMBL5847	Enzyme	0.0	0 / 1
Tyrosine-protein kinase SRC	SRC	P12931	CHEMBL267	Kinase	0.0	1 / 0
Tyrosyl-tRNA synthetase	YARS	P54577	CHEMBL3179	Enzyme	0.0	12 / 0
Enteropeptidase	TMPRSS15	P98073	CHEMBL1741195	Protease	0.0	5 / 0
Trypsin I	PRSS1	P07477	CHEMBL209	Protease	0.0	5 / 0
Arachidonate 5-lipoxygenase	ALOX5	P09917	CHEMBL215	Oxidoreductase	0.0	0 / 15
Caspase-3	CASP3	P42574	CHEMBL2334	Protease	0.0	16 / 0
Dual specificty protein kinase CLK1	CLK1	P49759	CHEMBL4224	Kinase	0.0	0 / 3
Dual specificity tyrosine-phosphorylation-regulated kinase 1B	DYRK1B	Q9Y463	CHEMBL5543	Kinase	0.0	0 / 7
Angiotensin-converting enzyme (by homology)	ACE	P12821	CHEMBL1808	Protease	0.0	9 / 0
Aminopeptidase A	ENPEP	Q07075	CHEMBL3439	Protease	0.0	19 / 0
Caspase-6	CASP6	P55212	CHEMBL3308	Protease	0.0	5 / 0
Caspase-7	CASP7	P55210	CHEMBL3468	Protease	0.0	5 / 0
Caspase-8	CASP8	Q14790	CHEMBL3776	Protease	0.0	5 / 0
Caspase-1	CASP1	P29466	CHEMBL4801	Protease	0.0	6 / 0
Caspase-2	CASP2	P42575	CHEMBL4884	Protease	0.0	2 / 0
Carbonic anhydrase III	CA3	P07451	CHEMBL2885	Lyase	0.0	0 / 2
Phosphodiesterase 5A	PDE5A	O76074	CHEMBL1827	Phosphodiesterase	0.0	1 / 1
Neprilysin	MME	P08473	CHEMBL1944	Protease	0.0	3 / 0
Sialidase 3	NEU3	Q9UQ49	CHEMBL3046	Enzyme	0.0	3 / 0
Sialidase 2	NEU2	Q9Y3R4	CHEMBL3200	Enzyme	0.0	1 / 0
Purinergic receptor P2Y1	P2RY1	P47900	CHEMBL4315	Family A G protein-coupled receptor	0.0	14 / 0
P-selectin	SELP	P16109	CHEMBL5378	Adhesion	0.0	4 / 0
Insulin-like growth factor I receptor	IGF1R	P08069	CHEMBL1957	Kinase	0.0	2 / 0
Insulin receptor	INSR	P06213	CHEMBL1981	Kinase	0.0	1 / 0
PI3-kinase p110-gamma subunit	PIK3CG	P48736	CHEMBL3267	Enzyme	0.0	1 / 0
Estrogen receptor alpha	ESR1	P03372	CHEMBL206	Nuclear receptor	0.0	2 / 2
Thymidylate synthase	TYMS	P04818	CHEMBL1952	Transferase	0.0	40 / 0
Nuclear receptor subfamily 4 group A member 1	NR4A1	P22736	CHEMBL1293229	Nuclear receptor	0.0	1 / 0
Inhibitor of nuclear factor kappa B kinase beta subunit	IKBKB	O14920	CHEMBL1991	Kinase	0.0	0 / 2
Monoamine oxidase B	MAOB	P27338	CHEMBL2039	Oxidoreductase	0.0	0 / 2
Endothelin receptor ET-A (by homology)	EDNRA	P25101	CHEMBL252	Family A G protein-coupled receptor	0.0	1 / 1
Folylpoly-gamma-glutamate synthetase	FPGS	Q05932	CHEMBL3171	Enzyme	0.0	2 / 0
Dihydrofolate reductase	DHFR	P00374	CHEMBL202	Oxidoreductase	0.0	7 / 0
AMP deaminase 3	AMPD3	Q01432	CHEMBL2912	Enzyme	0.0	3 / 0
Casein kinase II alpha	CSNK2A1	P68400	CHEMBL3629	Kinase	0.0	1 / 0
Casein kinase II alpha (prime)	CSNK2A2	P19784	CHEMBL4070	Kinase	0.0	1 / 0
Aldehyde dehydrogenase	ALDH2	P05091	CHEMBL1935	Oxidoreductase	0.0	2 / 0
Serine/threonine-protein kinase PIM1	PIM1	P11309	CHEMBL2147	Kinase	0.0	13 / 0
Glyoxalase I	GLO1	Q04760	CHEMBL2424	Enzyme	0.0	6 / 0
Glutathione S-transferase Pi	GSTP1	P09211	CHEMBL3902	Enzyme	0.0	2 / 0
Tyrosinase	TYR	P14679	CHEMBL1973	Oxidoreductase	0.0	3 / 0
Integrin alpha-IIb/beta-3	ITGA2B ITGB3	P08514 P05106	CHEMBL2093869	Membrane receptor	0.0	14 / 0
Carbonic anhydrase XIV	CA14	Q9ULX7	CHEMBL3510	Lyase	0.0	4 / 21
NAALADase II	NAALAD2	Q9Y3Q0	CHEMBL2609	Protease	0.0	5 / 0
DNA polymerase alpha subunit	POLA1	P09884	CHEMBL1828	Transferase	0.0	2 / 0
ATP-citrate synthase	ACLY	P53396	CHEMBL3720	Enzyme	0.0	10 / 0
G-protein coupled receptor 35	GPR35	Q9HC97	CHEMBL1293267	Family A G protein-coupled receptor	0.0	1 / 0
Butyrylcholinesterase	BCHE	P06276	CHEMBL1914	Hydrolase	0.0	0 / 2
Thrombin	F2	P00734	CHEMBL204	Protease	0.0	2 / 0
Egl nine homolog 1	EGLN1	Q9GZT9	CHEMBL5697	Oxidoreductase	0.0	1 / 0
Leukocyte adhesion molecule-1	SELL	P14151	CHEMBL3161	Adhesion	0.0	2 / 0
Selectin E	SELE	P16581	CHEMBL3890	Adhesion	0.0	2 / 0
Glutamate carboxypeptidase II	FOLH1	Q04609	CHEMBL1892	Protease	0.0	14 / 0
Dopamine transporter	SLC6A3	Q01959	CHEMBL238	Electrochemical transporter	0.0	0 / 23
Hypoxanthine-guanine phosphoribosyltransferase	HPRT1	P00492	CHEMBL2360	Enzyme	0.0	2 / 0
Galectin-3	LGALS3	P17931	CHEMBL4531	Other cytosolic protein	0.0	2 / 0
Vascular endothelial growth factor receptor 2	KDR	P35968	CHEMBL279	Kinase	0.0	1 / 0
Vascular endothelial growth factor receptor 3	FLT4	P35916	CHEMBL1955	Kinase	0.0	1 / 0
Tyrosine-protein kinase TIE-2	TEK	Q02763	CHEMBL4128	Kinase	0.0	1 / 0
Muscle glycogen phosphorylase	PYGM	P11217	CHEMBL3526	Enzyme	0.0	8 / 0
Toll-like receptor 4 (by homology)	TLR4	O00206	CHEMBL5255	Toll-like and Il-1 receptors	0.0	0 / 8
