# Supplementary material for: A Network Pharmacology-Based Study on Irritable Bowel Syndrome Prevention and Treatment Utilizing Shenling Baizhu Powder
Source: Biomed Res Int. 2021 Nov 23;2021:4579850. doi: 10.1155/2021/4579850 (PMC8632384; doi:10.1155/2021/4579850)
Supplement: Supplementary Materials — Please find detailed data in the supplementary file, including the original data of SymMap, metabolomics, and molecular docking of Shenling Baizhu powder. “Shenling Baizhu powder SymMap” includes all herbal targets and combined targets. “Shenling Baizhu powder metabolomics” includes two-dimensional structural data analysis. “Molecular docking” involves molecule-target docking and the results. [file 4579850.f1.zip › Data in brief/2. Shenling Baizhu powder Metabolomics/2D structure/59.csv]

Target	Common name	Uniprot ID	ChEMBL ID	Target Class	Probability*	Known actives (3D/2D)
Aldose reductase	AKR1B1	P15121	CHEMBL1900	Enzyme	0.71657023515	42 / 24
Aldo-keto reductase family 1 member B10	AKR1B10	O60218	CHEMBL5983	Enzyme	0.71657023515	2 / 18
Matrix metalloproteinase 13	MMP13	P45452	CHEMBL280	Protease	0.147460273963	2 / 3
Matrix metalloproteinase 2	MMP2	P08253	CHEMBL333	Protease	0.147460273963	4 / 6
Beta amyloid A4 protein	APP	P05067	CHEMBL2487	Membrane receptor	0.122339193554	1 / 15
Matrix metalloproteinase 12	MMP12	P39900	CHEMBL4393	Protease	0.105608279572	3 / 6
Glucose-6-phosphate translocase	SLC37A4	O43826	CHEMBL3217398	Electrochemical transporter	0.0972399887602	0 / 2
Liver glycogen phosphorylase	PYGL	P06737	CHEMBL2568	Enzyme	0.0972399887602	24 / 1
Leukocyte elastase	ELANE	P08246	CHEMBL248	Protease	0.0972399887602	0 / 2
Sialidase 4	NEU4	Q8WWR8	CHEMBL4174	Enzyme	0.0972399887602	6 / 0
Protein kinase C delta (by homology)	PRKCD	Q05655	CHEMBL2996	Kinase	0.0972399887602	0 / 43
Protein kinase C alpha	PRKCA	P17252	CHEMBL299	Kinase	0.0972399887602	0 / 221
P-glycoprotein 1	ABCB1	P08183	CHEMBL4302	Primary active transporter	0.0972399887602	0 / 66
Beta-secretase 1	BACE1	P56817	CHEMBL4822	Protease	0.0972399887602	0 / 3
Phosphodiesterase 4D	PDE4D	Q08499	CHEMBL288	Phosphodiesterase	0.0972399887602	0 / 3
Phosphodiesterase 9A	PDE9A	O76083	CHEMBL3535	Phosphodiesterase	0.0972399887602	0 / 1
Phosphodiesterase 1B	PDE1B	Q01064	CHEMBL4425	Phosphodiesterase	0.0972399887602	0 / 1
Endothelin-converting enzyme 1	ECE1	P42892	CHEMBL4791	Protease	0.0972399887602	9 / 0
Endo-beta-N-acetylglucosaminidase	ENGASE	Q8NFI3	CHEMBL5172	Enzyme	0.0972399887602	1 / 0
Carbonic anhydrase II	CA2	P00918	CHEMBL205	Lyase	0.0972399887602	89 / 24
Carbonic anhydrase I	CA1	P00915	CHEMBL261	Lyase	0.0972399887602	66 / 33
Carbonic anhydrase XII	CA12	O43570	CHEMBL3242	Lyase	0.0972399887602	20 / 33
Carbonic anhydrase IX	CA9	Q16790	CHEMBL3594	Lyase	0.0972399887602	20 / 36
Sialidase 3	NEU3	Q9UQ49	CHEMBL3046	Enzyme	0.0972399887602	6 / 0
Sialidase 2	NEU2	Q9Y3R4	CHEMBL3200	Enzyme	0.0972399887602	4 / 0
Glutamate receptor ionotropic kainate 2	GRIK2	Q13002	CHEMBL3683	Ligand-gated ion channel	0.0972399887602	2 / 0
Glutamate receptor ionotropic kainate 3	GRIK3	Q13003	CHEMBL3684	Ligand-gated ion channel	0.0972399887602	1 / 0
Carbonic anhydrase VI	CA6	P23280	CHEMBL3025	Lyase	0.0	0 / 16
Carbonic anhydrase VB	CA5B	Q9Y2D0	CHEMBL3969	Lyase	0.0	0 / 14
Carbonic anhydrase VA	CA5A	P35218	CHEMBL4789	Lyase	0.0	0 / 19
Aminopeptidase A	ENPEP	Q07075	CHEMBL3439	Protease	0.0	27 / 0
Caspase-3	CASP3	P42574	CHEMBL2334	Protease	0.0	22 / 0
AMP deaminase 3	AMPD3	Q01432	CHEMBL2912	Enzyme	0.0	7 / 0
Caspase-6	CASP6	P55212	CHEMBL3308	Protease	0.0	5 / 0
Caspase-7	CASP7	P55210	CHEMBL3468	Protease	0.0	6 / 0
Caspase-8	CASP8	Q14790	CHEMBL3776	Protease	0.0	6 / 0
Caspase-1	CASP1	P29466	CHEMBL4801	Protease	0.0	6 / 0
Caspase-2	CASP2	P42575	CHEMBL4884	Protease	0.0	3 / 0
Matrix metalloproteinase 1	MMP1	P03956	CHEMBL332	Protease	0.0	5 / 12
Matrix metalloproteinase 9	MMP9	P14780	CHEMBL321	Protease	0.0	3 / 5
Angiotensin-converting enzyme (by homology)	ACE	P12821	CHEMBL1808	Protease	0.0	34 / 0
Hematopoietic cell protein-tyrosine phosphatase 70Z-PEP	PTPN22	Q9Y2R2	CHEMBL2889	Phosphatase	0.0	4 / 0
Leukocyte adhesion molecule-1	SELL	P14151	CHEMBL3161	Adhesion	0.0	4 / 0
P-selectin	SELP	P16109	CHEMBL5378	Adhesion	0.0	9 / 0
Tyrosine-protein kinase FYN	FYN	P06241	CHEMBL1841	Kinase	0.0	4 / 2
Transthyretin	TTR	P02766	CHEMBL3194	Secreted protein	0.0	2 / 3
PI3-kinase p110-gamma subunit	PIK3CG	P48736	CHEMBL3267	Enzyme	0.0	3 / 0
Bifunctional protein NCOAT	OGA	O60502	CHEMBL5921	Enzyme	0.0	2 / 0
Neprilysin	MME	P08473	CHEMBL1944	Protease	0.0	25 / 0
Trehalase	TREH	O43280	CHEMBL3087	Enzyme	0.0	1 / 0
Matrix metalloproteinase 16	MMP16	P51512	CHEMBL2200	Protease	0.0	1 / 0
Hypoxanthine-guanine phosphoribosyltransferase	HPRT1	P00492	CHEMBL2360	Enzyme	0.0	3 / 0
Matrix metalloproteinase 14	MMP14	P50281	CHEMBL3869	Protease	0.0	2 / 0
Matrix metalloproteinase 8	MMP8	P22894	CHEMBL4588	Protease	0.0	5 / 0
Insulin-like growth factor I receptor	IGF1R	P08069	CHEMBL1957	Kinase	0.0	1 / 0
Insulin receptor	INSR	P06213	CHEMBL1981	Kinase	0.0	1 / 0
Tyrosyl-tRNA synthetase	YARS	P54577	CHEMBL3179	Enzyme	0.0	14 / 0
Neuropilin-1	NRP1	O14786	CHEMBL5174	Secreted protein	0.0	2 / 0
Glutamate carboxypeptidase II	FOLH1	Q04609	CHEMBL1892	Protease	0.0	27 / 0
Tyrosine-protein kinase SRC	SRC	P12931	CHEMBL267	Kinase	0.0	1 / 0
Hydroxycarboxylic acid receptor 2	HCAR2	Q8TDS4	CHEMBL3785	Family A G protein-coupled receptor	0.0	6 / 0
Monoglyceride lipase	MGLL	Q99685	CHEMBL4191	Enzyme	0.0	0 / 2
G protein-coupled receptor kinase 6	GRK6	P43250	CHEMBL6144	Kinase	0.0	5 / 0
Thymidylate synthase	TYMS	P04818	CHEMBL1952	Transferase	0.0	19 / 0
Vascular endothelial growth factor receptor 2	KDR	P35968	CHEMBL279	Kinase	0.0	2 / 0
Cyclooxygenase-1	PTGS1	P23219	CHEMBL221	Oxidoreductase	0.0	0 / 1
MAP kinase ERK2	MAPK1	P28482	CHEMBL4040	Kinase	0.0	0 / 1
Aldo-keto reductase family 1 member C4	AKR1C4	P17516	CHEMBL4999	Enzyme	0.0	0 / 1
Aldo-keto reductase family 1 member C2	AKR1C2	P52895	CHEMBL5847	Enzyme	0.0	0 / 1
Maltase-glucoamylase	MGAM	O43451	CHEMBL2074	Hydrolase	0.0	10 / 0
Thrombin	F2	P00734	CHEMBL204	Protease	0.0	3 / 0
ADAMTS5	ADAMTS5	Q9UNA0	CHEMBL2285	Protease	0.0	1 / 0
Carbonic anhydrase III	CA3	P07451	CHEMBL2885	Lyase	0.0	0 / 2
Tyrosinase	TYR	P14679	CHEMBL1973	Oxidoreductase	0.0	10 / 0
Insulin-like growth factor binding protein 5	IGFBP5	P24593	CHEMBL2665	Secreted protein	0.0	3 / 0
G-protein coupled receptor 35	GPR35	Q9HC97	CHEMBL1293267	Family A G protein-coupled receptor	0.0	4 / 0
Inhibitor of nuclear factor kappa B kinase beta subunit	IKBKB	O14920	CHEMBL1991	Kinase	0.0	0 / 3
NADPH oxidase 4	NOX4	Q9NPH5	CHEMBL1250375	Enzyme	0.0	1 / 0
Sucrase-isomaltase	SI	P14410	CHEMBL2748	Enzyme	0.0	9 / 0
CaM-kinase kinase beta	CAMKK2	Q96RR4	CHEMBL5284	Kinase	0.0	1 / 0
Aldehyde dehydrogenase	ALDH2	P05091	CHEMBL1935	Oxidoreductase	0.0	2 / 0
Pancreatic alpha-amylase	AMY2A	P04746	CHEMBL2045	Hydrolase	0.0	2 / 0
Selectin E	SELE	P16581	CHEMBL3890	Adhesion	0.0	4 / 0
NAALADase II	NAALAD2	Q9Y3Q0	CHEMBL2609	Protease	0.0	7 / 0
DNA (cytosine-5)-methyltransferase 3B	DNMT3B	Q9UBC3	CHEMBL6095	Reader	0.0	4 / 0
DNA polymerase beta	POLB	P06746	CHEMBL2392	Enzyme	0.0	3 / 4
Histone-lysine N-methyltransferase MLL	KMT2A	Q03164	CHEMBL1293299	Writer	0.0	1 / 0
Histone-lysine N-methyltransferase, H3 lysine-79 specific	DOT1L	Q8TEK3	CHEMBL1795117	Writer	0.0	4 / 0
Histone-lysine N-methyltransferase SUV39H1	SUV39H1	O43463	CHEMBL1795118	Writer	0.0	1 / 0
DNA (cytosine-5)-methyltransferase 1	DNMT1	P26358	CHEMBL1993	Writer	0.0	4 / 0
Indolethylamine N-methyltransferase	INMT	O95050	CHEMBL2131	Enzyme	0.0	1 / 0
N-lysine methyltransferase SMYD2	SMYD2	Q9NRG4	CHEMBL2169716	Writer	0.0	1 / 0
EZH2/SUZ12/EED/RBBP7/RBBP4	EZH2	Q15910	CHEMBL2189110	Writer	0.0	1 / 0
Histone-lysine N-methyltransferase EZH1	EZH1	Q92800	CHEMBL2189116	Writer	0.0	1 / 0
Histone-lysine N-methyltransferase SETDB1	SETDB1	Q15047	CHEMBL2321646	Writer	0.0	1 / 0
Alpha-ketoglutarate-dependent dioxygenase FTO	FTO	Q9C0B1	CHEMBL2331065	Oxidoreductase	0.0	1 / 0
Asparagine synthetase	ASNS	P08243	CHEMBL3120	Enzyme	0.0	1 / 0
ATP-citrate synthase	ACLY	P53396	CHEMBL3720	Enzyme	0.0	11 / 0
Histone-arginine methyltransferase CARM1	CARM1	Q86X55	CHEMBL5406	Writer	0.0	1 / 0
Protein-arginine N-methyltransferase 1	PRMT1	Q99873	CHEMBL5524	Writer	0.0	1 / 0
