# Supplementary material for: A Network Pharmacology-Based Study on Irritable Bowel Syndrome Prevention and Treatment Utilizing Shenling Baizhu Powder
Source: Biomed Res Int. 2021 Nov 23;2021:4579850. doi: 10.1155/2021/4579850 (PMC8632384; doi:10.1155/2021/4579850)
Supplement: Supplementary Materials — Please find detailed data in the supplementary file, including the original data of SymMap, metabolomics, and molecular docking of Shenling Baizhu powder. “Shenling Baizhu powder SymMap” includes all herbal targets and combined targets. “Shenling Baizhu powder metabolomics” includes two-dimensional structural data analysis. “Molecular docking” involves molecule-target docking and the results. [file 4579850.f1.zip › Data in brief/2. Shenling Baizhu powder Metabolomics/2D structure/61.csv]

Target	Common name	Uniprot ID	ChEMBL ID	Target Class	Probability*	Known actives (3D/2D)
Protein-tyrosine phosphatase 1B	PTPN1	P18031	CHEMBL335	Phosphatase	0.109339753231	47 / 39
Neuronal acetylcholine receptor protein alpha-7 subunit	CHRNA7	P36544	CHEMBL2492	Ligand-gated ion channel	0.109339753231	18 / 11
Monoamine oxidase B	MAOB	P27338	CHEMBL2039	Oxidoreductase	0.109339753231	48 / 102
Cyclooxygenase-1	PTGS1	P23219	CHEMBL221	Oxidoreductase	0.109339753231	23 / 17
Cyclooxygenase-2	PTGS2	P35354	CHEMBL230	Oxidoreductase	0.109339753231	46 / 30
Nitric oxide synthase, inducible	NOS2	P35228	CHEMBL4481	Enzyme	0.109339753231	34 / 10
Cytochrome P450 19A1	CYP19A1	P11511	CHEMBL1978	Cytochrome P450	0.109339753231	38 / 37
ATP-binding cassette sub-family G member 2	ABCG2	Q9UNQ0	CHEMBL5393	Primary active transporter	0.109339753231	10 / 53
Beta-secretase 1	BACE1	P56817	CHEMBL4822	Protease	0.109339753231	346 / 30
Bile acid receptor FXR	NR1H4	Q96RI1	CHEMBL2047	Nuclear receptor	0.109339753231	18 / 0
Aldose reductase (by homology)	AKR1B1	P15121	CHEMBL1900	Enzyme	0.109339753231	66 / 40
Arachidonate 5-lipoxygenase	ALOX5	P09917	CHEMBL215	Oxidoreductase	0.109339753231	80 / 30
Cathepsin D	CTSD	P07339	CHEMBL2581	Protease	0.109339753231	11 / 0
Dual specificity phosphatase Cdc25A	CDC25A	P30304	CHEMBL3775	Phosphatase	0.109339753231	9 / 0
3-phosphoinositide dependent protein kinase-1	PDPK1	O15530	CHEMBL2534	Kinase	0.109339753231	9 / 1
P-glycoprotein 1	ABCB1	P08183	CHEMBL4302	Primary active transporter	0.109339753231	22 / 20
Estrogen-related receptor beta	ESRRB	O95718	CHEMBL3751	Nuclear receptor	0.109339753231	8 / 0
Tyrosine-protein kinase ABL	ABL1	P00519	CHEMBL1862	Kinase	0.109339753231	47 / 0
Histone deacetylase 6	HDAC6	Q9UBN7	CHEMBL1865	Eraser	0.109339753231	520 / 0
Histone deacetylase 1	HDAC1	Q13547	CHEMBL325	Eraser	0.109339753231	698 / 0
Protein-tyrosine phosphatase 1C	PTPN6	P29350	CHEMBL3166	Phosphatase	0.109339753231	4 / 0
Protein-tyrosine phosphatase 2C	PTPN11	Q06124	CHEMBL3864	Phosphatase	0.109339753231	4 / 0
Ribosomal protein S6 kinase 1	RPS6KB1	P23443	CHEMBL4501	Kinase	0.109339753231	169 / 0
Histone deacetylase 3	HDAC3	O15379	CHEMBL1829	Eraser	0.109339753231	212 / 0
Tyrosine-protein kinase receptor FLT3	FLT3	P36888	CHEMBL1974	Kinase	0.109339753231	41 / 0
Beta amyloid A4 protein	APP	P05067	CHEMBL2487	Membrane receptor	0.109339753231	37 / 15
Thyroid hormone receptor alpha	THRA	P10827	CHEMBL1860	Nuclear receptor	0.109339753231	13 / 0
Thyroid hormone receptor beta-1	THRB	P10828	CHEMBL1947	Nuclear receptor	0.109339753231	11 / 0
Tubulin beta-1 chain	TUBB1	Q9H4B7	CHEMBL1915	Structural protein	0.109339753231	7 / 16
Epidermal growth factor receptor erbB1	EGFR	P00533	CHEMBL203	Kinase	0.109339753231	112 / 15
Melanin-concentrating hormone receptor 1	MCHR1	Q99705	CHEMBL344	Family A G protein-coupled receptor	0.109339753231	59 / 0
N-acylsphingosine-amidohydrolase	NAAA	Q02083	CHEMBL4349	Enzyme	0.109339753231	2 / 0
Histone deacetylase 3/Nuclear receptor corepressor 2 (HDAC3/NCoR2)	NCOR2 HDAC3	Q9Y618 O15379	CHEMBL2111363	Eraser	0.109339753231	24 / 0
Histone deacetylase 8	HDAC8	Q9BY41	CHEMBL3192	Eraser	0.109339753231	334 / 0
Histone deacetylase 11	HDAC11	Q96DB2	CHEMBL3310	Eraser	0.109339753231	51 / 0
Serine/threonine-protein kinase PIM2	PIM2	Q9P1W9	CHEMBL4523	Kinase	0.109339753231	9 / 0
Histone deacetylase 10	HDAC10	Q969S8	CHEMBL5103	Eraser	0.109339753231	49 / 0
Serine/threonine-protein kinase PIM3	PIM3	Q86V86	CHEMBL5407	Kinase	0.109339753231	4 / 0
Kinesin-1 heavy chain/ Tyrosine-protein kinase receptor RET	RET	P07949	CHEMBL2041	Kinase	0.109339753231	12 / 0
MAP kinase p38 alpha	MAPK14	Q16539	CHEMBL260	Kinase	0.109339753231	86 / 0
Platelet-derived growth factor receptor beta	PDGFRB	P09619	CHEMBL1913	Kinase	0.109339753231	17 / 0
Serine/threonine-protein kinase RAF	RAF1	P04049	CHEMBL1906	Kinase	0.109339753231	36 / 0
Serine/threonine-protein kinase B-raf	BRAF	P15056	CHEMBL5145	Kinase	0.109339753231	69 / 0
Inosine-5'-monophosphate dehydrogenase 1	IMPDH1	P20839	CHEMBL1822	Oxidoreductase	0.109339753231	20 / 0
Histone deacetylase 7	HDAC7	Q8WUI4	CHEMBL2716	Eraser	0.109339753231	38 / 0
Pyruvate dehydrogenase kinase isoform 1	PDK1	Q15118	CHEMBL4766	Kinase	0.109339753231	87 / 0
Histone deacetylase 5	HDAC5	Q9UQL6	CHEMBL2563	Eraser	0.109339753231	31 / 0
Histone deacetylase 4	HDAC4	P56524	CHEMBL3524	Eraser	0.109339753231	50 / 0
Histone deacetylase 9	HDAC9	Q9UKV0	CHEMBL4145	Eraser	0.109339753231	32 / 0
Serotonin 3a (5-HT3a) receptor (by homology)	HTR3A	P46098	CHEMBL1899	Ligand-gated ion channel	0.109339753231	19 / 0
CaM kinase II	CAMK2D	Q13557	CHEMBL2801	Kinase	0.109339753231	5 / 0
Histone deacetylase 3/NCoR1	NCOR1 HDAC3	O75376 O15379	CHEMBL3038484	Eraser	0.109339753231	5 / 0
Phosphodiesterase 10A	PDE10A	Q9Y233	CHEMBL4409	Phosphodiesterase	0.109339753231	29 / 0
Dynamin-1	DNM1	Q05193	CHEMBL4958	Enzyme	0.109339753231	9 / 0
Transient receptor potential cation channel subfamily M member 8	TRPM8	Q7Z2W7	CHEMBL1075319	Voltage-gated ion channel	0.109339753231	8 / 0
Cyclin-dependent kinase 2/cyclin A	CDK2 CCNA1 CCNA2	P24941 P78396 P20248	CHEMBL2094128	Other cytosolic protein	0.109339753231	25 / 0
Taste receptor type 2 member 31	TAS2R31	P59538	CHEMBL2034804	Taste family G protein-coupled receptor	0.109339753231	3 / 0
ADAM17	ADAM17	P78536	CHEMBL3706	Protease	0.109339753231	130 / 0
ADAM10	ADAM10	O14672	CHEMBL5028	Protease	0.109339753231	37 / 0
Serine/threonine-protein kinase/endoribonuclease IRE1	ERN1	O75460	CHEMBL1163101	Enzyme	0.109339753231	22 / 0
Gamma-secretase	PSEN2 PSENEN NCSTN APH1A PSEN1 APH1B	P49810 Q9NZ42 Q92542 Q96BI3 P49768 Q8WW43	CHEMBL2094135	Protease	0.109339753231	15 / 0
ADAMTS5	ADAMTS5	Q9UNA0	CHEMBL2285	Protease	0.109339753231	12 / 0
Matrix metalloproteinase 13	MMP13	P45452	CHEMBL280	Protease	0.109339753231	180 / 0
Matrix metalloproteinase 9	MMP9	P14780	CHEMBL321	Protease	0.109339753231	265 / 0
Matrix metalloproteinase 1	MMP1	P03956	CHEMBL332	Protease	0.109339753231	280 / 0
Serine/threonine-protein kinase Chk1	CHEK1	O14757	CHEMBL4630	Kinase	0.109339753231	64 / 0
CDC7/DBF4 (Cell division cycle 7-related protein kinase/Activator of S phase kinase)	CDC7	O00311	CHEMBL5443	Kinase	0.109339753231	8 / 0
Serine/threonine-protein kinase WEE1	WEE1	P30291	CHEMBL5491	Kinase	0.109339753231	45 / 0
Tyrosine-protein kinase LCK	LCK	P06239	CHEMBL258	Kinase	0.109339753231	39 / 16
Sodium/glucose cotransporter 1	SLC5A1	P13866	CHEMBL4979	Electrochemical transporter	0.0	29 / 0
Telomerase reverse transcriptase	TERT	O14746	CHEMBL2916	Enzyme	0.0	3 / 2
Serine/threonine-protein kinase PLK1	PLK1	P53350	CHEMBL3024	Kinase	0.0	24 / 0
Bone morphogenetic protein 1	BMP1	P13497	CHEMBL3898	Protease	0.0	113 / 0
Matrix metalloproteinase 8	MMP8	P22894	CHEMBL4588	Protease	0.0	128 / 0
p53-binding protein Mdm-2	MDM2	Q00987	CHEMBL5023	Other nuclear protein	0.0	48 / 0
Acetylcholinesterase	ACHE	P22303	CHEMBL220	Hydrolase	0.0	130 / 81
Protein kinase C beta	PRKCB	P05771	CHEMBL3045	Kinase	0.0	10 / 0
PI3-kinase p110-delta subunit	PIK3CD	O00329	CHEMBL3130	Enzyme	0.0	32 / 0
5-lipoxygenase activating protein	ALOX5AP	P20292	CHEMBL4550	Other cytosolic protein	0.0	187 / 0
Serine/threonine-protein kinase ILK-1	ILK	Q13418	CHEMBL5247	Kinase	0.0	2 / 0
Cytochrome P450 11B1	CYP11B1	P15538	CHEMBL1908	Cytochrome P450	0.0	9 / 0
Cytochrome P450 11B2	CYP11B2	P19099	CHEMBL2722	Cytochrome P450	0.0	10 / 0
Type-1 angiotensin II receptor (by homology)	AGTR1	P30556	CHEMBL227	Family A G protein-coupled receptor	0.0	36 / 0
Phosphodiesterase 4B	PDE4B	Q07343	CHEMBL275	Phosphodiesterase	0.0	18 / 0
Matrix metalloproteinase 3	MMP3	P08254	CHEMBL283	Protease	0.0	163 / 0
Matrix metalloproteinase 14	MMP14	P50281	CHEMBL3869	Protease	0.0	39 / 0
Matrix metalloproteinase 7	MMP7	P09237	CHEMBL4073	Protease	0.0	40 / 0
Matrix metalloproteinase 12	MMP12	P39900	CHEMBL4393	Protease	0.0	20 / 0
Signal transducer and activator of transcription 6	STAT6	P42226	CHEMBL5401	Transcription factor	0.0	13 / 0
Butyrylcholinesterase	BCHE	P06276	CHEMBL1914	Hydrolase	0.0	39 / 8
G protein-coupled receptor 44	PTGDR2	Q9Y5Y4	CHEMBL5071	Family A G protein-coupled receptor	0.0	11 / 0
Serotonin 1a (5-HT1a) receptor	HTR1A	P08908	CHEMBL214	Family A G protein-coupled receptor	0.0	214 / 0
Corticotropin releasing factor receptor 1	CRHR1	P34998	CHEMBL1800	Family B G protein-coupled receptor	0.0	19 / 0
Cannabinoid receptor 1	CNR1	P21554	CHEMBL218	Family A G protein-coupled receptor	0.0	21 / 0
Equilibrative nucleoside transporter 1	SLC29A1	Q99808	CHEMBL1997	Electrochemical transporter	0.0	10 / 0
Dipeptidyl peptidase IV	DPP4	P27487	CHEMBL284	Protease	0.0	160 / 0
Prolyl endopeptidase	PREP	P48147	CHEMBL3202	Protease	0.0	5 / 0
Sodium/glucose cotransporter 2	SLC5A2	P31639	CHEMBL3884	Electrochemical transporter	0.0	3 / 0
MAP kinase ERK2	MAPK1	P28482	CHEMBL4040	Kinase	0.0	78 / 0
Dipeptidyl peptidase VIII	DPP8	Q6V1X1	CHEMBL4657	Protease	0.0	20 / 0
