# Supplementary material for: A Network Pharmacology-Based Study on Irritable Bowel Syndrome Prevention and Treatment Utilizing Shenling Baizhu Powder
Source: Biomed Res Int. 2021 Nov 23;2021:4579850. doi: 10.1155/2021/4579850 (PMC8632384; doi:10.1155/2021/4579850)
Supplement: Supplementary Materials — Please find detailed data in the supplementary file, including the original data of SymMap, metabolomics, and molecular docking of Shenling Baizhu powder. “Shenling Baizhu powder SymMap” includes all herbal targets and combined targets. “Shenling Baizhu powder metabolomics” includes two-dimensional structural data analysis. “Molecular docking” involves molecule-target docking and the results. [file 4579850.f1.zip › Data in brief/2. Shenling Baizhu powder Metabolomics/2D structure/62.csv]

Target	Common name	Uniprot ID	ChEMBL ID	Target Class	Probability*	Known actives (3D/2D)
Neuronal acetylcholine receptor protein alpha-7 subunit	CHRNA7	P36544	CHEMBL2492	Ligand-gated ion channel	0.125572121814	11 / 11
Monoamine oxidase B	MAOB	P27338	CHEMBL2039	Oxidoreductase	0.117454607039	49 / 105
Protein-tyrosine phosphatase 1B	PTPN1	P18031	CHEMBL335	Phosphatase	0.109339753231	42 / 33
Arachidonate 5-lipoxygenase	ALOX5	P09917	CHEMBL215	Oxidoreductase	0.109339753231	95 / 27
Cytochrome P450 19A1	CYP19A1	P11511	CHEMBL1978	Cytochrome P450	0.109339753231	30 / 11
ATP-binding cassette sub-family G member 2	ABCG2	Q9UNQ0	CHEMBL5393	Primary active transporter	0.109339753231	21 / 50
Beta amyloid A4 protein	APP	P05067	CHEMBL2487	Membrane receptor	0.109339753231	29 / 16
Nitric oxide synthase, inducible	NOS2	P35228	CHEMBL4481	Enzyme	0.109339753231	43 / 10
Beta-secretase 1	BACE1	P56817	CHEMBL4822	Protease	0.109339753231	224 / 27
Aldose reductase (by homology)	AKR1B1	P15121	CHEMBL1900	Enzyme	0.109339753231	52 / 39
Cyclooxygenase-2	PTGS2	P35354	CHEMBL230	Oxidoreductase	0.109339753231	57 / 20
Histone deacetylase 1	HDAC1	Q13547	CHEMBL325	Eraser	0.109339753231	943 / 0
Ornithine decarboxylase	ODC1	P11926	CHEMBL1869	Lyase	0.109339753231	5 / 10
P-glycoprotein 1	ABCB1	P08183	CHEMBL4302	Primary active transporter	0.109339753231	58 / 19
Coagulation factor VII/tissue factor	F3	P13726	CHEMBL4081	Surface antigen	0.109339753231	8 / 5
Epidermal growth factor receptor erbB1	EGFR	P00533	CHEMBL203	Kinase	0.109339753231	136 / 12
Matrix metalloproteinase 1	MMP1	P03956	CHEMBL332	Protease	0.109339753231	202 / 0
Tubulin beta-1 chain	TUBB1	Q9H4B7	CHEMBL1915	Structural protein	0.109339753231	1 / 16
3-phosphoinositide dependent protein kinase-1	PDPK1	O15530	CHEMBL2534	Kinase	0.109339753231	10 / 1
Cathepsin D	CTSD	P07339	CHEMBL2581	Protease	0.109339753231	15 / 0
Telomerase reverse transcriptase	TERT	O14746	CHEMBL2916	Enzyme	0.109339753231	7 / 2
Histone deacetylase 8	HDAC8	Q9BY41	CHEMBL3192	Eraser	0.109339753231	435 / 0
Histone deacetylase 3	HDAC3	O15379	CHEMBL1829	Eraser	0.109339753231	226 / 0
Histone deacetylase 6	HDAC6	Q9UBN7	CHEMBL1865	Eraser	0.109339753231	579 / 0
Histone deacetylase 11	HDAC11	Q96DB2	CHEMBL3310	Eraser	0.109339753231	72 / 0
Histone deacetylase 10	HDAC10	Q969S8	CHEMBL5103	Eraser	0.109339753231	72 / 0
Voltage-gated potassium channel subunit Kv1.3	KCNA3	P22001	CHEMBL4633	Voltage-gated ion channel	0.109339753231	4 / 10
Cyclooxygenase-1	PTGS1	P23219	CHEMBL221	Oxidoreductase	0.109339753231	26 / 11
Pyruvate dehydrogenase kinase isoform 1	PDK1	Q15118	CHEMBL4766	Kinase	0.109339753231	90 / 0
Matrix metalloproteinase 13	MMP13	P45452	CHEMBL280	Protease	0.109339753231	128 / 0
Matrix metalloproteinase 12	MMP12	P39900	CHEMBL4393	Protease	0.109339753231	17 / 0
Matrix metalloproteinase 8	MMP8	P22894	CHEMBL4588	Protease	0.109339753231	100 / 0
Splicing factor 3B subunit 3	SF3B3	Q15393	CHEMBL1250378	Unclassified protein	0.109339753231	1 / 0
Histone deacetylase 3/Nuclear receptor corepressor 2 (HDAC3/NCoR2)	NCOR2 HDAC3	Q9Y618 O15379	CHEMBL2111363	Eraser	0.109339753231	27 / 0
Histone deacetylase 5	HDAC5	Q9UQL6	CHEMBL2563	Eraser	0.109339753231	59 / 0
MAP kinase p38 alpha	MAPK14	Q16539	CHEMBL260	Kinase	0.109339753231	77 / 0
Histone deacetylase 7	HDAC7	Q8WUI4	CHEMBL2716	Eraser	0.109339753231	58 / 0
Histone deacetylase 3/NCoR1	NCOR1 HDAC3	O75376 O15379	CHEMBL3038484	Eraser	0.109339753231	6 / 0
Histone deacetylase 4	HDAC4	P56524	CHEMBL3524	Eraser	0.109339753231	91 / 0
Histone deacetylase 9	HDAC9	Q9UKV0	CHEMBL4145	Eraser	0.109339753231	61 / 0
Matrix metalloproteinase 3	MMP3	P08254	CHEMBL283	Protease	0.109339753231	118 / 0
Acyl-CoA desaturase	SCD	O00767	CHEMBL5555	Enzyme	0.109339753231	21 / 0
Matrix metalloproteinase 9	MMP9	P14780	CHEMBL321	Protease	0.109339753231	193 / 0
p53-binding protein Mdm-2	MDM2	Q00987	CHEMBL5023	Other nuclear protein	0.109339753231	36 / 0
Bone morphogenetic protein 1	BMP1	P13497	CHEMBL3898	Protease	0.109339753231	80 / 0
ADAMTS5	ADAMTS5	Q9UNA0	CHEMBL2285	Protease	0.109339753231	9 / 0
ADAMTS4	ADAMTS4	O75173	CHEMBL2318	Protease	0.109339753231	8 / 0
Epoxide hydratase	EPHX2	P34913	CHEMBL2409	Protease	0.109339753231	39 / 0
Matrix metalloproteinase 14	MMP14	P50281	CHEMBL3869	Protease	0.109339753231	29 / 0
Sodium/glucose cotransporter 2	SLC5A2	P31639	CHEMBL3884	Electrochemical transporter	0.109339753231	3 / 0
Macrophage-expressed gene 1 protein	MPEG1	Q2M385	CHEMBL3414409	Unclassified protein	0.109339753231	8 / 0
Serine/threonine-protein kinase B-raf	BRAF	P15056	CHEMBL5145	Kinase	0.109339753231	50 / 0
Serine/threonine-protein kinase TNNI3K	TNNI3K	Q59H18	CHEMBL5260	Kinase	0.109339753231	1 / 0
Thromboxane A2 receptor	TBXA2R	P21731	CHEMBL2069	Family A G protein-coupled receptor	0.109339753231	14 / 0
Induced myeloid leukemia cell differentiation protein Mcl-1	MCL1	Q07820	CHEMBL4361	Other cytosolic protein	0.109339753231	9 / 5
Equilibrative nucleoside transporter 1	SLC29A1	Q99808	CHEMBL1997	Electrochemical transporter	0.109339753231	17 / 0
Platelet activating factor receptor	PTAFR	P25105	CHEMBL250	Family A G protein-coupled receptor	0.109339753231	8 / 0
ADAM17	ADAM17	P78536	CHEMBL3706	Protease	0.109339753231	99 / 0
Serotonin 2a (5-HT2a) receptor	HTR2A	P28223	CHEMBL224	Family A G protein-coupled receptor	0.109339753231	295 / 0
Melanin-concentrating hormone receptor 1	MCHR1	Q99705	CHEMBL344	Family A G protein-coupled receptor	0.109339753231	173 / 0
Monoglyceride lipase	MGLL	Q99685	CHEMBL4191	Enzyme	0.109339753231	29 / 0
Monoamine oxidase A	MAOA	P21397	CHEMBL1951	Oxidoreductase	0.109339753231	37 / 33
Tyrosinase	TYR	P14679	CHEMBL1973	Oxidoreductase	0.109339753231	3 / 0
CaM kinase II	CAMK2D	Q13557	CHEMBL2801	Kinase	0.109339753231	7 / 0
Cannabinoid receptor 1	CNR1	P21554	CHEMBL218	Family A G protein-coupled receptor	0.109339753231	25 / 0
Tyrosine-protein kinase SYK	SYK	P43405	CHEMBL2599	Kinase	0.109339753231	21 / 0
Kinesin-1 heavy chain/ Tyrosine-protein kinase receptor RET	RET	P07949	CHEMBL2041	Kinase	0.109339753231	14 / 0
Dopamine D2 receptor	DRD2	P14416	CHEMBL217	Family A G protein-coupled receptor	0.109339753231	701 / 0
Dopamine D4 receptor	DRD4	P21917	CHEMBL219	Family A G protein-coupled receptor	0.109339753231	164 / 0
Dopamine D3 receptor	DRD3	P35462	CHEMBL234	Family A G protein-coupled receptor	0.109339753231	313 / 0
Hematopoietic prostaglandin D synthase	HPGDS	O60760	CHEMBL5879	Transferase	0.109339753231	11 / 0
Tyrosine-protein kinase receptor FLT3	FLT3	P36888	CHEMBL1974	Kinase	0.0	43 / 0
Anandamide amidohydrolase	FAAH	O00519	CHEMBL2243	Enzyme	0.0	104 / 0
MAP kinase-activated protein kinase 2	MAPKAPK2	P49137	CHEMBL2208	Kinase	0.0	25 / 1
Serine/threonine-protein kinase/endoribonuclease IRE1	ERN1	O75460	CHEMBL1163101	Enzyme	0.0	26 / 0
FK506-binding protein 1A	FKBP1A	P62942	CHEMBL1902	Isomerase	0.0	2 / 0
Dopamine D1 receptor	DRD1	P21728	CHEMBL2056	Family A G protein-coupled receptor	0.0	72 / 0
Protein-tyrosine phosphatase 2C	PTPN11	Q06124	CHEMBL3864	Phosphatase	0.0	5 / 0
Protein tyrosine phosphatase receptor type C-associated protein	PTPRCAP	Q14761	CHEMBL4806	Enzyme	0.0	2 / 0
Sphingosine kinase 2	SPHK2	Q9NRA0	CHEMBL3023	Enzyme	0.0	4 / 0
Sphingosine kinase 1	SPHK1	Q9NYA1	CHEMBL4394	Enzyme	0.0	4 / 0
Dynamin-1	DNM1	Q05193	CHEMBL4958	Enzyme	0.0	10 / 0
Platelet-derived growth factor receptor beta	PDGFRB	P09619	CHEMBL1913	Kinase	0.0	20 / 0
Acyl coenzyme A:cholesterol acyltransferase	CES1	P23141	CHEMBL2265	Enzyme	0.0	9 / 0
Dual specificity phosphatase Cdc25A	CDC25A	P30304	CHEMBL3775	Phosphatase	0.0	10 / 0
Sn1-specific diacylglycerol lipase alpha	DAGLA	Q9Y4D2	CHEMBL5545	Enzyme	0.0	5 / 0
Cytochrome P450 11B1	CYP11B1	P15538	CHEMBL1908	Cytochrome P450	0.0	7 / 0
Thrombin	F2	P00734	CHEMBL204	Protease	0.0	463 / 0
Cytochrome P450 11B2	CYP11B2	P19099	CHEMBL2722	Cytochrome P450	0.0	6 / 0
Serine/threonine-protein kinase Chk1	CHEK1	O14757	CHEMBL4630	Kinase	0.0	123 / 0
CDC7/DBF4 (Cell division cycle 7-related protein kinase/Activator of S phase kinase)	CDC7	O00311	CHEMBL5443	Kinase	0.0	9 / 0
Serine/threonine-protein kinase WEE1	WEE1	P30291	CHEMBL5491	Kinase	0.0	48 / 0
Serotonin 1a (5-HT1a) receptor	HTR1A	P08908	CHEMBL214	Family A G protein-coupled receptor	0.0	319 / 0
Muscarinic acetylcholine receptor M3	CHRM3	P20309	CHEMBL245	Family A G protein-coupled receptor	0.0	54 / 0
Protein kinase C beta	PRKCB	P05771	CHEMBL3045	Kinase	0.0	22 / 0
Maternal embryonic leucine zipper kinase	MELK	Q14680	CHEMBL4578	Kinase	0.0	37 / 0
Vanilloid receptor	TRPV1	Q8NER1	CHEMBL4794	Voltage-gated ion channel	0.0	114 / 0
Estrogen-related receptor alpha	ESRRA	P11474	CHEMBL3429	Nuclear receptor	0.0	9 / 0
Estrogen-related receptor beta	ESRRB	O95718	CHEMBL3751	Nuclear receptor	0.0	8 / 0
Phosphodiesterase 5A	PDE5A	O76074	CHEMBL1827	Phosphodiesterase	0.0	31 / 0
