# Supplementary material for: A Network Pharmacology-Based Study on Irritable Bowel Syndrome Prevention and Treatment Utilizing Shenling Baizhu Powder
Source: Biomed Res Int. 2021 Nov 23;2021:4579850. doi: 10.1155/2021/4579850 (PMC8632384; doi:10.1155/2021/4579850)
Supplement: Supplementary Materials — Please find detailed data in the supplementary file, including the original data of SymMap, metabolomics, and molecular docking of Shenling Baizhu powder. “Shenling Baizhu powder SymMap” includes all herbal targets and combined targets. “Shenling Baizhu powder metabolomics” includes two-dimensional structural data analysis. “Molecular docking” involves molecule-target docking and the results. [file 4579850.f1.zip › Data in brief/2. Shenling Baizhu powder Metabolomics/2D structure/63.csv]

Target	Common name	Uniprot ID	ChEMBL ID	Target Class	Probability*	Known actives (3D/2D)
Tyrosyl-DNA phosphodiesterase 1	TDP1	Q9NUW8	CHEMBL1075138	Enzyme	0.105608279572	0 / 2
Adenosine A1 receptor	ADORA1	P30542	CHEMBL226	Family A G protein-coupled receptor	0.0972399887602	8 / 2
Vascular endothelial growth factor receptor 2	KDR	P35968	CHEMBL279	Kinase	0.0972399887602	2 / 0
Epoxide hydratase	EPHX2	P34913	CHEMBL2409	Protease	0.0972399887602	0 / 1
Steroid 5-alpha-reductase 1	SRD5A1	P18405	CHEMBL1787	Oxidoreductase	0.0972399887602	0 / 1
Endo-beta-N-acetylglucosaminidase	ENGASE	Q8NFI3	CHEMBL5172	Enzyme	0.0972399887602	1 / 0
Leukocyte adhesion molecule-1	SELL	P14151	CHEMBL3161	Adhesion	0.0972399887602	2 / 0
Aldose reductase (by homology)	AKR1B1	P15121	CHEMBL1900	Enzyme	0.0972399887602	7 / 9
Bifunctional protein NCOAT	OGA	O60502	CHEMBL5921	Enzyme	0.0972399887602	1 / 0
Maltase-glucoamylase	MGAM	O43451	CHEMBL2074	Hydrolase	0.0972399887602	6 / 0
Hypoxanthine-guanine phosphoribosyltransferase	HPRT1	P00492	CHEMBL2360	Enzyme	0.0	3 / 0
Squalene monooxygenase (by homology)	SQLE	Q14534	CHEMBL3592	Enzyme	0.0	0 / 10
Cytochrome P450 19A1	CYP19A1	P11511	CHEMBL1978	Cytochrome P450	0.0	0 / 1
Thrombin and coagulation factor X	F10	P00742	CHEMBL244	Protease	0.0	0 / 3
Plasminogen activator inhibitor-1	SERPINE1	P05121	CHEMBL3475	Secreted protein	0.0	0 / 9
Beta-secretase 1	BACE1	P56817	CHEMBL4822	Protease	0.0	0 / 3
Caspase-3	CASP3	P42574	CHEMBL2334	Protease	0.0	21 / 0
NAALADase II	NAALAD2	Q9Y3Q0	CHEMBL2609	Protease	0.0	6 / 0
Squalene synthetase	FDFT1	P37268	CHEMBL3338	Enzyme	0.0	47 / 0
Tyrosyl-tRNA synthetase	YARS	P54577	CHEMBL3179	Enzyme	0.0	10 / 0
Sialidase 4	NEU4	Q8WWR8	CHEMBL4174	Enzyme	0.0	6 / 0
Lysosomal alpha-glucosidase	GAA	P10253	CHEMBL2608	Hydrolase	0.0	1 / 0
Liver glycogen phosphorylase	PYGL	P06737	CHEMBL2568	Enzyme	0.0	13 / 0
Muscle glycogen phosphorylase	PYGM	P11217	CHEMBL3526	Enzyme	0.0	5 / 0
Sialidase 3	NEU3	Q9UQ49	CHEMBL3046	Enzyme	0.0	4 / 0
Sialidase 2	NEU2	Q9Y3R4	CHEMBL3200	Enzyme	0.0	4 / 0
Protein-tyrosine phosphatase 1B	PTPN1	P18031	CHEMBL335	Phosphatase	0.0	5 / 6
Low affinity sodium-glucose cotransporter	SLC5A4	Q9NY91	CHEMBL1770047	Electrochemical transporter	0.0	0 / 7
Sodium/glucose cotransporter 2	SLC5A2	P31639	CHEMBL3884	Electrochemical transporter	0.0	0 / 65
6-phosphogluconate dehydrogenase	PGD	P52209	CHEMBL3404	Enzyme	0.0	1 / 0
Hexokinase type II	HK2	P52789	CHEMBL2640	Enzyme	0.0	1 / 0
Hexokinase type I	HK1	P19367	CHEMBL2688	Enzyme	0.0	1 / 0
Folylpoly-gamma-glutamate synthetase	FPGS	Q05932	CHEMBL3171	Enzyme	0.0	2 / 0
Caspase-6	CASP6	P55212	CHEMBL3308	Protease	0.0	5 / 0
Caspase-7	CASP7	P55210	CHEMBL3468	Protease	0.0	6 / 0
Caspase-8	CASP8	Q14790	CHEMBL3776	Protease	0.0	6 / 0
Caspase-1	CASP1	P29466	CHEMBL4801	Protease	0.0	6 / 0
Adenosine A2a receptor (by homology)	ADORA2A	P29274	CHEMBL251	Family A G protein-coupled receptor	0.0	2 / 0
Phospholipase A2 group 1VB	PLA2G4B	P0C869	CHEMBL4136	Enzyme	0.0	0 / 14
Aminopeptidase A	ENPEP	Q07075	CHEMBL3439	Protease	0.0	17 / 0
Asparagine synthetase	ASNS	P08243	CHEMBL3120	Enzyme	0.0	1 / 0
AMY1C	AMY1A	P04745	CHEMBL2478	Enzyme	0.0	2 / 1
Acyl-CoA:dihydroxyacetonephosphateacyltransferase	GNPAT	O15228	CHEMBL4494	Enzyme	0.0	2 / 0
Caspase-2	CASP2	P42575	CHEMBL4884	Protease	0.0	2 / 0
Estrogen receptor alpha	ESR1	P03372	CHEMBL206	Nuclear receptor	0.0	0 / 2
Splicing factor 3B subunit 3	SF3B3	Q15393	CHEMBL1250378	Unclassified protein	0.0	1 / 0
Histone-lysine N-methyltransferase MLL	KMT2A	Q03164	CHEMBL1293299	Writer	0.0	1 / 0
Histone-lysine N-methyltransferase, H3 lysine-79 specific	DOT1L	Q8TEK3	CHEMBL1795117	Writer	0.0	2 / 0
Histone-lysine N-methyltransferase SUV39H1	SUV39H1	O43463	CHEMBL1795118	Writer	0.0	1 / 0
DNA (cytosine-5)-methyltransferase 1	DNMT1	P26358	CHEMBL1993	Writer	0.0	6 / 0
Indolethylamine N-methyltransferase	INMT	O95050	CHEMBL2131	Enzyme	0.0	1 / 0
N-lysine methyltransferase SMYD2	SMYD2	Q9NRG4	CHEMBL2169716	Writer	0.0	1 / 0
EZH2/SUZ12/EED/RBBP7/RBBP4	EZH2	Q15910	CHEMBL2189110	Writer	0.0	1 / 0
Histone-lysine N-methyltransferase EZH1	EZH1	Q92800	CHEMBL2189116	Writer	0.0	1 / 0
Histone-lysine N-methyltransferase SETDB1	SETDB1	Q15047	CHEMBL2321646	Writer	0.0	1 / 0
Proteasome Macropain subunit MB1	PSMB5	P28074	CHEMBL4662	Protease	0.0	1 / 0
Histone-arginine methyltransferase CARM1	CARM1	Q86X55	CHEMBL5406	Writer	0.0	1 / 0
Protein-arginine N-methyltransferase 1	PRMT1	Q99873	CHEMBL5524	Writer	0.0	1 / 0
Histone-lysine N-methyltransferase, H3 lysine-9 specific 5	EHMT1	Q9H9B1	CHEMBL6031	Writer	0.0	1 / 0
Histone-lysine N-methyltransferase, H3 lysine-9 specific 3	EHMT2	Q96KQ7	CHEMBL6032	Writer	0.0	1 / 0
DNA (cytosine-5)-methyltransferase 3B	DNMT3B	Q9UBC3	CHEMBL6095	Reader	0.0	6 / 0
Cyclin-dependent kinase 1	CDK1	P06493	CHEMBL308	Kinase	0.0	1 / 0
PI3-kinase p110-gamma subunit	PIK3CG	P48736	CHEMBL3267	Enzyme	0.0	1 / 0
PI3-kinase p110-alpha subunit	PIK3CA	P42336	CHEMBL4005	Enzyme	0.0	2 / 0
Heat shock protein HSP 90-alpha	HSP90AA1	P07900	CHEMBL3880	Other cytosolic protein	0.0	0 / 6
Neprilysin (by homology)	MME	P08473	CHEMBL1944	Protease	0.0	7 / 0
Purinergic receptor P2Y1	P2RY1	P47900	CHEMBL4315	Family A G protein-coupled receptor	0.0	12 / 0
Leucine aminopeptidase	LAP3	P28838	CHEMBL3965	Protease	0.0	1 / 0
DNA polymerase delta subunit 1	POLD1	P28340	CHEMBL2735	Transferase	0.0	1 / 0
Adenosylhomocysteinase	AHCY	P23526	CHEMBL2664	Enzyme	0.0	5 / 0
Histone-lysine N-methyltransferase SETD7	SETD7	Q8WTS6	CHEMBL5523	Writer	0.0	1 / 0
Sucrase-isomaltase	SI	P14410	CHEMBL2748	Enzyme	0.0	5 / 0
Angiotensin-converting enzyme (by homology)	ACE	P12821	CHEMBL1808	Protease	0.0	16 / 0
Glucosamine--fructose-6-phosphate aminotransferase [isomerizing] 1	GFPT1	Q06210	CHEMBL1909481	Enzyme	0.0	1 / 0
Glutathione reductase	GSR	P00390	CHEMBL2755	Oxidoreductase	0.0	1 / 0
Pancreatic alpha-amylase	AMY2A	P04746	CHEMBL2045	Hydrolase	0.0	2 / 0
Adenosine A3 receptor	ADORA3	P0DMS8	CHEMBL256	Family A G protein-coupled receptor	0.0	1 / 0
Trehalase	TREH	O43280	CHEMBL3087	Enzyme	0.0	1 / 0
Solute carrier family 28 member 3	SLC28A3	Q9HAS3	CHEMBL5707	Electrochemical transporter	0.0	0 / 1
Serine/threonine-protein kinase Aurora-A	AURKA	O14965	CHEMBL4722	Kinase	0.0	3 / 0
ATP-citrate synthase	ACLY	P53396	CHEMBL3720	Enzyme	0.0	8 / 0
Endothelin-converting enzyme 1	ECE1	P42892	CHEMBL4791	Protease	0.0	4 / 0
Dihydrofolate reductase (by homology)	DHFR	P00374	CHEMBL202	Oxidoreductase	0.0	2 / 0
Casein kinase II alpha	CSNK2A1	P68400	CHEMBL3629	Kinase	0.0	1 / 0
Casein kinase II alpha (prime)	CSNK2A2	P19784	CHEMBL4070	Kinase	0.0	1 / 0
Matrix metalloproteinase 16	MMP16	P51512	CHEMBL2200	Protease	0.0	1 / 0
Matrix metalloproteinase 13	MMP13	P45452	CHEMBL280	Protease	0.0	1 / 0
Matrix metalloproteinase 9	MMP9	P14780	CHEMBL321	Protease	0.0	1 / 0
Matrix metalloproteinase 1	MMP1	P03956	CHEMBL332	Protease	0.0	1 / 0
Matrix metalloproteinase 8	MMP8	P22894	CHEMBL4588	Protease	0.0	1 / 0
Egl nine homolog 1	EGLN1	Q9GZT9	CHEMBL5697	Oxidoreductase	0.0	1 / 0
Purine nucleoside phosphorylase	PNP	P00491	CHEMBL4338	Enzyme	0.0	1 / 0
G protein-coupled receptor kinase 6	GRK6	P43250	CHEMBL6144	Kinase	0.0	2 / 0
Protein arginine N-methyltransferase 5	PRMT5	O14744	CHEMBL1795116	Writer	0.0	1 / 0
Nicotinamide N-methyltransferase	NNMT	P40261	CHEMBL2346486	Enzyme	0.0	1 / 0
Protein arginine N-methyltransferase 3	PRMT3	O60678	CHEMBL5891	Writer	0.0	1 / 0
Interleukin-8 receptor B	CXCR2	P25025	CHEMBL2434	Family A G protein-coupled receptor	0.0	1 / 0
Glutathione S-transferase kappa 1	GSTK1	Q9Y2Q3	CHEMBL4491	Enzyme	0.0	1 / 0
Troponin, cardiac muscle	TNNC1 TNNT2 TNNI3	P63316 P45379 P19429	CHEMBL2095202	Unclassified protein	0.0	0 / 3
Tyrosine-protein kinase SRC	SRC	P12931	CHEMBL267	Kinase	0.0	1 / 0
