# Supplementary material for: A Network Pharmacology-Based Study on Irritable Bowel Syndrome Prevention and Treatment Utilizing Shenling Baizhu Powder
Source: Biomed Res Int. 2021 Nov 23;2021:4579850. doi: 10.1155/2021/4579850 (PMC8632384; doi:10.1155/2021/4579850)
Supplement: Supplementary Materials — Please find detailed data in the supplementary file, including the original data of SymMap, metabolomics, and molecular docking of Shenling Baizhu powder. “Shenling Baizhu powder SymMap” includes all herbal targets and combined targets. “Shenling Baizhu powder metabolomics” includes two-dimensional structural data analysis. “Molecular docking” involves molecule-target docking and the results. [file 4579850.f1.zip › Data in brief/2. Shenling Baizhu powder Metabolomics/2D structure/64.csv]

Target	Common name	Uniprot ID	ChEMBL ID	Target Class	Probability*	Known actives (3D/2D)
Phosphodiesterase 4D	PDE4D	Q08499	CHEMBL288	Phosphodiesterase	0.129284219584	0 / 7
Arachidonate 15-lipoxygenase	ALOX15	P16050	CHEMBL2903	Enzyme	0.113285953487	7 / 2
Exportin-1	XPO1	O14980	CHEMBL5661	Unclassified protein	0.113285953487	0 / 2
Endoplasmin	HSP90B1	P14625	CHEMBL1075323	Other membrane protein	0.113285953487	44 / 0
Heat shock protein HSP 90-beta	HSP90AB1	P08238	CHEMBL4303	Other cytosolic protein	0.113285953487	20 / 0
Heat shock protein HSP 90-alpha	HSP90AA1	P07900	CHEMBL3880	Other cytosolic protein	0.113285953487	44 / 0
Protein farnesyltransferase	FNTA FNTB	P49354 P49356	CHEMBL2094108	Enzyme	0.113285953487	1 / 0
Carbonic anhydrase XIII	CA13	Q8N1Q1	CHEMBL3912	Lyase	0.113285953487	0 / 20
C-C chemokine receptor type 4	CCR4	P51679	CHEMBL2414	Family A G protein-coupled receptor	0.113285953487	7 / 0
Steroid 5-alpha-reductase 1	SRD5A1	P18405	CHEMBL1787	Oxidoreductase	0.113285953487	0 / 6
Nuclear factor NF-kappa-B p105 subunit	NFKB1	P19838	CHEMBL3251	Other cytosolic protein	0.113285953487	0 / 1
Estrogen receptor beta	ESR2	Q92731	CHEMBL242	Nuclear receptor	0.113285953487	6 / 50
Egl nine homolog 1	EGLN1	Q9GZT9	CHEMBL5697	Oxidoreductase	0.113285953487	18 / 0
Nitric oxide synthase, inducible (by homology)	NOS2	P35228	CHEMBL4481	Enzyme	0.113285953487	4 / 0
Cystic fibrosis transmembrane conductance regulator	CFTR	P13569	CHEMBL4051	Other ion channel	0.113285953487	1 / 0
Arachidonate 12-lipoxygenase	ALOX12	P18054	CHEMBL3687	Enzyme	0.113285953487	6 / 1
Rho-associated protein kinase 2	ROCK2	O75116	CHEMBL2973	Kinase	0.113285953487	2 / 0
Phosphodiesterase 10A	PDE10A	Q9Y233	CHEMBL4409	Phosphodiesterase	0.113285953487	5 / 0
G-protein coupled receptor 84	GPR84	Q9NQS5	CHEMBL3714079	Family A G protein-coupled receptor	0.113285953487	3 / 0
Glucagon receptor	GCGR	P47871	CHEMBL1985	Family B G protein-coupled receptor	0.113285953487	16 / 0
Mannose-6-phosphate isomerase	MPI	P34949	CHEMBL2758	Isomerase	0.113285953487	1 / 0
Estradiol 17-beta-dehydrogenase 1	HSD17B1	P14061	CHEMBL3181	Enzyme	0.113285953487	3 / 0
Histone acetyltransferase p300	EP300	Q09472	CHEMBL3784	Writer	0.113285953487	1 / 0
Estrogen receptor alpha	ESR1	P03372	CHEMBL206	Nuclear receptor	0.113285953487	8 / 36
NADPH oxidase 4	NOX4	Q9NPH5	CHEMBL1250375	Enzyme	0.113285953487	2 / 0
Isocitrate dehydrogenase [NADP] cytoplasmic	IDH1	O75874	CHEMBL2007625	Enzyme	0.113285953487	4 / 2
Interleukin-8 receptor B	CXCR2	P25025	CHEMBL2434	Family A G protein-coupled receptor	0.113285953487	16 / 0
Urokinase-type plasminogen activator	PLAU	P00749	CHEMBL3286	Protease	0.113285953487	6 / 0
Cyclin-dependent kinase 1	CDK1	P06493	CHEMBL308	Kinase	0.0	13 / 0
Pyruvate dehydrogenase kinase isoform 1	PDK1	Q15118	CHEMBL4766	Kinase	0.0	25 / 0
Apoptosis regulator Bcl-X	BCL2L1	Q07817	CHEMBL4625	Other ion channel	0.0	7 / 0
Apoptosis regulator Bcl-2	BCL2	P10415	CHEMBL4860	Other ion channel	0.0	12 / 0
Carbonyl reductase [NADPH] 1	CBR1	P16152	CHEMBL5586	Enzyme	0.0	1 / 2
Dihydrofolate reductase	DHFR	P00374	CHEMBL202	Oxidoreductase	0.0	1 / 0
Fructose-1,6-bisphosphatase	FBP1	P09467	CHEMBL3975	Enzyme	0.0	2 / 0
Beta amyloid A4 protein	APP	P05067	CHEMBL2487	Membrane receptor	0.0	1 / 0
PI3-kinase p110-alpha subunit	PIK3CA	P42336	CHEMBL4005	Enzyme	0.0	5 / 0
Thrombin and coagulation factor X	F10	P00742	CHEMBL244	Protease	0.0	33 / 0
Alkaline phosphatase, tissue-nonspecific isozyme	ALPL	P05186	CHEMBL5979	Enzyme	0.0	1 / 0
Thrombin	F2	P00734	CHEMBL204	Protease	0.0	16 / 0
Carbonic anhydrase I	CA1	P00915	CHEMBL261	Lyase	0.0	7 / 17
Carbonic anhydrase XII	CA12	O43570	CHEMBL3242	Lyase	0.0	7 / 33
Carbonic anhydrase IX	CA9	Q16790	CHEMBL3594	Lyase	0.0	8 / 49
Fatty acid synthase	FASN	P49327	CHEMBL4158	Transferase	0.0	2 / 3
Induced myeloid leukemia cell differentiation protein Mcl-1	MCL1	Q07820	CHEMBL4361	Other cytosolic protein	0.0	14 / 0
Catechol O-methyltransferase (by homology)	COMT	P21964	CHEMBL2023	Transferase	0.0	9 / 0
Cyclin-dependent kinase 4	CDK4	P11802	CHEMBL331	Kinase	0.0	6 / 0
Carbonic anhydrase VII	CA7	P43166	CHEMBL2326	Lyase	0.0	1 / 23
Inhibitor of nuclear factor kappa B kinase beta subunit	IKBKB	O14920	CHEMBL1991	Kinase	0.0	20 / 0
Dual specificity protein phosphatase 3	DUSP3	P51452	CHEMBL2635	Phosphatase	0.0	2 / 0
Telomerase reverse transcriptase	TERT	O14746	CHEMBL2916	Enzyme	0.0	2 / 0
Serine/threonine-protein kinase Chk2	CHEK2	O96017	CHEMBL2527	Kinase	0.0	45 / 0
Proteasome assembly chaperone 3	PSMG3	Q9BT73	CHEMBL1075137	Unclassified protein	0.0	1 / 0
Serine/threonine-protein kinase AKT	AKT1	P31749	CHEMBL4282	Kinase	0.0	3 / 3
Serine/threonine-protein kinase Chk1	CHEK1	O14757	CHEMBL4630	Kinase	0.0	21 / 0
Serine/threonine-protein kinase WEE1	WEE1	P30291	CHEMBL5491	Kinase	0.0	3 / 0
Plasminogen	PLG	P00747	CHEMBL1801	Protease	0.0	2 / 0
Trypsin I	PRSS1	P07477	CHEMBL209	Protease	0.0	2 / 0
Cyclin-dependent kinase 2	CDK2	P24941	CHEMBL301	Kinase	0.0	12 / 0
Maternal embryonic leucine zipper kinase	MELK	Q14680	CHEMBL4578	Kinase	0.0	8 / 0
Axin1/beta-catenin	CTNNB1	P35222	CHEMBL5866	Unclassified protein	0.0	1 / 0
Vasopressin V2 receptor	AVPR2	P30518	CHEMBL1790	Family A G protein-coupled receptor	0.0	1 / 0
Type-1 angiotensin II receptor	AGTR1	P30556	CHEMBL227	Family A G protein-coupled receptor	0.0	1 / 0
Interleukin-8 receptor A	CXCR1	P25024	CHEMBL4029	Family A G protein-coupled receptor	0.0	2 / 0
Tissue-type plasminogen activator	PLAT	P00750	CHEMBL1873	Protease	0.0	1 / 0
Protein kinase C gamma	PRKCG	P05129	CHEMBL2938	Kinase	0.0	48 / 0
Protein kinase C delta	PRKCD	Q05655	CHEMBL2996	Kinase	0.0	50 / 0
Protein kinase C alpha	PRKCA	P17252	CHEMBL299	Kinase	0.0	52 / 0
Protein kinase C beta	PRKCB	P05771	CHEMBL3045	Kinase	0.0	54 / 0
Protein kinase C epsilon	PRKCE	Q02156	CHEMBL3582	Kinase	0.0	50 / 0
Protein kinase C eta	PRKCH	P24723	CHEMBL3616	Kinase	0.0	48 / 0
cAMP-dependent protein kinase alpha-catalytic subunit	PRKACA	P17612	CHEMBL4101	Kinase	0.0	15 / 0
Matrix metalloproteinase 9	MMP9	P14780	CHEMBL321	Protease	0.0	1 / 0
Matrix metalloproteinase 1	MMP1	P03956	CHEMBL332	Protease	0.0	1 / 0
Matrix metalloproteinase 2	MMP2	P08253	CHEMBL333	Protease	0.0	2 / 0
Matrix metalloproteinase 8	MMP8	P22894	CHEMBL4588	Protease	0.0	1 / 0
Voltage-gated potassium channel subunit Kv1.3	KCNA3	P22001	CHEMBL4633	Voltage-gated ion channel	0.0	0 / 19
Serine/threonine-protein kinase RAF	RAF1	P04049	CHEMBL1906	Kinase	0.0	3 / 0
Cyclin-dependent kinase 1/cyclin B1	CDK1 CCNB1	P06493 P14635	CHEMBL1907602	Other cytosolic protein	0.0	7 / 0
Cyclin-dependent kinase 2/cyclin E	CCNE2 CDK2 CCNE1	O96020 P24941 P24864	CHEMBL2094126	Other cytosolic protein	0.0	7 / 0
Cytochrome P450 19A1	CYP19A1	P11511	CHEMBL1978	Cytochrome P450	0.0	6 / 9
Arachidonate 5-lipoxygenase	ALOX5	P09917	CHEMBL215	Oxidoreductase	0.0	1 / 1
Cannabinoid receptor 2	CNR2	P34972	CHEMBL253	Family A G protein-coupled receptor	0.0	3 / 35
Ribosomal protein S6 kinase alpha 3	RPS6KA3	P51812	CHEMBL2345	Kinase	0.0	8 / 0
Metastin receptor	KISS1R	Q969F8	CHEMBL5413	Family A G protein-coupled receptor	0.0	20 / 0
DNA ligase 1	LIG1	P18858	CHEMBL5694	Enzyme	0.0	1 / 0
Deoxyribonuclease gamma	DNASE1L3	Q13609	CHEMBL1649048	Enzyme	0.0	1 / 0
Heat shock cognate 71 kDa protein	HSPA8	P11142	CHEMBL1275223	Other cytosolic protein	0.0	1 / 0
Plasminogen activator inhibitor-1	SERPINE1	P05121	CHEMBL3475	Secreted protein	0.0	3 / 0
Stem cell growth factor receptor	KIT	P10721	CHEMBL1936	Kinase	0.0	3 / 0
Dihydroorotate dehydrogenase	DHODH	Q02127	CHEMBL1966	Oxidoreductase	0.0	14 / 0
GABA-A receptor; alpha-3/beta-3/gamma-2	GABRB3 GABRA3 GABRG2	P28472 P34903 P18507	CHEMBL2094120	Ligand-gated ion channel	0.0	2 / 0
GABA-A receptor; alpha-1/beta-3/gamma-2	GABRB3 GABRG2 GABRA1	P28472 P18507 P14867	CHEMBL2094121	Ligand-gated ion channel	0.0	2 / 0
Delta opioid receptor	OPRD1	P41143	CHEMBL236	Family A G protein-coupled receptor	0.0	3 / 0
CCR4-NOT transcription complex subunit 7	CNOT7	Q9UIV1	CHEMBL3616361	Hydrolase	0.0	1 / 0
Calcium-activated potassium channel subunit alpha-1	KCNMA1	Q12791	CHEMBL4304	Voltage-gated ion channel	0.0	1 / 0
Carbonic anhydrase III	CA3	P07451	CHEMBL2885	Lyase	0.0	0 / 4
Carbonic anhydrase VB	CA5B	Q9Y2D0	CHEMBL3969	Lyase	0.0	0 / 4
Cyclin-dependent kinase 6	CDK6	Q00534	CHEMBL2508	Kinase	0.0	2 / 0
Inhibitor of NF-kappa-B kinase (IKK)	CHUK	O15111	CHEMBL3476	Kinase	0.0	1 / 0
