# Supplementary material for: A Network Pharmacology-Based Study on Irritable Bowel Syndrome Prevention and Treatment Utilizing Shenling Baizhu Powder
Source: Biomed Res Int. 2021 Nov 23;2021:4579850. doi: 10.1155/2021/4579850 (PMC8632384; doi:10.1155/2021/4579850)
Supplement: Supplementary Materials — Please find detailed data in the supplementary file, including the original data of SymMap, metabolomics, and molecular docking of Shenling Baizhu powder. “Shenling Baizhu powder SymMap” includes all herbal targets and combined targets. “Shenling Baizhu powder metabolomics” includes two-dimensional structural data analysis. “Molecular docking” involves molecule-target docking and the results. [file 4579850.f1.zip › Data in brief/2. Shenling Baizhu powder Metabolomics/2D structure/65.csv]

Target	Common name	Uniprot ID	ChEMBL ID	Target Class	Probability*	Known actives (3D/2D)
Monoamine oxidase B	MAOB	P27338	CHEMBL2039	Oxidoreductase	0.109507900685	23 / 87
Macrophage migration inhibitory factor	MIF	P14174	CHEMBL2085	Enzyme	0.0524239602665	0 / 8
11-beta-hydroxysteroid dehydrogenase 1	HSD11B1	P28845	CHEMBL4235	Enzyme	0.0428942118511	0 / 5
Carbonic anhydrase XII	CA12	O43570	CHEMBL3242	Lyase	0.0428942118511	7 / 13
Dipeptidyl peptidase I	CTSC	P53634	CHEMBL2252	Protease	0.0428942118511	6 / 0
CDC7/DBF4 (Cell division cycle 7-related protein kinase/Activator of S phase kinase)	CDC7	O00311	CHEMBL5443	Kinase	0.0428942118511	2 / 0
Carbonic anhydrase IX	CA9	Q16790	CHEMBL3594	Lyase	0.0428942118511	7 / 30
Carbonic anhydrase II	CA2	P00918	CHEMBL205	Lyase	0.0428942118511	37 / 6
Carbonic anhydrase I	CA1	P00915	CHEMBL261	Lyase	0.0428942118511	22 / 11
Histone acetyltransferase PCAF	KAT2B	Q92831	CHEMBL5500	Writer	0.0428942118511	6 / 0
Amine oxidase, copper containing	AOC3	Q16853	CHEMBL3437	Enzyme	0.0428942118511	9 / 0
Serine/threonine-protein kinase Chk1	CHEK1	O14757	CHEMBL4630	Kinase	0.0428942118511	10 / 0
G-protein coupled receptor 55	GPR55	Q9Y2T6	CHEMBL1075322	Family A G protein-coupled receptor	0.0428942118511	0 / 18
Cannabinoid receptor 1 (by homology)	CNR1	P21554	CHEMBL218	Family A G protein-coupled receptor	0.0428942118511	0 / 28
Serotonin transporter (by homology)	SLC6A4	P31645	CHEMBL228	Electrochemical transporter	0.0428942118511	60 / 0
Adrenergic receptor alpha-2	ADRA2C	P18825	CHEMBL1916	Family A G protein-coupled receptor	0.0428942118511	4 / 0
Kynurenine/alpha-aminoadipate aminotransferase, mitochondrial	AADAT	Q8N5Z0	CHEMBL2046259	Enzyme	0.0428942118511	38 / 0
Serine/threonine-protein kinase ILK-1	ILK	Q13418	CHEMBL5247	Kinase	0.0428942118511	1 / 0
Muscarinic acetylcholine receptor M1	CHRM1	P11229	CHEMBL216	Family A G protein-coupled receptor	0.0428942118511	7 / 0
Dipeptidyl peptidase II	DPP7	Q9UHL4	CHEMBL3976	Protease	0.0428942118511	30 / 0
Beta amyloid A4 protein	APP	P05067	CHEMBL2487	Membrane receptor	0.0428942118511	0 / 3
Carbonic anhydrase III	CA3	P07451	CHEMBL2885	Lyase	0.0428942118511	0 / 4
Carbonic anhydrase VA	CA5A	P35218	CHEMBL4789	Lyase	0.0428942118511	0 / 8
Dopamine transporter (by homology)	SLC6A3	Q01959	CHEMBL238	Electrochemical transporter	0.0	46 / 0
Neuronal acetylcholine receptor; alpha3/beta4	CHRNA3 CHRNB4	P32297 P30926	CHEMBL1907594	Ligand-gated ion channel	0.0	22 / 0
Neuronal acetylcholine receptor; alpha4/beta2	CHRNA4 CHRNB2	P43681 P17787	CHEMBL1907589	Ligand-gated ion channel	0.0	27 / 0
Kynurenine--oxoglutarate transaminase 3	KYAT3	Q6YP21	CHEMBL2046260	Enzyme	0.0	3 / 0
Serotonin 1b (5-HT1b) receptor (by homology)	HTR1B	P28222	CHEMBL1898	Family A G protein-coupled receptor	0.0	29 / 0
Tyrosine-protein kinase JAK2	JAK2	O60674	CHEMBL2971	Kinase	0.0	3 / 0
Tyrosine-protein kinase TYK2	TYK2	P29597	CHEMBL3553	Kinase	0.0	2 / 0
Serine/threonine-protein kinase AKT	AKT1	P31749	CHEMBL4282	Kinase	0.0	10 / 0
Trace amine-associated receptor 1	TAAR1	Q96RJ0	CHEMBL5857	Family A G protein-coupled receptor	0.0	8 / 0
Dipeptidyl peptidase VIII	DPP8	Q6V1X1	CHEMBL4657	Protease	0.0	8 / 0
Acetylcholinesterase	ACHE	P22303	CHEMBL220	Hydrolase	0.0	0 / 3
Dihydropteridine reductase	QDPR	P09417	CHEMBL3730	Enzyme	0.0	6 / 0
Inhibitor of nuclear factor kappa B kinase beta subunit	IKBKB	O14920	CHEMBL1991	Kinase	0.0	15 / 0
Alpha-1a adrenergic receptor	ADRA1A	P35348	CHEMBL229	Family A G protein-coupled receptor	0.0	2 / 0
Dipeptidyl peptidase IV	DPP4	P27487	CHEMBL284	Protease	0.0	40 / 0
Poly [ADP-ribose] polymerase-1	PARP1	P09874	CHEMBL3105	Enzyme	0.0	10 / 0
Rho-associated protein kinase 1	ROCK1	Q13464	CHEMBL3231	Kinase	0.0	10 / 0
Alpha-2a adrenergic receptor	ADRA2A	P08913	CHEMBL1867	Family A G protein-coupled receptor	0.0	3 / 0
Serotonin 4 (5-HT4) receptor	HTR4	Q13639	CHEMBL1875	Family A G protein-coupled receptor	0.0	5 / 0
Histamine H4 receptor	HRH4	Q9H3N8	CHEMBL3759	Family A G protein-coupled receptor	0.0	28 / 0
Ribosomal protein S6 kinase alpha 5	RPS6KA5	O75582	CHEMBL4237	Kinase	0.0	5 / 0
Neuronal acetylcholine receptor protein alpha-4 subunit	CHRNA4	P43681	CHEMBL1882	Ligand-gated ion channel	0.0	14 / 0
Mu opioid receptor (by homology)	OPRM1	P35372	CHEMBL233	Family A G protein-coupled receptor	0.0	7 / 0
Cyclooxygenase-2	PTGS2	P35354	CHEMBL230	Oxidoreductase	0.0	2 / 0
Neurokinin 1 receptor (by homology)	TACR1	P25103	CHEMBL249	Family A G protein-coupled receptor	0.0	6 / 0
Trace amine-associated receptor 5	TAAR5	O14804	CHEMBL3714046	Family A G protein-coupled receptor	0.0	1 / 0
Gamma-amino-N-butyrate transaminase (by homology)	ABAT	P80404	CHEMBL2044	Transferase	0.0	7 / 0
Plasma kallikrein	KLKB1	P03952	CHEMBL2000	Protease	0.0	2 / 0
Dopamine D1 receptor	DRD1	P21728	CHEMBL2056	Family A G protein-coupled receptor	0.0	20 / 0
PDZ-binding kinase	PBK	Q96KB5	CHEMBL4896	Kinase	0.0	6 / 0
Cannabinoid receptor 2	CNR2	P34972	CHEMBL253	Family A G protein-coupled receptor	0.0	0 / 37
Rho-associated protein kinase 2	ROCK2	O75116	CHEMBL2973	Kinase	0.0	24 / 0
Dipeptidyl peptidase IX	DPP9	Q86TI2	CHEMBL4793	Protease	0.0	6 / 0
Metastin receptor	KISS1R	Q969F8	CHEMBL5413	Family A G protein-coupled receptor	0.0	4 / 0
Lysine-specific demethylase 4D-like	KDM4E	B2RXH2	CHEMBL1293226	Eraser	0.0	2 / 0
Dopamine D5 receptor	DRD5	P21918	CHEMBL1850	Family A G protein-coupled receptor	0.0	3 / 0
Norepinephrine transporter	SLC6A2	P23975	CHEMBL222	Electrochemical transporter	0.0	39 / 0
Purine nucleoside phosphorylase	PNP	P00491	CHEMBL4338	Enzyme	0.0	1 / 0
Matrix metalloproteinase 9	MMP9	P14780	CHEMBL321	Protease	0.0	0 / 3
ADAM17	ADAM17	P78536	CHEMBL3706	Protease	0.0	0 / 14
Kinesin-like protein 1	KIF11	P52732	CHEMBL4581	Other cytosolic protein	0.0	1 / 0
Lysine-specific histone demethylase 1	KDM1A	O60341	CHEMBL6136	Eraser	0.0	7 / 0
Alpha-2b adrenergic receptor	ADRA2B	P18089	CHEMBL1942	Family A G protein-coupled receptor	0.0	2 / 0
Nitric oxide synthase, inducible (by homology)	NOS2	P35228	CHEMBL4481	Enzyme	0.0	9 / 0
Serotonin 2a (5-HT2a) receptor	HTR2A	P28223	CHEMBL224	Family A G protein-coupled receptor	0.0	122 / 13
Serotonin 2c (5-HT2c) receptor	HTR2C	P28335	CHEMBL225	Family A G protein-coupled receptor	0.0	91 / 6
Diamine oxidase	AOC1	P19801	CHEMBL2118	Enzyme	0.0	7 / 0
Matrix metalloproteinase 13	MMP13	P45452	CHEMBL280	Protease	0.0	1 / 0
Matrix metalloproteinase 3	MMP3	P08254	CHEMBL283	Protease	0.0	1 / 0
Matrix metalloproteinase 1	MMP1	P03956	CHEMBL332	Protease	0.0	1 / 0
Matrix metalloproteinase 7	MMP7	P09237	CHEMBL4073	Protease	0.0	1 / 0
Glyceraldehyde-3-phosphate dehydrogenase liver	GAPDH	P04406	CHEMBL2284	Oxidoreductase	0.0	1 / 0
Serotonin 1e (5-HT1e) receptor	HTR1E	P28566	CHEMBL2182	Family A G protein-coupled receptor	0.0	1 / 0
Adenosine A3 receptor	ADORA3	P0DMS8	CHEMBL256	Family A G protein-coupled receptor	0.0	2 / 0
Serotonin 7 (5-HT7) receptor	HTR7	P34969	CHEMBL3155	Family A G protein-coupled receptor	0.0	7 / 0
Serotonin 6 (5-HT6) receptor	HTR6	P50406	CHEMBL3371	Family A G protein-coupled receptor	0.0	17 / 0
Serotonin 5a (5-HT5a) receptor	HTR5A	P47898	CHEMBL3426	Family A G protein-coupled receptor	0.0	1 / 0
NAD-dependent deacetylase sirtuin 2	SIRT2	Q8IXJ6	CHEMBL4462	Eraser	0.0	1 / 0
NAD-dependent deacetylase sirtuin 1	SIRT1	Q96EB6	CHEMBL4506	Eraser	0.0	1 / 0
Myeloperoxidase	MPO	P05164	CHEMBL2439	Enzyme	0.0	2 / 0
Methionine aminopeptidase 1	METAP1	P53582	CHEMBL2474	Protease	0.0	1 / 0
Kappa Opioid receptor	OPRK1	P41145	CHEMBL237	Family A G protein-coupled receptor	0.0	3 / 0
Tyrosyl-DNA phosphodiesterase 1	TDP1	Q9NUW8	CHEMBL1075138	Enzyme	0.0	2 / 0
Protein kinase C delta	PRKCD	Q05655	CHEMBL2996	Kinase	0.0	6 / 0
Protein kinase C alpha	PRKCA	P17252	CHEMBL299	Kinase	0.0	3 / 0
Protein kinase N2	PKN2	Q16513	CHEMBL3032	Kinase	0.0	3 / 0
Protein kinase C beta	PRKCB	P05771	CHEMBL3045	Kinase	0.0	3 / 0
Protein kinase N1	PKN1	Q16512	CHEMBL3384	Kinase	0.0	1 / 0
Protein kinase C epsilon	PRKCE	Q02156	CHEMBL3582	Kinase	0.0	7 / 0
Protein kinase C eta	PRKCH	P24723	CHEMBL3616	Kinase	0.0	6 / 0
Protein kinase C mu	PRKD1	Q15139	CHEMBL3863	Kinase	0.0	1 / 0
Protein kinase C theta	PRKCQ	Q04759	CHEMBL3920	Kinase	0.0	6 / 0
Thromboxane A2 receptor	TBXA2R	P21731	CHEMBL2069	Family A G protein-coupled receptor	0.0	0 / 2
Quinone reductase 1	NQO1	P15559	CHEMBL3623	Enzyme	0.0	0 / 40
Histamine H3 receptor	HRH3	Q9Y5N1	CHEMBL264	Family A G protein-coupled receptor	0.0	21 / 0
Indoleamine 2,3-dioxygenase	IDO1	P14902	CHEMBL4685	Enzyme	0.0	1 / 0
Histamine H1 receptor	HRH1	P35367	CHEMBL231	Family A G protein-coupled receptor	0.0	6 / 0
