# Supplementary material for: A Network Pharmacology-Based Study on Irritable Bowel Syndrome Prevention and Treatment Utilizing Shenling Baizhu Powder
Source: Biomed Res Int. 2021 Nov 23;2021:4579850. doi: 10.1155/2021/4579850 (PMC8632384; doi:10.1155/2021/4579850)
Supplement: Supplementary Materials — Please find detailed data in the supplementary file, including the original data of SymMap, metabolomics, and molecular docking of Shenling Baizhu powder. “Shenling Baizhu powder SymMap” includes all herbal targets and combined targets. “Shenling Baizhu powder metabolomics” includes two-dimensional structural data analysis. “Molecular docking” involves molecule-target docking and the results. [file 4579850.f1.zip › Data in brief/2. Shenling Baizhu powder Metabolomics/2D structure/66.csv]

Target	Common name	Uniprot ID	ChEMBL ID	Target Class	Probability*	Known actives (3D/2D)
Protein-tyrosine phosphatase 1B	PTPN1	P18031	CHEMBL335	Phosphatase	0.153290396807	13 / 13
Cytochrome P450 19A1	CYP19A1	P11511	CHEMBL1978	Cytochrome P450	0.113285953487	9 / 11
Acetylcholinesterase	ACHE	P22303	CHEMBL220	Hydrolase	0.113285953487	6 / 39
Aldehyde dehydrogenase	ALDH2	P05091	CHEMBL1935	Oxidoreductase	0.113285953487	0 / 36
Phosphodiesterase 10A	PDE10A	Q9Y233	CHEMBL4409	Phosphodiesterase	0.113285953487	5 / 0
Serine/threonine-protein kinase Chk2	CHEK2	O96017	CHEMBL2527	Kinase	0.113285953487	40 / 0
Receptor-type tyrosine-protein phosphatase S	PTPRS	Q13332	CHEMBL2396508	Phosphatase	0.113285953487	0 / 2
Epidermal growth factor receptor erbB1	EGFR	P00533	CHEMBL203	Kinase	0.113285953487	5 / 5
Macrophage migration inhibitory factor	MIF	P14174	CHEMBL2085	Enzyme	0.113285953487	0 / 3
Tyrosinase (by homology)	TYR	P14679	CHEMBL1973	Oxidoreductase	0.113285953487	0 / 1
Carbonic anhydrase XII	CA12	O43570	CHEMBL3242	Lyase	0.113285953487	9 / 6
Heat shock protein HSP 90-alpha	HSP90AA1	P07900	CHEMBL3880	Other cytosolic protein	0.113285953487	43 / 0
Heat shock protein HSP 90-beta	HSP90AB1	P08238	CHEMBL4303	Other cytosolic protein	0.113285953487	17 / 0
Estradiol 17-beta-dehydrogenase 2	HSD17B2	P37059	CHEMBL2789	Enzyme	0.113285953487	6 / 1
Adrenergic receptor beta	ADRB2	P07550	CHEMBL210	Family A G protein-coupled receptor	0.113285953487	67 / 0
Beta-1 adrenergic receptor	ADRB1	P08588	CHEMBL213	Family A G protein-coupled receptor	0.113285953487	67 / 0
Androgen Receptor (by homology)	AR	P10275	CHEMBL1871	Nuclear receptor	0.113285953487	3 / 0
Interleukin-2	IL2	P60568	CHEMBL5880	Secreted protein	0.113285953487	0 / 4
Kappa Opioid receptor	OPRK1	P41145	CHEMBL237	Family A G protein-coupled receptor	0.113285953487	2 / 0
ATP-binding cassette sub-family G member 2	ABCG2	Q9UNQ0	CHEMBL5393	Primary active transporter	0.113285953487	2 / 17
Tyrosine-protein kinase SRC	SRC	P12931	CHEMBL267	Kinase	0.113285953487	8 / 0
Cyclin-dependent kinase 2	CDK2	P24941	CHEMBL301	Kinase	0.113285953487	13 / 0
Cyclin-dependent kinase 1	CDK1	P06493	CHEMBL308	Kinase	0.113285953487	11 / 0
P-glycoprotein 1	ABCB1	P08183	CHEMBL4302	Primary active transporter	0.113285953487	12 / 23
Norepinephrine transporter	SLC6A2	P23975	CHEMBL222	Electrochemical transporter	0.113285953487	0 / 1
Xanthine dehydrogenase	XDH	P47989	CHEMBL1929	Oxidoreductase	0.113285953487	1 / 10
Serine/threonine-protein kinase WEE1	WEE1	P30291	CHEMBL5491	Kinase	0.113285953487	5 / 0
Peroxisome proliferator-activated receptor alpha	PPARA	Q07869	CHEMBL239	Nuclear receptor	0.113285953487	0 / 1
Maternal embryonic leucine zipper kinase	MELK	Q14680	CHEMBL4578	Kinase	0.113285953487	142 / 0
Serine/threonine-protein kinase RAF	RAF1	P04049	CHEMBL1906	Kinase	0.113285953487	7 / 0
Pyruvate dehydrogenase kinase isoform 1	PDK1	Q15118	CHEMBL4766	Kinase	0.113285953487	40 / 0
NADPH oxidase 4	NOX4	Q9NPH5	CHEMBL1250375	Enzyme	0.113285953487	0 / 4
Serine/threonine-protein kinase Chk1	CHEK1	O14757	CHEMBL4630	Kinase	0.0	22 / 0
Monoamine oxidase B	MAOB	P27338	CHEMBL2039	Oxidoreductase	0.0	1 / 49
Dopamine D2 receptor	DRD2	P14416	CHEMBL217	Family A G protein-coupled receptor	0.0	45 / 0
Dopamine D4 receptor	DRD4	P21917	CHEMBL219	Family A G protein-coupled receptor	0.0	3 / 0
Type-1 angiotensin II receptor	AGTR1	P30556	CHEMBL227	Family A G protein-coupled receptor	0.0	1 / 0
Serine/threonine-protein kinase PIM2	PIM2	Q9P1W9	CHEMBL4523	Kinase	0.0	6 / 0
Serine/threonine-protein kinase PIM3	PIM3	Q86V86	CHEMBL5407	Kinase	0.0	6 / 0
Thromboxane-A synthase	TBXAS1	P24557	CHEMBL1835	Cytochrome P450	0.0	0 / 1
Maltase-glucoamylase	MGAM	O43451	CHEMBL2074	Hydrolase	0.0	0 / 1
Estrogen-related receptor alpha	ESRRA	P11474	CHEMBL3429	Nuclear receptor	0.0	0 / 1
Estrogen-related receptor beta	ESRRB	O95718	CHEMBL3751	Nuclear receptor	0.0	0 / 1
Adenosine A1 receptor (by homology)	ADORA1	P30542	CHEMBL226	Family A G protein-coupled receptor	0.0	0 / 5
Toll-like receptor (TLR7/TLR9)	TLR9	Q9NR96	CHEMBL5804	Toll-like and Il-1 receptors	0.0	0 / 1
Glucagon receptor (by homology)	GCGR	P47871	CHEMBL1985	Family B G protein-coupled receptor	0.0	45 / 0
Dual specificity phosphatase Cdc25B	CDC25B	P30305	CHEMBL4804	Phosphatase	0.0	1 / 0
Cyclin-dependent kinase 1/cyclin B1	CDK1 CCNB1	P06493 P14635	CHEMBL1907602	Other cytosolic protein	0.0	8 / 0
CCR4-NOT transcription complex subunit 7	CNOT7	Q9UIV1	CHEMBL3616361	Hydrolase	0.0	1 / 0
Ribosomal protein S6 kinase alpha 3	RPS6KA3	P51812	CHEMBL2345	Kinase	0.0	15 / 0
Inhibitor of nuclear factor kappa B kinase beta subunit	IKBKB	O14920	CHEMBL1991	Kinase	0.0	29 / 0
Protein kinase C iota	PRKCI	P41743	CHEMBL2598	Kinase	0.0	1 / 0
Estrogen receptor alpha	ESR1	P03372	CHEMBL206	Nuclear receptor	0.0	6 / 34
Serotonin 1b (5-HT1b) receptor	HTR1B	P28222	CHEMBL1898	Family A G protein-coupled receptor	0.0	2 / 0
Serotonin 1d (5-HT1d) receptor	HTR1D	P28221	CHEMBL1983	Family A G protein-coupled receptor	0.0	1 / 0
Serotonin 1a (5-HT1a) receptor	HTR1A	P08908	CHEMBL214	Family A G protein-coupled receptor	0.0	2 / 0
Cyclin-dependent kinase 4/cyclin D1	CCND1 CDK4	P24385 P11802	CHEMBL1907601	Kinase	0.0	18 / 0
Cyclin-dependent kinase 2/cyclin E	CCNE2 CDK2 CCNE1	O96020 P24941 P24864	CHEMBL2094126	Other cytosolic protein	0.0	8 / 0
Dihydroorotate dehydrogenase	DHODH	Q02127	CHEMBL1966	Oxidoreductase	0.0	22 / 0
NAD-dependent deacetylase sirtuin 1	SIRT1	Q96EB6	CHEMBL4506	Eraser	0.0	16 / 0
Metastin receptor	KISS1R	Q969F8	CHEMBL5413	Family A G protein-coupled receptor	0.0	21 / 0
Glutamate [NMDA] receptor subunit epsilon 2	GRIN2B	Q13224	CHEMBL1904	Ligand-gated ion channel	0.0	13 / 0
Estradiol 17-beta-dehydrogenase 1	HSD17B1	P14061	CHEMBL3181	Enzyme	0.0	5 / 1
Carbonic anhydrase II	CA2	P00918	CHEMBL205	Lyase	0.0	22 / 11
Carbonic anhydrase I	CA1	P00915	CHEMBL261	Lyase	0.0	10 / 11
Cyclin-dependent kinase 2/cyclin A	CDK2 CCNA1 CCNA2	P24941 P78396 P20248	CHEMBL2094128	Other cytosolic protein	0.0	2 / 0
Cystic fibrosis transmembrane conductance regulator	CFTR	P13569	CHEMBL4051	Other ion channel	0.0	1 / 0
Pituitary adenylate cyclase-activating polypeptide type I receptor	ADCYAP1R1	P41586	CHEMBL5399	Unclassified protein	0.0	2 / 0
Egl nine homolog 1	EGLN1	Q9GZT9	CHEMBL5697	Oxidoreductase	0.0	5 / 0
Urokinase-type plasminogen activator	PLAU	P00749	CHEMBL3286	Protease	0.0	6 / 0
Endoplasmin	HSP90B1	P14625	CHEMBL1075323	Other membrane protein	0.0	39 / 0
Serotonin 4 (5-HT4) receptor	HTR4	Q13639	CHEMBL1875	Family A G protein-coupled receptor	0.0	2 / 0
Carbonic anhydrase VII	CA7	P43166	CHEMBL2326	Lyase	0.0	4 / 6
Cyclin-dependent kinase 4	CDK4	P11802	CHEMBL331	Kinase	0.0	6 / 0
Mu opioid receptor (by homology)	OPRM1	P35372	CHEMBL233	Family A G protein-coupled receptor	0.0	11 / 0
Nuclear factor NF-kappa-B p105 subunit	NFKB1	P19838	CHEMBL3251	Other cytosolic protein	0.0	0 / 1
Serine/threonine-protein kinase mTOR	MTOR	P42345	CHEMBL2842	Kinase	0.0	1 / 0
6-phosphofructo-2-kinase/fructose-2,6-bisphosphatase 3	PFKFB3	Q16875	CHEMBL2331053	Enzyme	0.0	0 / 1
Thrombin and coagulation factor X	F10	P00742	CHEMBL244	Protease	0.0	14 / 0
Thrombin	F2	P00734	CHEMBL204	Protease	0.0	3 / 0
DNA excision repair protein ERCC-5	ERCC5	P28715	CHEMBL4736	Other nuclear protein	0.0	3 / 0
Flap endonuclease 1	FEN1	P39748	CHEMBL5027	Enzyme	0.0	3 / 0
Signal transducer and activator of transcription 6	STAT6	P42226	CHEMBL5401	Transcription factor	0.0	1 / 0
Histone-arginine methyltransferase CARM1	CARM1	Q86X55	CHEMBL5406	Writer	0.0	2 / 0
Monoamine oxidase A	MAOA	P21397	CHEMBL1951	Oxidoreductase	0.0	2 / 10
Dynamin-2	DNM2	P50570	CHEMBL5812	Enzyme	0.0	1 / 0
C-C chemokine receptor type 4	CCR4	P51679	CHEMBL2414	Family A G protein-coupled receptor	0.0	5 / 0
Inhibitor of NF-kappa-B kinase (IKK)	CHUK	O15111	CHEMBL3476	Kinase	0.0	1 / 0
Alkaline phosphatase, tissue-nonspecific isozyme	ALPL	P05186	CHEMBL5979	Enzyme	0.0	1 / 0
Bcl2-antagonist of cell death (BAD)	BAD	Q92934	CHEMBL3817	Other cytosolic protein	0.0	0 / 1
Plasma kallikrein	KLKB1	P03952	CHEMBL2000	Protease	0.0	2 / 0
Dual specificity protein phosphatase 3	DUSP3	P51452	CHEMBL2635	Phosphatase	0.0	2 / 0
G-protein coupled receptor 84	GPR84	Q9NQS5	CHEMBL3714079	Family A G protein-coupled receptor	0.0	2 / 0
Serine/threonine-protein kinase/endoribonuclease IRE1	ERN1	O75460	CHEMBL1163101	Enzyme	0.0	6 / 0
Alpha-1d adrenergic receptor	ADRA1D	P25100	CHEMBL223	Family A G protein-coupled receptor	0.0	18 / 0
Apoptosis regulator Bcl-2	BCL2	P10415	CHEMBL4860	Other ion channel	0.0	3 / 4
Leucine-rich repeat serine/threonine-protein kinase 2	LRRK2	Q5S007	CHEMBL1075104	Kinase	0.0	1 / 0
G protein-coupled receptor kinase 7	GRK7	Q8WTQ7	CHEMBL1075133	Kinase	0.0	1 / 0
Homeodomain-interacting protein kinase 4	HIPK4	Q8NE63	CHEMBL1075167	Kinase	0.0	1 / 0
Serine/threonine-protein kinase TAO2	TAOK2	Q9UL54	CHEMBL1075195	Kinase	0.0	1 / 0
