# Supplementary material for: A Network Pharmacology-Based Study on Irritable Bowel Syndrome Prevention and Treatment Utilizing Shenling Baizhu Powder
Source: Biomed Res Int. 2021 Nov 23;2021:4579850. doi: 10.1155/2021/4579850 (PMC8632384; doi:10.1155/2021/4579850)
Supplement: Supplementary Materials — Please find detailed data in the supplementary file, including the original data of SymMap, metabolomics, and molecular docking of Shenling Baizhu powder. “Shenling Baizhu powder SymMap” includes all herbal targets and combined targets. “Shenling Baizhu powder metabolomics” includes two-dimensional structural data analysis. “Molecular docking” involves molecule-target docking and the results. [file 4579850.f1.zip › Data in brief/2. Shenling Baizhu powder Metabolomics/2D structure/67.csv]

Target	Common name	Uniprot ID	ChEMBL ID	Target Class	Probability*	Known actives (3D/2D)
Tyrosinase	TYR	P14679	CHEMBL1973	Oxidoreductase	0.951301028093	2 / 5
Protein-tyrosine phosphatase 1B	PTPN1	P18031	CHEMBL335	Phosphatase	0.12128700335	61 / 14
Estradiol 17-beta-dehydrogenase 2	HSD17B2	P37059	CHEMBL2789	Enzyme	0.113285953487	64 / 0
Acyl-CoA desaturase	SCD	O00767	CHEMBL5555	Enzyme	0.113285953487	43 / 0
Pyruvate dehydrogenase kinase isoform 1	PDK1	Q15118	CHEMBL4766	Kinase	0.113285953487	78 / 0
Aldehyde dehydrogenase	ALDH2	P05091	CHEMBL1935	Oxidoreductase	0.113285953487	18 / 0
Epoxide hydratase	EPHX2	P34913	CHEMBL2409	Protease	0.113285953487	80 / 0
Aldo-keto reductase family 1 member B10	AKR1B10	O60218	CHEMBL5983	Enzyme	0.113285953487	19 / 0
Plectin	PLEC	Q15149	CHEMBL1293240	Unclassified protein	0.113285953487	2 / 0
Neuronal acetylcholine receptor protein alpha-7 subunit	CHRNA7	P36544	CHEMBL2492	Ligand-gated ion channel	0.113285953487	12 / 0
TGF-beta receptor type I	TGFBR1	P36897	CHEMBL4439	Kinase	0.113285953487	44 / 0
Activin receptor type-1 (by homology)	ACVR1	Q04771	CHEMBL5903	Kinase	0.113285953487	4 / 0
Matrix metalloproteinase 1	MMP1	P03956	CHEMBL332	Protease	0.113285953487	242 / 0
Serine/threonine-protein kinase/endoribonuclease IRE1	ERN1	O75460	CHEMBL1163101	Enzyme	0.113285953487	22 / 0
11-beta-hydroxysteroid dehydrogenase 1	HSD11B1	P28845	CHEMBL4235	Enzyme	0.113285953487	97 / 0
Protein farnesyltransferase	FNTA FNTB	P49354 P49356	CHEMBL2094108	Enzyme	0.113285953487	118 / 0
Rho-associated protein kinase 2	ROCK2	O75116	CHEMBL2973	Kinase	0.113285953487	293 / 0
Sphingosine 1-phosphate receptor Edg-3	S1PR3	Q99500	CHEMBL3892	Family A G protein-coupled receptor	0.113285953487	43 / 0
Sphingosine 1-phosphate receptor Edg-1	S1PR1	P21453	CHEMBL4333	Family A G protein-coupled receptor	0.113285953487	47 / 0
Rho-associated protein kinase 1	ROCK1	Q13464	CHEMBL3231	Kinase	0.113285953487	95 / 0
Serine/threonine-protein kinase Aurora-A	AURKA	O14965	CHEMBL4722	Kinase	0.113285953487	316 / 0
Cathepsin L	CTSL	P07711	CHEMBL3837	Protease	0.113285953487	31 / 2
NADP-dependent malic enzyme	ME1	P48163	CHEMBL3495	Enzyme	0.113285953487	3 / 0
Histone acetyltransferase p300	EP300	Q09472	CHEMBL3784	Writer	0.113285953487	6 / 0
Troponin, cardiac muscle	TNNC1 TNNT2 TNNI3	P63316 P45379 P19429	CHEMBL2095202	Unclassified protein	0.113285953487	4 / 0
Arachidonate 15-lipoxygenase	ALOX15	P16050	CHEMBL2903	Enzyme	0.113285953487	19 / 8
Vasopressin V1a receptor (by homology)	AVPR1A	P37288	CHEMBL1889	Family A G protein-coupled receptor	0.113285953487	32 / 0
Catechol O-methyltransferase	COMT	P21964	CHEMBL2023	Transferase	0.113285953487	2 / 0
Platelet activating factor receptor	PTAFR	P25105	CHEMBL250	Family A G protein-coupled receptor	0.113285953487	46 / 0
Adenosine A2a receptor	ADORA2A	P29274	CHEMBL251	Family A G protein-coupled receptor	0.113285953487	88 / 0
Adenosine A2b receptor	ADORA2B	P29275	CHEMBL255	Family A G protein-coupled receptor	0.113285953487	56 / 0
Phosphodiesterase 7A	PDE7A	Q13946	CHEMBL3012	Phosphodiesterase	0.113285953487	35 / 0
Maternal embryonic leucine zipper kinase	MELK	Q14680	CHEMBL4578	Kinase	0.113285953487	34 / 0
Dipeptidyl peptidase IV	DPP4	P27487	CHEMBL284	Protease	0.113285953487	309 / 0
Bone morphogenetic protein 4	BMP4	P12644	CHEMBL5350	Protease	0.113285953487	3 / 0
Ribosomal protein S6 kinase alpha 3	RPS6KA3	P51812	CHEMBL2345	Kinase	0.113285953487	21 / 0
Serine/threonine-protein kinase AKT2	AKT2	P31751	CHEMBL2431	Kinase	0.113285953487	12 / 0
Macrophage migration inhibitory factor	MIF	P14174	CHEMBL2085	Enzyme	0.113285953487	18 / 0
Cyclin-dependent kinase 2/cyclin A	CDK2 CCNA1 CCNA2	P24941 P78396 P20248	CHEMBL2094128	Other cytosolic protein	0.113285953487	40 / 0
ADAM17	ADAM17	P78536	CHEMBL3706	Protease	0.113285953487	117 / 0
Phosphodiesterase 5A	PDE5A	O76074	CHEMBL1827	Phosphodiesterase	0.113285953487	60 / 0
Tyrosine-protein kinase SYK	SYK	P43405	CHEMBL2599	Kinase	0.113285953487	59 / 0
Proto-oncogene tyrosine-protein kinase MER	MERTK	Q12866	CHEMBL5331	Kinase	0.113285953487	3 / 0
Beta secretase 2	BACE2	Q9Y5Z0	CHEMBL2525	Protease	0.113285953487	30 / 0
Hematopoietic prostaglandin D synthase	HPGDS	O60760	CHEMBL5879	Transferase	0.113285953487	11 / 0
Inosine-5'-monophosphate dehydrogenase 1	IMPDH1	P20839	CHEMBL1822	Oxidoreductase	0.113285953487	14 / 0
Glycogen synthase kinase-3 beta	GSK3B	P49841	CHEMBL262	Kinase	0.113285953487	77 / 0
Bone morphogenetic protein 1	BMP1	P13497	CHEMBL3898	Protease	0.113285953487	109 / 0
Serine/threonine-protein kinase Chk1	CHEK1	O14757	CHEMBL4630	Kinase	0.113285953487	99 / 0
Serine/threonine-protein kinase B-raf	BRAF	P15056	CHEMBL5145	Kinase	0.113285953487	80 / 0
MAP kinase-activated protein kinase 2	MAPKAPK2	P49137	CHEMBL2208	Kinase	0.113285953487	59 / 0
Muscarinic acetylcholine receptor M3	CHRM3	P20309	CHEMBL245	Family A G protein-coupled receptor	0.113285953487	67 / 0
Phosphodiesterase 4A	PDE4A	P27815	CHEMBL254	Phosphodiesterase	0.113285953487	25 / 0
Phosphodiesterase 4B	PDE4B	Q07343	CHEMBL275	Phosphodiesterase	0.113285953487	37 / 0
Phosphodiesterase 4D	PDE4D	Q08499	CHEMBL288	Phosphodiesterase	0.113285953487	18 / 0
Phosphodiesterase 4C	PDE4C	Q08493	CHEMBL291	Phosphodiesterase	0.113285953487	10 / 0
Glucagon receptor	GCGR	P47871	CHEMBL1985	Family B G protein-coupled receptor	0.113285953487	25 / 0
Matrix metalloproteinase 3	MMP3	P08254	CHEMBL283	Protease	0.113285953487	163 / 0
Perforin-1	PRF1	P14222	CHEMBL5480	Other ion channel	0.113285953487	30 / 0
Inhibitor of nuclear factor kappa B kinase epsilon subunit	IKBKE	Q14164	CHEMBL3529	Kinase	0.113285953487	12 / 0
Serine/threonine-protein kinase TBK1	TBK1	Q9UHD2	CHEMBL5408	Kinase	0.113285953487	12 / 0
Sterol regulatory element-binding protein 2	SREBF2	Q12772	CHEMBL1795166	Unclassified protein	0.113285953487	3 / 0
Cyclin-dependent kinase 2/cyclin E1	CCNE1 CDK2	P24864 P24941	CHEMBL1907605	Kinase	0.113285953487	42 / 0
Transitional endoplasmic reticulum ATPase	VCP	P55072	CHEMBL1075145	Primary active transporter	0.113285953487	29 / 0
Glutamate NMDA receptor; GRIN1/GRIN2B	GRIN1 GRIN2B	Q05586 Q13224	CHEMBL1907603	Ligand-gated ion channel	0.113285953487	19 / 0
Chymase	CMA1	P23946	CHEMBL4068	Protease	0.113285953487	16 / 0
Histone deacetylase 2	HDAC2	Q92769	CHEMBL1937	Eraser	0.113285953487	236 / 0
Casein kinase I alpha	CSNK1A1	P48729	CHEMBL2793	Kinase	0.113285953487	4 / 0
Serine/threonine-protein kinase PLK1	PLK1	P53350	CHEMBL3024	Kinase	0.113285953487	33 / 0
Histone deacetylase 10	HDAC10	Q969S8	CHEMBL5103	Eraser	0.113285953487	58 / 0
Serine/threonine-protein kinase TAO1	TAOK1	Q7L7X3	CHEMBL5261	Kinase	0.113285953487	8 / 0
Serine/threonine-protein kinase TAO3	TAOK3	Q9H2K8	CHEMBL5701	Kinase	0.113285953487	7 / 0
Monoamine oxidase B	MAOB	P27338	CHEMBL2039	Oxidoreductase	0.113285953487	85 / 44
Histone deacetylase 3	HDAC3	O15379	CHEMBL1829	Eraser	0.113285953487	190 / 0
c-Jun N-terminal kinase 3	MAPK10	P53779	CHEMBL2637	Kinase	0.113285953487	25 / 0
Vanilloid receptor	TRPV1	Q8NER1	CHEMBL4794	Voltage-gated ion channel	0.113285953487	276 / 0
Cyclin-dependent kinase 1/cyclin B1	CDK1 CCNB1	P06493 P14635	CHEMBL1907602	Other cytosolic protein	0.113285953487	11 / 0
6-phosphofructo-2-kinase/fructose-2,6-bisphosphatase 3	PFKFB3	Q16875	CHEMBL2331053	Enzyme	0.113285953487	36 / 0
Serine/threonine-protein kinase Chk2	CHEK2	O96017	CHEMBL2527	Kinase	0.113285953487	42 / 0
Serine/threonine-protein kinase WEE1	WEE1	P30291	CHEMBL5491	Kinase	0.113285953487	37 / 0
Lysine-specific histone demethylase 1	KDM1A	O60341	CHEMBL6136	Eraser	0.113285953487	13 / 0
Arachidonate 12-lipoxygenase	ALOX12	P18054	CHEMBL3687	Enzyme	0.113285953487	8 / 4
Acetyl-CoA carboxylase 1	ACACA	Q13085	CHEMBL3351	Enzyme	0.113285953487	46 / 0
PI3-kinase p110-alpha subunit	PIK3CA	P42336	CHEMBL4005	Enzyme	0.113285953487	153 / 0
Acetyl-CoA carboxylase 2	ACACB	O00763	CHEMBL4829	Ligase	0.113285953487	213 / 0
Macrophage colony stimulating factor receptor	CSF1R	P07333	CHEMBL1844	Kinase	0.113285953487	100 / 0
Phosphodiesterase 3	PDE3A	Q14432	CHEMBL241	Phosphodiesterase	0.113285953487	43 / 0
Phosphodiesterase 3B	PDE3B	Q13370	CHEMBL290	Phosphodiesterase	0.113285953487	41 / 0
Tyrosine-protein kinase ITK/TSK	ITK	Q08881	CHEMBL2959	Kinase	0.113285953487	79 / 0
Kinesin-like protein 1	KIF11	P52732	CHEMBL4581	Other cytosolic protein	0.113285953487	14 / 0
Tyrosine-protein kinase BTK	BTK	Q06187	CHEMBL5251	Kinase	0.113285953487	25 / 0
Histone deacetylase 11	HDAC11	Q96DB2	CHEMBL3310	Eraser	0.113285953487	55 / 0
Histone deacetylase 9	HDAC9	Q9UKV0	CHEMBL4145	Eraser	0.113285953487	40 / 0
Signal transducer and activator of transcription 6	STAT6	P42226	CHEMBL5401	Transcription factor	0.113285953487	13 / 0
ADAMTS5	ADAMTS5	Q9UNA0	CHEMBL2285	Protease	0.113285953487	18 / 0
ADAMTS4	ADAMTS4	O75173	CHEMBL2318	Protease	0.113285953487	8 / 0
Histone deacetylase 5	HDAC5	Q9UQL6	CHEMBL2563	Eraser	0.113285953487	35 / 0
Histone deacetylase 4	HDAC4	P56524	CHEMBL3524	Eraser	0.113285953487	65 / 0
ALK tyrosine kinase receptor	ALK	Q9UM73	CHEMBL4247	Kinase	0.113285953487	32 / 0
Glutamate carboxypeptidase II	FOLH1	Q04609	CHEMBL1892	Protease	0.113285953487	1 / 0
