# Supplementary material for: A Network Pharmacology-Based Study on Irritable Bowel Syndrome Prevention and Treatment Utilizing Shenling Baizhu Powder
Source: Biomed Res Int. 2021 Nov 23;2021:4579850. doi: 10.1155/2021/4579850 (PMC8632384; doi:10.1155/2021/4579850)
Supplement: Supplementary Materials — Please find detailed data in the supplementary file, including the original data of SymMap, metabolomics, and molecular docking of Shenling Baizhu powder. “Shenling Baizhu powder SymMap” includes all herbal targets and combined targets. “Shenling Baizhu powder metabolomics” includes two-dimensional structural data analysis. “Molecular docking” involves molecule-target docking and the results. [file 4579850.f1.zip › Data in brief/2. Shenling Baizhu powder Metabolomics/2D structure/68.csv]

Target	Common name	Uniprot ID	ChEMBL ID	Target Class	Probability*	Known actives (3D/2D)
ATP-binding cassette sub-family G member 2	ABCG2	Q9UNQ0	CHEMBL5393	Primary active transporter	0.673356703262	114 / 49
Aldose reductase	AKR1B1	P15121	CHEMBL1900	Enzyme	0.249234964625	35 / 68
Delta opioid receptor	OPRD1	P41143	CHEMBL236	Family A G protein-coupled receptor	0.161276819402	31 / 5
Mu opioid receptor	OPRM1	P35372	CHEMBL233	Family A G protein-coupled receptor	0.153290396807	48 / 1
Stem cell growth factor receptor	KIT	P10721	CHEMBL1936	Kinase	0.145250660164	139 / 2
Arachidonate 5-lipoxygenase	ALOX5	P09917	CHEMBL215	Oxidoreductase	0.13728888346	167 / 47
Cytochrome P450 1B1	CYP1B1	Q16678	CHEMBL4878	Cytochrome P450	0.13728888346	28 / 46
Cyclooxygenase-2	PTGS2	P35354	CHEMBL230	Oxidoreductase	0.13728888346	269 / 18
Adenosine A3 receptor	ADORA3	P0DMS8	CHEMBL256	Family A G protein-coupled receptor	0.129284219584	435 / 19
Nitric oxide synthase, inducible	NOS2	P35228	CHEMBL4481	Enzyme	0.129284219584	67 / 3
Carbonic anhydrase II	CA2	P00918	CHEMBL205	Lyase	0.129284219584	530 / 17
Carbonic anhydrase XII	CA12	O43570	CHEMBL3242	Lyase	0.129284219584	318 / 17
Carbonic anhydrase VII	CA7	P43166	CHEMBL2326	Lyase	0.12128700335	78 / 15
Multidrug resistance-associated protein 1	ABCC1	P33527	CHEMBL3004	Primary active transporter	0.12128700335	16 / 11
Adenosine A1 receptor (by homology)	ADORA1	P30542	CHEMBL226	Family A G protein-coupled receptor	0.12128700335	769 / 22
Telomerase reverse transcriptase	TERT	O14746	CHEMBL2916	Enzyme	0.12128700335	37 / 22
Carbonic anhydrase IV	CA4	P22748	CHEMBL3729	Lyase	0.12128700335	20 / 12
Insulin-like growth factor I receptor	IGF1R	P08069	CHEMBL1957	Kinase	0.12128700335	273 / 3
Insulin receptor	INSR	P06213	CHEMBL1981	Kinase	0.12128700335	95 / 1
ALK tyrosine kinase receptor	ALK	Q9UM73	CHEMBL4247	Kinase	0.12128700335	110 / 3
NADPH oxidase 4	NOX4	Q9NPH5	CHEMBL1250375	Enzyme	0.12128700335	25 / 7
Adenosine A2a receptor	ADORA2A	P29274	CHEMBL251	Family A G protein-coupled receptor	0.12128700335	708 / 10
Tyrosine-protein kinase SYK	SYK	P43405	CHEMBL2599	Kinase	0.113285953487	448 / 3
Hepatocyte growth factor receptor	MET	P08581	CHEMBL3717	Kinase	0.113285953487	673 / 4
Casein kinase II alpha	CSNK2A1	P68400	CHEMBL3629	Kinase	0.113285953487	55 / 2
Cyclin-dependent kinase 5/CDK5 activator 1	CDK5R1 CDK5	Q15078 Q00535	CHEMBL1907600	Kinase	0.113285953487	209 / 16
Cyclin-dependent kinase 1	CDK1	P06493	CHEMBL308	Kinase	0.113285953487	150 / 8
P-glycoprotein 1	ABCB1	P08183	CHEMBL4302	Primary active transporter	0.113285953487	115 / 47
Epidermal growth factor receptor erbB1	EGFR	P00533	CHEMBL203	Kinase	0.113285953487	668 / 25
Serine/threonine-protein kinase PLK1	PLK1	P53350	CHEMBL3024	Kinase	0.113285953487	141 / 3
Serine/threonine-protein kinase Aurora-B	AURKB	Q96GD4	CHEMBL2185	Kinase	0.113285953487	301 / 4
Vascular endothelial growth factor receptor 2	KDR	P35968	CHEMBL279	Kinase	0.113285953487	953 / 3
Tyrosine-protein kinase receptor FLT3	FLT3	P36888	CHEMBL1974	Kinase	0.113285953487	209 / 6
Beta amyloid A4 protein	APP	P05067	CHEMBL2487	Membrane receptor	0.113285953487	32 / 9
G-protein coupled receptor 35	GPR35	Q9HC97	CHEMBL1293267	Family A G protein-coupled receptor	0.113285953487	1 / 4
Poly [ADP-ribose] polymerase-1	PARP1	P09874	CHEMBL3105	Enzyme	0.113285953487	349 / 9
Tyrosine-protein kinase SRC	SRC	P12931	CHEMBL267	Kinase	0.113285953487	298 / 10
Serine/threonine-protein kinase PIM1	PIM1	P11309	CHEMBL2147	Kinase	0.113285953487	146 / 6
Thrombin	F2	P00734	CHEMBL204	Protease	0.113285953487	182 / 2
Carbonic anhydrase I	CA1	P00915	CHEMBL261	Lyase	0.113285953487	476 / 8
Carbonic anhydrase IX	CA9	Q16790	CHEMBL3594	Lyase	0.113285953487	323 / 7
Glycogen synthase kinase-3 beta	GSK3B	P49841	CHEMBL262	Kinase	0.113285953487	455 / 4
Matrix metalloproteinase 9	MMP9	P14780	CHEMBL321	Protease	0.113285953487	317 / 2
Carbonic anhydrase VI	CA6	P23280	CHEMBL3025	Lyase	0.113285953487	43 / 1
Carbonic anhydrase XIII	CA13	Q8N1Q1	CHEMBL3912	Lyase	0.113285953487	56 / 3
6-phosphofructo-2-kinase/fructose-2,6-bisphosphatase 3	PFKFB3	Q16875	CHEMBL2331053	Enzyme	0.113285953487	134 / 2
Matrix metalloproteinase 13	MMP13	P45452	CHEMBL280	Protease	0.113285953487	271 / 1
Beta-secretase 1	BACE1	P56817	CHEMBL4822	Protease	0.113285953487	349 / 12
PI3-kinase p110-gamma subunit	PIK3CG	P48736	CHEMBL3267	Enzyme	0.113285953487	306 / 1
Cyclin-dependent kinase 2	CDK2	P24941	CHEMBL301	Kinase	0.113285953487	336 / 10
Estrogen receptor beta	ESR2	Q92731	CHEMBL242	Nuclear receptor	0.113285953487	32 / 13
Xanthine dehydrogenase	XDH	P47989	CHEMBL1929	Oxidoreductase	0.113285953487	8 / 21
Cytochrome P450 19A1	CYP19A1	P11511	CHEMBL1978	Cytochrome P450	0.113285953487	131 / 18
Focal adhesion kinase 1	PTK2	Q05397	CHEMBL2695	Kinase	0.113285953487	151 / 2
Cyclin-dependent kinase 1/cyclin B	CCNB3 CDK1 CCNB1 CCNB2	Q8WWL7 P06493 P14635 O95067	CHEMBL2094127	Other cytosolic protein	0.113285953487	75 / 4
Matrix metalloproteinase 2	MMP2	P08253	CHEMBL333	Protease	0.113285953487	306 / 2
Dopamine D4 receptor	DRD4	P21917	CHEMBL219	Family A G protein-coupled receptor	0.113285953487	153 / 1
Serine/threonine-protein kinase NEK2	NEK2	P51955	CHEMBL3835	Kinase	0.113285953487	8 / 2
Tyrosine-protein kinase receptor UFO	AXL	P30530	CHEMBL4895	Kinase	0.113285953487	14 / 3
Cytochrome P450 1A1	CYP1A1	P04798	CHEMBL2231	Cytochrome P450	0.113285953487	15 / 7
Lymphocyte differentiation antigen CD38	CD38	P28907	CHEMBL4660	Enzyme	0.113285953487	20 / 3
Monoamine oxidase A	MAOA	P21397	CHEMBL1951	Oxidoreductase	0.113285953487	113 / 8
Glyoxalase I	GLO1	Q04760	CHEMBL2424	Enzyme	0.113285953487	0 / 4
Arginase-1 (by homology)	ARG1	P05089	CHEMBL1075097	Enzyme	0.113285953487	0 / 2
CaM kinase II beta	CAMK2B	Q13554	CHEMBL4121	Kinase	0.113285953487	1 / 1
Plasminogen	PLG	P00747	CHEMBL1801	Protease	0.113285953487	2 / 2
Arachidonate 12-lipoxygenase	ALOX12	P18054	CHEMBL3687	Enzyme	0.113285953487	0 / 5
Phospholipase A2 group 1B	PLA2G1B	P04054	CHEMBL4426	Enzyme	0.113285953487	0 / 1
DNA-(apurinic or apyrimidinic site) lyase	APEX1	P27695	CHEMBL5619	Enzyme	0.113285953487	0 / 1
Aldo-keto reductase family 1 member C1 (by homology)	AKR1C1	Q04828	CHEMBL5905	Enzyme	0.113285953487	0 / 1
Aldo-keto reductase family 1 member C4 (by homology)	AKR1C4	P17516	CHEMBL4999	Enzyme	0.113285953487	0 / 1
Acetylcholinesterase	ACHE	P22303	CHEMBL220	Hydrolase	0.113285953487	113 / 31
Carbonic anhydrase XIV	CA14	Q9ULX7	CHEMBL3510	Lyase	0.113285953487	30 / 1
Serine/threonine-protein kinase AKT	AKT1	P31749	CHEMBL4282	Kinase	0.113285953487	46 / 4
Carbonic anhydrase VA	CA5A	P35218	CHEMBL4789	Lyase	0.113285953487	14 / 1
Phospholipase A2 group IIA	PLA2G2A	P14555	CHEMBL3474	Enzyme	0.113285953487	12 / 2
Matrix metalloproteinase 12	MMP12	P39900	CHEMBL4393	Protease	0.113285953487	24 / 1
Receptor-type tyrosine-protein phosphatase S	PTPRS	Q13332	CHEMBL2396508	Phosphatase	0.113285953487	0 / 8
Induced myeloid leukemia cell differentiation protein Mcl-1	MCL1	Q07820	CHEMBL4361	Other cytosolic protein	0.113285953487	20 / 4
Tankyrase-1	TNKS	O95271	CHEMBL6164	Enzyme	0.113285953487	52 / 27
Vasopressin V2 receptor	AVPR2	P30518	CHEMBL1790	Family A G protein-coupled receptor	0.113285953487	85 / 1
Inhibitor of nuclear factor kappa B kinase beta subunit	IKBKB	O14920	CHEMBL1991	Kinase	0.113285953487	111 / 1
Ornithine decarboxylase	ODC1	P11926	CHEMBL1869	Lyase	0.113285953487	2 / 1
Serine/threonine-protein phosphatase	PPP5C	Q9BPW0	CHEMBL1293265	Phosphatase	0.113285953487	5 / 0
Estradiol 17-beta-dehydrogenase 2	HSD17B2	P37059	CHEMBL2789	Enzyme	0.113285953487	42 / 3
Tankyrase-2	TNKS2	Q9H2K2	CHEMBL6154	Enzyme	0.113285953487	36 / 12
Leucine-rich repeat serine/threonine-protein kinase 2	LRRK2	Q5S007	CHEMBL1075104	Kinase	0.113285953487	90 / 0
Aldo-keto-reductase family 1 member C3	AKR1C3	P42330	CHEMBL4681	Enzyme	0.113285953487	6 / 1
Matrix metalloproteinase 3	MMP3	P08254	CHEMBL283	Protease	0.113285953487	163 / 1
3-phosphoinositide dependent protein kinase-1	PDPK1	O15530	CHEMBL2534	Kinase	0.113285953487	147 / 0
Cannabinoid receptor 2	CNR2	P34972	CHEMBL253	Family A G protein-coupled receptor	0.113285953487	315 / 0
PI3-kinase p110-alpha subunit	PIK3CA	P42336	CHEMBL4005	Enzyme	0.113285953487	777 / 0
Cytochrome P450 1A2	CYP1A2	P05177	CHEMBL3356	Cytochrome P450	0.113285953487	3 / 8
NAD-dependent deacetylase sirtuin 3	SIRT3	Q9NTG7	CHEMBL4461	Eraser	0.113285953487	58 / 0
NAD-dependent deacetylase sirtuin 2	SIRT2	Q8IXJ6	CHEMBL4462	Eraser	0.113285953487	116 / 0
Cyclin-dependent kinase 4/cyclin D1	CCND1 CDK4	P24385 P11802	CHEMBL1907601	Kinase	0.113285953487	109 / 0
Acyl-CoA desaturase	SCD	O00767	CHEMBL5555	Enzyme	0.113285953487	73 / 0
11-beta-hydroxysteroid dehydrogenase 1	HSD11B1	P28845	CHEMBL4235	Enzyme	0.113285953487	210 / 0
AMY1C	AMY1A	P04745	CHEMBL2478	Enzyme	0.113285953487	0 / 1
Liver glycogen phosphorylase	PYGL	P06737	CHEMBL2568	Enzyme	0.113285953487	14 / 1
