# Supplementary material for: A Network Pharmacology-Based Study on Irritable Bowel Syndrome Prevention and Treatment Utilizing Shenling Baizhu Powder
Source: Biomed Res Int. 2021 Nov 23;2021:4579850. doi: 10.1155/2021/4579850 (PMC8632384; doi:10.1155/2021/4579850)
Supplement: Supplementary Materials — Please find detailed data in the supplementary file, including the original data of SymMap, metabolomics, and molecular docking of Shenling Baizhu powder. “Shenling Baizhu powder SymMap” includes all herbal targets and combined targets. “Shenling Baizhu powder metabolomics” includes two-dimensional structural data analysis. “Molecular docking” involves molecule-target docking and the results. [file 4579850.f1.zip › Data in brief/2. Shenling Baizhu powder Metabolomics/2D structure/69.csv]

Target	Common name	Uniprot ID	ChEMBL ID	Target Class	Probability*	Known actives (3D/2D)
Acetylcholinesterase	ACHE	P22303	CHEMBL220	Hydrolase	0.140333097536	157 / 59
Protein-tyrosine phosphatase 1B	PTPN1	P18031	CHEMBL335	Phosphatase	0.11573667475	61 / 12
Phosphodiesterase 4D	PDE4D	Q08499	CHEMBL288	Phosphodiesterase	0.11573667475	21 / 9
Aldehyde dehydrogenase	ALDH2	P05091	CHEMBL1935	Oxidoreductase	0.11573667475	15 / 37
Monoamine oxidase B	MAOB	P27338	CHEMBL2039	Oxidoreductase	0.11573667475	74 / 106
Plectin	PLEC	Q15149	CHEMBL1293240	Unclassified protein	0.11573667475	2 / 0
Matrix metalloproteinase 9	MMP9	P14780	CHEMBL321	Protease	0.11573667475	178 / 0
Matrix metalloproteinase 1	MMP1	P03956	CHEMBL332	Protease	0.11573667475	194 / 0
Matrix metalloproteinase 2	MMP2	P08253	CHEMBL333	Protease	0.11573667475	240 / 0
Acyl-CoA desaturase	SCD	O00767	CHEMBL5555	Enzyme	0.11573667475	47 / 0
Aldo-keto reductase family 1 member B10	AKR1B10	O60218	CHEMBL5983	Enzyme	0.11573667475	17 / 0
Serine/threonine-protein kinase Aurora-A	AURKA	O14965	CHEMBL4722	Kinase	0.11573667475	295 / 0
Acyl coenzyme A:cholesterol acyltransferase	CES1	P23141	CHEMBL2265	Enzyme	0.11573667475	8 / 0
Estradiol 17-beta-dehydrogenase 2	HSD17B2	P37059	CHEMBL2789	Enzyme	0.11573667475	48 / 1
Carboxylesterase 2	CES2	O00748	CHEMBL3180	Enzyme	0.11573667475	1 / 0
Protein farnesyltransferase	FNTA FNTB	P49354 P49356	CHEMBL2094108	Enzyme	0.11573667475	78 / 0
Ornithine decarboxylase	ODC1	P11926	CHEMBL1869	Lyase	0.11573667475	7 / 0
Dipeptidyl peptidase IV	DPP4	P27487	CHEMBL284	Protease	0.11573667475	253 / 0
Beta secretase 2	BACE2	Q9Y5Z0	CHEMBL2525	Protease	0.11573667475	26 / 0
Catechol O-methyltransferase	COMT	P21964	CHEMBL2023	Transferase	0.11573667475	2 / 0
Vanilloid receptor	TRPV1	Q8NER1	CHEMBL4794	Voltage-gated ion channel	0.11573667475	232 / 0
Glucagon receptor	GCGR	P47871	CHEMBL1985	Family B G protein-coupled receptor	0.11573667475	23 / 0
Pyruvate dehydrogenase kinase isoform 1	PDK1	Q15118	CHEMBL4766	Kinase	0.11573667475	69 / 0
Cytochrome P450 19A1	CYP19A1	P11511	CHEMBL1978	Cytochrome P450	0.11573667475	27 / 8
Histone deacetylase 1	HDAC1	Q13547	CHEMBL325	Eraser	0.11573667475	735 / 0
Serine/threonine-protein kinase/endoribonuclease IRE1	ERN1	O75460	CHEMBL1163101	Enzyme	0.11573667475	19 / 0
Epoxide hydratase	EPHX2	P34913	CHEMBL2409	Protease	0.11573667475	77 / 0
Phosphodiesterase 7A	PDE7A	Q13946	CHEMBL3012	Phosphodiesterase	0.11573667475	44 / 0
Serotonin 3a (5-HT3a) receptor (by homology)	HTR3A	P46098	CHEMBL1899	Ligand-gated ion channel	0.11573667475	19 / 0
Neuronal acetylcholine receptor protein alpha-7 subunit	CHRNA7	P36544	CHEMBL2492	Ligand-gated ion channel	0.11573667475	9 / 0
Rho-associated protein kinase 2	ROCK2	O75116	CHEMBL2973	Kinase	0.11573667475	259 / 0
Rho-associated protein kinase 1	ROCK1	Q13464	CHEMBL3231	Kinase	0.11573667475	87 / 0
Hematopoietic prostaglandin D synthase	HPGDS	O60760	CHEMBL5879	Transferase	0.11573667475	12 / 0
Matrix metalloproteinase 3	MMP3	P08254	CHEMBL283	Protease	0.11573667475	143 / 0
Serine/threonine-protein kinase TAO1	TAOK1	Q7L7X3	CHEMBL5261	Kinase	0.11573667475	7 / 0
Serine/threonine-protein kinase TAO3	TAOK3	Q9H2K8	CHEMBL5701	Kinase	0.11573667475	6 / 0
Inhibitor of nuclear factor kappa B kinase epsilon subunit	IKBKE	Q14164	CHEMBL3529	Kinase	0.11573667475	14 / 0
Serine/threonine-protein kinase TBK1	TBK1	Q9UHD2	CHEMBL5408	Kinase	0.11573667475	14 / 0
Histone deacetylase 6	HDAC6	Q9UBN7	CHEMBL1865	Eraser	0.11573667475	526 / 0
Carbonic anhydrase XII	CA12	O43570	CHEMBL3242	Lyase	0.11573667475	58 / 20
PI3-kinase p110-alpha subunit	PIK3CA	P42336	CHEMBL4005	Enzyme	0.11573667475	139 / 0
Histone deacetylase 3	HDAC3	O15379	CHEMBL1829	Eraser	0.11573667475	221 / 0
Hepatocyte growth factor receptor	MET	P08581	CHEMBL3717	Kinase	0.11573667475	124 / 0
Histone acetyltransferase p300	EP300	Q09472	CHEMBL3784	Writer	0.11573667475	7 / 0
Sphingosine 1-phosphate receptor Edg-3	S1PR3	Q99500	CHEMBL3892	Family A G protein-coupled receptor	0.11573667475	39 / 0
Sphingosine 1-phosphate receptor Edg-1	S1PR1	P21453	CHEMBL4333	Family A G protein-coupled receptor	0.11573667475	50 / 0
Peroxisome proliferator-activated receptor gamma	PPARG	P37231	CHEMBL235	Nuclear receptor	0.11573667475	13 / 2
Platelet activating factor receptor	PTAFR	P25105	CHEMBL250	Family A G protein-coupled receptor	0.11573667475	40 / 0
Exportin-1	XPO1	O14980	CHEMBL5661	Unclassified protein	0.11573667475	0 / 2
TGF-beta receptor type I	TGFBR1	P36897	CHEMBL4439	Kinase	0.11573667475	44 / 0
Activin receptor type-1 (by homology)	ACVR1	Q04771	CHEMBL5903	Kinase	0.11573667475	4 / 0
MAP kinase p38 alpha	MAPK14	Q16539	CHEMBL260	Kinase	0.11573667475	141 / 0
Vascular endothelial growth factor receptor 2	KDR	P35968	CHEMBL279	Kinase	0.11573667475	305 / 0
Cathepsin L	CTSL	P07711	CHEMBL3837	Protease	0.11573667475	31 / 0
Matrix metalloproteinase 13	MMP13	P45452	CHEMBL280	Protease	0.11573667475	138 / 0
Proto-oncogene tyrosine-protein kinase MER	MERTK	Q12866	CHEMBL5331	Kinase	0.11573667475	4 / 0
Adenosine A2b receptor	ADORA2B	P29275	CHEMBL255	Family A G protein-coupled receptor	0.11573667475	61 / 0
Cathepsin (B and K)	CTSB	P07858	CHEMBL4072	Protease	0.11573667475	34 / 0
Macrophage migration inhibitory factor	MIF	P14174	CHEMBL2085	Enzyme	0.11573667475	19 / 6
Ribosomal protein S6 kinase alpha 3	RPS6KA3	P51812	CHEMBL2345	Kinase	0.11573667475	18 / 0
Histone deacetylase 8	HDAC8	Q9BY41	CHEMBL3192	Eraser	0.11573667475	358 / 0
Sodium/glucose cotransporter 1	SLC5A1	P13866	CHEMBL4979	Electrochemical transporter	0.11573667475	200 / 0
Splicing factor 3B subunit 3	SF3B3	Q15393	CHEMBL1250378	Unclassified protein	0.11573667475	1 / 0
Histone deacetylase 2	HDAC2	Q92769	CHEMBL1937	Eraser	0.11573667475	276 / 0
Tyrosine-protein kinase receptor FLT3	FLT3	P36888	CHEMBL1974	Kinase	0.11573667475	59 / 0
Histone deacetylase 3/Nuclear receptor corepressor 2 (HDAC3/NCoR2)	NCOR2 HDAC3	Q9Y618 O15379	CHEMBL2111363	Eraser	0.11573667475	26 / 0
Histone deacetylase 5	HDAC5	Q9UQL6	CHEMBL2563	Eraser	0.11573667475	33 / 0
Histone deacetylase 7	HDAC7	Q8WUI4	CHEMBL2716	Eraser	0.11573667475	39 / 0
Histone deacetylase 3/NCoR1	NCOR1 HDAC3	O75376 O15379	CHEMBL3038484	Eraser	0.11573667475	3 / 0
Histone deacetylase 11	HDAC11	Q96DB2	CHEMBL3310	Eraser	0.11573667475	55 / 0
Histone deacetylase 4	HDAC4	P56524	CHEMBL3524	Eraser	0.11573667475	65 / 0
Coagulation factor VII/tissue factor	F3	P13726	CHEMBL4081	Surface antigen	0.11573667475	4 / 0
Histone deacetylase 9	HDAC9	Q9UKV0	CHEMBL4145	Eraser	0.11573667475	37 / 0
Histone deacetylase 10	HDAC10	Q969S8	CHEMBL5103	Eraser	0.11573667475	60 / 0
LIM domain kinase 1	LIMK1	P53667	CHEMBL3836	Kinase	0.11573667475	19 / 0
LIM domain kinase 2	LIMK2	P53671	CHEMBL5932	Kinase	0.11573667475	27 / 0
ADAM17	ADAM17	P78536	CHEMBL3706	Protease	0.11573667475	93 / 0
Phosphodiesterase 4A	PDE4A	P27815	CHEMBL254	Phosphodiesterase	0.11573667475	25 / 0
Phosphodiesterase 4B	PDE4B	Q07343	CHEMBL275	Phosphodiesterase	0.11573667475	41 / 0
Casein kinase I alpha	CSNK1A1	P48729	CHEMBL2793	Kinase	0.11573667475	6 / 0
Phosphodiesterase 4C	PDE4C	Q08493	CHEMBL291	Phosphodiesterase	0.11573667475	11 / 0
Maternal embryonic leucine zipper kinase	MELK	Q14680	CHEMBL4578	Kinase	0.11573667475	24 / 0
Sterol regulatory element-binding protein 2	SREBF2	Q12772	CHEMBL1795166	Unclassified protein	0.11573667475	3 / 0
FK506-binding protein 1A	FKBP1A	P62942	CHEMBL1902	Isomerase	0.11573667475	25 / 0
Bone morphogenetic protein 1	BMP1	P13497	CHEMBL3898	Protease	0.11573667475	88 / 0
15-hydroxyprostaglandin dehydrogenase [NAD+]	HPGD	P15428	CHEMBL1293255	Enzyme	0.11573667475	70 / 0
Serine/threonine-protein kinase 17B	STK17B	O94768	CHEMBL3980	Kinase	0.11573667475	6 / 0
Thromboxane A2 receptor	TBXA2R	P21731	CHEMBL2069	Family A G protein-coupled receptor	0.11573667475	9 / 0
Tyrosine-protein kinase SYK	SYK	P43405	CHEMBL2599	Kinase	0.11573667475	47 / 0
Vascular endothelial growth factor receptor 1	FLT1	P17948	CHEMBL1868	Kinase	0.11573667475	29 / 0
Equilibrative nucleoside transporter 1	SLC29A1	Q99808	CHEMBL1997	Electrochemical transporter	0.11573667475	37 / 0
Nitric oxide synthase, inducible (by homology)	NOS2	P35228	CHEMBL4481	Enzyme	0.11573667475	36 / 0
Serine/threonine-protein kinase PLK1	PLK1	P53350	CHEMBL3024	Kinase	0.11573667475	27 / 0
Vasopressin V2 receptor (by homology)	AVPR2	P30518	CHEMBL1790	Family A G protein-coupled receptor	0.11573667475	14 / 0
Mannose-6-phosphate isomerase	MPI	P34949	CHEMBL2758	Isomerase	0.11573667475	3 / 0
Perforin-1	PRF1	P14222	CHEMBL5480	Other ion channel	0.11573667475	20 / 0
Toll-like receptor (TLR7/TLR9)	TLR9	Q9NR96	CHEMBL5804	Toll-like and Il-1 receptors	0.11573667475	8 / 1
Dual specificity protein phosphatase 3	DUSP3	P51452	CHEMBL2635	Phosphatase	0.11573667475	10 / 0
Monoglyceride lipase	MGLL	Q99685	CHEMBL4191	Enzyme	0.11573667475	28 / 0
Muscarinic acetylcholine receptor M3	CHRM3	P20309	CHEMBL245	Family A G protein-coupled receptor	0.11573667475	61 / 0
