# Supplementary material for: A Network Pharmacology-Based Study on Irritable Bowel Syndrome Prevention and Treatment Utilizing Shenling Baizhu Powder
Source: Biomed Res Int. 2021 Nov 23;2021:4579850. doi: 10.1155/2021/4579850 (PMC8632384; doi:10.1155/2021/4579850)
Supplement: Supplementary Materials — Please find detailed data in the supplementary file, including the original data of SymMap, metabolomics, and molecular docking of Shenling Baizhu powder. “Shenling Baizhu powder SymMap” includes all herbal targets and combined targets. “Shenling Baizhu powder metabolomics” includes two-dimensional structural data analysis. “Molecular docking” involves molecule-target docking and the results. [file 4579850.f1.zip › Data in brief/2. Shenling Baizhu powder Metabolomics/2D structure/70.csv]

Target	Common name	Uniprot ID	ChEMBL ID	Target Class	Probability*	Known actives (3D/2D)
Signal transducer and activator of transcription 3	STAT3	P40763	CHEMBL4026	Transcription factor	0.12128700335	0 / 7
11-beta-hydroxysteroid dehydrogenase 2	HSD11B2	P80365	CHEMBL3746	Enzyme	0.113285953487	0 / 4
Nuclear receptor ROR-gamma	RORC	P51449	CHEMBL1741186	Nuclear receptor	0.113285953487	0 / 3
Sodium/potassium-transporting ATPase alpha-1 chain	ATP1A1	P05023	CHEMBL1807	Primary active transporter	0.113285953487	0 / 4
Adenosine kinase	ADK	P55263	CHEMBL3589	Enzyme	0.113285953487	120 / 0
11-beta-hydroxysteroid dehydrogenase 1	HSD11B1	P28845	CHEMBL4235	Enzyme	0.113285953487	1 / 6
Sodium/glucose cotransporter 2	SLC5A2	P31639	CHEMBL3884	Electrochemical transporter	0.113285953487	758 / 0
Interleukin-2	IL2	P60568	CHEMBL5880	Secreted protein	0.113285953487	0 / 1
Hexokinase type II	HK2	P52789	CHEMBL2640	Enzyme	0.113285953487	7 / 0
Hexokinase type I	HK1	P19367	CHEMBL2688	Enzyme	0.113285953487	6 / 0
Bifunctional protein NCOAT	OGA	O60502	CHEMBL5921	Enzyme	0.113285953487	46 / 0
Adenosine A3 receptor	ADORA3	P0DMS8	CHEMBL256	Family A G protein-coupled receptor	0.113285953487	364 / 0
Platelet activating factor receptor	PTAFR	P25105	CHEMBL250	Family A G protein-coupled receptor	0.113285953487	2 / 11
Adenosine A1 receptor	ADORA1	P30542	CHEMBL226	Family A G protein-coupled receptor	0.113285953487	722 / 0
Sodium/glucose cotransporter 1	SLC5A1	P13866	CHEMBL4979	Electrochemical transporter	0.113285953487	165 / 0
Adenosine A2a receptor	ADORA2A	P29274	CHEMBL251	Family A G protein-coupled receptor	0.113285953487	462 / 0
Heat shock cognate 71 kDa protein	HSPA8	P11142	CHEMBL1275223	Other cytosolic protein	0.113285953487	10 / 0
Muscle glycogen phosphorylase	PYGM	P11217	CHEMBL3526	Enzyme	0.113285953487	30 / 0
Glyceraldehyde-3-phosphate dehydrogenase liver	GAPDH	P04406	CHEMBL2284	Oxidoreductase	0.113285953487	7 / 0
Rhodopsin kinase	GRK1	Q15835	CHEMBL5607	Kinase	0.113285953487	1 / 0
Vascular endothelial growth factor A	VEGFA	P15692	CHEMBL1783	Secreted protein	0.113285953487	0 / 2
Acidic fibroblast growth factor	FGF1	P05230	CHEMBL2120	Secreted protein	0.113285953487	0 / 3
Basic fibroblast growth factor	FGF2	P09038	CHEMBL3107	Secreted protein	0.113285953487	0 / 2
Thymidine kinase, cytosolic	TK1	P04183	CHEMBL2883	Transferase	0.113285953487	9 / 0
Low affinity sodium-glucose cotransporter	SLC5A4	Q9NY91	CHEMBL1770047	Electrochemical transporter	0.113285953487	24 / 0
Sodium/nucleoside cotransporter 2	SLC28A2	O43868	CHEMBL5780	Electrochemical transporter	0.113285953487	15 / 0
Epidermal growth factor receptor erbB1	EGFR	P00533	CHEMBL203	Kinase	0.113285953487	12 / 0
78 kDa glucose-regulated protein	HSPA5	P11021	CHEMBL1781865	Unclassified protein	0.113285953487	9 / 0
Cyclin-dependent kinase 2/cyclin A	CDK2 CCNA1 CCNA2	P24941 P78396 P20248	CHEMBL2094128	Other cytosolic protein	0.113285953487	7 / 0
Adenosine A2b receptor	ADORA2B	P29275	CHEMBL255	Family A G protein-coupled receptor	0.113285953487	26 / 0
Androgen Receptor (by homology)	AR	P10275	CHEMBL1871	Nuclear receptor	0.113285953487	0 / 28
Adenosine deaminase	ADA	P00813	CHEMBL1910	Hydrolase	0.113285953487	10 / 0
Liver glycogen phosphorylase	PYGL	P06737	CHEMBL2568	Enzyme	0.113285953487	66 / 0
Proto-oncogene c-JUN	JUN	P05412	CHEMBL4977	Transcription factor	0.113285953487	0 / 5
Beta-glucocerebrosidase	GBA	P04062	CHEMBL2179	Enzyme	0.113285953487	22 / 0
Neprilysin	MME	P08473	CHEMBL1944	Protease	0.113285953487	49 / 0
Zinc finger protein GLI1	GLI1	P08151	CHEMBL5461	Transcription factor	0.113285953487	0 / 2
Equilibrative nucleoside transporter 1	SLC29A1	Q99808	CHEMBL1997	Electrochemical transporter	0.113285953487	96 / 0
Adenosylhomocysteinase	AHCY	P23526	CHEMBL2664	Enzyme	0.113285953487	61 / 0
Dual specificity mitogen-activated protein kinase kinase 1	MAP2K1	Q02750	CHEMBL3587	Kinase	0.113285953487	43 / 0
Tyrosinase	TYR	P14679	CHEMBL1973	Oxidoreductase	0.113285953487	8 / 0
Aldo-keto reductase family 1 member C1	AKR1C1	Q04828	CHEMBL5905	Enzyme	0.113285953487	3 / 0
Glutamate carboxypeptidase II	FOLH1	Q04609	CHEMBL1892	Protease	0.0	33 / 0
MAP kinase ERK2	MAPK1	P28482	CHEMBL4040	Kinase	0.0	4 / 0
Galectin-3	LGALS3	P17931	CHEMBL4531	Other cytosolic protein	0.0	8 / 3
6-O-methylguanine-DNA methyltransferase	MGMT	P16455	CHEMBL2864	Enzyme	0.0	2 / 0
Aldose reductase (by homology)	AKR1B1	P15121	CHEMBL1900	Enzyme	0.0	67 / 0
Neurotensin receptor 3	SORT1	Q99523	CHEMBL3091	Membrane receptor	0.0	10 / 0
Histone deacetylase 1	HDAC1	Q13547	CHEMBL325	Eraser	0.0	10 / 0
Sodium/myo-inositol cotransporter 2	SLC5A11	Q8WWX8	CHEMBL1744524	Electrochemical transporter	0.0	1 / 0
Alpha-L-fucosidase I	FUCA1	P04066	CHEMBL4176	Enzyme	0.0	32 / 0
Purine nucleoside phosphorylase	PNP	P00491	CHEMBL4338	Enzyme	0.0	68 / 0
Serine/threonine protein phosphatase PP1-gamma catalytic subunit	PPP1CC	P36873	CHEMBL4438	Phosphatase	0.0	0 / 2
Serine/threonine protein phosphatase 2A, catalytic subunit, alpha isoform	PPP2CA	P67775	CHEMBL4703	Phosphatase	0.0	0 / 4
Serine/threonine protein phosphatase 2A, 56 kDa regulatory subunit, alpha isoform	PPP2R5A	Q15172	CHEMBL4763	Phosphatase	0.0	0 / 1
Endothelin-converting enzyme 1	ECE1	P42892	CHEMBL4791	Protease	0.0	19 / 0
Cyclin-dependent kinase 1/cyclin B1	CDK1 CCNB1	P06493 P14635	CHEMBL1907602	Other cytosolic protein	0.0	2 / 0
Aldo-keto-reductase family 1 member C3	AKR1C3	P42330	CHEMBL4681	Enzyme	0.0	26 / 0
Aldo-keto reductase family 1 member C2	AKR1C2	P52895	CHEMBL5847	Enzyme	0.0	18 / 0
Proteinase-activated receptor 2	F2RL1	P55085	CHEMBL5963	Family A G protein-coupled receptor	0.0	0 / 1
c-Jun N-terminal kinase 3	MAPK10	P53779	CHEMBL2637	Kinase	0.0	2 / 0
Apoptosis regulator Bcl-X	BCL2L1	Q07817	CHEMBL4625	Other ion channel	0.0	3 / 2
Gamma-secretase	PSEN2 PSENEN NCSTN APH1A PSEN1 APH1B	P49810 Q9NZ42 Q92542 Q96BI3 P49768 Q8WW43	CHEMBL2094135	Protease	0.0	0 / 5
Beta-mannosidase	MANBA	O00462	CHEMBL3903	Enzyme	0.0	2 / 0
Glutathione S-transferase Pi	GSTP1	P09211	CHEMBL3902	Enzyme	0.0	3 / 0
Induced myeloid leukemia cell differentiation protein Mcl-1	MCL1	Q07820	CHEMBL4361	Other cytosolic protein	0.0	8 / 0
Glutathione S-transferase Mu 2	GSTM2	P28161	CHEMBL4589	Enzyme	0.0	3 / 0
6-phosphofructo-2-kinase/fructose-2,6-bisphosphatase 3	PFKFB3	Q16875	CHEMBL2331053	Enzyme	0.0	9 / 0
Thrombin	F2	P00734	CHEMBL204	Protease	0.0	6 / 6
Cytidine deaminase	CDA	P32320	CHEMBL4502	Enzyme	0.0	22 / 0
Matrix metalloproteinase 9	MMP9	P14780	CHEMBL321	Protease	0.0	21 / 1
Alpha-2a adrenergic receptor	ADRA2A	P08913	CHEMBL1867	Family A G protein-coupled receptor	0.0	0 / 1
Adrenergic receptor alpha-2	ADRA2C	P18825	CHEMBL1916	Family A G protein-coupled receptor	0.0	0 / 1
Alpha-2b adrenergic receptor	ADRA2B	P18089	CHEMBL1942	Family A G protein-coupled receptor	0.0	0 / 1
Dopamine D1 receptor	DRD1	P21728	CHEMBL2056	Family A G protein-coupled receptor	0.0	0 / 1
Dopamine D2 receptor	DRD2	P14416	CHEMBL217	Family A G protein-coupled receptor	0.0	0 / 1
Alpha-1d adrenergic receptor	ADRA1D	P25100	CHEMBL223	Family A G protein-coupled receptor	0.0	0 / 1
Serotonin 2a (5-HT2a) receptor	HTR2A	P28223	CHEMBL224	Family A G protein-coupled receptor	0.0	0 / 1
Alpha-1a adrenergic receptor (by homology)	ADRA1A	P35348	CHEMBL229	Family A G protein-coupled receptor	0.0	0 / 3
Dopamine D3 receptor	DRD3	P35462	CHEMBL234	Family A G protein-coupled receptor	0.0	0 / 1
Cytochrome P450 2D6	CYP2D6	P10635	CHEMBL289	Cytochrome P450	0.0	0 / 1
Serotonin 6 (5-HT6) receptor	HTR6	P50406	CHEMBL3371	Family A G protein-coupled receptor	0.0	0 / 1
Serotonin 1b (5-HT1b) receptor (by homology)	HTR1B	P28222	CHEMBL1898	Family A G protein-coupled receptor	0.0	0 / 1
Serine/threonine-protein kinase/endoribonuclease IRE1	ERN1	O75460	CHEMBL1163101	Enzyme	0.0	3 / 0
Beta-galactosidase	GLB1	P16278	CHEMBL2522	Hydrolase	0.0	3 / 0
Uridine phosphorylase 1 (by homology)	UPP1	Q16831	CHEMBL4811	Enzyme	0.0	14 / 0
Glutamate receptor ionotropic kainate 1	GRIK1	P39086	CHEMBL1918	Ligand-gated ion channel	0.0	13 / 0
Vitronectin receptor alpha	ITGAV	P06756	CHEMBL3660	Membrane receptor	0.0	14 / 0
Protein-tyrosine phosphatase 1B	PTPN1	P18031	CHEMBL335	Phosphatase	0.0	20 / 23
D-amino-acid oxidase	DAO	P14920	CHEMBL5485	Enzyme	0.0	7 / 0
DNA (cytosine-5)-methyltransferase 1	DNMT1	P26358	CHEMBL1993	Writer	0.0	3 / 0
Dipeptidyl peptidase IV	DPP4	P27487	CHEMBL284	Protease	0.0	2 / 0
MAP kinase p38 alpha	MAPK14	Q16539	CHEMBL260	Kinase	0.0	5 / 0
Fructose-1,6-bisphosphatase	FBP1	P09467	CHEMBL3975	Enzyme	0.0	20 / 0
Peptidyl-prolyl cis-trans isomerase NIMA-interacting 1	PIN1	Q13526	CHEMBL2288	Enzyme	0.0	6 / 0
Matrix metalloproteinase 13	MMP13	P45452	CHEMBL280	Protease	0.0	9 / 0
Matrix metalloproteinase 1	MMP1	P03956	CHEMBL332	Protease	0.0	18 / 0
Matrix metalloproteinase 7	MMP7	P09237	CHEMBL4073	Protease	0.0	5 / 0
Matrix metalloproteinase 12	MMP12	P39900	CHEMBL4393	Protease	0.0	8 / 0
Matrix metalloproteinase 8	MMP8	P22894	CHEMBL4588	Protease	0.0	15 / 0
