# Supplementary material for: A Network Pharmacology-Based Study on Irritable Bowel Syndrome Prevention and Treatment Utilizing Shenling Baizhu Powder
Source: Biomed Res Int. 2021 Nov 23;2021:4579850. doi: 10.1155/2021/4579850 (PMC8632384; doi:10.1155/2021/4579850)
Supplement: Supplementary Materials — Please find detailed data in the supplementary file, including the original data of SymMap, metabolomics, and molecular docking of Shenling Baizhu powder. “Shenling Baizhu powder SymMap” includes all herbal targets and combined targets. “Shenling Baizhu powder metabolomics” includes two-dimensional structural data analysis. “Molecular docking” involves molecule-target docking and the results. [file 4579850.f1.zip › Data in brief/2. Shenling Baizhu powder Metabolomics/2D structure/71.csv]

Target	Common name	Uniprot ID	ChEMBL ID	Target Class	Probability*	Known actives (3D/2D)
Delta opioid receptor	OPRD1	P41143	CHEMBL236	Family A G protein-coupled receptor	0.591260490229	16 / 5
ATP-binding cassette sub-family G member 2	ABCG2	Q9UNQ0	CHEMBL5393	Primary active transporter	0.509208197213	37 / 49
Aldose reductase (by homology)	AKR1B1	P15121	CHEMBL1900	Enzyme	0.38630102447	33 / 68
Mu opioid receptor (by homology)	OPRM1	P35372	CHEMBL233	Family A G protein-coupled receptor	0.16491211304	22 / 1
Arachidonate 5-lipoxygenase	ALOX5	P09917	CHEMBL215	Oxidoreductase	0.156708108187	70 / 47
Cytochrome P450 1B1	CYP1B1	Q16678	CHEMBL4878	Cytochrome P450	0.123936621366	10 / 46
Xanthine dehydrogenase	XDH	P47989	CHEMBL1929	Oxidoreductase	0.123936621366	1 / 21
Stem cell growth factor receptor	KIT	P10721	CHEMBL1936	Kinase	0.123936621366	20 / 2
Cyclooxygenase-2	PTGS2	P35354	CHEMBL230	Oxidoreductase	0.123936621366	33 / 25
Beta amyloid A4 protein	APP	P05067	CHEMBL2487	Membrane receptor	0.123936621366	10 / 9
Carbonic anhydrase II	CA2	P00918	CHEMBL205	Lyase	0.11573667475	154 / 17
Adenosine A1 receptor	ADORA1	P30542	CHEMBL226	Family A G protein-coupled receptor	0.11573667475	68 / 22
Carbonic anhydrase XII	CA12	O43570	CHEMBL3242	Lyase	0.11573667475	101 / 19
Nitric oxide synthase, inducible (by homology)	NOS2	P35228	CHEMBL4481	Enzyme	0.11573667475	22 / 3
NADPH oxidase 4	NOX4	Q9NPH5	CHEMBL1250375	Enzyme	0.11573667475	9 / 7
Plasminogen	PLG	P00747	CHEMBL1801	Protease	0.11573667475	14 / 2
Adenosine A2a receptor	ADORA2A	P29274	CHEMBL251	Family A G protein-coupled receptor	0.11573667475	51 / 10
Carbonic anhydrase VII	CA7	P43166	CHEMBL2326	Lyase	0.11573667475	16 / 17
Telomerase reverse transcriptase	TERT	O14746	CHEMBL2916	Enzyme	0.11573667475	13 / 22
Adenosine A3 receptor	ADORA3	P0DMS8	CHEMBL256	Family A G protein-coupled receptor	0.11573667475	49 / 20
Cyclin-dependent kinase 1	CDK1	P06493	CHEMBL308	Kinase	0.11573667475	45 / 8
Serine/threonine-protein kinase PIM1	PIM1	P11309	CHEMBL2147	Kinase	0.11573667475	18 / 6
Carbonic anhydrase IV	CA4	P22748	CHEMBL3729	Lyase	0.11573667475	6 / 12
Epidermal growth factor receptor erbB1	EGFR	P00533	CHEMBL203	Kinase	0.11573667475	128 / 25
Phospholipase A2 group IIA	PLA2G2A	P14555	CHEMBL3474	Enzyme	0.11573667475	0 / 2
Multidrug resistance-associated protein 1	ABCC1	P33527	CHEMBL3004	Primary active transporter	0.11573667475	6 / 11
Serine/threonine-protein kinase Aurora-B	AURKB	Q96GD4	CHEMBL2185	Kinase	0.11573667475	42 / 4
Matrix metalloproteinase 13	MMP13	P45452	CHEMBL280	Protease	0.11573667475	387 / 1
Matrix metalloproteinase 3	MMP3	P08254	CHEMBL283	Protease	0.11573667475	305 / 1
Matrix metalloproteinase 9	MMP9	P14780	CHEMBL321	Protease	0.11573667475	521 / 2
Matrix metalloproteinase 2	MMP2	P08253	CHEMBL333	Protease	0.11573667475	454 / 2
Estradiol 17-beta-dehydrogenase 2	HSD17B2	P37059	CHEMBL2789	Enzyme	0.11573667475	61 / 3
Beta-secretase 1	BACE1	P56817	CHEMBL4822	Protease	0.11573667475	265 / 12
Induced myeloid leukemia cell differentiation protein Mcl-1	MCL1	Q07820	CHEMBL4361	Other cytosolic protein	0.11573667475	16 / 4
Cyclin-dependent kinase 2	CDK2	P24941	CHEMBL301	Kinase	0.11573667475	82 / 10
Lysine-specific demethylase 4D-like	KDM4E	B2RXH2	CHEMBL1293226	Eraser	0.11573667475	0 / 2
G-protein coupled receptor 35	GPR35	Q9HC97	CHEMBL1293267	Family A G protein-coupled receptor	0.11573667475	0 / 4
Glyoxalase I	GLO1	Q04760	CHEMBL2424	Enzyme	0.11573667475	0 / 4
Myeloperoxidase	MPO	P05164	CHEMBL2439	Enzyme	0.11573667475	0 / 1
Carbonic anhydrase III	CA3	P07451	CHEMBL2885	Lyase	0.11573667475	0 / 1
Arachidonate 12-lipoxygenase	ALOX12	P18054	CHEMBL3687	Enzyme	0.11573667475	0 / 6
DNA-(apurinic or apyrimidinic site) lyase	APEX1	P27695	CHEMBL5619	Enzyme	0.11573667475	0 / 1
Aldo-keto reductase family 1 member C2 (by homology)	AKR1C2	P52895	CHEMBL5847	Enzyme	0.11573667475	0 / 1
Aldo-keto reductase family 1 member C1 (by homology)	AKR1C1	Q04828	CHEMBL5905	Enzyme	0.11573667475	0 / 1
Aldo-keto-reductase family 1 member C3 (by homology)	AKR1C3	P42330	CHEMBL4681	Enzyme	0.11573667475	0 / 1
Aldo-keto reductase family 1 member C4 (by homology)	AKR1C4	P17516	CHEMBL4999	Enzyme	0.11573667475	0 / 1
Aldehyde reductase (by homology)	AKR1A1	P14550	CHEMBL2246	Enzyme	0.11573667475	0 / 1
6-phosphofructo-2-kinase/fructose-2,6-bisphosphatase 3	PFKFB3	Q16875	CHEMBL2331053	Enzyme	0.11573667475	9 / 2
Tyrosine-protein kinase SYK	SYK	P43405	CHEMBL2599	Kinase	0.11573667475	105 / 3
Arachidonate 15-lipoxygenase	ALOX15	P16050	CHEMBL2903	Enzyme	0.11573667475	10 / 5
Cytochrome P450 1A1	CYP1A1	P04798	CHEMBL2231	Cytochrome P450	0.11573667475	0 / 7
Receptor-type tyrosine-protein phosphatase S	PTPRS	Q13332	CHEMBL2396508	Phosphatase	0.11573667475	0 / 8
Monoamine oxidase A	MAOA	P21397	CHEMBL1951	Oxidoreductase	0.11573667475	15 / 7
Poly [ADP-ribose] polymerase-1	PARP1	P09874	CHEMBL3105	Enzyme	0.11573667475	35 / 9
Lymphocyte differentiation antigen CD38	CD38	P28907	CHEMBL4660	Enzyme	0.11573667475	0 / 3
DNA topoisomerase I (by homology)	TOP1	P11387	CHEMBL1781	Isomerase	0.11573667475	0 / 1
Arginase-1 (by homology)	ARG1	P05089	CHEMBL1075097	Enzyme	0.11573667475	0 / 2
Carbonic anhydrase I	CA1	P00915	CHEMBL261	Lyase	0.11573667475	148 / 9
Carbonic anhydrase IX	CA9	Q16790	CHEMBL3594	Lyase	0.11573667475	108 / 8
Hepatocyte growth factor receptor	MET	P08581	CHEMBL3717	Kinase	0.11573667475	143 / 4
Acetylcholinesterase	ACHE	P22303	CHEMBL220	Hydrolase	0.11573667475	21 / 32
Vascular endothelial growth factor receptor 2	KDR	P35968	CHEMBL279	Kinase	0.11573667475	201 / 3
Glycogen synthase kinase-3 beta	GSK3B	P49841	CHEMBL262	Kinase	0.11573667475	89 / 4
Aldo-keto reductase family 1 member B10	AKR1B10	O60218	CHEMBL5983	Enzyme	0.11573667475	13 / 3
Estrogen receptor beta	ESR2	Q92731	CHEMBL242	Nuclear receptor	0.11573667475	51 / 14
PI3-kinase p110-gamma subunit	PIK3CG	P48736	CHEMBL3267	Enzyme	0.11573667475	48 / 1
Thrombin	F2	P00734	CHEMBL204	Protease	0.11573667475	160 / 2
Tyrosine-protein kinase receptor FLT3	FLT3	P36888	CHEMBL1974	Kinase	0.11573667475	56 / 6
Estradiol 17-beta-dehydrogenase 1	HSD17B1	P14061	CHEMBL3181	Enzyme	0.11573667475	58 / 3
P-glycoprotein 1	ABCB1	P08183	CHEMBL4302	Primary active transporter	0.11573667475	28 / 47
Serine/threonine-protein kinase AKT	AKT1	P31749	CHEMBL4282	Kinase	0.11573667475	7 / 4
Ornithine decarboxylase	ODC1	P11926	CHEMBL1869	Lyase	0.11573667475	0 / 1
Carbonic anhydrase VI	CA6	P23280	CHEMBL3025	Lyase	0.11573667475	9 / 1
Carbonic anhydrase XIV	CA14	Q9ULX7	CHEMBL3510	Lyase	0.11573667475	7 / 1
Carbonic anhydrase XIII (by homology)	CA13	Q8N1Q1	CHEMBL3912	Lyase	0.11573667475	10 / 4
Carbonic anhydrase VA	CA5A	P35218	CHEMBL4789	Lyase	0.11573667475	4 / 1
AMY1C	AMY1A	P04745	CHEMBL2478	Enzyme	0.11573667475	0 / 1
G protein-coupled receptor kinase 6	GRK6	P43250	CHEMBL6144	Kinase	0.11573667475	0 / 4
Tyrosine-protein kinase SRC	SRC	P12931	CHEMBL267	Kinase	0.11573667475	53 / 10
Myosin light chain kinase, smooth muscle	MYLK	Q15746	CHEMBL2428	Kinase	0.11573667475	4 / 1
Aryl hydrocarbon receptor	AHR	P35869	CHEMBL3201	Transcription factor	0.11573667475	0 / 1
Estrogen-related receptor alpha	ESRRA	P11474	CHEMBL3429	Nuclear receptor	0.11573667475	0 / 1
DNA topoisomerase II alpha	TOP2A	P11388	CHEMBL1806	Isomerase	0.11573667475	1 / 1
Matrix metalloproteinase 12	MMP12	P39900	CHEMBL4393	Protease	0.11573667475	27 / 1
Cyclin-dependent kinase 1/cyclin B	CCNB3 CDK1 CCNB1 CCNB2	Q8WWL7 P06493 P14635 O95067	CHEMBL2094127	Other cytosolic protein	0.11573667475	17 / 4
Interleukin-8 receptor A	CXCR1	P25024	CHEMBL4029	Family A G protein-coupled receptor	0.11573667475	6 / 1
Transthyretin	TTR	P02766	CHEMBL3194	Secreted protein	0.11573667475	1 / 3
Serine/threonine-protein kinase PLK1	PLK1	P53350	CHEMBL3024	Kinase	0.11573667475	43 / 3
DNA-3-methyladenine glycosylase	MPG	P29372	CHEMBL3396943	Enzyme	0.11573667475	0 / 1
Solute carrier family 22 member 12	SLC22A12	Q96S37	CHEMBL6120	Electrochemical transporter	0.11573667475	0 / 1
PI3-kinase p85-alpha subunit	PIK3R1	P27986	CHEMBL2506	Enzyme	0.11573667475	1 / 1
Focal adhesion kinase 1	PTK2	Q05397	CHEMBL2695	Kinase	0.11573667475	30 / 2
Dopamine D4 receptor	DRD4	P21917	CHEMBL219	Family A G protein-coupled receptor	0.11573667475	8 / 1
Phospholipase A2 group 1B	PLA2G1B	P04054	CHEMBL4426	Enzyme	0.11573667475	1 / 1
Tyrosine-protein kinase receptor UFO	AXL	P30530	CHEMBL4895	Kinase	0.11573667475	4 / 3
Insulin-like growth factor I receptor	IGF1R	P08069	CHEMBL1957	Kinase	0.11573667475	35 / 3
Casein kinase II alpha	CSNK2A1	P68400	CHEMBL3629	Kinase	0.11573667475	10 / 2
Cyclin-dependent kinase 4	CDK4	P11802	CHEMBL331	Kinase	0.11573667475	30 / 0
Cyclin-dependent kinase 5/CDK5 activator 1	CDK5R1 CDK5	Q15078 Q00535	CHEMBL1907600	Kinase	0.11573667475	39 / 16
Cytochrome P450 1A2	CYP1A2	P05177	CHEMBL3356	Cytochrome P450	0.11573667475	1 / 8
