# Supplementary material for: A Network Pharmacology-Based Study on Irritable Bowel Syndrome Prevention and Treatment Utilizing Shenling Baizhu Powder
Source: Biomed Res Int. 2021 Nov 23;2021:4579850. doi: 10.1155/2021/4579850 (PMC8632384; doi:10.1155/2021/4579850)
Supplement: Supplementary Materials — Please find detailed data in the supplementary file, including the original data of SymMap, metabolomics, and molecular docking of Shenling Baizhu powder. “Shenling Baizhu powder SymMap” includes all herbal targets and combined targets. “Shenling Baizhu powder metabolomics” includes two-dimensional structural data analysis. “Molecular docking” involves molecule-target docking and the results. [file 4579850.f1.zip › Data in brief/2. Shenling Baizhu powder Metabolomics/2D structure/72.csv]

Target	Common name	Uniprot ID	ChEMBL ID	Target Class	Probability*	Known actives (3D/2D)
ATP-binding cassette sub-family G member 2	ABCG2	Q9UNQ0	CHEMBL5393	Primary active transporter	0.306239351562	38 / 11
Estrogen receptor alpha	ESR1	P03372	CHEMBL206	Nuclear receptor	0.297456494222	123 / 72
Estrogen receptor beta	ESR2	Q92731	CHEMBL242	Nuclear receptor	0.297456494222	99 / 67
Cytochrome P450 19A1	CYP19A1	P11511	CHEMBL1978	Cytochrome P450	0.271107241944	71 / 48
Carboxylesterase 2	CES2	O00748	CHEMBL3180	Enzyme	0.236049336727	0 / 1
Phospholipase A2 group 1B	PLA2G1B	P04054	CHEMBL4426	Enzyme	0.192104608146	1 / 1
Acyl coenzyme A:cholesterol acyltransferase	CES1	P23141	CHEMBL2265	Enzyme	0.139523430439	6 / 1
Butyrylcholinesterase	BCHE	P06276	CHEMBL1914	Hydrolase	0.121986395249	47 / 2
Peroxisome proliferator-activated receptor gamma	PPARG	P37231	CHEMBL235	Nuclear receptor	0.121986395249	8 / 75
Acetylcholinesterase	ACHE	P22303	CHEMBL220	Hydrolase	0.121986395249	107 / 7
Retinoid X receptor alpha	RXRA	P19793	CHEMBL2061	Nuclear receptor	0.0956634871844	1 / 8
Estradiol 17-beta-dehydrogenase 1	HSD17B1	P14061	CHEMBL3181	Enzyme	0.0956634871844	111 / 1
Beta-secretase 1	BACE1	P56817	CHEMBL4822	Protease	0.0	420 / 14
Carbonic anhydrase XII	CA12	O43570	CHEMBL3242	Lyase	0.0	89 / 6
Cyclooxygenase-1	PTGS1	P23219	CHEMBL221	Oxidoreductase	0.0	38 / 15
Testis-specific androgen-binding protein	SHBG	P04278	CHEMBL3305	Secreted protein	0.0	2 / 1
Carbonic anhydrase VII	CA7	P43166	CHEMBL2326	Lyase	0.0	19 / 7
Sodium/glucose cotransporter 2	SLC5A2	P31639	CHEMBL3884	Electrochemical transporter	0.0	3 / 4
Adenosine A1 receptor	ADORA1	P30542	CHEMBL226	Family A G protein-coupled receptor	0.0	91 / 3
Monoamine oxidase B	MAOB	P27338	CHEMBL2039	Oxidoreductase	0.0	61 / 99
Adenosine A3 receptor	ADORA3	P0DMS8	CHEMBL256	Family A G protein-coupled receptor	0.0	30 / 2
Cathepsin L	CTSL	P07711	CHEMBL3837	Protease	0.0	78 / 2
Cytochrome P450 1B1	CYP1B1	Q16678	CHEMBL4878	Cytochrome P450	0.0	9 / 6
Carbonic anhydrase IV	CA4	P22748	CHEMBL3729	Lyase	0.0	11 / 7
Carbonyl reductase [NADPH] 1	CBR1	P16152	CHEMBL5586	Enzyme	0.0	2 / 1
Matrix metalloproteinase 13	MMP13	P45452	CHEMBL280	Protease	0.0	366 / 1
Metabotropic glutamate receptor 5	GRM5	P41594	CHEMBL3227	Family C G protein-coupled receptor	0.0	72 / 9
Multidrug resistance-associated protein 1	ABCC1	P33527	CHEMBL3004	Primary active transporter	0.0	1 / 2
Thymidylate synthase	TYMS	P04818	CHEMBL1952	Transferase	0.0	32 / 0
DNA polymerase beta (by homology)	POLB	P06746	CHEMBL2392	Enzyme	0.0	0 / 3
Protein-tyrosine phosphatase 1B	PTPN1	P18031	CHEMBL335	Phosphatase	0.0	28 / 25
Phospholipase A2 group V	PLA2G5	P39877	CHEMBL4323	Enzyme	0.0	0 / 3
Group X secretory phospholipase A2	PLA2G10	O15496	CHEMBL4342	Enzyme	0.0	0 / 1
Ornithine decarboxylase	ODC1	P11926	CHEMBL1869	Lyase	0.0	0 / 6
Matrix metalloproteinase 12	MMP12	P39900	CHEMBL4393	Protease	0.0	29 / 2
Taste receptor type 2 member 31	TAS2R31	P59538	CHEMBL2034804	Taste family G protein-coupled receptor	0.0	1 / 3
Estradiol 17-beta-dehydrogenase 2	HSD17B2	P37059	CHEMBL2789	Enzyme	0.0	103 / 0
P2X purinoceptor 7	P2RX7	Q99572	CHEMBL4805	Ligand-gated ion channel	0.0	75 / 0
11-beta-hydroxysteroid dehydrogenase 1	HSD11B1	P28845	CHEMBL4235	Enzyme	0.0	170 / 0
Matrix metalloproteinase 3	MMP3	P08254	CHEMBL283	Protease	0.0	348 / 0
Kallikrein 2	KLK2	P20151	CHEMBL2442	Protease	0.0	0 / 1
Presequence protease, mitochondrial	PITRM1	Q5JRX3	CHEMBL3124731	Enzyme	0.0	2 / 0
PI3-kinase p110-delta subunit	PIK3CD	O00329	CHEMBL3130	Enzyme	0.0	85 / 0
PI3-kinase p110-alpha subunit	PIK3CA	P42336	CHEMBL4005	Enzyme	0.0	236 / 0
GABA receptor alpha-1 subunit	GABRA1	P14867	CHEMBL1962	Ligand-gated ion channel	0.0	19 / 0
GABA receptor alpha-3 subunit	GABRA3	P34903	CHEMBL3026	Ligand-gated ion channel	0.0	11 / 0
GABA receptor alpha-2 subunit	GABRA2	P47869	CHEMBL4956	Ligand-gated ion channel	0.0	16 / 0
GABA receptor alpha-5 subunit	GABRA5	P31644	CHEMBL5112	Ligand-gated ion channel	0.0	8 / 0
Glycogen synthase kinase-3 beta	GSK3B	P49841	CHEMBL262	Kinase	0.0	132 / 0
Calcitonin gene-related peptide type 1 receptor	CALCRL	Q16602	CHEMBL3798	Family B G protein-coupled receptor	0.0	143 / 0
Heat shock protein HSP 90-beta	HSP90AB1	P08238	CHEMBL4303	Other cytosolic protein	0.0	114 / 0
Poly [ADP-ribose] polymerase-1	PARP1	P09874	CHEMBL3105	Enzyme	0.0	152 / 0
N-acylsphingosine-amidohydrolase	NAAA	Q02083	CHEMBL4349	Enzyme	0.0	4 / 0
Tyrosine-protein kinase JAK1	JAK1	P23458	CHEMBL2835	Kinase	0.0	81 / 0
Equilibrative nucleoside transporter 1	SLC29A1	Q99808	CHEMBL1997	Electrochemical transporter	0.0	10 / 0
Serine/threonine-protein kinase mTOR	MTOR	P42345	CHEMBL2842	Kinase	0.0	207 / 0
Pyruvate dehydrogenase kinase isoform 1	PDK1	Q15118	CHEMBL4766	Kinase	0.0	179 / 0
Gastrin releasing peptide receptor	GRPR	P30550	CHEMBL4959	Family A G protein-coupled receptor	0.0	10 / 0
Kappa Opioid receptor	OPRK1	P41145	CHEMBL237	Family A G protein-coupled receptor	0.0	61 / 0
Bradykinin B1 receptor	BDKRB1	P46663	CHEMBL4308	Family A G protein-coupled receptor	0.0	57 / 0
ADAM17	ADAM17	P78536	CHEMBL3706	Protease	0.0	300 / 0
Neuronal acetylcholine receptor protein alpha-7 subunit	CHRNA7	P36544	CHEMBL2492	Ligand-gated ion channel	0.0	16 / 0
Matrix metalloproteinase 1	MMP1	P03956	CHEMBL332	Protease	0.0	546 / 0
Ephrin receptor	EPHB4	P54760	CHEMBL5147	Kinase	0.0	25 / 0
Metabotropic glutamate receptor 2	GRM2	Q14416	CHEMBL5137	Family C G protein-coupled receptor	0.0	16 / 71
Receptor protein-tyrosine kinase erbB-2	ERBB2	P04626	CHEMBL1824	Kinase	0.0	84 / 0
Tyrosine-protein kinase ITK/TSK	ITK	Q08881	CHEMBL2959	Kinase	0.0	65 / 0
Heat shock protein HSP 90-alpha	HSP90AA1	P07900	CHEMBL3880	Other cytosolic protein	0.0	85 / 0
Epoxide hydratase	EPHX2	P34913	CHEMBL2409	Protease	0.0	43 / 0
Nitric-oxide synthase, brain	NOS1	P29475	CHEMBL3568	Enzyme	0.0	16 / 0
Bone morphogenetic protein 1	BMP1	P13497	CHEMBL3898	Protease	0.0	103 / 0
Bile acid receptor FXR	NR1H4	Q96RI1	CHEMBL2047	Nuclear receptor	0.0	17 / 17
Histamine H4 receptor	HRH4	Q9H3N8	CHEMBL3759	Family A G protein-coupled receptor	0.0	19 / 0
Cholecystokinin B receptor	CCKBR	P32239	CHEMBL298	Family A G protein-coupled receptor	0.0	117 / 0
Fatty acid synthase	FASN	P49327	CHEMBL4158	Transferase	0.0	33 / 0
Plasminogen activator inhibitor-1	SERPINE1	P05121	CHEMBL3475	Secreted protein	0.0	4 / 3
Cyclin-dependent kinase 2/cyclin A	CDK2 CCNA1 CCNA2	P24941 P78396 P20248	CHEMBL2094128	Other cytosolic protein	0.0	56 / 0
C3a anaphylatoxin chemotactic receptor	C3AR1	Q16581	CHEMBL4761	Family A G protein-coupled receptor	0.0	17 / 0
Histone deacetylase 2	HDAC2	Q92769	CHEMBL1937	Eraser	0.0	85 / 0
Complement factor D	CFD	P00746	CHEMBL2176771	Protease	0.0	109 / 0
Neuropeptide Y receptor type 1	NPY1R	P25929	CHEMBL4777	Family A G protein-coupled receptor	0.0	22 / 0
Tyrosine-protein kinase ABL	ABL1	P00519	CHEMBL1862	Kinase	0.0	88 / 0
Ephrin type-A receptor 2	EPHA2	P29317	CHEMBL2068	Kinase	0.0	2 / 0
Tyrosine-protein kinase LCK	LCK	P06239	CHEMBL258	Kinase	0.0	73 / 0
Ephrin type-B receptor 2	EPHB2	P29323	CHEMBL3290	Kinase	0.0	2 / 0
Ephrin type-A receptor 5	EPHA5	P54756	CHEMBL3987	Kinase	0.0	2 / 0
Ephrin type-A receptor 4	EPHA4	P54764	CHEMBL3988	Kinase	0.0	2 / 0
Ephrin type-A receptor 8	EPHA8	P29322	CHEMBL4134	Kinase	0.0	1 / 0
Ephrin type-A receptor 7	EPHA7	Q15375	CHEMBL4602	Kinase	0.0	1 / 0
Ephrin type-B receptor 3	EPHB3	P54753	CHEMBL4901	Kinase	0.0	2 / 0
Ephrin type-A receptor 3	EPHA3	P29320	CHEMBL4954	Kinase	0.0	2 / 0
Ephrin type-B receptor 1	EPHB1	P54762	CHEMBL5072	Kinase	0.0	1 / 0
Ephrin type-A receptor 1	EPHA1	P21709	CHEMBL5810	Kinase	0.0	2 / 0
Carnitine O-palmitoyltransferase 1, liver isoform	CPT1A	P50416	CHEMBL1293194	Enzyme	0.0	38 / 0
Dopamine D1 receptor	DRD1	P21728	CHEMBL2056	Family A G protein-coupled receptor	0.0	77 / 0
Carnitine palmitoyltransferase 2	CPT2	P23786	CHEMBL3238	Enzyme	0.0	4 / 0
Serine/threonine-protein kinase Aurora-A	AURKA	O14965	CHEMBL4722	Kinase	0.0	171 / 0
Serine/threonine-protein kinase B-raf	BRAF	P15056	CHEMBL5145	Kinase	0.0	151 / 0
Tyrosine-protein kinase JAK3	JAK3	P52333	CHEMBL2148	Kinase	0.0	126 / 0
Type-1 angiotensin II receptor (by homology)	AGTR1	P30556	CHEMBL227	Family A G protein-coupled receptor	0.0	23 / 0
