# Supplementary material for: A Network Pharmacology-Based Study on Irritable Bowel Syndrome Prevention and Treatment Utilizing Shenling Baizhu Powder
Source: Biomed Res Int. 2021 Nov 23;2021:4579850. doi: 10.1155/2021/4579850 (PMC8632384; doi:10.1155/2021/4579850)
Supplement: Supplementary Materials — Please find detailed data in the supplementary file, including the original data of SymMap, metabolomics, and molecular docking of Shenling Baizhu powder. “Shenling Baizhu powder SymMap” includes all herbal targets and combined targets. “Shenling Baizhu powder metabolomics” includes two-dimensional structural data analysis. “Molecular docking” involves molecule-target docking and the results. [file 4579850.f1.zip › Data in brief/2. Shenling Baizhu powder Metabolomics/2D structure/73.csv]

Target	Common name	Uniprot ID	ChEMBL ID	Target Class	Probability*	Known actives (3D/2D)
ATP-binding cassette sub-family G member 2	ABCG2	Q9UNQ0	CHEMBL5393	Primary active transporter	1.0	73 / 49
Aldose reductase	AKR1B1	P15121	CHEMBL1900	Enzyme	0.288654610346	15 / 68
Cytochrome P450 1B1	CYP1B1	Q16678	CHEMBL4878	Cytochrome P450	0.2798670472	17 / 46
Delta opioid receptor (by homology)	OPRD1	P41143	CHEMBL236	Family A G protein-coupled receptor	0.236049336727	15 / 5
Stem cell growth factor receptor	KIT	P10721	CHEMBL1936	Kinase	0.157071962631	84 / 2
Mu opioid receptor	OPRM1	P35372	CHEMBL233	Family A G protein-coupled receptor	0.13075915194	38 / 1
NADPH oxidase 4	NOX4	Q9NPH5	CHEMBL1250375	Enzyme	0.104440650707	19 / 7
Carbonic anhydrase II	CA2	P00918	CHEMBL205	Lyase	0.104440650707	276 / 17
Arachidonate 5-lipoxygenase	ALOX5	P09917	CHEMBL215	Oxidoreductase	0.104440650707	61 / 47
Nitric oxide synthase, inducible	NOS2	P35228	CHEMBL4481	Enzyme	0.0956634871844	57 / 3
Cyclooxygenase-2	PTGS2	P35354	CHEMBL230	Oxidoreductase	0.0956634871844	89 / 21
Adenosine A1 receptor	ADORA1	P30542	CHEMBL226	Family A G protein-coupled receptor	0.0956634871844	514 / 22
Adenosine A2a receptor	ADORA2A	P29274	CHEMBL251	Family A G protein-coupled receptor	0.0956634871844	521 / 10
Adenosine A3 receptor	ADORA3	P0DMS8	CHEMBL256	Family A G protein-coupled receptor	0.0956634871844	329 / 20
Carbonic anhydrase XII	CA12	O43570	CHEMBL3242	Lyase	0.0	193 / 19
Carbonic anhydrase VII	CA7	P43166	CHEMBL2326	Lyase	0.0	43 / 17
Serine/threonine-protein kinase PLK1	PLK1	P53350	CHEMBL3024	Kinase	0.0	104 / 3
Telomerase reverse transcriptase	TERT	O14746	CHEMBL2916	Enzyme	0.0	24 / 22
Beta amyloid A4 protein	APP	P05067	CHEMBL2487	Membrane receptor	0.0	31 / 9
Hepatocyte growth factor receptor	MET	P08581	CHEMBL3717	Kinase	0.0	539 / 4
Multidrug resistance-associated protein 1	ABCC1	P33527	CHEMBL3004	Primary active transporter	0.0	14 / 11
6-phosphofructo-2-kinase/fructose-2,6-bisphosphatase 3	PFKFB3	Q16875	CHEMBL2331053	Enzyme	0.0	135 / 2
Carbonic anhydrase I	CA1	P00915	CHEMBL261	Lyase	0.0	260 / 9
Epidermal growth factor receptor erbB1	EGFR	P00533	CHEMBL203	Kinase	0.0	394 / 25
Tyrosine-protein kinase SYK	SYK	P43405	CHEMBL2599	Kinase	0.0	330 / 3
Tyrosine-protein kinase SRC	SRC	P12931	CHEMBL267	Kinase	0.0	184 / 10
Tyrosine-protein kinase receptor FLT3	FLT3	P36888	CHEMBL1974	Kinase	0.0	161 / 6
Vascular endothelial growth factor receptor 2	KDR	P35968	CHEMBL279	Kinase	0.0	714 / 3
Plasminogen	PLG	P00747	CHEMBL1801	Protease	0.0	1 / 2
Carbonic anhydrase IV	CA4	P22748	CHEMBL3729	Lyase	0.0	5 / 12
Cyclin-dependent kinase 1	CDK1	P06493	CHEMBL308	Kinase	0.0	103 / 8
Matrix metalloproteinase 13	MMP13	P45452	CHEMBL280	Protease	0.0	113 / 1
Poly [ADP-ribose] polymerase-1	PARP1	P09874	CHEMBL3105	Enzyme	0.0	215 / 9
Acetylcholinesterase	ACHE	P22303	CHEMBL220	Hydrolase	0.0	67 / 30
Glycogen synthase kinase-3 beta	GSK3B	P49841	CHEMBL262	Kinase	0.0	278 / 4
CaM kinase II beta	CAMK2B	Q13554	CHEMBL4121	Kinase	0.0	1 / 1
PI3-kinase p110-gamma subunit	PIK3CG	P48736	CHEMBL3267	Enzyme	0.0	197 / 1
Insulin receptor	INSR	P06213	CHEMBL1981	Kinase	0.0	74 / 1
Serine/threonine-protein kinase Aurora-B	AURKB	Q96GD4	CHEMBL2185	Kinase	0.0	214 / 4
P-glycoprotein 1	ABCB1	P08183	CHEMBL4302	Primary active transporter	0.0	86 / 47
Focal adhesion kinase 1	PTK2	Q05397	CHEMBL2695	Kinase	0.0	109 / 2
Xanthine dehydrogenase	XDH	P47989	CHEMBL1929	Oxidoreductase	0.0	3 / 21
Serine/threonine-protein kinase NEK2	NEK2	P51955	CHEMBL3835	Kinase	0.0	5 / 2
ALK tyrosine kinase receptor	ALK	Q9UM73	CHEMBL4247	Kinase	0.0	67 / 3
Beta-secretase 1	BACE1	P56817	CHEMBL4822	Protease	0.0	217 / 12
Serine/threonine-protein kinase PIM1	PIM1	P11309	CHEMBL2147	Kinase	0.0	49 / 6
DNA topoisomerase II alpha	TOP2A	P11388	CHEMBL1806	Isomerase	0.0	0 / 1
Thrombin	F2	P00734	CHEMBL204	Protease	0.0	131 / 2
Glyoxalase I	GLO1	Q04760	CHEMBL2424	Enzyme	0.0	0 / 4
Carbonic anhydrase III	CA3	P07451	CHEMBL2885	Lyase	0.0	0 / 1
Protein kinase N1	PKN1	Q16512	CHEMBL3384	Kinase	0.0	0 / 2
Casein kinase II alpha	CSNK2A1	P68400	CHEMBL3629	Kinase	0.0	32 / 2
Serine/threonine-protein kinase NEK6	NEK6	Q9HC98	CHEMBL4309	Kinase	0.0	0 / 2
DNA-(apurinic or apyrimidinic site) lyase	APEX1	P27695	CHEMBL5619	Enzyme	0.0	0 / 1
Aldo-keto reductase family 1 member C2 (by homology)	AKR1C2	P52895	CHEMBL5847	Enzyme	0.0	0 / 1
Aldo-keto reductase family 1 member C1 (by homology)	AKR1C1	Q04828	CHEMBL5905	Enzyme	0.0	0 / 1
Aldo-keto reductase family 1 member C4 (by homology)	AKR1C4	P17516	CHEMBL4999	Enzyme	0.0	0 / 1
Aldehyde reductase (by homology)	AKR1A1	P14550	CHEMBL2246	Enzyme	0.0	0 / 1
Dopamine D4 receptor	DRD4	P21917	CHEMBL219	Family A G protein-coupled receptor	0.0	86 / 1
Receptor-type tyrosine-protein phosphatase S	PTPRS	Q13332	CHEMBL2396508	Phosphatase	0.0	0 / 8
Induced myeloid leukemia cell differentiation protein Mcl-1	MCL1	Q07820	CHEMBL4361	Other cytosolic protein	0.0	11 / 4
Carbonic anhydrase IX	CA9	Q16790	CHEMBL3594	Lyase	0.0	189 / 8
Cyclin-dependent kinase 2	CDK2	P24941	CHEMBL301	Kinase	0.0	224 / 10
Matrix metalloproteinase 2	MMP2	P08253	CHEMBL333	Protease	0.0	99 / 2
Cyclin-dependent kinase 5/CDK5 activator 1	CDK5R1 CDK5	Q15078 Q00535	CHEMBL1907600	Kinase	0.0	145 / 12
DNA topoisomerase I (by homology)	TOP1	P11387	CHEMBL1781	Isomerase	0.0	0 / 1
Arginase-1 (by homology)	ARG1	P05089	CHEMBL1075097	Enzyme	0.0	0 / 2
Carbonic anhydrase VI	CA6	P23280	CHEMBL3025	Lyase	0.0	30 / 1
Carbonic anhydrase XIII	CA13	Q8N1Q1	CHEMBL3912	Lyase	0.0	35 / 4
Matrix metalloproteinase 9	MMP9	P14780	CHEMBL321	Protease	0.0	92 / 2
Insulin-like growth factor I receptor	IGF1R	P08069	CHEMBL1957	Kinase	0.0	171 / 3
Cyclin-dependent kinase 1/cyclin B	CCNB3 CDK1 CCNB1 CCNB2	Q8WWL7 P06493 P14635 O95067	CHEMBL2094127	Other cytosolic protein	0.0	37 / 4
Cytochrome P450 19A1	CYP19A1	P11511	CHEMBL1978	Cytochrome P450	0.0	47 / 18
Monoamine oxidase A	MAOA	P21397	CHEMBL1951	Oxidoreductase	0.0	64 / 7
Tyrosine-protein kinase receptor UFO	AXL	P30530	CHEMBL4895	Kinase	0.0	15 / 3
Cytochrome P450 1A1	CYP1A1	P04798	CHEMBL2231	Cytochrome P450	0.0	10 / 7
Serine/threonine-protein kinase AKT	AKT1	P31749	CHEMBL4282	Kinase	0.0	34 / 4
Cytochrome P450 1A2	CYP1A2	P05177	CHEMBL3356	Cytochrome P450	0.0	4 / 8
Matrix metalloproteinase 3	MMP3	P08254	CHEMBL283	Protease	0.0	34 / 1
Estradiol 17-beta-dehydrogenase 2	HSD17B2	P37059	CHEMBL2789	Enzyme	0.0	30 / 3
Estrogen receptor beta	ESR2	Q92731	CHEMBL242	Nuclear receptor	0.0	18 / 13
G-protein coupled receptor 35	GPR35	Q9HC97	CHEMBL1293267	Family A G protein-coupled receptor	0.0	1 / 4
Vasopressin V2 receptor	AVPR2	P30518	CHEMBL1790	Family A G protein-coupled receptor	0.0	49 / 1
AMY1C	AMY1A	P04745	CHEMBL2478	Enzyme	0.0	0 / 1
G protein-coupled receptor kinase 6	GRK6	P43250	CHEMBL6144	Kinase	0.0	0 / 4
Tyrosinase	TYR	P14679	CHEMBL1973	Oxidoreductase	0.0	0 / 2
Aryl hydrocarbon receptor	AHR	P35869	CHEMBL3201	Transcription factor	0.0	0 / 1
Tankyrase-1	TNKS	O95271	CHEMBL6164	Enzyme	0.0	25 / 27
Phospholipase A2 group IIA	PLA2G2A	P14555	CHEMBL3474	Enzyme	0.0	4 / 2
Carbonic anhydrase XIV	CA14	Q9ULX7	CHEMBL3510	Lyase	0.0	13 / 1
Inhibitor of nuclear factor kappa B kinase beta subunit	IKBKB	O14920	CHEMBL1991	Kinase	0.0	77 / 1
Liver glycogen phosphorylase	PYGL	P06737	CHEMBL2568	Enzyme	0.0	9 / 1
Matrix metalloproteinase 12	MMP12	P39900	CHEMBL4393	Protease	0.0	8 / 1
Aldo-keto-reductase family 1 member C3	AKR1C3	P42330	CHEMBL4681	Enzyme	0.0	2 / 1
Platelet-derived growth factor receptor beta	PDGFRB	P09619	CHEMBL1913	Kinase	0.0	146 / 0
Kinesin-1 heavy chain/ Tyrosine-protein kinase receptor RET	RET	P07949	CHEMBL2041	Kinase	0.0	67 / 0
Tubulin beta-1 chain	TUBB1	Q9H4B7	CHEMBL1915	Structural protein	0.0	19 / 0
Myosin light chain kinase, smooth muscle	MYLK	Q15746	CHEMBL2428	Kinase	0.0	7 / 1
DNA-3-methyladenine glycosylase	MPG	P29372	CHEMBL3396943	Enzyme	0.0	0 / 1
Microtubule-associated protein tau	MAPT	P10636	CHEMBL1293224	Unclassified protein	0.0	3 / 1
