# Supplementary material for: A Network Pharmacology-Based Study on Irritable Bowel Syndrome Prevention and Treatment Utilizing Shenling Baizhu Powder
Source: Biomed Res Int. 2021 Nov 23;2021:4579850. doi: 10.1155/2021/4579850 (PMC8632384; doi:10.1155/2021/4579850)
Supplement: Supplementary Materials — Please find detailed data in the supplementary file, including the original data of SymMap, metabolomics, and molecular docking of Shenling Baizhu powder. “Shenling Baizhu powder SymMap” includes all herbal targets and combined targets. “Shenling Baizhu powder metabolomics” includes two-dimensional structural data analysis. “Molecular docking” involves molecule-target docking and the results. [file 4579850.f1.zip › Data in brief/2. Shenling Baizhu powder Metabolomics/2D structure/74.csv]

Target	Common name	Uniprot ID	ChEMBL ID	Target Class	Probability*	Known actives (3D/2D)
Dynamin-1	DNM1	Q05193	CHEMBL4958	Enzyme	0.106165761464	10 / 14
Epidermal growth factor receptor erbB1	EGFR	P00533	CHEMBL203	Kinase	0.106165761464	55 / 64
Monoamine oxidase B	MAOB	P27338	CHEMBL2039	Oxidoreductase	0.106165761464	1 / 20
Butyrylcholinesterase	BCHE	P06276	CHEMBL1914	Hydrolase	0.106165761464	11 / 21
Acetylcholinesterase	ACHE	P22303	CHEMBL220	Hydrolase	0.106165761464	17 / 25
C-C chemokine receptor type 2	CCR2	P41597	CHEMBL4015	Family A G protein-coupled receptor	0.106165761464	15 / 44
Methionine aminopeptidase 2	METAP2	P50579	CHEMBL3922	Protease	0.106165761464	0 / 15
Matrix metalloproteinase 2	MMP2	P08253	CHEMBL333	Protease	0.106165761464	33 / 76
Matrix metalloproteinase 9	MMP9	P14780	CHEMBL321	Protease	0.106165761464	13 / 65
Matrix metalloproteinase 1	MMP1	P03956	CHEMBL332	Protease	0.106165761464	9 / 63
Dihydropteridine reductase	QDPR	P09417	CHEMBL3730	Enzyme	0.106165761464	0 / 8
Cyclooxygenase-2	PTGS2	P35354	CHEMBL230	Oxidoreductase	0.106165761464	2 / 42
Dopamine D2 receptor	DRD2	P14416	CHEMBL217	Family A G protein-coupled receptor	0.106165761464	109 / 79
Dopamine D3 receptor	DRD3	P35462	CHEMBL234	Family A G protein-coupled receptor	0.106165761464	97 / 72
Thrombin and coagulation factor X	F10	P00742	CHEMBL244	Protease	0.106165761464	121 / 0
Histone acetyltransferase p300	EP300	Q09472	CHEMBL3784	Writer	0.106165761464	0 / 11
ADAM17	ADAM17	P78536	CHEMBL3706	Protease	0.106165761464	28 / 0
DNA polymerase beta (by homology)	POLB	P06746	CHEMBL2392	Enzyme	0.106165761464	3 / 0
Liver glycogen phosphorylase	PYGL	P06737	CHEMBL2568	Enzyme	0.106165761464	0 / 6
Somatostatin receptor 1	SSTR1	P30872	CHEMBL1917	Family A G protein-coupled receptor	0.0	10 / 0
Somatostatin receptor 3	SSTR3	P32745	CHEMBL2028	Family A G protein-coupled receptor	0.0	23 / 0
SUMO-activating enzyme	SAE1 UBA2	Q9UBE0 Q9UBT2	CHEMBL2095174	Enzyme	0.0	1 / 0
Tyrosine-protein kinase ABL	ABL1	P00519	CHEMBL1862	Kinase	0.0	15 / 0
Tyrosine-protein kinase Lyn	LYN	P07948	CHEMBL3905	Kinase	0.0	2 / 0
Fibroblast growth factor receptor 2	FGFR2	P21802	CHEMBL4142	Kinase	0.0	3 / 0
Histone deacetylase 3/Nuclear receptor corepressor 2 (HDAC3/NCoR2)	NCOR2 HDAC3	Q9Y618 O15379	CHEMBL2111363	Eraser	0.0	9 / 0
Histone deacetylase 11	HDAC11	Q96DB2	CHEMBL3310	Eraser	0.0	10 / 0
Serotonin 4 (5-HT4) receptor	HTR4	Q13639	CHEMBL1875	Family A G protein-coupled receptor	0.0	11 / 0
Arachidonate 5-lipoxygenase	ALOX5	P09917	CHEMBL215	Oxidoreductase	0.0	3 / 28
Cytochrome P450 2C9	CYP2C9	P11712	CHEMBL3397	Cytochrome P450	0.0	0 / 1
Cytochrome P450 2C19	CYP2C19	P33261	CHEMBL3622	Cytochrome P450	0.0	0 / 1
Anandamide amidohydrolase	FAAH	O00519	CHEMBL2243	Enzyme	0.0	7 / 0
Protein kinase C gamma	PRKCG	P05129	CHEMBL2938	Kinase	0.0	1 / 0
MAP/microtubule affinity-regulating kinase 2	MARK2	Q7KZI7	CHEMBL3831	Kinase	0.0	1 / 0
Bone morphogenetic protein 1	BMP1	P13497	CHEMBL3898	Protease	0.0	8 / 0
Urotensin II receptor	UTS2R	Q9UKP6	CHEMBL3764	Family A G protein-coupled receptor	0.0	11 / 0
Thyroid stimulating hormone receptor	TSHR	P16473	CHEMBL1963	Family A G protein-coupled receptor	0.0	2 / 0
Receptor protein-tyrosine kinase erbB-2	ERBB2	P04626	CHEMBL1824	Kinase	0.0	27 / 10
Hepatic lipase	LIPC	P11150	CHEMBL2127	Enzyme	0.0	14 / 0
Vascular endothelial growth factor receptor 2	KDR	P35968	CHEMBL279	Kinase	0.0	52 / 5
Ghrelin receptor	GHSR	Q92847	CHEMBL4616	Family A G protein-coupled receptor	0.0	15 / 0
Tyrosine-protein kinase JAK3	JAK3	P52333	CHEMBL2148	Kinase	0.0	23 / 0
TNF-alpha	TNF	P01375	CHEMBL1825	Secreted protein	0.0	23 / 0
Lysyl-tRNA synthetase	KARS	Q15046	CHEMBL5575	Enzyme	0.0	1 / 0
Prostanoid EP2 receptor	PTGER2	P43116	CHEMBL1881	Family A G protein-coupled receptor	0.0	3 / 0
Glycine transporter 2	SLC6A5	Q9Y345	CHEMBL3060	Electrochemical transporter	0.0	12 / 0
Oxytocin receptor	OXTR	P30559	CHEMBL2049	Family A G protein-coupled receptor	0.0	6 / 0
Neurokinin 2 receptor	TACR2	P21452	CHEMBL2327	Family A G protein-coupled receptor	0.0	8 / 0
Neurokinin 1 receptor	TACR1	P25103	CHEMBL249	Family A G protein-coupled receptor	0.0	14 / 0
Neurokinin 3 receptor	TACR3	P29371	CHEMBL4429	Family A G protein-coupled receptor	0.0	2 / 0
Matrix metalloproteinase 16	MMP16	P51512	CHEMBL2200	Protease	0.0	1 / 0
Matrix metalloproteinase 13	MMP13	P45452	CHEMBL280	Protease	0.0	9 / 0
Matrix metalloproteinase 14	MMP14	P50281	CHEMBL3869	Protease	0.0	6 / 0
Coagulation factor VII	F7	P08709	CHEMBL3991	Protease	0.0	9 / 0
Matrix metalloproteinase 8	MMP8	P22894	CHEMBL4588	Protease	0.0	11 / 0
Nuclear receptor subfamily 4 group A member 1	NR4A1	P22736	CHEMBL1293229	Nuclear receptor	0.0	1 / 0
Macrophage colony stimulating factor receptor	CSF1R	P07333	CHEMBL1844	Kinase	0.0	15 / 0
Platelet-derived growth factor receptor beta	PDGFRB	P09619	CHEMBL1913	Kinase	0.0	7 / 0
Platelet-derived growth factor receptor alpha	PDGFRA	P16234	CHEMBL2007	Kinase	0.0	2 / 0
Nerve growth factor receptor Trk-A	NTRK1	P04629	CHEMBL2815	Kinase	0.0	5 / 0
Neurotrophic tyrosine kinase receptor type 2	NTRK2	Q16620	CHEMBL4898	Kinase	0.0	4 / 0
Sodium/hydrogen exchanger 1 (by homology)	SLC9A1	P19634	CHEMBL2781	Electrochemical transporter	0.0	8 / 0
Tyrosine-protein kinase BRK	PTK6	Q13882	CHEMBL4601	Kinase	0.0	26 / 0
Coagulation factor XI	F11	P03951	CHEMBL2820	Protease	0.0	15 / 0
Cannabinoid receptor 2	CNR2	P34972	CHEMBL253	Family A G protein-coupled receptor	0.0	11 / 10
Plasma kallikrein	KLKB1	P03952	CHEMBL2000	Protease	0.0	8 / 0
Vitamin K-dependent protein C	PROC	P04070	CHEMBL4444	Protease	0.0	5 / 0
Metabotropic glutamate receptor 2	GRM2	Q14416	CHEMBL5137	Family C G protein-coupled receptor	0.0	8 / 0
Histamine H1 receptor	HRH1	P35367	CHEMBL231	Family A G protein-coupled receptor	0.0	5 / 0
C-C chemokine receptor type 3	CCR3	P51677	CHEMBL3473	Family A G protein-coupled receptor	0.0	8 / 0
Estradiol 17-beta-dehydrogenase 2	HSD17B2	P37059	CHEMBL2789	Enzyme	0.0	3 / 1
Estradiol 17-beta-dehydrogenase 1	HSD17B1	P14061	CHEMBL3181	Enzyme	0.0	3 / 2
Inosine-5'-monophosphate dehydrogenase 1	IMPDH1	P20839	CHEMBL1822	Oxidoreductase	0.0	5 / 0
NAD-dependent deacetylase sirtuin 3	SIRT3	Q9NTG7	CHEMBL4461	Eraser	0.0	2 / 0
Lysine-specific demethylase 5C	KDM5C	P41229	CHEMBL2163176	Eraser	0.0	4 / 0
Lysine-specific demethylase 4B	KDM4B	O94953	CHEMBL3313832	Eraser	0.0	4 / 0
Lysine-specific demethylase 5B	KDM5B	Q9UGL1	CHEMBL3774295	Eraser	0.0	4 / 0
Lysine-specific demethylase 4A	KDM4A	O75164	CHEMBL5896	Eraser	0.0	4 / 0
Carbonic anhydrase VII	CA7	P43166	CHEMBL2326	Lyase	0.0	3 / 6
Carbonic anhydrase I	CA1	P00915	CHEMBL261	Lyase	0.0	8 / 10
Carbonic anhydrase VI	CA6	P23280	CHEMBL3025	Lyase	0.0	2 / 6
Carbonic anhydrase XII	CA12	O43570	CHEMBL3242	Lyase	0.0	2 / 12
Carbonic anhydrase XIV	CA14	Q9ULX7	CHEMBL3510	Lyase	0.0	3 / 5
Carbonic anhydrase IX	CA9	Q16790	CHEMBL3594	Lyase	0.0	6 / 13
Carbonic anhydrase VA	CA5A	P35218	CHEMBL4789	Lyase	0.0	3 / 5
Rho-associated protein kinase 2	ROCK2	O75116	CHEMBL2973	Kinase	0.0	34 / 0
Melatonin receptor 1A	MTNR1A	P48039	CHEMBL1945	Family A G protein-coupled receptor	0.0	2 / 23
Melatonin receptor 1B	MTNR1B	P49286	CHEMBL1946	Family A G protein-coupled receptor	0.0	2 / 22
Caspase-3	CASP3	P42574	CHEMBL2334	Protease	0.0	4 / 0
Caspase-6	CASP6	P55212	CHEMBL3308	Protease	0.0	3 / 0
Caspase-7	CASP7	P55210	CHEMBL3468	Protease	0.0	3 / 0
Calcitonin gene-related peptide type 1 receptor	CALCRL	Q16602	CHEMBL3798	Family B G protein-coupled receptor	0.0	5 / 0
Cathepsin L	CTSL	P07711	CHEMBL3837	Protease	0.0	10 / 0
Serine/threonine-protein kinase Chk1	CHEK1	O14757	CHEMBL4630	Kinase	0.0	34 / 0
Caspase-1	CASP1	P29466	CHEMBL4801	Protease	0.0	3 / 0
Squalene monooxygenase (by homology)	SQLE	Q14534	CHEMBL3592	Enzyme	0.0	3 / 0
Somatostatin receptor 2 (by homology)	SSTR2	P30874	CHEMBL1804	Family A G protein-coupled receptor	0.0	2 / 0
Cystinyl aminopeptidase	LNPEP	Q9UIQ6	CHEMBL2693	Protease	0.0	6 / 0
Cholecystokinin A receptor (by homology)	CCKAR	P32238	CHEMBL1901	Family A G protein-coupled receptor	0.0	2 / 0
Cholecystokinin B receptor	CCKBR	P32239	CHEMBL298	Family A G protein-coupled receptor	0.0	5 / 0
