# Supplementary material for: A Network Pharmacology-Based Study on Irritable Bowel Syndrome Prevention and Treatment Utilizing Shenling Baizhu Powder
Source: Biomed Res Int. 2021 Nov 23;2021:4579850. doi: 10.1155/2021/4579850 (PMC8632384; doi:10.1155/2021/4579850)
Supplement: Supplementary Materials — Please find detailed data in the supplementary file, including the original data of SymMap, metabolomics, and molecular docking of Shenling Baizhu powder. “Shenling Baizhu powder SymMap” includes all herbal targets and combined targets. “Shenling Baizhu powder metabolomics” includes two-dimensional structural data analysis. “Molecular docking” involves molecule-target docking and the results. [file 4579850.f1.zip › Data in brief/2. Shenling Baizhu powder Metabolomics/2D structure/76.csv]

Target	Common name	Uniprot ID	ChEMBL ID	Target Class	Probability*	Known actives (3D/2D)
Aldehyde dehydrogenase	ALDH2	P05091	CHEMBL1935	Oxidoreductase	1.0	4 / 37
Interleukin-2	IL2	P60568	CHEMBL5880	Secreted protein	1.0	3 / 5
TNF-alpha	TNF	P01375	CHEMBL1825	Secreted protein	0.38940029876	3 / 3
Adenosine A1 receptor	ADORA1	P30542	CHEMBL226	Family A G protein-coupled receptor	0.106165761464	128 / 2
Carbonic anhydrase I	CA1	P00915	CHEMBL261	Lyase	0.106165761464	74 / 15
Carbonic anhydrase XII	CA12	O43570	CHEMBL3242	Lyase	0.106165761464	55 / 19
Carbonic anhydrase IX	CA9	Q16790	CHEMBL3594	Lyase	0.106165761464	61 / 11
Carbonic anhydrase II	CA2	P00918	CHEMBL205	Lyase	0.106165761464	75 / 15
Aldose reductase	AKR1B1	P15121	CHEMBL1900	Enzyme	0.106165761464	10 / 19
Heat shock protein HSP 90-alpha	HSP90AA1	P07900	CHEMBL3880	Other cytosolic protein	0.106165761464	7 / 0
Protein kinase C alpha	PRKCA	P17252	CHEMBL299	Kinase	0.106165761464	2 / 0
Xanthine dehydrogenase	XDH	P47989	CHEMBL1929	Oxidoreductase	0.106165761464	0 / 9
Adenosine A3 receptor	ADORA3	P0DMS8	CHEMBL256	Family A G protein-coupled receptor	0.106165761464	54 / 0
Coagulation factor VII/tissue factor	F3	P13726	CHEMBL4081	Surface antigen	0.106165761464	4 / 0
Equilibrative nucleoside transporter 1	SLC29A1	Q99808	CHEMBL1997	Electrochemical transporter	0.0	63 / 0
Norepinephrine transporter	SLC6A2	P23975	CHEMBL222	Electrochemical transporter	0.0	0 / 1
Tyrosinase	TYR	P14679	CHEMBL1973	Oxidoreductase	0.0	10 / 7
Carbonic anhydrase VII	CA7	P43166	CHEMBL2326	Lyase	0.0	3 / 12
Tyrosine-protein kinase FYN	FYN	P06241	CHEMBL1841	Kinase	0.0	1 / 0
Transthyretin	TTR	P02766	CHEMBL3194	Secreted protein	0.0	1 / 0
Matrix metalloproteinase 1	MMP1	P03956	CHEMBL332	Protease	0.0	4 / 0
Monoamine oxidase B	MAOB	P27338	CHEMBL2039	Oxidoreductase	0.0	0 / 43
Peroxisome proliferator-activated receptor alpha	PPARA	Q07869	CHEMBL239	Nuclear receptor	0.0	0 / 1
Acetylcholinesterase	ACHE	P22303	CHEMBL220	Hydrolase	0.0	0 / 38
Tyrosyl-tRNA synthetase	YARS	P54577	CHEMBL3179	Enzyme	0.0	4 / 0
Galectin-4	LGALS4	P56470	CHEMBL1671608	Other cytosolic protein	0.0	2 / 0
Hydroxycarboxylic acid receptor 2	HCAR2	Q8TDS4	CHEMBL3785	Family A G protein-coupled receptor	0.0	43 / 0
Galectin-3	LGALS3	P17931	CHEMBL4531	Other cytosolic protein	0.0	2 / 0
Galectin-8	LGALS8	O00214	CHEMBL5475	Other cytosolic protein	0.0	2 / 0
Adenosine A2a receptor	ADORA2A	P29274	CHEMBL251	Family A G protein-coupled receptor	0.0	67 / 1
Dopamine D4 receptor	DRD4	P21917	CHEMBL219	Family A G protein-coupled receptor	0.0	1 / 0
6-O-methylguanine-DNA methyltransferase	MGMT	P16455	CHEMBL2864	Enzyme	0.0	2 / 0
Liver glycogen phosphorylase	PYGL	P06737	CHEMBL2568	Enzyme	0.0	1 / 0
Ribosomal protein S6 kinase alpha 3	RPS6KA3	P51812	CHEMBL2345	Kinase	0.0	0 / 19
Quinone reductase 2	NQO2	P16083	CHEMBL3959	Enzyme	0.0	0 / 1
Thymidine phosphorylase	TYMP	P19971	CHEMBL3106	Enzyme	0.0	1 / 0
Estradiol 17-beta-dehydrogenase 2	HSD17B2	P37059	CHEMBL2789	Enzyme	0.0	0 / 1
Carbonyl reductase [NADPH] 1	CBR1	P16152	CHEMBL5586	Enzyme	0.0	0 / 1
Arginyl-tRNA synthetase	RARS	P54136	CHEMBL2824	Enzyme	0.0	2 / 0
Carbonic anhydrase XIII	CA13	Q8N1Q1	CHEMBL3912	Lyase	0.0	1 / 3
Serum albumin	ALB	P02768	CHEMBL3253	Secreted protein	0.0	1 / 0
NADPH oxidase 4	NOX4	Q9NPH5	CHEMBL1250375	Enzyme	0.0	0 / 2
Adrenergic receptor alpha-2	ADRA2C	P18825	CHEMBL1916	Family A G protein-coupled receptor	0.0	0 / 2
Beta amyloid A4 protein	APP	P05067	CHEMBL2487	Membrane receptor	0.0	2 / 0
Aldo-keto reductase family 1 member B10	AKR1B10	O60218	CHEMBL5983	Enzyme	0.0	1 / 0
AMP deaminase 3	AMPD3	Q01432	CHEMBL2912	Enzyme	0.0	2 / 0
G protein-coupled receptor 44	PTGDR2	Q9Y5Y4	CHEMBL5071	Family A G protein-coupled receptor	0.0	2 / 0
DNA topoisomerase I	TOP1	P11387	CHEMBL1781	Isomerase	0.0	34 / 0
Dihydroorotate dehydrogenase	DHODH	Q02127	CHEMBL1966	Oxidoreductase	0.0	5 / 0
Sodium channel protein type V alpha subunit	SCN5A	Q14524	CHEMBL1980	Voltage-gated ion channel	0.0	1 / 0
Sodium channel protein type IV alpha subunit	SCN4A	P35499	CHEMBL2072	Voltage-gated ion channel	0.0	1 / 0
Sodium channel protein type II alpha subunit	SCN2A	Q99250	CHEMBL4187	Voltage-gated ion channel	0.0	1 / 0
NAD kinase	NADK	O95544	CHEMBL6177	Enzyme	0.0	2 / 0
Adenosine A2b receptor	ADORA2B	P29275	CHEMBL255	Family A G protein-coupled receptor	0.0	8 / 0
Adenosine kinase	ADK	P55263	CHEMBL3589	Enzyme	0.0	9 / 0
Sodium/nucleoside cotransporter 2	SLC28A2	O43868	CHEMBL5780	Electrochemical transporter	0.0	8 / 0
Neuromedin-U receptor 2	NMUR2	Q9GZQ4	CHEMBL1075144	Family A G protein-coupled receptor	0.0	0 / 1
Alpha-2a adrenergic receptor	ADRA2A	P08913	CHEMBL1867	Family A G protein-coupled receptor	0.0	0 / 1
Caspase-3	CASP3	P42574	CHEMBL2334	Protease	0.0	3 / 0
Matrix metalloproteinase 9	MMP9	P14780	CHEMBL321	Protease	0.0	3 / 0
Purine nucleoside phosphorylase	PNP	P00491	CHEMBL4338	Enzyme	0.0	1 / 0
Matrix metalloproteinase 12	MMP12	P39900	CHEMBL4393	Protease	0.0	3 / 0
Matrix metalloproteinase 13	MMP13	P45452	CHEMBL280	Protease	0.0	3 / 0
Matrix metalloproteinase 7	MMP7	P09237	CHEMBL4073	Protease	0.0	1 / 0
Matrix metalloproteinase 8	MMP8	P22894	CHEMBL4588	Protease	0.0	3 / 0
Glutamate carboxypeptidase II	FOLH1	Q04609	CHEMBL1892	Protease	0.0	3 / 0
Glucose transporter (by homology)	SLC2A1	P11166	CHEMBL2535	Electrochemical transporter	0.0	1 / 0
Inosine-5'-monophosphate dehydrogenase 1	IMPDH1	P20839	CHEMBL1822	Oxidoreductase	0.0	7 / 0
Inosine-5'-monophosphate dehydrogenase 2	IMPDH2	P12268	CHEMBL2002	Oxidoreductase	0.0	7 / 0
Lymphocyte differentiation antigen CD38	CD38	P28907	CHEMBL4660	Enzyme	0.0	0 / 1
78 kDa glucose-regulated protein	HSPA5	P11021	CHEMBL1781865	Unclassified protein	0.0	1 / 0
Integrin alpha-4/beta-1	ITGB1 ITGA4	P05556 P13612	CHEMBL1907599	Membrane receptor	0.0	3 / 0
Insulin-like growth factor binding protein 3	IGFBP3	P17936	CHEMBL3997	Secreted protein	0.0	7 / 0
Neuropilin-1	NRP1	O14786	CHEMBL5174	Secreted protein	0.0	3 / 0
Estrogen receptor alpha	ESR1	P03372	CHEMBL206	Nuclear receptor	0.0	0 / 6
Estrogen receptor beta	ESR2	Q92731	CHEMBL242	Nuclear receptor	0.0	0 / 3
PI3-kinase p110-alpha subunit	PIK3CA	P42336	CHEMBL4005	Enzyme	0.0	9 / 0
Neprilysin (by homology)	MME	P08473	CHEMBL1944	Protease	0.0	4 / 0
Serine/threonine-protein kinase PIM1	PIM1	P11309	CHEMBL2147	Kinase	0.0	3 / 0
ADAMTS4	ADAMTS4	O75173	CHEMBL2318	Protease	0.0	2 / 0
Chymase	CMA1	P23946	CHEMBL4068	Protease	0.0	1 / 0
Arachidonate 12-lipoxygenase	ALOX12	P18054	CHEMBL3687	Enzyme	0.0	0 / 8
Tyrosine-protein kinase SRC	SRC	P12931	CHEMBL267	Kinase	0.0	2 / 0
Dual specificity mitogen-activated protein kinase kinase 1	MAP2K1	Q02750	CHEMBL3587	Kinase	0.0	4 / 0
Interleukin-1 receptor-associated kinase 4	IRAK4	Q9NWZ3	CHEMBL3778	Kinase	0.0	6 / 0
Dual-specificity tyrosine-phosphorylation regulated kinase 2	DYRK2	Q92630	CHEMBL4376	Kinase	0.0	1 / 0
L-lactate dehydrogenase A chain	LDHA	P00338	CHEMBL4835	Enzyme	0.0	1 / 0
L-lactate dehydrogenase B chain	LDHB	P07195	CHEMBL4940	Enzyme	0.0	1 / 0
Dual-specificity tyrosine-phosphorylation regulated kinase 1A (by homology)	DYRK1A	Q13627	CHEMBL2292	Kinase	0.0	1 / 0
Matrix metalloproteinase 16	MMP16	P51512	CHEMBL2200	Protease	0.0	1 / 0
Matrix metalloproteinase 3	MMP3	P08254	CHEMBL283	Protease	0.0	1 / 0
Matrix metalloproteinase 2	MMP2	P08253	CHEMBL333	Protease	0.0	3 / 0
ADAM17	ADAM17	P78536	CHEMBL3706	Protease	0.0	2 / 0
Matrix metalloproteinase 14	MMP14	P50281	CHEMBL3869	Protease	0.0	1 / 0
Thromboxane-A synthase	TBXAS1	P24557	CHEMBL1835	Cytochrome P450	0.0	0 / 1
Monoamine oxidase A	MAOA	P21397	CHEMBL1951	Oxidoreductase	0.0	0 / 7
Maltase-glucoamylase	MGAM	O43451	CHEMBL2074	Hydrolase	0.0	0 / 1
Serotonin 2a (5-HT2a) receptor	HTR2A	P28223	CHEMBL224	Family A G protein-coupled receptor	0.0	0 / 1
Serotonin 2c (5-HT2c) receptor	HTR2C	P28335	CHEMBL225	Family A G protein-coupled receptor	0.0	0 / 1
Estradiol 17-beta-dehydrogenase 1	HSD17B1	P14061	CHEMBL3181	Enzyme	0.0	0 / 1
