# Supplementary material for: A Network Pharmacology-Based Study on Irritable Bowel Syndrome Prevention and Treatment Utilizing Shenling Baizhu Powder
Source: Biomed Res Int. 2021 Nov 23;2021:4579850. doi: 10.1155/2021/4579850 (PMC8632384; doi:10.1155/2021/4579850)
Supplement: Supplementary Materials — Please find detailed data in the supplementary file, including the original data of SymMap, metabolomics, and molecular docking of Shenling Baizhu powder. “Shenling Baizhu powder SymMap” includes all herbal targets and combined targets. “Shenling Baizhu powder metabolomics” includes two-dimensional structural data analysis. “Molecular docking” involves molecule-target docking and the results. [file 4579850.f1.zip › Data in brief/2. Shenling Baizhu powder Metabolomics/2D structure/77.csv]

Target	Common name	Uniprot ID	ChEMBL ID	Target Class	Probability*	Known actives (3D/2D)
ATP-binding cassette sub-family G member 2	ABCG2	Q9UNQ0	CHEMBL5393	Primary active transporter	0.289371849583	83 / 49
Aldose reductase (by homology)	AKR1B1	P15121	CHEMBL1900	Enzyme	0.264448565607	69 / 66
Adenosine A3 receptor	ADORA3	P0DMS8	CHEMBL256	Family A G protein-coupled receptor	0.156149436769	208 / 17
Arachidonate 5-lipoxygenase	ALOX5	P09917	CHEMBL215	Oxidoreductase	0.122827320367	163 / 46
Adenosine A1 receptor (by homology)	ADORA1	P30542	CHEMBL226	Family A G protein-coupled receptor	0.122827320367	348 / 21
Adenosine A2a receptor	ADORA2A	P29274	CHEMBL251	Family A G protein-coupled receptor	0.122827320367	267 / 10
Stem cell growth factor receptor	KIT	P10721	CHEMBL1936	Kinase	0.114494790121	70 / 2
NADPH oxidase 4	NOX4	Q9NPH5	CHEMBL1250375	Enzyme	0.114494790121	14 / 7
Beta amyloid A4 protein	APP	P05067	CHEMBL2487	Membrane receptor	0.106165761464	29 / 5
Delta opioid receptor	OPRD1	P41143	CHEMBL236	Family A G protein-coupled receptor	0.106165761464	22 / 5
P-glycoprotein 1	ABCB1	P08183	CHEMBL4302	Primary active transporter	0.106165761464	70 / 45
Cytochrome P450 1B1	CYP1B1	Q16678	CHEMBL4878	Cytochrome P450	0.106165761464	14 / 45
Mu opioid receptor	OPRM1	P35372	CHEMBL233	Family A G protein-coupled receptor	0.106165761464	33 / 1
Plasminogen	PLG	P00747	CHEMBL1801	Protease	0.106165761464	2 / 2
Carbonic anhydrase XII	CA12	O43570	CHEMBL3242	Lyase	0.106165761464	204 / 15
Vascular endothelial growth factor receptor 2	KDR	P35968	CHEMBL279	Kinase	0.106165761464	541 / 3
Cyclooxygenase-2	PTGS2	P35354	CHEMBL230	Oxidoreductase	0.106165761464	123 / 41
Induced myeloid leukemia cell differentiation protein Mcl-1	MCL1	Q07820	CHEMBL4361	Other cytosolic protein	0.106165761464	26 / 1
Carbonic anhydrase II	CA2	P00918	CHEMBL205	Lyase	0.106165761464	361 / 15
Cyclin-dependent kinase 1	CDK1	P06493	CHEMBL308	Kinase	0.106165761464	90 / 8
Xanthine dehydrogenase	XDH	P47989	CHEMBL1929	Oxidoreductase	0.106165761464	5 / 20
Serine/threonine-protein kinase PLK1	PLK1	P53350	CHEMBL3024	Kinase	0.106165761464	107 / 3
Matrix metalloproteinase 9	MMP9	P14780	CHEMBL321	Protease	0.106165761464	681 / 2
Matrix metalloproteinase 2	MMP2	P08253	CHEMBL333	Protease	0.106165761464	624 / 2
Tyrosine-protein kinase SYK	SYK	P43405	CHEMBL2599	Kinase	0.106165761464	267 / 3
Estradiol 17-beta-dehydrogenase 2	HSD17B2	P37059	CHEMBL2789	Enzyme	0.106165761464	79 / 2
Serine/threonine-protein kinase Aurora-B	AURKB	Q96GD4	CHEMBL2185	Kinase	0.106165761464	153 / 3
Focal adhesion kinase 1	PTK2	Q05397	CHEMBL2695	Kinase	0.106165761464	104 / 2
Matrix metalloproteinase 13	MMP13	P45452	CHEMBL280	Protease	0.106165761464	539 / 1
Butyrylcholinesterase	BCHE	P06276	CHEMBL1914	Hydrolase	0.106165761464	18 / 4
Ornithine decarboxylase	ODC1	P11926	CHEMBL1869	Lyase	0.106165761464	1 / 1
Hepatocyte growth factor receptor	MET	P08581	CHEMBL3717	Kinase	0.106165761464	495 / 4
Matrix metalloproteinase 3	MMP3	P08254	CHEMBL283	Protease	0.106165761464	406 / 1
PI3-kinase p110-gamma subunit	PIK3CG	P48736	CHEMBL3267	Enzyme	0.106165761464	210 / 1
Serine/threonine-protein kinase PIM1	PIM1	P11309	CHEMBL2147	Kinase	0.106165761464	85 / 5
Telomerase reverse transcriptase	TERT	O14746	CHEMBL2916	Enzyme	0.106165761464	20 / 21
Epidermal growth factor receptor erbB1	EGFR	P00533	CHEMBL203	Kinase	0.106165761464	366 / 24
Carbonic anhydrase I	CA1	P00915	CHEMBL261	Lyase	0.106165761464	313 / 5
Glycogen synthase kinase-3 beta	GSK3B	P49841	CHEMBL262	Kinase	0.106165761464	312 / 3
Carbonic anhydrase IX	CA9	Q16790	CHEMBL3594	Lyase	0.106165761464	221 / 5
Beta-secretase 1	BACE1	P56817	CHEMBL4822	Protease	0.106165761464	252 / 15
Cyclin-dependent kinase 1/cyclin B	CCNB3 CDK1 CCNB1 CCNB2	Q8WWL7 P06493 P14635 O95067	CHEMBL2094127	Other cytosolic protein	0.106165761464	51 / 4
Cyclin-dependent kinase 2	CDK2	P24941	CHEMBL301	Kinase	0.106165761464	225 / 10
Nitric oxide synthase, inducible	NOS2	P35228	CHEMBL4481	Enzyme	0.106165761464	51 / 3
PI3-kinase p85-alpha subunit	PIK3R1	P27986	CHEMBL2506	Enzyme	0.106165761464	1 / 1
Thrombin	F2	P00734	CHEMBL204	Protease	0.106165761464	117 / 2
Carbonic anhydrase VII	CA7	P43166	CHEMBL2326	Lyase	0.106165761464	44 / 12
Multidrug resistance-associated protein 1	ABCC1	P33527	CHEMBL3004	Primary active transporter	0.106165761464	14 / 11
Sphingosine kinase 2	SPHK2	Q9NRA0	CHEMBL3023	Enzyme	0.106165761464	3 / 0
Sphingosine kinase 1	SPHK1	Q9NYA1	CHEMBL4394	Enzyme	0.106165761464	3 / 0
Myosin light chain kinase, smooth muscle	MYLK	Q15746	CHEMBL2428	Kinase	0.106165761464	10 / 1
Lysine-specific demethylase 4D-like	KDM4E	B2RXH2	CHEMBL1293226	Eraser	0.106165761464	0 / 2
Glyoxalase I	GLO1	Q04760	CHEMBL2424	Enzyme	0.106165761464	0 / 4
Tyrosine-protein kinase SRC	SRC	P12931	CHEMBL267	Kinase	0.106165761464	153 / 10
Phospholipase A2 group 1B	PLA2G1B	P04054	CHEMBL4426	Enzyme	0.106165761464	0 / 1
DNA-(apurinic or apyrimidinic site) lyase	APEX1	P27695	CHEMBL5619	Enzyme	0.106165761464	0 / 1
Aldo-keto reductase family 1 member C2 (by homology)	AKR1C2	P52895	CHEMBL5847	Enzyme	0.106165761464	0 / 1
Aldo-keto reductase family 1 member C1 (by homology)	AKR1C1	Q04828	CHEMBL5905	Enzyme	0.106165761464	0 / 1
Aldo-keto reductase family 1 member C4 (by homology)	AKR1C4	P17516	CHEMBL4999	Enzyme	0.106165761464	0 / 1
Carbonic anhydrase IV	CA4	P22748	CHEMBL3729	Lyase	0.106165761464	18 / 11
Tyrosine-protein kinase receptor FLT3	FLT3	P36888	CHEMBL1974	Kinase	0.106165761464	143 / 6
Estrogen receptor beta	ESR2	Q92731	CHEMBL242	Nuclear receptor	0.106165761464	59 / 9
Cytochrome P450 19A1	CYP19A1	P11511	CHEMBL1978	Cytochrome P450	0.106165761464	46 / 13
Interleukin-8 receptor A	CXCR1	P25024	CHEMBL4029	Family A G protein-coupled receptor	0.106165761464	39 / 1
Arachidonate 15-lipoxygenase	ALOX15	P16050	CHEMBL2903	Enzyme	0.106165761464	17 / 4
Receptor-type tyrosine-protein phosphatase S	PTPRS	Q13332	CHEMBL2396508	Phosphatase	0.106165761464	0 / 7
DNA-3-methyladenine glycosylase	MPG	P29372	CHEMBL3396943	Enzyme	0.106165761464	0 / 1
Acetylcholinesterase	ACHE	P22303	CHEMBL220	Hydrolase	0.106165761464	47 / 27
Estradiol 17-beta-dehydrogenase 1	HSD17B1	P14061	CHEMBL3181	Enzyme	0.106165761464	70 / 3
Monoamine oxidase A	MAOA	P21397	CHEMBL1951	Oxidoreductase	0.106165761464	87 / 6
Kinesin-1 heavy chain/ Tyrosine-protein kinase receptor RET	RET	P07949	CHEMBL2041	Kinase	0.106165761464	81 / 0
Carbonic anhydrase VI	CA6	P23280	CHEMBL3025	Lyase	0.106165761464	27 / 1
Carbonic anhydrase XIII	CA13	Q8N1Q1	CHEMBL3912	Lyase	0.106165761464	36 / 1
Serine/threonine-protein kinase AKT	AKT1	P31749	CHEMBL4282	Kinase	0.106165761464	15 / 4
Heat shock protein HSP 90-alpha	HSP90AA1	P07900	CHEMBL3880	Other cytosolic protein	0.106165761464	84 / 0
G-protein coupled receptor 35	GPR35	Q9HC97	CHEMBL1293267	Family A G protein-coupled receptor	0.106165761464	2 / 4
Insulin-like growth factor I receptor	IGF1R	P08069	CHEMBL1957	Kinase	0.106165761464	114 / 3
Insulin receptor	INSR	P06213	CHEMBL1981	Kinase	0.106165761464	47 / 1
ALK tyrosine kinase receptor	ALK	Q9UM73	CHEMBL4247	Kinase	0.106165761464	55 / 3
Carbonic anhydrase XIV	CA14	Q9ULX7	CHEMBL3510	Lyase	0.106165761464	23 / 1
Carbonic anhydrase VA	CA5A	P35218	CHEMBL4789	Lyase	0.106165761464	13 / 1
Arginase-1 (by homology)	ARG1	P05089	CHEMBL1075097	Enzyme	0.106165761464	0 / 2
Cyclin-dependent kinase 4/cyclin D1	CCND1 CDK4	P24385 P11802	CHEMBL1907601	Kinase	0.106165761464	78 / 0
Cyclin-dependent kinase 2/cyclin E	CCNE2 CDK2 CCNE1	O96020 P24941 P24864	CHEMBL2094126	Other cytosolic protein	0.106165761464	89 / 0
Vascular endothelial growth factor receptor 1	FLT1	P17948	CHEMBL1868	Kinase	0.106165761464	67 / 0
Fibroblast growth factor receptor 1	FGFR1	P11362	CHEMBL3650	Kinase	0.106165761464	66 / 0
Casein kinase II alpha	CSNK2A1	P68400	CHEMBL3629	Kinase	0.106165761464	35 / 2
Vasopressin V2 receptor	AVPR2	P30518	CHEMBL1790	Family A G protein-coupled receptor	0.106165761464	10 / 1
Cyclin-dependent kinase 5/CDK5 activator 1	CDK5R1 CDK5	Q15078 Q00535	CHEMBL1907600	Kinase	0.106165761464	137 / 5
Tubulin beta-1 chain	TUBB1	Q9H4B7	CHEMBL1915	Structural protein	0.106165761464	22 / 0
Myeloperoxidase	MPO	P05164	CHEMBL2439	Enzyme	0.106165761464	5 / 1
Tyrosine-protein kinase receptor UFO	AXL	P30530	CHEMBL4895	Kinase	0.106165761464	11 / 3
Platelet-derived growth factor receptor beta	PDGFRB	P09619	CHEMBL1913	Kinase	0.106165761464	92 / 0
Arachidonate 12-lipoxygenase	ALOX12	P18054	CHEMBL3687	Enzyme	0.106165761464	1 / 3
Death-associated protein kinase 1	DAPK1	P53355	CHEMBL2558	Kinase	0.106165761464	3 / 2
Protein kinase N1	PKN1	Q16512	CHEMBL3384	Kinase	0.106165761464	1 / 2
Serine/threonine-protein kinase NEK2	NEK2	P51955	CHEMBL3835	Kinase	0.106165761464	7 / 2
Serine/threonine-protein kinase NEK6	NEK6	Q9HC98	CHEMBL4309	Kinase	0.106165761464	1 / 2
NUAK family SNF1-like kinase 1	NUAK1	O60285	CHEMBL5784	Kinase	0.106165761464	2 / 2
ADAMTS5	ADAMTS5	Q9UNA0	CHEMBL2285	Protease	0.106165761464	36 / 0
