# Supplementary material for: A Network Pharmacology-Based Study on Irritable Bowel Syndrome Prevention and Treatment Utilizing Shenling Baizhu Powder
Source: Biomed Res Int. 2021 Nov 23;2021:4579850. doi: 10.1155/2021/4579850 (PMC8632384; doi:10.1155/2021/4579850)
Supplement: Supplementary Materials — Please find detailed data in the supplementary file, including the original data of SymMap, metabolomics, and molecular docking of Shenling Baizhu powder. “Shenling Baizhu powder SymMap” includes all herbal targets and combined targets. “Shenling Baizhu powder metabolomics” includes two-dimensional structural data analysis. “Molecular docking” involves molecule-target docking and the results. [file 4579850.f1.zip › Data in brief/2. Shenling Baizhu powder Metabolomics/2D structure/78.csv]

Target	Common name	Uniprot ID	ChEMBL ID	Target Class	Probability*	Known actives (3D/2D)
Sodium/glucose cotransporter 1	SLC5A1	P13866	CHEMBL4979	Electrochemical transporter	0.189458321629	46 / 69
Low affinity sodium-glucose cotransporter	SLC5A4	Q9NY91	CHEMBL1770047	Electrochemical transporter	0.172809876379	1 / 14
Sodium/glucose cotransporter 2	SLC5A2	P31639	CHEMBL3884	Electrochemical transporter	0.172809876379	118 / 128
Cytochrome P450 19A1	CYP19A1	P11511	CHEMBL1978	Cytochrome P450	0.164472079913	1 / 41
Solute carrier family 28 member 3	SLC28A3	Q9HAS3	CHEMBL5707	Electrochemical transporter	0.114494790121	1 / 1
Tyrosinase	TYR	P14679	CHEMBL1973	Oxidoreductase	0.106165761464	15 / 14
Adenosine A1 receptor (by homology)	ADORA1	P30542	CHEMBL226	Family A G protein-coupled receptor	0.106165761464	270 / 5
Epoxide hydratase	EPHX2	P34913	CHEMBL2409	Protease	0.106165761464	3 / 3
Adenosine A3 receptor	ADORA3	P0DMS8	CHEMBL256	Family A G protein-coupled receptor	0.106165761464	97 / 2
Eukaryotic initiation factor 4A-I	EIF4A1	P60842	CHEMBL2052028	Hydrolase	0.106165761464	0 / 29
Matrix metalloproteinase 13	MMP13	P45452	CHEMBL280	Protease	0.106165761464	5 / 1
Matrix metalloproteinase 12	MMP12	P39900	CHEMBL4393	Protease	0.106165761464	5 / 2
Carbonic anhydrase XII	CA12	O43570	CHEMBL3242	Lyase	0.106165761464	53 / 11
Monoamine oxidase B	MAOB	P27338	CHEMBL2039	Oxidoreductase	0.106165761464	0 / 61
Cytochrome P450 1B1	CYP1B1	Q16678	CHEMBL4878	Cytochrome P450	0.106165761464	0 / 6
Taste receptor type 2 member 31	TAS2R31	P59538	CHEMBL2034804	Taste family G protein-coupled receptor	0.106165761464	0 / 3
Steroid 5-alpha-reductase 1	SRD5A1	P18405	CHEMBL1787	Oxidoreductase	0.106165761464	1 / 1
Multidrug resistance-associated protein 1	ABCC1	P33527	CHEMBL3004	Primary active transporter	0.106165761464	0 / 2
Estradiol 17-beta-dehydrogenase 1	HSD17B1	P14061	CHEMBL3181	Enzyme	0.106165761464	0 / 1
Testis-specific androgen-binding protein	SHBG	P04278	CHEMBL3305	Secreted protein	0.106165761464	0 / 1
Carbonyl reductase [NADPH] 1	CBR1	P16152	CHEMBL5586	Enzyme	0.106165761464	0 / 1
Matrix metalloproteinase 1	MMP1	P03956	CHEMBL332	Protease	0.106165761464	6 / 0
Matrix metalloproteinase 7	MMP7	P09237	CHEMBL4073	Protease	0.106165761464	1 / 0
Matrix metalloproteinase 8	MMP8	P22894	CHEMBL4588	Protease	0.106165761464	10 / 0
Adenosine A2a receptor (by homology)	ADORA2A	P29274	CHEMBL251	Family A G protein-coupled receptor	0.106165761464	122 / 0
ATP-binding cassette sub-family G member 2	ABCG2	Q9UNQ0	CHEMBL5393	Primary active transporter	0.106165761464	0 / 7
T-cell protein-tyrosine phosphatase	PTPN2	P17706	CHEMBL3807	Phosphatase	0.106165761464	0 / 2
Aldose reductase	AKR1B1	P15121	CHEMBL1900	Enzyme	0.106165761464	23 / 47
Estrogen receptor alpha	ESR1	P03372	CHEMBL206	Nuclear receptor	0.106165761464	0 / 58
Estrogen receptor beta	ESR2	Q92731	CHEMBL242	Nuclear receptor	0.106165761464	0 / 51
Carbonic anhydrase IV	CA4	P22748	CHEMBL3729	Lyase	0.106165761464	8 / 7
Telomerase reverse transcriptase	TERT	O14746	CHEMBL2916	Enzyme	0.106165761464	0 / 2
Equilibrative nucleoside transporter 1	SLC29A1	Q99808	CHEMBL1997	Electrochemical transporter	0.106165761464	69 / 0
Cyclooxygenase-1	PTGS1	P23219	CHEMBL221	Oxidoreductase	0.106165761464	1 / 6
Adenosine A2b receptor	ADORA2B	P29275	CHEMBL255	Family A G protein-coupled receptor	0.106165761464	15 / 0
Carbonic anhydrase XIV	CA14	Q9ULX7	CHEMBL3510	Lyase	0.106165761464	25 / 0
Carbonic anhydrase II	CA2	P00918	CHEMBL205	Lyase	0.0	88 / 2
Carbonic anhydrase I	CA1	P00915	CHEMBL261	Lyase	0.0	85 / 4
Purine nucleoside phosphorylase	PNP	P00491	CHEMBL4338	Enzyme	0.0	14 / 0
Carbonic anhydrase VB	CA5B	Q9Y2D0	CHEMBL3969	Lyase	0.0	0 / 2
P-glycoprotein 1 (by homology)	ABCB1	P08183	CHEMBL4302	Primary active transporter	0.0	0 / 70
Type-1 angiotensin II receptor (by homology)	AGTR1	P30556	CHEMBL227	Family A G protein-coupled receptor	0.0	1 / 0
Tyrosyl-DNA phosphodiesterase 1	TDP1	Q9NUW8	CHEMBL1075138	Enzyme	0.0	2 / 2
Acyl coenzyme A:cholesterol acyltransferase	CES1	P23141	CHEMBL2265	Enzyme	0.0	0 / 1
Carboxylesterase 2	CES2	O00748	CHEMBL3180	Enzyme	0.0	0 / 1
Adenosine kinase	ADK	P55263	CHEMBL3589	Enzyme	0.0	13 / 0
Sodium/nucleoside cotransporter 2	SLC28A2	O43868	CHEMBL5780	Electrochemical transporter	0.0	10 / 0
Serum albumin	ALB	P02768	CHEMBL3253	Secreted protein	0.0	2 / 0
Carbonic anhydrase VII	CA7	P43166	CHEMBL2326	Lyase	0.0	7 / 7
AMP deaminase 3	AMPD3	Q01432	CHEMBL2912	Enzyme	0.0	3 / 0
Phospholipase A2 group 1B	PLA2G1B	P04054	CHEMBL4426	Enzyme	0.0	0 / 1
Serine/threonine-protein kinase PIM1	PIM1	P11309	CHEMBL2147	Kinase	0.0	17 / 0
Dual-specificity tyrosine-phosphorylation regulated kinase 2	DYRK2	Q92630	CHEMBL4376	Kinase	0.0	1 / 0
Hydroxycarboxylic acid receptor 2	HCAR2	Q8TDS4	CHEMBL3785	Family A G protein-coupled receptor	0.0	53 / 0
Retinoid X receptor alpha	RXRA	P19793	CHEMBL2061	Nuclear receptor	0.0	0 / 3
Glutamate carboxypeptidase II	FOLH1	Q04609	CHEMBL1892	Protease	0.0	4 / 0
Arginyl-tRNA synthetase	RARS	P54136	CHEMBL2824	Enzyme	0.0	2 / 0
Insulin-like growth factor binding protein 3	IGFBP3	P17936	CHEMBL3997	Secreted protein	0.0	16 / 0
Transthyretin	TTR	P02766	CHEMBL3194	Secreted protein	0.0	1 / 0
c-Jun N-terminal kinase 1	MAPK8	P45983	CHEMBL2276	Kinase	0.0	6 / 0
Protein-tyrosine phosphatase 1B	PTPN1	P18031	CHEMBL335	Phosphatase	0.0	6 / 8
Lysine-specific demethylase 3A	KDM3A	Q9Y4C1	CHEMBL1938209	Eraser	0.0	2 / 0
Thymidylate synthase (by homology)	TYMS	P04818	CHEMBL1952	Transferase	0.0	18 / 0
Lysine-specific demethylase 4C	KDM4C	Q9H3R0	CHEMBL6175	Eraser	0.0	6 / 0
Liver glycogen phosphorylase	PYGL	P06737	CHEMBL2568	Enzyme	0.0	13 / 0
Plasminogen activator inhibitor-1	SERPINE1	P05121	CHEMBL3475	Secreted protein	0.0	0 / 8
Metabotropic glutamate receptor 5	GRM5	P41594	CHEMBL3227	Family C G protein-coupled receptor	0.0	0 / 8
6-O-methylguanine-DNA methyltransferase	MGMT	P16455	CHEMBL2864	Enzyme	0.0	1 / 0
Dihydroorotate dehydrogenase	DHODH	Q02127	CHEMBL1966	Oxidoreductase	0.0	11 / 0
Aldo-keto reductase family 1 member B10	AKR1B10	O60218	CHEMBL5983	Enzyme	0.0	2 / 0
Beta-secretase 1	BACE1	P56817	CHEMBL4822	Protease	0.0	0 / 13
AICAR transformylase	ATIC	P31939	CHEMBL2518	Enzyme	0.0	1 / 0
Galectin-4	LGALS4	P56470	CHEMBL1671608	Other cytosolic protein	0.0	2 / 0
Galectin-8	LGALS8	O00214	CHEMBL5475	Other cytosolic protein	0.0	2 / 0
Interleukin-1 receptor-associated kinase 4	IRAK4	Q9NWZ3	CHEMBL3778	Kinase	0.0	9 / 0
PI3-kinase p110-alpha subunit	PIK3CA	P42336	CHEMBL4005	Enzyme	0.0	18 / 0
Phospholipase A2 group IIA	PLA2G2A	P14555	CHEMBL3474	Enzyme	0.0	0 / 6
Phospholipase A2 group V	PLA2G5	P39877	CHEMBL4323	Enzyme	0.0	0 / 1
Group X secretory phospholipase A2	PLA2G10	O15496	CHEMBL4342	Enzyme	0.0	0 / 1
Thymidine phosphorylase	TYMP	P19971	CHEMBL3106	Enzyme	0.0	1 / 0
Tyrosyl-tRNA synthetase	YARS	P54577	CHEMBL3179	Enzyme	0.0	4 / 0
Ileal bile acid transporter	SLC10A2	Q12908	CHEMBL2778	Electrochemical transporter	0.0	0 / 1
Caspase-3	CASP3	P42574	CHEMBL2334	Protease	0.0	14 / 0
Caspase-6	CASP6	P55212	CHEMBL3308	Protease	0.0	3 / 0
Caspase-7	CASP7	P55210	CHEMBL3468	Protease	0.0	3 / 0
Caspase-8	CASP8	Q14790	CHEMBL3776	Protease	0.0	3 / 0
Caspase-1	CASP1	P29466	CHEMBL4801	Protease	0.0	3 / 0
L-lactate dehydrogenase A chain	LDHA	P00338	CHEMBL4835	Enzyme	0.0	1 / 0
Caspase-2	CASP2	P42575	CHEMBL4884	Protease	0.0	2 / 0
L-lactate dehydrogenase B chain	LDHB	P07195	CHEMBL4940	Enzyme	0.0	1 / 0
Acidic mammalian chitinase	CHIA	Q9BZP6	CHEMBL1293197	Enzyme	0.0	1 / 0
Methionyl-tRNA synthetase	MARS	P56192	CHEMBL2870	Enzyme	0.0	3 / 0
Integrin alpha-4/beta-1	ITGB1 ITGA4	P05556 P13612	CHEMBL1907599	Membrane receptor	0.0	15 / 0
Glutaminyl-tRNA synthetase	QARS	P47897	CHEMBL3054	Enzyme	0.0	1 / 0
Muscle glycogen phosphorylase	PYGM	P11217	CHEMBL3526	Enzyme	0.0	3 / 0
Poly [ADP-ribose] polymerase-1	PARP1	P09874	CHEMBL3105	Enzyme	0.0	2 / 0
Epidermal growth factor receptor erbB1	EGFR	P00533	CHEMBL203	Kinase	0.0	3 / 0
Lysine-specific demethylase 5B	KDM5B	Q9UGL1	CHEMBL3774295	Eraser	0.0	1 / 0
Lysine-specific demethylase 4D	KDM4D	Q6B0I6	CHEMBL6138	Eraser	0.0	2 / 0
Transforming protein p21/H-Ras-1	HRAS	P01112	CHEMBL2167	Other cytosolic protein	0.0	2 / 0
