# Supplementary material for: A Network Pharmacology-Based Study on Irritable Bowel Syndrome Prevention and Treatment Utilizing Shenling Baizhu Powder
Source: Biomed Res Int. 2021 Nov 23;2021:4579850. doi: 10.1155/2021/4579850 (PMC8632384; doi:10.1155/2021/4579850)
Supplement: Supplementary Materials — Please find detailed data in the supplementary file, including the original data of SymMap, metabolomics, and molecular docking of Shenling Baizhu powder. “Shenling Baizhu powder SymMap” includes all herbal targets and combined targets. “Shenling Baizhu powder metabolomics” includes two-dimensional structural data analysis. “Molecular docking” involves molecule-target docking and the results. [file 4579850.f1.zip › Data in brief/2. Shenling Baizhu powder Metabolomics/2D structure/79.csv]

Target	Common name	Uniprot ID	ChEMBL ID	Target Class	Probability*	Known actives (3D/2D)
Aldehyde dehydrogenase	ALDH2	P05091	CHEMBL1935	Oxidoreductase	0.159097440426	0 / 37
Interleukin-2	IL2	P60568	CHEMBL5880	Secreted protein	0.126928723833	2 / 5
Carbonic anhydrase XII	CA12	O43570	CHEMBL3242	Lyase	0.118883306718	44 / 22
Norepinephrine transporter	SLC6A2	P23975	CHEMBL222	Electrochemical transporter	0.118883306718	0 / 1
Monoamine oxidase B	MAOB	P27338	CHEMBL2039	Oxidoreductase	0.118883306718	0 / 95
TNF-alpha	TNF	P01375	CHEMBL1825	Secreted protein	0.118883306718	2 / 3
Sodium/glucose cotransporter 2	SLC5A2	P31639	CHEMBL3884	Electrochemical transporter	0.118883306718	308 / 0
Epidermal growth factor receptor erbB1	EGFR	P00533	CHEMBL203	Kinase	0.118883306718	16 / 25
Cytochrome P450 19A1	CYP19A1	P11511	CHEMBL1978	Cytochrome P450	0.118883306718	0 / 14
Carbonic anhydrase VII	CA7	P43166	CHEMBL2326	Lyase	0.118883306718	0 / 12
Estradiol 17-beta-dehydrogenase 2	HSD17B2	P37059	CHEMBL2789	Enzyme	0.118883306718	0 / 1
Carbonic anhydrase IV	CA4	P22748	CHEMBL3729	Lyase	0.118883306718	0 / 8
Carbonyl reductase [NADPH] 1	CBR1	P16152	CHEMBL5586	Enzyme	0.118883306718	0 / 1
Equilibrative nucleoside transporter 1	SLC29A1	Q99808	CHEMBL1997	Electrochemical transporter	0.118883306718	48 / 0
Acetylcholinesterase	ACHE	P22303	CHEMBL220	Hydrolase	0.118883306718	0 / 81
Carbonic anhydrase I	CA1	P00915	CHEMBL261	Lyase	0.118883306718	65 / 18
Adenosine A1 receptor (by homology)	ADORA1	P30542	CHEMBL226	Family A G protein-coupled receptor	0.118883306718	268 / 7
Beta-glucocerebrosidase	GBA	P04062	CHEMBL2179	Enzyme	0.118883306718	69 / 0
Low affinity sodium-glucose cotransporter	SLC5A4	Q9NY91	CHEMBL1770047	Electrochemical transporter	0.118883306718	4 / 0
P-glycoprotein 1	ABCB1	P08183	CHEMBL4302	Primary active transporter	0.118883306718	0 / 11
Sodium/glucose cotransporter 1	SLC5A1	P13866	CHEMBL4979	Electrochemical transporter	0.118883306718	52 / 0
Cyclooxygenase-1	PTGS1	P23219	CHEMBL221	Oxidoreductase	0.118883306718	1 / 1
Carbonic anhydrase II	CA2	P00918	CHEMBL205	Lyase	0.118883306718	68 / 16
Thromboxane-A synthase	TBXAS1	P24557	CHEMBL1835	Cytochrome P450	0.118883306718	0 / 1
Monoamine oxidase A	MAOA	P21397	CHEMBL1951	Oxidoreductase	0.118883306718	0 / 31
Estradiol 17-beta-dehydrogenase 1	HSD17B1	P14061	CHEMBL3181	Enzyme	0.118883306718	0 / 1
Estrogen-related receptor alpha	ESRRA	P11474	CHEMBL3429	Nuclear receptor	0.118883306718	0 / 1
Estrogen-related receptor beta	ESRRB	O95718	CHEMBL3751	Nuclear receptor	0.118883306718	0 / 1
ATP-binding cassette sub-family G member 2	ABCG2	Q9UNQ0	CHEMBL5393	Primary active transporter	0.118883306718	0 / 10
Adenosine A2a receptor	ADORA2A	P29274	CHEMBL251	Family A G protein-coupled receptor	0.118883306718	194 / 4
Maltase-glucoamylase	MGAM	O43451	CHEMBL2074	Hydrolase	0.118883306718	8 / 1
Sodium/nucleoside cotransporter 2	SLC28A2	O43868	CHEMBL5780	Electrochemical transporter	0.118883306718	17 / 0
Beta-glucosidase	GBA2	Q9HCG7	CHEMBL3761	Enzyme	0.118883306718	55 / 0
Arachidonate 12-lipoxygenase	ALOX12	P18054	CHEMBL3687	Enzyme	0.118883306718	0 / 8
Ceramide glucosyltransferase	UGCG	Q16739	CHEMBL2063	Transferase	0.118883306718	50 / 0
Tyrosine-protein kinase ABL	ABL1	P00519	CHEMBL1862	Kinase	0.0	4 / 0
Platelet-derived growth factor receptor	PDGFRA PDGFRB	P16234 P09619	CHEMBL2095189	Kinase	0.0	3 / 0
MAP kinase p38 alpha	MAPK14	Q16539	CHEMBL260	Kinase	0.0	8 / 0
Tyrosine-protein kinase SRC	SRC	P12931	CHEMBL267	Kinase	0.0	8 / 0
Programmed cell death 1 ligand 1	CD274	Q9NZQ7	CHEMBL3580522	Unclassified protein	0.0	1 / 0
DNA topoisomerase I	TOP1	P11387	CHEMBL1781	Isomerase	0.0	35 / 0
Sucrase-isomaltase	SI	P14410	CHEMBL2748	Enzyme	0.0	8 / 0
Macrophage migration inhibitory factor	MIF	P14174	CHEMBL2085	Enzyme	0.0	0 / 3
Tyrosinase (by homology)	TYR	P14679	CHEMBL1973	Oxidoreductase	0.0	0 / 1
Lactase-phlorizin hydrolase	LCT	P09848	CHEMBL1075131	Enzyme	0.0	1 / 0
Integrin alpha-4/beta-1	ITGB1 ITGA4	P05556 P13612	CHEMBL1907599	Membrane receptor	0.0	35 / 0
Xanthine dehydrogenase	XDH	P47989	CHEMBL1929	Oxidoreductase	0.0	0 / 11
Adenosine kinase	ADK	P55263	CHEMBL3589	Enzyme	0.0	4 / 0
Neprilysin	MME	P08473	CHEMBL1944	Protease	0.0	27 / 0
Matrix metalloproteinase 3	MMP3	P08254	CHEMBL283	Protease	0.0	23 / 0
Matrix metalloproteinase 9	MMP9	P14780	CHEMBL321	Protease	0.0	22 / 0
Matrix metalloproteinase 1	MMP1	P03956	CHEMBL332	Protease	0.0	16 / 0
ADAM17	ADAM17	P78536	CHEMBL3706	Protease	0.0	7 / 0
Lysosomal alpha-glucosidase (by homology)	GAA	P10253	CHEMBL2608	Hydrolase	0.0	5 / 0
Peptidyl-prolyl cis-trans isomerase NIMA-interacting 1	PIN1	Q13526	CHEMBL2288	Enzyme	0.0	2 / 0
Coagulation factor VII/tissue factor	F3	P13726	CHEMBL4081	Surface antigen	0.0	2 / 0
Receptor-type tyrosine-protein phosphatase S	PTPRS	Q13332	CHEMBL2396508	Phosphatase	0.0	0 / 2
6-O-methylguanine-DNA methyltransferase	MGMT	P16455	CHEMBL2864	Enzyme	0.0	6 / 0
Alpha-L-fucosidase I	FUCA1	P04066	CHEMBL4176	Enzyme	0.0	6 / 0
Carbonic anhydrase IX	CA9	Q16790	CHEMBL3594	Lyase	0.0	51 / 22
Thymidine kinase, mitochondrial	TK2	O00142	CHEMBL4580	Enzyme	0.0	1 / 0
Poly [ADP-ribose] polymerase-1	PARP1	P09874	CHEMBL3105	Enzyme	0.0	3 / 0
Hydroxycarboxylic acid receptor 2	HCAR2	Q8TDS4	CHEMBL3785	Family A G protein-coupled receptor	0.0	39 / 0
Arachidonate 15-lipoxygenase	ALOX15	P16050	CHEMBL2903	Enzyme	0.0	0 / 4
Macrophage colony stimulating factor receptor	CSF1R	P07333	CHEMBL1844	Kinase	0.0	4 / 0
Dopamine transporter (by homology)	SLC6A3	Q01959	CHEMBL238	Electrochemical transporter	0.0	0 / 2
Thymidine phosphorylase	TYMP	P19971	CHEMBL3106	Enzyme	0.0	1 / 0
Beta-glucosidase cytosolic	GBA3	Q9H227	CHEMBL3865	Enzyme	0.0	1 / 0
Adenosine A2b receptor	ADORA2B	P29275	CHEMBL255	Family A G protein-coupled receptor	0.0	12 / 0
Dual specificity mitogen-activated protein kinase kinase 1	MAP2K1	Q02750	CHEMBL3587	Kinase	0.0	14 / 0
Toll-like receptor (TLR7/TLR9)	TLR9	Q9NR96	CHEMBL5804	Toll-like and Il-1 receptors	0.0	0 / 1
Protein kinase C alpha	PRKCA	P17252	CHEMBL299	Kinase	0.0	3 / 0
Sphingosine 1-phosphate receptor Edg-3	S1PR3	Q99500	CHEMBL3892	Family A G protein-coupled receptor	0.0	8 / 0
Sphingosine 1-phosphate receptor Edg-1	S1PR1	P21453	CHEMBL4333	Family A G protein-coupled receptor	0.0	9 / 0
Serine/threonine-protein kinase Chk1	CHEK1	O14757	CHEMBL4630	Kinase	0.0	7 / 0
Bifunctional protein NCOAT	OGA	O60502	CHEMBL5921	Enzyme	0.0	1 / 0
PI3-kinase p110-alpha subunit	PIK3CA	P42336	CHEMBL4005	Enzyme	0.0	7 / 0
Matrix metalloproteinase 13	MMP13	P45452	CHEMBL280	Protease	0.0	42 / 0
Matrix metalloproteinase 2	MMP2	P08253	CHEMBL333	Protease	0.0	31 / 0
Matrix metalloproteinase 7	MMP7	P09237	CHEMBL4073	Protease	0.0	4 / 0
Fatty acid synthase	FASN	P49327	CHEMBL4158	Transferase	0.0	1 / 0
Vanilloid receptor	TRPV1	Q8NER1	CHEMBL4794	Voltage-gated ion channel	0.0	4 / 0
Squalene synthetase (by homology)	FDFT1	P37268	CHEMBL3338	Enzyme	0.0	10 / 0
Estrogen receptor alpha	ESR1	P03372	CHEMBL206	Nuclear receptor	0.0	1 / 25
Estrogen receptor beta	ESR2	Q92731	CHEMBL242	Nuclear receptor	0.0	1 / 8
Glutamate carboxypeptidase II	FOLH1	Q04609	CHEMBL1892	Protease	0.0	22 / 0
GTPase NRas	NRAS	P01111	CHEMBL2079845	Unclassified protein	0.0	1 / 0
Endoplasmic reticulum mannosyl-oligosaccharide 1,2-alpha-mannosidase	MAN1B1	Q9UKM7	CHEMBL2308	Enzyme	0.0	3 / 0
Nerve growth factor receptor Trk-A	NTRK1	P04629	CHEMBL2815	Kinase	0.0	24 / 0
5-lipoxygenase activating protein	ALOX5AP	P20292	CHEMBL4550	Other cytosolic protein	0.0	24 / 0
Thrombin	F2	P00734	CHEMBL204	Protease	0.0	10 / 0
Coagulation factor VII	F7	P08709	CHEMBL3991	Protease	0.0	4 / 0
Matrix metalloproteinase 10	MMP10	P09238	CHEMBL4270	Protease	0.0	7 / 0
Matrix metalloproteinase 12	MMP12	P39900	CHEMBL4393	Protease	0.0	31 / 0
Matrix metalloproteinase 8	MMP8	P22894	CHEMBL4588	Protease	0.0	11 / 0
Beta-galactosidase	GLB1	P16278	CHEMBL2522	Hydrolase	0.0	2 / 0
Protein Mdm4	MDM4	O15151	CHEMBL1255126	Unclassified protein	0.0	1 / 0
Folate receptor alpha	FOLR1	P15328	CHEMBL2121	Membrane receptor	0.0	1 / 0
GAR transformylase	GART	P22102	CHEMBL3972	Ligase	0.0	2 / 0
p53-binding protein Mdm-2	MDM2	Q00987	CHEMBL5023	Other nuclear protein	0.0	1 / 0
