# Supplementary material for: A Network Pharmacology-Based Study on Irritable Bowel Syndrome Prevention and Treatment Utilizing Shenling Baizhu Powder
Source: Biomed Res Int. 2021 Nov 23;2021:4579850. doi: 10.1155/2021/4579850 (PMC8632384; doi:10.1155/2021/4579850)
Supplement: Supplementary Materials — Please find detailed data in the supplementary file, including the original data of SymMap, metabolomics, and molecular docking of Shenling Baizhu powder. “Shenling Baizhu powder SymMap” includes all herbal targets and combined targets. “Shenling Baizhu powder metabolomics” includes two-dimensional structural data analysis. “Molecular docking” involves molecule-target docking and the results. [file 4579850.f1.zip › Data in brief/2. Shenling Baizhu powder Metabolomics/2D structure/81.csv]

Target	Common name	Uniprot ID	ChEMBL ID	Target Class	Probability*	Known actives (3D/2D)
ATP-binding cassette sub-family G member 2	ABCG2	Q9UNQ0	CHEMBL5393	Primary active transporter	0.995022825009	88 / 49
Aldose reductase	AKR1B1	P15121	CHEMBL1900	Enzyme	0.255622823612	19 / 66
Adenosine A3 receptor	ADORA3	P0DMS8	CHEMBL256	Family A G protein-coupled receptor	0.191271931761	341 / 17
NADPH oxidase 4	NOX4	Q9NPH5	CHEMBL1250375	Enzyme	0.159097440426	18 / 7
Adenosine A1 receptor	ADORA1	P30542	CHEMBL226	Family A G protein-coupled receptor	0.151057725241	519 / 21
Carbonic anhydrase II	CA2	P00918	CHEMBL205	Lyase	0.143014512691	317 / 17
Beta amyloid A4 protein	APP	P05067	CHEMBL2487	Membrane receptor	0.143014512691	20 / 5
Adenosine A2a receptor	ADORA2A	P29274	CHEMBL251	Family A G protein-coupled receptor	0.134971891997	477 / 10
Cytochrome P450 1B1	CYP1B1	Q16678	CHEMBL4878	Cytochrome P450	0.134971891997	15 / 45
Carbonic anhydrase XII	CA12	O43570	CHEMBL3242	Lyase	0.134971891997	215 / 17
Delta opioid receptor	OPRD1	P41143	CHEMBL236	Family A G protein-coupled receptor	0.134971891997	15 / 5
Stem cell growth factor receptor	KIT	P10721	CHEMBL1936	Kinase	0.126928723833	80 / 2
Mu opioid receptor	OPRM1	P35372	CHEMBL233	Family A G protein-coupled receptor	0.126928723833	33 / 1
Tyrosine-protein kinase receptor FLT3	FLT3	P36888	CHEMBL1974	Kinase	0.126928723833	165 / 6
Epidermal growth factor receptor erbB1	EGFR	P00533	CHEMBL203	Kinase	0.126928723833	412 / 24
Tyrosine-protein kinase SRC	SRC	P12931	CHEMBL267	Kinase	0.126928723833	177 / 10
Carbonic anhydrase VII	CA7	P43166	CHEMBL2326	Lyase	0.126928723833	41 / 15
Plasminogen	PLG	P00747	CHEMBL1801	Protease	0.126928723833	1 / 2
P-glycoprotein 1	ABCB1	P08183	CHEMBL4302	Primary active transporter	0.126928723833	102 / 46
Glycogen synthase kinase-3 beta	GSK3B	P49841	CHEMBL262	Kinase	0.126928723833	308 / 3
Arachidonate 5-lipoxygenase	ALOX5	P09917	CHEMBL215	Oxidoreductase	0.118883306718	98 / 46
Cyclin-dependent kinase 1	CDK1	P06493	CHEMBL308	Kinase	0.118883306718	115 / 8
CaM kinase II beta	CAMK2B	Q13554	CHEMBL4121	Kinase	0.118883306718	1 / 1
Serine/threonine-protein kinase PLK1	PLK1	P53350	CHEMBL3024	Kinase	0.118883306718	103 / 3
Carbonic anhydrase IV	CA4	P22748	CHEMBL3729	Lyase	0.118883306718	8 / 12
Vascular endothelial growth factor receptor 2	KDR	P35968	CHEMBL279	Kinase	0.118883306718	711 / 3
PI3-kinase p110-gamma subunit	PIK3CG	P48736	CHEMBL3267	Enzyme	0.118883306718	210 / 1
Hepatocyte growth factor receptor	MET	P08581	CHEMBL3717	Kinase	0.118883306718	587 / 4
Tyrosine-protein kinase SYK	SYK	P43405	CHEMBL2599	Kinase	0.118883306718	355 / 3
Carbonic anhydrase I	CA1	P00915	CHEMBL261	Lyase	0.118883306718	305 / 8
Matrix metalloproteinase 13	MMP13	P45452	CHEMBL280	Protease	0.118883306718	162 / 1
Induced myeloid leukemia cell differentiation protein Mcl-1	MCL1	Q07820	CHEMBL4361	Other cytosolic protein	0.118883306718	14 / 4
Focal adhesion kinase 1	PTK2	Q05397	CHEMBL2695	Kinase	0.118883306718	102 / 2
Cyclin-dependent kinase 2	CDK2	P24941	CHEMBL301	Kinase	0.118883306718	236 / 12
Cyclooxygenase-2	PTGS2	P35354	CHEMBL230	Oxidoreductase	0.118883306718	102 / 41
Thrombin	F2	P00734	CHEMBL204	Protease	0.118883306718	134 / 2
Casein kinase II alpha	CSNK2A1	P68400	CHEMBL3629	Kinase	0.118883306718	34 / 2
Serine/threonine-protein kinase Aurora-B	AURKB	Q96GD4	CHEMBL2185	Kinase	0.118883306718	206 / 3
Tyrosine-protein kinase receptor UFO	AXL	P30530	CHEMBL4895	Kinase	0.118883306718	13 / 3
Carbonic anhydrase IX	CA9	Q16790	CHEMBL3594	Lyase	0.118883306718	217 / 7
Acetylcholinesterase	ACHE	P22303	CHEMBL220	Hydrolase	0.118883306718	54 / 31
Serine/threonine-protein kinase NEK2	NEK2	P51955	CHEMBL3835	Kinase	0.118883306718	7 / 2
ALK tyrosine kinase receptor	ALK	Q9UM73	CHEMBL4247	Kinase	0.118883306718	71 / 3
Serine/threonine-protein kinase PIM1	PIM1	P11309	CHEMBL2147	Kinase	0.118883306718	56 / 5
G-protein coupled receptor 35	GPR35	Q9HC97	CHEMBL1293267	Family A G protein-coupled receptor	0.118883306718	1 / 2
Serine/threonine-protein kinase AKT	AKT1	P31749	CHEMBL4282	Kinase	0.118883306718	34 / 4
Beta-secretase 1	BACE1	P56817	CHEMBL4822	Protease	0.118883306718	177 / 17
Xanthine dehydrogenase	XDH	P47989	CHEMBL1929	Oxidoreductase	0.118883306718	3 / 20
DNA topoisomerase II alpha	TOP2A	P11388	CHEMBL1806	Isomerase	0.118883306718	0 / 1
Glyoxalase I	GLO1	Q04760	CHEMBL2424	Enzyme	0.118883306718	0 / 4
Carbonic anhydrase III	CA3	P07451	CHEMBL2885	Lyase	0.118883306718	0 / 1
Arachidonate 12-lipoxygenase	ALOX12	P18054	CHEMBL3687	Enzyme	0.118883306718	0 / 3
Phospholipase A2 group 1B	PLA2G1B	P04054	CHEMBL4426	Enzyme	0.118883306718	0 / 1
DNA-(apurinic or apyrimidinic site) lyase	APEX1	P27695	CHEMBL5619	Enzyme	0.118883306718	0 / 1
Aldo-keto reductase family 1 member C2 (by homology)	AKR1C2	P52895	CHEMBL5847	Enzyme	0.118883306718	0 / 1
Aldo-keto reductase family 1 member C1 (by homology)	AKR1C1	Q04828	CHEMBL5905	Enzyme	0.118883306718	0 / 1
Aldo-keto reductase family 1 member C4 (by homology)	AKR1C4	P17516	CHEMBL4999	Enzyme	0.118883306718	0 / 1
Aldehyde reductase (by homology)	AKR1A1	P14550	CHEMBL2246	Enzyme	0.118883306718	0 / 1
Dopamine D4 receptor	DRD4	P21917	CHEMBL219	Family A G protein-coupled receptor	0.118883306718	82 / 1
Matrix metalloproteinase 2	MMP2	P08253	CHEMBL333	Protease	0.118883306718	185 / 2
Multidrug resistance-associated protein 1	ABCC1	P33527	CHEMBL3004	Primary active transporter	0.118883306718	16 / 11
Cyclin-dependent kinase 5/CDK5 activator 1	CDK5R1 CDK5	Q15078 Q00535	CHEMBL1907600	Kinase	0.118883306718	154 / 9
Insulin-like growth factor I receptor	IGF1R	P08069	CHEMBL1957	Kinase	0.118883306718	190 / 3
Monoamine oxidase A	MAOA	P21397	CHEMBL1951	Oxidoreductase	0.118883306718	63 / 6
Carbonic anhydrase VI	CA6	P23280	CHEMBL3025	Lyase	0.118883306718	29 / 1
Carbonic anhydrase XIII	CA13	Q8N1Q1	CHEMBL3912	Lyase	0.118883306718	34 / 3
Matrix metalloproteinase 9	MMP9	P14780	CHEMBL321	Protease	0.118883306718	190 / 2
Nitric oxide synthase, inducible (by homology)	NOS2	P35228	CHEMBL4481	Enzyme	0.118883306718	51 / 3
Insulin receptor	INSR	P06213	CHEMBL1981	Kinase	0.118883306718	75 / 1
Matrix metalloproteinase 3	MMP3	P08254	CHEMBL283	Protease	0.118883306718	64 / 1
Carbonic anhydrase XIV	CA14	Q9ULX7	CHEMBL3510	Lyase	0.118883306718	19 / 1
Aldo-keto-reductase family 1 member C3	AKR1C3	P42330	CHEMBL4681	Enzyme	0.118883306718	2 / 1
Cytochrome P450 19A1	CYP19A1	P11511	CHEMBL1978	Cytochrome P450	0.118883306718	46 / 15
Arginase-1 (by homology)	ARG1	P05089	CHEMBL1075097	Enzyme	0.118883306718	0 / 2
Telomerase reverse transcriptase	TERT	O14746	CHEMBL2916	Enzyme	0.118883306718	25 / 22
Myosin light chain kinase, smooth muscle	MYLK	Q15746	CHEMBL2428	Kinase	0.118883306718	9 / 1
NUAK family SNF1-like kinase 1	NUAK1	O60285	CHEMBL5784	Kinase	0.118883306718	2 / 2
Vasopressin V2 receptor	AVPR2	P30518	CHEMBL1790	Family A G protein-coupled receptor	0.118883306718	53 / 1
Estradiol 17-beta-dehydrogenase 2	HSD17B2	P37059	CHEMBL2789	Enzyme	0.118883306718	31 / 3
6-phosphofructo-2-kinase/fructose-2,6-bisphosphatase 3	PFKFB3	Q16875	CHEMBL2331053	Enzyme	0.118883306718	105 / 1
Carbonic anhydrase VA	CA5A	P35218	CHEMBL4789	Lyase	0.118883306718	8 / 1
Cyclin-dependent kinase 1/cyclin B	CCNB3 CDK1 CCNB1 CCNB2	Q8WWL7 P06493 P14635 O95067	CHEMBL2094127	Other cytosolic protein	0.118883306718	42 / 4
Arachidonate 15-lipoxygenase	ALOX15	P16050	CHEMBL2903	Enzyme	0.118883306718	7 / 4
Death-associated protein kinase 1	DAPK1	P53355	CHEMBL2558	Kinase	0.118883306718	1 / 2
Liver glycogen phosphorylase	PYGL	P06737	CHEMBL2568	Enzyme	0.118883306718	9 / 1
Protein kinase N1	PKN1	Q16512	CHEMBL3384	Kinase	0.118883306718	1 / 2
Serine/threonine-protein kinase NEK6	NEK6	Q9HC98	CHEMBL4309	Kinase	0.118883306718	1 / 2
Macrophage colony stimulating factor receptor	CSF1R	P07333	CHEMBL1844	Kinase	0.118883306718	119 / 0
Platelet-derived growth factor receptor beta	PDGFRB	P09619	CHEMBL1913	Kinase	0.118883306718	124 / 0
Vascular endothelial growth factor receptor 3	FLT4	P35916	CHEMBL1955	Kinase	0.118883306718	46 / 0
Receptor-type tyrosine-protein phosphatase S	PTPRS	Q13332	CHEMBL2396508	Phosphatase	0.118883306718	0 / 8
DNA-3-methyladenine glycosylase	MPG	P29372	CHEMBL3396943	Enzyme	0.118883306718	0 / 1
Phosphodiesterase 5A	PDE5A	O76074	CHEMBL1827	Phosphodiesterase	0.118883306718	227 / 8
Ornithine decarboxylase	ODC1	P11926	CHEMBL1869	Lyase	0.118883306718	1 / 1
Interleukin-8 receptor A	CXCR1	P25024	CHEMBL4029	Family A G protein-coupled receptor	0.118883306718	8 / 1
Ribosomal protein S6 kinase (P70S6K)	RPS6KB2 RPS6KB1	Q9UBS0 P23443	CHEMBL2111330	Kinase	0.118883306718	1 / 0
c-Jun N-terminal kinase 1	MAPK8	P45983	CHEMBL2276	Kinase	0.118883306718	249 / 0
c-Jun N-terminal kinase 3	MAPK10	P53779	CHEMBL2637	Kinase	0.118883306718	159 / 0
c-Jun N-terminal kinase 2	MAPK9	P45984	CHEMBL4179	Kinase	0.118883306718	88 / 0
Serine/threonine-protein kinase D2	PRKD2	Q9BZL6	CHEMBL4900	Kinase	0.118883306718	3 / 0
