# Supplementary material for: A Network Pharmacology-Based Study on Irritable Bowel Syndrome Prevention and Treatment Utilizing Shenling Baizhu Powder
Source: Biomed Res Int. 2021 Nov 23;2021:4579850. doi: 10.1155/2021/4579850 (PMC8632384; doi:10.1155/2021/4579850)
Supplement: Supplementary Materials — Please find detailed data in the supplementary file, including the original data of SymMap, metabolomics, and molecular docking of Shenling Baizhu powder. “Shenling Baizhu powder SymMap” includes all herbal targets and combined targets. “Shenling Baizhu powder metabolomics” includes two-dimensional structural data analysis. “Molecular docking” involves molecule-target docking and the results. [file 4579850.f1.zip › Data in brief/2. Shenling Baizhu powder Metabolomics/Analysis data.xlsx]

## Sheet: 参苓白术散分子靶标
Source.Name	Target	Common name	Uniprot ID	ChEMBL ID	Target Class	Probability*	Known actives (3D/2D)
1.csv	GABA transporter 1	SLC6A1	P30531	CHEMBL1903	Electrochemical transporter	1	5 / 1聽聽聽聽聽
1.csv	GABA-A receptor; alpha-1/beta-2/gamma-2	GABRA1 GABRB2 GABRG2	P14867 P47870 P18507	CHEMBL2095172	Ligand-gated ion channel	1	1 / 1聽聽聽聽聽
1.csv	GABA A receptor alpha-3/beta-2/gamma-2	GABRA3 GABRB2 GABRG2	P34903 P47870 P18507	CHEMBL2111339	Ligand-gated ion channel	1	2 / 1聽聽聽聽聽
1.csv	GABA A receptor alpha-2/beta-2/gamma-2	GABRA2 GABRB2 GABRG2	P47869 P47870 P18507	CHEMBL2111413	Ligand-gated ion channel	1	2 / 1聽聽聽聽聽
1.csv	GABA-B receptor	GABBR2 GABBR1	O75899 Q9UBS5	CHEMBL2111463	Family C G protein-coupled receptor	1	5 / 1聽聽聽聽聽
1.csv	GABA receptor rho-1 subunit	GABRR1	P24046	CHEMBL3561	Ligand-gated ion channel	1	2 / 1聽聽聽聽聽
1.csv	GABA transporter 3	SLC6A11	P48066	CHEMBL5208	Electrochemical transporter	1	1 / 1聽聽聽聽聽
1.csv	GABA transporter 2 (by homology)	SLC6A13	Q9NSD5	CHEMBL4535	Electrochemical transporter	1	1 / 1聽聽聽聽聽
1.csv	Betaine transporter	SLC6A12	P48065	CHEMBL3715	Electrochemical transporter	0.125818	3 / 3聽聽聽聽聽
1.csv	Glutamate receptor ionotropic kainate 1	GRIK1	P39086	CHEMBL1918	Ligand-gated ion channel	0.0339707	0 / 10聽聽聽聽聽
1.csv	Glutamate receptor ionotropic, AMPA 1	GRIA1	P42261	CHEMBL2009	Ligand-gated ion channel	0.0339707	0 / 1聽聽聽聽聽
1.csv	Glutamate receptor ionotropic kainate 5	GRIK5	Q16478	CHEMBL2675	Ligand-gated ion channel	0.0339707	0 / 1聽聽聽聽聽
1.csv	Excitatory amino acid transporter 3	SLC1A1	P43005	CHEMBL2721	Electrochemical transporter	0.0339707	0 / 3聽聽聽聽聽
1.csv	Metabotropic glutamate receptor 4	GRM4	Q14833	CHEMBL2736	Family C G protein-coupled receptor	0.0339707	0 / 3聽聽聽聽聽
1.csv	Glutamate receptor ionotropic, AMPA 4	GRIA4	P48058	CHEMBL3190	Ligand-gated ion channel	0.0339707	0 / 1聽聽聽聽聽
1.csv	Metabotropic glutamate receptor 5	GRM5	P41594	CHEMBL3227	Family C G protein-coupled receptor	0.0339707	0 / 4聽聽聽聽聽
1.csv	Metabotropic glutamate receptor 8	GRM8	O00222	CHEMBL3228	Family C G protein-coupled receptor	0.0339707	0 / 3聽聽聽聽聽
1.csv	Glutamate receptor ionotropic kainate 2	GRIK2	Q13002	CHEMBL3683	Ligand-gated ion channel	0.0339707	0 / 8聽聽聽聽聽
1.csv	Glutamate receptor ionotropic kainate 3	GRIK3	Q13003	CHEMBL3684	Ligand-gated ion channel	0.0339707	0 / 1聽聽聽聽聽
1.csv	Metabotropic glutamate receptor 1	GRM1	Q13255	CHEMBL3772	Family C G protein-coupled receptor	0.0339707	0 / 4聽聽聽聽聽
1.csv	Metabotropic glutamate receptor 7	GRM7	Q14831	CHEMBL3777	Family C G protein-coupled receptor	0.0339707	0 / 1聽聽聽聽聽
1.csv	Glutamate receptor ionotropic, AMPA 2	GRIA2	P42262	CHEMBL4016	Ligand-gated ion channel	0.0339707	0 / 1聽聽聽聽聽
1.csv	Histone deacetylase 3	HDAC3	O15379	CHEMBL1829	Eraser	0.0238327	0 / 1聽聽聽聽聽
1.csv	Gamma-butyrobetaine dioxygenase	BBOX1	O75936	CHEMBL2163175	Enzyme	0.0238327	0 / 11聽聽聽聽聽
1.csv	Gamma-amino-N-butyrate transaminase	ABAT	P80404	CHEMBL2044	Transferase	0.0238327	2 / 0聽聽聽聽聽
1.csv	Carnitine palmitoyltransferase 2	CPT2	P23786	CHEMBL3238	Enzyme	0	0 / 1聽聽聽聽聽
1.csv	Lysine-specific demethylase 4D-like	KDM4E	B2RXH2	CHEMBL1293226	Eraser	0	0 / 3聽聽聽聽聽
1.csv	Lysine-specific demethylase 2A	KDM2A	Q9Y2K7	CHEMBL1938210	Eraser	0	0 / 4聽聽聽聽聽
1.csv	Lysine-specific demethylase 6B	KDM6B	O15054	CHEMBL1938211	Eraser	0	0 / 1聽聽聽聽聽
1.csv	Histone lysine demethylase PHF8	PHF8	Q9UPP1	CHEMBL1938212	Eraser	0	0 / 4聽聽聽聽聽
1.csv	Lysine-specific demethylase 5C	KDM5C	P41229	CHEMBL2163176	Eraser	0	0 / 3聽聽聽聽聽
1.csv	Egl nine homolog 1	EGLN1	Q9GZT9	CHEMBL5697	Oxidoreductase	0	1 / 1聽聽聽聽聽
1.csv	Metabotropic glutamate receptor 3	GRM3	Q14832	CHEMBL2888	Family C G protein-coupled receptor	0	2 / 11聽聽聽聽聽
1.csv	Metabotropic glutamate receptor 2	GRM2	Q14416	CHEMBL5137	Family C G protein-coupled receptor	0	3 / 18聽聽聽聽聽
1.csv	GABA-B receptor (by homology)	GABBR1	Q9UBS5	CHEMBL2064	Family C G protein-coupled receptor	0	1 / 0聽聽聽聽聽
1.csv	Metabotropic glutamate receptor 6	GRM6	O15303	CHEMBL4573	Family C G protein-coupled receptor	0	1 / 8聽聽聽聽聽
1.csv	Adenosine A3 receptor	ADORA3	P0DMS8	CHEMBL256	Family A G protein-coupled receptor	0	1 / 1聽聽聽聽聽
1.csv	Aminopeptidase N	ANPEP	P15144	CHEMBL1907	Protease	0	1 / 2聽聽聽聽聽
1.csv	Aminopeptidase A	ENPEP	Q07075	CHEMBL3439	Protease	0	2 / 10聽聽聽聽聽
1.csv	Plasminogen	PLG	P00747	CHEMBL1801	Protease	0	0 / 1聽聽聽聽聽
1.csv	Leukotriene A4 hydrolase	LTA4H	P09960	CHEMBL4618	Protease	0	0 / 1聽聽聽聽聽
1.csv	Excitatory amino acid transporter 2	SLC1A2	P43004	CHEMBL4973	Electrochemical transporter	0	0 / 3聽聽聽聽聽
1.csv	Voltage-gated calcium channel alpha2/delta subunit 1	CACNA2D1	P54289	CHEMBL1919	Calcium channel auxiliary subunit alpha2delta family	0	1 / 4聽聽聽聽聽
1.csv	Leucine aminopeptidase	LAP3	P28838	CHEMBL3965	Protease	0	0 / 1聽聽聽聽聽
1.csv	Matrix metalloproteinase 2	MMP2	P08253	CHEMBL333	Protease	0	1 / 0聽聽聽聽聽
1.csv	Testis-specific androgen-binding protein	SHBG	P04278	CHEMBL3305	Secreted protein	0	0 / 1聽聽聽聽聽
1.csv	Carbonic anhydrase II	CA2	P00918	CHEMBL205	Lyase	0	2 / 0聽聽聽聽聽
1.csv	Carbonic anhydrase I	CA1	P00915	CHEMBL261	Lyase	0	2 / 0聽聽聽聽聽
1.csv	Carbonic anhydrase XII	CA12	O43570	CHEMBL3242	Lyase	0	2 / 0聽聽聽聽聽
1.csv	Carbonic anhydrase IX	CA9	Q16790	CHEMBL3594	Lyase	0	2 / 0聽聽聽聽聽
1.csv	Lysine-specific demethylase 7A/7B	KDM7A	Q6ZMT4	CHEMBL2163177	Eraser	0	0 / 1聽聽聽聽聽
1.csv	Androgen Receptor	AR	P10275	CHEMBL1871	Nuclear receptor	0	0 / 1聽聽聽聽聽
1.csv	CDC45-related protein	CDC45	O75419	CHEMBL3040	Other nuclear protein	0	0 / 1聽聽聽聽聽
1.csv	Leukocyte common antigen	PTPRC	P08575	CHEMBL3243	Enzyme	0	0 / 1聽聽聽聽聽
1.csv	Dual specificity phosphatase Cdc25A	CDC25A	P30304	CHEMBL3775	Phosphatase	0	0 / 1聽聽聽聽聽
1.csv	Solute carrier family 22 member 6 (by homology)	SLC22A6	Q4U2R8	CHEMBL1641347	Electrochemical transporter	0	0 / 2聽聽聽聽聽
1.csv	Carboxypeptidase B2 isoform A	CPB2	Q96IY4	CHEMBL3419	Protease	0	0 / 1聽聽聽聽聽
1.csv	Xaa-Pro dipeptidase	PEPD	P12955	CHEMBL4185	Protease	0	0 / 1聽聽聽聽聽
1.csv	11-beta-hydroxysteroid dehydrogenase 1	HSD11B1	P28845	CHEMBL4235	Enzyme	0	0 / 2聽聽聽聽聽
1.csv	Fatty acid binding protein adipocyte	FABP4	P15090	CHEMBL2083	Fatty acid binding protein family	0	0 / 1聽聽聽聽聽
1.csv	Peroxisome proliferator-activated receptor alpha	PPARA	Q07869	CHEMBL239	Nuclear receptor	0	0 / 3聽聽聽聽聽
1.csv	Fatty acid binding protein muscle	FABP3	P05413	CHEMBL3344	Fatty acid binding protein family	0	0 / 1聽聽聽聽聽
1.csv	Fatty acid binding protein epidermal	FABP5	Q01469	CHEMBL3674	Fatty acid binding protein family	0	0 / 1聽聽聽聽聽
1.csv	Peroxisome proliferator-activated receptor delta	PPARD	Q03181	CHEMBL3979	Nuclear receptor	0	0 / 2聽聽聽聽聽
1.csv	Free fatty acid receptor 1	FFAR1	O14842	CHEMBL4422	Family A G protein-coupled receptor	0	0 / 1聽聽聽聽聽
1.csv	Fatty acid binding protein intestinal	FABP2	P12104	CHEMBL4879	Fatty acid binding protein family	0	0 / 1聽聽聽聽聽
1.csv	HMG-CoA reductase	HMGCR	P04035	CHEMBL402	Oxidoreductase	0	0 / 1聽聽聽聽聽
1.csv	Aminopeptidase B	RNPEP	Q9H4A4	CHEMBL2432	Protease	0	0 / 1聽聽聽聽聽
1.csv	Carboxypeptidase A1	CPA1	P15085	CHEMBL2088	Protease	0	0 / 1聽聽聽聽聽
1.csv	Ornithine decarboxylase	ODC1	P11926	CHEMBL1869	Lyase	0	1 / 1聽聽聽聽聽
10.csv	Egl nine homolog 1	EGLN1	Q9GZT9	CHEMBL5697	Oxidoreductase	0.0649511	0 / 2聽聽聽聽聽
10.csv	ATP-citrate synthase	ACLY	P53396	CHEMBL3720	Enzyme	0.0544879	0 / 1聽聽聽聽聽
10.csv	Neuronal acetylcholine receptor protein alpha-7 subunit (by homology)	CHRNA7	P36544	CHEMBL2492	Ligand-gated ion channel	0.0238327	0 / 2聽聽聽聽聽
10.csv	Squalene synthetase (by homology)	FDFT1	P37268	CHEMBL3338	Enzyme	0.0238327	0 / 1聽聽聽聽聽
10.csv	Histone deacetylase 3	HDAC3	O15379	CHEMBL1829	Eraser	0	0 / 1聽聽聽聽聽
10.csv	Aldose reductase	AKR1B1	P15121	CHEMBL1900	Enzyme	0	0 / 1聽聽聽聽聽
10.csv	HMG-CoA reductase	HMGCR	P04035	CHEMBL402	Oxidoreductase	0	0 / 1聽聽聽聽聽
10.csv	Excitatory amino acid transporter 3	SLC1A1	P43005	CHEMBL2721	Electrochemical transporter	0	0 / 1聽聽聽聽聽
10.csv	Excitatory amino acid transporter 2	SLC1A2	P43004	CHEMBL4973	Electrochemical transporter	0	0 / 1聽聽聽聽聽
10.csv	Hydroxyacid oxidase 1	HAO1	Q9UJM8	CHEMBL4229	Enzyme	0	0 / 1聽聽聽聽聽
10.csv	Lysine-specific demethylase 2A	KDM2A	Q9Y2K7	CHEMBL1938210	Eraser	0	0 / 1聽聽聽聽聽
10.csv	Histone lysine demethylase PHF8	PHF8	Q9UPP1	CHEMBL1938212	Eraser	0	0 / 1聽聽聽聽聽
10.csv	Lysine-specific demethylase 5C	KDM5C	P41229	CHEMBL2163176	Eraser	0	0 / 1聽聽聽聽聽
10.csv	Prostanoid EP2 receptor	PTGER2	P43116	CHEMBL1881	Family A G protein-coupled receptor	0	0 / 1聽聽聽聽聽
10.csv	Prostanoid FP receptor	PTGFR	P43088	CHEMBL1987	Family A G protein-coupled receptor	0	0 / 1聽聽聽聽聽
10.csv	Protein farnesyltransferase	FNTA FNTB	P49354 P49356	CHEMBL2094108	Enzyme	0	0 / 3聽聽聽聽聽
10.csv	Niemann-Pick C1-like protein 1	NPC1L1	Q9UHC9	CHEMBL2027	Other membrane protein	0	0 / 1聽聽聽聽聽
10.csv	UDP-glucuronosyltransferase 2B7	UGT2B7	P16662	CHEMBL4370	Enzyme	0	0 / 2聽聽聽聽聽
10.csv	GABA transporter 1	SLC6A1	P30531	CHEMBL1903	Electrochemical transporter	0	0 / 1聽聽聽聽聽
10.csv	GABA-A receptor; alpha-1/beta-2/gamma-2	GABRA1 GABRB2 GABRG2	P14867 P47870 P18507	CHEMBL2095172	Ligand-gated ion channel	0	0 / 1聽聽聽聽聽
10.csv	GABA A receptor alpha-3/beta-2/gamma-2	GABRA3 GABRB2 GABRG2	P34903 P47870 P18507	CHEMBL2111339	Ligand-gated ion channel	0	0 / 1聽聽聽聽聽
10.csv	GABA A receptor alpha-2/beta-2/gamma-2	GABRA2 GABRB2 GABRG2	P47869 P47870 P18507	CHEMBL2111413	Ligand-gated ion channel	0	0 / 1聽聽聽聽聽
10.csv	GABA-B receptor	GABBR2 GABBR1	O75899 Q9UBS5	CHEMBL2111463	Family C G protein-coupled receptor	0	0 / 1聽聽聽聽聽
10.csv	GABA receptor rho-1 subunit	GABRR1	P24046	CHEMBL3561	Ligand-gated ion channel	0	0 / 1聽聽聽聽聽
10.csv	GABA transporter 3	SLC6A11	P48066	CHEMBL5208	Electrochemical transporter	0	0 / 1聽聽聽聽聽
10.csv	Solute carrier family 22 member 6 (by homology)	SLC22A6	Q4U2R8	CHEMBL1641347	Electrochemical transporter	0	0 / 2聽聽聽聽聽
10.csv	GABA transporter 2 (by homology)	SLC6A13	Q9NSD5	CHEMBL4535	Electrochemical transporter	0	0 / 1聽聽聽聽聽
10.csv	Carnitine O-palmitoyltransferase 1, liver isoform (by homology)	CPT1A	P50416	CHEMBL1293194	Enzyme	0	0 / 2聽聽聽聽聽
10.csv	Glucose-6-phosphate 1-dehydrogenase	G6PD	P11413	CHEMBL5347	Enzyme	0	0 / 1聽聽聽聽聽
10.csv	Fatty acid binding protein adipocyte	FABP4	P15090	CHEMBL2083	Fatty acid binding protein family	0	0 / 1聽聽聽聽聽
10.csv	Peroxisome proliferator-activated receptor alpha	PPARA	Q07869	CHEMBL239	Nuclear receptor	0	0 / 3聽聽聽聽聽
10.csv	Fatty acid binding protein muscle	FABP3	P05413	CHEMBL3344	Fatty acid binding protein family	0	0 / 1聽聽聽聽聽
10.csv	Fatty acid binding protein epidermal	FABP5	Q01469	CHEMBL3674	Fatty acid binding protein family	0	0 / 1聽聽聽聽聽
10.csv	Peroxisome proliferator-activated receptor delta	PPARD	Q03181	CHEMBL3979	Nuclear receptor	0	0 / 2聽聽聽聽聽
10.csv	Free fatty acid receptor 1	FFAR1	O14842	CHEMBL4422	Family A G protein-coupled receptor	0	0 / 1聽聽聽聽聽
10.csv	Fatty acid binding protein intestinal	FABP2	P12104	CHEMBL4879	Fatty acid binding protein family	0	0 / 1聽聽聽聽聽
11.csv	Hydroxycarboxylic acid receptor 2	HCAR2	Q8TDS4	CHEMBL3785	Family A G protein-coupled receptor	0.0743165	0 / 1聽聽聽聽聽
11.csv	D-aspartate oxidase	DDO	Q99489	CHEMBL5887	Oxidoreductase	0.0443083	0 / 1聽聽聽聽聽
11.csv	Matrix metalloproteinase 9	MMP9	P14780	CHEMBL321	Protease	0.0238327	2 / 0聽聽聽聽聽
11.csv	Matrix metalloproteinase 2	MMP2	P08253	CHEMBL333	Protease	0.0238327	10 / 0聽聽聽聽聽
11.csv	NAD-dependent deacetylase sirtuin 3	SIRT3	Q9NTG7	CHEMBL4461	Eraser	0	0 / 1聽聽聽聽聽
11.csv	NAD-dependent deacetylase sirtuin 2	SIRT2	Q8IXJ6	CHEMBL4462	Eraser	0	0 / 1聽聽聽聽聽
11.csv	Carbonic anhydrase II	CA2	P00918	CHEMBL205	Lyase	0	8 / 0聽聽聽聽聽
11.csv	Carbonic anhydrase I	CA1	P00915	CHEMBL261	Lyase	0	8 / 0聽聽聽聽聽
11.csv	Matrix metalloproteinase 3	MMP3	P08254	CHEMBL283	Protease	0	2 / 0聽聽聽聽聽
11.csv	Carbonic anhydrase XII	CA12	O43570	CHEMBL3242	Lyase	0	8 / 0聽聽聽聽聽
11.csv	Matrix metalloproteinase 1	MMP1	P03956	CHEMBL332	Protease	0	2 / 0聽聽聽聽聽
11.csv	Carbonic anhydrase IX	CA9	Q16790	CHEMBL3594	Lyase	0	8 / 0聽聽聽聽聽
11.csv	Inosine-5'-monophosphate dehydrogenase 2	IMPDH2	P12268	CHEMBL2002	Oxidoreductase	0	0 / 1聽聽聽聽聽
11.csv	Protein-tyrosine phosphatase 1B	PTPN1	P18031	CHEMBL335	Phosphatase	0	0 / 1聽聽聽聽聽
11.csv	Muscarinic acetylcholine receptor M1	CHRM1	P11229	CHEMBL216	Family A G protein-coupled receptor	0	0 / 8聽聽聽聽聽
11.csv	Prolyl 4-hydroxylase subunit alpha-1	P4HA1	P13674	CHEMBL1250350	Enzyme	0	0 / 3聽聽聽聽聽
11.csv	Hypoxia-inducible factor prolyl 4-hydroxylase	P4HTM	Q9NXG6	CHEMBL3047	Enzyme	0	0 / 2聽聽聽聽聽
11.csv	Matrix metalloproteinase 8	MMP8	P22894	CHEMBL4588	Protease	0	1 / 0聽聽聽聽聽
11.csv	Serine/threonine-protein kinase PLK1	PLK1	P53350	CHEMBL3024	Kinase	0	0 / 4聽聽聽聽聽
11.csv	Solute carrier family 22 member 12	SLC22A12	Q96S37	CHEMBL6120	Electrochemical transporter	0	0 / 3聽聽聽聽聽
11.csv	Fatty acid binding protein adipocyte	FABP4	P15090	CHEMBL2083	Fatty acid binding protein family	0	0 / 1聽聽聽聽聽
11.csv	Cytochrome P450 2A6	CYP2A6	P11509	CHEMBL5282	Cytochrome P450	0	0 / 2聽聽聽聽聽
11.csv	Cannabinoid receptor 1 (by homology)	CNR1	P21554	CHEMBL218	Family A G protein-coupled receptor	0	0 / 7聽聽聽聽聽
11.csv	Cannabinoid receptor 2	CNR2	P34972	CHEMBL253	Family A G protein-coupled receptor	0	0 / 15聽聽聽聽聽
11.csv	Lysine-specific demethylase 4D-like	KDM4E	B2RXH2	CHEMBL1293226	Eraser	0	0 / 1聽聽聽聽聽
11.csv	Lysine-specific demethylase 4A	KDM4A	O75164	CHEMBL5896	Eraser	0	0 / 1聽聽聽聽聽
11.csv	Lysine-specific demethylase 4D	KDM4D	Q6B0I6	CHEMBL6138	Eraser	0	0 / 1聽聽聽聽聽
11.csv	Lysine-specific demethylase 4C	KDM4C	Q9H3R0	CHEMBL6175	Eraser	0	0 / 1聽聽聽聽聽
11.csv	Poly [ADP-ribose] polymerase-1	PARP1	P09874	CHEMBL3105	Enzyme	0	0 / 7聽聽聽聽聽
11.csv	Polyadenylate-binding protein 1	PABPC1	P11940	CHEMBL1293286	Unclassified protein	0	0 / 2聽聽聽聽聽
11.csv	Lysine-specific demethylase 2A	KDM2A	Q9Y2K7	CHEMBL1938210	Eraser	0	1 / 0聽聽聽聽聽
11.csv	Histone lysine demethylase PHF8	PHF8	Q9UPP1	CHEMBL1938212	Eraser	0	1 / 0聽聽聽聽聽
11.csv	Lysine-specific demethylase 5C	KDM5C	P41229	CHEMBL2163176	Eraser	0	1 / 0聽聽聽聽聽
11.csv	Protein tyrosine kinase 2 beta	PTK2B	Q14289	CHEMBL5469	Kinase	0	1 / 0聽聽聽聽聽
11.csv	3-hydroxyanthranilate 3,4-dioxygenase	HAAO	P46952	CHEMBL3108657	Enzyme	0	0 / 1聽聽聽聽聽
11.csv	Serine/threonine-protein kinase PIM1	PIM1	P11309	CHEMBL2147	Kinase	0	0 / 12聽聽聽聽聽
11.csv	Serine/threonine-protein kinase PIM2	PIM2	Q9P1W9	CHEMBL4523	Kinase	0	0 / 2聽聽聽聽聽
11.csv	Serine/threonine-protein kinase PIM3	PIM3	Q86V86	CHEMBL5407	Kinase	0	0 / 13聽聽聽聽聽
11.csv	Muscarinic acetylcholine receptor M2	CHRM2	P08172	CHEMBL211	Family A G protein-coupled receptor	0	0 / 1聽聽聽聽聽
11.csv	Acetylcholinesterase (by homology)	ACHE	P22303	CHEMBL220	Hydrolase	0	0 / 1聽聽聽聽聽
11.csv	Nuclear receptor subfamily 4 group A member 1	NR4A1	P22736	CHEMBL1293229	Nuclear receptor	0	0 / 2聽聽聽聽聽
11.csv	Anandamide amidohydrolase	FAAH	O00519	CHEMBL2243	Enzyme	0	0 / 1聽聽聽聽聽
11.csv	Alpha-1d adrenergic receptor	ADRA1D	P25100	CHEMBL223	Family A G protein-coupled receptor	0	0 / 1聽聽聽聽聽
11.csv	Cytochrome P450 19A1	CYP19A1	P11511	CHEMBL1978	Cytochrome P450	0	0 / 4聽聽聽聽聽
11.csv	Cytochrome P450 11B2	CYP11B2	P19099	CHEMBL2722	Cytochrome P450	0	0 / 3聽聽聽聽聽
11.csv	C-C chemokine receptor type 2	CCR2	P41597	CHEMBL4015	Family A G protein-coupled receptor	0	0 / 2聽聽聽聽聽
11.csv	Neuronal acetylcholine receptor; alpha4/beta2	CHRNA4 CHRNB2	P43681 P17787	CHEMBL1907589	Ligand-gated ion channel	0	0 / 3聽聽聽聽聽
11.csv	Neuronal acetylcholine receptor; alpha3/beta4	CHRNA3 CHRNB4	P32297 P30926	CHEMBL1907594	Ligand-gated ion channel	0	0 / 1聽聽聽聽聽
11.csv	Histone deacetylase 8	HDAC8	Q9BY41	CHEMBL3192	Eraser	0	0 / 1聽聽聽聽聽
11.csv	Histone deacetylase 1	HDAC1	Q13547	CHEMBL325	Eraser	0	0 / 3聽聽聽聽聽
11.csv	Inhibitor of nuclear factor kappa B kinase beta subunit	IKBKB	O14920	CHEMBL1991	Kinase	0	0 / 3聽聽聽聽聽
11.csv	Nitric-oxide synthase, brain	NOS1	P29475	CHEMBL3568	Enzyme	0	0 / 2聽聽聽聽聽
11.csv	Nitric-oxide synthase, endothelial	NOS3	P29474	CHEMBL4803	Enzyme	0	0 / 3聽聽聽聽聽
11.csv	Nitric oxide synthase, inducible	NOS2	P35228	CHEMBL4481	Enzyme	0	0 / 2聽聽聽聽聽
11.csv	Stem cell growth factor receptor	KIT	P10721	CHEMBL1936	Kinase	0	0 / 1聽聽聽聽聽
11.csv	Platelet-derived growth factor receptor alpha	PDGFRA	P16234	CHEMBL2007	Kinase	0	0 / 1聽聽聽聽聽
11.csv	Fibroblast growth factor receptor 3	FGFR3	P22607	CHEMBL2742	Kinase	0	0 / 1聽聽聽聽聽
11.csv	Fibroblast growth factor receptor 1	FGFR1	P11362	CHEMBL3650	Kinase	0	0 / 1聽聽聽聽聽
11.csv	Serine/threonine-protein kinase/endoribonuclease IRE1	ERN1	O75460	CHEMBL1163101	Enzyme	0	0 / 1聽聽聽聽聽
11.csv	Aldose reductase	AKR1B1	P15121	CHEMBL1900	Enzyme	0	0 / 1聽聽聽聽聽
11.csv	Monoamine oxidase A	MAOA	P21397	CHEMBL1951	Oxidoreductase	0	0 / 1聽聽聽聽聽
11.csv	Farnesyl diphosphate synthase	FDPS	P14324	CHEMBL1782	Transferase	0	0 / 1聽聽聽聽聽
11.csv	Cytochrome P450 11B1	CYP11B1	P15538	CHEMBL1908	Cytochrome P450	0	0 / 2聽聽聽聽聽
11.csv	Cytochrome P450 3A4	CYP3A4	P08684	CHEMBL340	Cytochrome P450	0	0 / 1聽聽聽聽聽
11.csv	Cytochrome P450 17A1	CYP17A1	P05093	CHEMBL3522	Cytochrome P450	0	0 / 1聽聽聽聽聽
11.csv	Serine/threonine-protein kinase RAF	RAF1	P04049	CHEMBL1906	Kinase	0	0 / 1聽聽聽聽聽
11.csv	Epoxide hydrolase 1	EPHX1	P07099	CHEMBL1968	Protease	0	0 / 1聽聽聽聽聽
11.csv	Epoxide hydratase	EPHX2	P34913	CHEMBL2409	Protease	0	0 / 2聽聽聽聽聽
11.csv	Tyrosine-protein kinase JAK2	JAK2	O60674	CHEMBL2971	Kinase	0	0 / 1聽聽聽聽聽
11.csv	Metabotropic glutamate receptor 5 (by homology)	GRM5	P41594	CHEMBL3227	Family C G protein-coupled receptor	0	0 / 1聽聽聽聽聽
11.csv	Serine/threonine-protein kinase Chk1	CHEK1	O14757	CHEMBL4630	Kinase	0	0 / 1聽聽聽聽聽
11.csv	Sigma opioid receptor (by homology)	SIGMAR1	Q99720	CHEMBL287	Membrane receptor	0	0 / 1聽聽聽聽聽
11.csv	Scavenger receptor class B member 1	SCARB1	Q8WTV0	CHEMBL1914272	Unclassified protein	0	0 / 1聽聽聽聽聽
11.csv	Choline acetylase	CHAT	P28329	CHEMBL4039	Enzyme	0	0 / 1聽聽聽聽聽
11.csv	Dihydrofolate reductase (by homology)	DHFR	P00374	CHEMBL202	Oxidoreductase	0	0 / 1聽聽聽聽聽
11.csv	GABA-A receptor; alpha-1/beta-2/gamma-2	GABRA1 GABRB2 GABRG2	P14867 P47870 P18507	CHEMBL2095172	Ligand-gated ion channel	0	0 / 1聽聽聽聽聽
11.csv	GABA A receptor alpha-3/beta-2/gamma-2	GABRA3 GABRB2 GABRG2	P34903 P47870 P18507	CHEMBL2111339	Ligand-gated ion channel	0	0 / 1聽聽聽聽聽
11.csv	Cytochrome P450 51	CYP51A1	Q16850	CHEMBL3849	Cytochrome P450	0	0 / 1聽聽聽聽聽
11.csv	11-beta-hydroxysteroid dehydrogenase 1	HSD11B1	P28845	CHEMBL4235	Enzyme	0	0 / 1聽聽聽聽聽
11.csv	Histone deacetylase 3	HDAC3	O15379	CHEMBL1829	Eraser	0	0 / 1聽聽聽聽聽
12.csv	HMG-CoA reductase	HMGCR	P04035	CHEMBL402	Oxidoreductase	0.187831	0 / 4聽聽聽聽聽
12.csv	Solute carrier family 22 member 6 (by homology)	SLC22A6	Q4U2R8	CHEMBL1641347	Electrochemical transporter	0.105844	0 / 2聽聽聽聽聽
12.csv	ATP-citrate synthase	ACLY	P53396	CHEMBL3720	Enzyme	0.0544879	0 / 1聽聽聽聽聽
12.csv	Neuronal acetylcholine receptor protein alpha-7 subunit (by homology)	CHRNA7	P36544	CHEMBL2492	Ligand-gated ion channel	0.0443083	0 / 2聽聽聽聽聽
12.csv	Egl nine homolog 1	EGLN1	Q9GZT9	CHEMBL5697	Oxidoreductase	0.0339707	0 / 2聽聽聽聽聽
12.csv	Prostanoid EP2 receptor	PTGER2	P43116	CHEMBL1881	Family A G protein-coupled receptor	0.0238327	0 / 1聽聽聽聽聽
12.csv	Prostanoid FP receptor	PTGFR	P43088	CHEMBL1987	Family A G protein-coupled receptor	0.0238327	0 / 1聽聽聽聽聽
12.csv	Excitatory amino acid transporter 3	SLC1A1	P43005	CHEMBL2721	Electrochemical transporter	0.0238327	0 / 2聽聽聽聽聽
12.csv	Squalene synthetase (by homology)	FDFT1	P37268	CHEMBL3338	Enzyme	0.0238327	0 / 1聽聽聽聽聽
12.csv	UDP-glucuronosyltransferase 2B7	UGT2B7	P16662	CHEMBL4370	Enzyme	0.0238327	0 / 4聽聽聽聽聽
12.csv	Fatty acid binding protein adipocyte	FABP4	P15090	CHEMBL2083	Fatty acid binding protein family	0.0238327	0 / 1聽聽聽聽聽
12.csv	Peroxisome proliferator-activated receptor alpha	PPARA	Q07869	CHEMBL239	Nuclear receptor	0.0238327	0 / 3聽聽聽聽聽
12.csv	Fatty acid binding protein muscle	FABP3	P05413	CHEMBL3344	Fatty acid binding protein family	0.0238327	0 / 1聽聽聽聽聽
12.csv	Fatty acid binding protein epidermal	FABP5	Q01469	CHEMBL3674	Fatty acid binding protein family	0.0238327	0 / 1聽聽聽聽聽
12.csv	Peroxisome proliferator-activated receptor delta	PPARD	Q03181	CHEMBL3979	Nuclear receptor	0.0238327	0 / 3聽聽聽聽聽
12.csv	Free fatty acid receptor 1	FFAR1	O14842	CHEMBL4422	Family A G protein-coupled receptor	0.0238327	0 / 1聽聽聽聽聽
12.csv	Fatty acid binding protein intestinal	FABP2	P12104	CHEMBL4879	Fatty acid binding protein family	0.0238327	0 / 1聽聽聽聽聽
12.csv	Alpha-L-fucosidase I	FUCA1	P04066	CHEMBL4176	Enzyme	0	10 / 0聽聽聽聽聽
12.csv	Bile acid receptor FXR	NR1H4	Q96RI1	CHEMBL2047	Nuclear receptor	0	0 / 10聽聽聽聽聽
12.csv	G-protein coupled bile acid receptor 1	GPBAR1	Q8TDU6	CHEMBL5409	Family A G protein-coupled receptor	0	0 / 13聽聽聽聽聽
12.csv	Histone deacetylase 3	HDAC3	O15379	CHEMBL1829	Eraser	0	0 / 1聽聽聽聽聽
12.csv	11-beta-hydroxysteroid dehydrogenase 1	HSD11B1	P28845	CHEMBL4235	Enzyme	0	0 / 7聽聽聽聽聽
12.csv	G protein-coupled receptor 44	PTGDR2	Q9Y5Y4	CHEMBL5071	Family A G protein-coupled receptor	0	1 / 0聽聽聽聽聽
12.csv	Protein farnesyltransferase	FNTA FNTB	P49354 P49356	CHEMBL2094108	Enzyme	0	0 / 5聽聽聽聽聽
12.csv	Matrix metalloproteinase 2	MMP2	P08253	CHEMBL333	Protease	0	8 / 0聽聽聽聽聽
12.csv	Matrix metalloproteinase 8	MMP8	P22894	CHEMBL4588	Protease	0	2 / 0聽聽聽聽聽
12.csv	Adenosine A3 receptor	ADORA3	P0DMS8	CHEMBL256	Family A G protein-coupled receptor	0	0 / 1聽聽聽聽聽
12.csv	Metabotropic glutamate receptor 4	GRM4	Q14833	CHEMBL2736	Family C G protein-coupled receptor	0	0 / 1聽聽聽聽聽
12.csv	Metabotropic glutamate receptor 3	GRM3	Q14832	CHEMBL2888	Family C G protein-coupled receptor	0	0 / 2聽聽聽聽聽
12.csv	Metabotropic glutamate receptor 5	GRM5	P41594	CHEMBL3227	Family C G protein-coupled receptor	0	0 / 3聽聽聽聽聽
12.csv	Metabotropic glutamate receptor 8	GRM8	O00222	CHEMBL3228	Family C G protein-coupled receptor	0	0 / 2聽聽聽聽聽
12.csv	Glutamate receptor ionotropic kainate 2	GRIK2	Q13002	CHEMBL3683	Ligand-gated ion channel	0	0 / 5聽聽聽聽聽
12.csv	Metabotropic glutamate receptor 7	GRM7	Q14831	CHEMBL3777	Family C G protein-coupled receptor	0	0 / 1聽聽聽聽聽
12.csv	Metabotropic glutamate receptor 6	GRM6	O15303	CHEMBL4573	Family C G protein-coupled receptor	0	0 / 1聽聽聽聽聽
12.csv	Metabotropic glutamate receptor 2	GRM2	Q14416	CHEMBL5137	Family C G protein-coupled receptor	0	0 / 8聽聽聽聽聽
12.csv	Matrix metalloproteinase 9	MMP9	P14780	CHEMBL321	Protease	0	1 / 0聽聽聽聽聽
12.csv	Carbonic anhydrase XII	CA12	O43570	CHEMBL3242	Lyase	0	5 / 0聽聽聽聽聽
12.csv	Androgen Receptor	AR	P10275	CHEMBL1871	Nuclear receptor	0	0 / 4聽聽聽聽聽
12.csv	Vitamin D receptor	VDR	P11473	CHEMBL1977	Nuclear receptor	0	0 / 1聽聽聽聽聽
12.csv	Dual specificity phosphatase Cdc25A	CDC25A	P30304	CHEMBL3775	Phosphatase	0	0 / 3聽聽聽聽聽
12.csv	Aldo-keto reductase family 1 member B10	AKR1B10	O60218	CHEMBL5983	Enzyme	0	0 / 2聽聽聽聽聽
12.csv	DNA polymerase beta (by homology)	POLB	P06746	CHEMBL2392	Enzyme	0	0 / 2聽聽聽聽聽
12.csv	Angiotensin-converting enzyme	ACE	P12821	CHEMBL1808	Protease	0	2 / 0聽聽聽聽聽
12.csv	Niemann-Pick C1-like protein 1	NPC1L1	Q9UHC9	CHEMBL2027	Other membrane protein	0	0 / 2聽聽聽聽聽
12.csv	Maltase-glucoamylase	MGAM	O43451	CHEMBL2074	Hydrolase	0	14 / 0聽聽聽聽聽
12.csv	Sucrase-isomaltase	SI	P14410	CHEMBL2748	Enzyme	0	8 / 0聽聽聽聽聽
12.csv	Dipeptidyl peptidase IV	DPP4	P27487	CHEMBL284	Protease	0	0 / 1聽聽聽聽聽
12.csv	Aminopeptidase B	RNPEP	Q9H4A4	CHEMBL2432	Protease	0	0 / 1聽聽聽聽聽
12.csv	Glucose-6-phosphate 1-dehydrogenase	G6PD	P11413	CHEMBL5347	Enzyme	0	0 / 5聽聽聽聽聽
12.csv	Ceramide glucosyltransferase	UGCG	Q16739	CHEMBL2063	Transferase	0	1 / 0聽聽聽聽聽
12.csv	Fructose-1,6-bisphosphatase	FBP1	P09467	CHEMBL3975	Enzyme	0	6 / 0聽聽聽聽聽
12.csv	Kynurenine 3-monooxygenase (by homology)	KMO	O15229	CHEMBL2145	Oxidoreductase	0	7 / 0聽聽聽聽聽
12.csv	Carboxypeptidase A1	CPA1	P15085	CHEMBL2088	Protease	0	2 / 0聽聽聽聽聽
12.csv	Caspase-3	CASP3	P42574	CHEMBL2334	Protease	0	1 / 0聽聽聽聽聽
12.csv	Lysine-specific demethylase 4D-like	KDM4E	B2RXH2	CHEMBL1293226	Eraser	0	2 / 0聽聽聽聽聽
12.csv	Cytochrome P450 19A1	CYP19A1	P11511	CHEMBL1978	Cytochrome P450	0	0 / 3聽聽聽聽聽
12.csv	Corticosteroid binding globulin	SERPINA6	P08185	CHEMBL2421	Secreted protein	0	0 / 3聽聽聽聽聽
12.csv	Testis-specific androgen-binding protein	SHBG	P04278	CHEMBL3305	Secreted protein	0	0 / 10聽聽聽聽聽
12.csv	Estradiol 17-beta-dehydrogenase 3	HSD17B3	P37058	CHEMBL4234	Enzyme	0	0 / 11聽聽聽聽聽
12.csv	Beta-glucocerebrosidase	GBA	P04062	CHEMBL2179	Enzyme	0	6 / 0聽聽聽聽聽
12.csv	Alpha-galactosidase A	GLA	P06280	CHEMBL2524	Enzyme	0	4 / 0聽聽聽聽聽
12.csv	Prostaglandin E synthase	PTGES	O14684	CHEMBL5658	Enzyme	0	0 / 2聽聽聽聽聽
12.csv	Aldose reductase	AKR1B1	P15121	CHEMBL1900	Enzyme	0	4 / 0聽聽聽聽聽
12.csv	Lysosomal alpha-glucosidase	GAA	P10253	CHEMBL2608	Hydrolase	0	6 / 0聽聽聽聽聽
12.csv	Neutral alpha-glucosidase C	GANC	Q8TET4	CHEMBL2520	Enzyme	0	1 / 0聽聽聽聽聽
12.csv	Betaine transporter	SLC6A12	P48065	CHEMBL3715	Electrochemical transporter	0	0 / 2聽聽聽聽聽
12.csv	11-beta-hydroxysteroid dehydrogenase 2	HSD11B2	P80365	CHEMBL3746	Enzyme	0	0 / 1聽聽聽聽聽
12.csv	Hydroxyacid oxidase 1	HAO1	Q9UJM8	CHEMBL4229	Enzyme	0	0 / 1聽聽聽聽聽
12.csv	Neutral alpha-glucosidase AB	GANAB	Q14697	CHEMBL2519	Enzyme	0	2 / 0聽聽聽聽聽
12.csv	Solute carrier family 13 member 5	SLC13A5	Q86YT5	CHEMBL3769293	Electrochemical transporter	0	4 / 0聽聽聽聽聽
12.csv	Matrix metalloproteinase 1	MMP1	P03956	CHEMBL332	Protease	0	1 / 0聽聽聽聽聽
12.csv	Carnitine O-palmitoyltransferase 1, liver isoform (by homology)	CPT1A	P50416	CHEMBL1293194	Enzyme	0	0 / 4聽聽聽聽聽
12.csv	Liver glycogen phosphorylase	PYGL	P06737	CHEMBL2568	Enzyme	0	2 / 0聽聽聽聽聽
12.csv	Beta-glucosidase	GBA2	Q9HCG7	CHEMBL3761	Enzyme	0	1 / 0聽聽聽聽聽
12.csv	Glycogen debranching enzyme	AGL	P35573	CHEMBL5272	Enzyme	0	2 / 0聽聽聽聽聽
12.csv	Beta-galactosidase (by homology)	GLB1	P16278	CHEMBL2522	Hydrolase	0	1 / 0聽聽聽聽聽
12.csv	Alpha-L-fucosidase 2	FUCA2	Q9BTY2	CHEMBL2271	Enzyme	0	1 / 0聽聽聽聽聽
12.csv	Adenosylhomocysteinase (by homology)	AHCY	P23526	CHEMBL2664	Enzyme	0	1 / 0聽聽聽聽聽
12.csv	Plasminogen	PLG	P00747	CHEMBL1801	Protease	0	0 / 1聽聽聽聽聽
12.csv	Protein-tyrosine phosphatase 1B	PTPN1	P18031	CHEMBL335	Phosphatase	0	0 / 1聽聽聽聽聽
12.csv	Glutathione S-transferase kappa 1	GSTK1	Q9Y2Q3	CHEMBL4491	Enzyme	0	0 / 1聽聽聽聽聽
12.csv	Leukotriene A4 hydrolase	LTA4H	P09960	CHEMBL4618	Protease	0	0 / 1聽聽聽聽聽
12.csv	Uracil nucleotide/cysteinyl leukotriene receptor	GPR17	Q13304	CHEMBL1075162	Family A G protein-coupled receptor	0	2 / 0聽聽聽聽聽
12.csv	Leucine aminopeptidase	LAP3	P28838	CHEMBL3965	Protease	0	1 / 0聽聽聽聽聽
12.csv	Carbonic anhydrase I	CA1	P00915	CHEMBL261	Lyase	0	7 / 3聽聽聽聽聽
12.csv	Carbonic anhydrase IX	CA9	Q16790	CHEMBL3594	Lyase	0	6 / 2聽聽聽聽聽
12.csv	Carbonic anhydrase III	CA3	P07451	CHEMBL2885	Lyase	0	1 / 0聽聽聽聽聽
12.csv	Carbonic anhydrase XIV	CA14	Q9ULX7	CHEMBL3510	Lyase	0	1 / 0聽聽聽聽聽
12.csv	Carbonic anhydrase VB	CA5B	Q9Y2D0	CHEMBL3969	Lyase	0	1 / 0聽聽聽聽聽
12.csv	Carbonic anhydrase XIII (by homology)	CA13	Q8N1Q1	CHEMBL3912	Lyase	0	1 / 0聽聽聽聽聽
12.csv	Endothelin-converting enzyme 1	ECE1	P42892	CHEMBL4791	Protease	0	1 / 0聽聽聽聽聽
12.csv	Lysine-specific demethylase 2A	KDM2A	Q9Y2K7	CHEMBL1938210	Eraser	0	2 / 1聽聽聽聽聽
12.csv	Histone lysine demethylase PHF8	PHF8	Q9UPP1	CHEMBL1938212	Eraser	0	2 / 1聽聽聽聽聽
12.csv	Lysine-specific demethylase 5C	KDM5C	P41229	CHEMBL2163176	Eraser	0	2 / 1聽聽聽聽聽
12.csv	Neprilysin	MME	P08473	CHEMBL1944	Protease	0	2 / 0聽聽聽聽聽
12.csv	Epidermal growth factor receptor erbB1	EGFR	P00533	CHEMBL203	Kinase	0	1 / 0聽聽聽聽聽
12.csv	Aminopeptidase A	ENPEP	Q07075	CHEMBL3439	Protease	0	0 / 1聽聽聽聽聽
12.csv	Endoplasmic reticulum mannosyl-oligosaccharide 1,2-alpha-mannosidase	MAN1B1	Q9UKM7	CHEMBL2308	Enzyme	0	1 / 0聽聽聽聽聽
12.csv	Gamma-butyrobetaine dioxygenase	BBOX1	O75936	CHEMBL2163175	Enzyme	0	0 / 1聽聽聽聽聽
12.csv	CDC45-related protein	CDC45	O75419	CHEMBL3040	Other nuclear protein	0	0 / 1聽聽聽聽聽
13.csv	Carbonic anhydrase II	CA2	P00918	CHEMBL205	Lyase	0.453905	13 / 48聽聽聽聽聽
13.csv	Carbonic anhydrase I	CA1	P00915	CHEMBL261	Lyase	0.453905	13 / 47聽聽聽聽聽
13.csv	Carbonic anhydrase XII	CA12	O43570	CHEMBL3242	Lyase	0.453905	9 / 30聽聽聽聽聽
13.csv	Carbonic anhydrase IX	CA9	Q16790	CHEMBL3594	Lyase	0.453905	8 / 28聽聽聽聽聽
13.csv	Carbonic anhydrase VI	CA6	P23280	CHEMBL3025	Lyase	0.283752	4 / 5聽聽聽聽聽
13.csv	Carbonic anhydrase VII	CA7	P43166	CHEMBL2326	Lyase	0.245006	5 / 26聽聽聽聽聽
13.csv	Carbonic anhydrase XIV	CA14	Q9ULX7	CHEMBL3510	Lyase	0.245006	5 / 26聽聽聽聽聽
13.csv	Carbonic anhydrase IV	CA4	P22748	CHEMBL3729	Lyase	0.226173	3 / 4聽聽聽聽聽
13.csv	L-lactate dehydrogenase A chain	LDHA	P00338	CHEMBL4835	Enzyme	0.101229	0 / 14聽聽聽聽聽
13.csv	L-lactate dehydrogenase B chain	LDHB	P07195	CHEMBL4940	Enzyme	0.101229	0 / 11聽聽聽聽聽
13.csv	Carbonic anhydrase III	CA3	P07451	CHEMBL2885	Lyase	0.0630257	2 / 3聽聽聽聽聽
13.csv	Carbonic anhydrase VB	CA5B	Q9Y2D0	CHEMBL3969	Lyase	0.0630257	2 / 2聽聽聽聽聽
13.csv	Carbonic anhydrase VA	CA5A	P35218	CHEMBL4789	Lyase	0.0630257	2 / 3聽聽聽聽聽
13.csv	Carbonic anhydrase XIII (by homology)	CA13	Q8N1Q1	CHEMBL3912	Lyase	0.0630257	2 / 2聽聽聽聽聽
13.csv	Serum albumin	ALB	P02768	CHEMBL3253	Secreted protein	0.0535179	0 / 5聽聽聽聽聽
13.csv	Catechol O-methyltransferase (by homology)	COMT	P21964	CHEMBL2023	Transferase	0.0439186	0 / 5聽聽聽聽聽
13.csv	Apoptosis regulator Bcl-X	BCL2L1	Q07817	CHEMBL4625	Other ion channel	0.0439186	0 / 2聽聽聽聽聽
13.csv	Squalene monooxygenase (by homology)	SQLE	Q14534	CHEMBL3592	Enzyme	0.0439186	0 / 4聽聽聽聽聽
13.csv	Serine/threonine-protein kinase/endoribonuclease IRE1	ERN1	O75460	CHEMBL1163101	Enzyme	0.0439186	0 / 53聽聽聽聽聽
13.csv	Aldo-keto-reductase family 1 member C3	AKR1C3	P42330	CHEMBL4681	Enzyme	0.0439186	0 / 3聽聽聽聽聽
13.csv	G-protein coupled receptor 35	GPR35	Q9HC97	CHEMBL1293267	Family A G protein-coupled receptor	0.0439186	0 / 2聽聽聽聽聽
13.csv	Alpha-(1,3)-fucosyltransferase 7	FUT7	Q11130	CHEMBL3596077	Transferase	0.0439186	1 / 2聽聽聽聽聽
13.csv	Transthyretin	TTR	P02766	CHEMBL3194	Secreted protein	0	0 / 6聽聽聽聽聽
13.csv	Insulin-like growth factor I receptor	IGF1R	P08069	CHEMBL1957	Kinase	0	0 / 3聽聽聽聽聽
13.csv	ALK tyrosine kinase receptor	ALK	Q9UM73	CHEMBL4247	Kinase	0	0 / 3聽聽聽聽聽
13.csv	Histone deacetylase 6	HDAC6	Q9UBN7	CHEMBL1865	Eraser	0	1 / 0聽聽聽聽聽
13.csv	Histone deacetylase 8	HDAC8	Q9BY41	CHEMBL3192	Eraser	0	1 / 0聽聽聽聽聽
13.csv	Tyrosinase	TYR	P14679	CHEMBL1973	Oxidoreductase	0	0 / 3聽聽聽聽聽
13.csv	Estrogen receptor beta	ESR2	Q92731	CHEMBL242	Nuclear receptor	0	0 / 5聽聽聽聽聽
13.csv	Matrix metalloproteinase 9	MMP9	P14780	CHEMBL321	Protease	0	1 / 0聽聽聽聽聽
13.csv	Matrix metalloproteinase 1	MMP1	P03956	CHEMBL332	Protease	0	1 / 0聽聽聽聽聽
13.csv	Matrix metalloproteinase 2	MMP2	P08253	CHEMBL333	Protease	0	1 / 0聽聽聽聽聽
13.csv	Matrix metalloproteinase 8	MMP8	P22894	CHEMBL4588	Protease	0	1 / 0聽聽聽聽聽
13.csv	Aldo-keto reductase family 1 member C2	AKR1C2	P52895	CHEMBL5847	Enzyme	0	2 / 10聽聽聽聽聽
13.csv	Aldo-keto reductase family 1 member C1	AKR1C1	Q04828	CHEMBL5905	Enzyme	0	2 / 10聽聽聽聽聽
13.csv	Induced myeloid leukemia cell differentiation protein Mcl-1	MCL1	Q07820	CHEMBL4361	Other cytosolic protein	0	0 / 7聽聽聽聽聽
13.csv	Poly [ADP-ribose] polymerase-1	PARP1	P09874	CHEMBL3105	Enzyme	0	0 / 2聽聽聽聽聽
13.csv	Plasminogen activator inhibitor-1	SERPINE1	P05121	CHEMBL3475	Secreted protein	0	0 / 8聽聽聽聽聽
13.csv	DNA polymerase beta	POLB	P06746	CHEMBL2392	Enzyme	0	0 / 2聽聽聽聽聽
13.csv	Receptor-type tyrosine-protein phosphatase beta	PTPRB	P23467	CHEMBL2706	Phosphatase	0	2 / 0聽聽聽聽聽
13.csv	Serine/threonine-protein kinase Aurora-B	AURKB	Q96GD4	CHEMBL2185	Kinase	0	0 / 1聽聽聽聽聽
13.csv	Tyrosine-protein kinase SRC	SRC	P12931	CHEMBL267	Kinase	0	0 / 1聽聽聽聽聽
13.csv	Focal adhesion kinase 1	PTK2	Q05397	CHEMBL2695	Kinase	0	0 / 1聽聽聽聽聽
13.csv	Vascular endothelial growth factor receptor 2	KDR	P35968	CHEMBL279	Kinase	0	0 / 1聽聽聽聽聽
13.csv	Hepatocyte growth factor receptor	MET	P08581	CHEMBL3717	Kinase	0	0 / 2聽聽聽聽聽
13.csv	Serine/threonine-protein kinase NEK2	NEK2	P51955	CHEMBL3835	Kinase	0	0 / 1聽聽聽聽聽
13.csv	Tyrosine-protein kinase receptor UFO	AXL	P30530	CHEMBL4895	Kinase	0	0 / 2聽聽聽聽聽
13.csv	Cannabinoid receptor 2	CNR2	P34972	CHEMBL253	Family A G protein-coupled receptor	0	0 / 5聽聽聽聽聽
13.csv	Thymidylate synthase	TYMS	P04818	CHEMBL1952	Transferase	0	0 / 4聽聽聽聽聽
13.csv	Cyclooxygenase-1	PTGS1	P23219	CHEMBL221	Oxidoreductase	0	0 / 2聽聽聽聽聽
13.csv	Cyclooxygenase-2	PTGS2	P35354	CHEMBL230	Oxidoreductase	0	0 / 2聽聽聽聽聽
13.csv	T-cell protein-tyrosine phosphatase	PTPN2	P17706	CHEMBL3807	Phosphatase	0	1 / 0聽聽聽聽聽
13.csv	Steroid 5-alpha-reductase 2	SRD5A2	P31213	CHEMBL1856	Oxidoreductase	0	0 / 13聽聽聽聽聽
13.csv	Beta-glucocerebrosidase	GBA	P04062	CHEMBL2179	Enzyme	0	1 / 0聽聽聽聽聽
13.csv	Epidermal growth factor receptor erbB1	EGFR	P00533	CHEMBL203	Kinase	0	0 / 2聽聽聽聽聽
13.csv	SUMO-activating enzyme subunit 1	SAE1	Q9UBE0	CHEMBL1615388	Unclassified protein	0	0 / 2聽聽聽聽聽
13.csv	Histone acetyltransferase p300	EP300	Q09472	CHEMBL3784	Writer	0	0 / 1聽聽聽聽聽
13.csv	Histone acetyltransferase PCAF	KAT2B	Q92831	CHEMBL5500	Writer	0	0 / 1聽聽聽聽聽
13.csv	Retinoic acid receptor gamma	RARG	P13631	CHEMBL2003	Nuclear receptor	0	0 / 3聽聽聽聽聽
13.csv	Retinoic acid receptor beta	RARB	P10826	CHEMBL2008	Nuclear receptor	0	0 / 3聽聽聽聽聽
13.csv	Dual-specificity tyrosine-phosphorylation regulated kinase 1A	DYRK1A	Q13627	CHEMBL2292	Kinase	0	0 / 1聽聽聽聽聽
13.csv	Dual specificty protein kinase CLK1	CLK1	P49759	CHEMBL4224	Kinase	0	0 / 1聽聽聽聽聽
13.csv	Dual specificity tyrosine-phosphorylation-regulated kinase 1B	DYRK1B	Q9Y463	CHEMBL5543	Kinase	0	0 / 1聽聽聽聽聽
13.csv	Bifunctional protein NCOAT	OGA	O60502	CHEMBL5921	Enzyme	0	1 / 0聽聽聽聽聽
13.csv	Tyrosine-protein kinase FYN	FYN	P06241	CHEMBL1841	Kinase	0	0 / 1聽聽聽聽聽
13.csv	Tyrosine-protein kinase LCK	LCK	P06239	CHEMBL258	Kinase	0	0 / 2聽聽聽聽聽
13.csv	Cytochrome P450 19A1	CYP19A1	P11511	CHEMBL1978	Cytochrome P450	0	0 / 1聽聽聽聽聽
13.csv	C-terminal-binding protein 2	CTBP2	P56545	CHEMBL3797016	Unclassified protein	0	2 / 0聽聽聽聽聽
13.csv	Monoamine oxidase B	MAOB	P27338	CHEMBL2039	Oxidoreductase	0	0 / 21聽聽聽聽聽
13.csv	Dipeptidyl peptidase IV	DPP4	P27487	CHEMBL284	Protease	0	1 / 1聽聽聽聽聽
13.csv	Tubulin beta-1 chain	TUBB1	Q9H4B7	CHEMBL1915	Structural protein	0	0 / 1聽聽聽聽聽
13.csv	Acetylcholinesterase	ACHE	P22303	CHEMBL220	Hydrolase	0	0 / 3聽聽聽聽聽
13.csv	Aminopeptidase A	ENPEP	Q07075	CHEMBL3439	Protease	0	1 / 0聽聽聽聽聽
13.csv	Toll-like receptor 4 (by homology)	TLR4	O00206	CHEMBL5255	Toll-like and Il-1 receptors	0	1 / 0聽聽聽聽聽
13.csv	Aldose reductase	AKR1B1	P15121	CHEMBL1900	Enzyme	0	1 / 0聽聽聽聽聽
13.csv	Leucine aminopeptidase	LAP3	P28838	CHEMBL3965	Protease	0	1 / 0聽聽聽聽聽
13.csv	Fatty acid synthase	FASN	P49327	CHEMBL4158	Transferase	0	0 / 1聽聽聽聽聽
13.csv	D-amino-acid oxidase	DAO	P14920	CHEMBL5485	Enzyme	0	1 / 1聽聽聽聽聽
13.csv	Estrogen receptor alpha	ESR1	P03372	CHEMBL206	Nuclear receptor	0	0 / 2聽聽聽聽聽
13.csv	Lysine-specific demethylase 3A	KDM3A	Q9Y4C1	CHEMBL1938209	Eraser	0	1 / 0聽聽聽聽聽
13.csv	Lysine-specific demethylase 6B	KDM6B	O15054	CHEMBL1938211	Eraser	0	1 / 0聽聽聽聽聽
13.csv	Cytidine deaminase	CDA	P32320	CHEMBL4502	Enzyme	0	2 / 0聽聽聽聽聽
13.csv	Lysine-specific demethylase 4A	KDM4A	O75164	CHEMBL5896	Eraser	0	2 / 0聽聽聽聽聽
13.csv	Lysine-specific demethylase 4C	KDM4C	Q9H3R0	CHEMBL6175	Eraser	0	1 / 0聽聽聽聽聽
13.csv	Peptidyl-prolyl cis-trans isomerase NIMA-interacting 1	PIN1	Q13526	CHEMBL2288	Enzyme	0	2 / 0聽聽聽聽聽
13.csv	Monoamine oxidase A	MAOA	P21397	CHEMBL1951	Oxidoreductase	0	0 / 5聽聽聽聽聽
13.csv	Dopamine transporter	SLC6A3	Q01959	CHEMBL238	Electrochemical transporter	0	0 / 1聽聽聽聽聽
13.csv	AICAR transformylase	ATIC	P31939	CHEMBL2518	Enzyme	0	0 / 1聽聽聽聽聽
13.csv	Arachidonate 12-lipoxygenase	ALOX12	P18054	CHEMBL3687	Enzyme	0	0 / 1聽聽聽聽聽
13.csv	Heat shock protein HSP 90-alpha	HSP90AA1	P07900	CHEMBL3880	Other cytosolic protein	0	0 / 2聽聽聽聽聽
13.csv	Indoleamine 2,3-dioxygenase	IDO1	P14902	CHEMBL4685	Enzyme	0	0 / 3聽聽聽聽聽
13.csv	Protein-tyrosine phosphatase 1B	PTPN1	P18031	CHEMBL335	Phosphatase	0	4 / 5聽聽聽聽聽
13.csv	Alpha-2a adrenergic receptor	ADRA2A	P08913	CHEMBL1867	Family A G protein-coupled receptor	0	0 / 1聽聽聽聽聽
13.csv	Adrenergic receptor alpha-2	ADRA2C	P18825	CHEMBL1916	Family A G protein-coupled receptor	0	0 / 1聽聽聽聽聽
13.csv	Adrenergic receptor beta	ADRB2	P07550	CHEMBL210	Family A G protein-coupled receptor	0	0 / 1聽聽聽聽聽
13.csv	Dopamine D2 receptor	DRD2	P14416	CHEMBL217	Family A G protein-coupled receptor	0	0 / 1聽聽聽聽聽
13.csv	Alpha-1a adrenergic receptor	ADRA1A	P35348	CHEMBL229	Family A G protein-coupled receptor	0	0 / 2聽聽聽聽聽
13.csv	Alpha-2b adrenergic receptor (by homology)	ADRA2B	P18089	CHEMBL1942	Family A G protein-coupled receptor	0	0 / 1聽聽聽聽聽
13.csv	Beta-1 adrenergic receptor (by homology)	ADRB1	P08588	CHEMBL213	Family A G protein-coupled receptor	0	0 / 1聽聽聽聽聽
13.csv	Myeloperoxidase	MPO	P05164	CHEMBL2439	Enzyme	0	0 / 1聽聽聽聽聽
14.csv	Aldose reductase	AKR1B1	P15121	CHEMBL1900	Enzyme	1	28 / 38聽聽聽聽聽
14.csv	Carbonic anhydrase II	CA2	P00918	CHEMBL205	Lyase	1	21 / 14聽聽聽聽聽
14.csv	Carbonic anhydrase VII	CA7	P43166	CHEMBL2326	Lyase	1	6 / 18聽聽聽聽聽
14.csv	Estrogen receptor beta	ESR2	Q92731	CHEMBL242	Nuclear receptor	1	1 / 12聽聽聽聽聽
14.csv	Carbonic anhydrase I	CA1	P00915	CHEMBL261	Lyase	1	18 / 18聽聽聽聽聽
14.csv	Carbonic anhydrase III	CA3	P07451	CHEMBL2885	Lyase	1	4 / 4聽聽聽聽聽
14.csv	Carbonic anhydrase VI	CA6	P23280	CHEMBL3025	Lyase	1	7 / 15聽聽聽聽聽
14.csv	Carbonic anhydrase XII	CA12	O43570	CHEMBL3242	Lyase	1	11 / 14聽聽聽聽聽
14.csv	Carbonic anhydrase XIV	CA14	Q9ULX7	CHEMBL3510	Lyase	1	7 / 18聽聽聽聽聽
14.csv	Carbonic anhydrase IX	CA9	Q16790	CHEMBL3594	Lyase	1	10 / 19聽聽聽聽聽
14.csv	Carbonic anhydrase IV	CA4	P22748	CHEMBL3729	Lyase	1	2 / 7聽聽聽聽聽
14.csv	Carbonic anhydrase VB	CA5B	Q9Y2D0	CHEMBL3969	Lyase	1	5 / 14聽聽聽聽聽
14.csv	Carbonic anhydrase VA	CA5A	P35218	CHEMBL4789	Lyase	1	6 / 15聽聽聽聽聽
14.csv	Macrophage migration inhibitory factor	MIF	P14174	CHEMBL2085	Enzyme	0.25851	1 / 1聽聽聽聽聽
14.csv	Arachidonate 5-lipoxygenase	ALOX5	P09917	CHEMBL215	Oxidoreductase	0.21655	1 / 21聽聽聽聽聽
14.csv	Matrix metalloproteinase 9	MMP9	P14780	CHEMBL321	Protease	0.21655	2 / 19聽聽聽聽聽
14.csv	Matrix metalloproteinase 1	MMP1	P03956	CHEMBL332	Protease	0.21655	2 / 18聽聽聽聽聽
14.csv	Matrix metalloproteinase 2	MMP2	P08253	CHEMBL333	Protease	0.21655	2 / 20聽聽聽聽聽
14.csv	Protein-tyrosine phosphatase 1B	PTPN1	P18031	CHEMBL335	Phosphatase	0.21655	13 / 2聽聽聽聽聽
14.csv	Aldo-keto reductase family 1 member B10	AKR1B10	O60218	CHEMBL5983	Enzyme	0.158398	0 / 18聽聽聽聽聽
14.csv	Toll-like receptor 4 (by homology)	TLR4	O00206	CHEMBL5255	Toll-like and Il-1 receptors	0.133391	0 / 22聽聽聽聽聽
14.csv	Carbonic anhydrase XIII (by homology)	CA13	Q8N1Q1	CHEMBL3912	Lyase	0.133391	2 / 11聽聽聽聽聽
14.csv	Lysine-specific demethylase 4D-like	KDM4E	B2RXH2	CHEMBL1293226	Eraser	0.133391	3 / 0聽聽聽聽聽
14.csv	Lysine-specific demethylase 4A	KDM4A	O75164	CHEMBL5896	Eraser	0.133391	4 / 0聽聽聽聽聽
14.csv	Lysine-specific demethylase 3A	KDM3A	Q9Y4C1	CHEMBL1938209	Eraser	0.133391	2 / 0聽聽聽聽聽
14.csv	Lysine-specific demethylase 6B	KDM6B	O15054	CHEMBL1938211	Eraser	0.133391	2 / 0聽聽聽聽聽
14.csv	Alpha-ketoglutarate-dependent dioxygenase FTO	FTO	Q9C0B1	CHEMBL2331065	Oxidoreductase	0.133391	2 / 0聽聽聽聽聽
14.csv	Lysine-specific demethylase 4C	KDM4C	Q9H3R0	CHEMBL6175	Eraser	0.133391	3 / 0聽聽聽聽聽
14.csv	Coagulation factor VII/tissue factor	F3	P13726	CHEMBL4081	Surface antigen	0.125076	0 / 10聽聽聽聽聽
14.csv	11-beta-hydroxysteroid dehydrogenase 1	HSD11B1	P28845	CHEMBL4235	Enzyme	0.125076	0 / 6聽聽聽聽聽
14.csv	Hydroxycarboxylic acid receptor 2	HCAR2	Q8TDS4	CHEMBL3785	Family A G protein-coupled receptor	0.125076	10 / 1聽聽聽聽聽
14.csv	Thiopurine S-methyltransferase	TPMT	P51580	CHEMBL2500	Enzyme	0.125076	4 / 0聽聽聽聽聽
14.csv	D-amino-acid oxidase	DAO	P14920	CHEMBL5485	Enzyme	0.116739	5 / 0聽聽聽聽聽
14.csv	Transient receptor potential cation channel subfamily A member 1	TRPA1	O75762	CHEMBL6007	Voltage-gated ion channel	0.116739	0 / 1聽聽聽聽聽
14.csv	Low affinity neurotrophin receptor p75NTR	NGFR	P08138	CHEMBL4762	Membrane receptor	0.116739	1 / 0聽聽聽聽聽
14.csv	Estrogen receptor alpha	ESR1	P03372	CHEMBL206	Nuclear receptor	0.116739	0 / 25聽聽聽聽聽
14.csv	Progesterone receptor	PGR	P06401	CHEMBL208	Nuclear receptor	0.116739	0 / 2聽聽聽聽聽
14.csv	Tyrosine-protein kinase FYN	FYN	P06241	CHEMBL1841	Kinase	0	2 / 2聽聽聽聽聽
14.csv	Tyrosine-protein kinase LCK	LCK	P06239	CHEMBL258	Kinase	0	2 / 6聽聽聽聽聽
14.csv	Kynurenine 3-monooxygenase (by homology)	KMO	O15229	CHEMBL2145	Oxidoreductase	0	10 / 0聽聽聽聽聽
14.csv	Glycogen synthase kinase-3 beta	GSK3B	P49841	CHEMBL262	Kinase	0	0 / 8聽聽聽聽聽
14.csv	Toll-like receptor (TLR7/TLR9)	TLR9	Q9NR96	CHEMBL5804	Toll-like and Il-1 receptors	0	0 / 4聽聽聽聽聽
14.csv	Receptor protein-tyrosine kinase erbB-2	ERBB2	P04626	CHEMBL1824	Kinase	0	0 / 2聽聽聽聽聽
14.csv	Norepinephrine transporter	SLC6A2	P23975	CHEMBL222	Electrochemical transporter	0	0 / 3聽聽聽聽聽
14.csv	MAP kinase ERK2	MAPK1	P28482	CHEMBL4040	Kinase	0	0 / 1聽聽聽聽聽
14.csv	Aldo-keto reductase family 1 member C4	AKR1C4	P17516	CHEMBL4999	Enzyme	0	0 / 1聽聽聽聽聽
14.csv	Carboxypeptidase A1	CPA1	P15085	CHEMBL2088	Protease	0	9 / 0聽聽聽聽聽
14.csv	Lysine-specific demethylase 2A	KDM2A	Q9Y2K7	CHEMBL1938210	Eraser	0	2 / 0聽聽聽聽聽
14.csv	Cyclooxygenase-1	PTGS1	P23219	CHEMBL221	Oxidoreductase	0	1 / 11聽聽聽聽聽
14.csv	Quinone reductase 2	NQO2	P16083	CHEMBL3959	Enzyme	0	0 / 13聽聽聽聽聽
14.csv	Monocarboxylate transporter 1 (by homology)	SLC16A1	P53985	CHEMBL4360	Electrochemical transporter	0	2 / 16聽聽聽聽聽
14.csv	C-terminal-binding protein 2	CTBP2	P56545	CHEMBL3797016	Unclassified protein	0	13 / 0聽聽聽聽聽
14.csv	Epidermal growth factor receptor erbB1	EGFR	P00533	CHEMBL203	Kinase	0	1 / 15聽聽聽聽聽
14.csv	Dual-specificity tyrosine-phosphorylation regulated kinase 1A	DYRK1A	Q13627	CHEMBL2292	Kinase	0	0 / 6聽聽聽聽聽
14.csv	Beta amyloid A4 protein	APP	P05067	CHEMBL2487	Membrane receptor	0	0 / 26聽聽聽聽聽
14.csv	PI3-kinase p110-beta subunit	PIK3CB	P42338	CHEMBL3145	Enzyme	0	0 / 1聽聽聽聽聽
14.csv	Cytochrome P450 1A2	CYP1A2	P05177	CHEMBL3356	Cytochrome P450	0	0 / 4聽聽聽聽聽
14.csv	Cytochrome P450 2C9	CYP2C9	P11712	CHEMBL3397	Cytochrome P450	0	0 / 2聽聽聽聽聽
14.csv	Cytochrome P450 3A4	CYP3A4	P08684	CHEMBL340	Cytochrome P450	0	0 / 2聽聽聽聽聽
14.csv	Cytochrome P450 2C19	CYP2C19	P33261	CHEMBL3622	Cytochrome P450	0	0 / 2聽聽聽聽聽
14.csv	PI3-kinase p110-alpha subunit	PIK3CA	P42336	CHEMBL4005	Enzyme	0	0 / 1聽聽聽聽聽
14.csv	Dual specificity tyrosine-phosphorylation-regulated kinase 1B	DYRK1B	Q9Y463	CHEMBL5543	Kinase	0	0 / 5聽聽聽聽聽
14.csv	Nuclear factor NF-kappa-B p65 subunit	RELA	Q04206	CHEMBL5533	Transcription factor	0	0 / 11聽聽聽聽聽
14.csv	Cyclooxygenase-2	PTGS2	P35354	CHEMBL230	Oxidoreductase	0	3 / 11聽聽聽聽聽
14.csv	Uracil nucleotide/cysteinyl leukotriene receptor	GPR17	Q13304	CHEMBL1075162	Family A G protein-coupled receptor	0	2 / 0聽聽聽聽聽
14.csv	Fructose-1,6-bisphosphatase	FBP1	P09467	CHEMBL3975	Enzyme	0	13 / 0聽聽聽聽聽
14.csv	Leukocyte elastase	ELANE	P08246	CHEMBL248	Protease	0	0 / 2聽聽聽聽聽
14.csv	Tyrosine-protein kinase SYK	SYK	P43405	CHEMBL2599	Kinase	0	0 / 1聽聽聽聽聽
14.csv	Steroid 5-alpha-reductase 2	SRD5A2	P31213	CHEMBL1856	Oxidoreductase	0	0 / 1聽聽聽聽聽
14.csv	G protein-coupled receptor 44	PTGDR2	Q9Y5Y4	CHEMBL5071	Family A G protein-coupled receptor	0	1 / 0聽聽聽聽聽
14.csv	Calpain 2	CAPN2	P17655	CHEMBL2382	Protease	0	0 / 1聽聽聽聽聽
14.csv	Calpain 1	CAPN1	P07384	CHEMBL3891	Protease	0	0 / 1聽聽聽聽聽
14.csv	Indoleamine 2,3-dioxygenase	IDO1	P14902	CHEMBL4685	Enzyme	0	0 / 1聽聽聽聽聽
14.csv	Tyrosine-protein kinase SRC	SRC	P12931	CHEMBL267	Kinase	0	0 / 2聽聽聽聽聽
14.csv	Serine/threonine-protein kinase EEF2K	EEF2K	O00418	CHEMBL5026	Kinase	0	0 / 2聽聽聽聽聽
14.csv	Protein kinase C theta	PRKCQ	Q04759	CHEMBL3920	Kinase	0	0 / 1聽聽聽聽聽
14.csv	Prostanoid EP4 receptor	PTGER4	P35408	CHEMBL1836	Family A G protein-coupled receptor	0	0 / 6聽聽聽聽聽
14.csv	Prostanoid EP2 receptor	PTGER2	P43116	CHEMBL1881	Family A G protein-coupled receptor	0	0 / 7聽聽聽聽聽
14.csv	Prostanoid EP3 receptor	PTGER3	P43115	CHEMBL3710	Family A G protein-coupled receptor	0	0 / 8聽聽聽聽聽
14.csv	Nuclear factor erythroid 2-related factor 2	NFE2L2	Q16236	CHEMBL1075094	Unclassified protein	0	0 / 3聽聽聽聽聽
14.csv	Signal transducer and activator of transcription 3	STAT3	P40763	CHEMBL4026	Transcription factor	0	0 / 1聽聽聽聽聽
14.csv	Protein-arginine N-methyltransferase 1	PRMT1	Q99873	CHEMBL5524	Writer	0	0 / 1聽聽聽聽聽
14.csv	Interferon-induced, double-stranded RNA-activated protein kinase	EIF2AK2	P19525	CHEMBL5785	Kinase	0	0 / 1聽聽聽聽聽
14.csv	Glutamate carboxypeptidase II	FOLH1	Q04609	CHEMBL1892	Protease	0	9 / 0聽聽聽聽聽
14.csv	Matrix metalloproteinase 8	MMP8	P22894	CHEMBL4588	Protease	0	1 / 0聽聽聽聽聽
14.csv	Monoamine oxidase B	MAOB	P27338	CHEMBL2039	Oxidoreductase	0	2 / 22聽聽聽聽聽
14.csv	Hepatocyte growth factor receptor	MET	P08581	CHEMBL3717	Kinase	0	0 / 18聽聽聽聽聽
14.csv	Aldehyde dehydrogenase	ALDH2	P05091	CHEMBL1935	Oxidoreductase	0	0 / 1聽聽聽聽聽
14.csv	Alkaline phosphatase, tissue-nonspecific isozyme	ALPL	P05186	CHEMBL5979	Enzyme	0	6 / 0聽聽聽聽聽
14.csv	Endothelin-converting enzyme 1	ECE1	P42892	CHEMBL4791	Protease	0	2 / 0聽聽聽聽聽
14.csv	Neprilysin	MME	P08473	CHEMBL1944	Protease	0	6 / 0聽聽聽聽聽
14.csv	Solute carrier family 13 member 5	SLC13A5	Q86YT5	CHEMBL3769293	Electrochemical transporter	0	9 / 0聽聽聽聽聽
14.csv	Estradiol 17-beta-dehydrogenase 2	HSD17B2	P37059	CHEMBL2789	Enzyme	0	0 / 1聽聽聽聽聽
14.csv	Estradiol 17-beta-dehydrogenase 1	HSD17B1	P14061	CHEMBL3181	Enzyme	0	0 / 1聽聽聽聽聽
14.csv	Dual specificty protein kinase CLK1	CLK1	P49759	CHEMBL4224	Kinase	0	0 / 2聽聽聽聽聽
14.csv	Leucine aminopeptidase	LAP3	P28838	CHEMBL3965	Protease	0	1 / 0聽聽聽聽聽
14.csv	Dipeptidyl peptidase IV	DPP4	P27487	CHEMBL284	Protease	0	2 / 0聽聽聽聽聽
14.csv	T-cell protein-tyrosine phosphatase	PTPN2	P17706	CHEMBL3807	Phosphatase	0	2 / 0聽聽聽聽聽
14.csv	Cyclin-dependent kinase 4/cyclin D1	CCND1 CDK4	P24385 P11802	CHEMBL1907601	Kinase	0	0 / 1聽聽聽聽聽
14.csv	CDC7/DBF4 (Cell division cycle 7-related protein kinase/Activator of S phase kinase)	DBF4 CDC7	Q9UBU7 O00311	CHEMBL2111377	Kinase	0	1 / 0聽聽聽聽聽
15.csv	Aldose reductase	AKR1B1	P15121	CHEMBL1900	Enzyme	1	28 / 38聽聽聽聽聽
15.csv	Carbonic anhydrase II	CA2	P00918	CHEMBL205	Lyase	1	21 / 14聽聽聽聽聽
15.csv	Carbonic anhydrase VII	CA7	P43166	CHEMBL2326	Lyase	1	6 / 18聽聽聽聽聽
15.csv	Estrogen receptor beta	ESR2	Q92731	CHEMBL242	Nuclear receptor	1	1 / 12聽聽聽聽聽
15.csv	Carbonic anhydrase I	CA1	P00915	CHEMBL261	Lyase	1	18 / 18聽聽聽聽聽
15.csv	Carbonic anhydrase III	CA3	P07451	CHEMBL2885	Lyase	1	4 / 4聽聽聽聽聽
15.csv	Carbonic anhydrase VI	CA6	P23280	CHEMBL3025	Lyase	1	7 / 15聽聽聽聽聽
15.csv	Carbonic anhydrase XII	CA12	O43570	CHEMBL3242	Lyase	1	11 / 14聽聽聽聽聽
15.csv	Carbonic anhydrase XIV	CA14	Q9ULX7	CHEMBL3510	Lyase	1	7 / 18聽聽聽聽聽
15.csv	Carbonic anhydrase IX	CA9	Q16790	CHEMBL3594	Lyase	1	10 / 19聽聽聽聽聽
15.csv	Carbonic anhydrase IV	CA4	P22748	CHEMBL3729	Lyase	1	2 / 7聽聽聽聽聽
15.csv	Carbonic anhydrase VB	CA5B	Q9Y2D0	CHEMBL3969	Lyase	1	5 / 14聽聽聽聽聽
15.csv	Carbonic anhydrase VA	CA5A	P35218	CHEMBL4789	Lyase	1	6 / 15聽聽聽聽聽
15.csv	Macrophage migration inhibitory factor	MIF	P14174	CHEMBL2085	Enzyme	0.25851	1 / 1聽聽聽聽聽
15.csv	Arachidonate 5-lipoxygenase	ALOX5	P09917	CHEMBL215	Oxidoreductase	0.21655	1 / 21聽聽聽聽聽
15.csv	Matrix metalloproteinase 9	MMP9	P14780	CHEMBL321	Protease	0.21655	2 / 19聽聽聽聽聽
15.csv	Matrix metalloproteinase 1	MMP1	P03956	CHEMBL332	Protease	0.21655	2 / 18聽聽聽聽聽
15.csv	Matrix metalloproteinase 2	MMP2	P08253	CHEMBL333	Protease	0.21655	2 / 20聽聽聽聽聽
15.csv	Protein-tyrosine phosphatase 1B	PTPN1	P18031	CHEMBL335	Phosphatase	0.21655	13 / 2聽聽聽聽聽
15.csv	Aldo-keto reductase family 1 member B10	AKR1B10	O60218	CHEMBL5983	Enzyme	0.158398	0 / 18聽聽聽聽聽
15.csv	Toll-like receptor 4 (by homology)	TLR4	O00206	CHEMBL5255	Toll-like and Il-1 receptors	0.133391	0 / 22聽聽聽聽聽
15.csv	Carbonic anhydrase XIII (by homology)	CA13	Q8N1Q1	CHEMBL3912	Lyase	0.133391	2 / 11聽聽聽聽聽
15.csv	Lysine-specific demethylase 4D-like	KDM4E	B2RXH2	CHEMBL1293226	Eraser	0.133391	3 / 0聽聽聽聽聽
15.csv	Lysine-specific demethylase 4A	KDM4A	O75164	CHEMBL5896	Eraser	0.133391	4 / 0聽聽聽聽聽
15.csv	Lysine-specific demethylase 3A	KDM3A	Q9Y4C1	CHEMBL1938209	Eraser	0.133391	2 / 0聽聽聽聽聽
15.csv	Lysine-specific demethylase 6B	KDM6B	O15054	CHEMBL1938211	Eraser	0.133391	2 / 0聽聽聽聽聽
15.csv	Alpha-ketoglutarate-dependent dioxygenase FTO	FTO	Q9C0B1	CHEMBL2331065	Oxidoreductase	0.133391	2 / 0聽聽聽聽聽
15.csv	Lysine-specific demethylase 4C	KDM4C	Q9H3R0	CHEMBL6175	Eraser	0.133391	3 / 0聽聽聽聽聽
15.csv	Coagulation factor VII/tissue factor	F3	P13726	CHEMBL4081	Surface antigen	0.125076	0 / 10聽聽聽聽聽
15.csv	11-beta-hydroxysteroid dehydrogenase 1	HSD11B1	P28845	CHEMBL4235	Enzyme	0.125076	0 / 6聽聽聽聽聽
15.csv	Hydroxycarboxylic acid receptor 2	HCAR2	Q8TDS4	CHEMBL3785	Family A G protein-coupled receptor	0.125076	10 / 1聽聽聽聽聽
15.csv	Thiopurine S-methyltransferase	TPMT	P51580	CHEMBL2500	Enzyme	0.125076	4 / 0聽聽聽聽聽
15.csv	D-amino-acid oxidase	DAO	P14920	CHEMBL5485	Enzyme	0.116739	5 / 0聽聽聽聽聽
15.csv	Transient receptor potential cation channel subfamily A member 1	TRPA1	O75762	CHEMBL6007	Voltage-gated ion channel	0.116739	0 / 1聽聽聽聽聽
15.csv	Low affinity neurotrophin receptor p75NTR	NGFR	P08138	CHEMBL4762	Membrane receptor	0.116739	1 / 0聽聽聽聽聽
15.csv	Estrogen receptor alpha	ESR1	P03372	CHEMBL206	Nuclear receptor	0.116739	0 / 25聽聽聽聽聽
15.csv	Progesterone receptor	PGR	P06401	CHEMBL208	Nuclear receptor	0.116739	0 / 2聽聽聽聽聽
15.csv	Tyrosine-protein kinase FYN	FYN	P06241	CHEMBL1841	Kinase	0	2 / 2聽聽聽聽聽
15.csv	Tyrosine-protein kinase LCK	LCK	P06239	CHEMBL258	Kinase	0	2 / 6聽聽聽聽聽
15.csv	Kynurenine 3-monooxygenase (by homology)	KMO	O15229	CHEMBL2145	Oxidoreductase	0	10 / 0聽聽聽聽聽
15.csv	Glycogen synthase kinase-3 beta	GSK3B	P49841	CHEMBL262	Kinase	0	0 / 8聽聽聽聽聽
15.csv	Toll-like receptor (TLR7/TLR9)	TLR9	Q9NR96	CHEMBL5804	Toll-like and Il-1 receptors	0	0 / 4聽聽聽聽聽
15.csv	Receptor protein-tyrosine kinase erbB-2	ERBB2	P04626	CHEMBL1824	Kinase	0	0 / 2聽聽聽聽聽
15.csv	Norepinephrine transporter	SLC6A2	P23975	CHEMBL222	Electrochemical transporter	0	0 / 3聽聽聽聽聽
15.csv	MAP kinase ERK2	MAPK1	P28482	CHEMBL4040	Kinase	0	0 / 1聽聽聽聽聽
15.csv	Aldo-keto reductase family 1 member C4	AKR1C4	P17516	CHEMBL4999	Enzyme	0	0 / 1聽聽聽聽聽
15.csv	Carboxypeptidase A1	CPA1	P15085	CHEMBL2088	Protease	0	9 / 0聽聽聽聽聽
15.csv	Lysine-specific demethylase 2A	KDM2A	Q9Y2K7	CHEMBL1938210	Eraser	0	2 / 0聽聽聽聽聽
15.csv	Cyclooxygenase-1	PTGS1	P23219	CHEMBL221	Oxidoreductase	0	1 / 11聽聽聽聽聽
15.csv	Quinone reductase 2	NQO2	P16083	CHEMBL3959	Enzyme	0	0 / 13聽聽聽聽聽
15.csv	Monocarboxylate transporter 1 (by homology)	SLC16A1	P53985	CHEMBL4360	Electrochemical transporter	0	2 / 16聽聽聽聽聽
15.csv	C-terminal-binding protein 2	CTBP2	P56545	CHEMBL3797016	Unclassified protein	0	13 / 0聽聽聽聽聽
15.csv	Epidermal growth factor receptor erbB1	EGFR	P00533	CHEMBL203	Kinase	0	1 / 15聽聽聽聽聽
15.csv	Dual-specificity tyrosine-phosphorylation regulated kinase 1A	DYRK1A	Q13627	CHEMBL2292	Kinase	0	0 / 6聽聽聽聽聽
15.csv	Beta amyloid A4 protein	APP	P05067	CHEMBL2487	Membrane receptor	0	0 / 26聽聽聽聽聽
15.csv	PI3-kinase p110-beta subunit	PIK3CB	P42338	CHEMBL3145	Enzyme	0	0 / 1聽聽聽聽聽
15.csv	Cytochrome P450 1A2	CYP1A2	P05177	CHEMBL3356	Cytochrome P450	0	0 / 4聽聽聽聽聽
15.csv	Cytochrome P450 2C9	CYP2C9	P11712	CHEMBL3397	Cytochrome P450	0	0 / 2聽聽聽聽聽
15.csv	Cytochrome P450 3A4	CYP3A4	P08684	CHEMBL340	Cytochrome P450	0	0 / 2聽聽聽聽聽
15.csv	Cytochrome P450 2C19	CYP2C19	P33261	CHEMBL3622	Cytochrome P450	0	0 / 2聽聽聽聽聽
15.csv	PI3-kinase p110-alpha subunit	PIK3CA	P42336	CHEMBL4005	Enzyme	0	0 / 1聽聽聽聽聽
15.csv	Dual specificity tyrosine-phosphorylation-regulated kinase 1B	DYRK1B	Q9Y463	CHEMBL5543	Kinase	0	0 / 5聽聽聽聽聽
15.csv	Nuclear factor NF-kappa-B p65 subunit	RELA	Q04206	CHEMBL5533	Transcription factor	0	0 / 11聽聽聽聽聽
15.csv	Cyclooxygenase-2	PTGS2	P35354	CHEMBL230	Oxidoreductase	0	3 / 11聽聽聽聽聽
15.csv	Uracil nucleotide/cysteinyl leukotriene receptor	GPR17	Q13304	CHEMBL1075162	Family A G protein-coupled receptor	0	2 / 0聽聽聽聽聽
15.csv	Fructose-1,6-bisphosphatase	FBP1	P09467	CHEMBL3975	Enzyme	0	13 / 0聽聽聽聽聽
15.csv	Leukocyte elastase	ELANE	P08246	CHEMBL248	Protease	0	0 / 2聽聽聽聽聽
15.csv	Tyrosine-protein kinase SYK	SYK	P43405	CHEMBL2599	Kinase	0	0 / 1聽聽聽聽聽
15.csv	Steroid 5-alpha-reductase 2	SRD5A2	P31213	CHEMBL1856	Oxidoreductase	0	0 / 1聽聽聽聽聽
15.csv	G protein-coupled receptor 44	PTGDR2	Q9Y5Y4	CHEMBL5071	Family A G protein-coupled receptor	0	1 / 0聽聽聽聽聽
15.csv	Calpain 2	CAPN2	P17655	CHEMBL2382	Protease	0	0 / 1聽聽聽聽聽
15.csv	Calpain 1	CAPN1	P07384	CHEMBL3891	Protease	0	0 / 1聽聽聽聽聽
15.csv	Indoleamine 2,3-dioxygenase	IDO1	P14902	CHEMBL4685	Enzyme	0	0 / 1聽聽聽聽聽
15.csv	Tyrosine-protein kinase SRC	SRC	P12931	CHEMBL267	Kinase	0	0 / 2聽聽聽聽聽
15.csv	Serine/threonine-protein kinase EEF2K	EEF2K	O00418	CHEMBL5026	Kinase	0	0 / 2聽聽聽聽聽
15.csv	Protein kinase C theta	PRKCQ	Q04759	CHEMBL3920	Kinase	0	0 / 1聽聽聽聽聽
15.csv	Prostanoid EP4 receptor	PTGER4	P35408	CHEMBL1836	Family A G protein-coupled receptor	0	0 / 6聽聽聽聽聽
15.csv	Prostanoid EP2 receptor	PTGER2	P43116	CHEMBL1881	Family A G protein-coupled receptor	0	0 / 7聽聽聽聽聽
15.csv	Prostanoid EP3 receptor	PTGER3	P43115	CHEMBL3710	Family A G protein-coupled receptor	0	0 / 8聽聽聽聽聽
15.csv	Nuclear factor erythroid 2-related factor 2	NFE2L2	Q16236	CHEMBL1075094	Unclassified protein	0	0 / 3聽聽聽聽聽
15.csv	Signal transducer and activator of transcription 3	STAT3	P40763	CHEMBL4026	Transcription factor	0	0 / 1聽聽聽聽聽
15.csv	Protein-arginine N-methyltransferase 1	PRMT1	Q99873	CHEMBL5524	Writer	0	0 / 1聽聽聽聽聽
15.csv	Interferon-induced, double-stranded RNA-activated protein kinase	EIF2AK2	P19525	CHEMBL5785	Kinase	0	0 / 1聽聽聽聽聽
15.csv	Glutamate carboxypeptidase II	FOLH1	Q04609	CHEMBL1892	Protease	0	9 / 0聽聽聽聽聽
15.csv	Matrix metalloproteinase 8	MMP8	P22894	CHEMBL4588	Protease	0	1 / 0聽聽聽聽聽
15.csv	Monoamine oxidase B	MAOB	P27338	CHEMBL2039	Oxidoreductase	0	2 / 22聽聽聽聽聽
15.csv	Hepatocyte growth factor receptor	MET	P08581	CHEMBL3717	Kinase	0	0 / 18聽聽聽聽聽
15.csv	Aldehyde dehydrogenase	ALDH2	P05091	CHEMBL1935	Oxidoreductase	0	0 / 1聽聽聽聽聽
15.csv	Alkaline phosphatase, tissue-nonspecific isozyme	ALPL	P05186	CHEMBL5979	Enzyme	0	6 / 0聽聽聽聽聽
15.csv	Endothelin-converting enzyme 1	ECE1	P42892	CHEMBL4791	Protease	0	2 / 0聽聽聽聽聽
15.csv	Neprilysin	MME	P08473	CHEMBL1944	Protease	0	6 / 0聽聽聽聽聽
15.csv	Solute carrier family 13 member 5	SLC13A5	Q86YT5	CHEMBL3769293	Electrochemical transporter	0	9 / 0聽聽聽聽聽
15.csv	Estradiol 17-beta-dehydrogenase 2	HSD17B2	P37059	CHEMBL2789	Enzyme	0	0 / 1聽聽聽聽聽
15.csv	Estradiol 17-beta-dehydrogenase 1	HSD17B1	P14061	CHEMBL3181	Enzyme	0	0 / 1聽聽聽聽聽
15.csv	Dual specificty protein kinase CLK1	CLK1	P49759	CHEMBL4224	Kinase	0	0 / 2聽聽聽聽聽
15.csv	Leucine aminopeptidase	LAP3	P28838	CHEMBL3965	Protease	0	1 / 0聽聽聽聽聽
15.csv	Dipeptidyl peptidase IV	DPP4	P27487	CHEMBL284	Protease	0	2 / 0聽聽聽聽聽
15.csv	T-cell protein-tyrosine phosphatase	PTPN2	P17706	CHEMBL3807	Phosphatase	0	2 / 0聽聽聽聽聽
15.csv	Cyclin-dependent kinase 4/cyclin D1	CCND1 CDK4	P24385 P11802	CHEMBL1907601	Kinase	0	0 / 1聽聽聽聽聽
15.csv	CDC7/DBF4 (Cell division cycle 7-related protein kinase/Activator of S phase kinase)	DBF4 CDC7	Q9UBU7 O00311	CHEMBL2111377	Kinase	0	1 / 0聽聽聽聽聽
16.csv	Carbonic anhydrase II	CA2	P00918	CHEMBL205	Lyase	0.141787	0 / 52聽聽聽聽聽
16.csv	Carbonic anhydrase I	CA1	P00915	CHEMBL261	Lyase	0.141787	0 / 51聽聽聽聽聽
16.csv	D-amino-acid oxidase	DAO	P14920	CHEMBL5485	Enzyme	0.141787	3 / 1聽聽聽聽聽
16.csv	Steroid 5-alpha-reductase 2	SRD5A2	P31213	CHEMBL1856	Oxidoreductase	0.125076	0 / 22聽聽聽聽聽
16.csv	Carbonic anhydrase VII	CA7	P43166	CHEMBL2326	Lyase	0.125076	0 / 28聽聽聽聽聽
16.csv	Carbonic anhydrase III	CA3	P07451	CHEMBL2885	Lyase	0.125076	0 / 4聽聽聽聽聽
16.csv	Carbonic anhydrase VI	CA6	P23280	CHEMBL3025	Lyase	0.125076	0 / 7聽聽聽聽聽
16.csv	Carbonic anhydrase XII	CA12	O43570	CHEMBL3242	Lyase	0.125076	0 / 35聽聽聽聽聽
16.csv	Carbonic anhydrase XIV	CA14	Q9ULX7	CHEMBL3510	Lyase	0.125076	0 / 29聽聽聽聽聽
16.csv	Carbonic anhydrase IX	CA9	Q16790	CHEMBL3594	Lyase	0.125076	0 / 33聽聽聽聽聽
16.csv	Carbonic anhydrase IV	CA4	P22748	CHEMBL3729	Lyase	0.125076	0 / 5聽聽聽聽聽
16.csv	Carbonic anhydrase XIII (by homology)	CA13	Q8N1Q1	CHEMBL3912	Lyase	0.125076	0 / 3聽聽聽聽聽
16.csv	Carbonic anhydrase VB	CA5B	Q9Y2D0	CHEMBL3969	Lyase	0.125076	0 / 4聽聽聽聽聽
16.csv	Carbonic anhydrase VA	CA5A	P35218	CHEMBL4789	Lyase	0.125076	0 / 5聽聽聽聽聽
16.csv	Fatty acid binding protein adipocyte	FABP4	P15090	CHEMBL2083	Fatty acid binding protein family	0.116739	0 / 1聽聽聽聽聽
16.csv	Fatty acid binding protein muscle	FABP3	P05413	CHEMBL3344	Fatty acid binding protein family	0.116739	0 / 1聽聽聽聽聽
16.csv	Thymidylate synthase	TYMS	P04818	CHEMBL1952	Transferase	0	0 / 4聽聽聽聽聽
16.csv	Serine/threonine-protein kinase/endoribonuclease IRE1	ERN1	O75460	CHEMBL1163101	Enzyme	0	0 / 10聽聽聽聽聽
16.csv	Group IID secretory phospholipase A2	PLA2G2D	Q9UNK4	CHEMBL4281	Enzyme	0	0 / 1聽聽聽聽聽
16.csv	L-lactate dehydrogenase A chain	LDHA	P00338	CHEMBL4835	Enzyme	0	0 / 7聽聽聽聽聽
16.csv	L-lactate dehydrogenase B chain	LDHB	P07195	CHEMBL4940	Enzyme	0	0 / 7聽聽聽聽聽
16.csv	Glutamate carboxypeptidase II	FOLH1	Q04609	CHEMBL1892	Protease	0	0 / 3聽聽聽聽聽
16.csv	Acyl coenzyme A:cholesterol acyltransferase	CES1	P23141	CHEMBL2265	Enzyme	0	0 / 6聽聽聽聽聽
16.csv	Carboxylesterase 2	CES2	O00748	CHEMBL3180	Enzyme	0	0 / 6聽聽聽聽聽
16.csv	Alpha-(1,3)-fucosyltransferase 7	FUT7	Q11130	CHEMBL3596077	Transferase	0	0 / 2聽聽聽聽聽
16.csv	Retinoic acid receptor gamma	RARG	P13631	CHEMBL2003	Nuclear receptor	0	0 / 6聽聽聽聽聽
16.csv	Retinoic acid receptor beta	RARB	P10826	CHEMBL2008	Nuclear receptor	0	0 / 8聽聽聽聽聽
16.csv	Hypoxia-inducible factor prolyl 4-hydroxylase	P4HTM	Q9NXG6	CHEMBL3047	Enzyme	0	3 / 0聽聽聽聽聽
16.csv	Estrogen receptor beta	ESR2	Q92731	CHEMBL242	Nuclear receptor	0	0 / 2聽聽聽聽聽
16.csv	Thiopurine S-methyltransferase	TPMT	P51580	CHEMBL2500	Enzyme	0	0 / 1聽聽聽聽聽
16.csv	Prolyl 4-hydroxylase subunit alpha-1	P4HA1	P13674	CHEMBL1250350	Enzyme	0	1 / 0聽聽聽聽聽
16.csv	Aldo-keto-reductase family 1 member C3	AKR1C3	P42330	CHEMBL4681	Enzyme	0	0 / 23聽聽聽聽聽
16.csv	Aldo-keto reductase family 1 member C2	AKR1C2	P52895	CHEMBL5847	Enzyme	0	0 / 7聽聽聽聽聽
16.csv	Indoleamine 2,3-dioxygenase	IDO1	P14902	CHEMBL4685	Enzyme	0	0 / 3聽聽聽聽聽
16.csv	Solute carrier family 22 member 6 (by homology)	SLC22A6	Q4U2R8	CHEMBL1641347	Electrochemical transporter	0	1 / 0聽聽聽聽聽
16.csv	WD repeat-containing protein 5	WDR5	P61964	CHEMBL1075317	Unclassified protein	0	0 / 1聽聽聽聽聽
16.csv	Cystine/glutamate transporter	SLC7A11	Q9UPY5	CHEMBL1075149	Electrochemical transporter	0	0 / 1聽聽聽聽聽
16.csv	Retinoic acid receptor alpha	RARA	P10276	CHEMBL2055	Nuclear receptor	0	0 / 3聽聽聽聽聽
16.csv	Serum albumin	ALB	P02768	CHEMBL3253	Secreted protein	0	0 / 1聽聽聽聽聽
16.csv	Aminopeptidase N	ANPEP	P15144	CHEMBL1907	Protease	0	0 / 2聽聽聽聽聽
16.csv	Poly [ADP-ribose] polymerase-1	PARP1	P09874	CHEMBL3105	Enzyme	0	0 / 1聽聽聽聽聽
16.csv	Aminopeptidase A	ENPEP	Q07075	CHEMBL3439	Protease	0	0 / 2聽聽聽聽聽
16.csv	Toll-like receptor 4 (by homology)	TLR4	O00206	CHEMBL5255	Toll-like and Il-1 receptors	0	2 / 0聽聽聽聽聽
16.csv	Tyrosine-protein kinase FYN	FYN	P06241	CHEMBL1841	Kinase	0	1 / 0聽聽聽聽聽
16.csv	Tyrosine-protein kinase LCK	LCK	P06239	CHEMBL258	Kinase	0	1 / 0聽聽聽聽聽
16.csv	Serotonin transporter	SLC6A4	P31645	CHEMBL228	Electrochemical transporter	0	0 / 1聽聽聽聽聽
16.csv	Dopamine transporter	SLC6A3	Q01959	CHEMBL238	Electrochemical transporter	0	0 / 2聽聽聽聽聽
16.csv	Alpha-L-fucosidase I	FUCA1	P04066	CHEMBL4176	Enzyme	0	1 / 0聽聽聽聽聽
16.csv	Lysine-specific demethylase 4D-like	KDM4E	B2RXH2	CHEMBL1293226	Eraser	0	1 / 0聽聽聽聽聽
16.csv	Lysine-specific demethylase 3A	KDM3A	Q9Y4C1	CHEMBL1938209	Eraser	0	1 / 0聽聽聽聽聽
16.csv	Lysine-specific demethylase 2A	KDM2A	Q9Y2K7	CHEMBL1938210	Eraser	0	1 / 0聽聽聽聽聽
16.csv	Lysine-specific demethylase 5C	KDM5C	P41229	CHEMBL2163176	Eraser	0	1 / 0聽聽聽聽聽
16.csv	Alpha-ketoglutarate-dependent dioxygenase FTO	FTO	Q9C0B1	CHEMBL2331065	Oxidoreductase	0	1 / 0聽聽聽聽聽
16.csv	Lysine-specific demethylase 5A	KDM5A	P29375	CHEMBL2424504	Eraser	0	1 / 0聽聽聽聽聽
16.csv	Hypoxia-inducible factor prolyl hydroxylase 1	EGLN2	Q96KS0	CHEMBL3028	Enzyme	0	1 / 0聽聽聽聽聽
16.csv	Lysine-specific demethylase 5B	KDM5B	Q9UGL1	CHEMBL3774295	Eraser	0	1 / 0聽聽聽聽聽
16.csv	Egl nine homolog 1	EGLN1	Q9GZT9	CHEMBL5697	Oxidoreductase	0	1 / 0聽聽聽聽聽
16.csv	Egl nine homolog 3	EGLN3	Q9H6Z9	CHEMBL5705	Enzyme	0	1 / 0聽聽聽聽聽
16.csv	Lysine-specific demethylase 4A	KDM4A	O75164	CHEMBL5896	Eraser	0	1 / 0聽聽聽聽聽
16.csv	Hypoxia-inducible factor 1-alpha inhibitor	HIF1AN	Q9NWT6	CHEMBL5909	Enzyme	0	1 / 0聽聽聽聽聽
16.csv	Lysine-specific demethylase 4D	KDM4D	Q6B0I6	CHEMBL6138	Eraser	0	1 / 0聽聽聽聽聽
16.csv	Lysine-specific demethylase 4C	KDM4C	Q9H3R0	CHEMBL6175	Eraser	0	1 / 0聽聽聽聽聽
16.csv	Aldo-keto reductase family 1 member C1	AKR1C1	Q04828	CHEMBL5905	Enzyme	0	0 / 2聽聽聽聽聽
16.csv	Retinoid X receptor beta	RXRB	P28702	CHEMBL1870	Nuclear receptor	0	0 / 4聽聽聽聽聽
16.csv	Retinoid X receptor gamma	RXRG	P48443	CHEMBL2004	Nuclear receptor	0	0 / 6聽聽聽聽聽
16.csv	Retinoid X receptor alpha	RXRA	P19793	CHEMBL2061	Nuclear receptor	0	0 / 11聽聽聽聽聽
16.csv	Apoptosis regulator Bcl-X	BCL2L1	Q07817	CHEMBL4625	Other ion channel	0	0 / 1聽聽聽聽聽
16.csv	Squalene monooxygenase (by homology)	SQLE	Q14534	CHEMBL3592	Enzyme	0	0 / 1聽聽聽聽聽
16.csv	Tyrosinase	TYR	P14679	CHEMBL1973	Oxidoreductase	0	0 / 1聽聽聽聽聽
16.csv	Glycogen synthase kinase-3 beta	GSK3B	P49841	CHEMBL262	Kinase	0	0 / 1聽聽聽聽聽
16.csv	Dual specificity phosphatase Cdc25A	CDC25A	P30304	CHEMBL3775	Phosphatase	0	0 / 1聽聽聽聽聽
16.csv	Dual specificity phosphatase Cdc25B	CDC25B	P30305	CHEMBL4804	Phosphatase	0	0 / 1聽聽聽聽聽
16.csv	Acetylcholinesterase	ACHE	P22303	CHEMBL220	Hydrolase	0	0 / 2聽聽聽聽聽
16.csv	LDL-associated phospholipase A2	PLA2G7	Q13093	CHEMBL3514	Enzyme	0	0 / 1聽聽聽聽聽
16.csv	Plectin	PLEC	Q15149	CHEMBL1293240	Unclassified protein	0	0 / 1聽聽聽聽聽
16.csv	G-protein coupled receptor 35	GPR35	Q9HC97	CHEMBL1293267	Family A G protein-coupled receptor	0	0 / 2聽聽聽聽聽
16.csv	Protein kinase C delta	PRKCD	Q05655	CHEMBL2996	Kinase	0	0 / 3聽聽聽聽聽
16.csv	Protein kinase C alpha	PRKCA	P17252	CHEMBL299	Kinase	0	0 / 3聽聽聽聽聽
16.csv	Induced myeloid leukemia cell differentiation protein Mcl-1	MCL1	Q07820	CHEMBL4361	Other cytosolic protein	0	0 / 1聽聽聽聽聽
16.csv	Dihydroorotate dehydrogenase	DHODH	Q02127	CHEMBL1966	Oxidoreductase	0	0 / 3聽聽聽聽聽
16.csv	Monoamine oxidase B	MAOB	P27338	CHEMBL2039	Oxidoreductase	0	0 / 2聽聽聽聽聽
16.csv	Estrogen receptor alpha	ESR1	P03372	CHEMBL206	Nuclear receptor	0	0 / 1聽聽聽聽聽
16.csv	Dipeptidyl peptidase IV	DPP4	P27487	CHEMBL284	Protease	0	0 / 1聽聽聽聽聽
16.csv	Transthyretin	TTR	P02766	CHEMBL3194	Secreted protein	0	0 / 2聽聽聽聽聽
16.csv	Urokinase-type plasminogen activator	PLAU	P00749	CHEMBL3286	Protease	0	0 / 2聽聽聽聽聽
16.csv	Cannabinoid receptor 2	CNR2	P34972	CHEMBL253	Family A G protein-coupled receptor	0	0 / 1聽聽聽聽聽
16.csv	Metabotropic glutamate receptor 1	GRM1	Q13255	CHEMBL3772	Family C G protein-coupled receptor	0	0 / 1聽聽聽聽聽
16.csv	PH domain leucine-rich repeat-containing protein phosphatase 2	PHLPP2	Q6ZVD8	CHEMBL1275209	Enzyme	0	0 / 1聽聽聽聽聽
16.csv	DNA polymerase beta	POLB	P06746	CHEMBL2392	Enzyme	0	0 / 1聽聽聽聽聽
16.csv	Delta opioid receptor	OPRD1	P41143	CHEMBL236	Family A G protein-coupled receptor	0	0 / 1聽聽聽聽聽
16.csv	Nitric oxide synthase, inducible (by homology)	NOS2	P35228	CHEMBL4481	Enzyme	0	0 / 1聽聽聽聽聽
16.csv	Cyclooxygenase-1	PTGS1	P23219	CHEMBL221	Oxidoreductase	0	0 / 1聽聽聽聽聽
16.csv	Cyclooxygenase-2	PTGS2	P35354	CHEMBL230	Oxidoreductase	0	0 / 1聽聽聽聽聽
16.csv	Protein-tyrosine phosphatase 1B	PTPN1	P18031	CHEMBL335	Phosphatase	0	0 / 1聽聽聽聽聽
17.csv	Carbonic anhydrase II	CA2	P00918	CHEMBL205	Lyase	0.324628	31 / 45聽聽聽聽聽
17.csv	Carbonic anhydrase VII	CA7	P43166	CHEMBL2326	Lyase	0.324628	9 / 28聽聽聽聽聽
17.csv	Carbonic anhydrase I	CA1	P00915	CHEMBL261	Lyase	0.324628	29 / 44聽聽聽聽聽
17.csv	Carbonic anhydrase XII	CA12	O43570	CHEMBL3242	Lyase	0.324628	17 / 32聽聽聽聽聽
17.csv	Carbonic anhydrase XIV	CA14	Q9ULX7	CHEMBL3510	Lyase	0.324628	10 / 28聽聽聽聽聽
17.csv	Carbonic anhydrase IX	CA9	Q16790	CHEMBL3594	Lyase	0.324628	16 / 30聽聽聽聽聽
17.csv	Carbonic anhydrase III	CA3	P07451	CHEMBL2885	Lyase	0.265882	4 / 3聽聽聽聽聽
17.csv	Carbonic anhydrase VI	CA6	P23280	CHEMBL3025	Lyase	0.265882	8 / 7聽聽聽聽聽
17.csv	Carbonic anhydrase VA	CA5A	P35218	CHEMBL4789	Lyase	0.265882	6 / 5聽聽聽聽聽
17.csv	Carbonic anhydrase IV	CA4	P22748	CHEMBL3729	Lyase	0.208479	3 / 4聽聽聽聽聽
17.csv	Thiopurine S-methyltransferase	TPMT	P51580	CHEMBL2500	Enzyme	0.183364	4 / 4聽聽聽聽聽
17.csv	Transthyretin	TTR	P02766	CHEMBL3194	Secreted protein	0.150098	0 / 7聽聽聽聽聽
17.csv	Carbonic anhydrase VB	CA5B	Q9Y2D0	CHEMBL3969	Lyase	0.141787	5 / 3聽聽聽聽聽
17.csv	Carbonic anhydrase XIII (by homology)	CA13	Q8N1Q1	CHEMBL3912	Lyase	0.141787	2 / 3聽聽聽聽聽
17.csv	Alpha-(1,3)-fucosyltransferase 7	FUT7	Q11130	CHEMBL3596077	Transferase	0.133391	0 / 2聽聽聽聽聽
17.csv	Lysine-specific demethylase 4D-like	KDM4E	B2RXH2	CHEMBL1293226	Eraser	0.133391	4 / 0聽聽聽聽聽
17.csv	Lysine-specific demethylase 4A	KDM4A	O75164	CHEMBL5896	Eraser	0.133391	4 / 0聽聽聽聽聽
17.csv	Lysine-specific demethylase 3A	KDM3A	Q9Y4C1	CHEMBL1938209	Eraser	0.133391	2 / 0聽聽聽聽聽
17.csv	Lysine-specific demethylase 6B	KDM6B	O15054	CHEMBL1938211	Eraser	0.133391	2 / 0聽聽聽聽聽
17.csv	Alpha-ketoglutarate-dependent dioxygenase FTO	FTO	Q9C0B1	CHEMBL2331065	Oxidoreductase	0.133391	2 / 0聽聽聽聽聽
17.csv	Lysine-specific demethylase 4C	KDM4C	Q9H3R0	CHEMBL6175	Eraser	0.133391	4 / 0聽聽聽聽聽
17.csv	Tyrosine-protein kinase FYN	FYN	P06241	CHEMBL1841	Kinase	0.125076	2 / 1聽聽聽聽聽
17.csv	Tyrosine-protein kinase LCK	LCK	P06239	CHEMBL258	Kinase	0.125076	2 / 2聽聽聽聽聽
17.csv	Fructose-1,6-bisphosphatase	FBP1	P09467	CHEMBL3975	Enzyme	0.125076	13 / 0聽聽聽聽聽
17.csv	Aldo-keto-reductase family 1 member C3	AKR1C3	P42330	CHEMBL4681	Enzyme	0.125076	5 / 18聽聽聽聽聽
17.csv	Lysine-specific demethylase 2A	KDM2A	Q9Y2K7	CHEMBL1938210	Eraser	0.125076	3 / 0聽聽聽聽聽
17.csv	Matrix metalloproteinase 9	MMP9	P14780	CHEMBL321	Protease	0.125076	2 / 0聽聽聽聽聽
17.csv	Matrix metalloproteinase 1	MMP1	P03956	CHEMBL332	Protease	0.125076	2 / 0聽聽聽聽聽
17.csv	Matrix metalloproteinase 2	MMP2	P08253	CHEMBL333	Protease	0.125076	2 / 0聽聽聽聽聽
17.csv	Matrix metalloproteinase 8	MMP8	P22894	CHEMBL4588	Protease	0.125076	1 / 0聽聽聽聽聽
17.csv	Squalene monooxygenase (by homology)	SQLE	Q14534	CHEMBL3592	Enzyme	0.125076	0 / 7聽聽聽聽聽
17.csv	DNA polymerase alpha subunit	POLA1	P09884	CHEMBL1828	Transferase	0.116739	0 / 1聽聽聽聽聽
17.csv	DNA polymerase beta	POLB	P06746	CHEMBL2392	Enzyme	0.116739	0 / 1聽聽聽聽聽
17.csv	Plasminogen activator inhibitor-1	SERPINE1	P05121	CHEMBL3475	Secreted protein	0.116739	0 / 8聽聽聽聽聽
17.csv	Tubulin beta-1 chain	TUBB1	Q9H4B7	CHEMBL1915	Structural protein	0.116739	0 / 4聽聽聽聽聽
17.csv	Kynurenine 3-monooxygenase (by homology)	KMO	O15229	CHEMBL2145	Oxidoreductase	0	13 / 0聽聽聽聽聽
17.csv	Low affinity neurotrophin receptor p75NTR	NGFR	P08138	CHEMBL4762	Membrane receptor	0	1 / 0聽聽聽聽聽
17.csv	Thymidylate synthase	TYMS	P04818	CHEMBL1952	Transferase	0	0 / 3聽聽聽聽聽
17.csv	L-lactate dehydrogenase A chain	LDHA	P00338	CHEMBL4835	Enzyme	0	0 / 12聽聽聽聽聽
17.csv	L-lactate dehydrogenase B chain	LDHB	P07195	CHEMBL4940	Enzyme	0	0 / 10聽聽聽聽聽
17.csv	Leucine aminopeptidase	LAP3	P28838	CHEMBL3965	Protease	0	1 / 0聽聽聽聽聽
17.csv	Receptor-type tyrosine-protein phosphatase beta	PTPRB	P23467	CHEMBL2706	Phosphatase	0	2 / 0聽聽聽聽聽
17.csv	Uracil nucleotide/cysteinyl leukotriene receptor	GPR17	Q13304	CHEMBL1075162	Family A G protein-coupled receptor	0	2 / 0聽聽聽聽聽
17.csv	C-terminal-binding protein 2	CTBP2	P56545	CHEMBL3797016	Unclassified protein	0	9 / 0聽聽聽聽聽
17.csv	Macrophage migration inhibitory factor	MIF	P14174	CHEMBL2085	Enzyme	0	1 / 0聽聽聽聽聽
17.csv	Insulin-like growth factor I receptor	IGF1R	P08069	CHEMBL1957	Kinase	0	0 / 2聽聽聽聽聽
17.csv	ALK tyrosine kinase receptor	ALK	Q9UM73	CHEMBL4247	Kinase	0	0 / 2聽聽聽聽聽
17.csv	Steroid 5-alpha-reductase 2	SRD5A2	P31213	CHEMBL1856	Oxidoreductase	0	0 / 12聽聽聽聽聽
17.csv	Phospholipase A2 group 1VB	PLA2G4B	P0C869	CHEMBL4136	Enzyme	0	0 / 12聽聽聽聽聽
17.csv	DNA ligase 1	LIG1	P18858	CHEMBL5694	Enzyme	0	1 / 0聽聽聽聽聽
17.csv	Leukocyte elastase	ELANE	P08246	CHEMBL248	Protease	0	0 / 12聽聽聽聽聽
17.csv	Serine/threonine-protein kinase/endoribonuclease IRE1	ERN1	O75460	CHEMBL1163101	Enzyme	0	1 / 69聽聽聽聽聽
17.csv	Acetylcholinesterase	ACHE	P22303	CHEMBL220	Hydrolase	0	0 / 21聽聽聽聽聽
17.csv	Alpha-L-fucosidase I	FUCA1	P04066	CHEMBL4176	Enzyme	0	10 / 0聽聽聽聽聽
17.csv	Dipeptidyl peptidase IV	DPP4	P27487	CHEMBL284	Protease	0	2 / 0聽聽聽聽聽
17.csv	Metabotropic glutamate receptor 2 (by homology)	GRM2	Q14416	CHEMBL5137	Family C G protein-coupled receptor	0	0 / 29聽聽聽聽聽
17.csv	Solute carrier family 13 member 5	SLC13A5	Q86YT5	CHEMBL3769293	Electrochemical transporter	0	8 / 0聽聽聽聽聽
17.csv	Bifunctional protein NCOAT	OGA	O60502	CHEMBL5921	Enzyme	0	12 / 0聽聽聽聽聽
17.csv	Heat shock protein HSP 90-alpha	HSP90AA1	P07900	CHEMBL3880	Other cytosolic protein	0	0 / 3聽聽聽聽聽
17.csv	Aldose reductase	AKR1B1	P15121	CHEMBL1900	Enzyme	0	28 / 1聽聽聽聽聽
17.csv	Catechol O-methyltransferase (by homology)	COMT	P21964	CHEMBL2023	Transferase	0	0 / 5聽聽聽聽聽
17.csv	Monoamine oxidase A	MAOA	P21397	CHEMBL1951	Oxidoreductase	0	2 / 23聽聽聽聽聽
17.csv	Monoamine oxidase B	MAOB	P27338	CHEMBL2039	Oxidoreductase	0	2 / 62聽聽聽聽聽
17.csv	Apoptosis regulator Bcl-X	BCL2L1	Q07817	CHEMBL4625	Other ion channel	0	0 / 2聽聽聽聽聽
17.csv	Carboxypeptidase A1	CPA1	P15085	CHEMBL2088	Protease	0	10 / 0聽聽聽聽聽
17.csv	Cannabinoid receptor 2	CNR2	P34972	CHEMBL253	Family A G protein-coupled receptor	0	0 / 7聽聽聽聽聽
17.csv	Estrogen receptor beta	ESR2	Q92731	CHEMBL242	Nuclear receptor	0	2 / 6聽聽聽聽聽
17.csv	Equilibrative nucleoside transporter 1	SLC29A1	Q99808	CHEMBL1997	Electrochemical transporter	0	0 / 8聽聽聽聽聽
17.csv	Thymidylate kinase	DTYMK	P23919	CHEMBL4388	Transferase	0	1 / 0聽聽聽聽聽
17.csv	Serum albumin	ALB	P02768	CHEMBL3253	Secreted protein	0	0 / 3聽聽聽聽聽
17.csv	Caspase-3	CASP3	P42574	CHEMBL2334	Protease	0	2 / 0聽聽聽聽聽
17.csv	Testis-specific androgen-binding protein	SHBG	P04278	CHEMBL3305	Secreted protein	0	0 / 1聽聽聽聽聽
17.csv	Cytidine deaminase	CDA	P32320	CHEMBL4502	Enzyme	0	16 / 0聽聽聽聽聽
17.csv	Retinoid X receptor beta	RXRB	P28702	CHEMBL1870	Nuclear receptor	0	0 / 1聽聽聽聽聽
17.csv	Retinoid X receptor gamma	RXRG	P48443	CHEMBL2004	Nuclear receptor	0	0 / 2聽聽聽聽聽
17.csv	Retinoid X receptor alpha	RXRA	P19793	CHEMBL2061	Nuclear receptor	0	0 / 2聽聽聽聽聽
17.csv	Peptidyl-prolyl cis-trans isomerase NIMA-interacting 1	PIN1	Q13526	CHEMBL2288	Enzyme	0	2 / 0聽聽聽聽聽
17.csv	Endothelin-converting enzyme 1	ECE1	P42892	CHEMBL4791	Protease	0	2 / 0聽聽聽聽聽
17.csv	DNA-(apurinic or apyrimidinic site) lyase	APEX1	P27695	CHEMBL5619	Enzyme	0	1 / 0聽聽聽聽聽
17.csv	Adenosine deaminase	ADA	P00813	CHEMBL1910	Hydrolase	0	3 / 0聽聽聽聽聽
17.csv	AMP deaminase 3	AMPD3	Q01432	CHEMBL2912	Enzyme	0	3 / 0聽聽聽聽聽
17.csv	Tyrosinase	TYR	P14679	CHEMBL1973	Oxidoreductase	0	0 / 3聽聽聽聽聽
17.csv	Angiotensin-converting enzyme	ACE	P12821	CHEMBL1808	Protease	0	5 / 0聽聽聽聽聽
17.csv	Transient receptor potential cation channel subfamily M member 8 (by homology)	TRPM8	Q7Z2W7	CHEMBL1075319	Voltage-gated ion channel	0	0 / 2聽聽聽聽聽
17.csv	NAALADase II	NAALAD2	Q9Y3Q0	CHEMBL2609	Protease	0	5 / 0聽聽聽聽聽
17.csv	Fatty acid binding protein adipocyte	FABP4	P15090	CHEMBL2083	Fatty acid binding protein family	0	0 / 1聽聽聽聽聽
17.csv	Fatty acid binding protein muscle	FABP3	P05413	CHEMBL3344	Fatty acid binding protein family	0	0 / 1聽聽聽聽聽
17.csv	Fatty acid binding protein epidermal	FABP5	Q01469	CHEMBL3674	Fatty acid binding protein family	0	0 / 1聽聽聽聽聽
17.csv	Induced myeloid leukemia cell differentiation protein Mcl-1	MCL1	Q07820	CHEMBL4361	Other cytosolic protein	0	0 / 7聽聽聽聽聽
17.csv	Neprilysin	MME	P08473	CHEMBL1944	Protease	0	5 / 0聽聽聽聽聽
17.csv	Intercellular adhesion molecule (ICAM-1), Integrin alpha-L/beta-2	ITGAL ICAM1 ITGB2	P20701 P05362 P05107	CHEMBL2096661	Membrane receptor	0	2 / 0聽聽聽聽聽
17.csv	Gamma-glutamyl hydrolase	GGH	Q92820	CHEMBL2223	Protease	0	1 / 0聽聽聽聽聽
17.csv	Estrogen receptor alpha	ESR1	P03372	CHEMBL206	Nuclear receptor	0	0 / 2聽聽聽聽聽
17.csv	Thromboxane-A synthase	TBXAS1	P24557	CHEMBL1835	Cytochrome P450	0	0 / 4聽聽聽聽聽
17.csv	Matriptase	ST14	Q9Y5Y6	CHEMBL3018	Protease	0	0 / 1聽聽聽聽聽
17.csv	Urokinase-type plasminogen activator	PLAU	P00749	CHEMBL3286	Protease	0	0 / 1聽聽聽聽聽
17.csv	HMG-CoA reductase	HMGCR	P04035	CHEMBL402	Oxidoreductase	0	0 / 1聽聽聽聽聽
17.csv	Monocarboxylate transporter 1 (by homology)	SLC16A1	P53985	CHEMBL4360	Electrochemical transporter	0	2 / 0聽聽聽聽聽
17.csv	Serine/threonine-protein kinase Aurora-B	AURKB	Q96GD4	CHEMBL2185	Kinase	0	0 / 1聽聽聽聽聽
17.csv	Tyrosine-protein kinase SRC	SRC	P12931	CHEMBL267	Kinase	0	0 / 1聽聽聽聽聽
18.csv	Serine/threonine-protein kinase/endoribonuclease IRE1	ERN1	O75460	CHEMBL1163101	Enzyme	0.0981627	19 / 67聽聽聽聽聽
18.csv	Carbonic anhydrase II	CA2	P00918	CHEMBL205	Lyase	0.0981627	0 / 39聽聽聽聽聽
18.csv	Carbonic anhydrase VII	CA7	P43166	CHEMBL2326	Lyase	0.0981627	0 / 25聽聽聽聽聽
18.csv	Carbonic anhydrase III	CA3	P07451	CHEMBL2885	Lyase	0.0981627	0 / 3聽聽聽聽聽
18.csv	Carbonic anhydrase VI	CA6	P23280	CHEMBL3025	Lyase	0.0981627	0 / 6聽聽聽聽聽
18.csv	Carbonic anhydrase XIV	CA14	Q9ULX7	CHEMBL3510	Lyase	0.0981627	0 / 25聽聽聽聽聽
18.csv	Carbonic anhydrase VA	CA5A	P35218	CHEMBL4789	Lyase	0.0981627	0 / 4聽聽聽聽聽
18.csv	Carbonic anhydrase I	CA1	P00915	CHEMBL261	Lyase	0.0893705	1 / 36聽聽聽聽聽
18.csv	Carbonic anhydrase XII	CA12	O43570	CHEMBL3242	Lyase	0.0893705	1 / 29聽聽聽聽聽
18.csv	Carbonic anhydrase IX	CA9	Q16790	CHEMBL3594	Lyase	0.0893705	1 / 27聽聽聽聽聽
18.csv	Acetylcholinesterase	ACHE	P22303	CHEMBL220	Hydrolase	0.08057	0 / 25聽聽聽聽聽
18.csv	Transthyretin	TTR	P02766	CHEMBL3194	Secreted protein	0.08057	0 / 7聽聽聽聽聽
18.csv	Carbonic anhydrase IV	CA4	P22748	CHEMBL3729	Lyase	0.0717872	0 / 4聽聽聽聽聽
18.csv	DNA excision repair protein ERCC-5	ERCC5	P28715	CHEMBL4736	Other nuclear protein	0.0717872	8 / 0聽聽聽聽聽
18.csv	Flap endonuclease 1	FEN1	P39748	CHEMBL5027	Enzyme	0.0717872	12 / 0聽聽聽聽聽
18.csv	Tubulin beta-1 chain	TUBB1	Q9H4B7	CHEMBL1915	Structural protein	0	0 / 20聽聽聽聽聽
18.csv	HMG-CoA reductase	HMGCR	P04035	CHEMBL402	Oxidoreductase	0	0 / 4聽聽聽聽聽
18.csv	Alpha-(1,3)-fucosyltransferase 7	FUT7	Q11130	CHEMBL3596077	Transferase	0	0 / 2聽聽聽聽聽
18.csv	Carbonic anhydrase VB	CA5B	Q9Y2D0	CHEMBL3969	Lyase	0	0 / 2聽聽聽聽聽
18.csv	Carbonic anhydrase XIII (by homology)	CA13	Q8N1Q1	CHEMBL3912	Lyase	0	0 / 2聽聽聽聽聽
18.csv	Aldo-keto-reductase family 1 member C3	AKR1C3	P42330	CHEMBL4681	Enzyme	0	0 / 2聽聽聽聽聽
18.csv	Protein tyrosine kinase 2 beta	PTK2B	Q14289	CHEMBL5469	Kinase	0	1 / 0聽聽聽聽聽
18.csv	Lysine-specific demethylase 4C	KDM4C	Q9H3R0	CHEMBL6175	Eraser	0	1 / 0聽聽聽聽聽
18.csv	Troponin, cardiac muscle	TNNC1 TNNT2 TNNI3	P63316 P45379 P19429	CHEMBL2095202	Unclassified protein	0	1 / 0聽聽聽聽聽
18.csv	Matriptase	ST14	Q9Y5Y6	CHEMBL3018	Protease	0	0 / 2聽聽聽聽聽
18.csv	Urokinase-type plasminogen activator	PLAU	P00749	CHEMBL3286	Protease	0	0 / 2聽聽聽聽聽
18.csv	Tyrosinase (by homology)	TYR	P14679	CHEMBL1973	Oxidoreductase	0	0 / 3聽聽聽聽聽
18.csv	DNA polymerase alpha subunit	POLA1	P09884	CHEMBL1828	Transferase	0	0 / 1聽聽聽聽聽
18.csv	DNA polymerase beta	POLB	P06746	CHEMBL2392	Enzyme	0	0 / 1聽聽聽聽聽
18.csv	Catechol O-methyltransferase (by homology)	COMT	P21964	CHEMBL2023	Transferase	0	4 / 5聽聽聽聽聽
18.csv	Ribosomal protein S6 kinase alpha 3	RPS6KA3	P51812	CHEMBL2345	Kinase	0	1 / 0聽聽聽聽聽
18.csv	Thiopurine S-methyltransferase	TPMT	P51580	CHEMBL2500	Enzyme	0	0 / 4聽聽聽聽聽
18.csv	Serine/threonine-protein kinase PLK3	PLK3	Q9H4B4	CHEMBL4897	Kinase	0	1 / 0聽聽聽聽聽
18.csv	Tyrosine-protein kinase BTK	BTK	Q06187	CHEMBL5251	Kinase	0	1 / 0聽聽聽聽聽
18.csv	Squalene monooxygenase (by homology)	SQLE	Q14534	CHEMBL3592	Enzyme	0	0 / 4聽聽聽聽聽
18.csv	Dihydroorotate dehydrogenase (by homology)	DHODH	Q02127	CHEMBL1966	Oxidoreductase	0	5 / 0聽聽聽聽聽
18.csv	Plasminogen activator inhibitor-1	SERPINE1	P05121	CHEMBL3475	Secreted protein	0	0 / 4聽聽聽聽聽
18.csv	Induced myeloid leukemia cell differentiation protein Mcl-1	MCL1	Q07820	CHEMBL4361	Other cytosolic protein	0	0 / 8聽聽聽聽聽
18.csv	Calcium-activated potassium channel subunit alpha-1	KCNMA1	Q12791	CHEMBL4304	Voltage-gated ion channel	0	2 / 0聽聽聽聽聽
18.csv	Serotonin 2a (5-HT2a) receptor (by homology)	HTR2A	P28223	CHEMBL224	Family A G protein-coupled receptor	0	0 / 2聽聽聽聽聽
18.csv	Receptor protein-tyrosine kinase erbB-2	ERBB2	P04626	CHEMBL1824	Kinase	0	2 / 0聽聽聽聽聽
18.csv	MAP kinase p38 alpha	MAPK14	Q16539	CHEMBL260	Kinase	0	3 / 0聽聽聽聽聽
18.csv	Cytochrome P450 2C9	CYP2C9	P11712	CHEMBL3397	Cytochrome P450	0	1 / 0聽聽聽聽聽
18.csv	Methionine aminopeptidase 2	METAP2	P50579	CHEMBL3922	Protease	0	1 / 0聽聽聽聽聽
18.csv	MAP kinase ERK2	MAPK1	P28482	CHEMBL4040	Kinase	0	3 / 0聽聽聽聽聽
18.csv	Cathepsin (B and K)	CTSB	P07858	CHEMBL4072	Protease	0	1 / 0聽聽聽聽聽
18.csv	Thromboxane-A synthase	TBXAS1	P24557	CHEMBL1835	Cytochrome P450	0	1 / 0聽聽聽聽聽
18.csv	Tubulin beta-3 chain	TUBB3	Q13509	CHEMBL2597	Structural protein	0	0 / 1聽聽聽聽聽
18.csv	P-glycoprotein 1	ABCB1	P08183	CHEMBL4302	Primary active transporter	0	0 / 7聽聽聽聽聽
18.csv	Monoamine oxidase B	MAOB	P27338	CHEMBL2039	Oxidoreductase	0	0 / 31聽聽聽聽聽
18.csv	Acyl coenzyme A:cholesterol acyltransferase	CES1	P23141	CHEMBL2265	Enzyme	0	0 / 4聽聽聽聽聽
18.csv	Carboxylesterase 2	CES2	O00748	CHEMBL3180	Enzyme	0	0 / 4聽聽聽聽聽
18.csv	Egl nine homolog 1	EGLN1	Q9GZT9	CHEMBL5697	Oxidoreductase	0	1 / 0聽聽聽聽聽
18.csv	Estrogen receptor alpha	ESR1	P03372	CHEMBL206	Nuclear receptor	0	0 / 7聽聽聽聽聽
18.csv	Estrogen receptor beta	ESR2	Q92731	CHEMBL242	Nuclear receptor	0	0 / 5聽聽聽聽聽
18.csv	Poly [ADP-ribose] polymerase-1	PARP1	P09874	CHEMBL3105	Enzyme	0	0 / 1聽聽聽聽聽
18.csv	Ribonuclease H1	RNASEH1	O60930	CHEMBL5893	Enzyme	0	1 / 0聽聽聽聽聽
18.csv	ATP-binding cassette sub-family G member 2	ABCG2	Q9UNQ0	CHEMBL5393	Primary active transporter	0	0 / 16聽聽聽聽聽
18.csv	Adenosine A3 receptor	ADORA3	P0DMS8	CHEMBL256	Family A G protein-coupled receptor	0	1 / 0聽聽聽聽聽
18.csv	MAP kinase ERK1	MAPK3	P27361	CHEMBL3385	Kinase	0	1 / 0聽聽聽聽聽
18.csv	Apoptosis regulator Bcl-2	BCL2	P10415	CHEMBL4860	Other ion channel	0	0 / 5聽聽聽聽聽
18.csv	Leukocyte elastase	ELANE	P08246	CHEMBL248	Protease	0	0 / 12聽聽聽聽聽
18.csv	Melatonin receptor 1A	MTNR1A	P48039	CHEMBL1945	Family A G protein-coupled receptor	0	0 / 1聽聽聽聽聽
18.csv	Fatty acid synthase	FASN	P49327	CHEMBL4158	Transferase	0	0 / 1聽聽聽聽聽
18.csv	Cytochrome P450 1B1	CYP1B1	Q16678	CHEMBL4878	Cytochrome P450	0	0 / 16聽聽聽聽聽
18.csv	Dual specificity mitogen-activated protein kinase kinase 1	MAP2K1	Q02750	CHEMBL3587	Kinase	0	5 / 0聽聽聽聽聽
18.csv	Solute carrier family 22 member 12	SLC22A12	Q96S37	CHEMBL6120	Electrochemical transporter	0	1 / 0聽聽聽聽聽
18.csv	Thrombin	F2	P00734	CHEMBL204	Protease	0	2 / 2聽聽聽聽聽
18.csv	Androgen Receptor	AR	P10275	CHEMBL1871	Nuclear receptor	0	0 / 6聽聽聽聽聽
18.csv	Aryl hydrocarbon receptor	AHR	P35869	CHEMBL3201	Transcription factor	0	0 / 2聽聽聽聽聽
18.csv	Insulin-like growth factor I receptor	IGF1R	P08069	CHEMBL1957	Kinase	0	0 / 1聽聽聽聽聽
18.csv	ALK tyrosine kinase receptor	ALK	Q9UM73	CHEMBL4247	Kinase	0	0 / 1聽聽聽聽聽
18.csv	Bcl2-antagonist of cell death (BAD)	BAD	Q92934	CHEMBL3817	Other cytosolic protein	0	0 / 1聽聽聽聽聽
18.csv	Proteasome Macropain subunit MB1	PSMB5	P28074	CHEMBL4662	Protease	0	0 / 1聽聽聽聽聽
18.csv	Calmodulin	CALM1	P62158	CHEMBL6093	Unclassified protein	0	0 / 1聽聽聽聽聽
18.csv	Cannabinoid receptor 1	CNR1	P21554	CHEMBL218	Family A G protein-coupled receptor	0	0 / 4聽聽聽聽聽
18.csv	Cannabinoid receptor 2	CNR2	P34972	CHEMBL253	Family A G protein-coupled receptor	0	0 / 5聽聽聽聽聽
18.csv	Cytochrome P450 19A1	CYP19A1	P11511	CHEMBL1978	Cytochrome P450	0	0 / 6聽聽聽聽聽
18.csv	Steroid 5-alpha-reductase 2	SRD5A2	P31213	CHEMBL1856	Oxidoreductase	0	0 / 4聽聽聽聽聽
18.csv	Aldehyde dehydrogenase 1A1	ALDH1A1	P00352	CHEMBL3577	Enzyme	0	0 / 1聽聽聽聽聽
18.csv	Equilibrative nucleoside transporter 1	SLC29A1	Q99808	CHEMBL1997	Electrochemical transporter	0	0 / 7聽聽聽聽聽
18.csv	Metabotropic glutamate receptor 2 (by homology)	GRM2	Q14416	CHEMBL5137	Family C G protein-coupled receptor	0	0 / 11聽聽聽聽聽
18.csv	Cathepsin D	CTSD	P07339	CHEMBL2581	Protease	0	0 / 1聽聽聽聽聽
18.csv	Melanin-concentrating hormone receptor 1	MCHR1	Q99705	CHEMBL344	Family A G protein-coupled receptor	0	0 / 11聽聽聽聽聽
18.csv	Aldose reductase	AKR1B1	P15121	CHEMBL1900	Enzyme	0	0 / 4聽聽聽聽聽
18.csv	Dual-specificity tyrosine-phosphorylation regulated kinase 1A	DYRK1A	Q13627	CHEMBL2292	Kinase	0	0 / 1聽聽聽聽聽
18.csv	Phosphodiesterase 4D	PDE4D	Q08499	CHEMBL288	Phosphodiesterase	0	0 / 4聽聽聽聽聽
18.csv	Serum albumin	ALB	P02768	CHEMBL3253	Secreted protein	0	0 / 1聽聽聽聽聽
18.csv	Steryl-sulfatase	STS	P08842	CHEMBL3559	Enzyme	0	0 / 4聽聽聽聽聽
18.csv	Dual specificty protein kinase CLK1	CLK1	P49759	CHEMBL4224	Kinase	0	0 / 1聽聽聽聽聽
18.csv	Dual specificity tyrosine-phosphorylation-regulated kinase 1B	DYRK1B	Q9Y463	CHEMBL5543	Kinase	0	0 / 1聽聽聽聽聽
18.csv	Monoamine oxidase A	MAOA	P21397	CHEMBL1951	Oxidoreductase	0	0 / 7聽聽聽聽聽
18.csv	Cytochrome P450 1A1	CYP1A1	P04798	CHEMBL2231	Cytochrome P450	0	0 / 6聽聽聽聽聽
18.csv	L-lactate dehydrogenase A chain	LDHA	P00338	CHEMBL4835	Enzyme	0	0 / 1聽聽聽聽聽
18.csv	L-lactate dehydrogenase B chain	LDHB	P07195	CHEMBL4940	Enzyme	0	0 / 1聽聽聽聽聽
18.csv	Beta amyloid A4 protein	APP	P05067	CHEMBL2487	Membrane receptor	0	0 / 3聽聽聽聽聽
18.csv	Rho-associated protein kinase 2	ROCK2	O75116	CHEMBL2973	Kinase	0	0 / 1聽聽聽聽聽
18.csv	Dopamine transporter	SLC6A3	Q01959	CHEMBL238	Electrochemical transporter	0	0 / 4聽聽聽聽聽
18.csv	Tyrosine-protein kinase SYK	SYK	P43405	CHEMBL2599	Kinase	0	0 / 1聽聽聽聽聽
18.csv	Serotonin transporter (by homology)	SLC6A4	P31645	CHEMBL228	Electrochemical transporter	0	0 / 3聽聽聽聽聽
19.csv	Acetylcholinesterase	ACHE	P22303	CHEMBL220	Hydrolase	0.276836	0 / 3聽聽聽聽聽
19.csv	Nuclear factor NF-kappa-B p105 subunit	NFKB1	P19838	CHEMBL3251	Other cytosolic protein	0.276836	0 / 2聽聽聽聽聽
19.csv	Carbonic anhydrase II	CA2	P00918	CHEMBL205	Lyase	0.0619149	0 / 6聽聽聽聽聽
19.csv	Carbonic anhydrase VII	CA7	P43166	CHEMBL2326	Lyase	0.0619149	0 / 16聽聽聽聽聽
19.csv	Carbonic anhydrase I	CA1	P00915	CHEMBL261	Lyase	0.0619149	0 / 14聽聽聽聽聽
19.csv	Carbonic anhydrase III	CA3	P07451	CHEMBL2885	Lyase	0.0619149	0 / 5聽聽聽聽聽
19.csv	Carbonic anhydrase VI	CA6	P23280	CHEMBL3025	Lyase	0.0619149	0 / 7聽聽聽聽聽
19.csv	Carbonic anhydrase XII	CA12	O43570	CHEMBL3242	Lyase	0.0619149	0 / 29聽聽聽聽聽
19.csv	Carbonic anhydrase XIV	CA14	Q9ULX7	CHEMBL3510	Lyase	0.0619149	0 / 13聽聽聽聽聽
19.csv	Carbonic anhydrase IX	CA9	Q16790	CHEMBL3594	Lyase	0.0619149	0 / 34聽聽聽聽聽
19.csv	Carbonic anhydrase IV	CA4	P22748	CHEMBL3729	Lyase	0.0619149	0 / 6聽聽聽聽聽
19.csv	Carbonic anhydrase XIII (by homology)	CA13	Q8N1Q1	CHEMBL3912	Lyase	0.0619149	0 / 17聽聽聽聽聽
19.csv	Carbonic anhydrase VB	CA5B	Q9Y2D0	CHEMBL3969	Lyase	0.0619149	0 / 10聽聽聽聽聽
19.csv	Carbonic anhydrase VA	CA5A	P35218	CHEMBL4789	Lyase	0.0619149	0 / 10聽聽聽聽聽
19.csv	Monoamine oxidase A	MAOA	P21397	CHEMBL1951	Oxidoreductase	0.0414703	0 / 15聽聽聽聽聽
19.csv	Quinone reductase 1	NQO1	P15559	CHEMBL3623	Enzyme	0.0312266	0 / 1聽聽聽聽聽
19.csv	Estrogen receptor alpha	ESR1	P03372	CHEMBL206	Nuclear receptor	0.0312266	0 / 20聽聽聽聽聽
19.csv	Estrogen receptor beta	ESR2	Q92731	CHEMBL242	Nuclear receptor	0.0312266	0 / 29聽聽聽聽聽
19.csv	Cytochrome P450 1A2	CYP1A2	P05177	CHEMBL3356	Cytochrome P450	0.0312266	0 / 5聽聽聽聽聽
19.csv	Cytochrome P450 1B1	CYP1B1	Q16678	CHEMBL4878	Cytochrome P450	0.0312266	0 / 2聽聽聽聽聽
19.csv	D-amino-acid oxidase	DAO	P14920	CHEMBL5485	Enzyme	0	0 / 1聽聽聽聽聽
19.csv	Serotonin 2c (5-HT2c) receptor	HTR2C	P28335	CHEMBL225	Family A G protein-coupled receptor	0	0 / 1聽聽聽聽聽
19.csv	Adenosine A2a receptor	ADORA2A	P29274	CHEMBL251	Family A G protein-coupled receptor	0	0 / 1聽聽聽聽聽
19.csv	Xanthine dehydrogenase	XDH	P47989	CHEMBL1929	Oxidoreductase	0	0 / 1聽聽聽聽聽
19.csv	Epidermal growth factor receptor erbB1	EGFR	P00533	CHEMBL203	Kinase	0	0 / 2聽聽聽聽聽
19.csv	Arachidonate 5-lipoxygenase	ALOX5	P09917	CHEMBL215	Oxidoreductase	0	0 / 1聽聽聽聽聽
19.csv	Carbonyl reductase [NADPH] 1	CBR1	P16152	CHEMBL5586	Enzyme	0	0 / 1聽聽聽聽聽
19.csv	Estradiol 17-beta-dehydrogenase 3	HSD17B3	P37058	CHEMBL4234	Enzyme	0	0 / 6聽聽聽聽聽
19.csv	Voltage-gated potassium channel subunit Kv1.5	KCNA5	P22460	CHEMBL4306	Voltage-gated ion channel	0	0 / 1聽聽聽聽聽
19.csv	Voltage-gated potassium channel subunit Kv1.3	KCNA3	P22001	CHEMBL4633	Voltage-gated ion channel	0	0 / 4聽聽聽聽聽
19.csv	Leukocyte elastase	ELANE	P08246	CHEMBL248	Protease	0	0 / 1聽聽聽聽聽
19.csv	Lysosomal protective protein	CTSA	P10619	CHEMBL6115	Protease	0	0 / 1聽聽聽聽聽
19.csv	G-protein coupled receptor 35	GPR35	Q9HC97	CHEMBL1293267	Family A G protein-coupled receptor	0	0 / 1聽聽聽聽聽
19.csv	Receptor protein-tyrosine kinase erbB-2	ERBB2	P04626	CHEMBL1824	Kinase	0	0 / 1聽聽聽聽聽
19.csv	Aldose reductase	AKR1B1	P15121	CHEMBL1900	Enzyme	0	0 / 5聽聽聽聽聽
19.csv	Cyclin-dependent kinase 4/cyclin D1	CCND1 CDK4	P24385 P11802	CHEMBL1907601	Kinase	0	0 / 1聽聽聽聽聽
19.csv	Platelet-derived growth factor receptor beta	PDGFRB	P09619	CHEMBL1913	Kinase	0	0 / 1聽聽聽聽聽
19.csv	Vascular endothelial growth factor receptor 3	FLT4	P35916	CHEMBL1955	Kinase	0	0 / 1聽聽聽聽聽
19.csv	Insulin-like growth factor I receptor	IGF1R	P08069	CHEMBL1957	Kinase	0	0 / 1聽聽聽聽聽
19.csv	Insulin receptor	INSR	P06213	CHEMBL1981	Kinase	0	0 / 1聽聽聽聽聽
19.csv	Cyclin-dependent kinase 2/cyclin A	CDK2 CCNA1 CCNA2	P24941 P78396 P20248	CHEMBL2094128	Other cytosolic protein	0	0 / 1聽聽聽聽聽
19.csv	Serine/threonine-protein kinase Aurora-B	AURKB	Q96GD4	CHEMBL2185	Kinase	0	0 / 1聽聽聽聽聽
19.csv	Glycogen synthase kinase-3 beta	GSK3B	P49841	CHEMBL262	Kinase	0	0 / 1聽聽聽聽聽
19.csv	Tyrosine-protein kinase SRC	SRC	P12931	CHEMBL267	Kinase	0	0 / 1聽聽聽聽聽
19.csv	Focal adhesion kinase 1	PTK2	Q05397	CHEMBL2695	Kinase	0	0 / 1聽聽聽聽聽
19.csv	Vascular endothelial growth factor receptor 2	KDR	P35968	CHEMBL279	Kinase	0	0 / 1聽聽聽聽聽
19.csv	Serine/threonine-protein kinase PLK1	PLK1	P53350	CHEMBL3024	Kinase	0	0 / 1聽聽聽聽聽
19.csv	Casein kinase II alpha	CSNK2A1	P68400	CHEMBL3629	Kinase	0	0 / 1聽聽聽聽聽
19.csv	Hepatocyte growth factor receptor	MET	P08581	CHEMBL3717	Kinase	0	0 / 1聽聽聽聽聽
19.csv	Serine/threonine-protein kinase PLK4	PLK4	O00444	CHEMBL3788	Kinase	0	0 / 1聽聽聽聽聽
19.csv	Tyrosine-protein kinase TIE-2	TEK	Q02763	CHEMBL4128	Kinase	0	0 / 1聽聽聽聽聽
19.csv	Serine/threonine-protein kinase AKT	AKT1	P31749	CHEMBL4282	Kinase	0	0 / 1聽聽聽聽聽
19.csv	Serine/threonine-protein kinase Aurora-A	AURKA	O14965	CHEMBL4722	Kinase	0	0 / 1聽聽聽聽聽
19.csv	Beta-secretase 1	BACE1	P56817	CHEMBL4822	Protease	0	0 / 2聽聽聽聽聽
19.csv	Mitogen-activated protein kinase kinase kinase 8	MAP3K8	P41279	CHEMBL4899	Kinase	0	0 / 1聽聽聽聽聽
19.csv	Serine/threonine-protein kinase B-raf	BRAF	P15056	CHEMBL5145	Kinase	0	0 / 1聽聽聽聽聽
19.csv	Ephrin receptor	EPHB4	P54760	CHEMBL5147	Kinase	0	0 / 1聽聽聽聽聽
19.csv	Heat shock 70 kDa protein 1	HSPA1A	P0DMV8	CHEMBL5460	Other cytosolic protein	0	0 / 1聽聽聽聽聽
19.csv	NUAK family SNF1-like kinase 1	NUAK1	O60285	CHEMBL5784	Kinase	0	0 / 1聽聽聽聽聽
19.csv	Squalene monooxygenase (by homology)	SQLE	Q14534	CHEMBL3592	Enzyme	0	0 / 1聽聽聽聽聽
19.csv	Tyrosine-protein kinase FGR (by homology)	FGR	P09769	CHEMBL4454	Kinase	0	0 / 1聽聽聽聽聽
19.csv	Tyrosine-protein kinase Lyn (by homology)	LYN	P07948	CHEMBL3905	Kinase	0	0 / 1聽聽聽聽聽
19.csv	Dopamine D4 receptor	DRD4	P21917	CHEMBL219	Family A G protein-coupled receptor	0	0 / 2聽聽聽聽聽
19.csv	Glutathione reductase	GSR	P00390	CHEMBL2755	Oxidoreductase	0	0 / 1聽聽聽聽聽
19.csv	Monoamine oxidase B	MAOB	P27338	CHEMBL2039	Oxidoreductase	0	0 / 7聽聽聽聽聽
19.csv	G-protein coupled receptor 55	GPR55	Q9Y2T6	CHEMBL1075322	Family A G protein-coupled receptor	0	0 / 2聽聽聽聽聽
19.csv	Steroid 5-alpha-reductase 1	SRD5A1	P18405	CHEMBL1787	Oxidoreductase	0	0 / 2聽聽聽聽聽
19.csv	Cannabinoid receptor 1 (by homology)	CNR1	P21554	CHEMBL218	Family A G protein-coupled receptor	0	0 / 1聽聽聽聽聽
19.csv	Cyclooxygenase-2	PTGS2	P35354	CHEMBL230	Oxidoreductase	0	0 / 1聽聽聽聽聽
19.csv	Aldo-keto-reductase family 1 member C3	AKR1C3	P42330	CHEMBL4681	Enzyme	0	0 / 1聽聽聽聽聽
19.csv	Exportin-1	XPO1	O14980	CHEMBL5661	Unclassified protein	0	0 / 1聽聽聽聽聽
19.csv	Aldo-keto reductase family 1 member C1	AKR1C1	Q04828	CHEMBL5905	Enzyme	0	0 / 1聽聽聽聽聽
19.csv	Aldehyde dehydrogenase	ALDH2	P05091	CHEMBL1935	Oxidoreductase	0	0 / 1聽聽聽聽聽
19.csv	Thromboxane A2 receptor	TBXA2R	P21731	CHEMBL2069	Family A G protein-coupled receptor	0	0 / 2聽聽聽聽聽
19.csv	Macrophage migration inhibitory factor	MIF	P14174	CHEMBL2085	Enzyme	0	0 / 1聽聽聽聽聽
19.csv	Toll-like receptor (TLR7/TLR9)	TLR9	Q9NR96	CHEMBL5804	Toll-like and Il-1 receptors	0	0 / 1聽聽聽聽聽
2.csv	Histone deacetylase 3	HDAC3	O15379	CHEMBL1829	Eraser	0.105844	0 / 1聽聽聽聽聽
2.csv	Carbonic anhydrase I	CA1	P00915	CHEMBL261	Lyase	0.0443083	10 / 0聽聽聽聽聽
2.csv	Carbonic anhydrase IX	CA9	Q16790	CHEMBL3594	Lyase	0.0443083	6 / 0聽聽聽聽聽
2.csv	Egl nine homolog 1	EGLN1	Q9GZT9	CHEMBL5697	Oxidoreductase	0.0339707	0 / 2聽聽聽聽聽
2.csv	GABA transporter 1	SLC6A1	P30531	CHEMBL1903	Electrochemical transporter	0	0 / 1聽聽聽聽聽
2.csv	GABA-A receptor; alpha-1/beta-2/gamma-2	GABRA1 GABRB2 GABRG2	P14867 P47870 P18507	CHEMBL2095172	Ligand-gated ion channel	0	0 / 1聽聽聽聽聽
2.csv	GABA A receptor alpha-3/beta-2/gamma-2	GABRA3 GABRB2 GABRG2	P34903 P47870 P18507	CHEMBL2111339	Ligand-gated ion channel	0	0 / 1聽聽聽聽聽
2.csv	GABA A receptor alpha-2/beta-2/gamma-2	GABRA2 GABRB2 GABRG2	P47869 P47870 P18507	CHEMBL2111413	Ligand-gated ion channel	0	0 / 2聽聽聽聽聽
2.csv	GABA-B receptor	GABBR2 GABBR1	O75899 Q9UBS5	CHEMBL2111463	Family C G protein-coupled receptor	0	0 / 1聽聽聽聽聽
2.csv	GABA receptor rho-1 subunit	GABRR1	P24046	CHEMBL3561	Ligand-gated ion channel	0	0 / 1聽聽聽聽聽
2.csv	GABA transporter 3	SLC6A11	P48066	CHEMBL5208	Electrochemical transporter	0	0 / 1聽聽聽聽聽
2.csv	Solute carrier family 22 member 6 (by homology)	SLC22A6	Q4U2R8	CHEMBL1641347	Electrochemical transporter	0	0 / 2聽聽聽聽聽
2.csv	GABA transporter 2 (by homology)	SLC6A13	Q9NSD5	CHEMBL4535	Electrochemical transporter	0	0 / 1聽聽聽聽聽
2.csv	Estrogen receptor beta	ESR2	Q92731	CHEMBL242	Nuclear receptor	0	1 / 0聽聽聽聽聽
2.csv	Toll-like receptor 4 (by homology)	TLR4	O00206	CHEMBL5255	Toll-like and Il-1 receptors	0	1 / 0聽聽聽聽聽
2.csv	Fatty acid binding protein adipocyte	FABP4	P15090	CHEMBL2083	Fatty acid binding protein family	0	0 / 1聽聽聽聽聽
2.csv	Peroxisome proliferator-activated receptor alpha	PPARA	Q07869	CHEMBL239	Nuclear receptor	0	0 / 3聽聽聽聽聽
2.csv	Fatty acid binding protein muscle	FABP3	P05413	CHEMBL3344	Fatty acid binding protein family	0	0 / 1聽聽聽聽聽
2.csv	Fatty acid binding protein epidermal	FABP5	Q01469	CHEMBL3674	Fatty acid binding protein family	0	0 / 1聽聽聽聽聽
2.csv	Peroxisome proliferator-activated receptor delta	PPARD	Q03181	CHEMBL3979	Nuclear receptor	0	0 / 2聽聽聽聽聽
2.csv	Free fatty acid receptor 1	FFAR1	O14842	CHEMBL4422	Family A G protein-coupled receptor	0	0 / 1聽聽聽聽聽
2.csv	Fatty acid binding protein intestinal	FABP2	P12104	CHEMBL4879	Fatty acid binding protein family	0	0 / 1聽聽聽聽聽
2.csv	ATP-citrate synthase	ACLY	P53396	CHEMBL3720	Enzyme	0	0 / 1聽聽聽聽聽
2.csv	11-beta-hydroxysteroid dehydrogenase 1	HSD11B1	P28845	CHEMBL4235	Enzyme	0	0 / 3聽聽聽聽聽
2.csv	Neuronal acetylcholine receptor protein alpha-7 subunit (by homology)	CHRNA7	P36544	CHEMBL2492	Ligand-gated ion channel	0	0 / 2聽聽聽聽聽
2.csv	Beta-glucocerebrosidase	GBA	P04062	CHEMBL2179	Enzyme	0	3 / 0聽聽聽聽聽
2.csv	Androgen Receptor	AR	P10275	CHEMBL1871	Nuclear receptor	0	0 / 4聽聽聽聽聽
2.csv	Vitamin D receptor	VDR	P11473	CHEMBL1977	Nuclear receptor	0	0 / 1聽聽聽聽聽
2.csv	Cytochrome P450 19A1	CYP19A1	P11511	CHEMBL1978	Cytochrome P450	0	0 / 3聽聽聽聽聽
2.csv	Bile acid receptor FXR	NR1H4	Q96RI1	CHEMBL2047	Nuclear receptor	0	0 / 7聽聽聽聽聽
2.csv	Dual specificity phosphatase Cdc25A	CDC25A	P30304	CHEMBL3775	Phosphatase	0	0 / 2聽聽聽聽聽
2.csv	Glucose-6-phosphate 1-dehydrogenase	G6PD	P11413	CHEMBL5347	Enzyme	0	0 / 5聽聽聽聽聽
2.csv	G-protein coupled bile acid receptor 1	GPBAR1	Q8TDU6	CHEMBL5409	Family A G protein-coupled receptor	0	0 / 13聽聽聽聽聽
2.csv	Aldo-keto reductase family 1 member B10	AKR1B10	O60218	CHEMBL5983	Enzyme	0	0 / 1聽聽聽聽聽
2.csv	DNA polymerase beta (by homology)	POLB	P06746	CHEMBL2392	Enzyme	0	0 / 1聽聽聽聽聽
2.csv	11-beta-hydroxysteroid dehydrogenase 2	HSD11B2	P80365	CHEMBL3746	Enzyme	0	0 / 1聽聽聽聽聽
2.csv	Hydroxyacid oxidase 1	HAO1	Q9UJM8	CHEMBL4229	Enzyme	0	0 / 1聽聽聽聽聽
2.csv	Matrix metalloproteinase 2	MMP2	P08253	CHEMBL333	Protease	0	3 / 0聽聽聽聽聽
2.csv	Matrix metalloproteinase 8	MMP8	P22894	CHEMBL4588	Protease	0	1 / 0聽聽聽聽聽
2.csv	Hydroxycarboxylic acid receptor 2	HCAR2	Q8TDS4	CHEMBL3785	Family A G protein-coupled receptor	0	1 / 0聽聽聽聽聽
2.csv	D-amino-acid oxidase	DAO	P14920	CHEMBL5485	Enzyme	0	1 / 0聽聽聽聽聽
2.csv	Carbonic anhydrase II	CA2	P00918	CHEMBL205	Lyase	0	8 / 0聽聽聽聽聽
2.csv	Carbonic anhydrase VI	CA6	P23280	CHEMBL3025	Lyase	0	3 / 0聽聽聽聽聽
2.csv	Carbonic anhydrase XII	CA12	O43570	CHEMBL3242	Lyase	0	7 / 0聽聽聽聽聽
2.csv	Carbonic anhydrase VII	CA7	P43166	CHEMBL2326	Lyase	0	2 / 0聽聽聽聽聽
2.csv	Carbonic anhydrase III	CA3	P07451	CHEMBL2885	Lyase	0	1 / 0聽聽聽聽聽
2.csv	Carbonic anhydrase XIV	CA14	Q9ULX7	CHEMBL3510	Lyase	0	2 / 0聽聽聽聽聽
2.csv	Carbonic anhydrase IV	CA4	P22748	CHEMBL3729	Lyase	0	2 / 0聽聽聽聽聽
2.csv	Carbonic anhydrase VB	CA5B	Q9Y2D0	CHEMBL3969	Lyase	0	1 / 0聽聽聽聽聽
2.csv	Carbonic anhydrase VA	CA5A	P35218	CHEMBL4789	Lyase	0	1 / 0聽聽聽聽聽
2.csv	Carbonic anhydrase XIII (by homology)	CA13	Q8N1Q1	CHEMBL3912	Lyase	0	1 / 0聽聽聽聽聽
2.csv	Lysine-specific demethylase 4D-like	KDM4E	B2RXH2	CHEMBL1293226	Eraser	0	1 / 0聽聽聽聽聽
2.csv	Lysine-specific demethylase 6B	KDM6B	O15054	CHEMBL1938211	Eraser	0	1 / 0聽聽聽聽聽
2.csv	Aldose reductase	AKR1B1	P15121	CHEMBL1900	Enzyme	0	1 / 1聽聽聽聽聽
2.csv	Aminopeptidase B	RNPEP	Q9H4A4	CHEMBL2432	Protease	0	0 / 1聽聽聽聽聽
2.csv	UDP-glucuronosyltransferase 2B7	UGT2B7	P16662	CHEMBL4370	Enzyme	0	0 / 4聽聽聽聽聽
2.csv	Matrix metalloproteinase 9	MMP9	P14780	CHEMBL321	Protease	0	2 / 0聽聽聽聽聽
2.csv	Alpha-L-fucosidase I	FUCA1	P04066	CHEMBL4176	Enzyme	0	1 / 0聽聽聽聽聽
2.csv	Squalene synthetase (by homology)	FDFT1	P37268	CHEMBL3338	Enzyme	0	0 / 1聽聽聽聽聽
2.csv	Prostanoid EP2 receptor	PTGER2	P43116	CHEMBL1881	Family A G protein-coupled receptor	0	0 / 1聽聽聽聽聽
2.csv	Prostanoid FP receptor	PTGFR	P43088	CHEMBL1987	Family A G protein-coupled receptor	0	0 / 1聽聽聽聽聽
2.csv	Protein farnesyltransferase	FNTA FNTB	P49354 P49356	CHEMBL2094108	Enzyme	0	0 / 2聽聽聽聽聽
2.csv	Histone deacetylase 6	HDAC6	Q9UBN7	CHEMBL1865	Eraser	0	1 / 0聽聽聽聽聽
2.csv	Histone deacetylase 8	HDAC8	Q9BY41	CHEMBL3192	Eraser	0	1 / 0聽聽聽聽聽
2.csv	Corticosteroid binding globulin	SERPINA6	P08185	CHEMBL2421	Secreted protein	0	0 / 3聽聽聽聽聽
2.csv	Testis-specific androgen-binding protein	SHBG	P04278	CHEMBL3305	Secreted protein	0	0 / 9聽聽聽聽聽
2.csv	Estradiol 17-beta-dehydrogenase 3	HSD17B3	P37058	CHEMBL4234	Enzyme	0	0 / 10聽聽聽聽聽
2.csv	GABA-B receptor (by homology)	GABBR1	Q9UBS5	CHEMBL2064	Family C G protein-coupled receptor	0	0 / 1聽聽聽聽聽
2.csv	Niemann-Pick C1-like protein 1	NPC1L1	Q9UHC9	CHEMBL2027	Other membrane protein	0	0 / 2聽聽聽聽聽
2.csv	Betaine transporter	SLC6A12	P48065	CHEMBL3715	Electrochemical transporter	0	0 / 2聽聽聽聽聽
2.csv	Carnitine O-palmitoyltransferase 1, liver isoform (by homology)	CPT1A	P50416	CHEMBL1293194	Enzyme	0	0 / 2聽聽聽聽聽
2.csv	HMG-CoA reductase	HMGCR	P04035	CHEMBL402	Oxidoreductase	0	1 / 1聽聽聽聽聽
2.csv	Lysine-specific demethylase 2A	KDM2A	Q9Y2K7	CHEMBL1938210	Eraser	0	1 / 1聽聽聽聽聽
2.csv	Histone lysine demethylase PHF8	PHF8	Q9UPP1	CHEMBL1938212	Eraser	0	1 / 1聽聽聽聽聽
2.csv	Lysine-specific demethylase 5C	KDM5C	P41229	CHEMBL2163176	Eraser	0	1 / 1聽聽聽聽聽
2.csv	Glutamate carboxypeptidase II	FOLH1	Q04609	CHEMBL1892	Protease	0	2 / 1聽聽聽聽聽
20.csv	Nuclear factor NF-kappa-B p105 subunit	NFKB1	P19838	CHEMBL3251	Other cytosolic protein	0.276836	0 / 2聽聽聽聽聽
20.csv	Acetylcholinesterase	ACHE	P22303	CHEMBL220	Hydrolase	0.1846	0 / 3聽聽聽聽聽
20.csv	Carbonic anhydrase II	CA2	P00918	CHEMBL205	Lyase	0.0517133	0 / 2聽聽聽聽聽
20.csv	Carbonic anhydrase VII	CA7	P43166	CHEMBL2326	Lyase	0.0517133	0 / 12聽聽聽聽聽
20.csv	Carbonic anhydrase I	CA1	P00915	CHEMBL261	Lyase	0.0517133	0 / 8聽聽聽聽聽
20.csv	Carbonic anhydrase III	CA3	P07451	CHEMBL2885	Lyase	0.0517133	0 / 3聽聽聽聽聽
20.csv	Carbonic anhydrase VI	CA6	P23280	CHEMBL3025	Lyase	0.0517133	0 / 6聽聽聽聽聽
20.csv	Carbonic anhydrase XII	CA12	O43570	CHEMBL3242	Lyase	0.0517133	0 / 26聽聽聽聽聽
20.csv	Carbonic anhydrase XIV	CA14	Q9ULX7	CHEMBL3510	Lyase	0.0517133	0 / 9聽聽聽聽聽
20.csv	Carbonic anhydrase IX	CA9	Q16790	CHEMBL3594	Lyase	0.0517133	0 / 27聽聽聽聽聽
20.csv	Carbonic anhydrase IV	CA4	P22748	CHEMBL3729	Lyase	0.0517133	0 / 4聽聽聽聽聽
20.csv	Carbonic anhydrase XIII (by homology)	CA13	Q8N1Q1	CHEMBL3912	Lyase	0.0517133	0 / 13聽聽聽聽聽
20.csv	Carbonic anhydrase VB	CA5B	Q9Y2D0	CHEMBL3969	Lyase	0.0517133	0 / 7聽聽聽聽聽
20.csv	Carbonic anhydrase VA	CA5A	P35218	CHEMBL4789	Lyase	0.0517133	0 / 6聽聽聽聽聽
20.csv	Monoamine oxidase A	MAOA	P21397	CHEMBL1951	Oxidoreductase	0.0414703	0 / 12聽聽聽聽聽
20.csv	Estrogen receptor alpha	ESR1	P03372	CHEMBL206	Nuclear receptor	0.0312266	0 / 17聽聽聽聽聽
20.csv	Estrogen receptor beta	ESR2	Q92731	CHEMBL242	Nuclear receptor	0.0312266	0 / 24聽聽聽聽聽
20.csv	Cytochrome P450 1A2	CYP1A2	P05177	CHEMBL3356	Cytochrome P450	0.0312266	0 / 6聽聽聽聽聽
20.csv	Cytochrome P450 1B1	CYP1B1	Q16678	CHEMBL4878	Cytochrome P450	0.0312266	0 / 3聽聽聽聽聽
20.csv	Quinone reductase 1	NQO1	P15559	CHEMBL3623	Enzyme	0.0312266	0 / 1聽聽聽聽聽
20.csv	D-amino-acid oxidase	DAO	P14920	CHEMBL5485	Enzyme	0	0 / 1聽聽聽聽聽
20.csv	Serotonin 2c (5-HT2c) receptor	HTR2C	P28335	CHEMBL225	Family A G protein-coupled receptor	0	0 / 1聽聽聽聽聽
20.csv	Adenosine A2a receptor	ADORA2A	P29274	CHEMBL251	Family A G protein-coupled receptor	0	0 / 1聽聽聽聽聽
20.csv	Xanthine dehydrogenase	XDH	P47989	CHEMBL1929	Oxidoreductase	0	0 / 1聽聽聽聽聽
20.csv	Arachidonate 5-lipoxygenase	ALOX5	P09917	CHEMBL215	Oxidoreductase	0	0 / 1聽聽聽聽聽
20.csv	Carbonyl reductase [NADPH] 1	CBR1	P16152	CHEMBL5586	Enzyme	0	0 / 1聽聽聽聽聽
20.csv	Epidermal growth factor receptor erbB1	EGFR	P00533	CHEMBL203	Kinase	0	0 / 2聽聽聽聽聽
20.csv	G-protein coupled receptor 35	GPR35	Q9HC97	CHEMBL1293267	Family A G protein-coupled receptor	0	0 / 1聽聽聽聽聽
20.csv	Receptor protein-tyrosine kinase erbB-2	ERBB2	P04626	CHEMBL1824	Kinase	0	0 / 1聽聽聽聽聽
20.csv	Aldose reductase	AKR1B1	P15121	CHEMBL1900	Enzyme	0	0 / 1聽聽聽聽聽
20.csv	Cyclin-dependent kinase 4/cyclin D1	CCND1 CDK4	P24385 P11802	CHEMBL1907601	Kinase	0	0 / 1聽聽聽聽聽
20.csv	Platelet-derived growth factor receptor beta	PDGFRB	P09619	CHEMBL1913	Kinase	0	0 / 1聽聽聽聽聽
20.csv	Vascular endothelial growth factor receptor 3	FLT4	P35916	CHEMBL1955	Kinase	0	0 / 1聽聽聽聽聽
20.csv	Insulin-like growth factor I receptor	IGF1R	P08069	CHEMBL1957	Kinase	0	0 / 1聽聽聽聽聽
20.csv	Insulin receptor	INSR	P06213	CHEMBL1981	Kinase	0	0 / 1聽聽聽聽聽
20.csv	Cyclin-dependent kinase 2/cyclin A	CDK2 CCNA1 CCNA2	P24941 P78396 P20248	CHEMBL2094128	Other cytosolic protein	0	0 / 1聽聽聽聽聽
20.csv	Serine/threonine-protein kinase Aurora-B	AURKB	Q96GD4	CHEMBL2185	Kinase	0	0 / 1聽聽聽聽聽
20.csv	Glycogen synthase kinase-3 beta	GSK3B	P49841	CHEMBL262	Kinase	0	0 / 1聽聽聽聽聽
20.csv	Tyrosine-protein kinase SRC	SRC	P12931	CHEMBL267	Kinase	0	0 / 1聽聽聽聽聽
20.csv	Focal adhesion kinase 1	PTK2	Q05397	CHEMBL2695	Kinase	0	0 / 1聽聽聽聽聽
20.csv	Vascular endothelial growth factor receptor 2	KDR	P35968	CHEMBL279	Kinase	0	0 / 1聽聽聽聽聽
20.csv	Serine/threonine-protein kinase PLK1	PLK1	P53350	CHEMBL3024	Kinase	0	0 / 1聽聽聽聽聽
20.csv	Casein kinase II alpha	CSNK2A1	P68400	CHEMBL3629	Kinase	0	0 / 1聽聽聽聽聽
20.csv	Hepatocyte growth factor receptor	MET	P08581	CHEMBL3717	Kinase	0	0 / 1聽聽聽聽聽
20.csv	Serine/threonine-protein kinase PLK4	PLK4	O00444	CHEMBL3788	Kinase	0	0 / 1聽聽聽聽聽
20.csv	Tyrosine-protein kinase TIE-2	TEK	Q02763	CHEMBL4128	Kinase	0	0 / 1聽聽聽聽聽
20.csv	Serine/threonine-protein kinase AKT	AKT1	P31749	CHEMBL4282	Kinase	0	0 / 1聽聽聽聽聽
20.csv	Serine/threonine-protein kinase Aurora-A	AURKA	O14965	CHEMBL4722	Kinase	0	0 / 1聽聽聽聽聽
20.csv	Beta-secretase 1	BACE1	P56817	CHEMBL4822	Protease	0	0 / 2聽聽聽聽聽
20.csv	Mitogen-activated protein kinase kinase kinase 8	MAP3K8	P41279	CHEMBL4899	Kinase	0	0 / 1聽聽聽聽聽
20.csv	Serine/threonine-protein kinase B-raf	BRAF	P15056	CHEMBL5145	Kinase	0	0 / 1聽聽聽聽聽
20.csv	Ephrin receptor	EPHB4	P54760	CHEMBL5147	Kinase	0	0 / 1聽聽聽聽聽
20.csv	Heat shock 70 kDa protein 1	HSPA1A	P0DMV8	CHEMBL5460	Other cytosolic protein	0	0 / 1聽聽聽聽聽
20.csv	NUAK family SNF1-like kinase 1	NUAK1	O60285	CHEMBL5784	Kinase	0	0 / 1聽聽聽聽聽
20.csv	Squalene monooxygenase (by homology)	SQLE	Q14534	CHEMBL3592	Enzyme	0	0 / 1聽聽聽聽聽
20.csv	Tyrosine-protein kinase FGR (by homology)	FGR	P09769	CHEMBL4454	Kinase	0	0 / 1聽聽聽聽聽
20.csv	Tyrosine-protein kinase Lyn (by homology)	LYN	P07948	CHEMBL3905	Kinase	0	0 / 1聽聽聽聽聽
20.csv	Glutathione reductase	GSR	P00390	CHEMBL2755	Oxidoreductase	0	0 / 1聽聽聽聽聽
20.csv	Estradiol 17-beta-dehydrogenase 3	HSD17B3	P37058	CHEMBL4234	Enzyme	0	0 / 4聽聽聽聽聽
20.csv	Voltage-gated potassium channel subunit Kv1.5	KCNA5	P22460	CHEMBL4306	Voltage-gated ion channel	0	0 / 1聽聽聽聽聽
20.csv	Voltage-gated potassium channel subunit Kv1.3	KCNA3	P22001	CHEMBL4633	Voltage-gated ion channel	0	0 / 2聽聽聽聽聽
20.csv	Leukocyte elastase	ELANE	P08246	CHEMBL248	Protease	0	0 / 1聽聽聽聽聽
20.csv	Lysosomal protective protein	CTSA	P10619	CHEMBL6115	Protease	0	0 / 1聽聽聽聽聽
20.csv	Dopamine D4 receptor	DRD4	P21917	CHEMBL219	Family A G protein-coupled receptor	0	0 / 2聽聽聽聽聽
20.csv	Monoamine oxidase B	MAOB	P27338	CHEMBL2039	Oxidoreductase	0	0 / 4聽聽聽聽聽
20.csv	Troponin, cardiac muscle	TNNC1 TNNT2 TNNI3	P63316 P45379 P19429	CHEMBL2095202	Unclassified protein	0	0 / 1聽聽聽聽聽
20.csv	G-protein coupled receptor 55	GPR55	Q9Y2T6	CHEMBL1075322	Family A G protein-coupled receptor	0	0 / 2聽聽聽聽聽
20.csv	Steroid 5-alpha-reductase 1	SRD5A1	P18405	CHEMBL1787	Oxidoreductase	0	0 / 2聽聽聽聽聽
20.csv	Cytochrome P450 1A1	CYP1A1	P04798	CHEMBL2231	Cytochrome P450	0	0 / 1聽聽聽聽聽
20.csv	Cannabinoid receptor 1 (by homology)	CNR1	P21554	CHEMBL218	Family A G protein-coupled receptor	0	0 / 1聽聽聽聽聽
20.csv	Aldo-keto-reductase family 1 member C3	AKR1C3	P42330	CHEMBL4681	Enzyme	0	0 / 1聽聽聽聽聽
20.csv	Exportin-1	XPO1	O14980	CHEMBL5661	Unclassified protein	0	0 / 1聽聽聽聽聽
20.csv	Aldo-keto reductase family 1 member C1	AKR1C1	Q04828	CHEMBL5905	Enzyme	0	0 / 1聽聽聽聽聽
20.csv	Cyclooxygenase-2	PTGS2	P35354	CHEMBL230	Oxidoreductase	0	0 / 1聽聽聽聽聽
21.csv	Carbonic anhydrase VI	CA6	P23280	CHEMBL3025	Lyase	0.0414703	0 / 11聽聽聽聽聽
21.csv	Carbonic anhydrase XII	CA12	O43570	CHEMBL3242	Lyase	0.0414703	0 / 32聽聽聽聽聽
21.csv	Carbonic anhydrase XIV	CA14	Q9ULX7	CHEMBL3510	Lyase	0.0414703	0 / 20聽聽聽聽聽
21.csv	Carbonic anhydrase IX	CA9	Q16790	CHEMBL3594	Lyase	0.0414703	0 / 39聽聽聽聽聽
21.csv	Carbonic anhydrase IV	CA4	P22748	CHEMBL3729	Lyase	0.0414703	0 / 10聽聽聽聽聽
21.csv	Carbonic anhydrase XIII (by homology)	CA13	Q8N1Q1	CHEMBL3912	Lyase	0.0414703	0 / 22聽聽聽聽聽
21.csv	Carbonic anhydrase VB	CA5B	Q9Y2D0	CHEMBL3969	Lyase	0.0414703	0 / 13聽聽聽聽聽
21.csv	Carbonic anhydrase VA	CA5A	P35218	CHEMBL4789	Lyase	0.0414703	0 / 13聽聽聽聽聽
21.csv	Monoamine oxidase B	MAOB	P27338	CHEMBL2039	Oxidoreductase	0.0312266	0 / 95聽聽聽聽聽
21.csv	Estradiol 17-beta-dehydrogenase 3	HSD17B3	P37058	CHEMBL4234	Enzyme	0.0312266	0 / 14聽聽聽聽聽
21.csv	G-protein coupled receptor 55	GPR55	Q9Y2T6	CHEMBL1075322	Family A G protein-coupled receptor	0	0 / 11聽聽聽聽聽
21.csv	Estrogen receptor alpha	ESR1	P03372	CHEMBL206	Nuclear receptor	0	0 / 32聽聽聽聽聽
21.csv	Estrogen receptor beta	ESR2	Q92731	CHEMBL242	Nuclear receptor	0	0 / 43聽聽聽聽聽
21.csv	Monoamine oxidase A	MAOA	P21397	CHEMBL1951	Oxidoreductase	0	0 / 30聽聽聽聽聽
21.csv	Carbonic anhydrase VII	CA7	P43166	CHEMBL2326	Lyase	0	0 / 15聽聽聽聽聽
21.csv	Carbonic anhydrase III	CA3	P07451	CHEMBL2885	Lyase	0	0 / 8聽聽聽聽聽
21.csv	Cytochrome P450 1A2	CYP1A2	P05177	CHEMBL3356	Cytochrome P450	0	0 / 4聽聽聽聽聽
21.csv	Cytochrome P450 1B1	CYP1B1	Q16678	CHEMBL4878	Cytochrome P450	0	0 / 2聽聽聽聽聽
21.csv	Carbonic anhydrase I	CA1	P00915	CHEMBL261	Lyase	0	0 / 16聽聽聽聽聽
21.csv	Carbonic anhydrase II	CA2	P00918	CHEMBL205	Lyase	0	0 / 10聽聽聽聽聽
21.csv	Androgen Receptor	AR	P10275	CHEMBL1871	Nuclear receptor	0	0 / 2聽聽聽聽聽
21.csv	Serotonin 2c (5-HT2c) receptor	HTR2C	P28335	CHEMBL225	Family A G protein-coupled receptor	0	0 / 1聽聽聽聽聽
21.csv	Adenosine A2a receptor	ADORA2A	P29274	CHEMBL251	Family A G protein-coupled receptor	0	0 / 1聽聽聽聽聽
21.csv	Acetylcholinesterase	ACHE	P22303	CHEMBL220	Hydrolase	0	0 / 14聽聽聽聽聽
21.csv	Macrophage migration inhibitory factor	MIF	P14174	CHEMBL2085	Enzyme	0	0 / 6聽聽聽聽聽
21.csv	Butyrylcholinesterase	BCHE	P06276	CHEMBL1914	Hydrolase	0	0 / 4聽聽聽聽聽
21.csv	Cannabinoid receptor 1 (by homology)	CNR1	P21554	CHEMBL218	Family A G protein-coupled receptor	0	0 / 11聽聽聽聽聽
21.csv	Cannabinoid receptor 2	CNR2	P34972	CHEMBL253	Family A G protein-coupled receptor	0	0 / 16聽聽聽聽聽
21.csv	Aldose reductase (by homology)	AKR1B1	P15121	CHEMBL1900	Enzyme	0	0 / 14聽聽聽聽聽
21.csv	Aldehyde dehydrogenase	ALDH2	P05091	CHEMBL1935	Oxidoreductase	0	0 / 1聽聽聽聽聽
21.csv	Serine/threonine-protein kinase/endoribonuclease IRE1	ERN1	O75460	CHEMBL1163101	Enzyme	0	0 / 1聽聽聽聽聽
21.csv	Monocarboxylate transporter 4	SLC16A3	O15427	CHEMBL2073663	Electrochemical transporter	0	0 / 5聽聽聽聽聽
21.csv	Serotonin 2b (5-HT2b) receptor	HTR2B	P41595	CHEMBL1833	Family A G protein-coupled receptor	0	0 / 1聽聽聽聽聽
21.csv	D-amino-acid oxidase	DAO	P14920	CHEMBL5485	Enzyme	0	0 / 1聽聽聽聽聽
21.csv	Dopamine D4 receptor	DRD4	P21917	CHEMBL219	Family A G protein-coupled receptor	0	0 / 2聽聽聽聽聽
21.csv	Quinone reductase 1	NQO1	P15559	CHEMBL3623	Enzyme	0	0 / 7聽聽聽聽聽
21.csv	Steroid 5-alpha-reductase 1	SRD5A1	P18405	CHEMBL1787	Oxidoreductase	0	0 / 1聽聽聽聽聽
21.csv	11-beta-hydroxysteroid dehydrogenase 1	HSD11B1	P28845	CHEMBL4235	Enzyme	0	0 / 4聽聽聽聽聽
21.csv	Toll-like receptor (TLR7/TLR9)	TLR9	Q9NR96	CHEMBL5804	Toll-like and Il-1 receptors	0	0 / 1聽聽聽聽聽
21.csv	Cytochrome P450 19A1	CYP19A1	P11511	CHEMBL1978	Cytochrome P450	0	0 / 4聽聽聽聽聽
21.csv	Epidermal growth factor receptor erbB1	EGFR	P00533	CHEMBL203	Kinase	0	0 / 2聽聽聽聽聽
21.csv	Xanthine dehydrogenase	XDH	P47989	CHEMBL1929	Oxidoreductase	0	0 / 1聽聽聽聽聽
21.csv	Testis-specific androgen-binding protein	SHBG	P04278	CHEMBL3305	Secreted protein	0	0 / 1聽聽聽聽聽
21.csv	Tankyrase-1	TNKS	O95271	CHEMBL6164	Enzyme	0	0 / 3聽聽聽聽聽
21.csv	Tyrosine-protein kinase FYN	FYN	P06241	CHEMBL1841	Kinase	0	0 / 1聽聽聽聽聽
21.csv	Tyrosine-protein kinase LCK	LCK	P06239	CHEMBL258	Kinase	0	0 / 2聽聽聽聽聽
21.csv	Serine/threonine-protein kinase PIM1	PIM1	P11309	CHEMBL2147	Kinase	0	0 / 2聽聽聽聽聽
21.csv	Serine/threonine-protein kinase Aurora-B	AURKB	Q96GD4	CHEMBL2185	Kinase	0	0 / 3聽聽聽聽聽
21.csv	G protein-coupled receptor kinase 6	GRK6	P43250	CHEMBL6144	Kinase	0	0 / 1聽聽聽聽聽
21.csv	Adenosine A3 receptor	ADORA3	P0DMS8	CHEMBL256	Family A G protein-coupled receptor	0	0 / 1聽聽聽聽聽
21.csv	Adenosine A1 receptor (by homology)	ADORA1	P30542	CHEMBL226	Family A G protein-coupled receptor	0	0 / 1聽聽聽聽聽
21.csv	Nuclear factor NF-kappa-B p105 subunit	NFKB1	P19838	CHEMBL3251	Other cytosolic protein	0	0 / 2聽聽聽聽聽
21.csv	G protein-coupled receptor 44	PTGDR2	Q9Y5Y4	CHEMBL5071	Family A G protein-coupled receptor	0	0 / 1聽聽聽聽聽
21.csv	Prostanoid EP1 receptor	PTGER1	P34995	CHEMBL1811	Family A G protein-coupled receptor	0	0 / 1聽聽聽聽聽
21.csv	Prostanoid EP2 receptor	PTGER2	P43116	CHEMBL1881	Family A G protein-coupled receptor	0	0 / 1聽聽聽聽聽
21.csv	Steryl-sulfatase	STS	P08842	CHEMBL3559	Enzyme	0	0 / 3聽聽聽聽聽
21.csv	Prostanoid EP3 receptor	PTGER3	P43115	CHEMBL3710	Family A G protein-coupled receptor	0	0 / 1聽聽聽聽聽
21.csv	Prostanoid DP receptor	PTGDR	Q13258	CHEMBL4427	Family A G protein-coupled receptor	0	0 / 1聽聽聽聽聽
21.csv	Arachidonate 5-lipoxygenase	ALOX5	P09917	CHEMBL215	Oxidoreductase	0	0 / 1聽聽聽聽聽
21.csv	Thrombin	F2	P00734	CHEMBL204	Protease	0	0 / 1聽聽聽聽聽
21.csv	Heat shock protein HSP 90-alpha	HSP90AA1	P07900	CHEMBL3880	Other cytosolic protein	0	0 / 1聽聽聽聽聽
21.csv	Thromboxane A2 receptor	TBXA2R	P21731	CHEMBL2069	Family A G protein-coupled receptor	0	0 / 2聽聽聽聽聽
21.csv	Insulin-like growth factor I receptor	IGF1R	P08069	CHEMBL1957	Kinase	0	0 / 2聽聽聽聽聽
21.csv	Vascular endothelial growth factor receptor 2	KDR	P35968	CHEMBL279	Kinase	0	0 / 2聽聽聽聽聽
21.csv	Serine/threonine-protein kinase PLK1	PLK1	P53350	CHEMBL3024	Kinase	0	0 / 2聽聽聽聽聽
21.csv	Hepatocyte growth factor receptor	MET	P08581	CHEMBL3717	Kinase	0	0 / 2聽聽聽聽聽
21.csv	ALK tyrosine kinase receptor	ALK	Q9UM73	CHEMBL4247	Kinase	0	0 / 1聽聽聽聽聽
21.csv	Tyrosine-protein kinase receptor UFO	AXL	P30530	CHEMBL4895	Kinase	0	0 / 1聽聽聽聽聽
21.csv	G-protein coupled receptor 35	GPR35	Q9HC97	CHEMBL1293267	Family A G protein-coupled receptor	0	0 / 1聽聽聽聽聽
21.csv	Receptor protein-tyrosine kinase erbB-2	ERBB2	P04626	CHEMBL1824	Kinase	0	0 / 1聽聽聽聽聽
21.csv	Cyclin-dependent kinase 4/cyclin D1	CCND1 CDK4	P24385 P11802	CHEMBL1907601	Kinase	0	0 / 1聽聽聽聽聽
21.csv	Platelet-derived growth factor receptor beta	PDGFRB	P09619	CHEMBL1913	Kinase	0	0 / 1聽聽聽聽聽
21.csv	Vascular endothelial growth factor receptor 3	FLT4	P35916	CHEMBL1955	Kinase	0	0 / 1聽聽聽聽聽
21.csv	Insulin receptor	INSR	P06213	CHEMBL1981	Kinase	0	0 / 1聽聽聽聽聽
21.csv	Cyclin-dependent kinase 2/cyclin A	CDK2 CCNA1 CCNA2	P24941 P78396 P20248	CHEMBL2094128	Other cytosolic protein	0	0 / 1聽聽聽聽聽
21.csv	Glycogen synthase kinase-3 beta	GSK3B	P49841	CHEMBL262	Kinase	0	0 / 1聽聽聽聽聽
21.csv	Tyrosine-protein kinase SRC	SRC	P12931	CHEMBL267	Kinase	0	0 / 1聽聽聽聽聽
21.csv	Focal adhesion kinase 1	PTK2	Q05397	CHEMBL2695	Kinase	0	0 / 1聽聽聽聽聽
21.csv	Casein kinase II alpha	CSNK2A1	P68400	CHEMBL3629	Kinase	0	0 / 1聽聽聽聽聽
21.csv	Serine/threonine-protein kinase PLK4	PLK4	O00444	CHEMBL3788	Kinase	0	0 / 1聽聽聽聽聽
21.csv	Tyrosine-protein kinase TIE-2	TEK	Q02763	CHEMBL4128	Kinase	0	0 / 1聽聽聽聽聽
21.csv	Serine/threonine-protein kinase AKT	AKT1	P31749	CHEMBL4282	Kinase	0	0 / 1聽聽聽聽聽
21.csv	Serine/threonine-protein kinase Aurora-A	AURKA	O14965	CHEMBL4722	Kinase	0	0 / 1聽聽聽聽聽
21.csv	Beta-secretase 1	BACE1	P56817	CHEMBL4822	Protease	0	0 / 1聽聽聽聽聽
21.csv	Mitogen-activated protein kinase kinase kinase 8	MAP3K8	P41279	CHEMBL4899	Kinase	0	0 / 1聽聽聽聽聽
21.csv	Serine/threonine-protein kinase B-raf	BRAF	P15056	CHEMBL5145	Kinase	0	0 / 1聽聽聽聽聽
21.csv	Ephrin receptor	EPHB4	P54760	CHEMBL5147	Kinase	0	0 / 1聽聽聽聽聽
21.csv	Heat shock 70 kDa protein 1	HSPA1A	P0DMV8	CHEMBL5460	Other cytosolic protein	0	0 / 1聽聽聽聽聽
21.csv	NUAK family SNF1-like kinase 1	NUAK1	O60285	CHEMBL5784	Kinase	0	0 / 1聽聽聽聽聽
21.csv	Squalene monooxygenase (by homology)	SQLE	Q14534	CHEMBL3592	Enzyme	0	0 / 1聽聽聽聽聽
21.csv	Tyrosine-protein kinase FGR (by homology)	FGR	P09769	CHEMBL4454	Kinase	0	0 / 1聽聽聽聽聽
21.csv	Tyrosine-protein kinase Lyn (by homology)	LYN	P07948	CHEMBL3905	Kinase	0	0 / 1聽聽聽聽聽
21.csv	Serotonin 2a (5-HT2a) receptor (by homology)	HTR2A	P28223	CHEMBL224	Family A G protein-coupled receptor	0	0 / 1聽聽聽聽聽
21.csv	Serum paraoxonase/arylesterase 1	PON1	P27169	CHEMBL3167	Enzyme	0	0 / 1聽聽聽聽聽
21.csv	Metabotropic glutamate receptor 5	GRM5	P41594	CHEMBL3227	Family C G protein-coupled receptor	0	0 / 1聽聽聽聽聽
21.csv	Protein-tyrosine phosphatase 1B	PTPN1	P18031	CHEMBL335	Phosphatase	0	0 / 1聽聽聽聽聽
21.csv	T-cell protein-tyrosine phosphatase	PTPN2	P17706	CHEMBL3807	Phosphatase	0	0 / 1聽聽聽聽聽
21.csv	Cytochrome P450 11B1	CYP11B1	P15538	CHEMBL1908	Cytochrome P450	0	0 / 1聽聽聽聽聽
21.csv	Cytochrome P450 11B2	CYP11B2	P19099	CHEMBL2722	Cytochrome P450	0	0 / 1聽聽聽聽聽
21.csv	Exportin-1	XPO1	O14980	CHEMBL5661	Unclassified protein	0	0 / 1聽聽聽聽聽
22.csv	Nuclear receptor ROR-gamma	RORC	P51449	CHEMBL1741186	Nuclear receptor	0.08057	0 / 9聽聽聽聽聽
22.csv	Niemann-Pick C1-like protein 1	NPC1L1	Q9UHC9	CHEMBL2027	Other membrane protein	0.08057	0 / 8聽聽聽聽聽
22.csv	Nuclear receptor ROR-alpha	RORA	P35398	CHEMBL5868	Nuclear receptor	0.08057	0 / 3聽聽聽聽聽
22.csv	Dipeptidyl peptidase IV	DPP4	P27487	CHEMBL284	Protease	0.08057	2 / 0聽聽聽聽聽
22.csv	Serotonin transporter (by homology)	SLC6A4	P31645	CHEMBL228	Electrochemical transporter	0.08057	0 / 2聽聽聽聽聽
22.csv	Prostanoid EP1 receptor	PTGER1	P34995	CHEMBL1811	Family A G protein-coupled receptor	0.0717872	0 / 8聽聽聽聽聽
22.csv	Prostanoid EP4 receptor	PTGER4	P35408	CHEMBL1836	Family A G protein-coupled receptor	0.0717872	0 / 6聽聽聽聽聽
22.csv	Prostanoid FP receptor	PTGFR	P43088	CHEMBL1987	Family A G protein-coupled receptor	0.0717872	0 / 11聽聽聽聽聽
22.csv	Prostanoid EP3 receptor	PTGER3	P43115	CHEMBL3710	Family A G protein-coupled receptor	0.0717872	0 / 3聽聽聽聽聽
22.csv	Prostanoid DP receptor	PTGDR	Q13258	CHEMBL4427	Family A G protein-coupled receptor	0.0717872	0 / 1聽聽聽聽聽
22.csv	LXR-alpha	NR1H3	Q13133	CHEMBL2808	Nuclear receptor	0.0717872	0 / 18聽聽聽聽聽
22.csv	Androgen Receptor (by homology)	AR	P10275	CHEMBL1871	Nuclear receptor	0.0717872	0 / 56聽聽聽聽聽
22.csv	Estrogen receptor alpha	ESR1	P03372	CHEMBL206	Nuclear receptor	0.0717872	0 / 35聽聽聽聽聽
22.csv	Peroxisome proliferator-activated receptor gamma	PPARG	P37231	CHEMBL235	Nuclear receptor	0.0717872	0 / 9聽聽聽聽聽
22.csv	Peroxisome proliferator-activated receptor alpha	PPARA	Q07869	CHEMBL239	Nuclear receptor	0.0717872	0 / 8聽聽聽聽聽
22.csv	Testis-specific androgen-binding protein	SHBG	P04278	CHEMBL3305	Secreted protein	0.0717872	0 / 30聽聽聽聽聽
22.csv	Peroxisome proliferator-activated receptor delta	PPARD	Q03181	CHEMBL3979	Nuclear receptor	0.0717872	0 / 6聽聽聽聽聽
22.csv	Cytidine deaminase (by homology)	CDA	P32320	CHEMBL4502	Enzyme	0.0717872	25 / 0聽聽聽聽聽
22.csv	Sterol regulatory element-binding protein 2	SREBF2	Q12772	CHEMBL1795166	Unclassified protein	0	0 / 1聽聽聽聽聽
22.csv	Cytochrome P450 17A1	CYP17A1	P05093	CHEMBL3522	Cytochrome P450	0	0 / 33聽聽聽聽聽
22.csv	HMG-CoA reductase	HMGCR	P04035	CHEMBL402	Oxidoreductase	0	0 / 4聽聽聽聽聽
22.csv	Cytochrome P450 51 (by homology)	CYP51A1	Q16850	CHEMBL3849	Cytochrome P450	0	0 / 2聽聽聽聽聽
22.csv	Nuclear receptor subfamily 1 group I member 3 (by homology)	NR1I3	Q14994	CHEMBL5503	Nuclear receptor	0	0 / 1聽聽聽聽聽
22.csv	Protein kinase C alpha	PRKCA	P17252	CHEMBL299	Kinase	0	0 / 1聽聽聽聽聽
22.csv	Glutamate carboxypeptidase II	FOLH1	Q04609	CHEMBL1892	Protease	0	15 / 0聽聽聽聽聽
22.csv	Prostanoid EP2 receptor (by homology)	PTGER2	P43116	CHEMBL1881	Family A G protein-coupled receptor	0	0 / 17聽聽聽聽聽
22.csv	Prostanoid IP receptor	PTGIR	P43119	CHEMBL1995	Family A G protein-coupled receptor	0	0 / 6聽聽聽聽聽
22.csv	Adenosine deaminase (by homology)	ADA	P00813	CHEMBL1910	Hydrolase	0	7 / 0聽聽聽聽聽
22.csv	Adenosine A2a receptor (by homology)	ADORA2A	P29274	CHEMBL251	Family A G protein-coupled receptor	0	16 / 0聽聽聽聽聽
22.csv	Adenosylhomocysteinase	AHCY	P23526	CHEMBL2664	Enzyme	0	43 / 0聽聽聽聽聽
22.csv	Adenosine A1 receptor (by homology)	ADORA1	P30542	CHEMBL226	Family A G protein-coupled receptor	0	19 / 0聽聽聽聽聽
22.csv	Leukotriene B4 receptor 1	LTB4R	Q15722	CHEMBL3911	Family A G protein-coupled receptor	0	0 / 3聽聽聽聽聽
22.csv	Thymidine kinase, cytosolic	TK1	P04183	CHEMBL2883	Transferase	0	10 / 0聽聽聽聽聽
22.csv	CDK9/cyclin T1	CDK9 CCNT1	P50750 O60563	CHEMBL2111389	Other cytosolic protein	0	1 / 0聽聽聽聽聽
22.csv	Casein kinase II alpha	CSNK2A1	P68400	CHEMBL3629	Kinase	0	2 / 0聽聽聽聽聽
22.csv	Alpha-L-fucosidase I	FUCA1	P04066	CHEMBL4176	Enzyme	0	22 / 0聽聽聽聽聽
22.csv	Vitamin D receptor	VDR	P11473	CHEMBL1977	Nuclear receptor	0	0 / 39聽聽聽聽聽
22.csv	Beta-glucocerebrosidase	GBA	P04062	CHEMBL2179	Enzyme	0	11 / 0聽聽聽聽聽
22.csv	Hydroxycarboxylic acid receptor 2	HCAR2	Q8TDS4	CHEMBL3785	Family A G protein-coupled receptor	0	23 / 0聽聽聽聽聽
22.csv	Sphingosine kinase 2	SPHK2	Q9NRA0	CHEMBL3023	Enzyme	0	0 / 1聽聽聽聽聽
22.csv	Sphingosine kinase 1	SPHK1	Q9NYA1	CHEMBL4394	Enzyme	0	0 / 2聽聽聽聽聽
22.csv	Thymidylate synthase (by homology)	TYMS	P04818	CHEMBL1952	Transferase	0	2 / 0聽聽聽聽聽
22.csv	Solute carrier family 22 member 6 (by homology)	SLC22A6	Q4U2R8	CHEMBL1641347	Electrochemical transporter	0	0 / 1聽聽聽聽聽
22.csv	Adenosine kinase	ADK	P55263	CHEMBL3589	Enzyme	0	20 / 0聽聽聽聽聽
22.csv	Heat shock protein HSP 90-alpha	HSP90AA1	P07900	CHEMBL3880	Other cytosolic protein	0	1 / 0聽聽聽聽聽
22.csv	Aldo-keto-reductase family 1 member C3	AKR1C3	P42330	CHEMBL4681	Enzyme	0	7 / 0聽聽聽聽聽
22.csv	Aldo-keto reductase family 1 member C2	AKR1C2	P52895	CHEMBL5847	Enzyme	0	6 / 0聽聽聽聽聽
22.csv	Lysine-specific demethylase 4C	KDM4C	Q9H3R0	CHEMBL6175	Eraser	0	4 / 0聽聽聽聽聽
22.csv	Protein-tyrosine phosphatase 1B	PTPN1	P18031	CHEMBL335	Phosphatase	0	6 / 37聽聽聽聽聽
22.csv	Fructose-1,6-bisphosphatase	FBP1	P09467	CHEMBL3975	Enzyme	0	17 / 0聽聽聽聽聽
22.csv	Epoxide hydrolase 1 (by homology)	EPHX1	P07099	CHEMBL1968	Protease	0	2 / 0聽聽聽聽聽
22.csv	Carbonic anhydrase II	CA2	P00918	CHEMBL205	Lyase	0	19 / 0聽聽聽聽聽
22.csv	Muscle glycogen phosphorylase	PYGM	P11217	CHEMBL3526	Enzyme	0	1 / 0聽聽聽聽聽
22.csv	Adenosylhomocysteinase 2	AHCYL1	O43865	CHEMBL3751646	Enzyme	0	3 / 0聽聽聽聽聽
22.csv	Carbonic anhydrase I	CA1	P00915	CHEMBL261	Lyase	0	19 / 0聽聽聽聽聽
22.csv	D-amino-acid oxidase	DAO	P14920	CHEMBL5485	Enzyme	0	11 / 0聽聽聽聽聽
22.csv	Cytochrome P450 19A1	CYP19A1	P11511	CHEMBL1978	Cytochrome P450	0	1 / 57聽聽聽聽聽
22.csv	Lysine-specific demethylase 4D-like	KDM4E	B2RXH2	CHEMBL1293226	Eraser	0	4 / 0聽聽聽聽聽
22.csv	Alkaline phosphatase, tissue-nonspecific isozyme	ALPL	P05186	CHEMBL5979	Enzyme	0	4 / 0聽聽聽聽聽
22.csv	Protein farnesyltransferase	FNTA FNTB	P49354 P49356	CHEMBL2094108	Enzyme	0	0 / 5聽聽聽聽聽
22.csv	Carbonic anhydrase XII	CA12	O43570	CHEMBL3242	Lyase	0	10 / 0聽聽聽聽聽
22.csv	Carbonic anhydrase IX	CA9	Q16790	CHEMBL3594	Lyase	0	11 / 0聽聽聽聽聽
22.csv	Hydroxyacid oxidase 2 (by homology)	HAO2	Q9NYQ3	CHEMBL2169732	Enzyme	0	6 / 0聽聽聽聽聽
22.csv	Muscarinic acetylcholine receptor M2	CHRM2	P08172	CHEMBL211	Family A G protein-coupled receptor	0	0 / 1聽聽聽聽聽
22.csv	Acetylcholinesterase	ACHE	P22303	CHEMBL220	Hydrolase	0	0 / 1聽聽聽聽聽
22.csv	Norepinephrine transporter	SLC6A2	P23975	CHEMBL222	Electrochemical transporter	0	0 / 2聽聽聽聽聽
22.csv	Squalene monooxygenase	SQLE	Q14534	CHEMBL3592	Enzyme	0	0 / 4聽聽聽聽聽
22.csv	Cytochrome P450 2C19	CYP2C19	P33261	CHEMBL3622	Cytochrome P450	0	0 / 1聽聽聽聽聽
22.csv	Uracil nucleotide/cysteinyl leukotriene receptor	GPR17	Q13304	CHEMBL1075162	Family A G protein-coupled receptor	0	2 / 0聽聽聽聽聽
22.csv	Tyrosyl-DNA phosphodiesterase 1	TDP1	Q9NUW8	CHEMBL1075138	Enzyme	0	1 / 0聽聽聽聽聽
22.csv	Liver glycogen phosphorylase	PYGL	P06737	CHEMBL2568	Enzyme	0	9 / 0聽聽聽聽聽
22.csv	DNA-(apurinic or apyrimidinic site) lyase	APEX1	P27695	CHEMBL5619	Enzyme	0	2 / 0聽聽聽聽聽
22.csv	Butyrylcholinesterase	BCHE	P06276	CHEMBL1914	Hydrolase	0	0 / 1聽聽聽聽聽
22.csv	Glycine receptor subunit alpha-2	GLRA2	P23416	CHEMBL5871	Ligand-gated ion channel	0	1 / 0聽聽聽聽聽
22.csv	Bifunctional protein NCOAT	OGA	O60502	CHEMBL5921	Enzyme	0	5 / 0聽聽聽聽聽
22.csv	TNF-alpha	TNF	P01375	CHEMBL1825	Secreted protein	0	0 / 5聽聽聽聽聽
22.csv	11-beta-hydroxysteroid dehydrogenase 1	HSD11B1	P28845	CHEMBL4235	Enzyme	0	0 / 12聽聽聽聽聽
22.csv	Carboxypeptidase A1	CPA1	P15085	CHEMBL2088	Protease	0	6 / 0聽聽聽聽聽
22.csv	Poly [ADP-ribose] polymerase-1	PARP1	P09874	CHEMBL3105	Enzyme	0	2 / 0聽聽聽聽聽
22.csv	Heat shock 70 kDa protein 1	HSPA1A	P0DMV8	CHEMBL5460	Other cytosolic protein	0	3 / 0聽聽聽聽聽
22.csv	Lysine-specific demethylase 3A	KDM3A	Q9Y4C1	CHEMBL1938209	Eraser	0	1 / 0聽聽聽聽聽
22.csv	Lysine-specific demethylase 6B	KDM6B	O15054	CHEMBL1938211	Eraser	0	1 / 0聽聽聽聽聽
22.csv	Alpha-ketoglutarate-dependent dioxygenase FTO	FTO	Q9C0B1	CHEMBL2331065	Oxidoreductase	0	1 / 0聽聽聽聽聽
22.csv	Glutathione reductase	GSR	P00390	CHEMBL2755	Oxidoreductase	0	3 / 0聽聽聽聽聽
22.csv	Glutathione S-transferase Pi	GSTP1	P09211	CHEMBL3902	Enzyme	0	1 / 0聽聽聽聽聽
22.csv	Glutathione S-transferase Mu 2	GSTM2	P28161	CHEMBL4589	Enzyme	0	1 / 0聽聽聽聽聽
22.csv	Lysine-specific demethylase 4A	KDM4A	O75164	CHEMBL5896	Eraser	0	5 / 0聽聽聽聽聽
22.csv	Thrombin	F2	P00734	CHEMBL204	Protease	0	3 / 0聽聽聽聽聽
22.csv	Carbonic anhydrase VII	CA7	P43166	CHEMBL2326	Lyase	0	1 / 0聽聽聽聽聽
22.csv	Carbonic anhydrase VI	CA6	P23280	CHEMBL3025	Lyase	0	1 / 0聽聽聽聽聽
22.csv	Carbonic anhydrase XIV	CA14	Q9ULX7	CHEMBL3510	Lyase	0	3 / 0聽聽聽聽聽
22.csv	Carbonic anhydrase VB	CA5B	Q9Y2D0	CHEMBL3969	Lyase	0	1 / 0聽聽聽聽聽
22.csv	Carbonic anhydrase VA	CA5A	P35218	CHEMBL4789	Lyase	0	1 / 0聽聽聽聽聽
22.csv	Corticosteroid binding globulin	SERPINA6	P08185	CHEMBL2421	Secreted protein	0	0 / 11聽聽聽聽聽
22.csv	Carboxylesterase 2	CES2	O00748	CHEMBL3180	Enzyme	0	0 / 4聽聽聽聽聽
22.csv	Glucose-6-phosphate 1-dehydrogenase	G6PD	P11413	CHEMBL5347	Enzyme	0	0 / 2聽聽聽聽聽
22.csv	N-lysine methyltransferase SETD8	KMT5A	Q9NQR1	CHEMBL1795176	Writer	0	0 / 1聽聽聽聽聽
22.csv	Lysine-specific demethylase 2A	KDM2A	Q9Y2K7	CHEMBL1938210	Eraser	0	1 / 0聽聽聽聽聽
22.csv	Alpha-1a adrenergic receptor	ADRA1A	P35348	CHEMBL229	Family A G protein-coupled receptor	0	2 / 0聽聽聽聽聽
22.csv	DNA polymerase beta (by homology)	POLB	P06746	CHEMBL2392	Enzyme	0	0 / 5聽聽聽聽聽
23.csv	ATP-citrate synthase	ACLY	P53396	CHEMBL3720	Enzyme	0.291516	0 / 1聽聽聽聽聽
23.csv	Squalene synthetase (by homology)	FDFT1	P37268	CHEMBL3338	Enzyme	0.115731	0 / 1聽聽聽聽聽
23.csv	Neuronal acetylcholine receptor protein alpha-7 subunit (by homology)	CHRNA7	P36544	CHEMBL2492	Ligand-gated ion channel	0.0981627	0 / 2聽聽聽聽聽
23.csv	Egl nine homolog 1	EGLN1	Q9GZT9	CHEMBL5697	Oxidoreductase	0.0981627	0 / 2聽聽聽聽聽
23.csv	HMG-CoA reductase	HMGCR	P04035	CHEMBL402	Oxidoreductase	0.0893705	0 / 1聽聽聽聽聽
23.csv	Solute carrier family 22 member 6 (by homology)	SLC22A6	Q4U2R8	CHEMBL1641347	Electrochemical transporter	0.08057	0 / 2聽聽聽聽聽
23.csv	Protein farnesyltransferase	FNTA FNTB	P49354 P49356	CHEMBL2094108	Enzyme	0	0 / 5聽聽聽聽聽
23.csv	Excitatory amino acid transporter 3	SLC1A1	P43005	CHEMBL2721	Electrochemical transporter	0	0 / 3聽聽聽聽聽
23.csv	Prostanoid EP2 receptor	PTGER2	P43116	CHEMBL1881	Family A G protein-coupled receptor	0	0 / 1聽聽聽聽聽
23.csv	Prostanoid FP receptor	PTGFR	P43088	CHEMBL1987	Family A G protein-coupled receptor	0	0 / 1聽聽聽聽聽
23.csv	Niemann-Pick C1-like protein 1	NPC1L1	Q9UHC9	CHEMBL2027	Other membrane protein	0	0 / 2聽聽聽聽聽
23.csv	Hydroxyacid oxidase 1	HAO1	Q9UJM8	CHEMBL4229	Enzyme	0	0 / 1聽聽聽聽聽
23.csv	Lysine-specific demethylase 2A	KDM2A	Q9Y2K7	CHEMBL1938210	Eraser	0	0 / 1聽聽聽聽聽
23.csv	Histone lysine demethylase PHF8	PHF8	Q9UPP1	CHEMBL1938212	Eraser	0	0 / 1聽聽聽聽聽
23.csv	Lysine-specific demethylase 5C	KDM5C	P41229	CHEMBL2163176	Eraser	0	0 / 1聽聽聽聽聽
23.csv	Metabotropic glutamate receptor 3	GRM3	Q14832	CHEMBL2888	Family C G protein-coupled receptor	0	0 / 5聽聽聽聽聽
23.csv	Metabotropic glutamate receptor 2	GRM2	Q14416	CHEMBL5137	Family C G protein-coupled receptor	0	0 / 9聽聽聽聽聽
23.csv	Glutamate receptor ionotropic kainate 1	GRIK1	P39086	CHEMBL1918	Ligand-gated ion channel	0	0 / 5聽聽聽聽聽
23.csv	Glutamate receptor ionotropic, AMPA 1	GRIA1	P42261	CHEMBL2009	Ligand-gated ion channel	0	0 / 1聽聽聽聽聽
23.csv	Adenosine A3 receptor	ADORA3	P0DMS8	CHEMBL256	Family A G protein-coupled receptor	0	0 / 1聽聽聽聽聽
23.csv	Glutamate receptor ionotropic kainate 5	GRIK5	Q16478	CHEMBL2675	Ligand-gated ion channel	0	0 / 1聽聽聽聽聽
23.csv	Metabotropic glutamate receptor 4	GRM4	Q14833	CHEMBL2736	Family C G protein-coupled receptor	0	0 / 3聽聽聽聽聽
23.csv	Glutamate receptor ionotropic, AMPA 4	GRIA4	P48058	CHEMBL3190	Ligand-gated ion channel	0	0 / 1聽聽聽聽聽
23.csv	Metabotropic glutamate receptor 5	GRM5	P41594	CHEMBL3227	Family C G protein-coupled receptor	0	0 / 2聽聽聽聽聽
23.csv	Metabotropic glutamate receptor 8	GRM8	O00222	CHEMBL3228	Family C G protein-coupled receptor	0	0 / 3聽聽聽聽聽
23.csv	Glutamate receptor ionotropic kainate 2	GRIK2	Q13002	CHEMBL3683	Ligand-gated ion channel	0	0 / 4聽聽聽聽聽
23.csv	Glutamate receptor ionotropic kainate 3	GRIK3	Q13003	CHEMBL3684	Ligand-gated ion channel	0	0 / 1聽聽聽聽聽
23.csv	Metabotropic glutamate receptor 1	GRM1	Q13255	CHEMBL3772	Family C G protein-coupled receptor	0	0 / 2聽聽聽聽聽
23.csv	Metabotropic glutamate receptor 7	GRM7	Q14831	CHEMBL3777	Family C G protein-coupled receptor	0	0 / 1聽聽聽聽聽
23.csv	Glutamate receptor ionotropic, AMPA 2	GRIA2	P42262	CHEMBL4016	Ligand-gated ion channel	0	0 / 1聽聽聽聽聽
23.csv	Metabotropic glutamate receptor 6	GRM6	O15303	CHEMBL4573	Family C G protein-coupled receptor	0	0 / 3聽聽聽聽聽
23.csv	UDP-glucuronosyltransferase 2B7	UGT2B7	P16662	CHEMBL4370	Enzyme	0	0 / 4聽聽聽聽聽
23.csv	Glutamate carboxypeptidase II	FOLH1	Q04609	CHEMBL1892	Protease	0	0 / 7聽聽聽聽聽
23.csv	6-phosphogluconate dehydrogenase	PGD	P52209	CHEMBL3404	Enzyme	0	0 / 2聽聽聽聽聽
23.csv	Fatty acid binding protein adipocyte	FABP4	P15090	CHEMBL2083	Fatty acid binding protein family	0	0 / 1聽聽聽聽聽
23.csv	Peroxisome proliferator-activated receptor alpha	PPARA	Q07869	CHEMBL239	Nuclear receptor	0	0 / 3聽聽聽聽聽
23.csv	Fatty acid binding protein muscle	FABP3	P05413	CHEMBL3344	Fatty acid binding protein family	0	0 / 1聽聽聽聽聽
23.csv	Fatty acid binding protein epidermal	FABP5	Q01469	CHEMBL3674	Fatty acid binding protein family	0	0 / 1聽聽聽聽聽
23.csv	Peroxisome proliferator-activated receptor delta	PPARD	Q03181	CHEMBL3979	Nuclear receptor	0	0 / 2聽聽聽聽聽
23.csv	Free fatty acid receptor 1	FFAR1	O14842	CHEMBL4422	Family A G protein-coupled receptor	0	0 / 1聽聽聽聽聽
23.csv	Fatty acid binding protein intestinal	FABP2	P12104	CHEMBL4879	Fatty acid binding protein family	0	0 / 1聽聽聽聽聽
23.csv	Bile acid receptor FXR	NR1H4	Q96RI1	CHEMBL2047	Nuclear receptor	0	0 / 7聽聽聽聽聽
23.csv	Glucose-6-phosphate 1-dehydrogenase	G6PD	P11413	CHEMBL5347	Enzyme	0	0 / 5聽聽聽聽聽
23.csv	G-protein coupled bile acid receptor 1	GPBAR1	Q8TDU6	CHEMBL5409	Family A G protein-coupled receptor	0	0 / 13聽聽聽聽聽
23.csv	Carnitine O-palmitoyltransferase 1, liver isoform (by homology)	CPT1A	P50416	CHEMBL1293194	Enzyme	0	0 / 4聽聽聽聽聽
23.csv	11-beta-hydroxysteroid dehydrogenase 1	HSD11B1	P28845	CHEMBL4235	Enzyme	0	0 / 4聽聽聽聽聽
23.csv	11-beta-hydroxysteroid dehydrogenase 2	HSD11B2	P80365	CHEMBL3746	Enzyme	0	0 / 1聽聽聽聽聽
23.csv	Androgen Receptor	AR	P10275	CHEMBL1871	Nuclear receptor	0	0 / 4聽聽聽聽聽
23.csv	Vitamin D receptor	VDR	P11473	CHEMBL1977	Nuclear receptor	0	0 / 1聽聽聽聽聽
23.csv	Cytochrome P450 19A1	CYP19A1	P11511	CHEMBL1978	Cytochrome P450	0	0 / 3聽聽聽聽聽
23.csv	GABA A receptor alpha-2/beta-2/gamma-2	GABRA2 GABRB2 GABRG2	P47869 P47870 P18507	CHEMBL2111413	Ligand-gated ion channel	0	0 / 1聽聽聽聽聽
23.csv	Dual specificity phosphatase Cdc25A	CDC25A	P30304	CHEMBL3775	Phosphatase	0	0 / 2聽聽聽聽聽
23.csv	Aldo-keto reductase family 1 member B10	AKR1B10	O60218	CHEMBL5983	Enzyme	0	0 / 1聽聽聽聽聽
23.csv	DNA polymerase beta (by homology)	POLB	P06746	CHEMBL2392	Enzyme	0	0 / 1聽聽聽聽聽
23.csv	Histone deacetylase 3	HDAC3	O15379	CHEMBL1829	Eraser	0	0 / 1聽聽聽聽聽
23.csv	Excitatory amino acid transporter 2	SLC1A2	P43004	CHEMBL4973	Electrochemical transporter	0	0 / 2聽聽聽聽聽
23.csv	Carbonic anhydrase I	CA1	P00915	CHEMBL261	Lyase	0	0 / 1聽聽聽聽聽
23.csv	Carbonic anhydrase IX	CA9	Q16790	CHEMBL3594	Lyase	0	0 / 1聽聽聽聽聽
23.csv	Aminopeptidase B	RNPEP	Q9H4A4	CHEMBL2432	Protease	0	0 / 1聽聽聽聽聽
23.csv	Prostaglandin E synthase	PTGES	O14684	CHEMBL5658	Enzyme	0	0 / 1聽聽聽聽聽
23.csv	Corticosteroid binding globulin	SERPINA6	P08185	CHEMBL2421	Secreted protein	0	0 / 3聽聽聽聽聽
23.csv	Testis-specific androgen-binding protein	SHBG	P04278	CHEMBL3305	Secreted protein	0	0 / 9聽聽聽聽聽
23.csv	Estradiol 17-beta-dehydrogenase 3	HSD17B3	P37058	CHEMBL4234	Enzyme	0	0 / 10聽聽聽聽聽
23.csv	GABA-B receptor (by homology)	GABBR1	Q9UBS5	CHEMBL2064	Family C G protein-coupled receptor	0	0 / 1聽聽聽聽聽
24.csv	Carbonic anhydrase VII	CA7	P43166	CHEMBL2326	Lyase	1	28 / 25聽聽聽聽聽
24.csv	Carbonic anhydrase XII	CA12	O43570	CHEMBL3242	Lyase	1	53 / 47聽聽聽聽聽
24.csv	Carbonic anhydrase IX	CA9	Q16790	CHEMBL3594	Lyase	1	65 / 64聽聽聽聽聽
24.csv	Carbonic anhydrase XIII	CA13	Q8N1Q1	CHEMBL3912	Lyase	0.512184	6 / 27聽聽聽聽聽
24.csv	Carbonic anhydrase I	CA1	P00915	CHEMBL261	Lyase	0.143752	64 / 27聽聽聽聽聽
24.csv	Carbonic anhydrase XIV	CA14	Q9ULX7	CHEMBL3510	Lyase	0.113045	20 / 14聽聽聽聽聽
24.csv	Carbonic anhydrase IV	CA4	P22748	CHEMBL3729	Lyase	0.0619149	2 / 8聽聽聽聽聽
24.csv	Epidermal growth factor receptor erbB1	EGFR	P00533	CHEMBL203	Kinase	0.0517133	50 / 3聽聽聽聽聽
24.csv	Carbonic anhydrase VA	CA5A	P35218	CHEMBL4789	Lyase	0.0517133	6 / 8聽聽聽聽聽
24.csv	Xanthine dehydrogenase	XDH	P47989	CHEMBL1929	Oxidoreductase	0.0414703	3 / 2聽聽聽聽聽
24.csv	Carbonic anhydrase VI	CA6	P23280	CHEMBL3025	Lyase	0.0414703	1 / 8聽聽聽聽聽
24.csv	Carbonic anhydrase II	CA2	P00918	CHEMBL205	Lyase	0.0414703	83 / 9聽聽聽聽聽
24.csv	Steroid 5-alpha-reductase 1	SRD5A1	P18405	CHEMBL1787	Oxidoreductase	0.0414703	2 / 4聽聽聽聽聽
24.csv	Carbonyl reductase [NADPH] 1	CBR1	P16152	CHEMBL5586	Enzyme	0.0414703	0 / 2聽聽聽聽聽
24.csv	Cyclin-dependent kinase 2/cyclin A	CDK2 CCNA1 CCNA2	P24941 P78396 P20248	CHEMBL2094128	Other cytosolic protein	0.0414703	18 / 1聽聽聽聽聽
24.csv	Monoamine oxidase A	MAOA	P21397	CHEMBL1951	Oxidoreductase	0.0414703	25 / 71聽聽聽聽聽
24.csv	Estrogen receptor beta	ESR2	Q92731	CHEMBL242	Nuclear receptor	0.0312266	7 / 62聽聽聽聽聽
24.csv	Arachidonate 5-lipoxygenase	ALOX5	P09917	CHEMBL215	Oxidoreductase	0.0312266	16 / 1聽聽聽聽聽
24.csv	Cyclin-dependent kinase 4/cyclin D1	CCND1 CDK4	P24385 P11802	CHEMBL1907601	Kinase	0.0312266	0 / 1聽聽聽聽聽
24.csv	Vascular endothelial growth factor receptor 3	FLT4	P35916	CHEMBL1955	Kinase	0.0312266	0 / 1聽聽聽聽聽
24.csv	Insulin receptor	INSR	P06213	CHEMBL1981	Kinase	0.0312266	0 / 1聽聽聽聽聽
24.csv	Focal adhesion kinase 1	PTK2	Q05397	CHEMBL2695	Kinase	0.0312266	0 / 1聽聽聽聽聽
24.csv	Serine/threonine-protein kinase PLK1	PLK1	P53350	CHEMBL3024	Kinase	0.0312266	0 / 2聽聽聽聽聽
24.csv	Tyrosine-protein kinase TIE-2	TEK	Q02763	CHEMBL4128	Kinase	0.0312266	0 / 1聽聽聽聽聽
24.csv	Mitogen-activated protein kinase kinase kinase 8	MAP3K8	P41279	CHEMBL4899	Kinase	0.0312266	0 / 1聽聽聽聽聽
24.csv	Heat shock 70 kDa protein 1	HSPA1A	P0DMV8	CHEMBL5460	Other cytosolic protein	0.0312266	0 / 1聽聽聽聽聽
24.csv	NUAK family SNF1-like kinase 1	NUAK1	O60285	CHEMBL5784	Kinase	0.0312266	0 / 1聽聽聽聽聽
24.csv	Tyrosine-protein kinase FGR (by homology)	FGR	P09769	CHEMBL4454	Kinase	0.0312266	0 / 1聽聽聽聽聽
24.csv	Carbonic anhydrase VB	CA5B	Q9Y2D0	CHEMBL3969	Lyase	0.0312266	4 / 8聽聽聽聽聽
24.csv	Aldo-keto reductase family 1 member C1	AKR1C1	Q04828	CHEMBL5905	Enzyme	0.0312266	0 / 1聽聽聽聽聽
24.csv	D-amino-acid oxidase	DAO	P14920	CHEMBL5485	Enzyme	0.0312266	17 / 1聽聽聽聽聽
24.csv	Glycogen synthase kinase-3 beta	GSK3B	P49841	CHEMBL262	Kinase	0.0312266	25 / 1聽聽聽聽聽
24.csv	Voltage-gated potassium channel subunit Kv1.3	KCNA3	P22001	CHEMBL4633	Voltage-gated ion channel	0.0312266	0 / 12聽聽聽聽聽
24.csv	Cyclooxygenase-2	PTGS2	P35354	CHEMBL230	Oxidoreductase	0.0312266	7 / 5聽聽聽聽聽
24.csv	Glutathione reductase	GSR	P00390	CHEMBL2755	Oxidoreductase	0.0312266	0 / 1聽聽聽聽聽
24.csv	Estradiol 17-beta-dehydrogenase 3	HSD17B3	P37058	CHEMBL4234	Enzyme	0.0312266	11 / 18聽聽聽聽聽
24.csv	Tyrosine-protein kinase SRC	SRC	P12931	CHEMBL267	Kinase	0.0312266	14 / 1聽聽聽聽聽
24.csv	Vascular endothelial growth factor receptor 2	KDR	P35968	CHEMBL279	Kinase	0.0312266	17 / 2聽聽聽聽聽
24.csv	Acetylcholinesterase	ACHE	P22303	CHEMBL220	Hydrolase	0.0312266	5 / 51聽聽聽聽聽
24.csv	Cytochrome P450 1A2	CYP1A2	P05177	CHEMBL3356	Cytochrome P450	0.0312266	2 / 3聽聽聽聽聽
24.csv	Arylamine N-acetyltransferase 1	NAT1	P18440	CHEMBL5101	Enzyme	0.0312266	3 / 0聽聽聽聽聽
24.csv	Monoamine oxidase B	MAOB	P27338	CHEMBL2039	Oxidoreductase	0.0312266	28 / 116聽聽聽聽聽
24.csv	Protein-tyrosine phosphatase 1B	PTPN1	P18031	CHEMBL335	Phosphatase	0.0312266	2 / 0聽聽聽聽聽
24.csv	Estrogen receptor alpha	ESR1	P03372	CHEMBL206	Nuclear receptor	0.0312266	4 / 43聽聽聽聽聽
24.csv	Myoglobin	MB	P02144	CHEMBL2406892	Unclassified protein	0.0312266	4 / 0聽聽聽聽聽
24.csv	Poly [ADP-ribose] polymerase-1	PARP1	P09874	CHEMBL3105	Enzyme	0.0312266	14 / 0聽聽聽聽聽
24.csv	Calcium-activated potassium channel subunit alpha-1	KCNMA1	Q12791	CHEMBL4304	Voltage-gated ion channel	0.0312266	6 / 0聽聽聽聽聽
24.csv	Receptor protein-tyrosine kinase erbB-2	ERBB2	P04626	CHEMBL1824	Kinase	0.0312266	5 / 1聽聽聽聽聽
24.csv	Squalene monooxygenase (by homology)	SQLE	Q14534	CHEMBL3592	Enzyme	0.0312266	1 / 1聽聽聽聽聽
24.csv	Beta-secretase 1	BACE1	P56817	CHEMBL4822	Protease	0.0312266	9 / 6聽聽聽聽聽
24.csv	Hepatocyte growth factor receptor	MET	P08581	CHEMBL3717	Kinase	0.0312266	27 / 2聽聽聽聽聽
24.csv	Catechol O-methyltransferase (by homology)	COMT	P21964	CHEMBL2023	Transferase	0.0312266	3 / 0聽聽聽聽聽
24.csv	G-protein coupled receptor 35	GPR35	Q9HC97	CHEMBL1293267	Family A G protein-coupled receptor	0.0312266	1 / 2聽聽聽聽聽
24.csv	CDK9/cyclin T1	CDK9 CCNT1	P50750 O60563	CHEMBL2111389	Other cytosolic protein	0.0312266	1 / 0聽聽聽聽聽
24.csv	Aldo-keto-reductase family 1 member C3	AKR1C3	P42330	CHEMBL4681	Enzyme	0.0312266	1 / 1聽聽聽聽聽
24.csv	Alkaline phosphatase placental-like	ALPG	P10696	CHEMBL3402	Enzyme	0.0312266	4 / 0聽聽聽聽聽
24.csv	Phospholipase A-2-activating protein	PLAA	Q9Y263	CHEMBL6114	Unclassified protein	0.0312266	7 / 0聽聽聽聽聽
24.csv	Aldose reductase	AKR1B1	P15121	CHEMBL1900	Enzyme	0.0312266	5 / 9聽聽聽聽聽
24.csv	Serine/threonine-protein kinase Aurora-A	AURKA	O14965	CHEMBL4722	Kinase	0.0312266	8 / 1聽聽聽聽聽
24.csv	Muscarinic acetylcholine receptor M1 (by homology)	CHRM1	P11229	CHEMBL216	Family A G protein-coupled receptor	0.0312266	4 / 0聽聽聽聽聽
24.csv	Amine oxidase, copper containing	AOC3	Q16853	CHEMBL3437	Enzyme	0.0312266	1 / 0聽聽聽聽聽
24.csv	Serine/threonine-protein kinase Aurora-B	AURKB	Q96GD4	CHEMBL2185	Kinase	0.0312266	5 / 3聽聽聽聽聽
24.csv	CDGSH iron-sulfur domain-containing protein 1	CISD1	Q9NZ45	CHEMBL1795168	Unclassified protein	0.0312266	2 / 0聽聽聽聽聽
24.csv	Serine/threonine-protein kinase AKT	AKT1	P31749	CHEMBL4282	Kinase	0	3 / 1聽聽聽聽聽
24.csv	Plectin	PLEC	Q15149	CHEMBL1293240	Unclassified protein	0	1 / 0聽聽聽聽聽
24.csv	Casein kinase I alpha	CSNK1A1	P48729	CHEMBL2793	Kinase	0	1 / 0聽聽聽聽聽
24.csv	Casein kinase I delta	CSNK1D	P48730	CHEMBL2828	Kinase	0	1 / 0聽聽聽聽聽
24.csv	HMG-CoA reductase	HMGCR	P04035	CHEMBL402	Oxidoreductase	0	3 / 0聽聽聽聽聽
24.csv	Alkaline phosphatase, tissue-nonspecific isozyme	ALPL	P05186	CHEMBL5979	Enzyme	0	10 / 0聽聽聽聽聽
24.csv	Serine/threonine-protein kinase B-raf	BRAF	P15056	CHEMBL5145	Kinase	0	3 / 1聽聽聽聽聽
24.csv	Succinate semialdehyde dehydrogenase	ALDH5A1	P51649	CHEMBL1911	Oxidoreductase	0	1 / 0聽聽聽聽聽
24.csv	Gamma-amino-N-butyrate transaminase	ABAT	P80404	CHEMBL2044	Transferase	0	3 / 0聽聽聽聽聽
24.csv	Casein kinase II alpha	CSNK2A1	P68400	CHEMBL3629	Kinase	0	2 / 2聽聽聽聽聽
24.csv	DNA-(apurinic or apyrimidinic site) lyase	APEX1	P27695	CHEMBL5619	Enzyme	0	0 / 1聽聽聽聽聽
24.csv	Interleukin-8 receptor A	CXCR1	P25024	CHEMBL4029	Family A G protein-coupled receptor	0	1 / 0聽聽聽聽聽
24.csv	PI3-kinase p110-gamma subunit	PIK3CG	P48736	CHEMBL3267	Enzyme	0	9 / 0聽聽聽聽聽
24.csv	Dual specificty protein kinase CLK1	CLK1	P49759	CHEMBL4224	Kinase	0	11 / 0聽聽聽聽聽
24.csv	Dual specificity tyrosine-phosphorylation-regulated kinase 1B	DYRK1B	Q9Y463	CHEMBL5543	Kinase	0	14 / 0聽聽聽聽聽
24.csv	Insulin-like growth factor I receptor	IGF1R	P08069	CHEMBL1957	Kinase	0	3 / 2聽聽聽聽聽
24.csv	Leukocyte common antigen	PTPRC	P08575	CHEMBL3243	Enzyme	0	4 / 0聽聽聽聽聽
24.csv	G protein-coupled receptor kinase 6	GRK6	P43250	CHEMBL6144	Kinase	0	0 / 1聽聽聽聽聽
24.csv	Troponin, cardiac muscle	TNNC1 TNNT2 TNNI3	P63316 P45379 P19429	CHEMBL2095202	Unclassified protein	0	0 / 1聽聽聽聽聽
24.csv	Ephrin receptor	EPHB4	P54760	CHEMBL5147	Kinase	0	4 / 1聽聽聽聽聽
24.csv	Platelet-derived growth factor receptor beta	PDGFRB	P09619	CHEMBL1913	Kinase	0	1 / 1聽聽聽聽聽
24.csv	Serine/threonine-protein kinase PLK4	PLK4	O00444	CHEMBL3788	Kinase	0	4 / 1聽聽聽聽聽
24.csv	Tyrosine-protein kinase Lyn	LYN	P07948	CHEMBL3905	Kinase	0	1 / 1聽聽聽聽聽
24.csv	Purine nucleoside phosphorylase (by homology)	PNP	P00491	CHEMBL4338	Enzyme	0	11 / 0聽聽聽聽聽
24.csv	Trace amine-associated receptor 1 (by homology)	TAAR1	Q96RJ0	CHEMBL5857	Family A G protein-coupled receptor	0	46 / 0聽聽聽聽聽
24.csv	Serine/threonine-protein kinase PIM3	PIM3	Q86V86	CHEMBL5407	Kinase	0	14 / 0聽聽聽聽聽
24.csv	Serotonin 2b (5-HT2b) receptor	HTR2B	P41595	CHEMBL1833	Family A G protein-coupled receptor	0	12 / 0聽聽聽聽聽
24.csv	Telomerase reverse transcriptase	TERT	O14746	CHEMBL2916	Enzyme	0	5 / 0聽聽聽聽聽
24.csv	Carbonic anhydrase III	CA3	P07451	CHEMBL2885	Lyase	0	2 / 6聽聽聽聽聽
24.csv	Tyrosine-protein kinase JAK1	JAK1	P23458	CHEMBL2835	Kinase	0	3 / 0聽聽聽聽聽
24.csv	Tyrosine-protein kinase JAK2	JAK2	O60674	CHEMBL2971	Kinase	0	8 / 0聽聽聽聽聽
24.csv	Tyrosine-protein kinase TYK2	TYK2	P29597	CHEMBL3553	Kinase	0	3 / 0聽聽聽聽聽
24.csv	Thrombin	F2	P00734	CHEMBL204	Protease	0	9 / 0聽聽聽聽聽
24.csv	Serine/threonine-protein kinase Chk1	CHEK1	O14757	CHEMBL4630	Kinase	0	13 / 0聽聽聽聽聽
24.csv	Serine/threonine-protein kinase WEE1	WEE1	P30291	CHEMBL5491	Kinase	0	2 / 0聽聽聽聽聽
24.csv	Alpha-2a adrenergic receptor	ADRA2A	P08913	CHEMBL1867	Family A G protein-coupled receptor	0	8 / 0聽聽聽聽聽
24.csv	Adrenergic receptor alpha-2	ADRA2C	P18825	CHEMBL1916	Family A G protein-coupled receptor	0	7 / 0聽聽聽聽聽
25.csv	Carbonic anhydrase II	CA2	P00918	CHEMBL205	Lyase	1	59 / 20聽聽聽聽聽
25.csv	Carbonic anhydrase VII	CA7	P43166	CHEMBL2326	Lyase	1	11 / 19聽聽聽聽聽
25.csv	Carbonic anhydrase I	CA1	P00915	CHEMBL261	Lyase	1	54 / 24聽聽聽聽聽
25.csv	Carbonic anhydrase VI	CA6	P23280	CHEMBL3025	Lyase	1	7 / 15聽聽聽聽聽
25.csv	Carbonic anhydrase XII	CA12	O43570	CHEMBL3242	Lyase	1	25 / 21聽聽聽聽聽
25.csv	Carbonic anhydrase XIV	CA14	Q9ULX7	CHEMBL3510	Lyase	1	10 / 19聽聽聽聽聽
25.csv	Carbonic anhydrase IX	CA9	Q16790	CHEMBL3594	Lyase	1	20 / 26聽聽聽聽聽
25.csv	Carbonic anhydrase VA	CA5A	P35218	CHEMBL4789	Lyase	1	10 / 15聽聽聽聽聽
25.csv	Carbonic anhydrase VB	CA5B	Q9Y2D0	CHEMBL3969	Lyase	0.133587	5 / 13聽聽聽聽聽
25.csv	Monoamine oxidase B	MAOB	P27338	CHEMBL2039	Oxidoreductase	0.0823338	2 / 38聽聽聽聽聽
25.csv	Aldose reductase	AKR1B1	P15121	CHEMBL1900	Enzyme	0.0721804	68 / 34聽聽聽聽聽
25.csv	Arachidonate 5-lipoxygenase	ALOX5	P09917	CHEMBL215	Oxidoreductase	0.0721804	1 / 44聽聽聽聽聽
25.csv	Matrix metalloproteinase 9	MMP9	P14780	CHEMBL321	Protease	0.0721804	2 / 24聽聽聽聽聽
25.csv	Matrix metalloproteinase 1	MMP1	P03956	CHEMBL332	Protease	0.0721804	2 / 24聽聽聽聽聽
25.csv	Matrix metalloproteinase 2	MMP2	P08253	CHEMBL333	Protease	0.0721804	2 / 23聽聽聽聽聽
25.csv	Protein-tyrosine phosphatase 1B	PTPN1	P18031	CHEMBL335	Phosphatase	0.0721804	35 / 2聽聽聽聽聽
25.csv	Carbonic anhydrase XIII (by homology)	CA13	Q8N1Q1	CHEMBL3912	Lyase	0.0721804	10 / 10聽聽聽聽聽
25.csv	Carbonic anhydrase III	CA3	P07451	CHEMBL2885	Lyase	0.0619149	5 / 4聽聽聽聽聽
25.csv	Beta amyloid A4 protein	APP	P05067	CHEMBL2487	Membrane receptor	0.0517133	0 / 55聽聽聽聽聽
25.csv	Nuclear factor erythroid 2-related factor 2	NFE2L2	Q16236	CHEMBL1075094	Unclassified protein	0.0414703	0 / 4聽聽聽聽聽
25.csv	Signal transducer and activator of transcription 3	STAT3	P40763	CHEMBL4026	Transcription factor	0.0414703	0 / 1聽聽聽聽聽
25.csv	11-beta-hydroxysteroid dehydrogenase 1	HSD11B1	P28845	CHEMBL4235	Enzyme	0.0414703	0 / 4聽聽聽聽聽
25.csv	Estrogen receptor beta	ESR2	Q92731	CHEMBL242	Nuclear receptor	0.0414703	4 / 17聽聽聽聽聽
25.csv	Carbonic anhydrase IV	CA4	P22748	CHEMBL3729	Lyase	0.0414703	4 / 7聽聽聽聽聽
25.csv	Toll-like receptor 4 (by homology)	TLR4	O00206	CHEMBL5255	Toll-like and Il-1 receptors	0.0414703	0 / 13聽聽聽聽聽
25.csv	Hepatocyte growth factor receptor	MET	P08581	CHEMBL3717	Kinase	0.0312266	0 / 22聽聽聽聽聽
25.csv	Cytochrome P450 1A1	CYP1A1	P04798	CHEMBL2231	Cytochrome P450	0.0312266	0 / 9聽聽聽聽聽
25.csv	Cytochrome P450 1A2	CYP1A2	P05177	CHEMBL3356	Cytochrome P450	0.0312266	0 / 5聽聽聽聽聽
25.csv	Quinone reductase 2	NQO2	P16083	CHEMBL3959	Enzyme	0.0312266	0 / 17聽聽聽聽聽
25.csv	Cytochrome P450 1B1	CYP1B1	Q16678	CHEMBL4878	Cytochrome P450	0.0312266	0 / 25聽聽聽聽聽
25.csv	Cyclooxygenase-1	PTGS1	P23219	CHEMBL221	Oxidoreductase	0.0312266	4 / 17聽聽聽聽聽
25.csv	Carboxypeptidase A1	CPA1	P15085	CHEMBL2088	Protease	0.0312266	11 / 0聽聽聽聽聽
25.csv	Epidermal growth factor receptor erbB1	EGFR	P00533	CHEMBL203	Kinase	0.0312266	4 / 34聽聽聽聽聽
25.csv	Transthyretin	TTR	P02766	CHEMBL3194	Secreted protein	0.0312266	5 / 6聽聽聽聽聽
25.csv	Lysine-specific demethylase 4D-like	KDM4E	B2RXH2	CHEMBL1293226	Eraser	0.0312266	5 / 0聽聽聽聽聽
25.csv	Lysine-specific demethylase 3A	KDM3A	Q9Y4C1	CHEMBL1938209	Eraser	0.0312266	2 / 0聽聽聽聽聽
25.csv	Lysine-specific demethylase 6B	KDM6B	O15054	CHEMBL1938211	Eraser	0.0312266	2 / 0聽聽聽聽聽
25.csv	Alpha-ketoglutarate-dependent dioxygenase FTO	FTO	Q9C0B1	CHEMBL2331065	Oxidoreductase	0.0312266	2 / 0聽聽聽聽聽
25.csv	Lysine-specific demethylase 4A	KDM4A	O75164	CHEMBL5896	Eraser	0.0312266	7 / 0聽聽聽聽聽
25.csv	Lysine-specific demethylase 4C	KDM4C	Q9H3R0	CHEMBL6175	Eraser	0.0312266	10 / 0聽聽聽聽聽
25.csv	Cyclooxygenase-2	PTGS2	P35354	CHEMBL230	Oxidoreductase	0.0312266	11 / 47聽聽聽聽聽
25.csv	Tubulin beta-1 chain	TUBB1	Q9H4B7	CHEMBL1915	Structural protein	0.0312266	0 / 29聽聽聽聽聽
25.csv	Nuclear factor NF-kappa-B p65 subunit	RELA	Q04206	CHEMBL5533	Transcription factor	0.0312266	0 / 13聽聽聽聽聽
25.csv	Monocarboxylate transporter 1 (by homology)	SLC16A1	P53985	CHEMBL4360	Electrochemical transporter	0.0312266	2 / 12聽聽聽聽聽
25.csv	Toll-like receptor (TLR7/TLR9)	TLR9	Q9NR96	CHEMBL5804	Toll-like and Il-1 receptors	0.0312266	0 / 3聽聽聽聽聽
25.csv	Tyrosine-protein kinase FYN	FYN	P06241	CHEMBL1841	Kinase	0.0312266	4 / 2聽聽聽聽聽
25.csv	Tyrosine-protein kinase LCK	LCK	P06239	CHEMBL258	Kinase	0.0312266	3 / 9聽聽聽聽聽
25.csv	Aldo-keto reductase family 1 member B10	AKR1B10	O60218	CHEMBL5983	Enzyme	0.0312266	0 / 18聽聽聽聽聽
25.csv	Arachidonate 15-lipoxygenase	ALOX15	P16050	CHEMBL2903	Enzyme	0.0312266	0 / 2聽聽聽聽聽
25.csv	Protein kinase C epsilon	PRKCE	Q02156	CHEMBL3582	Kinase	0.0312266	0 / 2聽聽聽聽聽
25.csv	Coagulation factor VII/tissue factor	F3	P13726	CHEMBL4081	Surface antigen	0.0312266	0 / 9聽聽聽聽聽
25.csv	Nitric oxide synthase, inducible	NOS2	P35228	CHEMBL4481	Enzyme	0.0312266	0 / 7聽聽聽聽聽
25.csv	Low affinity neurotrophin receptor p75NTR	NGFR	P08138	CHEMBL4762	Membrane receptor	0.0312266	2 / 0聽聽聽聽聽
25.csv	Cyclin-dependent kinase 4/cyclin D1	CCND1 CDK4	P24385 P11802	CHEMBL1907601	Kinase	0.0312266	0 / 1聽聽聽聽聽
25.csv	Tubulin beta-3 chain	TUBB3	Q13509	CHEMBL2597	Structural protein	0.0312266	0 / 1聽聽聽聽聽
25.csv	P-glycoprotein 1	ABCB1	P08183	CHEMBL4302	Primary active transporter	0.0312266	0 / 14聽聽聽聽聽
25.csv	Fructose-1,6-bisphosphatase	FBP1	P09467	CHEMBL3975	Enzyme	0.0312266	22 / 0聽聽聽聽聽
25.csv	Angiotensin-converting enzyme (by homology)	ACE	P12821	CHEMBL1808	Protease	0.0312266	16 / 0聽聽聽聽聽
25.csv	Renin	REN	P00797	CHEMBL286	Protease	0.0312266	1 / 0聽聽聽聽聽
25.csv	DNA topoisomerase II alpha	TOP2A	P11388	CHEMBL1806	Isomerase	0.0312266	0 / 15聽聽聽聽聽
25.csv	Glyoxalase I	GLO1	Q04760	CHEMBL2424	Enzyme	0.0312266	0 / 5聽聽聽聽聽
25.csv	Lysine-specific demethylase 2A	KDM2A	Q9Y2K7	CHEMBL1938210	Eraser	0.0312266	3 / 0聽聽聽聽聽
25.csv	Thiopurine S-methyltransferase	TPMT	P51580	CHEMBL2500	Enzyme	0.0312266	4 / 0聽聽聽聽聽
25.csv	Monoamine oxidase A	MAOA	P21397	CHEMBL1951	Oxidoreductase	0.0312266	2 / 14聽聽聽聽聽
25.csv	Beta-secretase 1	BACE1	P56817	CHEMBL4822	Protease	0.0312266	1 / 62聽聽聽聽聽
25.csv	Aryl hydrocarbon receptor	AHR	P35869	CHEMBL3201	Transcription factor	0.0312266	0 / 4聽聽聽聽聽
25.csv	Thrombin	F2	P00734	CHEMBL204	Protease	0.0312266	9 / 0聽聽聽聽聽
25.csv	Axin1/beta-catenin	CTNNB1	P35222	CHEMBL5866	Unclassified protein	0.0312266	3 / 0聽聽聽聽聽
25.csv	Poly [ADP-ribose] polymerase-1	PARP1	P09874	CHEMBL3105	Enzyme	0.0312266	10 / 0聽聽聽聽聽
25.csv	Solute carrier family 13 member 5	SLC13A5	Q86YT5	CHEMBL3769293	Electrochemical transporter	0.0312266	10 / 0聽聽聽聽聽
25.csv	Inhibitor of NF-kappa-B kinase (IKK)	IKBKG IKBKB CHUK	Q9Y6K9 O14920 O15111	CHEMBL2111328	Kinase	0	0 / 3聽聽聽聽聽
25.csv	AMP deaminase 3	AMPD3	Q01432	CHEMBL2912	Enzyme	0	6 / 0聽聽聽聽聽
25.csv	Endothelin-converting enzyme 1	ECE1	P42892	CHEMBL4791	Protease	0	7 / 0聽聽聽聽聽
25.csv	Kynurenine 3-monooxygenase	KMO	O15229	CHEMBL2145	Oxidoreductase	0	19 / 0聽聽聽聽聽
25.csv	Neprilysin	MME	P08473	CHEMBL1944	Protease	0	23 / 0聽聽聽聽聽
25.csv	Intercellular adhesion molecule (ICAM-1), Integrin alpha-L/beta-2	ITGAL ICAM1 ITGB2	P20701 P05362 P05107	CHEMBL2096661	Membrane receptor	0	3 / 0聽聽聽聽聽
25.csv	G protein-coupled receptor 44	PTGDR2	Q9Y5Y4	CHEMBL5071	Family A G protein-coupled receptor	0	4 / 0聽聽聽聽聽
25.csv	c-Jun N-terminal kinase 1	MAPK8	P45983	CHEMBL2276	Kinase	0	2 / 0聽聽聽聽聽
25.csv	Norepinephrine transporter	SLC6A2	P23975	CHEMBL222	Electrochemical transporter	0	0 / 2聽聽聽聽聽
25.csv	Aldo-keto reductase family 1 member C4	AKR1C4	P17516	CHEMBL4999	Enzyme	0	0 / 1聽聽聽聽聽
25.csv	Bifunctional protein NCOAT	OGA	O60502	CHEMBL5921	Enzyme	0	24 / 0聽聽聽聽聽
25.csv	Macrophage migration inhibitory factor	MIF	P14174	CHEMBL2085	Enzyme	0	1 / 1聽聽聽聽聽
25.csv	Thymidylate kinase	DTYMK	P23919	CHEMBL4388	Transferase	0	1 / 0聽聽聽聽聽
25.csv	Aldo-keto-reductase family 1 member C3	AKR1C3	P42330	CHEMBL4681	Enzyme	0	22 / 31聽聽聽聽聽
25.csv	T-cell protein-tyrosine phosphatase	PTPN2	P17706	CHEMBL3807	Phosphatase	0	5 / 0聽聽聽聽聽
25.csv	Dual specificity tyrosine-phosphorylation-regulated kinase 1B	DYRK1B	Q9Y463	CHEMBL5543	Kinase	0	0 / 6聽聽聽聽聽
25.csv	Adenosine deaminase	ADA	P00813	CHEMBL1910	Hydrolase	0	6 / 0聽聽聽聽聽
25.csv	ATP-citrate synthase	ACLY	P53396	CHEMBL3720	Enzyme	0	10 / 0聽聽聽聽聽
25.csv	D-amino-acid oxidase	DAO	P14920	CHEMBL5485	Enzyme	0	8 / 0聽聽聽聽聽
25.csv	Glycogen synthase kinase-3 beta	GSK3B	P49841	CHEMBL262	Kinase	0	2 / 10聽聽聽聽聽
25.csv	Liver glycogen phosphorylase	PYGL	P06737	CHEMBL2568	Enzyme	0	18 / 0聽聽聽聽聽
25.csv	Muscle glycogen phosphorylase	PYGM	P11217	CHEMBL3526	Enzyme	0	10 / 0聽聽聽聽聽
25.csv	Alkaline phosphatase, tissue-nonspecific isozyme	ALPL	P05186	CHEMBL5979	Enzyme	0	10 / 0聽聽聽聽聽
25.csv	Endothelin receptor ET-A (by homology)	EDNRA	P25101	CHEMBL252	Family A G protein-coupled receptor	0	0 / 22聽聽聽聽聽
25.csv	Microtubule-associated protein tau	MAPT	P10636	CHEMBL1293224	Unclassified protein	0	0 / 1聽聽聽聽聽
25.csv	NADPH oxidase 4	NOX4	Q9NPH5	CHEMBL1250375	Enzyme	0	2 / 0聽聽聽聽聽
25.csv	ATP-binding cassette sub-family G member 2	ABCG2	Q9UNQ0	CHEMBL5393	Primary active transporter	0	0 / 33聽聽聽聽聽
25.csv	Aldo-keto reductase family 1 member C2	AKR1C2	P52895	CHEMBL5847	Enzyme	0	14 / 1聽聽聽聽聽
25.csv	Glutamate carboxypeptidase II	FOLH1	Q04609	CHEMBL1892	Protease	0	26 / 0聽聽聽聽聽
25.csv	Prostaglandin E synthase	PTGES	O14684	CHEMBL5658	Enzyme	0	4 / 20聽聽聽聽聽
26.csv	Carbonic anhydrase II	CA2	P00918	CHEMBL205	Lyase	1	40 / 20聽聽聽聽聽
26.csv	Carbonic anhydrase VII	CA7	P43166	CHEMBL2326	Lyase	1	6 / 19聽聽聽聽聽
26.csv	Carbonic anhydrase I	CA1	P00915	CHEMBL261	Lyase	1	34 / 24聽聽聽聽聽
26.csv	Carbonic anhydrase VI	CA6	P23280	CHEMBL3025	Lyase	1	5 / 15聽聽聽聽聽
26.csv	Carbonic anhydrase XII	CA12	O43570	CHEMBL3242	Lyase	1	17 / 21聽聽聽聽聽
26.csv	Carbonic anhydrase XIV	CA14	Q9ULX7	CHEMBL3510	Lyase	1	7 / 19聽聽聽聽聽
26.csv	Carbonic anhydrase IX	CA9	Q16790	CHEMBL3594	Lyase	1	14 / 26聽聽聽聽聽
26.csv	Carbonic anhydrase VA	CA5A	P35218	CHEMBL4789	Lyase	1	5 / 15聽聽聽聽聽
26.csv	Carbonic anhydrase VB	CA5B	Q9Y2D0	CHEMBL3969	Lyase	0.133587	4 / 13聽聽聽聽聽
26.csv	Monoamine oxidase B	MAOB	P27338	CHEMBL2039	Oxidoreductase	0.0721804	2 / 38聽聽聽聽聽
26.csv	Arachidonate 5-lipoxygenase	ALOX5	P09917	CHEMBL215	Oxidoreductase	0.0721804	1 / 44聽聽聽聽聽
26.csv	Matrix metalloproteinase 9	MMP9	P14780	CHEMBL321	Protease	0.0721804	1 / 24聽聽聽聽聽
26.csv	Matrix metalloproteinase 1	MMP1	P03956	CHEMBL332	Protease	0.0721804	1 / 24聽聽聽聽聽
26.csv	Matrix metalloproteinase 2	MMP2	P08253	CHEMBL333	Protease	0.0721804	1 / 23聽聽聽聽聽
26.csv	Protein-tyrosine phosphatase 1B	PTPN1	P18031	CHEMBL335	Phosphatase	0.0721804	27 / 2聽聽聽聽聽
26.csv	Carbonic anhydrase XIII (by homology)	CA13	Q8N1Q1	CHEMBL3912	Lyase	0.0721804	2 / 10聽聽聽聽聽
26.csv	Carbonic anhydrase III	CA3	P07451	CHEMBL2885	Lyase	0.0619149	3 / 4聽聽聽聽聽
26.csv	Aldose reductase	AKR1B1	P15121	CHEMBL1900	Enzyme	0.0517133	60 / 34聽聽聽聽聽
26.csv	Beta amyloid A4 protein	APP	P05067	CHEMBL2487	Membrane receptor	0.0517133	0 / 55聽聽聽聽聽
26.csv	Nuclear factor erythroid 2-related factor 2	NFE2L2	Q16236	CHEMBL1075094	Unclassified protein	0.0414703	0 / 4聽聽聽聽聽
26.csv	Signal transducer and activator of transcription 3	STAT3	P40763	CHEMBL4026	Transcription factor	0.0414703	0 / 1聽聽聽聽聽
26.csv	11-beta-hydroxysteroid dehydrogenase 1	HSD11B1	P28845	CHEMBL4235	Enzyme	0.0414703	0 / 4聽聽聽聽聽
26.csv	Estrogen receptor beta	ESR2	Q92731	CHEMBL242	Nuclear receptor	0.0414703	3 / 17聽聽聽聽聽
26.csv	Carbonic anhydrase IV	CA4	P22748	CHEMBL3729	Lyase	0.0414703	2 / 7聽聽聽聽聽
26.csv	Toll-like receptor 4 (by homology)	TLR4	O00206	CHEMBL5255	Toll-like and Il-1 receptors	0.0414703	0 / 13聽聽聽聽聽
26.csv	Hepatocyte growth factor receptor	MET	P08581	CHEMBL3717	Kinase	0.0312266	0 / 22聽聽聽聽聽
26.csv	Cytochrome P450 1A1	CYP1A1	P04798	CHEMBL2231	Cytochrome P450	0.0312266	0 / 9聽聽聽聽聽
26.csv	Cytochrome P450 1A2	CYP1A2	P05177	CHEMBL3356	Cytochrome P450	0.0312266	0 / 5聽聽聽聽聽
26.csv	Quinone reductase 2	NQO2	P16083	CHEMBL3959	Enzyme	0.0312266	0 / 17聽聽聽聽聽
26.csv	Cytochrome P450 1B1	CYP1B1	Q16678	CHEMBL4878	Cytochrome P450	0.0312266	0 / 25聽聽聽聽聽
26.csv	Cyclooxygenase-1	PTGS1	P23219	CHEMBL221	Oxidoreductase	0.0312266	2 / 17聽聽聽聽聽
26.csv	Epidermal growth factor receptor erbB1	EGFR	P00533	CHEMBL203	Kinase	0.0312266	4 / 34聽聽聽聽聽
26.csv	Transthyretin	TTR	P02766	CHEMBL3194	Secreted protein	0.0312266	5 / 6聽聽聽聽聽
26.csv	Cyclooxygenase-2	PTGS2	P35354	CHEMBL230	Oxidoreductase	0.0312266	9 / 47聽聽聽聽聽
26.csv	Tubulin beta-1 chain	TUBB1	Q9H4B7	CHEMBL1915	Structural protein	0.0312266	0 / 29聽聽聽聽聽
26.csv	Nuclear factor NF-kappa-B p65 subunit	RELA	Q04206	CHEMBL5533	Transcription factor	0.0312266	0 / 13聽聽聽聽聽
26.csv	Adenosine A1 receptor	ADORA1	P30542	CHEMBL226	Family A G protein-coupled receptor	0.0312266	0 / 1聽聽聽聽聽
26.csv	Adenosine A2a receptor	ADORA2A	P29274	CHEMBL251	Family A G protein-coupled receptor	0.0312266	0 / 1聽聽聽聽聽
26.csv	Adenosine A2b receptor	ADORA2B	P29275	CHEMBL255	Family A G protein-coupled receptor	0.0312266	0 / 1聽聽聽聽聽
26.csv	Toll-like receptor (TLR7/TLR9)	TLR9	Q9NR96	CHEMBL5804	Toll-like and Il-1 receptors	0.0312266	0 / 3聽聽聽聽聽
26.csv	Aldo-keto reductase family 1 member B10	AKR1B10	O60218	CHEMBL5983	Enzyme	0.0312266	0 / 18聽聽聽聽聽
26.csv	Arachidonate 15-lipoxygenase	ALOX15	P16050	CHEMBL2903	Enzyme	0.0312266	0 / 2聽聽聽聽聽
26.csv	Protein kinase C epsilon	PRKCE	Q02156	CHEMBL3582	Kinase	0.0312266	0 / 2聽聽聽聽聽
26.csv	Coagulation factor VII/tissue factor	F3	P13726	CHEMBL4081	Surface antigen	0.0312266	0 / 9聽聽聽聽聽
26.csv	Nitric oxide synthase, inducible	NOS2	P35228	CHEMBL4481	Enzyme	0.0312266	0 / 7聽聽聽聽聽
26.csv	Tyrosine-protein kinase FYN	FYN	P06241	CHEMBL1841	Kinase	0.0312266	4 / 2聽聽聽聽聽
26.csv	Tyrosine-protein kinase LCK	LCK	P06239	CHEMBL258	Kinase	0.0312266	4 / 9聽聽聽聽聽
26.csv	Monocarboxylate transporter 1 (by homology)	SLC16A1	P53985	CHEMBL4360	Electrochemical transporter	0.0312266	2 / 12聽聽聽聽聽
26.csv	Cyclin-dependent kinase 4/cyclin D1	CCND1 CDK4	P24385 P11802	CHEMBL1907601	Kinase	0.0312266	0 / 1聽聽聽聽聽
26.csv	Tubulin beta-3 chain	TUBB3	Q13509	CHEMBL2597	Structural protein	0.0312266	0 / 1聽聽聽聽聽
26.csv	P-glycoprotein 1	ABCB1	P08183	CHEMBL4302	Primary active transporter	0.0312266	0 / 14聽聽聽聽聽
26.csv	DNA topoisomerase II alpha	TOP2A	P11388	CHEMBL1806	Isomerase	0.0312266	0 / 15聽聽聽聽聽
26.csv	Fructose-1,6-bisphosphatase	FBP1	P09467	CHEMBL3975	Enzyme	0.0312266	22 / 0聽聽聽聽聽
26.csv	Beta-secretase 1	BACE1	P56817	CHEMBL4822	Protease	0.0312266	1 / 62聽聽聽聽聽
26.csv	Glyoxalase I	GLO1	Q04760	CHEMBL2424	Enzyme	0.0312266	0 / 5聽聽聽聽聽
26.csv	Carboxypeptidase A1	CPA1	P15085	CHEMBL2088	Protease	0.0312266	8 / 0聽聽聽聽聽
26.csv	Lysine-specific demethylase 4C	KDM4C	Q9H3R0	CHEMBL6175	Eraser	0.0312266	7 / 0聽聽聽聽聽
26.csv	Aryl hydrocarbon receptor	AHR	P35869	CHEMBL3201	Transcription factor	0.0312266	0 / 4聽聽聽聽聽
26.csv	AMP deaminase 3	AMPD3	Q01432	CHEMBL2912	Enzyme	0.0312266	3 / 0聽聽聽聽聽
26.csv	Poly [ADP-ribose] polymerase-1	PARP1	P09874	CHEMBL3105	Enzyme	0.0312266	9 / 0聽聽聽聽聽
26.csv	Inhibitor of NF-kappa-B kinase (IKK)	IKBKG IKBKB CHUK	Q9Y6K9 O14920 O15111	CHEMBL2111328	Kinase	0	0 / 3聽聽聽聽聽
26.csv	Solute carrier family 13 member 5	SLC13A5	Q86YT5	CHEMBL3769293	Electrochemical transporter	0	10 / 0聽聽聽聽聽
26.csv	Monoamine oxidase A	MAOA	P21397	CHEMBL1951	Oxidoreductase	0	2 / 14聽聽聽聽聽
26.csv	Norepinephrine transporter	SLC6A2	P23975	CHEMBL222	Electrochemical transporter	0	0 / 2聽聽聽聽聽
26.csv	MAP kinase ERK2	MAPK1	P28482	CHEMBL4040	Kinase	0	0 / 1聽聽聽聽聽
26.csv	Aldo-keto reductase family 1 member C4	AKR1C4	P17516	CHEMBL4999	Enzyme	0	0 / 1聽聽聽聽聽
26.csv	Thrombin	F2	P00734	CHEMBL204	Protease	0	9 / 0聽聽聽聽聽
26.csv	Macrophage migration inhibitory factor	MIF	P14174	CHEMBL2085	Enzyme	0	1 / 1聽聽聽聽聽
26.csv	Low affinity neurotrophin receptor p75NTR	NGFR	P08138	CHEMBL4762	Membrane receptor	0	1 / 0聽聽聽聽聽
26.csv	Dual-specificity tyrosine-phosphorylation regulated kinase 1A	DYRK1A	Q13627	CHEMBL2292	Kinase	0	0 / 7聽聽聽聽聽
26.csv	Dual-specificity tyrosine-phosphorylation regulated kinase 2	DYRK2	Q92630	CHEMBL4376	Kinase	0	0 / 3聽聽聽聽聽
26.csv	Dual specificity tyrosine-phosphorylation-regulated kinase 1B	DYRK1B	Q9Y463	CHEMBL5543	Kinase	0	0 / 6聽聽聽聽聽
26.csv	Axin1/beta-catenin	CTNNB1	P35222	CHEMBL5866	Unclassified protein	0	3 / 0聽聽聽聽聽
26.csv	Neprilysin	MME	P08473	CHEMBL1944	Protease	0	22 / 0聽聽聽聽聽
26.csv	ATP-citrate synthase	ACLY	P53396	CHEMBL3720	Enzyme	0	12 / 0聽聽聽聽聽
26.csv	Endothelin-converting enzyme 1	ECE1	P42892	CHEMBL4791	Protease	0	6 / 0聽聽聽聽聽
26.csv	Alkaline phosphatase, tissue-nonspecific isozyme	ALPL	P05186	CHEMBL5979	Enzyme	0	9 / 0聽聽聽聽聽
26.csv	Endothelin receptor ET-A (by homology)	EDNRA	P25101	CHEMBL252	Family A G protein-coupled receptor	0	0 / 22聽聽聽聽聽
26.csv	Microtubule-associated protein tau	MAPT	P10636	CHEMBL1293224	Unclassified protein	0	0 / 1聽聽聽聽聽
26.csv	c-Jun N-terminal kinase 1	MAPK8	P45983	CHEMBL2276	Kinase	0	2 / 0聽聽聽聽聽
26.csv	ATP-binding cassette sub-family G member 2	ABCG2	Q9UNQ0	CHEMBL5393	Primary active transporter	0	0 / 33聽聽聽聽聽
26.csv	Angiotensin-converting enzyme (by homology)	ACE	P12821	CHEMBL1808	Protease	0	16 / 0聽聽聽聽聽
26.csv	Kynurenine 3-monooxygenase (by homology)	KMO	O15229	CHEMBL2145	Oxidoreductase	0	14 / 0聽聽聽聽聽
26.csv	Renin	REN	P00797	CHEMBL286	Protease	0	1 / 0聽聽聽聽聽
26.csv	P2X purinoceptor 3	P2RX3	P56373	CHEMBL2998	Ligand-gated ion channel	0	6 / 0聽聽聽聽聽
26.csv	Egl nine homolog 1	EGLN1	Q9GZT9	CHEMBL5697	Oxidoreductase	0	8 / 0聽聽聽聽聽
26.csv	G protein-coupled receptor kinase 6	GRK6	P43250	CHEMBL6144	Kinase	0	10 / 0聽聽聽聽聽
26.csv	Histone acetyltransferase p300	EP300	Q09472	CHEMBL3784	Writer	0	1 / 3聽聽聽聽聽
26.csv	Lysine-specific demethylase 4D-like	KDM4E	B2RXH2	CHEMBL1293226	Eraser	0	4 / 0聽聽聽聽聽
26.csv	Glutamate carboxypeptidase II	FOLH1	Q04609	CHEMBL1892	Protease	0	19 / 0聽聽聽聽聽
26.csv	Lysine-specific demethylase 4A	KDM4A	O75164	CHEMBL5896	Eraser	0	5 / 0聽聽聽聽聽
26.csv	Alpha-ketoglutarate-dependent dioxygenase FTO	FTO	Q9C0B1	CHEMBL2331065	Oxidoreductase	0	2 / 0聽聽聽聽聽
26.csv	Leukocyte elastase	ELANE	P08246	CHEMBL248	Protease	0	0 / 2聽聽聽聽聽
26.csv	Estradiol 17-beta-dehydrogenase 2	HSD17B2	P37059	CHEMBL2789	Enzyme	0	0 / 2聽聽聽聽聽
26.csv	Estradiol 17-beta-dehydrogenase 1	HSD17B1	P14061	CHEMBL3181	Enzyme	0	0 / 2聽聽聽聽聽
26.csv	Cytochrome P450 2C9	CYP2C9	P11712	CHEMBL3397	Cytochrome P450	0	0 / 3聽聽聽聽聽
26.csv	Cytochrome P450 3A4	CYP3A4	P08684	CHEMBL340	Cytochrome P450	0	0 / 3聽聽聽聽聽
26.csv	Cytochrome P450 2C19	CYP2C19	P33261	CHEMBL3622	Cytochrome P450	0	0 / 3聽聽聽聽聽
26.csv	Tyrosyl-DNA phosphodiesterase 1	TDP1	Q9NUW8	CHEMBL1075138	Enzyme	0	1 / 0聽聽聽聽聽
26.csv	Mannose-6-phosphate isomerase	MPI	P34949	CHEMBL2758	Isomerase	0	1 / 0聽聽聽聽聽
27.csv	Cyclooxygenase-2	PTGS2	P35354	CHEMBL230	Oxidoreductase	0.0619149	61 / 46聽聽聽聽聽
27.csv	Cyclooxygenase-1	PTGS1	P23219	CHEMBL221	Oxidoreductase	0.0517133	31 / 18聽聽聽聽聽
27.csv	Aldo-keto-reductase family 1 member C3	AKR1C3	P42330	CHEMBL4681	Enzyme	0.0312266	59 / 1聽聽聽聽聽
27.csv	14-3-3 protein gamma	YWHAG	P61981	CHEMBL1293296	Unclassified protein	0.0312266	0 / 1聽聽聽聽聽
27.csv	G protein-coupled receptor 44	PTGDR2	Q9Y5Y4	CHEMBL5071	Family A G protein-coupled receptor	0.0312266	80 / 0聽聽聽聽聽
27.csv	Palmitoleoyl-protein carboxylesterase NOTUM	NOTUM	Q6P988	CHEMBL3714531	Hydrolase	0.0312266	52 / 0聽聽聽聽聽
27.csv	Aldose reductase	AKR1B1	P15121	CHEMBL1900	Enzyme	0.0312266	135 / 10聽聽聽聽聽
27.csv	T1R1/T1R3_UNCURATED	TAS1R3 TAS1R1	Q7RTX0 Q7RTX1	CHEMBL3832641	Family C G protein-coupled receptor	0.0312266	1 / 0聽聽聽聽聽
27.csv	DNA-(apurinic or apyrimidinic site) lyase	APEX1	P27695	CHEMBL5619	Enzyme	0.0312266	16 / 0聽聽聽聽聽
27.csv	Egl nine homolog 3	EGLN3	Q9H6Z9	CHEMBL5705	Enzyme	0.0312266	2 / 0聽聽聽聽聽
27.csv	Prostanoid DP receptor	PTGDR	Q13258	CHEMBL4427	Family A G protein-coupled receptor	0.0312266	8 / 0聽聽聽聽聽
27.csv	c-Jun N-terminal kinase 3	MAPK10	P53779	CHEMBL2637	Kinase	0.0312266	2 / 0聽聽聽聽聽
27.csv	Angiotensin-converting enzyme	ACE	P12821	CHEMBL1808	Protease	0.0312266	66 / 0聽聽聽聽聽
27.csv	Neprilysin	MME	P08473	CHEMBL1944	Protease	0.0312266	33 / 0聽聽聽聽聽
27.csv	Kynurenine 3-monooxygenase	KMO	O15229	CHEMBL2145	Oxidoreductase	0.0312266	51 / 0聽聽聽聽聽
27.csv	Angiotensin-converting enzyme 2	ACE2	Q9BYF1	CHEMBL3736	Protease	0.0312266	3 / 0聽聽聽聽聽
27.csv	Dual specificity phosphatase Cdc25B	CDC25B	P30305	CHEMBL4804	Phosphatase	0.0312266	4 / 0聽聽聽聽聽
27.csv	Solute carrier family 22 member 12	SLC22A12	Q96S37	CHEMBL6120	Electrochemical transporter	0.0312266	29 / 0聽聽聽聽聽
27.csv	Matrix metalloproteinase 12	MMP12	P39900	CHEMBL4393	Protease	0.0312266	4 / 0聽聽聽聽聽
27.csv	Intercellular adhesion molecule (ICAM-1), Integrin alpha-L/beta-2	ITGAL ICAM1 ITGB2	P20701 P05362 P05107	CHEMBL2096661	Membrane receptor	0.0312266	26 / 0聽聽聽聽聽
27.csv	Hydroxycarboxylic acid receptor 2	HCAR2	Q8TDS4	CHEMBL3785	Family A G protein-coupled receptor	0.0312266	30 / 0聽聽聽聽聽
27.csv	Glutathione S-transferase A1	GSTA1	P08263	CHEMBL3409	Enzyme	0.0312266	1 / 0聽聽聽聽聽
27.csv	Casein kinase II alpha	CSNK2A1	P68400	CHEMBL3629	Kinase	0.0312266	14 / 0聽聽聽聽聽
27.csv	Glutathione S-transferase Pi	GSTP1	P09211	CHEMBL3902	Enzyme	0.0312266	1 / 0聽聽聽聽聽
27.csv	Casein kinase II alpha (prime)	CSNK2A2	P19784	CHEMBL4070	Kinase	0.0312266	9 / 0聽聽聽聽聽
27.csv	Neuronal acetylcholine receptor; alpha4/beta2	CHRNA4 CHRNB2	P43681 P17787	CHEMBL1907589	Ligand-gated ion channel	0.0312266	3 / 0聽聽聽聽聽
27.csv	Lysine-specific demethylase 2A	KDM2A	Q9Y2K7	CHEMBL1938210	Eraser	0.0312266	5 / 0聽聽聽聽聽
27.csv	Renin	REN	P00797	CHEMBL286	Protease	0.0312266	4 / 0聽聽聽聽聽
27.csv	Mast cell carboxypeptidase A	CPA3	P15088	CHEMBL2645	Protease	0.0312266	2 / 0聽聽聽聽聽
27.csv	Oxoeicosanoid receptor 1	OXER1	Q8TDS5	CHEMBL1628461	Family A G protein-coupled receptor	0.0312266	2 / 0聽聽聽聽聽
27.csv	Lysine-specific demethylase 3A	KDM3A	Q9Y4C1	CHEMBL1938209	Eraser	0.0312266	3 / 0聽聽聽聽聽
27.csv	Lysine-specific demethylase 5C	KDM5C	P41229	CHEMBL2163176	Eraser	0.0312266	8 / 0聽聽聽聽聽
27.csv	Lysine-specific demethylase 4A	KDM4A	O75164	CHEMBL5896	Eraser	0.0312266	6 / 0聽聽聽聽聽
27.csv	Lysine-specific demethylase 4C	KDM4C	Q9H3R0	CHEMBL6175	Eraser	0.0312266	26 / 0聽聽聽聽聽
27.csv	Poly [ADP-ribose] polymerase-1	PARP1	P09874	CHEMBL3105	Enzyme	0.0312266	17 / 0聽聽聽聽聽
27.csv	Poly [ADP-ribose] polymerase 2 (by homology)	PARP2	Q9UGN5	CHEMBL5366	Enzyme	0.0312266	4 / 0聽聽聽聽聽
27.csv	Insulin-degrading enzyme	IDE	P14735	CHEMBL1293287	Enzyme	0.0312266	2 / 0聽聽聽聽聽
27.csv	Protein phosphatase 2C beta	PPM1B	O75688	CHEMBL2845	Phosphatase	0.0312266	4 / 0聽聽聽聽聽
27.csv	Vitronectin receptor alpha	ITGAV	P06756	CHEMBL3660	Membrane receptor	0	4 / 0聽聽聽聽聽
27.csv	Metabotropic glutamate receptor 4	GRM4	Q14833	CHEMBL2736	Family C G protein-coupled receptor	0	3 / 0聽聽聽聽聽
27.csv	Carboxypeptidase B2 isoform A	CPB2	Q96IY4	CHEMBL3419	Protease	0	10 / 0聽聽聽聽聽
27.csv	Serine/threonine protein phosphatase PP1-gamma catalytic subunit	PPP1CC	P36873	CHEMBL4438	Phosphatase	0	3 / 0聽聽聽聽聽
27.csv	Serine/threonine-protein kinase PIM2	PIM2	Q9P1W9	CHEMBL4523	Kinase	0	3 / 0聽聽聽聽聽
27.csv	Lysine-specific demethylase 4D	KDM4D	Q6B0I6	CHEMBL6138	Eraser	0	6 / 0聽聽聽聽聽
27.csv	Monocarboxylate transporter 1 (by homology)	SLC16A1	P53985	CHEMBL4360	Electrochemical transporter	0	11 / 0聽聽聽聽聽
27.csv	Lysine-specific demethylase 4B	KDM4B	O94953	CHEMBL3313832	Eraser	0	3 / 0聽聽聽聽聽
27.csv	Lysine-specific demethylase 5B	KDM5B	Q9UGL1	CHEMBL3774295	Eraser	0	5 / 0聽聽聽聽聽
27.csv	G-protein coupled receptor kinase 2	GRK2	P25098	CHEMBL4079	Kinase	0	3 / 0聽聽聽聽聽
27.csv	Branched-chain-amino-acid aminotransferase, mitochondrial	BCAT2	O15382	CHEMBL3616354	Transferase	0	2 / 0聽聽聽聽聽
27.csv	Heat shock protein HSP 90-alpha	HSP90AA1	P07900	CHEMBL3880	Other cytosolic protein	0	2 / 0聽聽聽聽聽
27.csv	CREB-binding protein/p53	CREBBP	Q92793	CHEMBL5747	Writer	0	2 / 0聽聽聽聽聽
27.csv	CDK8/Cyclin C	CCNC CDK8	P24863 P49336	CHEMBL3038474	Kinase	0	1 / 0聽聽聽聽聽
27.csv	Mitogen-activated protein kinase kinase kinase 8	MAP3K8	P41279	CHEMBL4899	Kinase	0	2 / 0聽聽聽聽聽
27.csv	Phosphodiesterase 5A	PDE5A	O76074	CHEMBL1827	Phosphodiesterase	0	1 / 0聽聽聽聽聽
27.csv	Neuronal acetylcholine receptor protein alpha-7 subunit	CHRNA7	P36544	CHEMBL2492	Ligand-gated ion channel	0	1 / 0聽聽聽聽聽
27.csv	Aryl hydrocarbon receptor	AHR	P35869	CHEMBL3201	Transcription factor	0	1 / 0聽聽聽聽聽
27.csv	Phosphodiesterase 9A	PDE9A	O76083	CHEMBL3535	Phosphodiesterase	0	2 / 0聽聽聽聽聽
27.csv	Heat shock 70 kDa protein 1	HSPA1A	P0DMV8	CHEMBL5460	Other cytosolic protein	0	8 / 0聽聽聽聽聽
27.csv	Monocarboxylate transporter 4	SLC16A3	O15427	CHEMBL2073663	Electrochemical transporter	0	7 / 0聽聽聽聽聽
27.csv	Carbonic anhydrase II	CA2	P00918	CHEMBL205	Lyase	0	59 / 20聽聽聽聽聽
27.csv	Endothelin-converting enzyme 1	ECE1	P42892	CHEMBL4791	Protease	0	5 / 0聽聽聽聽聽
27.csv	Carboxypeptidase B	CPB1	P15086	CHEMBL2552	Protease	0	3 / 0聽聽聽聽聽
27.csv	Lysine-specific demethylase 6B	KDM6B	O15054	CHEMBL1938211	Eraser	0	8 / 0聽聽聽聽聽
27.csv	Serine/threonine-protein kinase PIM1	PIM1	P11309	CHEMBL2147	Kinase	0	7 / 0聽聽聽聽聽
27.csv	CDGSH iron-sulfur domain-containing protein 1	CISD1	Q9NZ45	CHEMBL1795168	Unclassified protein	0	1 / 0聽聽聽聽聽
27.csv	Poly [ADP-ribose] polymerase 15	PARP15	Q460N3	CHEMBL2176778	Enzyme	0	2 / 0聽聽聽聽聽
27.csv	Poly [ADP-ribose] polymerase 10	PARP10	Q53GL7	CHEMBL2429708	Enzyme	0	5 / 0聽聽聽聽聽
27.csv	SUMO-activating enzyme	SAE1 UBA2	Q9UBE0 Q9UBT2	CHEMBL2095174	Enzyme	0	1 / 0聽聽聽聽聽
27.csv	Lysosomal protective protein	CTSA	P10619	CHEMBL6115	Protease	0	13 / 0聽聽聽聽聽
27.csv	Arachidonate 15-lipoxygenase	ALOX15	P16050	CHEMBL2903	Enzyme	0	0 / 16聽聽聽聽聽
27.csv	Plectin	PLEC	Q15149	CHEMBL1293240	Unclassified protein	0	2 / 0聽聽聽聽聽
27.csv	Macrophage migration inhibitory factor	MIF	P14174	CHEMBL2085	Enzyme	0	1 / 0聽聽聽聽聽
27.csv	D-amino-acid oxidase	DAO	P14920	CHEMBL5485	Enzyme	0	38 / 0聽聽聽聽聽
27.csv	Aminopeptidase B	RNPEP	Q9H4A4	CHEMBL2432	Protease	0	2 / 0聽聽聽聽聽
27.csv	Phospholipase A2 group IIA	PLA2G2A	P14555	CHEMBL3474	Enzyme	0	1 / 0聽聽聽聽聽
27.csv	Egl nine homolog 1	EGLN1	Q9GZT9	CHEMBL5697	Oxidoreductase	0	5 / 0聽聽聽聽聽
27.csv	Solute carrier organic anion transporter family member 1B1	SLCO1B1	Q9Y6L6	CHEMBL1697668	Electrochemical transporter	0	1 / 0聽聽聽聽聽
27.csv	Neurotensin receptor 3	SORT1	Q99523	CHEMBL3091	Membrane receptor	0	10 / 0聽聽聽聽聽
27.csv	Aldehyde reductase (by homology)	AKR1A1	P14550	CHEMBL2246	Enzyme	0	3 / 0聽聽聽聽聽
27.csv	Interleukin-8 receptor A	CXCR1	P25024	CHEMBL4029	Family A G protein-coupled receptor	0	1 / 0聽聽聽聽聽
27.csv	Aldo-keto reductase family 1 member B10	AKR1B10	O60218	CHEMBL5983	Enzyme	0	2 / 0聽聽聽聽聽
27.csv	Serotonin 2a (5-HT2a) receptor (by homology)	HTR2A	P28223	CHEMBL224	Family A G protein-coupled receptor	0	0 / 25聽聽聽聽聽
27.csv	Thyroid hormone receptor beta-1	THRB	P10828	CHEMBL1947	Nuclear receptor	0	8 / 47聽聽聽聽聽
27.csv	Dual specificity protein phosphatase 3	DUSP3	P51452	CHEMBL2635	Phosphatase	0	2 / 0聽聽聽聽聽
27.csv	Carboxypeptidase N, catalytic subunit	CPN1	P15169	CHEMBL4713	Protease	0	1 / 0聽聽聽聽聽
27.csv	Adenosine A1 receptor (by homology)	ADORA1	P30542	CHEMBL226	Family A G protein-coupled receptor	0	1 / 0聽聽聽聽聽
27.csv	Caspase-3	CASP3	P42574	CHEMBL2334	Protease	0	4 / 0聽聽聽聽聽
27.csv	Glutathione reductase	GSR	P00390	CHEMBL2755	Oxidoreductase	0	2 / 0聽聽聽聽聽
27.csv	Matrix metalloproteinase 2	MMP2	P08253	CHEMBL333	Protease	0	3 / 0聽聽聽聽聽
27.csv	G protein-coupled receptor kinase 6	GRK6	P43250	CHEMBL6144	Kinase	0	5 / 0聽聽聽聽聽
27.csv	Phospholipase A2 group 1VB	PLA2G4B	P0C869	CHEMBL4136	Enzyme	0	0 / 3聽聽聽聽聽
27.csv	Transthyretin	TTR	P02766	CHEMBL3194	Secreted protein	0	5 / 7聽聽聽聽聽
27.csv	Dopamine D2 receptor (by homology)	DRD2	P14416	CHEMBL217	Family A G protein-coupled receptor	0	0 / 25聽聽聽聽聽
27.csv	Prostanoid EP1 receptor	PTGER1	P34995	CHEMBL1811	Family A G protein-coupled receptor	0	19 / 0聽聽聽聽聽
27.csv	Carboxypeptidase A1	CPA1	P15085	CHEMBL2088	Protease	0	2 / 0聽聽聽聽聽
27.csv	Interleukin-8 receptor B	CXCR2	P25025	CHEMBL2434	Family A G protein-coupled receptor	0	1 / 0聽聽聽聽聽
27.csv	Serine/threonine-protein phosphatase	PPP5C	Q9BPW0	CHEMBL1293265	Phosphatase	0	2 / 0聽聽聽聽聽
27.csv	Serine/threonine protein phosphatase PP1-alpha catalytic subunit	PPP1CA	P62136	CHEMBL2164	Phosphatase	0	6 / 0聽聽聽聽聽
27.csv	Caspase-1	CASP1	P29466	CHEMBL4801	Protease	0	2 / 0聽聽聽聽聽
27.csv	Protein-tyrosine phosphatase 1B	PTPN1	P18031	CHEMBL335	Phosphatase	0	3 / 3聽聽聽聽聽
28.csv	Cytochrome P450 19A1	CYP19A1	P11511	CHEMBL1978	Cytochrome P450	0.0940054	172 / 49聽聽聽聽聽
28.csv	Potassium-transporting ATPase alpha chain 2	ATP12A	P54707	CHEMBL2933	Primary active transporter	0.0759736	0 / 10聽聽聽聽聽
28.csv	Progesterone receptor	PGR	P06401	CHEMBL208	Nuclear receptor	0.066975	20 / 41聽聽聽聽聽
28.csv	Androgen Receptor	AR	P10275	CHEMBL1871	Nuclear receptor	0.066975	29 / 55聽聽聽聽聽
28.csv	Protein-tyrosine phosphatase 1B	PTPN1	P18031	CHEMBL335	Phosphatase	0.0579569	9 / 39聽聽聽聽聽
28.csv	Tubulin--tyrosine ligase	TTL	Q8NG68	CHEMBL5549	Enzyme	0.0579569	0 / 17聽聽聽聽聽
28.csv	Ribosomal protein S6 kinase alpha 5	RPS6KA5	O75582	CHEMBL4237	Kinase	0.0489529	0 / 3聽聽聽聽聽
28.csv	Taste receptor type 2 member 31	TAS2R31	P59538	CHEMBL2034804	Taste family G protein-coupled receptor	0.0489529	0 / 1聽聽聽聽聽
28.csv	Dual specificity phosphatase Cdc25B	CDC25B	P30305	CHEMBL4804	Phosphatase	0.0489529	10 / 12聽聽聽聽聽
28.csv	Peroxisome proliferator-activated receptor gamma	PPARG	P37231	CHEMBL235	Nuclear receptor	0.0489529	2 / 9聽聽聽聽聽
28.csv	Programmed cell death protein 4	PDCD4	Q53EL6	CHEMBL1781868	Unclassified protein	0.0489529	0 / 8聽聽聽聽聽
28.csv	Phospholipase A2 group 1B	PLA2G1B	P04054	CHEMBL4426	Enzyme	0.0489529	0 / 4聽聽聽聽聽
28.csv	Dual specificity phosphatase Cdc25C	CDC25C	P30307	CHEMBL2378	Phosphatase	0.0489529	0 / 4聽聽聽聽聽
28.csv	HMG-CoA reductase (by homology)	HMGCR	P04035	CHEMBL402	Oxidoreductase	0.0489529	0 / 46聽聽聽聽聽
28.csv	RAS guanyl releasing protein 3	RASGRP3	Q8IV61	CHEMBL3638	Other cytosolic protein	0.0489529	0 / 1聽聽聽聽聽
28.csv	Muscarinic acetylcholine receptor M4	CHRM4	P08173	CHEMBL1821	Family A G protein-coupled receptor	0.0489529	6 / 0聽聽聽聽聽
28.csv	Muscarinic acetylcholine receptor M5	CHRM5	P08912	CHEMBL2035	Family A G protein-coupled receptor	0.0489529	8 / 0聽聽聽聽聽
28.csv	Muscarinic acetylcholine receptor M2	CHRM2	P08172	CHEMBL211	Family A G protein-coupled receptor	0.0489529	24 / 0聽聽聽聽聽
28.csv	Muscarinic acetylcholine receptor M1	CHRM1	P11229	CHEMBL216	Family A G protein-coupled receptor	0.0489529	29 / 0聽聽聽聽聽
28.csv	Muscarinic acetylcholine receptor M3	CHRM3	P20309	CHEMBL245	Family A G protein-coupled receptor	0.0489529	10 / 0聽聽聽聽聽
28.csv	Peroxisome proliferator-activated receptor alpha	PPARA	Q07869	CHEMBL239	Nuclear receptor	0.0489529	0 / 4聽聽聽聽聽
28.csv	Peroxisome proliferator-activated receptor delta	PPARD	Q03181	CHEMBL3979	Nuclear receptor	0.0489529	0 / 3聽聽聽聽聽
28.csv	Protein kinase C alpha	PRKCA	P17252	CHEMBL299	Kinase	0.0489529	2 / 190聽聽聽聽聽
28.csv	Dual specificity phosphatase Cdc25A	CDC25A	P30304	CHEMBL3775	Phosphatase	0.0489529	4 / 16聽聽聽聽聽
28.csv	Tyrosine-protein kinase receptor FLT3	FLT3	P36888	CHEMBL1974	Kinase	0.0489529	5 / 0聽聽聽聽聽
28.csv	Cytochrome P450 11B2	CYP11B2	P19099	CHEMBL2722	Cytochrome P450	0.0489529	112 / 0聽聽聽聽聽
28.csv	Cytochrome P450 11B1	CYP11B1	P15538	CHEMBL1908	Cytochrome P450	0.0489529	91 / 0聽聽聽聽聽
28.csv	Kinesin-like protein 1	KIF11	P52732	CHEMBL4581	Other cytosolic protein	0.0489529	2 / 0聽聽聽聽聽
28.csv	Thromboxane-A synthase	TBXAS1	P24557	CHEMBL1835	Cytochrome P450	0.0489529	17 / 0聽聽聽聽聽
28.csv	Carbonic anhydrase III	CA3	P07451	CHEMBL2885	Lyase	0.0489529	4 / 0聽聽聽聽聽
28.csv	Steroid 5-alpha-reductase 1	SRD5A1	P18405	CHEMBL1787	Oxidoreductase	0.0489529	59 / 0聽聽聽聽聽
28.csv	Myeloperoxidase	MPO	P05164	CHEMBL2439	Enzyme	0.0489529	7 / 0聽聽聽聽聽
28.csv	Protein farnesyltransferase	FNTA FNTB	P49354 P49356	CHEMBL2094108	Enzyme	0.0489529	11 / 9聽聽聽聽聽
28.csv	Monoamine oxidase A	MAOA	P21397	CHEMBL1951	Oxidoreductase	0.0489529	38 / 1聽聽聽聽聽
28.csv	Thymidylate synthase	TYMS	P04818	CHEMBL1952	Transferase	0.0489529	5 / 0聽聽聽聽聽
28.csv	Alcohol dehydrogenase alpha chain	ADH1A	P07327	CHEMBL1970	Oxidoreductase	0.0489529	13 / 0聽聽聽聽聽
28.csv	DNA-dependent protein kinase	PRKDC	P78527	CHEMBL3142	Kinase	0.0489529	1 / 0聽聽聽聽聽
28.csv	Potassium channel subfamily K member 2 (by homology)	KCNK2	O95069	CHEMBL2321615	Voltage-gated ion channel	0.0489529	1 / 0聽聽聽聽聽
28.csv	Poly [ADP-ribose] polymerase-1	PARP1	P09874	CHEMBL3105	Enzyme	0.0489529	30 / 0聽聽聽聽聽
28.csv	Leukocyte common antigen	PTPRC	P08575	CHEMBL3243	Enzyme	0.0489529	5 / 0聽聽聽聽聽
28.csv	Receptor-type tyrosine-protein phosphatase F (LAR)	PTPRF	P10586	CHEMBL3521	Membrane receptor	0.0489529	2 / 0聽聽聽聽聽
28.csv	Exportin-1	XPO1	O14980	CHEMBL5661	Unclassified protein	0.0489529	2 / 0聽聽聽聽聽
28.csv	11-beta-hydroxysteroid dehydrogenase 2	HSD11B2	P80365	CHEMBL3746	Enzyme	0.0489529	0 / 8聽聽聽聽聽
28.csv	Melatonin receptor 1A	MTNR1A	P48039	CHEMBL1945	Family A G protein-coupled receptor	0.0489529	41 / 0聽聽聽聽聽
28.csv	Melatonin receptor 1B	MTNR1B	P49286	CHEMBL1946	Family A G protein-coupled receptor	0.0489529	30 / 0聽聽聽聽聽
28.csv	Cytochrome P450 17A1	CYP17A1	P05093	CHEMBL3522	Cytochrome P450	0.0489529	46 / 7聽聽聽聽聽
28.csv	Interleukin-1 beta	IL1B	P01584	CHEMBL1909490	Secreted protein	0.0489529	0 / 2聽聽聽聽聽
28.csv	Cathepsin K	CTSK	P43235	CHEMBL268	Protease	0.0489529	56 / 0聽聽聽聽聽
28.csv	Mineralocorticoid receptor	NR3C2	P08235	CHEMBL1994	Nuclear receptor	0.0489529	2 / 16聽聽聽聽聽
28.csv	Aryl hydrocarbon receptor	AHR	P35869	CHEMBL3201	Transcription factor	0	1 / 0聽聽聽聽聽
28.csv	Subtilisin/kexin type 7	PCSK7	Q16549	CHEMBL2232	Protease	0	0 / 1聽聽聽聽聽
28.csv	GABA-A receptor; alpha-5/beta-3/gamma-2	GABRB3 GABRG2 GABRA5	P28472 P18507 P31644	CHEMBL2094122	Ligand-gated ion channel	0	31 / 0聽聽聽聽聽
28.csv	Proteinase-activated receptor 2	F2RL1	P55085	CHEMBL5963	Family A G protein-coupled receptor	0	0 / 1聽聽聽聽聽
28.csv	Serine/threonine protein phosphatase 2A, catalytic subunit, alpha isoform	PPP2CA	P67775	CHEMBL4703	Phosphatase	0	0 / 6聽聽聽聽聽
28.csv	Epoxide hydrolase 1	EPHX1	P07099	CHEMBL1968	Protease	0	35 / 0聽聽聽聽聽
28.csv	11-beta-hydroxysteroid dehydrogenase 1	HSD11B1	P28845	CHEMBL4235	Enzyme	0	72 / 19聽聽聽聽聽
28.csv	Leucine-rich repeat serine/threonine-protein kinase 2	LRRK2	Q5S007	CHEMBL1075104	Kinase	0	7 / 0聽聽聽聽聽
28.csv	Cathepsin L	CTSL	P07711	CHEMBL3837	Protease	0	23 / 0聽聽聽聽聽
28.csv	Cathepsin (B and K)	CTSB	P07858	CHEMBL4072	Protease	0	27 / 0聽聽聽聽聽
28.csv	Isoleucyl-tRNA synthetase	IARS	P41252	CHEMBL3235	Enzyme	0	0 / 1聽聽聽聽聽
28.csv	Neuronal acetylcholine receptor; alpha4/beta2	CHRNA4 CHRNB2	P43681 P17787	CHEMBL1907589	Ligand-gated ion channel	0	6 / 0聽聽聽聽聽
28.csv	Monoamine oxidase B	MAOB	P27338	CHEMBL2039	Oxidoreductase	0	87 / 0聽聽聽聽聽
28.csv	Adrenergic receptor alpha-2	ADRA2C	P18825	CHEMBL1916	Family A G protein-coupled receptor	0	4 / 0聽聽聽聽聽
28.csv	Inosine-5'-monophosphate dehydrogenase 2	IMPDH2	P12268	CHEMBL2002	Oxidoreductase	0	2 / 0聽聽聽聽聽
28.csv	Cholesterol esterase	CEL	P19835	CHEMBL3219	Enzyme	0	4 / 0聽聽聽聽聽
28.csv	Norepinephrine transporter	SLC6A2	P23975	CHEMBL222	Electrochemical transporter	0	21 / 0聽聽聽聽聽
28.csv	Estradiol 17-beta-dehydrogenase 3	HSD17B3	P37058	CHEMBL4234	Enzyme	0	17 / 0聽聽聽聽聽
28.csv	Matrix metalloproteinase 13	MMP13	P45452	CHEMBL280	Protease	0	5 / 0聽聽聽聽聽
28.csv	Matrix metalloproteinase 1	MMP1	P03956	CHEMBL332	Protease	0	3 / 0聽聽聽聽聽
28.csv	Vascular endothelial growth factor receptor 2	KDR	P35968	CHEMBL279	Kinase	0	11 / 0聽聽聽聽聽
28.csv	Tyrosine-protein kinase JAK1	JAK1	P23458	CHEMBL2835	Kinase	0	15 / 0聽聽聽聽聽
28.csv	Tyrosine-protein kinase JAK2	JAK2	O60674	CHEMBL2971	Kinase	0	23 / 0聽聽聽聽聽
28.csv	Kir3.1/Kir3.4	KCNJ5 KCNJ3	P48544 P48549	CHEMBL3038488	Voltage-gated ion channel	0	1 / 0聽聽聽聽聽
28.csv	Serine/threonine-protein kinase Aurora-A	AURKA	O14965	CHEMBL4722	Kinase	0	5 / 0聽聽聽聽聽
28.csv	Polyadenylate-binding protein 1	PABPC1	P11940	CHEMBL1293286	Unclassified protein	0	4 / 0聽聽聽聽聽
28.csv	Carbonic anhydrase II	CA2	P00918	CHEMBL205	Lyase	0	11 / 0聽聽聽聽聽
28.csv	Sigma opioid receptor	SIGMAR1	Q99720	CHEMBL287	Membrane receptor	0	4 / 0聽聽聽聽聽
28.csv	Glucocorticoid receptor	NR3C1	P04150	CHEMBL2034	Nuclear receptor	0	10 / 10聽聽聽聽聽
28.csv	MAP kinase p38 alpha	MAPK14	Q16539	CHEMBL260	Kinase	0	13 / 0聽聽聽聽聽
28.csv	NAD-dependent deacetylase sirtuin 2	SIRT2	Q8IXJ6	CHEMBL4462	Eraser	0	9 / 0聽聽聽聽聽
28.csv	Phospholipase A2 group IIA	PLA2G2A	P14555	CHEMBL3474	Enzyme	0	1 / 8聽聽聽聽聽
28.csv	Alcohol dehydrogenase gamma chain	ADH1C	P00326	CHEMBL3285	Oxidoreductase	0	5 / 0聽聽聽聽聽
28.csv	Tankyrase-2	TNKS2	Q9H2K2	CHEMBL6154	Enzyme	0	20 / 0聽聽聽聽聽
28.csv	Tankyrase-1	TNKS	O95271	CHEMBL6164	Enzyme	0	5 / 0聽聽聽聽聽
28.csv	Dopamine D4 receptor	DRD4	P21917	CHEMBL219	Family A G protein-coupled receptor	0	5 / 0聽聽聽聽聽
28.csv	Metabotropic glutamate receptor 5 (by homology)	GRM5	P41594	CHEMBL3227	Family C G protein-coupled receptor	0	37 / 0聽聽聽聽聽
28.csv	Cytochrome P450 2A6	CYP2A6	P11509	CHEMBL5282	Cytochrome P450	0	14 / 0聽聽聽聽聽
28.csv	Cyclooxygenase-2	PTGS2	P35354	CHEMBL230	Oxidoreductase	0	47 / 12聽聽聽聽聽
28.csv	Angiotensin-converting enzyme (by homology)	ACE	P12821	CHEMBL1808	Protease	0	4 / 0聽聽聽聽聽
28.csv	Glucagon receptor	GCGR	P47871	CHEMBL1985	Family B G protein-coupled receptor	0	3 / 0聽聽聽聽聽
28.csv	Quinone reductase 2	NQO2	P16083	CHEMBL3959	Enzyme	0	11 / 0聽聽聽聽聽
28.csv	Protein-tyrosine phosphatase 2C	PTPN11	Q06124	CHEMBL3864	Phosphatase	0	0 / 2聽聽聽聽聽
28.csv	Phosphodiesterase 7A	PDE7A	Q13946	CHEMBL3012	Phosphodiesterase	0	34 / 0聽聽聽聽聽
28.csv	Glycogen synthase kinase-3 beta	GSK3B	P49841	CHEMBL262	Kinase	0	35 / 3聽聽聽聽聽
28.csv	Apoptosis regulator Bcl-X	BCL2L1	Q07817	CHEMBL4625	Other ion channel	0	0 / 3聽聽聽聽聽
28.csv	PI3-kinase p110-delta/p85-alpha	PIK3CD PIK3R1	O00329 P27986	CHEMBL2111432	Enzyme	0	1 / 0聽聽聽聽聽
28.csv	Interleukin-8 receptor A	CXCR1	P25024	CHEMBL4029	Family A G protein-coupled receptor	0	0 / 2聽聽聽聽聽
28.csv	GABA-A receptor; alpha-3/beta-3/gamma-2	GABRB3 GABRA3 GABRG2	P28472 P34903 P18507	CHEMBL2094120	Ligand-gated ion channel	0	7 / 0聽聽聽聽聽
28.csv	GABA-A receptor; alpha-1/beta-3/gamma-2	GABRB3 GABRG2 GABRA1	P28472 P18507 P14867	CHEMBL2094121	Ligand-gated ion channel	0	6 / 0聽聽聽聽聽
28.csv	GABA-A receptor; alpha-2/beta-3/gamma-2	GABRA2 GABRB3 GABRG2	P47869 P28472 P18507	CHEMBL2094130	Ligand-gated ion channel	0	7 / 0聽聽聽聽聽
29.csv	Cytochrome P450 19A1	CYP19A1	P11511	CHEMBL1978	Cytochrome P450	0.0489529	167 / 29聽聽聽聽聽
29.csv	Thromboxane-A synthase	TBXAS1	P24557	CHEMBL1835	Cytochrome P450	0.0489529	16 / 0聽聽聽聽聽
29.csv	Epoxide hydrolase 1	EPHX1	P07099	CHEMBL1968	Protease	0.0489529	37 / 0聽聽聽聽聽
29.csv	Androgen Receptor	AR	P10275	CHEMBL1871	Nuclear receptor	0.0489529	29 / 55聽聽聽聽聽
29.csv	Progesterone receptor	PGR	P06401	CHEMBL208	Nuclear receptor	0.0489529	18 / 40聽聽聽聽聽
29.csv	Cytochrome P450 11B2	CYP11B2	P19099	CHEMBL2722	Cytochrome P450	0.0489529	116 / 0聽聽聽聽聽
29.csv	Cytochrome P450 11B1	CYP11B1	P15538	CHEMBL1908	Cytochrome P450	0.0489529	93 / 0聽聽聽聽聽
29.csv	Tyrosine-protein kinase receptor FLT3	FLT3	P36888	CHEMBL1974	Kinase	0.0489529	5 / 0聽聽聽聽聽
29.csv	DNA-dependent protein kinase	PRKDC	P78527	CHEMBL3142	Kinase	0.0489529	1 / 0聽聽聽聽聽
29.csv	Kinesin-like protein 1	KIF11	P52732	CHEMBL4581	Other cytosolic protein	0.0489529	3 / 0聽聽聽聽聽
29.csv	Adrenergic receptor alpha-2	ADRA2C	P18825	CHEMBL1916	Family A G protein-coupled receptor	0.0489529	8 / 0聽聽聽聽聽
29.csv	Cathepsin K	CTSK	P43235	CHEMBL268	Protease	0.0489529	50 / 0聽聽聽聽聽
29.csv	Carbonic anhydrase III	CA3	P07451	CHEMBL2885	Lyase	0.0489529	4 / 0聽聽聽聽聽
29.csv	Carbonic anhydrase XII	CA12	O43570	CHEMBL3242	Lyase	0.0489529	13 / 0聽聽聽聽聽
29.csv	Carbonic anhydrase XIV	CA14	Q9ULX7	CHEMBL3510	Lyase	0.0489529	6 / 0聽聽聽聽聽
29.csv	Carbonic anhydrase IX	CA9	Q16790	CHEMBL3594	Lyase	0.0489529	11 / 0聽聽聽聽聽
29.csv	Carbonic anhydrase XIII (by homology)	CA13	Q8N1Q1	CHEMBL3912	Lyase	0.0489529	6 / 0聽聽聽聽聽
29.csv	Carbonic anhydrase VB	CA5B	Q9Y2D0	CHEMBL3969	Lyase	0.0489529	5 / 0聽聽聽聽聽
29.csv	Carbonic anhydrase VA	CA5A	P35218	CHEMBL4789	Lyase	0.0489529	5 / 0聽聽聽聽聽
29.csv	Cholesterol esterase	CEL	P19835	CHEMBL3219	Enzyme	0.0489529	4 / 0聽聽聽聽聽
29.csv	Thromboxane A2 receptor	TBXA2R	P21731	CHEMBL2069	Family A G protein-coupled receptor	0.0489529	3 / 0聽聽聽聽聽
29.csv	Exportin-1	XPO1	O14980	CHEMBL5661	Unclassified protein	0.0489529	2 / 0聽聽聽聽聽
29.csv	Potassium channel subfamily K member 2 (by homology)	KCNK2	O95069	CHEMBL2321615	Voltage-gated ion channel	0.0489529	1 / 0聽聽聽聽聽
29.csv	Tubulin--tyrosine ligase	TTL	Q8NG68	CHEMBL5549	Enzyme	0.0489529	0 / 17聽聽聽聽聽
29.csv	Muscarinic acetylcholine receptor M4	CHRM4	P08173	CHEMBL1821	Family A G protein-coupled receptor	0.0489529	6 / 0聽聽聽聽聽
29.csv	Muscarinic acetylcholine receptor M5	CHRM5	P08912	CHEMBL2035	Family A G protein-coupled receptor	0.0489529	7 / 0聽聽聽聽聽
29.csv	Muscarinic acetylcholine receptor M2	CHRM2	P08172	CHEMBL211	Family A G protein-coupled receptor	0.0489529	23 / 0聽聽聽聽聽
29.csv	Muscarinic acetylcholine receptor M1	CHRM1	P11229	CHEMBL216	Family A G protein-coupled receptor	0.0489529	26 / 0聽聽聽聽聽
29.csv	Muscarinic acetylcholine receptor M3	CHRM3	P20309	CHEMBL245	Family A G protein-coupled receptor	0.0489529	10 / 0聽聽聽聽聽
29.csv	Leucine-rich repeat serine/threonine-protein kinase 2	LRRK2	Q5S007	CHEMBL1075104	Kinase	0.0489529	7 / 0聽聽聽聽聽
29.csv	Kir3.1/Kir3.4	KCNJ5 KCNJ3	P48544 P48549	CHEMBL3038488	Voltage-gated ion channel	0	1 / 0聽聽聽聽聽
29.csv	Thymidylate synthase	TYMS	P04818	CHEMBL1952	Transferase	0	5 / 0聽聽聽聽聽
29.csv	Leukocyte elastase	ELANE	P08246	CHEMBL248	Protease	0	10 / 0聽聽聽聽聽
29.csv	Poly [ADP-ribose] polymerase-1	PARP1	P09874	CHEMBL3105	Enzyme	0	22 / 0聽聽聽聽聽
29.csv	Epoxide hydratase	EPHX2	P34913	CHEMBL2409	Protease	0	28 / 0聽聽聽聽聽
29.csv	Leukocyte common antigen	PTPRC	P08575	CHEMBL3243	Enzyme	0	4 / 0聽聽聽聽聽
29.csv	Receptor-type tyrosine-protein phosphatase F (LAR)	PTPRF	P10586	CHEMBL3521	Membrane receptor	0	2 / 0聽聽聽聽聽
29.csv	Monoamine oxidase B	MAOB	P27338	CHEMBL2039	Oxidoreductase	0	66 / 0聽聽聽聽聽
29.csv	MAP kinase p38 alpha	MAPK14	Q16539	CHEMBL260	Kinase	0	14 / 0聽聽聽聽聽
29.csv	Myeloperoxidase	MPO	P05164	CHEMBL2439	Enzyme	0	6 / 0聽聽聽聽聽
29.csv	Polyadenylate-binding protein 1	PABPC1	P11940	CHEMBL1293286	Unclassified protein	0	4 / 0聽聽聽聽聽
29.csv	Steroid 5-alpha-reductase 1	SRD5A1	P18405	CHEMBL1787	Oxidoreductase	0	56 / 0聽聽聽聽聽
29.csv	Estradiol 17-beta-dehydrogenase 3	HSD17B3	P37058	CHEMBL4234	Enzyme	0	17 / 0聽聽聽聽聽
29.csv	Alcohol dehydrogenase alpha chain	ADH1A	P07327	CHEMBL1970	Oxidoreductase	0	10 / 0聽聽聽聽聽
29.csv	PI3-kinase p110-delta/p85-alpha	PIK3CD PIK3R1	O00329 P27986	CHEMBL2111432	Enzyme	0	1 / 0聽聽聽聽聽
29.csv	Aryl hydrocarbon receptor	AHR	P35869	CHEMBL3201	Transcription factor	0	1 / 0聽聽聽聽聽
29.csv	Melatonin receptor 1A	MTNR1A	P48039	CHEMBL1945	Family A G protein-coupled receptor	0	23 / 0聽聽聽聽聽
29.csv	Melatonin receptor 1B	MTNR1B	P49286	CHEMBL1946	Family A G protein-coupled receptor	0	17 / 0聽聽聽聽聽
29.csv	Dopamine D4 receptor	DRD4	P21917	CHEMBL219	Family A G protein-coupled receptor	0	4 / 0聽聽聽聽聽
29.csv	Vascular endothelial growth factor receptor 2	KDR	P35968	CHEMBL279	Kinase	0	7 / 0聽聽聽聽聽
29.csv	Tyrosine-protein kinase JAK1	JAK1	P23458	CHEMBL2835	Kinase	0	15 / 0聽聽聽聽聽
29.csv	Tyrosine-protein kinase JAK2	JAK2	O60674	CHEMBL2971	Kinase	0	22 / 0聽聽聽聽聽
29.csv	Metabotropic glutamate receptor 5 (by homology)	GRM5	P41594	CHEMBL3227	Family C G protein-coupled receptor	0	36 / 0聽聽聽聽聽
29.csv	Serine/threonine-protein kinase Aurora-A	AURKA	O14965	CHEMBL4722	Kinase	0	4 / 0聽聽聽聽聽
29.csv	Tankyrase-2	TNKS2	Q9H2K2	CHEMBL6154	Enzyme	0	19 / 0聽聽聽聽聽
29.csv	Tankyrase-1	TNKS	O95271	CHEMBL6164	Enzyme	0	5 / 0聽聽聽聽聽
29.csv	RAS guanyl releasing protein 3	RASGRP3	Q8IV61	CHEMBL3638	Other cytosolic protein	0	0 / 1聽聽聽聽聽
29.csv	Acetylcholinesterase	ACHE	P22303	CHEMBL220	Hydrolase	0	23 / 0聽聽聽聽聽
29.csv	Geranylgeranyl transferase type I	PGGT1B FNTA	P53609 P49354	CHEMBL2095164	Enzyme	0	5 / 0聽聽聽聽聽
29.csv	Tyrosine-protein kinase JAK3	JAK3	P52333	CHEMBL2148	Kinase	0	12 / 0聽聽聽聽聽
29.csv	Beta-chymotrypsin	CTRB1	P17538	CHEMBL4796	Protease	0	4 / 0聽聽聽聽聽
29.csv	Cytochrome P450 2A6	CYP2A6	P11509	CHEMBL5282	Cytochrome P450	0	12 / 0聽聽聽聽聽
29.csv	Serotonin 2b (5-HT2b) receptor	HTR2B	P41595	CHEMBL1833	Family A G protein-coupled receptor	0	4 / 0聽聽聽聽聽
29.csv	Tyrosine-protein kinase FYN	FYN	P06241	CHEMBL1841	Kinase	0	1 / 0聽聽聽聽聽
29.csv	Alpha-2a adrenergic receptor	ADRA2A	P08913	CHEMBL1867	Family A G protein-coupled receptor	0	7 / 0聽聽聽聽聽
29.csv	Alpha-2b adrenergic receptor	ADRA2B	P18089	CHEMBL1942	Family A G protein-coupled receptor	0	6 / 0聽聽聽聽聽
29.csv	Bile acid receptor FXR	NR1H4	Q96RI1	CHEMBL2047	Nuclear receptor	0	1 / 0聽聽聽聽聽
29.csv	Thrombin	F2	P00734	CHEMBL204	Protease	0	8 / 0聽聽聽聽聽
29.csv	Trypsin I	PRSS1	P07477	CHEMBL209	Protease	0	7 / 0聽聽聽聽聽
29.csv	Serotonin 2a (5-HT2a) receptor	HTR2A	P28223	CHEMBL224	Family A G protein-coupled receptor	0	3 / 0聽聽聽聽聽
29.csv	Serotonin 2c (5-HT2c) receptor	HTR2C	P28335	CHEMBL225	Family A G protein-coupled receptor	0	4 / 0聽聽聽聽聽
29.csv	Serotonin transporter	SLC6A4	P31645	CHEMBL228	Electrochemical transporter	0	14 / 0聽聽聽聽聽
29.csv	Dopamine D3 receptor	DRD3	P35462	CHEMBL234	Family A G protein-coupled receptor	0	2 / 0聽聽聽聽聽
29.csv	Adenosine A3 receptor	ADORA3	P0DMS8	CHEMBL256	Family A G protein-coupled receptor	0	2 / 0聽聽聽聽聽
29.csv	Cytochrome P450 2D6	CYP2D6	P10635	CHEMBL289	Cytochrome P450	0	2 / 0聽聽聽聽聽
29.csv	Cytochrome P450 1A2	CYP1A2	P05177	CHEMBL3356	Cytochrome P450	0	3 / 0聽聽聽聽聽
29.csv	Cytochrome P450 2C9	CYP2C9	P11712	CHEMBL3397	Cytochrome P450	0	1 / 0聽聽聽聽聽
29.csv	Cytochrome P450 3A4	CYP3A4	P08684	CHEMBL340	Cytochrome P450	0	1 / 0聽聽聽聽聽
29.csv	Indoleamine 2,3-dioxygenase	IDO1	P14902	CHEMBL4685	Enzyme	0	11 / 0聽聽聽聽聽
29.csv	Histone acetyltransferase PCAF	KAT2B	Q92831	CHEMBL5500	Writer	0	2 / 0聽聽聽聽聽
29.csv	GABA-A receptor; alpha-5/beta-3/gamma-2	GABRB3 GABRG2 GABRA5	P28472 P18507 P31644	CHEMBL2094122	Ligand-gated ion channel	0	33 / 0聽聽聽聽聽
29.csv	G-protein coupled receptor 55	GPR55	Q9Y2T6	CHEMBL1075322	Family A G protein-coupled receptor	0	1 / 0聽聽聽聽聽
29.csv	Cyclooxygenase-1	PTGS1	P23219	CHEMBL221	Oxidoreductase	0	21 / 0聽聽聽聽聽
29.csv	Cathepsin (H and K)	CTSH	P09668	CHEMBL2225	Protease	0	5 / 0聽聽聽聽聽
29.csv	Cathepsin L	CTSL	P07711	CHEMBL3837	Protease	0	24 / 0聽聽聽聽聽
29.csv	Cathepsin (B and K)	CTSB	P07858	CHEMBL4072	Protease	0	25 / 0聽聽聽聽聽
29.csv	Protein-tyrosine phosphatase 1B	PTPN1	P18031	CHEMBL335	Phosphatase	0	7 / 10聽聽聽聽聽
29.csv	Signal transducer and activator of transcription 3	STAT3	P40763	CHEMBL4026	Transcription factor	0	1 / 11聽聽聽聽聽
29.csv	Macrophage-stimulating protein receptor	MST1R	Q04912	CHEMBL2689	Kinase	0	1 / 0聽聽聽聽聽
29.csv	Heme oxygenase 1 (by homology)	HMOX1	P09601	CHEMBL2823	Enzyme	0	6 / 0聽聽聽聽聽
29.csv	Cytochrome P450 17A1	CYP17A1	P05093	CHEMBL3522	Cytochrome P450	0	46 / 4聽聽聽聽聽
29.csv	Phosphodiesterase 7A	PDE7A	Q13946	CHEMBL3012	Phosphodiesterase	0	31 / 0聽聽聽聽聽
29.csv	Neuronal acetylcholine receptor; alpha4/beta2	CHRNA4 CHRNB2	P43681 P17787	CHEMBL1907589	Ligand-gated ion channel	0	4 / 0聽聽聽聽聽
29.csv	Glutaminyl-peptide cyclotransferase	QPCT	Q16769	CHEMBL4508	Enzyme	0	5 / 0聽聽聽聽聽
29.csv	Metabotropic glutamate receptor 2 (by homology)	GRM2	Q14416	CHEMBL5137	Family C G protein-coupled receptor	0	5 / 0聽聽聽聽聽
29.csv	Platelet-derived growth factor receptor	PDGFRA PDGFRB	P16234 P09619	CHEMBL2095189	Kinase	0	7 / 0聽聽聽聽聽
29.csv	Chymotrypsin C	CTRC	Q99895	CHEMBL2386	Protease	0	3 / 0聽聽聽聽聽
29.csv	Metabotropic glutamate receptor 4	GRM4	Q14833	CHEMBL2736	Family C G protein-coupled receptor	0	6 / 0聽聽聽聽聽
29.csv	Bromodomain-containing protein 9	BRD9	Q9H8M2	CHEMBL3108640	Reader	0	1 / 0聽聽聽聽聽
29.csv	Alcohol dehydrogenase gamma chain	ADH1C	P00326	CHEMBL3285	Oxidoreductase	0	3 / 0聽聽聽聽聽
3.csv	Histone deacetylase 3	HDAC3	O15379	CHEMBL1829	Eraser	0.105844	0 / 1聽聽聽聽聽
3.csv	Egl nine homolog 1	EGLN1	Q9GZT9	CHEMBL5697	Oxidoreductase	0.0339707	0 / 2聽聽聽聽聽
3.csv	Carbonic anhydrase II	CA2	P00918	CHEMBL205	Lyase	0.0238327	9 / 0聽聽聽聽聽
3.csv	Carbonic anhydrase I	CA1	P00915	CHEMBL261	Lyase	0.0238327	8 / 0聽聽聽聽聽
3.csv	D-amino-acid oxidase	DAO	P14920	CHEMBL5485	Enzyme	0	2 / 0聽聽聽聽聽
3.csv	Hydroxycarboxylic acid receptor 2	HCAR2	Q8TDS4	CHEMBL3785	Family A G protein-coupled receptor	0	3 / 0聽聽聽聽聽
3.csv	GABA transporter 1	SLC6A1	P30531	CHEMBL1903	Electrochemical transporter	0	0 / 1聽聽聽聽聽
3.csv	GABA-A receptor; alpha-1/beta-2/gamma-2	GABRA1 GABRB2 GABRG2	P14867 P47870 P18507	CHEMBL2095172	Ligand-gated ion channel	0	0 / 1聽聽聽聽聽
3.csv	GABA A receptor alpha-3/beta-2/gamma-2	GABRA3 GABRB2 GABRG2	P34903 P47870 P18507	CHEMBL2111339	Ligand-gated ion channel	0	0 / 1聽聽聽聽聽
3.csv	GABA A receptor alpha-2/beta-2/gamma-2	GABRA2 GABRB2 GABRG2	P47869 P47870 P18507	CHEMBL2111413	Ligand-gated ion channel	0	0 / 2聽聽聽聽聽
3.csv	GABA-B receptor	GABBR2 GABBR1	O75899 Q9UBS5	CHEMBL2111463	Family C G protein-coupled receptor	0	0 / 1聽聽聽聽聽
3.csv	GABA receptor rho-1 subunit	GABRR1	P24046	CHEMBL3561	Ligand-gated ion channel	0	0 / 1聽聽聽聽聽
3.csv	GABA transporter 3	SLC6A11	P48066	CHEMBL5208	Electrochemical transporter	0	0 / 1聽聽聽聽聽
3.csv	GABA transporter 2 (by homology)	SLC6A13	Q9NSD5	CHEMBL4535	Electrochemical transporter	0	0 / 1聽聽聽聽聽
3.csv	Hydroxyacid oxidase 1	HAO1	Q9UJM8	CHEMBL4229	Enzyme	0	0 / 1聽聽聽聽聽
3.csv	Alpha-L-fucosidase I	FUCA1	P04066	CHEMBL4176	Enzyme	0	1 / 0聽聽聽聽聽
3.csv	Fatty acid binding protein adipocyte	FABP4	P15090	CHEMBL2083	Fatty acid binding protein family	0	0 / 1聽聽聽聽聽
3.csv	Peroxisome proliferator-activated receptor alpha	PPARA	Q07869	CHEMBL239	Nuclear receptor	0	0 / 3聽聽聽聽聽
3.csv	Fatty acid binding protein muscle	FABP3	P05413	CHEMBL3344	Fatty acid binding protein family	0	0 / 1聽聽聽聽聽
3.csv	Fatty acid binding protein epidermal	FABP5	Q01469	CHEMBL3674	Fatty acid binding protein family	0	0 / 1聽聽聽聽聽
3.csv	Peroxisome proliferator-activated receptor delta	PPARD	Q03181	CHEMBL3979	Nuclear receptor	0	0 / 2聽聽聽聽聽
3.csv	Free fatty acid receptor 1	FFAR1	O14842	CHEMBL4422	Family A G protein-coupled receptor	0	0 / 1聽聽聽聽聽
3.csv	Fatty acid binding protein intestinal	FABP2	P12104	CHEMBL4879	Fatty acid binding protein family	0	0 / 1聽聽聽聽聽
3.csv	Ribonuclease H1	RNASEH1	O60930	CHEMBL5893	Enzyme	0	1 / 0聽聽聽聽聽
3.csv	Aldose reductase	AKR1B1	P15121	CHEMBL1900	Enzyme	0	0 / 1聽聽聽聽聽
3.csv	HMG-CoA reductase	HMGCR	P04035	CHEMBL402	Oxidoreductase	0	0 / 1聽聽聽聽聽
3.csv	11-beta-hydroxysteroid dehydrogenase 1	HSD11B1	P28845	CHEMBL4235	Enzyme	0	0 / 3聽聽聽聽聽
3.csv	Serine/threonine-protein kinase PIM1	PIM1	P11309	CHEMBL2147	Kinase	0	2 / 0聽聽聽聽聽
3.csv	Tyrosine-protein kinase FYN	FYN	P06241	CHEMBL1841	Kinase	0	1 / 0聽聽聽聽聽
[truncated: 5,596 more rows]

## Sheet: 去重靶标
SLC6A1
GABRA1
GABRA3
GABRA2
GABBR2
GABRR1
SLC6A11
SLC6A13
SLC6A12
GRIK1
GRIA1
GRIK5
SLC1A1
GRM4
GRIA4
GRM5
GRM8
GRIK2
GRIK3
GRM1
GRM7
GRIA2
HDAC3
BBOX1
ABAT
CPT2
KDM4E
KDM2A
KDM6B
PHF8
KDM5C
EGLN1
GRM3
GRM2
GABBR1
GRM6
ADORA3
ANPEP
ENPEP
PLG
LTA4H
SLC1A2
CACNA2D1
LAP3
MMP2
SHBG
CA2
CA1
CA12
CA9
KDM7A
AR
CDC45
PTPRC
CDC25A
SLC22A6
CPB2
PEPD
HSD11B1
FABP4
PPARA
FABP3
FABP5
PPARD
FFAR1
FABP2
HMGCR
RNPEP
CPA1
ODC1
ACLY
CHRNA7
FDFT1
AKR1B1
HAO1
PTGER2
PTGFR
FNTA
NPC1L1
UGT2B7
CPT1A
G6PD
HCAR2
DDO
MMP9
SIRT3
SIRT2
MMP3
MMP1
IMPDH2
PTPN1
CHRM1
P4HA1
P4HTM
MMP8
PLK1
SLC22A12
CYP2A6
CNR1
CNR2
KDM4A
KDM4D
KDM4C
PARP1
PABPC1
PTK2B
HAAO
PIM1
PIM2
PIM3
CHRM2
ACHE
NR4A1
FAAH
ADRA1D
CYP19A1
CYP11B2
CCR2
CHRNA4
CHRNA3
HDAC8
HDAC1
IKBKB
NOS1
NOS3
NOS2
KIT
PDGFRA
FGFR3
FGFR1
ERN1
MAOA
FDPS
CYP11B1
CYP3A4
CYP17A1
RAF1
EPHX1
EPHX2
JAK2
CHEK1
SIGMAR1
SCARB1
CHAT
DHFR
CYP51A1
FUCA1
NR1H4
GPBAR1
PTGDR2
VDR
AKR1B10
POLB
ACE
MGAM
SI
DPP4
UGCG
FBP1
KMO
CASP3
SERPINA6
HSD17B3
GBA
GLA
PTGES
GAA
GANC
HSD11B2
GANAB
SLC13A5
PYGL
GBA2
AGL
GLB1
FUCA2
AHCY
GSTK1
GPR17
CA3
CA14
CA5B
CA13
ECE1
MME
EGFR
MAN1B1
CA6
CA7
CA4
LDHA
LDHB
CA5A
ALB
COMT
BCL2L1
SQLE
AKR1C3
GPR35
FUT7
TTR
IGF1R
ALK
HDAC6
TYR
ESR2
AKR1C2
AKR1C1
MCL1
SERPINE1
PTPRB
AURKB
SRC
PTK2
KDR
MET
NEK2
AXL
TYMS
PTGS1
PTGS2
PTPN2
SRD5A2
SAE1
EP300
KAT2B
RARG
RARB
DYRK1A
CLK1
DYRK1B
OGA
FYN
LCK
CTBP2
MAOB
TUBB1
TLR4
FASN
DAO
ESR1
KDM3A
CDA
PIN1
SLC6A3
ATIC
ALOX12
HSP90AA1
IDO1
ADRA2A
ADRA2C
ADRB2
DRD2
ADRA1A
ADRA2B
ADRB1
MPO
MIF
ALOX5
FTO
F3
TPMT
TRPA1
NGFR
PGR
GSK3B
TLR9
ERBB2
SLC6A2
MAPK1
AKR1C4
NQO2
SLC16A1
APP
PIK3CB
CYP1A2
CYP2C9
CYP2C19
PIK3CA
RELA
ELANE
SYK
CAPN2
CAPN1
EEF2K
PRKCQ
PTGER4
PTGER3
NFE2L2
STAT3
PRMT1
EIF2AK2
FOLH1
ALDH2
ALPL
HSD17B2
HSD17B1
CCND1
DBF4
PLA2G2D
CES1
CES2
WDR5
SLC7A11
RARA
SLC6A4
KDM5A
EGLN2
KDM5B
EGLN3
HIF1AN
RXRB
RXRG
RXRA
CDC25B
PLA2G7
PLEC
PRKCD
PRKCA
DHODH
PLAU
PHLPP2
OPRD1
POLA1
PLA2G4B
LIG1
SLC29A1
DTYMK
APEX1
ADA
AMPD3
TRPM8
NAALAD2
ITGAL
GGH
TBXAS1
ST14
ERCC5
FEN1
TNNC1
RPS6KA3
PLK3
BTK
KCNMA1
HTR2A
MAPK14
METAP2
CTSB
TUBB3
ABCB1
RNASEH1
ABCG2
MAPK3
BCL2
MTNR1A
CYP1B1
MAP2K1
F2
AHR
BAD
PSMB5
CALM1
ALDH1A1
CTSD
MCHR1
PDE4D
STS
CYP1A1
ROCK2
NFKB1
NQO1
HTR2C
ADORA2A
XDH
CBR1
KCNA5
KCNA3
CTSA
PDGFRB
FLT4
INSR
CDK2
CSNK2A1
PLK4
TEK
AKT1
AURKA
BACE1
MAP3K8
BRAF
EPHB4
HSPA1A
NUAK1
FGR
LYN
DRD4
GSR
GPR55
SRD5A1
XPO1
TBXA2R
BCHE
SLC16A3
HTR2B
TNKS
GRK6
ADORA1
PTGER1
PTGDR
PON1
RORC
RORA
NR1H3
PPARG
SREBF2
NR1I3
PTGIR
LTB4R
TK1
CDK9
SPHK2
SPHK1
ADK
PYGM
AHCYL1
HAO2
TDP1
GLRA2
TNF
GSTP1
GSTM2
KMT5A
PGD
NAT1
MB
ALPG
PLAA
AOC3
CISD1
CSNK1A1
CSNK1D
ALDH5A1
CXCR1
PIK3CG
PNP
TAAR1
TERT
JAK1
TYK2
WEE1
ALOX15
PRKCE
REN
TOP2A
GLO1
CTNNB1
IKBKG
MAPK8
EDNRA
MAPT
NOX4
ADORA2B
DYRK2
P2RX3
MPI
YWHAG
NOTUM
TAS1R3
MAPK10
ACE2
MMP12
GSTA1
CSNK2A2
CPA3
OXER1
PARP2
IDE
PPM1B
ITGAV
PPP1CC
KDM4B
GRK2
BCAT2
CREBBP
CCNC
PDE5A
PDE9A
CPB1
PARP15
PARP10
PLA2G2A
SLCO1B1
SORT1
AKR1A1
THRB
DUSP3
CPN1
CXCR2
PPP5C
PPP1CA
CASP1
ATP12A
TTL
RPS6KA5
TAS2R31
PDCD4
PLA2G1B
CDC25C
RASGRP3
CHRM4
CHRM5
CHRM3
FLT3
KIF11
ADH1A
PRKDC
KCNK2
PTPRF
MTNR1B
IL1B
CTSK
NR3C2
PCSK7
GABRB3
F2RL1
PPP2CA
LRRK2
CTSL
IARS
CEL
MMP13
KCNJ5
NR3C1
ADH1C
TNKS2
GCGR
PTPN11
PDE7A
PIK3CD
PGGT1B
JAK3
CTRB1
PRSS1
DRD3
CYP2D6
CTSH
MST1R
HMOX1
QPCT
CTRC
BRD9
UPP1
DCTPP1
FADS1
P2RX7
HCRTR2
HCRTR1
CCKBR
PSEN2
MDM2
CCNE2
GSK3A
PDE10A
CCNE1
CDC7
ATP1A1
IMPDH1
MAPKAPK2
CSNK1G1
PDE2A
CASR
KCNK3
KCNK9
C5AR1
CCNB3
KCNH2
CDK5
RPS6KA1
ROCK1
RPS6KB1
FLT1
TXK
LIPE
SLC27A4
TRPV3
SNCA
PDPK1
HSD17B14
ABCC1
GLI2
GLI1
ABL1
ESRRB
TOP1
VCP
HPGDS
ALOX5AP
ADCY5
PDK1
CDK1
DNM1
HDAC5
ADAM17
IGFBP3
CDK4
CXCR4
MAP4K4
CHEK2
BMP1
PRMT6
PRMT8
KLKB1
AADAT
PFKFB3
ZAP70
CHUK
QDPR
CAMK2D
MKNK2
AKT3
PBK
PRKCB
IRAK1
IRAK4
MELK
BRD4
ATAD2
HTR4
FRK
PTK6
EPHA1
HRH4
KARS
NEK1
TGM2
DPP8
DPP9
MAP3K5
MTOR
MAPK9
NPY1R
HCK
IL2
PTPRS
ESRRA
RET
EZR
DRD1
EPHB2
KDM1A
SLC9A1
NCOR2
HDAC11
HDAC10
PDE4A
PDE4B
PDE4C
PI4KB
RPS6KA2
MARK1
MMP25
MMP16
MMP14
CDK5R1
CDK6
CFTR
CD38
ARG1
AMY1A
NAE1
DAPK1
MPG
ST6GAL1
AVPR2
PIK3R1
PKN1
CAMK2B
NEK6
ADRA1B
SGK1
PRKCZ
HDAC7
HDAC9
SLC5A1
DRD5
HTR3A
HTR1A
THRA
RAC1
DNMT1
STAT1
ATP4B
SLC5A2
PLA2G5
PLA2G10
KLK1
KLK2
PGF
VEGFA
HNF4A
MGLL
ACACB
HPGD
DCK
ACACA
POLM
POLK
POLL
POLH
MGAT2
DUT
DGAT2
PTAFR
AGTR1
F2R
CALCRL
SOAT1
CALCA
PORCN
CTSS
PTPN13
SMO
FKBP1A
PLAT
F10
SIRT1
GRK1
GRK5
OPRK1
PLA2G4A
LIMK1
LIMK2
DGAT1
KCNJ1
NAMPT
CCR1
CCR5
CCR8
BCL2A1
TDO2
MAP3K11
MAP3K9
HTR6
BIRC5
HPRT1
GRIN1
GRIN2A
MYLK
PRKACA
CYP24A1
EPHA2
YES1
BLK
CSK
BMX
EPHA5
EPHA4
EPHA6
EPHB3
EPHA3
TYRO3
COQ8B
HSP90AB1
TAOK1
TAOK3
MAP4K2
ASAH1
RIPK2
HDAC2
HSP90B1
IGFBP6
IGFBP4
IGFBP5
IGFBP2
IGFBP1
CRHR1
HSPA8
CCR4
NTRK1
PTP4A3
GRIN2B
GPR84
GUSB
CDK7
NTRK2
OPRM1
HRH3
ICAM1
SELE
EDNRB
CLK4
CASP9
CASP7
CLK3
TDP2
TAB1
SCN9A
CSNK1E
CCR9
PDE8B
BRD2
BRD3
CSF1R
KLK7
VCAM1
ABCC9
CLK2
HTR7
HTR5A
PTPRCAP
HTR1D
HTR1B
HRH2
TH
TSPO
CHRNB3
HTR1F
HTR1E
SCN4A
XIAP
BIRC2
CHRNB1
SSTR4
SSTR1
HASPIN
MERTK
FAP
PTPRA
SF3B3
NCOR1
CFD
MMP7
MMP15
MMP26
DHCR7
RBBP9
KCNN1
KCNN3
KCNN2
ADRB3
SLC18A2
SLC47A1
CHRNB4
DPP7
JUN
PDE1A
HRH1
PREP
LGALS3
LGALS9
TYMP
FGF1
FGF2
HPSE
TREH
HSPA5
GAPDH
HK2
HK1
TP53
PRKCG
PRKCH
SSTR5
SSTR2
SSTR3
AMY2A
HRAS
SLC28A3
BMP4
MPEG1
TRPV1
S1PR3
S1PR1
IKBKE
TBK1
STK17B
AVPR1A
SCD
ADAMTS5
NEU4
SLC37A4
CASP6
CASP8
CASP2
ENGASE
DNMT3B
LYPLA1
LYPLA2
NR1H2
NEU2
CAMKK2
ITGB1
HDAC4
MDM4
GNRHR
ITK
NAAA
ADAM10
TACR3
NPY5R
PTPN6
TTK
CCNA2
ITGA2B
DNPEP
PSEN1
PI4KA
GIPR
METAP1
CPT1B
P2RY12
ICMT
CYSLTR1
CYSLTR2
GCG
USP1
OXTR
FPR1
GYS1
CCKAR
PLA2G2C
MMP10
GLP1R
ADAMTS4
PAOX
SOAT2
ITGA4
ITGB7
ACP1
HLA-A
PDE1B
PTPN22
YARS
TMPRSS15
NEU3
P2RY1
SELP
FPGS
SELL
NRP1
KMT2A
DOT1L
SUV39H1
INMT
SMYD2
EZH2
EZH1
SETDB1
ASNS
CARM1
ILK
STAT6
TNNI3K
DAGLA
SLC5A4
GNPAT
EHMT1
EHMT2
POLD1
SETD7
GFPT1
PRMT5
NNMT
PRMT3
IDH1
PSMG3
KISS1R
DNASE1L3
CNOT7
CTSC
KYAT3
TACR1
TAAR5
AOC1
PKN2
PRKD1
PRKCI
ADCYAP1R1
DNM2
GRK7
HIPK4
TAOK2
TGFBR1
ACVR1
ME1
AKT2
BACE2
PRF1
CMA1
PDE3A
PDE3B
NISCH
TLR8
SLC28A2
MGMT
SLC5A11
PPP2R5A
MANBA
PITRM1
GABRA5
GRPR
BDKRB1
C3AR1
EPHA8
EPHA7
EPHB1
FGFR2
MARK2
UTS2R
TSHR
LIPC
GHSR
SLC6A5
TACR2
F7
F11
PROC
CCR3
LNPEP
NMUR2
LSS
LGALS4
LGALS8
RARS
SCN5A
SCN2A
NADK
SLC2A1
EIF4A1
SLC10A2
CHIA
MARS
QARS
CD274
LCT
TK2
GBA3
NRAS
FOLR1
GART
F9
RPS6KB2
PRKD2
GABRB2
FNTB
CHRNB2
TNNT2
CCNA1
CCNT1
TAS1R1
CDK8
UBA2
GABRG2
KCNJ3
PSENEN
CCNB1
CDK3
ATP4A
MAP3K7
CHRNA6
CHRNA1
CHRNA2
ITGB3
ITGB6
ITGA5
ITGB2
TNNI3
NCSTN
CHRNG
APH1A
CCNB2
CHRND
APH1B
