# Supplementary material for: A Network Pharmacology-Based Study on Irritable Bowel Syndrome Prevention and Treatment Utilizing Shenling Baizhu Powder
Source: Biomed Res Int. 2021 Nov 23;2021:4579850. doi: 10.1155/2021/4579850 (PMC8632384; doi:10.1155/2021/4579850)
Supplement: Supplementary Materials — Please find detailed data in the supplementary file, including the original data of SymMap, metabolomics, and molecular docking of Shenling Baizhu powder. “Shenling Baizhu powder SymMap” includes all herbal targets and combined targets. “Shenling Baizhu powder metabolomics” includes two-dimensional structural data analysis. “Molecular docking” involves molecule-target docking and the results. [file 4579850.f1.zip › Data in brief/3. Molecular docking/Molecular-targets for docking/1tnf.pdb]

HEADER    LYMPHOKINE                              25-AUG-89   1TNF              
TITLE     THE STRUCTURE OF TUMOR NECROSIS FACTOR-ALPHA AT 2.6                   
TITLE    2 ANGSTROMS RESOLUTION. IMPLICATIONS FOR RECEPTOR BINDING              
COMPND    MOL_ID: 1;                                                            
COMPND   2 MOLECULE: TUMOR NECROSIS FACTOR-ALPHA;                               
COMPND   3 CHAIN: A, B, C;                                                      
COMPND   4 ENGINEERED: YES                                                      
SOURCE    MOL_ID: 1;                                                            
SOURCE   2 ORGANISM_SCIENTIFIC: HOMO SAPIENS;                                   
SOURCE   3 ORGANISM_COMMON: HUMAN;                                              
SOURCE   4 ORGANISM_TAXID: 9606                                                 
KEYWDS    LYMPHOKINE                                                            
EXPDTA    X-RAY DIFFRACTION                                                     
AUTHOR    M.J.ECK,S.R.SPRANG                                                    
REVDAT   4   24-FEB-09 1TNF    1       VERSN                                    
REVDAT   3   01-APR-03 1TNF    1       JRNL                                     
REVDAT   2   15-JAN-91 1TNF    1       REMARK                                   
REVDAT   1   15-JAN-90 1TNF    0                                                
JRNL        AUTH   M.J.ECK,S.R.SPRANG                                           
JRNL        TITL   THE STRUCTURE OF TUMOR NECROSIS FACTOR-ALPHA AT              
JRNL        TITL 2 2.6 A RESOLUTION. IMPLICATIONS FOR RECEPTOR                  
JRNL        TITL 3 BINDING.                                                     
JRNL        REF    J.BIOL.CHEM.                  V. 264 17595 1989              
JRNL        REFN                   ISSN 0021-9258                               
JRNL        PMID   2551905                                                      
REMARK   1                                                                      
REMARK   1 REFERENCE 1                                                          
REMARK   1  AUTH   M.J.ECK,B.BEUTLER,G.KUO,J.P.MERRYWEATHER,S.R.SPRANG          
REMARK   1  TITL   CRYSTALLIZATION OF TRIMERIC RECOMBINANT HUMAN                
REMARK   1  TITL 2 TUMOR NECROSIS FACTOR (CACHECTIN)                            
REMARK   1  REF    J.BIOL.CHEM.                  V. 263 12816 1988              
REMARK   1  REFN                   ISSN 0021-9258                               
REMARK   2                                                                      
REMARK   2 RESOLUTION.    2.60 ANGSTROMS.                                       
REMARK   3                                                                      
REMARK   3 REFINEMENT.                                                          
REMARK   3   PROGRAM     : X-PLOR                                               
REMARK   3   AUTHORS     : BRUNGER                                              
REMARK   3                                                                      
REMARK   3  DATA USED IN REFINEMENT.                                            
REMARK   3   RESOLUTION RANGE HIGH (ANGSTROMS) : 2.60                           
REMARK   3   RESOLUTION RANGE LOW  (ANGSTROMS) : NULL                           
REMARK   3   DATA CUTOFF            (SIGMA(F)) : NULL                           
REMARK   3   DATA CUTOFF HIGH         (ABS(F)) : NULL                           
REMARK   3   DATA CUTOFF LOW          (ABS(F)) : NULL                           
REMARK   3   COMPLETENESS (WORKING+TEST)   (%) : NULL                           
REMARK   3   NUMBER OF REFLECTIONS             : NULL                           
REMARK   3                                                                      
REMARK   3  FIT TO DATA USED IN REFINEMENT.                                     
REMARK   3   CROSS-VALIDATION METHOD          : NULL                            
REMARK   3   FREE R VALUE TEST SET SELECTION  : NULL                            
REMARK   3   R VALUE            (WORKING SET) : 0.230                           
REMARK   3   FREE R VALUE                     : NULL                            
REMARK   3   FREE R VALUE TEST SET SIZE   (%) : NULL                            
REMARK   3   FREE R VALUE TEST SET COUNT      : NULL                            
REMARK   3   ESTIMATED ERROR OF FREE R VALUE  : NULL                            
REMARK   3                                                                      
REMARK   3  FIT IN THE HIGHEST RESOLUTION BIN.                                  
REMARK   3   TOTAL NUMBER OF BINS USED           : NULL                         
REMARK   3   BIN RESOLUTION RANGE HIGH       (A) : NULL                         
REMARK   3   BIN RESOLUTION RANGE LOW        (A) : NULL                         
REMARK   3   BIN COMPLETENESS (WORKING+TEST) (%) : NULL                         
REMARK   3   REFLECTIONS IN BIN    (WORKING SET) : NULL                         
REMARK   3   BIN R VALUE           (WORKING SET) : NULL                         
REMARK   3   BIN FREE R VALUE                    : NULL                         
REMARK   3   BIN FREE R VALUE TEST SET SIZE  (%) : NULL                         
REMARK   3   BIN FREE R VALUE TEST SET COUNT     : NULL                         
REMARK   3   ESTIMATED ERROR OF BIN FREE R VALUE : NULL                         
REMARK   3                                                                      
REMARK   3  NUMBER OF NON-HYDROGEN ATOMS USED IN REFINEMENT.                    
REMARK   3   PROTEIN ATOMS            : 3552                                    
REMARK   3   NUCLEIC ACID ATOMS       : 0                                       
REMARK   3   HETEROGEN ATOMS          : 0                                       
REMARK   3   SOLVENT ATOMS            : 0                                       
REMARK   3                                                                      
REMARK   3  B VALUES.                                                           
REMARK   3   FROM WILSON PLOT           (A**2) : NULL                           
REMARK   3   MEAN B VALUE      (OVERALL, A**2) : NULL                           
REMARK   3   OVERALL ANISOTROPIC B VALUE.                                       
REMARK   3    B11 (A**2) : NULL                                                 
REMARK   3    B22 (A**2) : NULL                                                 
REMARK   3    B33 (A**2) : NULL                                                 
REMARK   3    B12 (A**2) : NULL                                                 
REMARK   3    B13 (A**2) : NULL                                                 
REMARK   3    B23 (A**2) : NULL                                                 
REMARK   3                                                                      
REMARK   3  ESTIMATED COORDINATE ERROR.                                         
REMARK   3   ESD FROM LUZZATI PLOT        (A) : NULL                            
REMARK   3   ESD FROM SIGMAA              (A) : NULL                            
REMARK   3   LOW RESOLUTION CUTOFF        (A) : NULL                            
REMARK   3                                                                      
REMARK   3  CROSS-VALIDATED ESTIMATED COORDINATE ERROR.                         
REMARK   3   ESD FROM C-V LUZZATI PLOT    (A) : NULL                            
REMARK   3   ESD FROM C-V SIGMAA          (A) : NULL                            
REMARK   3                                                                      
REMARK   3  RMS DEVIATIONS FROM IDEAL VALUES.                                   
REMARK   3   BOND LENGTHS                 (A) : 0.015                           
REMARK   3   BOND ANGLES            (DEGREES) : 4.10                            
REMARK   3   DIHEDRAL ANGLES        (DEGREES) : NULL                            
REMARK   3   IMPROPER ANGLES        (DEGREES) : NULL                            
REMARK   3                                                                      
REMARK   3  ISOTROPIC THERMAL MODEL : NULL                                      
REMARK   3                                                                      
REMARK   3  ISOTROPIC THERMAL FACTOR RESTRAINTS.    RMS    SIGMA                
REMARK   3   MAIN-CHAIN BOND              (A**2) : NULL  ; NULL                 
REMARK   3   MAIN-CHAIN ANGLE             (A**2) : NULL  ; NULL                 
REMARK   3   SIDE-CHAIN BOND              (A**2) : NULL  ; NULL                 
REMARK   3   SIDE-CHAIN ANGLE             (A**2) : NULL  ; NULL                 
REMARK   3                                                                      
REMARK   3  NCS MODEL : NULL                                                    
REMARK   3                                                                      
REMARK   3  NCS RESTRAINTS.                         RMS   SIGMA/WEIGHT          
REMARK   3   GROUP  1  POSITIONAL            (A) : NULL  ; NULL                 
REMARK   3   GROUP  1  B-FACTOR           (A**2) : NULL  ; NULL                 
REMARK   3                                                                      
REMARK   3  PARAMETER FILE  1  : NULL                                           
REMARK   3  TOPOLOGY FILE  1   : NULL                                           
REMARK   3                                                                      
REMARK   3  OTHER REFINEMENT REMARKS: NULL                                      
REMARK   4                                                                      
REMARK   4 1TNF COMPLIES WITH FORMAT V. 3.15, 01-DEC-08                         
REMARK 100                                                                      
REMARK 100 THIS ENTRY HAS BEEN PROCESSED BY BNL.                                
REMARK 200                                                                      
REMARK 200 EXPERIMENTAL DETAILS                                                 
REMARK 200  EXPERIMENT TYPE                : X-RAY DIFFRACTION                  
REMARK 200  DATE OF DATA COLLECTION        : NULL                               
REMARK 200  TEMPERATURE           (KELVIN) : NULL                               
REMARK 200  PH                             : NULL                               
REMARK 200  NUMBER OF CRYSTALS USED        : NULL                               
REMARK 200                                                                      
REMARK 200  SYNCHROTRON              (Y/N) : NULL                               
REMARK 200  RADIATION SOURCE               : NULL                               
REMARK 200  BEAMLINE                       : NULL                               
REMARK 200  X-RAY GENERATOR MODEL          : NULL                               
REMARK 200  MONOCHROMATIC OR LAUE    (M/L) : NULL                               
REMARK 200  WAVELENGTH OR RANGE        (A) : NULL                               
REMARK 200  MONOCHROMATOR                  : NULL                               
REMARK 200  OPTICS                         : NULL                               
REMARK 200                                                                      
REMARK 200  DETECTOR TYPE                  : NULL                               
REMARK 200  DETECTOR MANUFACTURER          : NULL                               
REMARK 200  INTENSITY-INTEGRATION SOFTWARE : NULL                               
REMARK 200  DATA SCALING SOFTWARE          : NULL                               
REMARK 200                                                                      
REMARK 200  NUMBER OF UNIQUE REFLECTIONS   : NULL                               
REMARK 200  RESOLUTION RANGE HIGH      (A) : NULL                               
REMARK 200  RESOLUTION RANGE LOW       (A) : NULL                               
REMARK 200  REJECTION CRITERIA  (SIGMA(I)) : NULL                               
REMARK 200                                                                      
REMARK 200 OVERALL.                                                             
REMARK 200  COMPLETENESS FOR RANGE     (%) : NULL                               
REMARK 200  DATA REDUNDANCY                : NULL                               
REMARK 200  R MERGE                    (I) : NULL                               
REMARK 200  R SYM                      (I) : NULL                               
REMARK 200  <I/SIGMA(I)> FOR THE DATA SET  : NULL                               
REMARK 200                                                                      
REMARK 200 IN THE HIGHEST RESOLUTION SHELL.                                     
REMARK 200  HIGHEST RESOLUTION SHELL, RANGE HIGH (A) : NULL                     
REMARK 200  HIGHEST RESOLUTION SHELL, RANGE LOW  (A) : NULL                     
REMARK 200  COMPLETENESS FOR SHELL     (%) : NULL                               
REMARK 200  DATA REDUNDANCY IN SHELL       : NULL                               
REMARK 200  R MERGE FOR SHELL          (I) : NULL                               
REMARK 200  R SYM FOR SHELL            (I) : NULL                               
REMARK 200  <I/SIGMA(I)> FOR SHELL         : NULL                               
REMARK 200                                                                      
REMARK 200 DIFFRACTION PROTOCOL: NULL                                           
REMARK 200 METHOD USED TO DETERMINE THE STRUCTURE: NULL                         
REMARK 200 SOFTWARE USED: NULL                                                  
REMARK 200 STARTING MODEL: NULL                                                 
REMARK 200                                                                      
REMARK 200 REMARK: NULL                                                         
REMARK 280                                                                      
REMARK 280 CRYSTAL                                                              
REMARK 280 SOLVENT CONTENT, VS   (%): 51.41                                     
REMARK 280 MATTHEWS COEFFICIENT, VM (ANGSTROMS**3/DA): 2.53                     
REMARK 280                                                                      
REMARK 280 CRYSTALLIZATION CONDITIONS: NULL                                     
REMARK 290                                                                      
REMARK 290 CRYSTALLOGRAPHIC SYMMETRY                                            
REMARK 290 SYMMETRY OPERATORS FOR SPACE GROUP: P 41 21 2                        
REMARK 290                                                                      
REMARK 290      SYMOP   SYMMETRY                                                
REMARK 290     NNNMMM   OPERATOR                                                
REMARK 290       1555   X,Y,Z                                                   
REMARK 290       2555   -X,-Y,Z+1/2                                             
REMARK 290       3555   -Y+1/2,X+1/2,Z+1/4                                      
REMARK 290       4555   Y+1/2,-X+1/2,Z+3/4                                      
REMARK 290       5555   -X+1/2,Y+1/2,-Z+1/4                                     
REMARK 290       6555   X+1/2,-Y+1/2,-Z+3/4                                     
REMARK 290       7555   Y,X,-Z                                                  
REMARK 290       8555   -Y,-X,-Z+1/2                                            
REMARK 290                                                                      
REMARK 290     WHERE NNN -> OPERATOR NUMBER                                     
REMARK 290           MMM -> TRANSLATION VECTOR                                  
REMARK 290                                                                      
REMARK 290 CRYSTALLOGRAPHIC SYMMETRY TRANSFORMATIONS                            
REMARK 290 THE FOLLOWING TRANSFORMATIONS OPERATE ON THE ATOM/HETATM             
REMARK 290 RECORDS IN THIS ENTRY TO PRODUCE CRYSTALLOGRAPHICALLY                
REMARK 290 RELATED MOLECULES.                                                   
REMARK 290   SMTRY1   1  1.000000  0.000000  0.000000        0.00000            
REMARK 290   SMTRY2   1  0.000000  1.000000  0.000000        0.00000            
REMARK 290   SMTRY3   1  0.000000  0.000000  1.000000        0.00000            
REMARK 290   SMTRY1   2 -1.000000  0.000000  0.000000        0.00000            
REMARK 290   SMTRY2   2  0.000000 -1.000000  0.000000        0.00000            
REMARK 290   SMTRY3   2  0.000000  0.000000  1.000000       58.50000            
REMARK 290   SMTRY1   3  0.000000 -1.000000  0.000000       47.50000            
REMARK 290   SMTRY2   3  1.000000  0.000000  0.000000       47.50000            
REMARK 290   SMTRY3   3  0.000000  0.000000  1.000000       29.25000            
REMARK 290   SMTRY1   4  0.000000  1.000000  0.000000       47.50000            
REMARK 290   SMTRY2   4 -1.000000  0.000000  0.000000       47.50000            
REMARK 290   SMTRY3   4  0.000000  0.000000  1.000000       87.75000            
REMARK 290   SMTRY1   5 -1.000000  0.000000  0.000000       47.50000            
REMARK 290   SMTRY2   5  0.000000  1.000000  0.000000       47.50000            
REMARK 290   SMTRY3   5  0.000000  0.000000 -1.000000       29.25000            
REMARK 290   SMTRY1   6  1.000000  0.000000  0.000000       47.50000            
REMARK 290   SMTRY2   6  0.000000 -1.000000  0.000000       47.50000            
REMARK 290   SMTRY3   6  0.000000  0.000000 -1.000000       87.75000            
REMARK 290   SMTRY1   7  0.000000  1.000000  0.000000        0.00000            
REMARK 290   SMTRY2   7  1.000000  0.000000  0.000000        0.00000            
REMARK 290   SMTRY3   7  0.000000  0.000000 -1.000000        0.00000            
REMARK 290   SMTRY1   8  0.000000 -1.000000  0.000000        0.00000            
REMARK 290   SMTRY2   8 -1.000000  0.000000  0.000000        0.00000            
REMARK 290   SMTRY3   8  0.000000  0.000000 -1.000000       58.50000            
REMARK 290                                                                      
REMARK 290 REMARK: NULL                                                         
REMARK 300                                                                      
REMARK 300 BIOMOLECULE: 1                                                       
REMARK 300 SEE REMARK 350 FOR THE AUTHOR PROVIDED AND/OR PROGRAM                
REMARK 300 GENERATED ASSEMBLY INFORMATION FOR THE STRUCTURE IN                  
REMARK 300 THIS ENTRY. THE REMARK MAY ALSO PROVIDE INFORMATION ON               
REMARK 300 BURIED SURFACE AREA.                                                 
REMARK 300 REMARK:                                                              
REMARK 300 THE MOLECULE EXISTS AS A TRIMER IN WHICH THE THREE SUBUNITS          
REMARK 300 ARE RELATED BY APPROXIMATE THREE-FOLD SYMMETRY.  THE THREE           
REMARK 300 SUBUNITS HAVE BEEN ASSIGNED CHAIN INDICATORS A, B, AND C.            
REMARK 300 THE TRANSFORMATION PRESENTED ON *MTRIX 1* RECORDS BELOW              
REMARK 300 WILL YIELD APPROXIMATE COORDINATES FOR CHAIN B WHEN APPLIED          
REMARK 300 TO CHAIN A.  THE TRANSFORMATION PRESENTED ON *MTRIX 2*               
REMARK 300 RECORDS BELOW WILL YIELD APPROXIMATE COORDINATES FOR CHAIN           
REMARK 300 C WHEN APPLIED TO CHAIN A.  THE TRANSFORMATION PRESENTED ON          
REMARK 300 *MTRIX 3* RECORDS BELOW WILL YIELD APPROXIMATE COORDINATES           
REMARK 300 FOR CHAIN C WHEN APPLIED TO CHAIN B.                                 
REMARK 350                                                                      
REMARK 350 COORDINATES FOR A COMPLETE MULTIMER REPRESENTING THE KNOWN           
REMARK 350 BIOLOGICALLY SIGNIFICANT OLIGOMERIZATION STATE OF THE                
REMARK 350 MOLECULE CAN BE GENERATED BY APPLYING BIOMT TRANSFORMATIONS          
REMARK 350 GIVEN BELOW.  BOTH NON-CRYSTALLOGRAPHIC AND                          
REMARK 350 CRYSTALLOGRAPHIC OPERATIONS ARE GIVEN.                               
REMARK 350                                                                      
REMARK 350 BIOMOLECULE: 1                                                       
REMARK 350 AUTHOR DETERMINED BIOLOGICAL UNIT: TRIMERIC                          
REMARK 350 SOFTWARE DETERMINED QUATERNARY STRUCTURE: TRIMERIC                   
REMARK 350 SOFTWARE USED: PISA                                                  
REMARK 350 TOTAL BURIED SURFACE AREA: 7040 ANGSTROM**2                          
REMARK 350 SURFACE AREA OF THE COMPLEX: 18400 ANGSTROM**2                       
REMARK 350 CHANGE IN SOLVENT FREE ENERGY: -37.0 KCAL/MOL                        
REMARK 350 APPLY THE FOLLOWING TO CHAINS: A, B, C                               
REMARK 350   BIOMT1   1  1.000000  0.000000  0.000000        0.00000            
REMARK 350   BIOMT2   1  0.000000  1.000000  0.000000        0.00000            
REMARK 350   BIOMT3   1  0.000000  0.000000  1.000000        0.00000            
REMARK 465                                                                      
REMARK 465 MISSING RESIDUES                                                     
REMARK 465 THE FOLLOWING RESIDUES WERE NOT LOCATED IN THE                       
REMARK 465 EXPERIMENT. (M=MODEL NUMBER; RES=RESIDUE NAME; C=CHAIN               
REMARK 465 IDENTIFIER; SSSEQ=SEQUENCE NUMBER; I=INSERTION CODE.)                
REMARK 465                                                                      
REMARK 465   M RES C SSSEQI                                                     
REMARK 465     VAL A     1                                                      
REMARK 465     ARG A     2                                                      
REMARK 465     SER A     3                                                      
REMARK 465     SER A     4                                                      
REMARK 465     SER A     5                                                      
REMARK 465     VAL B     1                                                      
REMARK 465     ARG B     2                                                      
REMARK 465     SER B     3                                                      
REMARK 465     SER B     4                                                      
REMARK 465     SER B     5                                                      
REMARK 465     VAL C     1                                                      
REMARK 465     ARG C     2                                                      
REMARK 465     SER C     3                                                      
REMARK 465     SER C     4                                                      
REMARK 465     SER C     5                                                      
REMARK 470                                                                      
REMARK 470 MISSING ATOM                                                         
REMARK 470 THE FOLLOWING RESIDUES HAVE MISSING ATOMS(M=MODEL NUMBER;            
REMARK 470 RES=RESIDUE NAME; C=CHAIN IDENTIFIER; SSEQ=SEQUENCE NUMBER;          
REMARK 470 I=INSERTION CODE):                                                   
REMARK 470   M RES CSSEQI  ATOMS                                                
REMARK 470     ARG A   6    CG   CD   NE   CZ   NH1  NH2                        
REMARK 470     ARG B   6    CG   CD   NE   CZ   NH1  NH2                        
REMARK 470     ARG C   6    CG   CD   NE   CZ   NH1  NH2                        
REMARK 500                                                                      
REMARK 500 GEOMETRY AND STEREOCHEMISTRY                                         
REMARK 500 SUBTOPIC: COVALENT BOND LENGTHS                                      
REMARK 500                                                                      
REMARK 500 THE STEREOCHEMICAL PARAMETERS OF THE FOLLOWING RESIDUES              
REMARK 500 HAVE VALUES WHICH DEVIATE FROM EXPECTED VALUES BY MORE               
REMARK 500 THAN 6*RMSD (M=MODEL NUMBER; RES=RESIDUE NAME; C=CHAIN               
REMARK 500 IDENTIFIER; SSEQ=SEQUENCE NUMBER; I=INSERTION CODE).                 
REMARK 500                                                                      
REMARK 500 STANDARD TABLE:                                                      
REMARK 500 FORMAT: (10X,I3,1X,2(A3,1X,A1,I4,A1,1X,A4,3X),1X,F6.3)               
REMARK 500                                                                      
REMARK 500 EXPECTED VALUES PROTEIN: ENGH AND HUBER, 1999                        
REMARK 500 EXPECTED VALUES NUCLEIC ACID: CLOWNEY ET AL 1996                     
REMARK 500                                                                      
REMARK 500  M RES CSSEQI ATM1   RES CSSEQI ATM2   DEVIATION                     
REMARK 500    HIS A  15   NE2   HIS A  15   CD2    -0.078                       
REMARK 500    HIS A  73   NE2   HIS A  73   CD2    -0.067                       
REMARK 500    HIS A  78   NE2   HIS A  78   CD2    -0.079                       
REMARK 500    HIS B  15   NE2   HIS B  15   CD2    -0.077                       
REMARK 500    HIS B  73   NE2   HIS B  73   CD2    -0.067                       
REMARK 500    HIS B  78   NE2   HIS B  78   CD2    -0.068                       
REMARK 500    HIS C  15   NE2   HIS C  15   CD2    -0.076                       
REMARK 500    HIS C  73   NE2   HIS C  73   CD2    -0.071                       
REMARK 500    HIS C  78   NE2   HIS C  78   CD2    -0.073                       
REMARK 500                                                                      
REMARK 500 REMARK: NULL                                                         
REMARK 500                                                                      
REMARK 500 GEOMETRY AND STEREOCHEMISTRY                                         
REMARK 500 SUBTOPIC: COVALENT BOND ANGLES                                       
REMARK 500                                                                      
REMARK 500 THE STEREOCHEMICAL PARAMETERS OF THE FOLLOWING RESIDUES              
REMARK 500 HAVE VALUES WHICH DEVIATE FROM EXPECTED VALUES BY MORE               
REMARK 500 THAN 6*RMSD (M=MODEL NUMBER; RES=RESIDUE NAME; C=CHAIN               
REMARK 500 IDENTIFIER; SSEQ=SEQUENCE NUMBER; I=INSERTION CODE).                 
REMARK 500                                                                      
REMARK 500 STANDARD TABLE:                                                      
REMARK 500 FORMAT: (10X,I3,1X,A3,1X,A1,I4,A1,3(1X,A4,2X),12X,F5.1)              
REMARK 500                                                                      
REMARK 500 EXPECTED VALUES PROTEIN: ENGH AND HUBER, 1999                        
REMARK 500 EXPECTED VALUES NUCLEIC ACID: CLOWNEY ET AL 1996                     
REMARK 500                                                                      
REMARK 500  M RES CSSEQI ATM1   ATM2   ATM3                                     
REMARK 500    TRP A  28   CD1 -  CG  -  CD2 ANGL. DEV. =   7.6 DEGREES          
REMARK 500    TRP A  28   CE2 -  CD2 -  CG  ANGL. DEV. =  -6.8 DEGREES          
REMARK 500    ARG A  32   NE  -  CZ  -  NH1 ANGL. DEV. =  -3.3 DEGREES          
REMARK 500    ARG A  32   NE  -  CZ  -  NH2 ANGL. DEV. =   3.3 DEGREES          
REMARK 500    LEU A  37   N   -  CA  -  C   ANGL. DEV. = -18.5 DEGREES          
REMARK 500    LEU A  43   CA  -  CB  -  CG  ANGL. DEV. =  14.5 DEGREES          
REMARK 500    ARG A  44   NE  -  CZ  -  NH1 ANGL. DEV. =  -3.5 DEGREES          
REMARK 500    ARG A  44   NE  -  CZ  -  NH2 ANGL. DEV. =   4.2 DEGREES          
REMARK 500    CYS A  69   CA  -  CB  -  SG  ANGL. DEV. = -15.4 DEGREES          
REMARK 500    HIS A  73   CA  -  CB  -  CG  ANGL. DEV. = -13.6 DEGREES          
REMARK 500    ARG A  82   NE  -  CZ  -  NH1 ANGL. DEV. =  -4.1 DEGREES          
REMARK 500    ARG A  82   NE  -  CZ  -  NH2 ANGL. DEV. =   3.9 DEGREES          
REMARK 500    VAL A  85   CA  -  CB  -  CG2 ANGL. DEV. = -11.3 DEGREES          
REMARK 500    TYR A  87   CA  -  CB  -  CG  ANGL. DEV. =  13.0 DEGREES          
REMARK 500    CYS A 101   CA  -  CB  -  SG  ANGL. DEV. = -11.3 DEGREES          
REMARK 500    GLN A 102   N   -  CA  -  C   ANGL. DEV. = -19.0 DEGREES          
REMARK 500    ARG A 103   NE  -  CZ  -  NH2 ANGL. DEV. =   3.5 DEGREES          
REMARK 500    TRP A 114   CD1 -  CG  -  CD2 ANGL. DEV. =   6.2 DEGREES          
REMARK 500    TRP A 114   CE2 -  CD2 -  CG  ANGL. DEV. =  -5.7 DEGREES          
REMARK 500    ARG A 138   NE  -  CZ  -  NH1 ANGL. DEV. =  -4.6 DEGREES          
REMARK 500    ARG A 138   NE  -  CZ  -  NH2 ANGL. DEV. =   8.1 DEGREES          
REMARK 500    THR B   7   N   -  CA  -  CB  ANGL. DEV. = -11.6 DEGREES          
REMARK 500    TRP B  28   CD1 -  CG  -  CD2 ANGL. DEV. =   6.2 DEGREES          
REMARK 500    TRP B  28   CE2 -  CD2 -  CG  ANGL. DEV. =  -5.9 DEGREES          
REMARK 500    LEU B  29   CA  -  CB  -  CG  ANGL. DEV. =  15.1 DEGREES          
REMARK 500    SER B  71   CA  -  C   -  N   ANGL. DEV. = -13.9 DEGREES          
REMARK 500    ARG B  82   CA  -  CB  -  CG  ANGL. DEV. =  14.2 DEGREES          
REMARK 500    GLN B  88   CA  -  CB  -  CG  ANGL. DEV. =  22.2 DEGREES          
REMARK 500    ALA B 111   N   -  CA  -  C   ANGL. DEV. =  17.0 DEGREES          
REMARK 500    TRP B 114   CD1 -  CG  -  CD2 ANGL. DEV. =   6.5 DEGREES          
REMARK 500    TRP B 114   CE2 -  CD2 -  CG  ANGL. DEV. =  -5.8 DEGREES          
REMARK 500    ARG B 131   NE  -  CZ  -  NH2 ANGL. DEV. =   5.2 DEGREES          
REMARK 500    ARG B 138   NE  -  CZ  -  NH1 ANGL. DEV. =  -4.8 DEGREES          
REMARK 500    ARG B 138   NE  -  CZ  -  NH2 ANGL. DEV. =   5.9 DEGREES          
REMARK 500    TYR B 151   CB  -  CG  -  CD1 ANGL. DEV. =  -3.9 DEGREES          
REMARK 500    ASP C  10   CA  -  C   -  N   ANGL. DEV. = -14.5 DEGREES          
REMARK 500    TRP C  28   CD1 -  CG  -  CD2 ANGL. DEV. =   5.0 DEGREES          
REMARK 500    TRP C  28   CB  -  CG  -  CD1 ANGL. DEV. =  -7.8 DEGREES          
REMARK 500    TRP C  28   CE2 -  CD2 -  CG  ANGL. DEV. =  -5.4 DEGREES          
REMARK 500    TRP C  28   CG  -  CD2 -  CE3 ANGL. DEV. =   6.3 DEGREES          
REMARK 500    ARG C  32   NE  -  CZ  -  NH2 ANGL. DEV. =   5.5 DEGREES          
REMARK 500    ALA C  38   CA  -  C   -  N   ANGL. DEV. = -14.9 DEGREES          
REMARK 500    ALA C  38   O   -  C   -  N   ANGL. DEV. =  10.2 DEGREES          
REMARK 500    ARG C  44   NE  -  CZ  -  NH2 ANGL. DEV. =   3.2 DEGREES          
REMARK 500    ARG C  44   CA  -  C   -  N   ANGL. DEV. =  16.0 DEGREES          
REMARK 500    ARG C  82   NE  -  CZ  -  NH2 ANGL. DEV. =   3.0 DEGREES          
REMARK 500    TYR C  87   CA  -  CB  -  CG  ANGL. DEV. =  11.7 DEGREES          
REMARK 500    TYR C  87   CB  -  CG  -  CD2 ANGL. DEV. =  -4.6 DEGREES          
REMARK 500    TYR C  87   N   -  CA  -  C   ANGL. DEV. = -18.8 DEGREES          
REMARK 500    GLN C  88   CA  -  CB  -  CG  ANGL. DEV. = -14.8 DEGREES          
REMARK 500                                                                      
REMARK 500 THIS ENTRY HAS      58 ANGLE DEVIATIONS.                             
REMARK 500                                                                      
REMARK 500 REMARK: NULL                                                         
REMARK 500                                                                      
REMARK 500 GEOMETRY AND STEREOCHEMISTRY                                         
REMARK 500 SUBTOPIC: TORSION ANGLES                                             
REMARK 500                                                                      
REMARK 500 TORSION ANGLES OUTSIDE THE EXPECTED RAMACHANDRAN REGIONS:            
REMARK 500 (M=MODEL NUMBER; RES=RESIDUE NAME; C=CHAIN IDENTIFIER;               
REMARK 500 SSEQ=SEQUENCE NUMBER; I=INSERTION CODE).                             
REMARK 500                                                                      
REMARK 500 STANDARD TABLE:                                                      
REMARK 500 FORMAT:(10X,I3,1X,A3,1X,A1,I4,A1,4X,F7.2,3X,F7.2)                    
REMARK 500                                                                      
REMARK 500 EXPECTED VALUES: GJ KLEYWEGT AND TA JONES (1996). PHI/PSI-           
REMARK 500 CHOLOGY: RAMACHANDRAN REVISITED. STRUCTURE 4, 1395 - 1400            
REMARK 500                                                                      
REMARK 500  M RES CSSEQI        PSI       PHI                                   
REMARK 500    SER A   9      154.98     58.28                                   
REMARK 500    ASP A  10       55.79    -90.64                                   
REMARK 500    ALA A  22       98.18   -165.86                                   
REMARK 500    ASN A  30     -133.94   -127.53                                   
REMARK 500    ARG A  31      -33.09     60.04                                   
REMARK 500    ARG A  32     -163.66    -65.01                                   
REMARK 500    ALA A  35       78.59   -116.21                                   
REMARK 500    ALA A  38     -131.11   -116.98                                   
REMARK 500    ASN A  39       77.03    -65.69                                   
REMARK 500    ARG A  44     -107.79   -124.84                                   
REMARK 500    PRO A  70     -126.62    -87.44                                   
REMARK 500    THR A  72      -60.61     31.06                                   
REMARK 500    LEU A  75      103.22     55.43                                   
REMARK 500    SER A  86      -60.69   -123.03                                   
REMARK 500    PRO A 100     -110.81    -68.93                                   
REMARK 500    ARG A 103      172.65     59.19                                   
REMARK 500    GLU A 104      -58.23    143.33                                   
REMARK 500    GLU A 107      -31.40     18.65                                   
REMARK 500    GLU A 110      -87.20    -67.71                                   
REMARK 500    GLN A 149      -73.58   -141.29                                   
REMARK 500    ILE A 155      121.56   -174.04                                   
REMARK 500    PRO B   8      -78.54    -50.97                                   
REMARK 500    SER B   9      146.20    167.72                                   
REMARK 500    ASP B  10       64.27   -103.98                                   
REMARK 500    HIS B  15       77.63   -153.63                                   
REMARK 500    GLN B  21       26.68    -73.04                                   
REMARK 500    ASN B  30     -166.03   -107.29                                   
REMARK 500    ASN B  34       42.98   -148.92                                   
REMARK 500    LEU B  37       96.98    174.36                                   
REMARK 500    ARG B  44      -91.17    -99.22                                   
REMARK 500    ASP B  45       55.54    -93.50                                   
REMARK 500    SER B  60      130.97   -171.65                                   
REMARK 500    THR B  72     -123.74     47.18                                   
REMARK 500    LEU B  75      109.50     52.56                                   
REMARK 500    ALA B  84     -151.23    -49.81                                   
REMARK 500    VAL B  85      -31.99   -140.06                                   
REMARK 500    SER B  86     -102.29    -87.76                                   
REMARK 500    GLN B  88       63.62    -57.32                                   
REMARK 500    ARG B 103      163.73     61.78                                   
REMARK 500    GLU B 104      -50.73    153.78                                   
REMARK 500    PRO B 106       87.78    -67.85                                   
REMARK 500    GLU B 107      -71.30    -56.25                                   
REMARK 500    ALA B 109      -48.37   -148.90                                   
REMARK 500    GLU B 110      -26.84     73.32                                   
REMARK 500    ALA B 111      160.41     73.81                                   
REMARK 500    ALA B 145       45.13    -93.71                                   
REMARK 500    SER B 147      -78.36   -112.27                                   
REMARK 500    GLN B 149      -26.37   -144.57                                   
REMARK 500    PRO C   8     -169.31    -72.71                                   
REMARK 500    SER C   9       75.82     53.10                                   
REMARK 500    PRO C  12      127.54    -37.13                                   
REMARK 500    ALA C  18     -164.34    -76.91                                   
REMARK 500    PRO C  20       38.76    -80.12                                   
REMARK 500    GLU C  23      -40.52    -14.82                                   
REMARK 500    GLN C  25      -56.97   -155.27                                   
REMARK 500    LEU C  26       58.28     88.63                                   
REMARK 500    ARG C  31      -27.14    115.06                                   
REMARK 500    ARG C  32      151.06    -43.68                                   
REMARK 500    ALA C  33      -53.20    -16.54                                   
REMARK 500    ASN C  39       76.83     33.42                                   
REMARK 500    ARG C  44     -113.93   -121.98                                   
REMARK 500    PRO C  51     -147.38    -83.35                                   
REMARK 500    SER C  52      -90.56     36.91                                   
REMARK 500    GLU C  53      158.88    136.41                                   
REMARK 500    THR C  72      150.01     72.41                                   
REMARK 500    LEU C  75       95.80     34.05                                   
REMARK 500    SER C  86     -100.31    -93.20                                   
REMARK 500    GLN C  88     -166.00    -69.95                                   
REMARK 500    THR C  89      165.30     84.36                                   
REMARK 500    GLU C 104      -48.98   -137.67                                   
REMARK 500    PRO C 106       70.52    -20.35                                   
REMARK 500    GLU C 107      -85.93    -90.44                                   
REMARK 500    GLU C 110      128.42    -32.37                                   
REMARK 500    ALA C 111       84.81     20.53                                   
REMARK 500    LYS C 128      110.41    -38.55                                   
REMARK 500    TYR C 141       30.61    -84.03                                   
REMARK 500    ALA C 145       58.55   -172.39                                   
REMARK 500    SER C 147      -78.19   -163.32                                   
REMARK 500                                                                      
REMARK 500 REMARK: NULL                                                         
REMARK 500                                                                      
REMARK 500 GEOMETRY AND STEREOCHEMISTRY                                         
REMARK 500 SUBTOPIC: NON-CIS, NON-TRANS                                         
REMARK 500                                                                      
REMARK 500 THE FOLLOWING PEPTIDE BONDS DEVIATE SIGNIFICANTLY FROM BOTH          
REMARK 500 CIS AND TRANS CONFORMATION.  CIS BONDS, IF ANY, ARE LISTED           
REMARK 500 ON CISPEP RECORDS.  TRANS IS DEFINED AS 180 +/- 30 AND               
REMARK 500 CIS IS DEFINED AS 0 +/- 30 DEGREES.                                  
REMARK 500                                 MODEL     OMEGA                      
REMARK 500 THR A    7     PRO A    8                  117.21                    
REMARK 500 THR A  105     PRO A  106                  -99.71                    
REMARK 500 THR B    7     PRO B    8                  144.02                    
REMARK 500 THR B  105     PRO B  106                 -142.83                    
REMARK 500 THR C    7     PRO C    8                   51.13                    
REMARK 500 LYS C   11     PRO C   12                  135.94                    
REMARK 500 GLU C  146     SER C  147                  141.65                    
REMARK 500                                                                      
REMARK 500 REMARK: NULL                                                         
DBREF  1TNF A    1   157  UNP    P01375   TNFA_HUMAN      77    233             
DBREF  1TNF B    1   157  UNP    P01375   TNFA_HUMAN      77    233             
DBREF  1TNF C    1   157  UNP    P01375   TNFA_HUMAN      77    233             
SEQADV 1TNF ASP A   45  UNP  P01375    LEU   219 CONFLICT                       
SEQADV 1TNF ASP B   45  UNP  P01375    LEU   219 CONFLICT                       
SEQADV 1TNF ASP C   45  UNP  P01375    LEU   219 CONFLICT                       
SEQRES   1 A  157  VAL ARG SER SER SER ARG THR PRO SER ASP LYS PRO VAL          
SEQRES   2 A  157  ALA HIS VAL VAL ALA ASN PRO GLN ALA GLU GLY GLN LEU          
SEQRES   3 A  157  GLN TRP LEU ASN ARG ARG ALA ASN ALA LEU LEU ALA ASN          
SEQRES   4 A  157  GLY VAL GLU LEU ARG ASP ASN GLN LEU VAL VAL PRO SER          
SEQRES   5 A  157  GLU GLY LEU TYR LEU ILE TYR SER GLN VAL LEU PHE LYS          
SEQRES   6 A  157  GLY GLN GLY CYS PRO SER THR HIS VAL LEU LEU THR HIS          
SEQRES   7 A  157  THR ILE SER ARG ILE ALA VAL SER TYR GLN THR LYS VAL          
SEQRES   8 A  157  ASN LEU LEU SER ALA ILE LYS SER PRO CYS GLN ARG GLU          
SEQRES   9 A  157  THR PRO GLU GLY ALA GLU ALA LYS PRO TRP TYR GLU PRO          
SEQRES  10 A  157  ILE TYR LEU GLY GLY VAL PHE GLN LEU GLU LYS GLY ASP          
SEQRES  11 A  157  ARG LEU SER ALA GLU ILE ASN ARG PRO ASP TYR LEU LEU          
SEQRES  12 A  157  PHE ALA GLU SER GLY GLN VAL TYR PHE GLY ILE ILE ALA          
SEQRES  13 A  157  LEU                                                          
SEQRES   1 B  157  VAL ARG SER SER SER ARG THR PRO SER ASP LYS PRO VAL          
SEQRES   2 B  157  ALA HIS VAL VAL ALA ASN PRO GLN ALA GLU GLY GLN LEU          
SEQRES   3 B  157  GLN TRP LEU ASN ARG ARG ALA ASN ALA LEU LEU ALA ASN          
SEQRES   4 B  157  GLY VAL GLU LEU ARG ASP ASN GLN LEU VAL VAL PRO SER          
SEQRES   5 B  157  GLU GLY LEU TYR LEU ILE TYR SER GLN VAL LEU PHE LYS          
SEQRES   6 B  157  GLY GLN GLY CYS PRO SER THR HIS VAL LEU LEU THR HIS          
SEQRES   7 B  157  THR ILE SER ARG ILE ALA VAL SER TYR GLN THR LYS VAL          
SEQRES   8 B  157  ASN LEU LEU SER ALA ILE LYS SER PRO CYS GLN ARG GLU          
SEQRES   9 B  157  THR PRO GLU GLY ALA GLU ALA LYS PRO TRP TYR GLU PRO          
SEQRES  10 B  157  ILE TYR LEU GLY GLY VAL PHE GLN LEU GLU LYS GLY ASP          
SEQRES  11 B  157  ARG LEU SER ALA GLU ILE ASN ARG PRO ASP TYR LEU LEU          
SEQRES  12 B  157  PHE ALA GLU SER GLY GLN VAL TYR PHE GLY ILE ILE ALA          
SEQRES  13 B  157  LEU                                                          
SEQRES   1 C  157  VAL ARG SER SER SER ARG THR PRO SER ASP LYS PRO VAL          
SEQRES   2 C  157  ALA HIS VAL VAL ALA ASN PRO GLN ALA GLU GLY GLN LEU          
SEQRES   3 C  157  GLN TRP LEU ASN ARG ARG ALA ASN ALA LEU LEU ALA ASN          
SEQRES   4 C  157  GLY VAL GLU LEU ARG ASP ASN GLN LEU VAL VAL PRO SER          
SEQRES   5 C  157  GLU GLY LEU TYR LEU ILE TYR SER GLN VAL LEU PHE LYS          
SEQRES   6 C  157  GLY GLN GLY CYS PRO SER THR HIS VAL LEU LEU THR HIS          
SEQRES   7 C  157  THR ILE SER ARG ILE ALA VAL SER TYR GLN THR LYS VAL          
SEQRES   8 C  157  ASN LEU LEU SER ALA ILE LYS SER PRO CYS GLN ARG GLU          
SEQRES   9 C  157  THR PRO GLU GLY ALA GLU ALA LYS PRO TRP TYR GLU PRO          
SEQRES  10 C  157  ILE TYR LEU GLY GLY VAL PHE GLN LEU GLU LYS GLY ASP          
SEQRES  11 C  157  ARG LEU SER ALA GLU ILE ASN ARG PRO ASP TYR LEU LEU          
SEQRES  12 C  157  PHE ALA GLU SER GLY GLN VAL TYR PHE GLY ILE ILE ALA          
SEQRES  13 C  157  LEU                                                          
HELIX    1 H1A ARG A  138  LEU A  142  5                                   5    
HELIX    2 H1B ARG B  138  LEU B  142  5                                   5    
HELIX    3 H1C ARG C  138  LEU C  142  5                                   5    
SHEET    1 S1A 5 LEU A  36  ALA A  38  0                                        
SHEET    2 S1A 5 PRO A  12  ALA A  18 -1  N  HIS A  15   O  LEU A  36           
SHEET    3 S1A 5 VAL A 150  LEU A 157 -1  O  VAL A 150   N  ALA A  18           
SHEET    4 S1A 5 GLY A  54  GLY A  68 -1  O  GLN A  61   N  TYR A 151           
SHEET    5 S1A 5 LYS A 112  LEU A 126 -1  N  LEU A 126   O  GLY A  54           
SHEET    1 S2A 5 GLU A  42  ARG A  44  0                                        
SHEET    2 S2A 5 GLN A  47  VAL A  50 -1  O  GLN A  47   N  ARG A  44           
SHEET    3 S2A 5 GLY A 129  ILE A 136 -1  N  GLY A 129   O  VAL A  50           
SHEET    4 S2A 5 LEU A  76  ALA A  84 -1  N  THR A  79   O  GLU A 135           
SHEET    5 S2A 5 GLN A  88  LYS A  98 -1  N  VAL A  91   O  ARG A  82           
SHEET    1 S1B 5 LEU B  36  ALA B  38  0                                        
SHEET    2 S1B 5 PRO B  12  ALA B  18 -1  N  HIS B  15   O  LEU B  36           
SHEET    3 S1B 5 VAL B 150  LEU B 157 -1  O  VAL B 150   N  ALA B  18           
SHEET    4 S1B 5 GLY B  54  GLY B  68 -1  O  GLN B  61   N  TYR B 151           
SHEET    5 S1B 5 LYS B 112  LEU B 126 -1  N  LEU B 126   O  GLY B  54           
SHEET    1 S2B 5 GLU B  42  ARG B  44  0                                        
SHEET    2 S2B 5 GLN B  47  VAL B  50 -1  O  GLN B  47   N  ARG B  44           
SHEET    3 S2B 5 GLY B 129  ILE B 136 -1  N  GLY B 129   O  VAL B  50           
SHEET    4 S2B 5 LEU B  76  ALA B  84 -1  N  THR B  79   O  GLU B 135           
SHEET    5 S2B 5 GLN B  88  LYS B  98 -1  N  VAL B  91   O  ARG B  82           
SHEET    1 S1C 5 LEU C  36  ALA C  38  0                                        
SHEET    2 S1C 5 PRO C  12  ALA C  18 -1  N  HIS C  15   O  LEU C  36           
SHEET    3 S1C 5 VAL C 150  LEU C 157 -1  O  VAL C 150   N  ALA C  18           
SHEET    4 S1C 5 GLY C  54  GLY C  68 -1  O  GLN C  61   N  TYR C 151           
SHEET    5 S1C 5 LYS C 112  LEU C 126 -1  N  LEU C 126   O  GLY C  54           
SHEET    1 S2C 5 GLU C  42  ARG C  44  0                                        
SHEET    2 S2C 5 GLN C  47  VAL C  50 -1  O  GLN C  47   N  ARG C  44           
SHEET    3 S2C 5 GLY C 129  ILE C 136 -1  N  GLY C 129   O  VAL C  50           
SHEET    4 S2C 5 LEU C  76  ALA C  84 -1  N  THR C  79   O  GLU C 135           
SHEET    5 S2C 5 GLN C  88  LYS C  98 -1  N  VAL C  91   O  ARG C  82           
SSBOND   1 CYS A   69    CYS A  101                          1555   1555  1.99  
SSBOND   2 CYS B   69    CYS B  101                          1555   1555  2.03  
SSBOND   3 CYS C   69    CYS C  101                          1555   1555  2.02  
CRYST1   95.000   95.000  117.000  90.00  90.00  90.00 P 41 21 2    24          
ORIGX1      1.000000  0.000000  0.000000        0.00000                         
ORIGX2      0.000000  1.000000  0.000000        0.00000                         
ORIGX3      0.000000  0.000000  1.000000        0.00000                         
SCALE1      0.010526  0.000000  0.000000        0.00000                         
SCALE2      0.000000  0.010526  0.000000        0.00000                         
SCALE3      0.000000  0.000000  0.008547        0.00000                         
MTRIX1   1  0.040460 -0.105750  0.993570      -16.17000    1                    
MTRIX2   1 -0.980650  0.186430  0.059780       57.43000    1                    
MTRIX3   1 -0.191550 -0.976760 -0.096160       96.33000    1                    
MTRIX1   2 -0.028960 -0.992710 -0.116990       74.40000    1                    
MTRIX2   2 -0.202020  0.120440 -0.971950       87.33000    1                    
MTRIX3   2  0.978950 -0.004510 -0.204040       28.89000    1                    
MTRIX1   3 -0.012020 -0.163460  0.986460      -11.46000    1                    
MTRIX2   3 -0.986560  0.162730  0.014940       60.62000    1                    
MTRIX3   3 -0.162970 -0.973040 -0.163220       97.89000    1                    
ATOM      1  N   ARG A   6      29.842  48.919  61.586  1.00 39.68           N  
ATOM      2  CA  ARG A   6      31.034  48.617  62.363  1.00 41.52           C  
ATOM      3  C   ARG A   6      31.777  47.668  61.426  1.00 40.88           C  
ATOM      4  O   ARG A   6      31.635  47.872  60.214  1.00 39.93           O  
ATOM      5  CB  ARG A   6      30.699  47.888  63.665  1.00 40.94           C  
ATOM      6  N   THR A   7      32.515  46.661  61.862  1.00 38.88           N  
ATOM      7  CA  THR A   7      33.238  45.820  60.939  1.00 37.32           C  
ATOM      8  C   THR A   7      32.639  44.461  61.249  1.00 35.81           C  
ATOM      9  O   THR A   7      32.844  43.996  62.368  1.00 38.75           O  
ATOM     10  CB  THR A   7      34.737  45.950  61.317  1.00 38.85           C  
ATOM     11  OG1 THR A   7      35.001  47.356  61.436  1.00 37.13           O  
ATOM     12  CG2 THR A   7      35.673  45.269  60.320  1.00 38.78           C  
ATOM     13  N   PRO A   8      31.831  43.760  60.486  1.00 33.97           N  
ATOM     14  CA  PRO A   8      32.242  42.447  59.976  1.00 32.94           C  
ATOM     15  C   PRO A   8      33.203  42.383  58.808  1.00 32.17           C  
ATOM     16  O   PRO A   8      33.427  43.309  58.045  1.00 30.87           O  
ATOM     17  CB  PRO A   8      30.965  41.696  59.644  1.00 31.60           C  
ATOM     18  CG  PRO A   8      29.963  42.810  59.619  1.00 33.61           C  
ATOM     19  CD  PRO A   8      30.407  43.716  60.737  1.00 31.93           C  
ATOM     20  N   SER A   9      33.724  41.170  58.786  1.00 35.97           N  
ATOM     21  CA  SER A   9      34.629  40.613  57.806  1.00 38.87           C  
ATOM     22  C   SER A   9      35.975  41.307  57.557  1.00 40.16           C  
ATOM     23  O   SER A   9      36.183  42.491  57.855  1.00 40.43           O  
ATOM     24  CB  SER A   9      33.763  40.490  56.548  1.00 39.21           C  
ATOM     25  OG  SER A   9      32.557  39.807  56.872  1.00 43.46           O  
ATOM     26  N   ASP A  10      36.973  40.551  57.075  1.00 41.38           N  
ATOM     27  CA  ASP A  10      38.221  41.169  56.676  1.00 42.83           C  
ATOM     28  C   ASP A  10      38.068  41.514  55.187  1.00 40.20           C  
ATOM     29  O   ASP A  10      38.846  41.130  54.320  1.00 41.24           O  
ATOM     30  CB  ASP A  10      39.394  40.192  56.895  1.00 47.82           C  
ATOM     31  CG  ASP A  10      40.825  40.799  56.893  1.00 50.02           C  
ATOM     32  OD1 ASP A  10      41.790  40.011  56.996  1.00 51.28           O  
ATOM     33  OD2 ASP A  10      40.986  42.031  56.856  1.00 49.89           O  
ATOM     34  N   LYS A  11      37.045  42.270  54.837  1.00 36.66           N  
ATOM     35  CA  LYS A  11      36.819  42.605  53.450  1.00 33.31           C  
ATOM     36  C   LYS A  11      37.190  44.064  53.420  1.00 29.72           C  
ATOM     37  O   LYS A  11      36.903  44.729  54.406  1.00 31.69           O  
ATOM     38  CB  LYS A  11      35.348  42.466  53.056  1.00 32.40           C  
ATOM     39  CG  LYS A  11      34.705  41.181  53.484  1.00 31.67           C  
ATOM     40  CD  LYS A  11      35.441  39.921  53.091  1.00 33.63           C  
ATOM     41  CE  LYS A  11      34.910  39.417  51.762  1.00 36.45           C  
ATOM     42  NZ  LYS A  11      35.333  38.042  51.556  1.00 39.05           N  
ATOM     43  N   PRO A  12      37.815  44.675  52.420  1.00 26.99           N  
ATOM     44  CA  PRO A  12      37.670  46.106  52.186  1.00 25.68           C  
ATOM     45  C   PRO A  12      36.211  46.432  51.808  1.00 24.03           C  
ATOM     46  O   PRO A  12      35.604  45.729  50.988  1.00 28.09           O  
ATOM     47  CB  PRO A  12      38.721  46.369  51.085  1.00 26.10           C  
ATOM     48  CG  PRO A  12      39.744  45.260  51.206  1.00 22.94           C  
ATOM     49  CD  PRO A  12      38.820  44.081  51.540  1.00 27.22           C  
ATOM     50  N   VAL A  13      35.608  47.418  52.454  1.00 21.61           N  
ATOM     51  CA  VAL A  13      34.317  47.986  52.094  1.00 19.50           C  
ATOM     52  C   VAL A  13      34.551  49.465  52.182  1.00 18.39           C  
ATOM     53  O   VAL A  13      35.603  49.853  52.699  1.00 19.54           O  
ATOM     54  CB  VAL A  13      33.097  47.799  53.037  1.00 20.38           C  
ATOM     55  CG1 VAL A  13      32.385  46.553  52.627  1.00 21.65           C  
ATOM     56  CG2 VAL A  13      33.485  47.662  54.476  1.00 20.14           C  
ATOM     57  N   ALA A  14      33.562  50.234  51.717  1.00 17.40           N  
ATOM     58  CA  ALA A  14      33.465  51.686  51.784  1.00 17.15           C  
ATOM     59  C   ALA A  14      32.011  52.060  51.464  1.00 16.29           C  
ATOM     60  O   ALA A  14      31.342  51.341  50.711  1.00 22.23           O  
ATOM     61  CB  ALA A  14      34.347  52.384  50.744  1.00 12.97           C  
ATOM     62  N   HIS A  15      31.390  53.058  52.063  1.00 15.14           N  
ATOM     63  CA  HIS A  15      30.091  53.564  51.611  1.00 15.01           C  
ATOM     64  C   HIS A  15      30.183  55.008  52.047  1.00 15.15           C  
ATOM     65  O   HIS A  15      29.982  55.260  53.226  1.00 13.55           O  
ATOM     66  CB  HIS A  15      28.908  52.900  52.306  1.00 13.52           C  
ATOM     67  CG  HIS A  15      27.530  53.393  51.817  1.00 14.47           C  
ATOM     68  ND1 HIS A  15      26.521  52.618  51.405  1.00 16.61           N  
ATOM     69  CD2 HIS A  15      27.070  54.692  51.787  1.00 11.73           C  
ATOM     70  CE1 HIS A  15      25.500  53.371  51.139  1.00 15.26           C  
ATOM     71  NE2 HIS A  15      25.844  54.616  51.376  1.00 15.57           N  
ATOM     72  N   VAL A  16      30.565  55.883  51.126  1.00 14.92           N  
ATOM     73  CA  VAL A  16      30.718  57.314  51.377  1.00 18.41           C  
ATOM     74  C   VAL A  16      29.544  58.085  50.806  1.00 15.74           C  
ATOM     75  O   VAL A  16      28.855  57.534  49.934  1.00 17.64           O  
ATOM     76  CB  VAL A  16      32.065  57.854  50.763  1.00 21.61           C  
ATOM     77  CG1 VAL A  16      33.180  56.932  51.211  1.00 22.94           C  
ATOM     78  CG2 VAL A  16      32.058  57.898  49.242  1.00 25.48           C  
ATOM     79  N   VAL A  17      29.300  59.302  51.283  1.00 12.85           N  
ATOM     80  CA  VAL A  17      28.147  60.136  50.898  1.00 16.77           C  
ATOM     81  C   VAL A  17      28.491  61.561  50.493  1.00 19.54           C  
ATOM     82  O   VAL A  17      29.534  62.099  50.856  1.00 21.62           O  
ATOM     83  CB  VAL A  17      27.079  60.326  52.005  1.00 16.12           C  
ATOM     84  CG1 VAL A  17      25.948  59.331  51.760  1.00 15.95           C  
ATOM     85  CG2 VAL A  17      27.716  60.222  53.387  1.00 15.00           C  
ATOM     86  N   ALA A  18      27.582  62.192  49.758  1.00 19.08           N  
ATOM     87  CA  ALA A  18      27.783  63.518  49.242  1.00 19.98           C  
ATOM     88  C   ALA A  18      27.703  64.557  50.338  1.00 24.70           C  
ATOM     89  O   ALA A  18      26.717  64.629  51.069  1.00 27.66           O  
ATOM     90  CB  ALA A  18      26.733  63.834  48.240  1.00 14.88           C  
ATOM     91  N   ASN A  19      28.736  65.369  50.511  1.00 26.98           N  
ATOM     92  CA  ASN A  19      28.697  66.444  51.475  1.00 29.56           C  
ATOM     93  C   ASN A  19      27.568  67.410  51.167  1.00 31.18           C  
ATOM     94  O   ASN A  19      27.675  68.119  50.166  1.00 34.17           O  
ATOM     95  CB  ASN A  19      29.968  67.225  51.440  1.00 31.69           C  
ATOM     96  CG  ASN A  19      30.223  67.991  52.713  1.00 30.14           C  
ATOM     97  OD1 ASN A  19      31.337  67.987  53.217  1.00 31.47           O  
ATOM     98  ND2 ASN A  19      29.272  68.607  53.378  1.00 31.91           N  
ATOM     99  N   PRO A  20      26.507  67.558  51.978  1.00 30.98           N  
ATOM    100  CA  PRO A  20      25.362  68.355  51.594  1.00 32.11           C  
ATOM    101  C   PRO A  20      25.647  69.855  51.615  1.00 33.21           C  
ATOM    102  O   PRO A  20      24.921  70.657  51.032  1.00 34.35           O  
ATOM    103  CB  PRO A  20      24.290  67.863  52.544  1.00 29.61           C  
ATOM    104  CG  PRO A  20      25.072  67.583  53.794  1.00 30.40           C  
ATOM    105  CD  PRO A  20      26.309  66.899  53.266  1.00 30.32           C  
ATOM    106  N   GLN A  21      26.714  70.256  52.307  1.00 35.27           N  
ATOM    107  CA  GLN A  21      27.136  71.638  52.348  1.00 35.92           C  
ATOM    108  C   GLN A  21      28.384  71.574  51.498  1.00 34.52           C  
ATOM    109  O   GLN A  21      29.438  71.299  52.071  1.00 34.80           O  
ATOM    110  CB  GLN A  21      27.506  72.086  53.769  1.00 38.47           C  
ATOM    111  CG  GLN A  21      28.033  73.543  53.770  1.00 44.40           C  
ATOM    112  CD  GLN A  21      28.870  74.022  54.972  1.00 47.92           C  
ATOM    113  OE1 GLN A  21      29.225  75.204  55.083  1.00 48.53           O  
ATOM    114  NE2 GLN A  21      29.243  73.173  55.929  1.00 49.44           N  
ATOM    115  N   ALA A  22      28.237  71.643  50.172  1.00 33.19           N  
ATOM    116  CA  ALA A  22      29.323  71.741  49.182  1.00 32.62           C  
ATOM    117  C   ALA A  22      28.656  72.151  47.861  1.00 32.85           C  
ATOM    118  O   ALA A  22      27.941  71.509  47.091  1.00 29.76           O  
ATOM    119  CB  ALA A  22      30.080  70.420  48.947  1.00 32.26           C  
ATOM    120  N   GLU A  23      28.807  73.448  47.743  1.00 35.51           N  
ATOM    121  CA  GLU A  23      28.242  74.207  46.670  1.00 34.85           C  
ATOM    122  C   GLU A  23      28.951  73.833  45.386  1.00 33.80           C  
ATOM    123  O   GLU A  23      30.183  73.943  45.298  1.00 35.71           O  
ATOM    124  CB  GLU A  23      28.396  75.695  47.033  1.00 37.38           C  
ATOM    125  CG  GLU A  23      29.806  76.259  47.176  1.00 39.33           C  
ATOM    126  CD  GLU A  23      30.332  76.976  45.922  1.00 44.02           C  
ATOM    127  OE1 GLU A  23      31.532  77.244  45.898  1.00 48.17           O  
ATOM    128  OE2 GLU A  23      29.590  77.302  44.978  1.00 44.13           O  
ATOM    129  N   GLY A  24      28.132  73.200  44.531  1.00 31.92           N  
ATOM    130  CA  GLY A  24      28.479  72.887  43.135  1.00 26.01           C  
ATOM    131  C   GLY A  24      29.616  71.909  42.870  1.00 25.25           C  
ATOM    132  O   GLY A  24      30.474  72.144  42.021  1.00 23.85           O  
ATOM    133  N   GLN A  25      29.627  70.755  43.516  1.00 23.41           N  
ATOM    134  CA  GLN A  25      30.721  69.819  43.327  1.00 27.35           C  
ATOM    135  C   GLN A  25      30.283  68.482  43.939  1.00 24.58           C  
ATOM    136  O   GLN A  25      29.529  68.502  44.906  1.00 25.17           O  
ATOM    137  CB  GLN A  25      32.012  70.437  44.015  1.00 31.76           C  
ATOM    138  CG  GLN A  25      33.164  69.436  44.295  1.00 37.97           C  
ATOM    139  CD  GLN A  25      34.315  69.819  45.247  1.00 38.59           C  
ATOM    140  OE1 GLN A  25      35.300  69.080  45.390  1.00 37.64           O  
ATOM    141  NE2 GLN A  25      34.290  70.949  45.932  1.00 40.91           N  
ATOM    142  N   LEU A  26      30.589  67.288  43.423  1.00 22.66           N  
ATOM    143  CA  LEU A  26      30.251  66.086  44.168  1.00 18.95           C  
ATOM    144  C   LEU A  26      31.556  65.846  44.895  1.00 19.93           C  
ATOM    145  O   LEU A  26      32.664  65.876  44.347  1.00 21.46           O  
ATOM    146  CB  LEU A  26      29.915  64.900  43.273  1.00 16.35           C  
ATOM    147  CG  LEU A  26      29.431  63.548  43.858  1.00 17.85           C  
ATOM    148  CD1 LEU A  26      28.380  63.670  44.971  1.00 12.55           C  
ATOM    149  CD2 LEU A  26      28.878  62.770  42.661  1.00 16.95           C  
ATOM    150  N   GLN A  27      31.342  65.831  46.187  1.00 18.54           N  
ATOM    151  CA  GLN A  27      32.400  65.702  47.149  1.00 22.02           C  
ATOM    152  C   GLN A  27      31.932  64.645  48.120  1.00 23.10           C  
ATOM    153  O   GLN A  27      30.808  64.729  48.659  1.00 22.54           O  
ATOM    154  CB  GLN A  27      32.569  67.005  47.845  1.00 21.16           C  
ATOM    155  CG  GLN A  27      33.972  67.205  48.322  1.00 23.99           C  
ATOM    156  CD  GLN A  27      33.913  68.364  49.287  1.00 28.46           C  
ATOM    157  OE1 GLN A  27      33.748  69.526  48.885  1.00 31.39           O  
ATOM    158  NE2 GLN A  27      33.956  68.061  50.590  1.00 27.65           N  
ATOM    159  N   TRP A  28      32.770  63.625  48.272  1.00 21.53           N  
ATOM    160  CA  TRP A  28      32.399  62.536  49.156  1.00 24.26           C  
ATOM    161  C   TRP A  28      32.691  62.806  50.614  1.00 26.64           C  
ATOM    162  O   TRP A  28      33.332  63.806  50.947  1.00 29.80           O  
ATOM    163  CB  TRP A  28      33.092  61.284  48.710  1.00 22.48           C  
ATOM    164  CG  TRP A  28      32.548  60.914  47.348  1.00 21.19           C  
ATOM    165  CD1 TRP A  28      33.401  60.826  46.286  1.00 20.89           C  
ATOM    166  CD2 TRP A  28      31.232  60.696  47.024  1.00 21.11           C  
ATOM    167  NE1 TRP A  28      32.636  60.575  45.273  1.00 18.13           N  
ATOM    168  CE2 TRP A  28      31.341  60.479  45.651  1.00 21.52           C  
ATOM    169  CE3 TRP A  28      30.003  60.652  47.651  1.00 20.70           C  
ATOM    170  CZ2 TRP A  28      30.219  60.209  44.879  1.00 19.27           C  
ATOM    171  CZ3 TRP A  28      28.883  60.391  46.896  1.00 22.28           C  
ATOM    172  CH2 TRP A  28      28.996  60.174  45.520  1.00 23.65           C  
ATOM    173  N   LEU A  29      32.196  61.912  51.470  1.00 30.47           N  
ATOM    174  CA  LEU A  29      32.212  62.064  52.927  1.00 32.94           C  
ATOM    175  C   LEU A  29      32.065  60.695  53.570  1.00 36.83           C  
ATOM    176  O   LEU A  29      31.418  59.843  52.964  1.00 37.74           O  
ATOM    177  CB  LEU A  29      31.013  62.880  53.396  1.00 30.36           C  
ATOM    178  CG  LEU A  29      31.134  64.073  54.241  1.00 25.77           C  
ATOM    179  CD1 LEU A  29      31.936  65.099  53.513  1.00 26.01           C  
ATOM    180  CD2 LEU A  29      29.753  64.572  54.559  1.00 28.52           C  
ATOM    181  N   ASN A  30      32.590  60.375  54.751  1.00 43.17           N  
ATOM    182  CA  ASN A  30      32.221  59.107  55.386  1.00 47.00           C  
ATOM    183  C   ASN A  30      31.769  59.513  56.790  1.00 47.64           C  
ATOM    184  O   ASN A  30      30.983  60.454  56.797  1.00 48.92           O  
ATOM    185  CB  ASN A  30      33.406  58.116  55.401  1.00 48.42           C  
ATOM    186  CG  ASN A  30      34.702  58.743  55.844  1.00 50.78           C  
ATOM    187  OD1 ASN A  30      34.807  59.265  56.948  1.00 53.49           O  
ATOM    188  ND2 ASN A  30      35.709  58.760  54.985  1.00 51.77           N  
ATOM    189  N   ARG A  31      32.080  58.976  57.965  1.00 49.82           N  
ATOM    190  CA  ARG A  31      31.572  59.383  59.302  1.00 54.96           C  
ATOM    191  C   ARG A  31      30.061  59.315  59.569  1.00 55.30           C  
ATOM    192  O   ARG A  31      29.680  59.080  60.720  1.00 55.18           O  
ATOM    193  CB  ARG A  31      31.996  60.833  59.708  1.00 55.55           C  
ATOM    194  CG  ARG A  31      31.132  62.024  59.242  1.00 58.05           C  
ATOM    195  CD  ARG A  31      31.993  63.238  58.967  1.00 58.87           C  
ATOM    196  NE  ARG A  31      33.081  62.895  58.063  1.00 61.77           N  
ATOM    197  CZ  ARG A  31      34.031  63.784  57.744  1.00 64.08           C  
ATOM    198  NH1 ARG A  31      35.026  63.396  56.931  1.00 62.80           N  
ATOM    199  NH2 ARG A  31      33.980  65.058  58.194  1.00 64.51           N  
ATOM    200  N   ARG A  32      29.213  59.561  58.549  1.00 54.64           N  
ATOM    201  CA  ARG A  32      27.765  59.548  58.600  1.00 52.37           C  
ATOM    202  C   ARG A  32      27.159  58.179  58.897  1.00 50.97           C  
ATOM    203  O   ARG A  32      27.846  57.237  59.294  1.00 50.23           O  
ATOM    204  CB  ARG A  32      27.256  60.066  57.268  1.00 50.95           C  
ATOM    205  CG  ARG A  32      26.076  60.945  57.576  1.00 53.11           C  
ATOM    206  CD  ARG A  32      25.000  60.945  56.521  1.00 53.15           C  
ATOM    207  NE  ARG A  32      25.355  61.857  55.472  1.00 53.46           N  
ATOM    208  CZ  ARG A  32      24.652  62.909  55.083  1.00 53.31           C  
ATOM    209  NH1 ARG A  32      25.132  63.611  54.060  1.00 55.38           N  
ATOM    210  NH2 ARG A  32      23.523  63.286  55.654  1.00 49.48           N  
ATOM    211  N   ALA A  33      25.867  58.046  58.624  1.00 49.92           N  
ATOM    212  CA  ALA A  33      25.138  56.843  58.887  1.00 53.01           C  
ATOM    213  C   ALA A  33      25.797  55.495  58.631  1.00 55.12           C  
ATOM    214  O   ALA A  33      26.086  54.706  59.542  1.00 56.64           O  
ATOM    215  CB  ALA A  33      23.838  56.887  58.106  1.00 53.63           C  
ATOM    216  N   ASN A  34      26.019  55.227  57.354  1.00 54.60           N  
ATOM    217  CA  ASN A  34      26.636  53.976  56.964  1.00 53.71           C  
ATOM    218  C   ASN A  34      27.679  54.519  56.055  1.00 51.32           C  
ATOM    219  O   ASN A  34      27.590  54.480  54.819  1.00 51.25           O  
ATOM    220  CB  ASN A  34      25.674  53.106  56.195  1.00 56.05           C  
ATOM    221  CG  ASN A  34      24.841  52.294  57.152  1.00 57.85           C  
ATOM    222  OD1 ASN A  34      25.282  51.252  57.644  1.00 58.19           O  
ATOM    223  ND2 ASN A  34      23.611  52.757  57.393  1.00 57.98           N  
ATOM    224  N   ALA A  35      28.577  55.201  56.727  1.00 48.07           N  
ATOM    225  CA  ALA A  35      29.590  55.831  55.951  1.00 47.43           C  
ATOM    226  C   ALA A  35      30.916  55.194  56.338  1.00 46.77           C  
ATOM    227  O   ALA A  35      31.735  55.677  57.147  1.00 47.25           O  
ATOM    228  CB  ALA A  35      29.473  57.308  56.231  1.00 45.10           C  
ATOM    229  N   LEU A  36      31.021  54.007  55.718  1.00 42.77           N  
ATOM    230  CA  LEU A  36      32.108  53.095  56.010  1.00 37.92           C  
ATOM    231  C   LEU A  36      33.367  53.392  55.253  1.00 35.46           C  
ATOM    232  O   LEU A  36      33.309  53.772  54.082  1.00 36.94           O  
ATOM    233  CB  LEU A  36      31.766  51.643  55.680  1.00 35.87           C  
ATOM    234  CG  LEU A  36      30.817  50.887  56.592  1.00 36.51           C  
ATOM    235  CD1 LEU A  36      29.365  50.997  56.113  1.00 33.66           C  
ATOM    236  CD2 LEU A  36      31.304  49.443  56.648  1.00 35.35           C  
ATOM    237  N   LEU A  37      34.488  53.242  55.931  1.00 32.05           N  
ATOM    238  CA  LEU A  37      35.792  53.212  55.268  1.00 30.74           C  
ATOM    239  C   LEU A  37      36.322  52.186  56.211  1.00 29.22           C  
ATOM    240  O   LEU A  37      36.319  52.417  57.425  1.00 31.28           O  
ATOM    241  CB  LEU A  37      36.687  54.431  55.434  1.00 29.41           C  
ATOM    242  CG  LEU A  37      37.258  55.078  54.188  1.00 29.27           C  
ATOM    243  CD1 LEU A  37      36.170  55.805  53.403  1.00 29.15           C  
ATOM    244  CD2 LEU A  37      38.280  56.113  54.596  1.00 28.92           C  
ATOM    245  N   ALA A  38      36.611  51.022  55.649  1.00 29.86           N  
ATOM    246  CA  ALA A  38      37.101  49.900  56.398  1.00 26.54           C  
ATOM    247  C   ALA A  38      38.504  49.440  56.013  1.00 26.52           C  
ATOM    248  O   ALA A  38      39.414  50.265  55.850  1.00 28.92           O  
ATOM    249  CB  ALA A  38      36.068  48.763  56.265  1.00 29.06           C  
ATOM    250  N   ASN A  39      38.705  48.152  55.788  1.00 24.56           N  
ATOM    251  CA  ASN A  39      40.013  47.531  55.755  1.00 22.91           C  
ATOM    252  C   ASN A  39      40.925  47.976  54.618  1.00 25.44           C  
ATOM    253  O   ASN A  39      41.083  47.294  53.585  1.00 27.15           O  
ATOM    254  CB  ASN A  39      39.825  45.977  55.730  1.00 23.29           C  
ATOM    255  CG  ASN A  39      38.707  45.373  56.615  1.00 23.36           C  
ATOM    256  OD1 ASN A  39      37.711  46.033  56.896  1.00 22.72           O  
ATOM    257  ND2 ASN A  39      38.707  44.139  57.075  1.00 18.97           N  
ATOM    258  N   GLY A  40      41.511  49.163  54.753  1.00 23.38           N  
ATOM    259  CA  GLY A  40      42.540  49.564  53.804  1.00 27.47           C  
ATOM    260  C   GLY A  40      42.092  50.446  52.656  1.00 27.86           C  
ATOM    261  O   GLY A  40      42.889  50.864  51.807  1.00 26.24           O  
ATOM    262  N   VAL A  41      40.788  50.674  52.616  1.00 27.79           N  
ATOM    263  CA  VAL A  41      40.220  51.553  51.637  1.00 23.75           C  
ATOM    264  C   VAL A  41      40.477  52.891  52.282  1.00 22.85           C  
ATOM    265  O   VAL A  41      40.219  53.108  53.456  1.00 23.30           O  
ATOM    266  CB  VAL A  41      38.754  51.248  51.489  1.00 22.85           C  
ATOM    267  CG1 VAL A  41      38.056  52.213  50.555  1.00 27.69           C  
ATOM    268  CG2 VAL A  41      38.650  49.881  50.879  1.00 22.40           C  
ATOM    269  N   GLU A  42      41.066  53.739  51.469  1.00 27.81           N  
ATOM    270  CA  GLU A  42      41.473  55.084  51.810  1.00 27.32           C  
ATOM    271  C   GLU A  42      40.745  55.952  50.788  1.00 25.71           C  
ATOM    272  O   GLU A  42      40.790  55.670  49.587  1.00 25.92           O  
ATOM    273  CB  GLU A  42      42.958  55.179  51.612  1.00 29.74           C  
ATOM    274  CG  GLU A  42      43.670  56.455  51.967  1.00 34.34           C  
ATOM    275  CD  GLU A  42      44.211  56.527  53.408  1.00 38.12           C  
ATOM    276  OE1 GLU A  42      44.209  57.652  53.967  1.00 36.66           O  
ATOM    277  OE2 GLU A  42      44.637  55.477  53.940  1.00 36.25           O  
ATOM    278  N   LEU A  43      40.025  56.954  51.258  1.00 21.99           N  
ATOM    279  CA  LEU A  43      39.368  57.938  50.419  1.00 20.77           C  
ATOM    280  C   LEU A  43      40.381  59.054  50.275  1.00 20.50           C  
ATOM    281  O   LEU A  43      41.060  59.365  51.230  1.00 20.29           O  
ATOM    282  CB  LEU A  43      38.132  58.315  51.171  1.00 21.91           C  
ATOM    283  CG  LEU A  43      37.023  59.256  50.789  1.00 20.32           C  
ATOM    284  CD1 LEU A  43      37.101  60.309  51.878  1.00 23.92           C  
ATOM    285  CD2 LEU A  43      37.098  59.808  49.370  1.00 22.24           C  
ATOM    286  N   ARG A  44      40.625  59.628  49.120  1.00 23.75           N  
ATOM    287  CA  ARG A  44      41.651  60.638  49.049  1.00 26.89           C  
ATOM    288  C   ARG A  44      41.126  61.955  48.469  1.00 25.77           C  
ATOM    289  O   ARG A  44      40.326  62.657  49.112  1.00 23.38           O  
ATOM    290  CB  ARG A  44      42.797  59.937  48.262  1.00 29.89           C  
ATOM    291  CG  ARG A  44      44.260  60.227  48.631  1.00 36.00           C  
ATOM    292  CD  ARG A  44      44.855  59.822  50.002  1.00 40.28           C  
ATOM    293  NE  ARG A  44      46.157  60.497  50.097  1.00 44.47           N  
ATOM    294  CZ  ARG A  44      46.607  61.210  51.154  1.00 45.70           C  
ATOM    295  NH1 ARG A  44      47.724  61.927  50.968  1.00 46.55           N  
ATOM    296  NH2 ARG A  44      46.069  61.163  52.393  1.00 46.12           N  
ATOM    297  N   ASP A  45      41.489  62.323  47.238  1.00 23.15           N  
ATOM    298  CA  ASP A  45      41.152  63.601  46.605  1.00 19.93           C  
ATOM    299  C   ASP A  45      39.832  63.450  45.887  1.00 16.09           C  
ATOM    300  O   ASP A  45      39.772  63.464  44.649  1.00 21.74           O  
ATOM    301  CB  ASP A  45      42.217  63.923  45.605  1.00 21.50           C  
ATOM    302  CG  ASP A  45      43.612  63.945  46.161  1.00 23.86           C  
ATOM    303  OD1 ASP A  45      44.132  62.907  46.570  1.00 25.32           O  
ATOM    304  OD2 ASP A  45      44.191  65.026  46.155  1.00 28.39           O  
ATOM    305  N   ASN A  46      38.792  63.221  46.662  1.00 10.26           N  
ATOM    306  CA  ASN A  46      37.447  62.890  46.206  1.00 11.24           C  
ATOM    307  C   ASN A  46      37.329  61.463  45.597  1.00 14.96           C  
ATOM    308  O   ASN A  46      36.331  61.161  44.912  1.00 13.64           O  
ATOM    309  CB  ASN A  46      36.991  63.902  45.179  1.00  6.68           C  
ATOM    310  CG  ASN A  46      35.599  64.415  45.400  1.00 10.32           C  
ATOM    311  OD1 ASN A  46      34.721  63.769  45.953  1.00 12.79           O  
ATOM    312  ND2 ASN A  46      35.344  65.664  45.066  1.00 15.47           N  
ATOM    313  N   GLN A  47      38.314  60.530  45.861  1.00 13.07           N  
ATOM    314  CA  GLN A  47      38.394  59.223  45.192  1.00 11.44           C  
ATOM    315  C   GLN A  47      38.698  58.021  46.047  1.00  8.36           C  
ATOM    316  O   GLN A  47      39.264  58.239  47.093  1.00  9.82           O  
ATOM    317  CB  GLN A  47      39.450  59.242  44.137  1.00 15.31           C  
ATOM    318  CG  GLN A  47      39.272  60.321  43.106  1.00 16.79           C  
ATOM    319  CD  GLN A  47      40.369  60.254  42.067  1.00 20.97           C  
ATOM    320  OE1 GLN A  47      40.758  59.166  41.660  1.00 22.48           O  
ATOM    321  NE2 GLN A  47      40.935  61.354  41.591  1.00 19.69           N  
ATOM    322  N   LEU A  48      38.430  56.779  45.700  1.00  7.96           N  
ATOM    323  CA  LEU A  48      38.734  55.639  46.560  1.00 11.62           C  
ATOM    324  C   LEU A  48      39.976  54.853  46.150  1.00 15.40           C  
ATOM    325  O   LEU A  48      40.046  54.390  45.020  1.00 20.50           O  
ATOM    326  CB  LEU A  48      37.518  54.700  46.592  1.00  9.21           C  
ATOM    327  CG  LEU A  48      36.401  54.895  47.647  1.00 12.33           C  
ATOM    328  CD1 LEU A  48      36.673  56.180  48.430  1.00 12.65           C  
ATOM    329  CD2 LEU A  48      35.027  54.930  47.004  1.00  5.83           C  
ATOM    330  N   VAL A  49      41.023  54.741  46.946  1.00 20.06           N  
ATOM    331  CA  VAL A  49      42.199  53.968  46.570  1.00 24.56           C  
ATOM    332  C   VAL A  49      41.959  52.547  47.066  1.00 28.11           C  
ATOM    333  O   VAL A  49      41.651  52.293  48.239  1.00 27.53           O  
ATOM    334  CB  VAL A  49      43.557  54.482  47.215  1.00 23.38           C  
ATOM    335  CG1 VAL A  49      44.689  53.447  46.959  1.00 19.09           C  
ATOM    336  CG2 VAL A  49      43.945  55.847  46.624  1.00 17.48           C  
ATOM    337  N   VAL A  50      42.079  51.663  46.073  1.00 31.22           N  
ATOM    338  CA  VAL A  50      41.972  50.234  46.312  1.00 31.44           C  
ATOM    339  C   VAL A  50      43.174  49.609  47.066  1.00 32.44           C  
ATOM    340  O   VAL A  50      44.346  49.747  46.699  1.00 29.34           O  
ATOM    341  CB  VAL A  50      41.737  49.596  44.927  1.00 29.88           C  
ATOM    342  CG1 VAL A  50      41.709  48.072  45.011  1.00 30.05           C  
ATOM    343  CG2 VAL A  50      40.405  50.123  44.410  1.00 27.21           C  
ATOM    344  N   PRO A  51      42.906  48.890  48.159  1.00 34.92           N  
ATOM    345  CA  PRO A  51      43.892  48.042  48.845  1.00 32.18           C  
ATOM    346  C   PRO A  51      44.293  46.681  48.274  1.00 29.76           C  
ATOM    347  O   PRO A  51      45.477  46.360  48.280  1.00 24.27           O  
ATOM    348  CB  PRO A  51      43.318  47.930  50.230  1.00 32.83           C  
ATOM    349  CG  PRO A  51      41.836  47.894  49.955  1.00 34.85           C  
ATOM    350  CD  PRO A  51      41.676  49.024  48.962  1.00 34.29           C  
ATOM    351  N   SER A  52      43.365  45.883  47.735  1.00 32.00           N  
ATOM    352  CA  SER A  52      43.637  44.474  47.422  1.00 31.77           C  
ATOM    353  C   SER A  52      43.231  43.993  46.020  1.00 30.11           C  
ATOM    354  O   SER A  52      42.378  44.567  45.338  1.00 28.56           O  
ATOM    355  CB  SER A  52      42.947  43.604  48.480  1.00 29.47           C  
ATOM    356  OG  SER A  52      42.864  44.295  49.733  1.00 31.58           O  
ATOM    357  N   GLU A  53      43.927  42.959  45.530  1.00 28.01           N  
ATOM    358  CA  GLU A  53      43.614  42.468  44.216  1.00 28.07           C  
ATOM    359  C   GLU A  53      42.422  41.598  44.559  1.00 28.08           C  
ATOM    360  O   GLU A  53      42.456  40.876  45.565  1.00 28.60           O  
ATOM    361  CB  GLU A  53      44.775  41.644  43.594  1.00 30.65           C  
ATOM    362  CG  GLU A  53      44.898  42.040  42.088  1.00 35.56           C  
ATOM    363  CD  GLU A  53      45.825  41.286  41.106  1.00 35.62           C  
ATOM    364  OE1 GLU A  53      45.303  40.537  40.291  1.00 37.02           O  
ATOM    365  OE2 GLU A  53      47.049  41.465  41.091  1.00 35.27           O  
ATOM    366  N   GLY A  54      41.326  41.809  43.840  1.00 27.71           N  
ATOM    367  CA  GLY A  54      40.138  40.996  44.029  1.00 28.17           C  
ATOM    368  C   GLY A  54      38.957  41.580  43.279  1.00 28.24           C  
ATOM    369  O   GLY A  54      39.094  42.591  42.562  1.00 28.46           O  
ATOM    370  N   LEU A  55      37.814  40.900  43.378  1.00 25.44           N  
ATOM    371  CA  LEU A  55      36.605  41.414  42.791  1.00 23.62           C  
ATOM    372  C   LEU A  55      36.044  42.394  43.799  1.00 23.67           C  
ATOM    373  O   LEU A  55      36.220  42.200  45.008  1.00 29.37           O  
ATOM    374  CB  LEU A  55      35.630  40.302  42.558  1.00 22.23           C  
ATOM    375  CG  LEU A  55      35.713  39.531  41.248  1.00 24.33           C  
ATOM    376  CD1 LEU A  55      37.055  39.769  40.551  1.00 23.62           C  
ATOM    377  CD2 LEU A  55      35.426  38.049  41.564  1.00 22.15           C  
ATOM    378  N   TYR A  56      35.458  43.488  43.337  1.00 19.56           N  
ATOM    379  CA  TYR A  56      34.814  44.419  44.224  1.00 17.05           C  
ATOM    380  C   TYR A  56      33.446  44.602  43.600  1.00 13.43           C  
ATOM    381  O   TYR A  56      33.239  44.313  42.435  1.00 14.34           O  
ATOM    382  CB  TYR A  56      35.551  45.803  44.308  1.00 18.91           C  
ATOM    383  CG  TYR A  56      36.854  45.786  45.097  1.00 17.67           C  
ATOM    384  CD1 TYR A  56      37.981  45.183  44.561  1.00 19.66           C  
ATOM    385  CD2 TYR A  56      36.921  46.316  46.361  1.00 19.13           C  
ATOM    386  CE1 TYR A  56      39.159  45.096  45.270  1.00 17.87           C  
ATOM    387  CE2 TYR A  56      38.105  46.237  47.078  1.00 18.10           C  
ATOM    388  CZ  TYR A  56      39.216  45.624  46.534  1.00 17.03           C  
ATOM    389  OH  TYR A  56      40.391  45.504  47.264  1.00 16.58           O  
ATOM    390  N   LEU A  57      32.470  45.002  44.395  1.00 13.44           N  
ATOM    391  CA  LEU A  57      31.148  45.328  43.942  1.00 12.21           C  
ATOM    392  C   LEU A  57      31.218  46.846  44.100  1.00 15.67           C  
ATOM    393  O   LEU A  57      31.537  47.334  45.191  1.00 18.49           O  
ATOM    394  CB  LEU A  57      30.141  44.721  44.874  1.00  9.72           C  
ATOM    395  CG  LEU A  57      28.999  44.024  44.268  1.00 11.19           C  
ATOM    396  CD1 LEU A  57      28.168  43.305  45.331  1.00 16.60           C  
ATOM    397  CD2 LEU A  57      28.140  45.058  43.597  1.00 14.21           C  
ATOM    398  N   ILE A  58      30.996  47.588  43.013  1.00 14.79           N  
ATOM    399  CA  ILE A  58      31.100  49.034  43.011  1.00 13.92           C  
ATOM    400  C   ILE A  58      29.676  49.441  42.703  1.00 14.63           C  
ATOM    401  O   ILE A  58      29.155  49.010  41.673  1.00 15.44           O  
ATOM    402  CB  ILE A  58      32.059  49.537  41.893  1.00 14.35           C  
ATOM    403  CG1 ILE A  58      33.372  48.708  41.847  1.00 16.06           C  
ATOM    404  CG2 ILE A  58      32.385  50.993  42.182  1.00 14.13           C  
ATOM    405  CD1 ILE A  58      34.396  48.966  40.705  1.00 14.24           C  
ATOM    406  N   TYR A  59      29.015  50.174  43.590  1.00 14.55           N  
ATOM    407  CA  TYR A  59      27.627  50.596  43.383  1.00 15.88           C  
ATOM    408  C   TYR A  59      27.581  52.081  43.563  1.00 13.56           C  
ATOM    409  O   TYR A  59      28.535  52.561  44.173  1.00 18.97           O  
ATOM    410  CB  TYR A  59      26.624  50.002  44.390  1.00 11.99           C  
ATOM    411  CG  TYR A  59      26.997  50.138  45.850  1.00 14.27           C  
ATOM    412  CD1 TYR A  59      26.601  51.261  46.587  1.00 15.44           C  
ATOM    413  CD2 TYR A  59      27.689  49.102  46.454  1.00 14.29           C  
ATOM    414  CE1 TYR A  59      26.884  51.352  47.943  1.00 13.98           C  
ATOM    415  CE2 TYR A  59      27.976  49.195  47.802  1.00 15.81           C  
ATOM    416  CZ  TYR A  59      27.569  50.307  48.543  1.00 15.33           C  
ATOM    417  OH  TYR A  59      27.782  50.340  49.920  1.00 18.55           O  
ATOM    418  N   SER A  60      26.559  52.809  43.140  1.00 11.06           N  
ATOM    419  CA  SER A  60      26.482  54.233  43.474  1.00 10.79           C  
ATOM    420  C   SER A  60      25.092  54.768  43.149  1.00  9.66           C  
ATOM    421  O   SER A  60      24.489  54.357  42.143  1.00 10.08           O  
ATOM    422  CB  SER A  60      27.590  54.997  42.688  1.00  8.82           C  
ATOM    423  OG  SER A  60      27.639  56.411  42.729  1.00 12.35           O  
ATOM    424  N   GLN A  61      24.521  55.639  43.961  1.00  6.73           N  
ATOM    425  CA  GLN A  61      23.271  56.220  43.512  1.00 10.16           C  
ATOM    426  C   GLN A  61      23.359  57.736  43.584  1.00 11.20           C  
ATOM    427  O   GLN A  61      24.125  58.226  44.417  1.00 15.41           O  
ATOM    428  CB  GLN A  61      22.145  55.754  44.375  1.00 13.56           C  
ATOM    429  CG  GLN A  61      20.782  56.209  43.812  1.00 15.82           C  
ATOM    430  CD  GLN A  61      19.622  56.328  44.794  1.00 11.97           C  
ATOM    431  OE1 GLN A  61      19.016  55.353  45.248  1.00  9.86           O  
ATOM    432  NE2 GLN A  61      19.380  57.595  45.070  1.00  6.05           N  
ATOM    433  N   VAL A  62      22.715  58.527  42.727  1.00 11.04           N  
ATOM    434  CA  VAL A  62      22.628  59.986  42.905  1.00 12.91           C  
ATOM    435  C   VAL A  62      21.198  60.318  42.572  1.00 13.69           C  
ATOM    436  O   VAL A  62      20.440  59.532  41.979  1.00 19.64           O  
ATOM    437  CB  VAL A  62      23.454  60.903  41.983  1.00 11.86           C  
ATOM    438  CG1 VAL A  62      24.898  60.621  42.220  1.00 14.88           C  
ATOM    439  CG2 VAL A  62      23.169  60.666  40.532  1.00 17.68           C  
ATOM    440  N   LEU A  63      20.790  61.493  42.964  1.00 13.71           N  
ATOM    441  CA  LEU A  63      19.415  61.871  42.788  1.00 12.38           C  
ATOM    442  C   LEU A  63      19.516  63.198  42.116  1.00 16.17           C  
ATOM    443  O   LEU A  63      20.505  63.904  42.312  1.00 20.45           O  
ATOM    444  CB  LEU A  63      18.728  62.049  44.114  1.00 12.09           C  
ATOM    445  CG  LEU A  63      18.338  60.885  44.993  1.00 11.55           C  
ATOM    446  CD1 LEU A  63      17.260  61.360  45.923  1.00 14.43           C  
ATOM    447  CD2 LEU A  63      17.625  59.820  44.239  1.00 17.26           C  
ATOM    448  N   PHE A  64      18.549  63.608  41.330  1.00 18.17           N  
ATOM    449  CA  PHE A  64      18.622  64.933  40.759  1.00 17.89           C  
ATOM    450  C   PHE A  64      17.244  65.534  40.933  1.00 20.82           C  
ATOM    451  O   PHE A  64      16.227  64.817  40.866  1.00 25.14           O  
ATOM    452  CB  PHE A  64      18.996  64.847  39.303  1.00 16.97           C  
ATOM    453  CG  PHE A  64      20.438  64.479  39.019  1.00 12.46           C  
ATOM    454  CD1 PHE A  64      20.772  63.193  38.612  1.00 12.31           C  
ATOM    455  CD2 PHE A  64      21.402  65.447  39.072  1.00 10.95           C  
ATOM    456  CE1 PHE A  64      22.074  62.897  38.243  1.00 11.38           C  
ATOM    457  CE2 PHE A  64      22.692  65.144  38.705  1.00 10.69           C  
ATOM    458  CZ  PHE A  64      23.031  63.877  38.288  1.00 11.54           C  
ATOM    459  N   LYS A  65      17.178  66.820  41.231  1.00 20.18           N  
ATOM    460  CA  LYS A  65      15.910  67.483  41.417  1.00 18.20           C  
ATOM    461  C   LYS A  65      16.097  68.740  40.607  1.00 21.53           C  
ATOM    462  O   LYS A  65      17.202  69.179  40.285  1.00 21.80           O  
ATOM    463  CB  LYS A  65      15.673  67.814  42.904  1.00 16.46           C  
ATOM    464  CG  LYS A  65      15.964  69.208  43.446  1.00 16.99           C  
ATOM    465  CD  LYS A  65      17.462  69.634  43.405  1.00 23.91           C  
ATOM    466  CE  LYS A  65      17.711  71.155  43.622  1.00 26.95           C  
ATOM    467  NZ  LYS A  65      18.351  71.362  44.916  1.00 31.59           N  
ATOM    468  N   GLY A  66      15.000  69.359  40.318  1.00 25.99           N  
ATOM    469  CA  GLY A  66      14.927  70.613  39.609  1.00 28.23           C  
ATOM    470  C   GLY A  66      13.456  70.968  39.743  1.00 30.38           C  
ATOM    471  O   GLY A  66      12.640  70.176  40.268  1.00 25.49           O  
ATOM    472  N   GLN A  67      13.087  72.166  39.326  1.00 31.64           N  
ATOM    473  CA  GLN A  67      11.708  72.597  39.468  1.00 35.19           C  
ATOM    474  C   GLN A  67      11.482  73.261  38.136  1.00 35.97           C  
ATOM    475  O   GLN A  67      12.094  74.310  37.913  1.00 38.06           O  
ATOM    476  CB  GLN A  67      11.629  73.567  40.603  1.00 33.52           C  
ATOM    477  CG  GLN A  67      10.291  73.535  41.247  1.00 33.62           C  
ATOM    478  CD  GLN A  67      10.094  74.816  42.030  1.00 36.03           C  
ATOM    479  OE1 GLN A  67      11.011  75.610  42.205  1.00 36.50           O  
ATOM    480  NE2 GLN A  67       8.892  75.128  42.488  1.00 38.44           N  
ATOM    481  N   GLY A  68      10.715  72.657  37.228  1.00 35.20           N  
ATOM    482  CA  GLY A  68      10.610  73.243  35.917  1.00 36.63           C  
ATOM    483  C   GLY A  68      11.881  72.990  35.081  1.00 38.01           C  
ATOM    484  O   GLY A  68      13.055  72.797  35.454  1.00 31.93           O  
ATOM    485  N   CYS A  69      11.505  72.986  33.832  1.00 41.94           N  
ATOM    486  CA  CYS A  69      12.430  72.603  32.811  1.00 45.94           C  
ATOM    487  C   CYS A  69      12.744  73.807  31.993  1.00 49.60           C  
ATOM    488  O   CYS A  69      11.815  74.449  31.490  1.00 48.80           O  
ATOM    489  CB  CYS A  69      11.760  71.512  32.054  1.00 46.17           C  
ATOM    490  SG  CYS A  69      12.139  70.139  33.164  1.00 48.93           S  
ATOM    491  N   PRO A  70      14.047  74.140  31.989  1.00 54.77           N  
ATOM    492  CA  PRO A  70      14.571  75.455  31.590  1.00 55.79           C  
ATOM    493  C   PRO A  70      14.790  75.429  30.078  1.00 57.27           C  
ATOM    494  O   PRO A  70      13.928  74.975  29.303  1.00 56.55           O  
ATOM    495  CB  PRO A  70      15.819  75.532  32.458  1.00 55.59           C  
ATOM    496  CG  PRO A  70      16.408  74.125  32.321  1.00 55.73           C  
ATOM    497  CD  PRO A  70      15.145  73.224  32.381  1.00 54.85           C  
ATOM    498  N   SER A  71      15.996  75.772  29.624  1.00 59.64           N  
ATOM    499  CA  SER A  71      16.206  75.709  28.199  1.00 63.63           C  
ATOM    500  C   SER A  71      16.465  74.276  27.747  1.00 62.56           C  
ATOM    501  O   SER A  71      17.447  73.595  28.071  1.00 62.27           O  
ATOM    502  CB  SER A  71      17.388  76.532  27.738  1.00 65.64           C  
ATOM    503  OG  SER A  71      17.110  77.288  26.563  1.00 68.66           O  
ATOM    504  N   THR A  72      15.414  73.890  27.029  1.00 60.35           N  
ATOM    505  CA  THR A  72      15.349  72.720  26.196  1.00 55.31           C  
ATOM    506  C   THR A  72      16.168  71.477  26.587  1.00 49.81           C  
ATOM    507  O   THR A  72      15.488  70.476  26.844  1.00 47.07           O  
ATOM    508  CB  THR A  72      15.618  73.350  24.690  1.00 57.25           C  
ATOM    509  OG1 THR A  72      15.422  72.273  23.772  1.00 55.39           O  
ATOM    510  CG2 THR A  72      17.003  74.012  24.449  1.00 55.21           C  
ATOM    511  N   HIS A  73      17.511  71.377  26.719  1.00 44.52           N  
ATOM    512  CA  HIS A  73      18.124  70.071  26.874  1.00 39.16           C  
ATOM    513  C   HIS A  73      19.279  69.790  27.782  1.00 35.80           C  
ATOM    514  O   HIS A  73      20.433  69.819  27.378  1.00 33.67           O  
ATOM    515  CB  HIS A  73      18.483  69.562  25.495  1.00 41.23           C  
ATOM    516  CG  HIS A  73      17.651  68.295  25.458  1.00 45.07           C  
ATOM    517  ND1 HIS A  73      16.322  68.197  25.615  1.00 44.73           N  
ATOM    518  CD2 HIS A  73      18.165  67.025  25.385  1.00 46.59           C  
ATOM    519  CE1 HIS A  73      16.009  66.926  25.658  1.00 46.15           C  
ATOM    520  NE2 HIS A  73      17.125  66.247  25.520  1.00 48.01           N  
ATOM    521  N   VAL A  74      18.849  69.290  28.951  1.00 34.01           N  
ATOM    522  CA  VAL A  74      19.764  69.137  30.077  1.00 33.36           C  
ATOM    523  C   VAL A  74      20.801  68.019  30.123  1.00 32.20           C  
ATOM    524  O   VAL A  74      21.986  68.361  30.220  1.00 35.39           O  
ATOM    525  CB  VAL A  74      18.980  69.044  31.424  1.00 33.30           C  
ATOM    526  CG1 VAL A  74      19.947  69.310  32.574  1.00 35.43           C  
ATOM    527  CG2 VAL A  74      17.973  70.162  31.593  1.00 35.86           C  
ATOM    528  N   LEU A  75      20.462  66.725  30.042  1.00 25.51           N  
ATOM    529  CA  LEU A  75      21.457  65.647  30.270  1.00 20.46           C  
ATOM    530  C   LEU A  75      22.214  65.694  31.623  1.00 15.34           C  
ATOM    531  O   LEU A  75      23.077  66.524  31.933  1.00 10.19           O  
ATOM    532  CB  LEU A  75      22.573  65.558  29.154  1.00 16.70           C  
ATOM    533  CG  LEU A  75      22.273  65.420  27.647  1.00 18.67           C  
ATOM    534  CD1 LEU A  75      20.975  64.642  27.389  1.00 15.84           C  
ATOM    535  CD2 LEU A  75      22.146  66.825  27.051  1.00 19.44           C  
ATOM    536  N   LEU A  76      21.730  64.788  32.468  1.00 11.41           N  
ATOM    537  CA  LEU A  76      22.352  64.467  33.744  1.00 10.70           C  
ATOM    538  C   LEU A  76      23.190  63.229  33.431  1.00 11.79           C  
ATOM    539  O   LEU A  76      22.774  62.354  32.667  1.00 14.65           O  
ATOM    540  CB  LEU A  76      21.311  64.121  34.836  1.00  6.18           C  
ATOM    541  CG  LEU A  76      20.247  65.061  35.525  1.00  4.20           C  
ATOM    542  CD1 LEU A  76      20.550  66.497  35.277  1.00  2.00           C  
ATOM    543  CD2 LEU A  76      18.863  64.834  34.987  1.00  2.00           C  
ATOM    544  N   THR A  77      24.412  63.118  33.920  1.00 13.76           N  
ATOM    545  CA  THR A  77      25.239  61.976  33.642  1.00 11.45           C  
ATOM    546  C   THR A  77      25.719  61.496  34.973  1.00 11.20           C  
ATOM    547  O   THR A  77      25.963  62.300  35.896  1.00 11.52           O  
ATOM    548  CB  THR A  77      26.496  62.309  32.753  1.00 13.94           C  
ATOM    549  OG1 THR A  77      27.451  63.169  33.411  1.00 11.65           O  
ATOM    550  CG2 THR A  77      25.972  62.904  31.454  1.00 12.98           C  
ATOM    551  N   HIS A  78      25.848  60.177  35.068  1.00 11.90           N  
ATOM    552  CA  HIS A  78      26.484  59.624  36.241  1.00 11.02           C  
ATOM    553  C   HIS A  78      27.573  58.591  35.942  1.00 12.93           C  
ATOM    554  O   HIS A  78      27.186  57.451  35.678  1.00 18.10           O  
ATOM    555  CB  HIS A  78      25.402  59.041  37.109  1.00  9.20           C  
ATOM    556  CG  HIS A  78      26.022  58.645  38.431  1.00 13.92           C  
ATOM    557  ND1 HIS A  78      25.722  57.562  39.138  1.00 15.11           N  
ATOM    558  CD2 HIS A  78      27.052  59.340  39.062  1.00 14.49           C  
ATOM    559  CE1 HIS A  78      26.538  57.592  40.172  1.00 19.21           C  
ATOM    560  NE2 HIS A  78      27.335  58.653  40.121  1.00 17.67           N  
ATOM    561  N   THR A  79      28.888  58.864  36.071  1.00 13.22           N  
ATOM    562  CA  THR A  79      29.915  57.936  35.603  1.00 11.06           C  
ATOM    563  C   THR A  79      30.829  57.479  36.718  1.00 14.04           C  
ATOM    564  O   THR A  79      31.297  58.373  37.419  1.00 17.80           O  
ATOM    565  CB  THR A  79      30.817  58.608  34.483  1.00 13.16           C  
ATOM    566  OG1 THR A  79      29.985  59.063  33.423  1.00 17.66           O  
ATOM    567  CG2 THR A  79      31.760  57.664  33.805  1.00  8.88           C  
ATOM    568  N   ILE A  80      31.074  56.170  36.945  1.00 14.02           N  
ATOM    569  CA  ILE A  80      32.130  55.708  37.849  1.00 11.76           C  
ATOM    570  C   ILE A  80      33.293  55.324  36.906  1.00 12.31           C  
ATOM    571  O   ILE A  80      33.093  54.584  35.939  1.00 16.09           O  
ATOM    572  CB  ILE A  80      31.694  54.468  38.709  1.00 12.43           C  
ATOM    573  CG1 ILE A  80      30.437  54.726  39.557  1.00 14.44           C  
ATOM    574  CG2 ILE A  80      32.842  54.188  39.682  1.00 12.53           C  
ATOM    575  CD1 ILE A  80      30.000  53.581  40.515  1.00 13.74           C  
ATOM    576  N   SER A  81      34.510  55.768  37.133  1.00 10.12           N  
ATOM    577  CA  SER A  81      35.691  55.615  36.282  1.00 11.10           C  
ATOM    578  C   SER A  81      36.817  55.005  37.119  1.00 14.45           C  
ATOM    579  O   SER A  81      36.818  55.064  38.369  1.00 16.93           O  
ATOM    580  CB  SER A  81      36.310  56.934  35.780  1.00 12.70           C  
ATOM    581  OG  SER A  81      35.591  57.972  35.094  1.00 17.58           O  
ATOM    582  N   ARG A  82      37.821  54.486  36.426  1.00  8.75           N  
ATOM    583  CA  ARG A  82      38.947  53.896  37.088  1.00  7.35           C  
ATOM    584  C   ARG A  82      40.208  54.528  36.604  1.00  8.89           C  
ATOM    585  O   ARG A  82      40.491  54.420  35.411  1.00 16.26           O  
ATOM    586  CB  ARG A  82      38.994  52.392  36.807  1.00 10.87           C  
ATOM    587  CG  ARG A  82      40.332  51.788  37.102  1.00  8.57           C  
ATOM    588  CD  ARG A  82      40.047  50.654  37.961  1.00 10.68           C  
ATOM    589  NE  ARG A  82      39.796  49.539  37.124  1.00 14.67           N  
ATOM    590  CZ  ARG A  82      40.735  48.624  36.866  1.00 17.91           C  
ATOM    591  NH1 ARG A  82      40.383  47.633  36.046  1.00 21.38           N  
ATOM    592  NH2 ARG A  82      41.956  48.625  37.412  1.00 14.93           N  
ATOM    593  N   ILE A  83      40.977  55.198  37.436  1.00  9.64           N  
ATOM    594  CA  ILE A  83      42.256  55.609  36.931  1.00 12.59           C  
ATOM    595  C   ILE A  83      43.244  54.603  37.558  1.00 15.71           C  
ATOM    596  O   ILE A  83      43.632  54.648  38.722  1.00 16.09           O  
ATOM    597  CB  ILE A  83      42.399  57.176  37.233  1.00 14.11           C  
ATOM    598  CG1 ILE A  83      43.912  57.439  37.177  1.00 16.58           C  
ATOM    599  CG2 ILE A  83      41.622  57.664  38.435  1.00 10.57           C  
ATOM    600  CD1 ILE A  83      44.432  58.707  36.422  1.00 15.05           C  
ATOM    601  N   ALA A  84      43.456  53.542  36.732  1.00 21.22           N  
ATOM    602  CA  ALA A  84      44.187  52.293  37.071  1.00 22.61           C  
ATOM    603  C   ALA A  84      45.715  52.271  37.182  1.00 22.03           C  
ATOM    604  O   ALA A  84      46.462  52.965  36.482  1.00 22.71           O  
ATOM    605  CB  ALA A  84      43.888  51.149  36.093  1.00 18.10           C  
ATOM    606  N   VAL A  85      46.218  51.398  38.035  1.00 20.35           N  
ATOM    607  CA  VAL A  85      47.641  51.376  38.255  1.00 16.08           C  
ATOM    608  C   VAL A  85      48.527  50.872  37.120  1.00 17.42           C  
ATOM    609  O   VAL A  85      49.741  50.907  37.261  1.00 22.66           O  
ATOM    610  CB  VAL A  85      47.807  50.617  39.514  1.00 12.69           C  
ATOM    611  CG1 VAL A  85      48.237  49.146  39.352  1.00 14.97           C  
ATOM    612  CG2 VAL A  85      48.660  51.574  40.271  1.00  8.74           C  
ATOM    613  N   SER A  86      48.012  50.414  35.988  1.00 16.93           N  
ATOM    614  CA  SER A  86      48.814  50.004  34.851  1.00 15.40           C  
ATOM    615  C   SER A  86      48.309  50.862  33.720  1.00 17.41           C  
ATOM    616  O   SER A  86      49.083  51.659  33.210  1.00 22.86           O  
ATOM    617  CB  SER A  86      48.579  48.538  34.624  1.00 14.37           C  
ATOM    618  OG  SER A  86      47.173  48.314  34.678  1.00 18.06           O  
ATOM    619  N   TYR A  87      47.043  50.832  33.292  1.00 17.82           N  
ATOM    620  CA  TYR A  87      46.585  51.775  32.272  1.00 19.08           C  
ATOM    621  C   TYR A  87      46.276  53.032  33.097  1.00 16.85           C  
ATOM    622  O   TYR A  87      45.147  53.352  33.463  1.00 17.82           O  
ATOM    623  CB  TYR A  87      45.275  51.340  31.433  1.00 23.98           C  
ATOM    624  CG  TYR A  87      44.368  50.096  31.709  1.00 31.39           C  
ATOM    625  CD1 TYR A  87      43.406  49.648  30.767  1.00 30.44           C  
ATOM    626  CD2 TYR A  87      44.515  49.352  32.876  1.00 32.60           C  
ATOM    627  CE1 TYR A  87      42.640  48.506  31.000  1.00 29.64           C  
ATOM    628  CE2 TYR A  87      43.767  48.225  33.106  1.00 32.41           C  
ATOM    629  CZ  TYR A  87      42.839  47.795  32.193  1.00 32.33           C  
ATOM    630  OH  TYR A  87      42.199  46.596  32.529  1.00 32.41           O  
ATOM    631  N   GLN A  88      47.312  53.782  33.458  1.00 16.07           N  
ATOM    632  CA  GLN A  88      47.144  54.955  34.310  1.00 16.48           C  
ATOM    633  C   GLN A  88      46.557  56.143  33.560  1.00 15.18           C  
ATOM    634  O   GLN A  88      47.226  56.968  32.908  1.00 10.42           O  
ATOM    635  CB  GLN A  88      48.492  55.275  34.896  1.00 16.75           C  
ATOM    636  CG  GLN A  88      48.250  55.897  36.256  1.00 18.22           C  
ATOM    637  CD  GLN A  88      49.451  56.619  36.864  1.00 16.91           C  
ATOM    638  OE1 GLN A  88      49.311  57.290  37.877  1.00 16.72           O  
ATOM    639  NE2 GLN A  88      50.649  56.575  36.316  1.00 15.19           N  
ATOM    640  N   THR A  89      45.241  56.084  33.631  1.00 14.13           N  
ATOM    641  CA  THR A  89      44.385  57.019  32.968  1.00 13.34           C  
ATOM    642  C   THR A  89      42.952  56.694  33.410  1.00 13.39           C  
ATOM    643  O   THR A  89      42.663  55.561  33.821  1.00 14.38           O  
ATOM    644  CB  THR A  89      44.571  56.844  31.448  1.00 12.80           C  
ATOM    645  OG1 THR A  89      43.986  58.010  30.907  1.00 17.79           O  
ATOM    646  CG2 THR A  89      43.935  55.611  30.816  1.00 10.33           C  
ATOM    647  N   LYS A  90      42.039  57.655  33.250  1.00 10.53           N  
ATOM    648  CA  LYS A  90      40.681  57.466  33.722  1.00 12.15           C  
ATOM    649  C   LYS A  90      39.834  56.597  32.784  1.00 10.37           C  
ATOM    650  O   LYS A  90      39.169  57.126  31.916  1.00  8.16           O  
ATOM    651  CB  LYS A  90      40.104  58.922  33.970  1.00 14.76           C  
ATOM    652  CG  LYS A  90      38.822  59.009  34.817  1.00 13.21           C  
ATOM    653  CD  LYS A  90      38.743  60.005  35.980  1.00 12.07           C  
ATOM    654  CE  LYS A  90      38.534  61.526  35.657  1.00 16.46           C  
ATOM    655  NZ  LYS A  90      37.219  61.933  35.158  1.00 16.67           N  
ATOM    656  N   VAL A  91      39.805  55.266  32.849  1.00  8.51           N  
ATOM    657  CA  VAL A  91      38.949  54.538  31.933  1.00  7.20           C  
ATOM    658  C   VAL A  91      37.549  54.537  32.503  1.00  9.58           C  
ATOM    659  O   VAL A  91      37.389  54.999  33.622  1.00 13.50           O  
ATOM    660  CB  VAL A  91      39.567  53.154  31.735  1.00  6.37           C  
ATOM    661  CG1 VAL A  91      38.815  52.178  30.884  1.00  3.12           C  
ATOM    662  CG2 VAL A  91      40.820  53.442  30.962  1.00  8.49           C  
ATOM    663  N   ASN A  92      36.498  54.016  31.897  1.00 11.71           N  
ATOM    664  CA  ASN A  92      35.137  54.312  32.331  1.00 12.59           C  
ATOM    665  C   ASN A  92      34.364  53.055  32.732  1.00 11.27           C  
ATOM    666  O   ASN A  92      34.160  52.142  31.953  1.00 11.82           O  
ATOM    667  CB  ASN A  92      34.561  55.080  31.132  1.00 14.02           C  
ATOM    668  CG  ASN A  92      33.358  55.953  31.374  1.00 13.85           C  
ATOM    669  OD1 ASN A  92      33.501  57.162  31.535  1.00 16.18           O  
ATOM    670  ND2 ASN A  92      32.127  55.448  31.430  1.00 16.40           N  
ATOM    671  N   LEU A  93      33.889  52.943  33.940  1.00 14.21           N  
ATOM    672  CA  LEU A  93      33.291  51.695  34.413  1.00 15.17           C  
ATOM    673  C   LEU A  93      31.784  51.445  34.360  1.00 12.41           C  
ATOM    674  O   LEU A  93      31.321  50.363  33.992  1.00 10.14           O  
ATOM    675  CB  LEU A  93      33.826  51.470  35.844  1.00 14.17           C  
ATOM    676  CG  LEU A  93      35.313  51.076  35.777  1.00 15.94           C  
ATOM    677  CD1 LEU A  93      35.915  50.851  37.138  1.00 12.80           C  
ATOM    678  CD2 LEU A  93      35.413  49.799  34.976  1.00  9.84           C  
ATOM    679  N   LEU A  94      31.006  52.455  34.726  1.00  8.92           N  
ATOM    680  CA  LEU A  94      29.572  52.385  34.714  1.00  8.28           C  
ATOM    681  C   LEU A  94      29.237  53.831  34.365  1.00 11.00           C  
ATOM    682  O   LEU A  94      30.020  54.755  34.668  1.00 14.39           O  
ATOM    683  CB  LEU A  94      29.104  51.916  36.115  1.00  5.85           C  
ATOM    684  CG  LEU A  94      29.555  50.543  36.690  1.00  5.32           C  
ATOM    685  CD1 LEU A  94      29.572  50.532  38.220  1.00  5.10           C  
ATOM    686  CD2 LEU A  94      28.658  49.489  36.199  1.00  2.67           C  
ATOM    687  N   SER A  95      28.118  54.072  33.703  1.00  9.28           N  
ATOM    688  CA  SER A  95      27.744  55.399  33.269  1.00  9.93           C  
ATOM    689  C   SER A  95      26.267  55.355  32.894  1.00  6.67           C  
ATOM    690  O   SER A  95      25.714  54.325  32.508  1.00  5.70           O  
ATOM    691  CB  SER A  95      28.603  55.794  32.069  1.00 10.67           C  
ATOM    692  OG  SER A  95      28.521  57.153  31.705  1.00 17.33           O  
ATOM    693  N   ALA A  96      25.565  56.457  33.080  1.00  7.57           N  
ATOM    694  CA  ALA A  96      24.163  56.506  32.664  1.00  9.68           C  
ATOM    695  C   ALA A  96      23.888  57.946  32.311  1.00  9.20           C  
ATOM    696  O   ALA A  96      24.537  58.849  32.879  1.00 13.95           O  
ATOM    697  CB  ALA A  96      23.229  56.092  33.794  1.00  7.16           C  
ATOM    698  N   ILE A  97      23.080  58.195  31.286  1.00 10.59           N  
ATOM    699  CA  ILE A  97      22.695  59.572  31.032  1.00 12.05           C  
ATOM    700  C   ILE A  97      21.183  59.568  31.243  1.00  9.44           C  
ATOM    701  O   ILE A  97      20.505  58.529  31.141  1.00  9.07           O  
ATOM    702  CB  ILE A  97      23.105  60.069  29.590  1.00 10.90           C  
ATOM    703  CG1 ILE A  97      24.481  59.560  29.145  1.00  8.16           C  
ATOM    704  CG2 ILE A  97      23.204  61.618  29.664  1.00  8.93           C  
ATOM    705  CD1 ILE A  97      25.180  60.368  28.048  1.00  8.02           C  
ATOM    706  N   LYS A  98      20.651  60.693  31.653  1.00  7.90           N  
ATOM    707  CA  LYS A  98      19.251  60.715  32.009  1.00 15.14           C  
ATOM    708  C   LYS A  98      18.671  62.009  31.484  1.00 16.36           C  
ATOM    709  O   LYS A  98      19.250  63.086  31.666  1.00 14.21           O  
ATOM    710  CB  LYS A  98      19.091  60.643  33.537  1.00 14.43           C  
ATOM    711  CG  LYS A  98      17.692  60.297  33.963  1.00 15.78           C  
ATOM    712  CD  LYS A  98      17.428  58.787  33.964  1.00 15.99           C  
ATOM    713  CE  LYS A  98      16.194  58.311  34.806  1.00 16.30           C  
ATOM    714  NZ  LYS A  98      16.314  58.354  36.264  1.00 11.50           N  
ATOM    715  N   SER A  99      17.557  61.932  30.769  1.00 20.87           N  
ATOM    716  CA  SER A  99      16.989  63.174  30.274  1.00 26.46           C  
ATOM    717  C   SER A  99      15.958  63.432  31.338  1.00 27.39           C  
ATOM    718  O   SER A  99      15.141  62.527  31.589  1.00 29.51           O  
ATOM    719  CB  SER A  99      16.275  63.065  28.892  1.00 29.18           C  
ATOM    720  OG  SER A  99      15.005  62.394  28.740  1.00 34.35           O  
ATOM    721  N   PRO A 100      16.001  64.593  32.001  1.00 24.85           N  
ATOM    722  CA  PRO A 100      14.959  64.992  32.938  1.00 26.16           C  
ATOM    723  C   PRO A 100      13.695  65.275  32.138  1.00 26.83           C  
ATOM    724  O   PRO A 100      13.125  64.362  31.543  1.00 30.31           O  
ATOM    725  CB  PRO A 100      15.569  66.178  33.654  1.00 22.56           C  
ATOM    726  CG  PRO A 100      16.450  66.774  32.600  1.00 22.91           C  
ATOM    727  CD  PRO A 100      17.047  65.584  31.872  1.00 23.37           C  
ATOM    728  N   CYS A 101      13.245  66.502  32.026  1.00 26.06           N  
ATOM    729  CA  CYS A 101      12.076  66.782  31.234  1.00 31.15           C  
ATOM    730  C   CYS A 101      12.346  66.843  29.726  1.00 30.89           C  
ATOM    731  O   CYS A 101      13.351  67.345  29.206  1.00 29.63           O  
ATOM    732  CB  CYS A 101      11.555  68.061  31.691  1.00 35.98           C  
ATOM    733  SG  CYS A 101      13.037  69.110  31.716  1.00 40.84           S  
ATOM    734  N   GLN A 102      11.407  66.268  29.018  1.00 31.44           N  
ATOM    735  CA  GLN A 102      11.365  66.265  27.581  1.00 36.75           C  
ATOM    736  C   GLN A 102      10.285  67.334  27.557  1.00 39.55           C  
ATOM    737  O   GLN A 102       9.124  66.999  27.787  1.00 39.22           O  
ATOM    738  CB  GLN A 102      10.891  64.881  27.173  1.00 37.59           C  
ATOM    739  CG  GLN A 102      10.423  64.548  25.756  1.00 41.52           C  
ATOM    740  CD  GLN A 102      11.501  64.103  24.772  1.00 43.97           C  
ATOM    741  OE1 GLN A 102      11.507  64.503  23.608  1.00 45.39           O  
ATOM    742  NE2 GLN A 102      12.479  63.288  25.156  1.00 47.11           N  
ATOM    743  N   ARG A 103      10.714  68.600  27.465  1.00 42.96           N  
ATOM    744  CA  ARG A 103       9.886  69.824  27.429  1.00 44.21           C  
ATOM    745  C   ARG A 103       8.947  70.132  28.602  1.00 45.47           C  
ATOM    746  O   ARG A 103       8.905  69.462  29.641  1.00 43.91           O  
ATOM    747  CB  ARG A 103       9.060  69.846  26.115  1.00 46.24           C  
ATOM    748  CG  ARG A 103       9.745  70.574  24.934  1.00 47.34           C  
ATOM    749  CD  ARG A 103       8.982  70.462  23.599  1.00 46.46           C  
ATOM    750  NE  ARG A 103       9.756  71.035  22.491  1.00 49.95           N  
ATOM    751  CZ  ARG A 103       9.599  70.739  21.176  1.00 48.95           C  
ATOM    752  NH1 ARG A 103      10.392  71.369  20.301  1.00 46.53           N  
ATOM    753  NH2 ARG A 103       8.702  69.846  20.710  1.00 47.01           N  
ATOM    754  N   GLU A 104       8.411  71.347  28.458  1.00 51.33           N  
ATOM    755  CA  GLU A 104       7.350  72.032  29.240  1.00 55.09           C  
ATOM    756  C   GLU A 104       7.869  73.467  29.225  1.00 55.42           C  
ATOM    757  O   GLU A 104       7.146  74.302  28.687  1.00 58.83           O  
ATOM    758  CB  GLU A 104       7.158  71.610  30.766  1.00 56.79           C  
ATOM    759  CG  GLU A 104       5.881  72.091  31.542  1.00 55.36           C  
ATOM    760  CD  GLU A 104       4.548  71.288  31.542  1.00 56.00           C  
ATOM    761  OE1 GLU A 104       3.475  71.883  31.711  1.00 53.86           O  
ATOM    762  OE2 GLU A 104       4.560  70.066  31.403  1.00 55.80           O  
ATOM    763  N   THR A 105       9.084  73.802  29.713  1.00 54.09           N  
ATOM    764  CA  THR A 105       9.663  75.155  29.611  1.00 54.66           C  
ATOM    765  C   THR A 105       8.826  76.341  30.167  1.00 56.92           C  
ATOM    766  O   THR A 105       8.664  77.426  29.586  1.00 56.87           O  
ATOM    767  CB  THR A 105      10.018  75.438  28.118  1.00 54.37           C  
ATOM    768  OG1 THR A 105      10.019  74.198  27.383  1.00 54.63           O  
ATOM    769  CG2 THR A 105      11.358  76.176  28.026  1.00 52.45           C  
ATOM    770  N   PRO A 106       8.260  76.207  31.363  1.00 57.72           N  
ATOM    771  CA  PRO A 106       6.844  75.860  31.572  1.00 59.10           C  
ATOM    772  C   PRO A 106       5.756  76.957  31.533  1.00 60.28           C  
ATOM    773  O   PRO A 106       4.550  76.675  31.474  1.00 58.11           O  
ATOM    774  CB  PRO A 106       6.920  75.120  32.887  1.00 58.40           C  
ATOM    775  CG  PRO A 106       8.407  74.870  33.118  1.00 57.92           C  
ATOM    776  CD  PRO A 106       9.016  76.150  32.595  1.00 56.56           C  
ATOM    777  N   GLU A 107       6.230  78.212  31.605  1.00 61.59           N  
ATOM    778  CA  GLU A 107       5.506  79.486  31.578  1.00 62.94           C  
ATOM    779  C   GLU A 107       4.003  79.669  31.860  1.00 62.77           C  
ATOM    780  O   GLU A 107       3.652  80.756  32.324  1.00 63.36           O  
ATOM    781  CB  GLU A 107       5.840  80.146  30.218  1.00 64.78           C  
ATOM    782  CG  GLU A 107       5.600  81.663  30.238  1.00 69.51           C  
ATOM    783  CD  GLU A 107       6.166  82.500  29.084  1.00 73.36           C  
ATOM    784  OE1 GLU A 107       7.185  82.130  28.481  1.00 76.19           O  
ATOM    785  OE2 GLU A 107       5.589  83.555  28.798  1.00 74.82           O  
ATOM    786  N   GLY A 108       3.043  78.774  31.596  1.00 62.68           N  
ATOM    787  CA  GLY A 108       1.646  78.976  32.005  1.00 61.43           C  
ATOM    788  C   GLY A 108       1.553  78.916  33.532  1.00 61.07           C  
ATOM    789  O   GLY A 108       0.889  79.724  34.186  1.00 59.42           O  
ATOM    790  N   ALA A 109       2.238  77.895  34.064  1.00 60.25           N  
ATOM    791  CA  ALA A 109       2.420  77.660  35.489  1.00 59.04           C  
ATOM    792  C   ALA A 109       3.810  77.049  35.445  1.00 57.41           C  
ATOM    793  O   ALA A 109       4.014  75.917  35.004  1.00 56.35           O  
ATOM    794  CB  ALA A 109       1.411  76.637  36.027  1.00 60.10           C  
ATOM    795  N   GLU A 110       4.785  77.858  35.830  1.00 57.09           N  
ATOM    796  CA  GLU A 110       6.197  77.478  35.662  1.00 57.21           C  
ATOM    797  C   GLU A 110       6.839  76.321  36.463  1.00 52.71           C  
ATOM    798  O   GLU A 110       6.828  75.169  36.037  1.00 49.55           O  
ATOM    799  CB  GLU A 110       7.013  78.798  35.838  1.00 58.92           C  
ATOM    800  CG  GLU A 110       8.555  78.878  35.815  1.00 60.51           C  
ATOM    801  CD  GLU A 110       9.080  80.059  36.679  1.00 62.01           C  
ATOM    802  OE1 GLU A 110       8.730  81.223  36.414  1.00 64.02           O  
ATOM    803  OE2 GLU A 110       9.823  79.819  37.638  1.00 60.40           O  
ATOM    804  N   ALA A 111       7.370  76.521  37.661  1.00 49.80           N  
ATOM    805  CA  ALA A 111       8.248  75.508  38.196  1.00 47.29           C  
ATOM    806  C   ALA A 111       7.611  74.412  39.040  1.00 45.18           C  
ATOM    807  O   ALA A 111       7.563  74.462  40.268  1.00 43.21           O  
ATOM    808  CB  ALA A 111       9.352  76.237  38.968  1.00 45.91           C  
ATOM    809  N   LYS A 112       7.025  73.412  38.374  1.00 43.06           N  
ATOM    810  CA  LYS A 112       6.628  72.220  39.093  1.00 38.58           C  
ATOM    811  C   LYS A 112       7.869  71.301  39.182  1.00 36.20           C  
ATOM    812  O   LYS A 112       8.749  71.304  38.302  1.00 34.87           O  
ATOM    813  CB  LYS A 112       5.450  71.552  38.365  1.00 37.95           C  
ATOM    814  CG  LYS A 112       5.586  71.207  36.903  1.00 37.98           C  
ATOM    815  CD  LYS A 112       4.372  70.386  36.507  1.00 37.87           C  
ATOM    816  CE  LYS A 112       4.646  68.967  36.958  1.00 38.91           C  
ATOM    817  NZ  LYS A 112       3.422  68.190  36.993  1.00 41.30           N  
ATOM    818  N   PRO A 113       8.051  70.539  40.267  1.00 34.16           N  
ATOM    819  CA  PRO A 113       9.349  69.936  40.605  1.00 30.49           C  
ATOM    820  C   PRO A 113       9.634  68.662  39.811  1.00 28.35           C  
ATOM    821  O   PRO A 113       8.651  67.987  39.451  1.00 31.95           O  
ATOM    822  CB  PRO A 113       9.211  69.744  42.108  1.00 30.36           C  
ATOM    823  CG  PRO A 113       7.733  69.419  42.352  1.00 28.41           C  
ATOM    824  CD  PRO A 113       7.006  70.186  41.250  1.00 31.07           C  
ATOM    825  N   TRP A 114      10.859  68.285  39.470  1.00 23.60           N  
ATOM    826  CA  TRP A 114      11.119  66.989  38.871  1.00 21.42           C  
ATOM    827  C   TRP A 114      12.229  66.352  39.725  1.00 21.49           C  
ATOM    828  O   TRP A 114      13.029  67.066  40.345  1.00 21.11           O  
ATOM    829  CB  TRP A 114      11.546  67.110  37.337  1.00 15.32           C  
ATOM    830  CG  TRP A 114      12.687  68.007  36.858  1.00 13.31           C  
ATOM    831  CD1 TRP A 114      12.405  69.226  36.285  1.00 13.16           C  
ATOM    832  CD2 TRP A 114      14.041  67.787  36.993  1.00 11.07           C  
ATOM    833  NE1 TRP A 114      13.571  69.781  36.082  1.00 13.41           N  
ATOM    834  CE2 TRP A 114      14.562  68.953  36.490  1.00 11.66           C  
ATOM    835  CE3 TRP A 114      14.883  66.803  37.455  1.00 11.15           C  
ATOM    836  CZ2 TRP A 114      15.925  69.134  36.456  1.00 11.02           C  
ATOM    837  CZ3 TRP A 114      16.235  66.975  37.424  1.00 10.51           C  
ATOM    838  CH2 TRP A 114      16.748  68.140  36.928  1.00 10.82           C  
ATOM    839  N   TYR A 115      12.282  65.015  39.781  1.00 22.80           N  
ATOM    840  CA  TYR A 115      13.290  64.287  40.554  1.00 24.49           C  
ATOM    841  C   TYR A 115      13.780  63.141  39.700  1.00 22.82           C  
ATOM    842  O   TYR A 115      12.907  62.341  39.362  1.00 27.52           O  
ATOM    843  CB  TYR A 115      12.727  63.662  41.855  1.00 23.34           C  
ATOM    844  CG  TYR A 115      12.141  64.653  42.858  1.00 22.67           C  
ATOM    845  CD1 TYR A 115      10.774  64.866  42.959  1.00 22.76           C  
ATOM    846  CD2 TYR A 115      13.011  65.358  43.664  1.00 23.18           C  
ATOM    847  CE1 TYR A 115      10.307  65.795  43.877  1.00 24.97           C  
ATOM    848  CE2 TYR A 115      12.559  66.282  44.579  1.00 24.01           C  
ATOM    849  CZ  TYR A 115      11.208  66.491  44.677  1.00 24.51           C  
ATOM    850  OH  TYR A 115      10.775  67.422  45.589  1.00 24.94           O  
ATOM    851  N   GLU A 116      15.044  63.034  39.282  1.00 20.42           N  
ATOM    852  CA  GLU A 116      15.521  61.857  38.567  1.00 21.75           C  
ATOM    853  C   GLU A 116      16.547  61.012  39.352  1.00 19.28           C  
ATOM    854  O   GLU A 116      17.627  61.518  39.703  1.00 20.69           O  
ATOM    855  CB  GLU A 116      16.151  62.263  37.223  1.00 23.00           C  
ATOM    856  CG  GLU A 116      15.181  62.580  36.075  1.00 26.77           C  
ATOM    857  CD  GLU A 116      14.386  61.394  35.504  1.00 28.08           C  
ATOM    858  OE1 GLU A 116      14.451  61.181  34.296  1.00 30.21           O  
ATOM    859  OE2 GLU A 116      13.692  60.673  36.239  1.00 31.21           O  
ATOM    860  N   PRO A 117      16.309  59.740  39.690  1.00 14.13           N  
ATOM    861  CA  PRO A 117      17.297  58.907  40.331  1.00 15.24           C  
ATOM    862  C   PRO A 117      18.228  58.102  39.414  1.00 17.23           C  
ATOM    863  O   PRO A 117      17.790  57.271  38.617  1.00 21.00           O  
ATOM    864  CB  PRO A 117      16.439  58.085  41.261  1.00 10.34           C  
ATOM    865  CG  PRO A 117      15.247  57.797  40.426  1.00  7.83           C  
ATOM    866  CD  PRO A 117      15.003  59.123  39.770  1.00 12.93           C  
ATOM    867  N   ILE A 118      19.528  58.275  39.450  1.00 16.25           N  
ATOM    868  CA  ILE A 118      20.354  57.368  38.685  1.00 15.30           C  
ATOM    869  C   ILE A 118      21.029  56.427  39.681  1.00 15.70           C  
ATOM    870  O   ILE A 118      21.568  56.900  40.695  1.00 15.77           O  
ATOM    871  CB  ILE A 118      21.407  58.143  37.861  1.00 13.86           C  
ATOM    872  CG1 ILE A 118      20.768  59.067  36.862  1.00 11.79           C  
ATOM    873  CG2 ILE A 118      22.258  57.131  37.134  1.00 13.43           C  
ATOM    874  CD1 ILE A 118      21.820  59.662  35.931  1.00 12.60           C  
ATOM    875  N   TYR A 119      21.009  55.121  39.418  1.00 13.79           N  
ATOM    876  CA  TYR A 119      21.733  54.177  40.233  1.00 17.73           C  
ATOM    877  C   TYR A 119      22.700  53.395  39.316  1.00 20.17           C  
ATOM    878  O   TYR A 119      22.388  53.188  38.143  1.00 24.02           O  
ATOM    879  CB  TYR A 119      20.717  53.287  40.917  1.00 18.24           C  
ATOM    880  CG  TYR A 119      21.415  52.175  41.688  1.00 23.93           C  
ATOM    881  CD1 TYR A 119      22.150  52.501  42.804  1.00 26.68           C  
ATOM    882  CD2 TYR A 119      21.324  50.847  41.309  1.00 25.28           C  
ATOM    883  CE1 TYR A 119      22.797  51.540  43.556  1.00 28.05           C  
ATOM    884  CE2 TYR A 119      21.974  49.882  42.056  1.00 27.67           C  
ATOM    885  CZ  TYR A 119      22.699  50.232  43.184  1.00 26.81           C  
ATOM    886  OH  TYR A 119      23.300  49.280  43.980  1.00 26.19           O  
ATOM    887  N   LEU A 120      23.869  52.913  39.751  1.00 20.10           N  
ATOM    888  CA  LEU A 120      24.890  52.246  38.922  1.00 20.06           C  
ATOM    889  C   LEU A 120      25.547  51.126  39.722  1.00 18.29           C  
ATOM    890  O   LEU A 120      25.580  51.271  40.952  1.00 18.05           O  
ATOM    891  CB  LEU A 120      26.007  53.227  38.536  1.00 20.66           C  
ATOM    892  CG  LEU A 120      26.129  53.719  37.094  1.00 25.32           C  
ATOM    893  CD1 LEU A 120      24.809  54.216  36.524  1.00 24.79           C  
ATOM    894  CD2 LEU A 120      27.149  54.836  37.097  1.00 22.56           C  
ATOM    895  N   GLY A 121      26.115  50.048  39.171  1.00 16.75           N  
ATOM    896  CA  GLY A 121      26.787  49.081  40.031  1.00 16.28           C  
ATOM    897  C   GLY A 121      27.153  47.761  39.357  1.00 16.54           C  
ATOM    898  O   GLY A 121      26.300  47.204  38.641  1.00 11.95           O  
ATOM    899  N   GLY A 122      28.379  47.237  39.555  1.00 14.48           N  
ATOM    900  CA  GLY A 122      28.760  45.996  38.889  1.00 14.42           C  
ATOM    901  C   GLY A 122      30.037  45.353  39.402  1.00 14.67           C  
ATOM    902  O   GLY A 122      30.776  46.018  40.132  1.00 18.80           O  
ATOM    903  N   VAL A 123      30.330  44.096  39.075  1.00  9.04           N  
ATOM    904  CA  VAL A 123      31.518  43.483  39.615  1.00  8.88           C  
ATOM    905  C   VAL A 123      32.697  43.626  38.663  1.00  8.70           C  
ATOM    906  O   VAL A 123      32.649  43.320  37.468  1.00 13.23           O  
ATOM    907  CB  VAL A 123      31.287  41.954  39.952  1.00  8.62           C  
ATOM    908  CG1 VAL A 123      32.446  41.463  40.819  1.00  7.25           C  
ATOM    909  CG2 VAL A 123      30.010  41.736  40.745  1.00  7.09           C  
ATOM    910  N   PHE A 124      33.776  44.115  39.226  1.00  7.91           N  
ATOM    911  CA  PHE A 124      35.026  44.331  38.530  1.00  9.72           C  
ATOM    912  C   PHE A 124      36.197  43.730  39.317  1.00 12.08           C  
ATOM    913  O   PHE A 124      36.131  43.511  40.524  1.00 17.61           O  
ATOM    914  CB  PHE A 124      35.229  45.857  38.317  1.00 11.49           C  
ATOM    915  CG  PHE A 124      34.166  46.515  37.453  1.00 10.81           C  
ATOM    916  CD1 PHE A 124      33.072  47.089  38.058  1.00 10.87           C  
ATOM    917  CD2 PHE A 124      34.265  46.449  36.076  1.00 12.17           C  
ATOM    918  CE1 PHE A 124      32.052  47.585  37.283  1.00 10.59           C  
ATOM    919  CE2 PHE A 124      33.241  46.959  35.302  1.00 13.50           C  
ATOM    920  CZ  PHE A 124      32.130  47.517  35.916  1.00 14.67           C  
ATOM    921  N   GLN A 125      37.322  43.417  38.694  1.00 17.02           N  
ATOM    922  CA  GLN A 125      38.492  42.844  39.348  1.00 15.27           C  
ATOM    923  C   GLN A 125      39.455  44.000  39.510  1.00 14.64           C  
ATOM    924  O   GLN A 125      40.181  44.286  38.560  1.00 15.96           O  
ATOM    925  CB  GLN A 125      39.073  41.784  38.460  1.00 14.55           C  
ATOM    926  CG  GLN A 125      40.423  41.309  38.900  1.00 24.75           C  
ATOM    927  CD  GLN A 125      41.525  41.371  37.831  1.00 29.04           C  
ATOM    928  OE1 GLN A 125      41.457  40.696  36.801  1.00 33.17           O  
ATOM    929  NE2 GLN A 125      42.613  42.129  37.981  1.00 32.30           N  
ATOM    930  N   LEU A 126      39.504  44.699  40.639  1.00 12.53           N  
ATOM    931  CA  LEU A 126      40.454  45.809  40.754  1.00 13.41           C  
ATOM    932  C   LEU A 126      41.854  45.361  41.193  1.00 12.86           C  
ATOM    933  O   LEU A 126      42.072  44.159  41.339  1.00 12.02           O  
ATOM    934  CB  LEU A 126      39.867  46.851  41.728  1.00 13.01           C  
ATOM    935  CG  LEU A 126      38.594  47.438  41.172  1.00 12.11           C  
ATOM    936  CD1 LEU A 126      37.694  48.056  42.194  1.00 10.20           C  
ATOM    937  CD2 LEU A 126      39.040  48.435  40.149  1.00 12.93           C  
ATOM    938  N   GLU A 127      42.850  46.248  41.317  1.00 12.50           N  
ATOM    939  CA  GLU A 127      44.176  45.889  41.824  1.00 15.87           C  
ATOM    940  C   GLU A 127      44.571  46.826  42.937  1.00 15.74           C  
ATOM    941  O   GLU A 127      43.913  47.839  43.145  1.00 20.11           O  
ATOM    942  CB  GLU A 127      45.304  46.037  40.859  1.00 16.83           C  
ATOM    943  CG  GLU A 127      45.068  45.513  39.469  1.00 23.89           C  
ATOM    944  CD  GLU A 127      46.379  45.133  38.804  1.00 25.87           C  
ATOM    945  OE1 GLU A 127      46.484  43.979  38.342  1.00 24.89           O  
ATOM    946  OE2 GLU A 127      47.275  45.993  38.803  1.00 26.86           O  
ATOM    947  N   LYS A 128      45.651  46.587  43.661  1.00 19.60           N  
ATOM    948  CA  LYS A 128      46.075  47.588  44.633  1.00 23.52           C  
ATOM    949  C   LYS A 128      46.608  48.901  44.016  1.00 19.52           C  
ATOM    950  O   LYS A 128      47.372  48.921  43.053  1.00 20.74           O  
ATOM    951  CB  LYS A 128      47.151  46.987  45.580  1.00 25.61           C  
ATOM    952  CG  LYS A 128      47.897  47.933  46.564  1.00 27.67           C  
ATOM    953  CD  LYS A 128      48.722  46.937  47.307  1.00 29.65           C  
ATOM    954  CE  LYS A 128      49.949  47.520  47.934  1.00 32.85           C  
ATOM    955  NZ  LYS A 128      50.682  46.398  48.495  1.00 37.61           N  
ATOM    956  N   GLY A 129      46.166  50.007  44.594  1.00 15.77           N  
ATOM    957  CA  GLY A 129      46.663  51.287  44.254  1.00 14.86           C  
ATOM    958  C   GLY A 129      45.793  51.954  43.230  1.00 18.48           C  
ATOM    959  O   GLY A 129      45.953  53.170  43.167  1.00 23.77           O  
ATOM    960  N   ASP A 130      44.864  51.362  42.447  1.00 17.80           N  
ATOM    961  CA  ASP A 130      44.151  52.182  41.445  1.00 19.28           C  
ATOM    962  C   ASP A 130      42.972  52.952  41.977  1.00 15.81           C  
ATOM    963  O   ASP A 130      42.228  52.374  42.762  1.00 16.36           O  
ATOM    964  CB  ASP A 130      43.640  51.348  40.235  1.00 21.90           C  
ATOM    965  CG  ASP A 130      42.742  50.142  40.474  1.00 24.53           C  
ATOM    966  OD1 ASP A 130      41.668  50.293  41.070  1.00 26.68           O  
ATOM    967  OD2 ASP A 130      43.117  49.053  40.036  1.00 22.48           O  
ATOM    968  N   ARG A 131      42.808  54.231  41.611  1.00 15.36           N  
ATOM    969  CA  ARG A 131      41.683  54.991  42.139  1.00 17.51           C  
ATOM    970  C   ARG A 131      40.345  54.652  41.481  1.00 17.01           C  
ATOM    971  O   ARG A 131      40.310  54.116  40.365  1.00 18.43           O  
ATOM    972  CB  ARG A 131      41.823  56.477  41.953  1.00 19.98           C  
ATOM    973  CG  ARG A 131      43.148  57.240  41.890  1.00 26.05           C  
ATOM    974  CD  ARG A 131      43.819  57.619  43.205  1.00 30.35           C  
ATOM    975  NE  ARG A 131      44.944  56.739  43.524  1.00 34.05           N  
ATOM    976  CZ  ARG A 131      46.059  57.226  44.095  1.00 35.61           C  
ATOM    977  NH1 ARG A 131      47.070  56.393  44.360  1.00 35.40           N  
ATOM    978  NH2 ARG A 131      46.174  58.528  44.404  1.00 35.57           N  
ATOM    979  N   LEU A 132      39.214  54.891  42.163  1.00 18.05           N  
ATOM    980  CA  LEU A 132      37.848  54.829  41.551  1.00 14.56           C  
ATOM    981  C   LEU A 132      37.199  56.204  41.675  1.00 12.22           C  
ATOM    982  O   LEU A 132      37.242  56.731  42.796  1.00 17.69           O  
ATOM    983  CB  LEU A 132      36.924  53.839  42.244  1.00  9.12           C  
ATOM    984  CG  LEU A 132      37.021  52.382  41.936  1.00  9.05           C  
ATOM    985  CD1 LEU A 132      36.510  52.140  40.541  1.00  7.53           C  
ATOM    986  CD2 LEU A 132      38.442  51.907  42.043  1.00  8.67           C  
ATOM    987  N   SER A 133      36.655  56.870  40.657  1.00 11.50           N  
ATOM    988  CA  SER A 133      36.025  58.206  40.867  1.00 14.26           C  
ATOM    989  C   SER A 133      34.503  58.162  40.699  1.00 14.50           C  
ATOM    990  O   SER A 133      34.067  57.285  39.955  1.00 22.58           O  
ATOM    991  CB  SER A 133      36.541  59.254  39.872  1.00  8.86           C  
ATOM    992  OG  SER A 133      37.933  59.308  40.078  1.00 15.39           O  
ATOM    993  N   ALA A 134      33.594  58.928  41.298  1.00 13.08           N  
ATOM    994  CA  ALA A 134      32.216  58.834  40.858  1.00 11.26           C  
ATOM    995  C   ALA A 134      31.547  60.173  40.533  1.00 14.59           C  
ATOM    996  O   ALA A 134      30.726  60.642  41.325  1.00 15.61           O  
ATOM    997  CB  ALA A 134      31.478  58.108  41.944  1.00 15.70           C  
ATOM    998  N   GLU A 135      31.818  60.881  39.428  1.00 17.69           N  
ATOM    999  CA  GLU A 135      31.164  62.206  39.263  1.00 20.57           C  
ATOM   1000  C   GLU A 135      29.869  62.270  38.486  1.00 20.00           C  
ATOM   1001  O   GLU A 135      29.505  61.378  37.712  1.00 21.48           O  
ATOM   1002  CB  GLU A 135      31.974  63.287  38.554  1.00 19.66           C  
ATOM   1003  CG  GLU A 135      33.470  63.323  38.762  1.00 20.19           C  
ATOM   1004  CD  GLU A 135      34.247  62.454  37.779  1.00 20.51           C  
ATOM   1005  OE1 GLU A 135      35.369  62.853  37.458  1.00 20.42           O  
ATOM   1006  OE2 GLU A 135      33.745  61.406  37.348  1.00 21.14           O  
ATOM   1007  N   ILE A 136      29.147  63.333  38.832  1.00 22.36           N  
ATOM   1008  CA  ILE A 136      27.991  63.774  38.030  1.00 22.29           C  
ATOM   1009  C   ILE A 136      28.323  65.106  37.309  1.00 21.10           C  
ATOM   1010  O   ILE A 136      29.083  65.951  37.799  1.00 23.28           O  
ATOM   1011  CB  ILE A 136      26.717  64.017  38.857  1.00 19.88           C  
ATOM   1012  CG1 ILE A 136      27.030  64.914  39.998  1.00 17.75           C  
ATOM   1013  CG2 ILE A 136      26.135  62.692  39.335  1.00 22.68           C  
ATOM   1014  CD1 ILE A 136      25.880  65.824  40.046  1.00 17.31           C  
ATOM   1015  N   ASN A 137      27.770  65.331  36.124  1.00 19.00           N  
ATOM   1016  CA  ASN A 137      28.017  66.526  35.347  1.00 16.85           C  
ATOM   1017  C   ASN A 137      27.195  67.680  35.798  1.00 17.73           C  
ATOM   1018  O   ASN A 137      27.513  68.818  35.432  1.00 23.77           O  
ATOM   1019  CB  ASN A 137      27.693  66.330  33.902  1.00 18.18           C  
ATOM   1020  CG  ASN A 137      26.226  66.059  33.678  1.00 21.36           C  
ATOM   1021  OD1 ASN A 137      25.482  65.578  34.546  1.00 23.04           O  
ATOM   1022  ND2 ASN A 137      25.806  66.383  32.481  1.00 23.85           N  
ATOM   1023  N   ARG A 138      26.091  67.468  36.500  1.00 16.82           N  
ATOM   1024  CA  ARG A 138      25.449  68.648  36.995  1.00 20.19           C  
ATOM   1025  C   ARG A 138      25.211  68.719  38.497  1.00 20.23           C  
ATOM   1026  O   ARG A 138      24.031  68.685  38.866  1.00 21.54           O  
ATOM   1027  CB  ARG A 138      24.171  68.807  36.170  1.00 24.11           C  
ATOM   1028  CG  ARG A 138      24.365  69.927  35.111  1.00 26.83           C  
ATOM   1029  CD  ARG A 138      23.236  69.790  34.134  1.00 29.88           C  
ATOM   1030  NE  ARG A 138      22.990  70.985  33.371  1.00 32.53           N  
ATOM   1031  CZ  ARG A 138      22.300  72.074  33.786  1.00 34.73           C  
ATOM   1032  NH1 ARG A 138      22.148  73.035  32.886  1.00 39.13           N  
ATOM   1033  NH2 ARG A 138      21.839  72.348  35.009  1.00 29.42           N  
ATOM   1034  N   PRO A 139      26.208  68.867  39.421  1.00 16.38           N  
ATOM   1035  CA  PRO A 139      26.003  69.105  40.838  1.00 16.52           C  
ATOM   1036  C   PRO A 139      24.907  70.085  41.180  1.00 18.25           C  
ATOM   1037  O   PRO A 139      24.257  69.809  42.170  1.00 23.18           O  
ATOM   1038  CB  PRO A 139      27.336  69.529  41.381  1.00 13.08           C  
ATOM   1039  CG  PRO A 139      28.059  69.971  40.177  1.00 13.26           C  
ATOM   1040  CD  PRO A 139      27.641  68.881  39.193  1.00 16.95           C  
ATOM   1041  N   ASP A 140      24.603  71.158  40.452  1.00 15.99           N  
ATOM   1042  CA  ASP A 140      23.463  72.009  40.784  1.00 17.91           C  
ATOM   1043  C   ASP A 140      22.131  71.271  40.879  1.00 18.35           C  
ATOM   1044  O   ASP A 140      21.226  71.653  41.603  1.00 19.50           O  
ATOM   1045  CB  ASP A 140      23.305  73.172  39.764  1.00 18.82           C  
ATOM   1046  CG  ASP A 140      23.789  73.058  38.313  1.00 19.55           C  
ATOM   1047  OD1 ASP A 140      24.360  72.047  37.915  1.00 21.36           O  
ATOM   1048  OD2 ASP A 140      23.622  74.019  37.565  1.00 19.61           O  
ATOM   1049  N   TYR A 141      22.002  70.161  40.185  1.00 19.46           N  
ATOM   1050  CA  TYR A 141      20.809  69.354  40.244  1.00 18.71           C  
ATOM   1051  C   TYR A 141      20.829  68.317  41.348  1.00 20.77           C  
ATOM   1052  O   TYR A 141      20.008  67.397  41.326  1.00 24.89           O  
ATOM   1053  CB  TYR A 141      20.610  68.668  38.904  1.00 19.19           C  
ATOM   1054  CG  TYR A 141      20.075  69.610  37.846  1.00 20.26           C  
ATOM   1055  CD1 TYR A 141      20.554  69.567  36.571  1.00 17.69           C  
ATOM   1056  CD2 TYR A 141      19.073  70.509  38.182  1.00 22.33           C  
ATOM   1057  CE1 TYR A 141      20.007  70.409  35.648  1.00 20.74           C  
ATOM   1058  CE2 TYR A 141      18.531  71.366  37.261  1.00 20.87           C  
ATOM   1059  CZ  TYR A 141      19.023  71.308  35.996  1.00 21.27           C  
ATOM   1060  OH  TYR A 141      18.561  72.234  35.094  1.00 25.96           O  
ATOM   1061  N   LEU A 142      21.720  68.397  42.334  1.00 18.00           N  
ATOM   1062  CA  LEU A 142      21.739  67.398  43.383  1.00 17.94           C  
ATOM   1063  C   LEU A 142      20.754  67.701  44.492  1.00 20.36           C  
ATOM   1064  O   LEU A 142      20.543  68.852  44.917  1.00 25.79           O  
ATOM   1065  CB  LEU A 142      23.114  67.273  44.005  1.00 14.15           C  
ATOM   1066  CG  LEU A 142      24.125  66.536  43.175  1.00 14.41           C  
ATOM   1067  CD1 LEU A 142      25.489  66.551  43.846  1.00 15.65           C  
ATOM   1068  CD2 LEU A 142      23.651  65.113  43.015  1.00 10.55           C  
ATOM   1069  N   LEU A 143      20.135  66.641  44.992  1.00 20.58           N  
ATOM   1070  CA  LEU A 143      19.182  66.766  46.084  1.00 19.37           C  
ATOM   1071  C   LEU A 143      19.914  66.772  47.402  1.00 19.57           C  
ATOM   1072  O   LEU A 143      20.794  65.948  47.552  1.00 19.79           O  
ATOM   1073  CB  LEU A 143      18.246  65.602  46.052  1.00 17.74           C  
ATOM   1074  CG  LEU A 143      16.871  65.679  46.616  1.00 18.29           C  
ATOM   1075  CD1 LEU A 143      16.301  67.072  46.535  1.00 19.77           C  
ATOM   1076  CD2 LEU A 143      15.988  64.802  45.739  1.00 24.78           C  
ATOM   1077  N   PHE A 144      19.653  67.629  48.388  1.00 21.14           N  
ATOM   1078  CA  PHE A 144      20.282  67.499  49.707  1.00 21.29           C  
ATOM   1079  C   PHE A 144      19.276  67.780  50.810  1.00 24.30           C  
ATOM   1080  O   PHE A 144      19.340  68.734  51.593  1.00 23.96           O  
ATOM   1081  CB  PHE A 144      21.489  68.452  49.880  1.00 19.81           C  
ATOM   1082  CG  PHE A 144      22.703  67.977  49.109  1.00 15.15           C  
ATOM   1083  CD1 PHE A 144      23.151  66.691  49.282  1.00 13.61           C  
ATOM   1084  CD2 PHE A 144      23.344  68.828  48.225  1.00 12.92           C  
ATOM   1085  CE1 PHE A 144      24.244  66.264  48.556  1.00 15.19           C  
ATOM   1086  CE2 PHE A 144      24.441  68.377  47.515  1.00 11.48           C  
ATOM   1087  CZ  PHE A 144      24.890  67.097  47.678  1.00 10.62           C  
ATOM   1088  N   ALA A 145      18.310  66.864  50.756  1.00 25.02           N  
ATOM   1089  CA  ALA A 145      17.234  66.827  51.709  1.00 31.22           C  
ATOM   1090  C   ALA A 145      16.974  65.382  52.114  1.00 37.68           C  
ATOM   1091  O   ALA A 145      16.047  65.062  52.872  1.00 42.45           O  
ATOM   1092  CB  ALA A 145      15.971  67.385  51.098  1.00 28.91           C  
ATOM   1093  N   GLU A 146      17.775  64.422  51.670  1.00 41.42           N  
ATOM   1094  CA  GLU A 146      17.488  63.020  51.969  1.00 43.26           C  
ATOM   1095  C   GLU A 146      18.831  62.395  52.142  1.00 44.09           C  
ATOM   1096  O   GLU A 146      19.573  62.715  51.217  1.00 44.56           O  
ATOM   1097  CB  GLU A 146      16.801  62.351  50.812  1.00 41.97           C  
ATOM   1098  CG  GLU A 146      15.377  62.787  50.719  1.00 41.76           C  
ATOM   1099  CD  GLU A 146      15.068  63.052  49.280  1.00 44.55           C  
ATOM   1100  OE1 GLU A 146      15.207  62.147  48.442  1.00 45.80           O  
ATOM   1101  OE2 GLU A 146      14.705  64.183  48.995  1.00 46.33           O  
ATOM   1102  N   SER A 147      19.284  61.601  53.135  1.00 43.94           N  
ATOM   1103  CA  SER A 147      20.678  61.201  52.968  1.00 46.06           C  
ATOM   1104  C   SER A 147      20.872  59.886  52.260  1.00 46.71           C  
ATOM   1105  O   SER A 147      21.855  59.630  51.526  1.00 47.61           O  
ATOM   1106  CB  SER A 147      21.368  61.146  54.270  1.00 47.70           C  
ATOM   1107  OG  SER A 147      22.743  61.186  53.922  1.00 50.04           O  
ATOM   1108  N   GLY A 148      19.761  59.146  52.355  1.00 47.24           N  
ATOM   1109  CA  GLY A 148      19.657  57.832  51.716  1.00 42.04           C  
ATOM   1110  C   GLY A 148      19.252  57.942  50.269  1.00 33.74           C  
ATOM   1111  O   GLY A 148      18.214  57.400  49.875  1.00 28.13           O  
ATOM   1112  N   GLN A 149      20.198  58.647  49.621  1.00 30.48           N  
ATOM   1113  CA  GLN A 149      20.099  59.115  48.269  1.00 28.85           C  
ATOM   1114  C   GLN A 149      21.385  59.035  47.459  1.00 24.96           C  
ATOM   1115  O   GLN A 149      21.470  58.113  46.640  1.00 20.92           O  
ATOM   1116  CB  GLN A 149      19.579  60.568  48.263  1.00 32.01           C  
ATOM   1117  CG  GLN A 149      20.437  61.746  48.679  1.00 34.39           C  
ATOM   1118  CD  GLN A 149      20.090  63.086  48.022  1.00 36.16           C  
ATOM   1119  OE1 GLN A 149      20.439  63.393  46.869  1.00 38.04           O  
ATOM   1120  NE2 GLN A 149      19.345  63.925  48.733  1.00 37.26           N  
ATOM   1121  N   VAL A 150      22.400  59.905  47.692  1.00 23.03           N  
ATOM   1122  CA  VAL A 150      23.624  59.931  46.903  1.00 20.37           C  
ATOM   1123  C   VAL A 150      24.874  59.489  47.651  1.00 17.18           C  
ATOM   1124  O   VAL A 150      25.280  60.071  48.636  1.00 21.55           O  
ATOM   1125  CB  VAL A 150      23.760  61.353  46.273  1.00 18.90           C  
ATOM   1126  CG1 VAL A 150      23.530  62.448  47.245  1.00 18.26           C  
ATOM   1127  CG2 VAL A 150      25.150  61.450  45.658  1.00 19.12           C  
ATOM   1128  N   TYR A 151      25.503  58.439  47.149  1.00 18.50           N  
ATOM   1129  CA  TYR A 151      26.606  57.705  47.775  1.00 16.70           C  
ATOM   1130  C   TYR A 151      27.420  56.945  46.720  1.00 12.79           C  
ATOM   1131  O   TYR A 151      27.064  56.951  45.533  1.00 17.10           O  
ATOM   1132  CB  TYR A 151      26.079  56.669  48.845  1.00 14.73           C  
ATOM   1133  CG  TYR A 151      24.926  55.768  48.433  1.00 11.01           C  
ATOM   1134  CD1 TYR A 151      23.656  56.286  48.511  1.00 11.71           C  
ATOM   1135  CD2 TYR A 151      25.118  54.501  47.905  1.00 11.32           C  
ATOM   1136  CE1 TYR A 151      22.569  55.572  48.061  1.00  9.03           C  
ATOM   1137  CE2 TYR A 151      24.033  53.781  47.452  1.00  8.80           C  
ATOM   1138  CZ  TYR A 151      22.770  54.336  47.526  1.00  8.19           C  
ATOM   1139  OH  TYR A 151      21.668  53.701  47.015  1.00 15.38           O  
ATOM   1140  N   PHE A 152      28.435  56.230  47.190  1.00  4.98           N  
ATOM   1141  CA  PHE A 152      29.404  55.524  46.387  1.00  2.94           C  
ATOM   1142  C   PHE A 152      30.064  54.592  47.371  1.00  7.09           C  
ATOM   1143  O   PHE A 152      30.533  55.045  48.432  1.00  8.66           O  
ATOM   1144  CB  PHE A 152      30.421  56.508  45.875  1.00  5.86           C  
ATOM   1145  CG  PHE A 152      31.572  56.054  45.009  1.00  5.89           C  
ATOM   1146  CD1 PHE A 152      32.713  56.812  45.011  1.00  4.29           C  
ATOM   1147  CD2 PHE A 152      31.458  54.941  44.191  1.00  4.90           C  
ATOM   1148  CE1 PHE A 152      33.763  56.461  44.184  1.00  6.02           C  
ATOM   1149  CE2 PHE A 152      32.506  54.609  43.380  1.00  5.77           C  
ATOM   1150  CZ  PHE A 152      33.660  55.360  43.373  1.00  6.77           C  
ATOM   1151  N   GLY A 153      30.119  53.309  47.074  1.00  5.85           N  
ATOM   1152  CA  GLY A 153      30.741  52.375  47.956  1.00  7.41           C  
ATOM   1153  C   GLY A 153      31.285  51.229  47.172  1.00 13.13           C  
ATOM   1154  O   GLY A 153      30.955  51.045  45.989  1.00 17.83           O  
ATOM   1155  N   ILE A 154      32.151  50.467  47.832  1.00 14.46           N  
ATOM   1156  CA  ILE A 154      32.691  49.259  47.246  1.00 15.59           C  
ATOM   1157  C   ILE A 154      32.718  48.209  48.335  1.00 19.15           C  
ATOM   1158  O   ILE A 154      32.335  48.543  49.465  1.00 19.77           O  
ATOM   1159  CB  ILE A 154      34.140  49.395  46.679  1.00 16.18           C  
ATOM   1160  CG1 ILE A 154      35.052  50.335  47.427  1.00 15.04           C  
ATOM   1161  CG2 ILE A 154      33.940  49.823  45.261  1.00 15.29           C  
ATOM   1162  CD1 ILE A 154      36.427  50.240  46.795  1.00 16.02           C  
ATOM   1163  N   ILE A 155      33.121  46.969  47.974  1.00 19.86           N  
ATOM   1164  CA  ILE A 155      33.214  45.807  48.857  1.00 19.28           C  
ATOM   1165  C   ILE A 155      33.849  44.603  48.137  1.00 22.12           C  
ATOM   1166  O   ILE A 155      33.366  44.174  47.075  1.00 22.12           O  
ATOM   1167  CB  ILE A 155      31.770  45.459  49.408  1.00 17.26           C  
ATOM   1168  CG1 ILE A 155      31.796  44.192  50.276  1.00 20.59           C  
ATOM   1169  CG2 ILE A 155      30.803  45.322  48.263  1.00 19.30           C  
ATOM   1170  CD1 ILE A 155      30.580  43.996  51.212  1.00 17.15           C  
ATOM   1171  N   ALA A 156      34.963  44.061  48.643  1.00 23.07           N  
ATOM   1172  CA  ALA A 156      35.524  42.869  48.001  1.00 25.09           C  
ATOM   1173  C   ALA A 156      34.631  41.653  48.150  1.00 24.85           C  
ATOM   1174  O   ALA A 156      34.003  41.453  49.196  1.00 25.39           O  
ATOM   1175  CB  ALA A 156      36.859  42.456  48.596  1.00 28.46           C  
ATOM   1176  N   LEU A 157      34.562  40.866  47.094  1.00 26.18           N  
ATOM   1177  CA  LEU A 157      33.788  39.642  47.124  1.00 27.63           C  
ATOM   1178  C   LEU A 157      34.713  38.460  46.814  1.00 30.56           C  
ATOM   1179  O   LEU A 157      35.792  38.671  46.218  1.00 34.61           O  
ATOM   1180  CB  LEU A 157      32.677  39.663  46.092  1.00 24.52           C  
ATOM   1181  CG  LEU A 157      31.590  40.671  46.255  1.00 23.07           C  
ATOM   1182  CD1 LEU A 157      31.810  41.583  45.082  1.00 24.65           C  
ATOM   1183  CD2 LEU A 157      30.164  40.088  46.285  1.00 18.96           C  
ATOM   1184  OXT LEU A 157      34.333  37.338  47.161  1.00 32.20           O  
TER    1185      LEU A 157                                                      
ATOM   1186  N   ARG B   6      46.824  30.800  43.607  1.00 64.41           N  
ATOM   1187  CA  ARG B   6      46.892  32.032  42.812  1.00 64.18           C  
ATOM   1188  C   ARG B   6      45.651  32.737  43.313  1.00 61.83           C  
ATOM   1189  O   ARG B   6      44.655  32.031  43.466  1.00 62.89           O  
ATOM   1190  CB  ARG B   6      46.694  31.827  41.299  1.00 64.17           C  
ATOM   1191  N   THR B   7      45.638  34.034  43.555  1.00 59.18           N  
ATOM   1192  CA  THR B   7      44.447  34.613  44.159  1.00 59.19           C  
ATOM   1193  C   THR B   7      43.769  35.740  43.331  1.00 57.12           C  
ATOM   1194  O   THR B   7      43.503  36.844  43.819  1.00 59.02           O  
ATOM   1195  CB  THR B   7      45.037  34.932  45.590  1.00 59.30           C  
ATOM   1196  OG1 THR B   7      45.155  33.630  46.159  1.00 58.04           O  
ATOM   1197  CG2 THR B   7      44.248  35.821  46.528  1.00 61.19           C  
ATOM   1198  N   PRO B   8      43.456  35.544  42.027  1.00 53.73           N  
ATOM   1199  CA  PRO B   8      42.239  36.123  41.441  1.00 49.90           C  
ATOM   1200  C   PRO B   8      41.031  35.775  42.311  1.00 46.32           C  
ATOM   1201  O   PRO B   8      40.629  36.613  43.119  1.00 45.06           O  
ATOM   1202  CB  PRO B   8      42.223  35.539  40.021  1.00 50.73           C  
ATOM   1203  CG  PRO B   8      43.700  35.528  39.649  1.00 50.60           C  
ATOM   1204  CD  PRO B   8      44.385  35.108  40.968  1.00 52.49           C  
ATOM   1205  N   SER B   9      40.492  34.550  42.218  1.00 43.27           N  
ATOM   1206  CA  SER B   9      39.361  34.051  43.008  1.00 39.84           C  
ATOM   1207  C   SER B   9      38.903  32.740  42.353  1.00 40.18           C  
ATOM   1208  O   SER B   9      39.071  32.596  41.129  1.00 40.33           O  
ATOM   1209  CB  SER B   9      38.178  35.022  42.998  1.00 36.07           C  
ATOM   1210  OG  SER B   9      37.305  34.793  44.084  1.00 38.02           O  
ATOM   1211  N   ASP B  10      38.416  31.725  43.089  1.00 38.36           N  
ATOM   1212  CA  ASP B  10      37.829  30.600  42.401  1.00 38.47           C  
ATOM   1213  C   ASP B  10      36.335  30.859  42.616  1.00 35.97           C  
ATOM   1214  O   ASP B  10      35.642  30.107  43.316  1.00 39.48           O  
ATOM   1215  CB  ASP B  10      38.237  29.168  42.970  1.00 42.79           C  
ATOM   1216  CG  ASP B  10      37.859  27.831  42.195  1.00 44.04           C  
ATOM   1217  OD1 ASP B  10      38.362  26.755  42.564  1.00 46.12           O  
ATOM   1218  OD2 ASP B  10      37.071  27.808  41.237  1.00 41.33           O  
ATOM   1219  N   LYS B  11      35.825  31.969  42.055  1.00 30.40           N  
ATOM   1220  CA  LYS B  11      34.394  32.285  42.108  1.00 26.78           C  
ATOM   1221  C   LYS B  11      33.968  32.338  40.654  1.00 22.11           C  
ATOM   1222  O   LYS B  11      34.746  32.944  39.913  1.00 25.99           O  
ATOM   1223  CB  LYS B  11      34.062  33.646  42.673  1.00 29.13           C  
ATOM   1224  CG  LYS B  11      34.257  33.789  44.171  1.00 35.54           C  
ATOM   1225  CD  LYS B  11      32.886  34.006  44.802  1.00 39.15           C  
ATOM   1226  CE  LYS B  11      32.943  34.332  46.302  1.00 42.42           C  
ATOM   1227  NZ  LYS B  11      33.125  33.161  47.160  1.00 43.61           N  
ATOM   1228  N   PRO B  12      32.871  31.726  40.164  1.00 13.88           N  
ATOM   1229  CA  PRO B  12      32.207  32.029  38.908  1.00 11.92           C  
ATOM   1230  C   PRO B  12      31.877  33.477  38.786  1.00  9.98           C  
ATOM   1231  O   PRO B  12      31.127  33.967  39.620  1.00 10.99           O  
ATOM   1232  CB  PRO B  12      30.944  31.213  38.866  1.00 14.28           C  
ATOM   1233  CG  PRO B  12      30.955  30.334  40.074  1.00 13.15           C  
ATOM   1234  CD  PRO B  12      32.325  30.516  40.725  1.00 12.28           C  
ATOM   1235  N   VAL B  13      32.329  34.182  37.775  1.00 11.80           N  
ATOM   1236  CA  VAL B  13      32.045  35.594  37.751  1.00 12.96           C  
ATOM   1237  C   VAL B  13      31.862  35.979  36.319  1.00 15.46           C  
ATOM   1238  O   VAL B  13      32.518  35.386  35.454  1.00 14.70           O  
ATOM   1239  CB  VAL B  13      33.218  36.374  38.357  1.00 16.26           C  
ATOM   1240  CG1 VAL B  13      34.487  36.249  37.482  1.00 16.84           C  
ATOM   1241  CG2 VAL B  13      32.805  37.830  38.508  1.00 18.96           C  
ATOM   1242  N   ALA B  14      31.037  36.969  36.043  1.00 17.08           N  
ATOM   1243  CA  ALA B  14      31.017  37.503  34.700  1.00 23.32           C  
ATOM   1244  C   ALA B  14      30.618  38.985  34.709  1.00 24.30           C  
ATOM   1245  O   ALA B  14      29.929  39.483  35.636  1.00 22.28           O  
ATOM   1246  CB  ALA B  14      30.029  36.724  33.785  1.00 25.49           C  
ATOM   1247  N   HIS B  15      31.152  39.634  33.651  1.00 22.53           N  
ATOM   1248  CA  HIS B  15      30.825  41.000  33.364  1.00 23.40           C  
ATOM   1249  C   HIS B  15      30.972  41.352  31.894  1.00 21.61           C  
ATOM   1250  O   HIS B  15      31.919  42.014  31.494  1.00 19.77           O  
ATOM   1251  CB  HIS B  15      31.683  41.945  34.184  1.00 22.04           C  
ATOM   1252  CG  HIS B  15      31.098  43.360  34.062  1.00 23.53           C  
ATOM   1253  ND1 HIS B  15      29.933  43.805  34.537  1.00 23.67           N  
ATOM   1254  CD2 HIS B  15      31.730  44.409  33.421  1.00 21.26           C  
ATOM   1255  CE1 HIS B  15      29.865  45.072  34.209  1.00 24.02           C  
ATOM   1256  NE2 HIS B  15      30.940  45.429  33.545  1.00 21.50           N  
ATOM   1257  N   VAL B  16      30.004  40.951  31.089  1.00 23.18           N  
ATOM   1258  CA  VAL B  16      30.062  41.306  29.680  1.00 25.76           C  
ATOM   1259  C   VAL B  16      29.404  42.630  29.317  1.00 24.37           C  
ATOM   1260  O   VAL B  16      28.342  43.012  29.831  1.00 21.38           O  
ATOM   1261  CB  VAL B  16      29.457  40.176  28.766  1.00 26.09           C  
ATOM   1262  CG1 VAL B  16      30.377  38.973  28.904  1.00 22.15           C  
ATOM   1263  CG2 VAL B  16      28.031  39.797  29.118  1.00 28.07           C  
ATOM   1264  N   VAL B  17      30.143  43.318  28.447  1.00 25.62           N  
ATOM   1265  CA  VAL B  17      29.734  44.591  27.861  1.00 23.79           C  
ATOM   1266  C   VAL B  17      29.090  44.272  26.510  1.00 21.75           C  
ATOM   1267  O   VAL B  17      29.270  43.181  25.958  1.00 21.59           O  
ATOM   1268  CB  VAL B  17      31.001  45.539  27.727  1.00 22.85           C  
ATOM   1269  CG1 VAL B  17      31.416  45.944  26.312  1.00 16.65           C  
ATOM   1270  CG2 VAL B  17      30.601  46.817  28.482  1.00 26.32           C  
ATOM   1271  N   ALA B  18      28.269  45.197  26.013  1.00 18.40           N  
ATOM   1272  CA  ALA B  18      27.690  44.997  24.715  1.00 18.07           C  
ATOM   1273  C   ALA B  18      28.638  45.519  23.632  1.00 22.05           C  
ATOM   1274  O   ALA B  18      29.420  46.492  23.749  1.00 19.56           O  
ATOM   1275  CB  ALA B  18      26.404  45.725  24.587  1.00 18.07           C  
ATOM   1276  N   ASN B  19      28.578  44.793  22.530  1.00 23.16           N  
ATOM   1277  CA  ASN B  19      29.445  45.076  21.428  1.00 24.28           C  
ATOM   1278  C   ASN B  19      28.963  46.312  20.671  1.00 27.16           C  
ATOM   1279  O   ASN B  19      27.775  46.433  20.342  1.00 27.68           O  
ATOM   1280  CB  ASN B  19      29.443  43.843  20.613  1.00 23.45           C  
ATOM   1281  CG  ASN B  19      30.349  43.834  19.404  1.00 25.44           C  
ATOM   1282  OD1 ASN B  19      30.231  42.857  18.676  1.00 25.02           O  
ATOM   1283  ND2 ASN B  19      31.291  44.738  19.063  1.00 27.56           N  
ATOM   1284  N   PRO B  20      29.849  47.274  20.398  1.00 26.41           N  
ATOM   1285  CA  PRO B  20      29.548  48.431  19.558  1.00 30.01           C  
ATOM   1286  C   PRO B  20      29.382  48.131  18.060  1.00 31.22           C  
ATOM   1287  O   PRO B  20      28.553  48.747  17.384  1.00 33.25           O  
ATOM   1288  CB  PRO B  20      30.685  49.394  19.848  1.00 30.00           C  
ATOM   1289  CG  PRO B  20      31.082  48.978  21.219  1.00 28.27           C  
ATOM   1290  CD  PRO B  20      31.108  47.472  21.077  1.00 25.66           C  
ATOM   1291  N   GLN B  21      30.136  47.209  17.453  1.00 30.06           N  
ATOM   1292  CA  GLN B  21      29.902  46.938  16.043  1.00 29.01           C  
ATOM   1293  C   GLN B  21      28.627  46.166  15.782  1.00 25.68           C  
ATOM   1294  O   GLN B  21      28.600  45.528  14.750  1.00 26.25           O  
ATOM   1295  CB  GLN B  21      31.086  46.150  15.428  1.00 34.27           C  
ATOM   1296  CG  GLN B  21      32.306  46.983  15.031  1.00 37.20           C  
ATOM   1297  CD  GLN B  21      32.814  47.725  16.247  1.00 38.99           C  
ATOM   1298  OE1 GLN B  21      33.481  47.088  17.064  1.00 41.11           O  
ATOM   1299  NE2 GLN B  21      32.433  48.991  16.495  1.00 37.64           N  
ATOM   1300  N   ALA B  22      27.530  46.144  16.528  1.00 24.37           N  
ATOM   1301  CA  ALA B  22      26.465  45.284  16.090  1.00 28.13           C  
ATOM   1302  C   ALA B  22      25.209  46.079  15.836  1.00 32.63           C  
ATOM   1303  O   ALA B  22      24.717  46.792  16.702  1.00 34.27           O  
ATOM   1304  CB  ALA B  22      26.222  44.231  17.125  1.00 28.15           C  
ATOM   1305  N   GLU B  23      24.725  46.055  14.582  1.00 36.69           N  
ATOM   1306  CA  GLU B  23      23.468  46.731  14.271  1.00 38.69           C  
ATOM   1307  C   GLU B  23      22.407  45.978  15.030  1.00 38.35           C  
ATOM   1308  O   GLU B  23      22.607  44.805  15.316  1.00 37.96           O  
ATOM   1309  CB  GLU B  23      23.105  46.720  12.745  1.00 40.01           C  
ATOM   1310  CG  GLU B  23      23.483  45.524  11.889  1.00 45.37           C  
ATOM   1311  CD  GLU B  23      22.478  44.355  11.825  1.00 51.19           C  
ATOM   1312  OE1 GLU B  23      22.121  43.732  12.846  1.00 51.15           O  
ATOM   1313  OE2 GLU B  23      22.058  44.044  10.701  1.00 53.83           O  
ATOM   1314  N   GLY B  24      21.374  46.706  15.435  1.00 38.14           N  
ATOM   1315  CA  GLY B  24      20.171  46.175  16.042  1.00 35.63           C  
ATOM   1316  C   GLY B  24      20.140  44.685  16.335  1.00 34.13           C  
ATOM   1317  O   GLY B  24      19.569  43.847  15.625  1.00 34.14           O  
ATOM   1318  N   GLN B  25      20.937  44.456  17.369  1.00 33.56           N  
ATOM   1319  CA  GLN B  25      21.055  43.196  18.090  1.00 29.13           C  
ATOM   1320  C   GLN B  25      21.871  43.632  19.260  1.00 23.87           C  
ATOM   1321  O   GLN B  25      22.500  44.687  19.218  1.00 22.58           O  
ATOM   1322  CB  GLN B  25      21.837  42.099  17.365  1.00 29.54           C  
ATOM   1323  CG  GLN B  25      23.278  42.410  17.062  1.00 30.52           C  
ATOM   1324  CD  GLN B  25      23.761  41.567  15.915  1.00 30.28           C  
ATOM   1325  OE1 GLN B  25      23.608  41.885  14.735  1.00 29.93           O  
ATOM   1326  NE2 GLN B  25      24.349  40.443  16.291  1.00 29.73           N  
ATOM   1327  N   LEU B  26      21.786  42.783  20.277  1.00 24.38           N  
ATOM   1328  CA  LEU B  26      22.505  42.907  21.530  1.00 20.84           C  
ATOM   1329  C   LEU B  26      23.482  41.720  21.560  1.00 19.45           C  
ATOM   1330  O   LEU B  26      23.145  40.556  21.732  1.00 14.77           O  
ATOM   1331  CB  LEU B  26      21.440  42.872  22.648  1.00 19.14           C  
ATOM   1332  CG  LEU B  26      21.778  42.856  24.119  1.00 17.92           C  
ATOM   1333  CD1 LEU B  26      22.909  43.789  24.452  1.00 15.22           C  
ATOM   1334  CD2 LEU B  26      20.508  43.226  24.856  1.00 19.96           C  
ATOM   1335  N   GLN B  27      24.716  42.025  21.326  1.00 18.06           N  
ATOM   1336  CA  GLN B  27      25.763  41.046  21.254  1.00 22.66           C  
ATOM   1337  C   GLN B  27      26.512  41.316  22.557  1.00 20.05           C  
ATOM   1338  O   GLN B  27      26.862  42.480  22.770  1.00 19.00           O  
ATOM   1339  CB  GLN B  27      26.577  41.388  20.013  1.00 27.83           C  
ATOM   1340  CG  GLN B  27      27.663  40.462  19.498  1.00 34.60           C  
ATOM   1341  CD  GLN B  27      27.089  39.219  18.817  1.00 40.82           C  
ATOM   1342  OE1 GLN B  27      26.061  39.290  18.126  1.00 46.05           O  
ATOM   1343  NE2 GLN B  27      27.690  38.031  18.964  1.00 41.58           N  
ATOM   1344  N   TRP B  28      26.769  40.320  23.410  1.00 18.43           N  
ATOM   1345  CA  TRP B  28      27.515  40.452  24.660  1.00 12.31           C  
ATOM   1346  C   TRP B  28      28.955  40.018  24.428  1.00 12.81           C  
ATOM   1347  O   TRP B  28      29.233  39.131  23.621  1.00 14.09           O  
ATOM   1348  CB  TRP B  28      26.860  39.600  25.726  1.00  8.46           C  
ATOM   1349  CG  TRP B  28      25.575  40.214  26.256  1.00  8.98           C  
ATOM   1350  CD1 TRP B  28      24.392  39.518  26.227  1.00  8.45           C  
ATOM   1351  CD2 TRP B  28      25.449  41.445  26.867  1.00  7.09           C  
ATOM   1352  NE1 TRP B  28      23.514  40.292  26.830  1.00  7.54           N  
ATOM   1353  CE2 TRP B  28      24.096  41.435  27.232  1.00  8.71           C  
ATOM   1354  CE3 TRP B  28      26.232  42.524  27.175  1.00  6.78           C  
ATOM   1355  CZ2 TRP B  28      23.511  42.507  27.914  1.00 10.77           C  
ATOM   1356  CZ3 TRP B  28      25.651  43.593  27.848  1.00 11.22           C  
ATOM   1357  CH2 TRP B  28      24.314  43.596  28.224  1.00  9.03           C  
ATOM   1358  N   LEU B  29      29.904  40.593  25.152  1.00 15.05           N  
ATOM   1359  CA  LEU B  29      31.301  40.465  24.839  1.00 12.74           C  
ATOM   1360  C   LEU B  29      32.098  40.784  26.087  1.00 19.60           C  
ATOM   1361  O   LEU B  29      31.956  41.817  26.778  1.00 16.58           O  
ATOM   1362  CB  LEU B  29      31.637  41.481  23.784  1.00 11.61           C  
ATOM   1363  CG  LEU B  29      32.568  41.392  22.602  1.00 12.34           C  
ATOM   1364  CD1 LEU B  29      31.765  41.038  21.370  1.00 13.96           C  
ATOM   1365  CD2 LEU B  29      33.128  42.742  22.262  1.00  7.45           C  
ATOM   1366  N   ASN B  30      32.966  39.803  26.329  1.00 24.53           N  
ATOM   1367  CA  ASN B  30      34.078  39.934  27.288  1.00 25.97           C  
ATOM   1368  C   ASN B  30      35.275  40.033  26.341  1.00 26.50           C  
ATOM   1369  O   ASN B  30      35.006  40.183  25.149  1.00 28.86           O  
ATOM   1370  CB  ASN B  30      34.240  38.694  28.192  1.00 27.87           C  
ATOM   1371  CG  ASN B  30      34.887  37.491  27.518  1.00 29.44           C  
ATOM   1372  OD1 ASN B  30      35.951  37.063  27.937  1.00 33.43           O  
ATOM   1373  ND2 ASN B  30      34.379  36.915  26.450  1.00 25.84           N  
ATOM   1374  N   ARG B  31      36.570  39.905  26.686  1.00 30.82           N  
ATOM   1375  CA  ARG B  31      37.708  40.048  25.724  1.00 32.10           C  
ATOM   1376  C   ARG B  31      37.724  41.496  25.280  1.00 30.16           C  
ATOM   1377  O   ARG B  31      38.000  41.866  24.139  1.00 29.87           O  
ATOM   1378  CB  ARG B  31      37.571  39.176  24.428  1.00 34.14           C  
ATOM   1379  CG  ARG B  31      38.797  38.866  23.573  1.00 35.05           C  
ATOM   1380  CD  ARG B  31      39.736  37.885  24.281  1.00 39.11           C  
ATOM   1381  NE  ARG B  31      38.996  36.826  24.974  1.00 40.25           N  
ATOM   1382  CZ  ARG B  31      39.425  36.281  26.113  1.00 40.81           C  
ATOM   1383  NH1 ARG B  31      38.635  35.388  26.717  1.00 41.29           N  
ATOM   1384  NH2 ARG B  31      40.628  36.588  26.625  1.00 39.84           N  
ATOM   1385  N   ARG B  32      37.491  42.258  26.338  1.00 29.40           N  
ATOM   1386  CA  ARG B  32      37.256  43.674  26.346  1.00 30.33           C  
ATOM   1387  C   ARG B  32      37.950  44.204  27.592  1.00 30.79           C  
ATOM   1388  O   ARG B  32      38.175  43.425  28.528  1.00 30.93           O  
ATOM   1389  CB  ARG B  32      35.779  43.908  26.441  1.00 30.12           C  
ATOM   1390  CG  ARG B  32      35.122  44.209  25.147  1.00 31.54           C  
ATOM   1391  CD  ARG B  32      35.530  45.608  24.867  1.00 33.91           C  
ATOM   1392  NE  ARG B  32      34.601  46.254  23.974  1.00 37.30           N  
ATOM   1393  CZ  ARG B  32      34.101  47.447  24.334  1.00 40.91           C  
ATOM   1394  NH1 ARG B  32      33.267  48.057  23.502  1.00 41.78           N  
ATOM   1395  NH2 ARG B  32      34.385  48.042  25.516  1.00 39.14           N  
ATOM   1396  N   ALA B  33      38.213  45.514  27.679  1.00 30.69           N  
ATOM   1397  CA  ALA B  33      38.993  46.042  28.794  1.00 29.59           C  
ATOM   1398  C   ALA B  33      38.483  45.956  30.227  1.00 29.25           C  
ATOM   1399  O   ALA B  33      39.304  46.199  31.109  1.00 30.27           O  
ATOM   1400  CB  ALA B  33      39.308  47.497  28.616  1.00 29.76           C  
ATOM   1401  N   ASN B  34      37.223  45.687  30.561  1.00 24.53           N  
ATOM   1402  CA  ASN B  34      36.833  45.582  31.964  1.00 23.70           C  
ATOM   1403  C   ASN B  34      35.687  44.582  32.112  1.00 22.04           C  
ATOM   1404  O   ASN B  34      34.694  44.756  32.824  1.00 19.76           O  
ATOM   1405  CB  ASN B  34      36.430  46.970  32.454  1.00 26.94           C  
ATOM   1406  CG  ASN B  34      37.539  47.695  33.196  1.00 27.00           C  
ATOM   1407  OD1 ASN B  34      37.605  47.595  34.421  1.00 32.86           O  
ATOM   1408  ND2 ASN B  34      38.470  48.429  32.589  1.00 24.01           N  
ATOM   1409  N   ALA B  35      35.864  43.477  31.381  1.00 20.94           N  
ATOM   1410  CA  ALA B  35      34.853  42.457  31.208  1.00 15.76           C  
ATOM   1411  C   ALA B  35      35.554  41.186  31.647  1.00 17.16           C  
ATOM   1412  O   ALA B  35      36.627  40.890  31.133  1.00 21.31           O  
ATOM   1413  CB  ALA B  35      34.464  42.412  29.737  1.00  6.57           C  
ATOM   1414  N   LEU B  36      35.002  40.505  32.645  1.00 15.47           N  
ATOM   1415  CA  LEU B  36      35.536  39.284  33.208  1.00 14.94           C  
ATOM   1416  C   LEU B  36      34.705  38.161  32.658  1.00 14.20           C  
ATOM   1417  O   LEU B  36      33.668  38.422  32.066  1.00 15.01           O  
ATOM   1418  CB  LEU B  36      35.395  39.229  34.728  1.00 16.51           C  
ATOM   1419  CG  LEU B  36      36.105  40.210  35.664  1.00 19.39           C  
ATOM   1420  CD1 LEU B  36      35.197  40.351  36.918  1.00 17.01           C  
ATOM   1421  CD2 LEU B  36      37.569  39.760  35.940  1.00 18.86           C  
ATOM   1422  N   LEU B  37      35.126  36.935  32.967  1.00 15.97           N  
ATOM   1423  CA  LEU B  37      34.497  35.667  32.575  1.00 15.76           C  
ATOM   1424  C   LEU B  37      35.520  34.689  33.105  1.00 15.40           C  
ATOM   1425  O   LEU B  37      36.563  34.472  32.479  1.00 21.27           O  
ATOM   1426  CB  LEU B  37      34.442  35.446  31.083  1.00 12.51           C  
ATOM   1427  CG  LEU B  37      33.227  34.874  30.536  1.00 11.09           C  
ATOM   1428  CD1 LEU B  37      32.073  35.869  30.700  1.00 10.07           C  
ATOM   1429  CD2 LEU B  37      33.498  34.564  29.083  1.00 11.41           C  
ATOM   1430  N   ALA B  38      35.328  34.134  34.276  1.00 12.09           N  
ATOM   1431  CA  ALA B  38      36.370  33.348  34.898  1.00 12.61           C  
ATOM   1432  C   ALA B  38      35.731  32.192  35.628  1.00 14.40           C  
ATOM   1433  O   ALA B  38      34.524  32.249  35.847  1.00 18.58           O  
ATOM   1434  CB  ALA B  38      37.151  34.249  35.872  1.00 13.11           C  
ATOM   1435  N   ASN B  39      36.459  31.142  36.047  1.00 13.27           N  
ATOM   1436  CA  ASN B  39      35.854  30.001  36.746  1.00 10.46           C  
ATOM   1437  C   ASN B  39      34.677  29.248  36.112  1.00 11.21           C  
ATOM   1438  O   ASN B  39      33.625  29.035  36.724  1.00 13.75           O  
ATOM   1439  CB  ASN B  39      35.408  30.438  38.093  1.00 13.67           C  
ATOM   1440  CG  ASN B  39      36.554  30.839  38.972  1.00 17.59           C  
ATOM   1441  OD1 ASN B  39      36.781  30.070  39.864  1.00 20.07           O  
ATOM   1442  ND2 ASN B  39      37.285  31.938  38.928  1.00 13.00           N  
ATOM   1443  N   GLY B  40      34.864  28.856  34.836  1.00 13.20           N  
ATOM   1444  CA  GLY B  40      33.932  28.030  34.099  1.00  7.79           C  
ATOM   1445  C   GLY B  40      32.612  28.658  33.672  1.00  8.14           C  
ATOM   1446  O   GLY B  40      31.780  27.913  33.125  1.00  9.63           O  
ATOM   1447  N   VAL B  41      32.308  29.945  33.931  1.00  6.79           N  
ATOM   1448  CA  VAL B  41      31.111  30.463  33.286  1.00  8.12           C  
ATOM   1449  C   VAL B  41      31.593  30.648  31.829  1.00 12.27           C  
ATOM   1450  O   VAL B  41      32.808  30.762  31.550  1.00 13.23           O  
ATOM   1451  CB  VAL B  41      30.485  31.859  33.900  1.00  6.71           C  
ATOM   1452  CG1 VAL B  41      30.807  31.947  35.350  1.00  4.74           C  
ATOM   1453  CG2 VAL B  41      30.970  33.110  33.256  1.00  7.11           C  
ATOM   1454  N   GLU B  42      30.683  30.521  30.854  1.00 14.73           N  
ATOM   1455  CA  GLU B  42      31.020  30.754  29.461  1.00 17.33           C  
ATOM   1456  C   GLU B  42      29.759  31.291  28.815  1.00 16.22           C  
ATOM   1457  O   GLU B  42      28.613  30.913  29.094  1.00 18.68           O  
ATOM   1458  CB  GLU B  42      31.513  29.451  28.736  1.00 18.17           C  
ATOM   1459  CG  GLU B  42      30.533  28.281  28.641  1.00 25.20           C  
ATOM   1460  CD  GLU B  42      31.065  26.921  28.174  1.00 28.17           C  
ATOM   1461  OE1 GLU B  42      30.582  26.381  27.158  1.00 31.60           O  
ATOM   1462  OE2 GLU B  42      31.941  26.378  28.857  1.00 28.73           O  
ATOM   1463  N   LEU B  43      30.005  32.310  28.027  1.00 16.15           N  
ATOM   1464  CA  LEU B  43      28.954  32.927  27.252  1.00 18.19           C  
ATOM   1465  C   LEU B  43      28.828  32.062  25.992  1.00 18.46           C  
ATOM   1466  O   LEU B  43      29.764  32.021  25.211  1.00 12.07           O  
ATOM   1467  CB  LEU B  43      29.431  34.381  27.040  1.00 18.78           C  
ATOM   1468  CG  LEU B  43      29.408  35.126  25.715  1.00 16.69           C  
ATOM   1469  CD1 LEU B  43      28.035  35.721  25.423  1.00 15.07           C  
ATOM   1470  CD2 LEU B  43      30.522  36.187  25.801  1.00 13.56           C  
ATOM   1471  N   ARG B  44      27.777  31.252  25.836  1.00 25.10           N  
ATOM   1472  CA  ARG B  44      27.689  30.423  24.648  1.00 31.63           C  
ATOM   1473  C   ARG B  44      26.765  31.065  23.625  1.00 33.68           C  
ATOM   1474  O   ARG B  44      27.277  31.920  22.885  1.00 36.91           O  
ATOM   1475  CB  ARG B  44      27.187  28.997  24.950  1.00 37.63           C  
ATOM   1476  CG  ARG B  44      28.119  27.816  24.540  1.00 45.33           C  
ATOM   1477  CD  ARG B  44      28.411  27.512  23.017  1.00 53.94           C  
ATOM   1478  NE  ARG B  44      29.315  26.333  22.829  1.00 60.47           N  
ATOM   1479  CZ  ARG B  44      30.276  26.183  21.863  1.00 61.27           C  
ATOM   1480  NH1 ARG B  44      31.057  25.086  21.826  1.00 59.75           N  
ATOM   1481  NH2 ARG B  44      30.491  27.107  20.912  1.00 63.57           N  
ATOM   1482  N   ASP B  45      25.438  30.876  23.482  1.00 30.35           N  
ATOM   1483  CA  ASP B  45      24.820  31.474  22.287  1.00 28.30           C  
ATOM   1484  C   ASP B  45      24.245  32.854  22.515  1.00 24.43           C  
ATOM   1485  O   ASP B  45      23.099  33.147  22.207  1.00 23.66           O  
ATOM   1486  CB  ASP B  45      23.780  30.478  21.781  1.00 32.66           C  
ATOM   1487  CG  ASP B  45      24.459  29.127  21.502  1.00 34.80           C  
ATOM   1488  OD1 ASP B  45      25.612  29.116  21.020  1.00 31.68           O  
ATOM   1489  OD2 ASP B  45      23.828  28.099  21.804  1.00 34.92           O  
ATOM   1490  N   ASN B  46      25.173  33.693  23.008  1.00 19.59           N  
ATOM   1491  CA  ASN B  46      24.959  35.007  23.595  1.00 15.34           C  
ATOM   1492  C   ASN B  46      24.386  34.997  25.038  1.00 18.65           C  
ATOM   1493  O   ASN B  46      24.011  36.027  25.626  1.00 20.16           O  
ATOM   1494  CB  ASN B  46      24.049  35.800  22.704  1.00 11.21           C  
ATOM   1495  CG  ASN B  46      24.334  37.260  22.797  1.00  5.90           C  
ATOM   1496  OD1 ASN B  46      25.468  37.716  22.910  1.00  7.24           O  
ATOM   1497  ND2 ASN B  46      23.237  37.952  22.696  1.00  2.00           N  
ATOM   1498  N   GLN B  47      24.365  33.804  25.667  1.00 17.97           N  
ATOM   1499  CA  GLN B  47      23.784  33.592  26.993  1.00 15.89           C  
ATOM   1500  C   GLN B  47      24.887  33.176  27.922  1.00 14.78           C  
ATOM   1501  O   GLN B  47      25.962  32.791  27.444  1.00 15.12           O  
ATOM   1502  CB  GLN B  47      22.772  32.470  26.988  1.00 17.71           C  
ATOM   1503  CG  GLN B  47      21.600  32.895  26.145  1.00 19.80           C  
ATOM   1504  CD  GLN B  47      20.653  31.799  25.698  1.00 19.26           C  
ATOM   1505  OE1 GLN B  47      20.997  30.635  25.555  1.00 18.69           O  
ATOM   1506  NE2 GLN B  47      19.425  32.179  25.418  1.00 21.02           N  
ATOM   1507  N   LEU B  48      24.601  33.199  29.223  1.00 13.73           N  
ATOM   1508  CA  LEU B  48      25.593  32.818  30.187  1.00 12.31           C  
ATOM   1509  C   LEU B  48      25.275  31.470  30.751  1.00 14.33           C  
ATOM   1510  O   LEU B  48      24.156  31.321  31.214  1.00 10.95           O  
ATOM   1511  CB  LEU B  48      25.667  33.827  31.290  1.00 12.46           C  
ATOM   1512  CG  LEU B  48      26.398  35.137  30.888  1.00 18.62           C  
ATOM   1513  CD1 LEU B  48      26.194  36.186  32.004  1.00 18.71           C  
ATOM   1514  CD2 LEU B  48      27.884  34.854  30.571  1.00 15.01           C  
ATOM   1515  N   VAL B  49      26.224  30.509  30.618  1.00 16.55           N  
ATOM   1516  CA  VAL B  49      26.093  29.159  31.185  1.00 16.23           C  
ATOM   1517  C   VAL B  49      26.685  29.046  32.596  1.00 15.24           C  
ATOM   1518  O   VAL B  49      27.844  29.393  32.851  1.00 16.28           O  
ATOM   1519  CB  VAL B  49      26.762  28.099  30.275  1.00 16.73           C  
ATOM   1520  CG1 VAL B  49      26.357  26.722  30.807  1.00 17.92           C  
ATOM   1521  CG2 VAL B  49      26.378  28.301  28.825  1.00 11.34           C  
ATOM   1522  N   VAL B  50      25.870  28.592  33.533  1.00 16.62           N  
ATOM   1523  CA  VAL B  50      26.280  28.528  34.923  1.00 22.36           C  
ATOM   1524  C   VAL B  50      27.010  27.253  35.340  1.00 24.15           C  
ATOM   1525  O   VAL B  50      26.436  26.157  35.254  1.00 23.60           O  
ATOM   1526  CB  VAL B  50      25.038  28.759  35.804  1.00 22.48           C  
ATOM   1527  CG1 VAL B  50      25.031  28.016  37.141  1.00 25.05           C  
ATOM   1528  CG2 VAL B  50      25.053  30.252  36.071  1.00 25.88           C  
ATOM   1529  N   PRO B  51      28.242  27.427  35.859  1.00 23.77           N  
ATOM   1530  CA  PRO B  51      29.176  26.349  36.094  1.00 22.62           C  
ATOM   1531  C   PRO B  51      28.727  25.462  37.248  1.00 26.06           C  
ATOM   1532  O   PRO B  51      28.442  24.294  36.982  1.00 28.52           O  
ATOM   1533  CB  PRO B  51      30.479  27.082  36.306  1.00 23.02           C  
ATOM   1534  CG  PRO B  51      30.071  28.358  36.996  1.00 23.72           C  
ATOM   1535  CD  PRO B  51      28.810  28.729  36.244  1.00 23.66           C  
ATOM   1536  N   SER B  52      28.585  25.952  38.494  1.00 26.69           N  
ATOM   1537  CA  SER B  52      28.221  25.155  39.667  1.00 23.81           C  
ATOM   1538  C   SER B  52      26.910  25.568  40.307  1.00 20.50           C  
ATOM   1539  O   SER B  52      26.431  26.681  40.071  1.00 17.64           O  
ATOM   1540  CB  SER B  52      29.314  25.295  40.705  1.00 26.40           C  
ATOM   1541  OG  SER B  52      29.615  26.660  40.987  1.00 27.61           O  
ATOM   1542  N   GLU B  53      26.358  24.726  41.178  1.00 17.57           N  
ATOM   1543  CA  GLU B  53      25.137  25.129  41.846  1.00 22.06           C  
ATOM   1544  C   GLU B  53      25.582  26.160  42.868  1.00 20.65           C  
ATOM   1545  O   GLU B  53      26.640  25.959  43.478  1.00 26.44           O  
ATOM   1546  CB  GLU B  53      24.466  23.953  42.556  1.00 26.74           C  
ATOM   1547  CG  GLU B  53      22.980  23.680  42.195  1.00 31.48           C  
ATOM   1548  CD  GLU B  53      22.246  22.786  43.224  1.00 35.83           C  
ATOM   1549  OE1 GLU B  53      21.677  23.364  44.172  1.00 37.57           O  
ATOM   1550  OE2 GLU B  53      22.238  21.539  43.090  1.00 33.75           O  
ATOM   1551  N   GLY B  54      24.835  27.250  43.031  1.00 17.97           N  
ATOM   1552  CA  GLY B  54      25.202  28.305  43.948  1.00 15.63           C  
ATOM   1553  C   GLY B  54      24.098  29.335  44.017  1.00 17.64           C  
ATOM   1554  O   GLY B  54      23.001  29.208  43.426  1.00 20.48           O  
ATOM   1555  N   LEU B  55      24.372  30.401  44.724  1.00 15.60           N  
ATOM   1556  CA  LEU B  55      23.351  31.422  44.842  1.00 16.80           C  
ATOM   1557  C   LEU B  55      24.015  32.538  44.052  1.00 13.18           C  
ATOM   1558  O   LEU B  55      25.198  32.758  44.170  1.00 11.90           O  
ATOM   1559  CB  LEU B  55      23.177  31.626  46.369  1.00 17.29           C  
ATOM   1560  CG  LEU B  55      21.798  31.852  47.022  1.00 18.42           C  
ATOM   1561  CD1 LEU B  55      20.714  31.272  46.208  1.00 15.23           C  
ATOM   1562  CD2 LEU B  55      21.811  31.250  48.433  1.00 18.81           C  
ATOM   1563  N   TYR B  56      23.413  33.218  43.111  1.00 13.24           N  
ATOM   1564  CA  TYR B  56      24.137  34.168  42.294  1.00 11.89           C  
ATOM   1565  C   TYR B  56      23.395  35.507  42.277  1.00 12.07           C  
ATOM   1566  O   TYR B  56      22.157  35.571  42.265  1.00 12.96           O  
ATOM   1567  CB  TYR B  56      24.263  33.650  40.853  1.00 10.09           C  
ATOM   1568  CG  TYR B  56      25.143  32.462  40.461  1.00 10.19           C  
ATOM   1569  CD1 TYR B  56      24.678  31.166  40.564  1.00 11.05           C  
ATOM   1570  CD2 TYR B  56      26.403  32.656  39.915  1.00 11.75           C  
ATOM   1571  CE1 TYR B  56      25.445  30.086  40.125  1.00 10.61           C  
ATOM   1572  CE2 TYR B  56      27.170  31.584  39.483  1.00 10.02           C  
ATOM   1573  CZ  TYR B  56      26.688  30.298  39.587  1.00  9.72           C  
ATOM   1574  OH  TYR B  56      27.413  29.207  39.156  1.00  9.95           O  
ATOM   1575  N   LEU B  57      24.191  36.577  42.376  1.00 11.20           N  
ATOM   1576  CA  LEU B  57      23.732  37.925  42.148  1.00 12.85           C  
ATOM   1577  C   LEU B  57      23.820  38.018  40.632  1.00 14.38           C  
ATOM   1578  O   LEU B  57      24.903  37.811  40.062  1.00 14.95           O  
ATOM   1579  CB  LEU B  57      24.676  38.993  42.797  1.00 11.78           C  
ATOM   1580  CG  LEU B  57      24.810  40.460  42.226  1.00  7.67           C  
ATOM   1581  CD1 LEU B  57      23.475  41.193  42.244  1.00  9.70           C  
ATOM   1582  CD2 LEU B  57      25.812  41.219  43.036  1.00  2.00           C  
ATOM   1583  N   ILE B  58      22.685  38.263  39.979  1.00 18.67           N  
ATOM   1584  CA  ILE B  58      22.616  38.488  38.509  1.00 15.27           C  
ATOM   1585  C   ILE B  58      22.190  39.952  38.285  1.00 15.33           C  
ATOM   1586  O   ILE B  58      21.124  40.331  38.779  1.00 18.41           O  
ATOM   1587  CB  ILE B  58      21.586  37.602  37.847  1.00  8.56           C  
ATOM   1588  CG1 ILE B  58      21.660  36.136  38.331  1.00  7.45           C  
ATOM   1589  CG2 ILE B  58      21.805  37.836  36.367  1.00  9.20           C  
ATOM   1590  CD1 ILE B  58      20.427  35.247  38.155  1.00  3.27           C  
ATOM   1591  N   TYR B  59      22.961  40.801  37.605  1.00 12.59           N  
ATOM   1592  CA  TYR B  59      22.571  42.181  37.407  1.00  9.72           C  
ATOM   1593  C   TYR B  59      22.623  42.609  35.924  1.00  8.31           C  
ATOM   1594  O   TYR B  59      23.167  41.853  35.110  1.00  7.16           O  
ATOM   1595  CB  TYR B  59      23.480  43.016  38.316  1.00  6.20           C  
ATOM   1596  CG  TYR B  59      24.962  42.965  38.012  1.00  4.91           C  
ATOM   1597  CD1 TYR B  59      25.499  43.941  37.214  1.00  2.87           C  
ATOM   1598  CD2 TYR B  59      25.753  41.956  38.505  1.00  6.21           C  
ATOM   1599  CE1 TYR B  59      26.811  43.904  36.897  1.00  5.74           C  
ATOM   1600  CE2 TYR B  59      27.089  41.919  38.198  1.00  3.69           C  
ATOM   1601  CZ  TYR B  59      27.603  42.893  37.389  1.00  7.64           C  
ATOM   1602  OH  TYR B  59      28.941  42.845  36.995  1.00 10.96           O  
ATOM   1603  N   SER B  60      22.138  43.785  35.504  1.00  6.60           N  
ATOM   1604  CA  SER B  60      22.071  44.150  34.095  1.00  6.38           C  
ATOM   1605  C   SER B  60      21.675  45.604  33.840  1.00  9.36           C  
ATOM   1606  O   SER B  60      20.647  46.082  34.372  1.00  6.50           O  
ATOM   1607  CB  SER B  60      21.051  43.236  33.416  1.00  9.01           C  
ATOM   1608  OG  SER B  60      21.077  43.105  32.007  1.00 15.57           O  
ATOM   1609  N   GLN B  61      22.440  46.313  32.982  1.00 10.35           N  
ATOM   1610  CA  GLN B  61      22.032  47.655  32.562  1.00 11.05           C  
ATOM   1611  C   GLN B  61      22.178  47.822  31.051  1.00 13.53           C  
ATOM   1612  O   GLN B  61      23.116  47.318  30.435  1.00 11.61           O  
ATOM   1613  CB  GLN B  61      22.856  48.739  33.248  1.00  9.86           C  
ATOM   1614  CG  GLN B  61      22.600  50.204  32.860  1.00 11.46           C  
ATOM   1615  CD  GLN B  61      23.593  51.171  33.489  1.00 14.58           C  
ATOM   1616  OE1 GLN B  61      24.753  51.337  33.102  1.00 14.11           O  
ATOM   1617  NE2 GLN B  61      23.214  51.785  34.589  1.00 17.69           N  
ATOM   1618  N   VAL B  62      21.157  48.516  30.517  1.00 13.26           N  
ATOM   1619  CA  VAL B  62      20.981  48.923  29.129  1.00  7.63           C  
ATOM   1620  C   VAL B  62      20.526  50.379  29.090  1.00 10.24           C  
ATOM   1621  O   VAL B  62      19.734  50.841  29.928  1.00 11.35           O  
ATOM   1622  CB  VAL B  62      19.925  48.087  28.383  1.00  7.20           C  
ATOM   1623  CG1 VAL B  62      20.477  46.670  28.180  1.00  8.40           C  
ATOM   1624  CG2 VAL B  62      18.601  48.106  29.112  1.00  4.13           C  
ATOM   1625  N   LEU B  63      21.188  51.129  28.213  1.00 11.49           N  
ATOM   1626  CA  LEU B  63      20.884  52.508  27.921  1.00  9.94           C  
ATOM   1627  C   LEU B  63      20.188  52.498  26.549  1.00 12.91           C  
ATOM   1628  O   LEU B  63      20.480  51.707  25.629  1.00 14.54           O  
ATOM   1629  CB  LEU B  63      22.173  53.358  27.867  1.00  6.09           C  
ATOM   1630  CG  LEU B  63      22.241  54.669  28.756  1.00  8.11           C  
ATOM   1631  CD1 LEU B  63      23.265  55.655  28.232  1.00  2.13           C  
ATOM   1632  CD2 LEU B  63      20.892  55.413  28.729  1.00  5.89           C  
ATOM   1633  N   PHE B  64      19.213  53.382  26.433  1.00 11.15           N  
ATOM   1634  CA  PHE B  64      18.459  53.543  25.218  1.00 12.05           C  
ATOM   1635  C   PHE B  64      18.468  55.035  24.946  1.00 16.16           C  
ATOM   1636  O   PHE B  64      18.333  55.824  25.888  1.00 15.85           O  
ATOM   1637  CB  PHE B  64      17.002  53.124  25.394  1.00 10.73           C  
ATOM   1638  CG  PHE B  64      16.659  51.653  25.581  1.00  7.22           C  
ATOM   1639  CD1 PHE B  64      16.402  51.156  26.835  1.00  5.66           C  
ATOM   1640  CD2 PHE B  64      16.551  50.825  24.479  1.00  9.18           C  
ATOM   1641  CE1 PHE B  64      16.028  49.826  26.982  1.00 11.58           C  
ATOM   1642  CE2 PHE B  64      16.176  49.492  24.638  1.00 12.29           C  
ATOM   1643  CZ  PHE B  64      15.906  48.978  25.891  1.00 10.89           C  
ATOM   1644  N   LYS B  65      18.670  55.482  23.712  1.00 18.31           N  
ATOM   1645  CA  LYS B  65      18.540  56.883  23.375  1.00 19.66           C  
ATOM   1646  C   LYS B  65      17.749  56.901  22.085  1.00 19.17           C  
ATOM   1647  O   LYS B  65      17.799  55.989  21.260  1.00 21.92           O  
ATOM   1648  CB  LYS B  65      19.916  57.614  23.158  1.00 22.82           C  
ATOM   1649  CG  LYS B  65      20.530  57.816  21.786  1.00 29.01           C  
ATOM   1650  CD  LYS B  65      21.107  56.466  21.298  1.00 37.22           C  
ATOM   1651  CE  LYS B  65      21.549  56.355  19.798  1.00 39.97           C  
ATOM   1652  NZ  LYS B  65      22.532  55.281  19.563  1.00 40.31           N  
ATOM   1653  N   GLY B  66      16.958  57.929  21.925  1.00 18.29           N  
ATOM   1654  CA  GLY B  66      16.221  58.112  20.717  1.00 20.85           C  
ATOM   1655  C   GLY B  66      16.029  59.585  20.619  1.00 22.55           C  
ATOM   1656  O   GLY B  66      15.799  60.238  21.631  1.00 25.72           O  
ATOM   1657  N   GLN B  67      16.279  60.181  19.471  1.00 24.55           N  
ATOM   1658  CA  GLN B  67      15.918  61.579  19.330  1.00 24.86           C  
ATOM   1659  C   GLN B  67      14.457  61.578  18.918  1.00 22.80           C  
ATOM   1660  O   GLN B  67      14.004  60.592  18.326  1.00 24.31           O  
ATOM   1661  CB  GLN B  67      16.654  62.314  18.237  1.00 29.65           C  
ATOM   1662  CG  GLN B  67      17.704  61.662  17.345  1.00 33.78           C  
ATOM   1663  CD  GLN B  67      18.538  62.819  16.789  1.00 39.72           C  
ATOM   1664  OE1 GLN B  67      18.822  63.808  17.506  1.00 39.32           O  
ATOM   1665  NE2 GLN B  67      18.925  62.720  15.508  1.00 39.89           N  
ATOM   1666  N   GLY B  68      13.716  62.644  19.200  1.00 17.75           N  
ATOM   1667  CA  GLY B  68      12.322  62.678  18.852  1.00 15.74           C  
ATOM   1668  C   GLY B  68      11.478  61.581  19.490  1.00 13.82           C  
ATOM   1669  O   GLY B  68      11.948  60.525  19.871  1.00 11.86           O  
ATOM   1670  N   CYS B  69      10.202  61.890  19.636  1.00 18.81           N  
ATOM   1671  CA  CYS B  69       9.207  60.985  20.169  1.00 23.05           C  
ATOM   1672  C   CYS B  69       8.169  60.564  19.150  1.00 29.14           C  
ATOM   1673  O   CYS B  69       7.277  61.361  18.767  1.00 32.05           O  
ATOM   1674  CB  CYS B  69       8.456  61.580  21.351  1.00 18.69           C  
ATOM   1675  SG  CYS B  69       9.331  60.950  22.777  1.00 22.83           S  
ATOM   1676  N   PRO B  70       8.315  59.313  18.684  1.00 31.65           N  
ATOM   1677  CA  PRO B  70       7.505  58.738  17.618  1.00 33.99           C  
ATOM   1678  C   PRO B  70       6.057  58.604  18.087  1.00 37.00           C  
ATOM   1679  O   PRO B  70       5.743  58.793  19.267  1.00 37.27           O  
ATOM   1680  CB  PRO B  70       8.187  57.418  17.346  1.00 35.18           C  
ATOM   1681  CG  PRO B  70       9.577  57.524  17.990  1.00 34.91           C  
ATOM   1682  CD  PRO B  70       9.227  58.313  19.228  1.00 32.65           C  
ATOM   1683  N   SER B  71       5.161  58.269  17.168  1.00 40.11           N  
ATOM   1684  CA  SER B  71       3.756  58.093  17.529  1.00 43.71           C  
ATOM   1685  C   SER B  71       3.551  56.794  18.323  1.00 44.26           C  
ATOM   1686  O   SER B  71       4.375  55.863  18.497  1.00 37.68           O  
ATOM   1687  CB  SER B  71       2.873  58.106  16.211  1.00 44.21           C  
ATOM   1688  OG  SER B  71       1.446  58.138  16.343  1.00 41.37           O  
ATOM   1689  N   THR B  72       2.276  56.869  18.709  1.00 47.78           N  
ATOM   1690  CA  THR B  72       1.574  55.907  19.550  1.00 50.20           C  
ATOM   1691  C   THR B  72       2.447  55.561  20.789  1.00 47.46           C  
ATOM   1692  O   THR B  72       2.799  56.491  21.565  1.00 48.20           O  
ATOM   1693  CB  THR B  72       1.184  54.679  18.617  1.00 51.04           C  
ATOM   1694  OG1 THR B  72       0.580  55.103  17.372  1.00 49.23           O  
ATOM   1695  CG2 THR B  72       0.137  53.845  19.361  1.00 51.95           C  
ATOM   1696  N   HIS B  73       2.809  54.324  21.107  1.00 41.99           N  
ATOM   1697  CA  HIS B  73       3.652  54.147  22.260  1.00 37.11           C  
ATOM   1698  C   HIS B  73       4.638  53.047  22.039  1.00 32.94           C  
ATOM   1699  O   HIS B  73       4.301  51.886  21.787  1.00 32.39           O  
ATOM   1700  CB  HIS B  73       2.823  53.851  23.503  1.00 39.60           C  
ATOM   1701  CG  HIS B  73       3.039  54.927  24.573  1.00 40.36           C  
ATOM   1702  ND1 HIS B  73       3.343  56.214  24.399  1.00 42.20           N  
ATOM   1703  CD2 HIS B  73       2.872  54.736  25.926  1.00 41.49           C  
ATOM   1704  CE1 HIS B  73       3.339  56.782  25.586  1.00 41.08           C  
ATOM   1705  NE2 HIS B  73       3.060  55.896  26.495  1.00 41.01           N  
ATOM   1706  N   VAL B  74       5.835  53.613  22.112  1.00 26.99           N  
ATOM   1707  CA  VAL B  74       7.049  52.872  21.996  1.00 26.72           C  
ATOM   1708  C   VAL B  74       7.193  51.801  23.080  1.00 26.31           C  
ATOM   1709  O   VAL B  74       7.254  50.656  22.649  1.00 29.87           O  
ATOM   1710  CB  VAL B  74       8.280  53.862  21.997  1.00 29.50           C  
ATOM   1711  CG1 VAL B  74       9.573  53.038  21.964  1.00 29.26           C  
ATOM   1712  CG2 VAL B  74       8.328  54.762  20.733  1.00 27.76           C  
ATOM   1713  N   LEU B  75       7.177  52.006  24.405  1.00 19.98           N  
ATOM   1714  CA  LEU B  75       7.476  50.908  25.351  1.00 15.20           C  
ATOM   1715  C   LEU B  75       8.809  50.158  25.082  1.00 16.24           C  
ATOM   1716  O   LEU B  75       9.032  49.471  24.087  1.00 16.35           O  
ATOM   1717  CB  LEU B  75       6.329  49.880  25.399  1.00 13.11           C  
ATOM   1718  CG  LEU B  75       5.024  50.310  26.072  1.00 14.81           C  
ATOM   1719  CD1 LEU B  75       3.873  49.303  25.947  1.00  9.85           C  
ATOM   1720  CD2 LEU B  75       5.387  50.519  27.505  1.00 15.41           C  
ATOM   1721  N   LEU B  76       9.798  50.344  25.944  1.00 12.26           N  
ATOM   1722  CA  LEU B  76      11.080  49.691  25.833  1.00 12.20           C  
ATOM   1723  C   LEU B  76      11.137  48.688  27.009  1.00 16.23           C  
ATOM   1724  O   LEU B  76      10.713  49.018  28.148  1.00 15.72           O  
ATOM   1725  CB  LEU B  76      12.186  50.684  26.008  1.00 13.62           C  
ATOM   1726  CG  LEU B  76      12.048  52.126  25.596  1.00 11.29           C  
ATOM   1727  CD1 LEU B  76      13.130  52.943  26.311  1.00  7.44           C  
ATOM   1728  CD2 LEU B  76      12.189  52.251  24.110  1.00 11.41           C  
ATOM   1729  N   THR B  77      11.612  47.457  26.768  1.00 10.25           N  
ATOM   1730  CA  THR B  77      11.671  46.512  27.831  1.00  7.68           C  
ATOM   1731  C   THR B  77      13.053  45.893  27.913  1.00 10.31           C  
ATOM   1732  O   THR B  77      13.954  45.998  27.060  1.00 11.35           O  
ATOM   1733  CB  THR B  77      10.550  45.419  27.655  1.00 10.51           C  
ATOM   1734  OG1 THR B  77      10.948  44.532  26.620  1.00 13.04           O  
ATOM   1735  CG2 THR B  77       9.152  46.040  27.365  1.00  8.23           C  
ATOM   1736  N   HIS B  78      13.262  45.326  29.087  1.00 12.09           N  
ATOM   1737  CA  HIS B  78      14.523  44.692  29.390  1.00 12.54           C  
ATOM   1738  C   HIS B  78      14.231  43.588  30.404  1.00 11.62           C  
ATOM   1739  O   HIS B  78      13.570  43.874  31.405  1.00  7.48           O  
ATOM   1740  CB  HIS B  78      15.433  45.786  29.910  1.00 11.99           C  
ATOM   1741  CG  HIS B  78      16.757  45.274  30.427  1.00 14.86           C  
ATOM   1742  ND1 HIS B  78      17.393  45.719  31.500  1.00 19.47           N  
ATOM   1743  CD2 HIS B  78      17.509  44.271  29.876  1.00 16.62           C  
ATOM   1744  CE1 HIS B  78      18.492  45.034  31.625  1.00 18.01           C  
ATOM   1745  NE2 HIS B  78      18.550  44.171  30.657  1.00 18.18           N  
ATOM   1746  N   THR B  79      14.660  42.349  30.128  1.00  6.77           N  
ATOM   1747  CA  THR B  79      14.458  41.272  31.068  1.00 13.36           C  
ATOM   1748  C   THR B  79      15.650  40.304  31.049  1.00 12.21           C  
ATOM   1749  O   THR B  79      16.544  40.361  30.191  1.00  7.79           O  
ATOM   1750  CB  THR B  79      13.120  40.453  30.775  1.00 14.95           C  
ATOM   1751  OG1 THR B  79      13.264  39.963  29.458  1.00 17.46           O  
ATOM   1752  CG2 THR B  79      11.812  41.247  30.751  1.00 19.78           C  
ATOM   1753  N   ILE B  80      15.694  39.495  32.091  1.00  7.89           N  
ATOM   1754  CA  ILE B  80      16.695  38.478  32.209  1.00  9.19           C  
ATOM   1755  C   ILE B  80      15.837  37.237  32.480  1.00 12.33           C  
ATOM   1756  O   ILE B  80      14.875  37.218  33.272  1.00  9.10           O  
ATOM   1757  CB  ILE B  80      17.706  38.755  33.386  1.00  6.62           C  
ATOM   1758  CG1 ILE B  80      18.377  40.093  33.211  1.00  3.78           C  
ATOM   1759  CG2 ILE B  80      18.720  37.624  33.468  1.00  6.11           C  
ATOM   1760  CD1 ILE B  80      19.536  40.345  34.145  1.00  7.07           C  
ATOM   1761  N   SER B  81      16.205  36.187  31.762  1.00 14.46           N  
ATOM   1762  CA  SER B  81      15.489  34.920  31.818  1.00 15.54           C  
ATOM   1763  C   SER B  81      16.559  33.939  32.135  1.00 11.54           C  
ATOM   1764  O   SER B  81      17.729  34.151  31.742  1.00  7.69           O  
ATOM   1765  CB  SER B  81      14.885  34.483  30.472  1.00 17.31           C  
ATOM   1766  OG  SER B  81      14.632  35.609  29.631  1.00 26.60           O  
ATOM   1767  N   ARG B  82      16.078  32.944  32.875  1.00  8.29           N  
ATOM   1768  CA  ARG B  82      16.896  31.803  33.186  1.00 13.47           C  
ATOM   1769  C   ARG B  82      16.299  30.786  32.268  1.00 11.81           C  
ATOM   1770  O   ARG B  82      15.097  30.697  32.139  1.00 17.56           O  
ATOM   1771  CB  ARG B  82      16.737  31.498  34.674  1.00 16.16           C  
ATOM   1772  CG  ARG B  82      16.002  30.313  35.312  1.00 18.34           C  
ATOM   1773  CD  ARG B  82      16.982  29.272  35.864  1.00 19.21           C  
ATOM   1774  NE  ARG B  82      16.391  28.647  37.023  1.00 21.65           N  
ATOM   1775  CZ  ARG B  82      16.644  27.380  37.400  1.00 25.08           C  
ATOM   1776  NH1 ARG B  82      16.034  26.878  38.491  1.00 25.17           N  
ATOM   1777  NH2 ARG B  82      17.504  26.590  36.745  1.00 24.94           N  
ATOM   1778  N   ILE B  83      17.092  30.209  31.411  1.00 17.58           N  
ATOM   1779  CA  ILE B  83      16.683  29.140  30.554  1.00 16.27           C  
ATOM   1780  C   ILE B  83      17.461  28.012  31.233  1.00 18.44           C  
ATOM   1781  O   ILE B  83      18.682  27.891  31.283  1.00 16.99           O  
ATOM   1782  CB  ILE B  83      17.043  29.471  28.996  1.00 19.44           C  
ATOM   1783  CG1 ILE B  83      17.617  28.245  28.419  1.00 21.11           C  
ATOM   1784  CG2 ILE B  83      18.031  30.568  28.706  1.00 19.94           C  
ATOM   1785  CD1 ILE B  83      16.494  27.253  28.202  1.00 21.43           C  
ATOM   1786  N   ALA B  84      16.596  27.272  31.932  1.00 21.57           N  
ATOM   1787  CA  ALA B  84      16.915  26.112  32.763  1.00 18.17           C  
ATOM   1788  C   ALA B  84      17.781  24.953  32.250  1.00 19.37           C  
ATOM   1789  O   ALA B  84      18.728  25.122  31.508  1.00 19.57           O  
ATOM   1790  CB  ALA B  84      15.580  25.592  33.208  1.00 17.67           C  
ATOM   1791  N   VAL B  85      17.562  23.756  32.764  1.00 23.07           N  
ATOM   1792  CA  VAL B  85      18.163  22.494  32.325  1.00 25.56           C  
ATOM   1793  C   VAL B  85      17.042  21.445  32.391  1.00 30.11           C  
ATOM   1794  O   VAL B  85      17.063  20.517  31.584  1.00 28.70           O  
ATOM   1795  CB  VAL B  85      19.318  21.980  33.221  1.00 25.12           C  
ATOM   1796  CG1 VAL B  85      20.615  22.456  32.658  1.00 23.52           C  
ATOM   1797  CG2 VAL B  85      19.204  22.502  34.642  1.00 26.82           C  
ATOM   1798  N   SER B  86      16.075  21.572  33.346  1.00 33.73           N  
ATOM   1799  CA  SER B  86      14.891  20.729  33.464  1.00 36.59           C  
ATOM   1800  C   SER B  86      13.870  21.408  32.574  1.00 40.77           C  
ATOM   1801  O   SER B  86      14.087  21.296  31.364  1.00 41.29           O  
ATOM   1802  CB  SER B  86      14.358  20.679  34.884  1.00 36.00           C  
ATOM   1803  OG  SER B  86      15.201  21.352  35.807  1.00 39.04           O  
ATOM   1804  N   TYR B  87      12.851  22.183  33.028  1.00 44.21           N  
ATOM   1805  CA  TYR B  87      11.836  22.849  32.174  1.00 46.25           C  
ATOM   1806  C   TYR B  87      12.391  24.090  31.430  1.00 45.68           C  
ATOM   1807  O   TYR B  87      11.812  25.169  31.348  1.00 45.86           O  
ATOM   1808  CB  TYR B  87      10.655  23.153  33.140  1.00 50.10           C  
ATOM   1809  CG  TYR B  87       9.484  24.091  32.798  1.00 53.30           C  
ATOM   1810  CD1 TYR B  87       9.519  25.435  33.138  1.00 55.59           C  
ATOM   1811  CD2 TYR B  87       8.321  23.593  32.252  1.00 55.39           C  
ATOM   1812  CE1 TYR B  87       8.399  26.226  32.949  1.00 57.38           C  
ATOM   1813  CE2 TYR B  87       7.194  24.375  32.045  1.00 56.86           C  
ATOM   1814  CZ  TYR B  87       7.228  25.702  32.410  1.00 57.55           C  
ATOM   1815  OH  TYR B  87       6.072  26.470  32.323  1.00 55.97           O  
ATOM   1816  N   GLN B  88      13.516  23.808  30.780  1.00 45.34           N  
ATOM   1817  CA  GLN B  88      14.432  24.669  30.066  1.00 45.23           C  
ATOM   1818  C   GLN B  88      13.786  25.485  28.918  1.00 43.41           C  
ATOM   1819  O   GLN B  88      14.065  25.262  27.749  1.00 40.86           O  
ATOM   1820  CB  GLN B  88      15.533  23.636  29.671  1.00 49.00           C  
ATOM   1821  CG  GLN B  88      16.936  23.707  28.981  1.00 53.27           C  
ATOM   1822  CD  GLN B  88      17.544  22.350  28.455  1.00 54.31           C  
ATOM   1823  OE1 GLN B  88      18.100  22.295  27.351  1.00 53.33           O  
ATOM   1824  NE2 GLN B  88      17.482  21.171  29.081  1.00 51.81           N  
ATOM   1825  N   THR B  89      12.845  26.394  29.188  1.00 39.23           N  
ATOM   1826  CA  THR B  89      12.383  27.442  28.287  1.00 31.60           C  
ATOM   1827  C   THR B  89      12.690  28.699  29.132  1.00 28.11           C  
ATOM   1828  O   THR B  89      13.229  28.576  30.249  1.00 29.42           O  
ATOM   1829  CB  THR B  89      10.851  27.390  27.988  1.00 31.05           C  
ATOM   1830  OG1 THR B  89      10.157  27.034  29.182  1.00 31.60           O  
ATOM   1831  CG2 THR B  89      10.584  26.511  26.762  1.00 33.80           C  
ATOM   1832  N   LYS B  90      12.337  29.909  28.688  1.00 22.12           N  
ATOM   1833  CA  LYS B  90      12.678  31.129  29.410  1.00 21.98           C  
ATOM   1834  C   LYS B  90      11.826  31.372  30.668  1.00 21.78           C  
ATOM   1835  O   LYS B  90      10.604  31.474  30.487  1.00 22.23           O  
ATOM   1836  CB  LYS B  90      12.507  32.375  28.499  1.00 19.85           C  
ATOM   1837  CG  LYS B  90      13.263  32.493  27.180  1.00 16.79           C  
ATOM   1838  CD  LYS B  90      14.739  32.732  27.353  1.00 15.19           C  
ATOM   1839  CE  LYS B  90      15.536  32.506  26.068  1.00 13.49           C  
ATOM   1840  NZ  LYS B  90      15.108  33.323  24.959  1.00 11.74           N  
ATOM   1841  N   VAL B  91      12.301  31.386  31.925  1.00 19.36           N  
ATOM   1842  CA  VAL B  91      11.410  31.949  32.940  1.00 22.25           C  
ATOM   1843  C   VAL B  91      12.044  33.258  33.341  1.00 22.92           C  
ATOM   1844  O   VAL B  91      13.255  33.405  33.562  1.00 27.61           O  
ATOM   1845  CB  VAL B  91      11.182  31.160  34.265  1.00 19.48           C  
ATOM   1846  CG1 VAL B  91      10.957  29.743  33.792  1.00 26.22           C  
ATOM   1847  CG2 VAL B  91      12.261  31.259  35.299  1.00 20.75           C  
ATOM   1848  N   ASN B  92      11.141  34.214  33.314  1.00 20.23           N  
ATOM   1849  CA  ASN B  92      11.445  35.568  33.671  1.00 16.91           C  
ATOM   1850  C   ASN B  92      11.824  35.668  35.134  1.00 15.73           C  
ATOM   1851  O   ASN B  92      11.081  35.296  36.051  1.00 14.31           O  
ATOM   1852  CB  ASN B  92      10.246  36.461  33.407  1.00 15.62           C  
ATOM   1853  CG  ASN B  92      10.223  36.968  31.989  1.00 15.92           C  
ATOM   1854  OD1 ASN B  92      10.783  38.026  31.713  1.00 18.53           O  
ATOM   1855  ND2 ASN B  92       9.609  36.299  31.028  1.00 12.88           N  
ATOM   1856  N   LEU B  93      13.067  36.069  35.324  1.00 13.65           N  
ATOM   1857  CA  LEU B  93      13.574  36.335  36.658  1.00 12.64           C  
ATOM   1858  C   LEU B  93      13.403  37.821  37.036  1.00 11.88           C  
ATOM   1859  O   LEU B  93      13.000  38.129  38.143  1.00 10.35           O  
ATOM   1860  CB  LEU B  93      15.089  35.941  36.745  1.00  9.50           C  
ATOM   1861  CG  LEU B  93      15.596  34.518  36.546  1.00  6.43           C  
ATOM   1862  CD1 LEU B  93      16.964  34.468  37.134  1.00  7.20           C  
ATOM   1863  CD2 LEU B  93      14.742  33.477  37.247  1.00  5.00           C  
ATOM   1864  N   LEU B  94      13.604  38.756  36.110  1.00 10.90           N  
ATOM   1865  CA  LEU B  94      13.712  40.176  36.358  1.00  9.82           C  
ATOM   1866  C   LEU B  94      13.230  40.933  35.116  1.00 11.49           C  
ATOM   1867  O   LEU B  94      13.501  40.524  33.982  1.00 12.21           O  
ATOM   1868  CB  LEU B  94      15.173  40.591  36.634  1.00  8.84           C  
ATOM   1869  CG  LEU B  94      16.040  40.150  37.804  1.00 12.82           C  
ATOM   1870  CD1 LEU B  94      17.323  40.932  37.689  1.00 12.55           C  
ATOM   1871  CD2 LEU B  94      15.399  40.419  39.160  1.00 11.94           C  
ATOM   1872  N   SER B  95      12.661  42.117  35.232  1.00  9.82           N  
ATOM   1873  CA  SER B  95      12.009  42.731  34.111  1.00  9.16           C  
ATOM   1874  C   SER B  95      11.741  44.179  34.463  1.00  7.79           C  
ATOM   1875  O   SER B  95      11.406  44.520  35.582  1.00  7.61           O  
ATOM   1876  CB  SER B  95      10.626  42.125  33.816  1.00 10.97           C  
ATOM   1877  OG  SER B  95      10.391  40.731  33.925  1.00 15.19           O  
ATOM   1878  N   ALA B  96      11.881  45.040  33.490  1.00  3.91           N  
ATOM   1879  CA  ALA B  96      11.426  46.350  33.642  1.00  2.00           C  
ATOM   1880  C   ALA B  96      11.002  46.807  32.266  1.00  5.97           C  
ATOM   1881  O   ALA B  96      11.340  46.191  31.245  1.00  7.84           O  
ATOM   1882  CB  ALA B  96      12.503  47.177  34.154  1.00  3.64           C  
ATOM   1883  N   ILE B  97      10.181  47.877  32.311  1.00  7.48           N  
ATOM   1884  CA  ILE B  97       9.519  48.481  31.178  1.00  7.46           C  
ATOM   1885  C   ILE B  97       9.535  49.999  31.286  1.00  7.29           C  
ATOM   1886  O   ILE B  97       8.851  50.445  32.195  1.00  8.37           O  
ATOM   1887  CB  ILE B  97       8.045  48.039  31.119  1.00  6.26           C  
ATOM   1888  CG1 ILE B  97       7.824  46.591  31.404  1.00  4.37           C  
ATOM   1889  CG2 ILE B  97       7.590  48.351  29.690  1.00 12.33           C  
ATOM   1890  CD1 ILE B  97       6.363  46.222  31.565  1.00 10.24           C  
ATOM   1891  N   LYS B  98      10.215  50.854  30.529  1.00  7.57           N  
ATOM   1892  CA  LYS B  98       9.993  52.297  30.636  1.00  8.22           C  
ATOM   1893  C   LYS B  98       9.295  52.796  29.359  1.00  9.92           C  
ATOM   1894  O   LYS B  98       9.568  52.303  28.262  1.00  7.84           O  
ATOM   1895  CB  LYS B  98      11.231  53.180  30.697  1.00  9.49           C  
ATOM   1896  CG  LYS B  98      12.118  52.989  31.868  1.00 13.18           C  
ATOM   1897  CD  LYS B  98      12.820  54.296  32.208  1.00 12.95           C  
ATOM   1898  CE  LYS B  98      13.787  54.095  33.317  1.00 12.85           C  
ATOM   1899  NZ  LYS B  98      14.568  55.287  33.568  1.00 15.42           N  
ATOM   1900  N   SER B  99       8.392  53.758  29.398  1.00  9.12           N  
ATOM   1901  CA  SER B  99       7.950  54.364  28.188  1.00 11.57           C  
ATOM   1902  C   SER B  99       8.524  55.788  28.153  1.00 14.16           C  
ATOM   1903  O   SER B  99       8.199  56.601  29.008  1.00 15.43           O  
ATOM   1904  CB  SER B  99       6.427  54.297  28.188  1.00 14.12           C  
ATOM   1905  OG  SER B  99       5.827  54.696  29.402  1.00 16.55           O  
ATOM   1906  N   PRO B 100       9.419  56.150  27.224  1.00 15.31           N  
ATOM   1907  CA  PRO B 100      10.092  57.433  27.184  1.00 19.25           C  
ATOM   1908  C   PRO B 100       9.304  58.610  26.631  1.00 23.68           C  
ATOM   1909  O   PRO B 100       9.575  59.767  26.994  1.00 27.11           O  
ATOM   1910  CB  PRO B 100      11.344  57.170  26.372  1.00 18.56           C  
ATOM   1911  CG  PRO B 100      10.862  56.158  25.383  1.00 16.01           C  
ATOM   1912  CD  PRO B 100      10.115  55.238  26.327  1.00 15.62           C  
ATOM   1913  N   CYS B 101       8.402  58.302  25.680  1.00 26.61           N  
ATOM   1914  CA  CYS B 101       7.596  59.319  24.978  1.00 26.40           C  
ATOM   1915  C   CYS B 101       6.177  59.318  25.498  1.00 27.50           C  
ATOM   1916  O   CYS B 101       5.568  58.267  25.352  1.00 27.80           O  
ATOM   1917  CB  CYS B 101       7.488  59.045  23.449  1.00 24.48           C  
ATOM   1918  SG  CYS B 101       9.017  58.966  22.509  1.00 18.64           S  
ATOM   1919  N   GLN B 102       5.543  60.288  26.122  1.00 34.30           N  
ATOM   1920  CA  GLN B 102       4.114  60.190  26.421  1.00 43.38           C  
ATOM   1921  C   GLN B 102       3.678  61.522  25.885  1.00 47.62           C  
ATOM   1922  O   GLN B 102       3.825  62.577  26.512  1.00 48.31           O  
ATOM   1923  CB  GLN B 102       3.824  60.121  27.903  1.00 46.73           C  
ATOM   1924  CG  GLN B 102       3.746  58.732  28.526  1.00 47.91           C  
ATOM   1925  CD  GLN B 102       3.910  58.963  30.013  1.00 50.31           C  
ATOM   1926  OE1 GLN B 102       2.960  59.336  30.707  1.00 49.56           O  
ATOM   1927  NE2 GLN B 102       5.121  58.767  30.550  1.00 51.38           N  
ATOM   1928  N   ARG B 103       3.307  61.343  24.603  1.00 52.92           N  
ATOM   1929  CA  ARG B 103       3.090  62.428  23.636  1.00 56.65           C  
ATOM   1930  C   ARG B 103       4.415  63.219  23.426  1.00 58.23           C  
ATOM   1931  O   ARG B 103       5.412  62.965  24.113  1.00 61.27           O  
ATOM   1932  CB  ARG B 103       1.928  63.294  24.171  1.00 57.05           C  
ATOM   1933  CG  ARG B 103       1.801  64.746  23.682  1.00 58.89           C  
ATOM   1934  CD  ARG B 103       1.673  64.937  22.161  1.00 56.61           C  
ATOM   1935  NE  ARG B 103       1.163  66.271  21.927  1.00 55.14           N  
ATOM   1936  CZ  ARG B 103      -0.164  66.470  21.840  1.00 55.10           C  
ATOM   1937  NH1 ARG B 103      -0.646  67.711  21.707  1.00 54.90           N  
ATOM   1938  NH2 ARG B 103      -1.033  65.450  21.855  1.00 55.14           N  
ATOM   1939  N   GLU B 104       4.540  64.023  22.370  1.00 60.55           N  
ATOM   1940  CA  GLU B 104       5.627  64.976  22.072  1.00 62.45           C  
ATOM   1941  C   GLU B 104       5.549  65.036  20.542  1.00 63.35           C  
ATOM   1942  O   GLU B 104       5.566  66.140  19.976  1.00 65.04           O  
ATOM   1943  CB  GLU B 104       7.087  64.524  22.412  1.00 63.55           C  
ATOM   1944  CG  GLU B 104       7.877  65.380  23.423  1.00 63.90           C  
ATOM   1945  CD  GLU B 104       8.588  66.657  22.919  1.00 63.44           C  
ATOM   1946  OE1 GLU B 104       7.933  67.704  22.770  1.00 62.55           O  
ATOM   1947  OE2 GLU B 104       9.808  66.596  22.701  1.00 61.79           O  
ATOM   1948  N   THR B 105       5.541  63.872  19.851  1.00 60.16           N  
ATOM   1949  CA  THR B 105       5.245  63.798  18.418  1.00 59.63           C  
ATOM   1950  C   THR B 105       5.886  64.878  17.492  1.00 58.44           C  
ATOM   1951  O   THR B 105       5.269  65.392  16.530  1.00 55.72           O  
ATOM   1952  CB  THR B 105       3.676  63.811  18.277  1.00 60.40           C  
ATOM   1953  OG1 THR B 105       3.054  63.577  19.560  1.00 60.68           O  
ATOM   1954  CG2 THR B 105       3.240  62.762  17.230  1.00 61.57           C  
ATOM   1955  N   PRO B 106       7.124  65.299  17.785  1.00 56.88           N  
ATOM   1956  CA  PRO B 106       7.519  66.702  17.604  1.00 56.95           C  
ATOM   1957  C   PRO B 106       7.610  67.257  16.157  1.00 55.91           C  
ATOM   1958  O   PRO B 106       8.672  67.339  15.515  1.00 55.11           O  
ATOM   1959  CB  PRO B 106       8.795  66.713  18.426  1.00 55.84           C  
ATOM   1960  CG  PRO B 106       8.696  65.523  19.379  1.00 53.87           C  
ATOM   1961  CD  PRO B 106       8.164  64.503  18.430  1.00 54.89           C  
ATOM   1962  N   GLU B 107       6.415  67.734  15.747  1.00 54.92           N  
ATOM   1963  CA  GLU B 107       6.048  68.185  14.390  1.00 52.56           C  
ATOM   1964  C   GLU B 107       6.822  69.276  13.665  1.00 48.18           C  
ATOM   1965  O   GLU B 107       7.464  69.036  12.646  1.00 45.24           O  
ATOM   1966  CB  GLU B 107       4.551  68.572  14.432  1.00 52.75           C  
ATOM   1967  CG  GLU B 107       3.936  68.611  13.036  1.00 53.95           C  
ATOM   1968  CD  GLU B 107       3.594  70.031  12.598  1.00 55.26           C  
ATOM   1969  OE1 GLU B 107       2.431  70.423  12.767  1.00 56.07           O  
ATOM   1970  OE2 GLU B 107       4.487  70.729  12.095  1.00 54.38           O  
ATOM   1971  N   GLY B 108       6.685  70.517  14.113  1.00 45.86           N  
ATOM   1972  CA  GLY B 108       7.472  71.626  13.594  1.00 43.18           C  
ATOM   1973  C   GLY B 108       8.731  71.730  14.451  1.00 41.05           C  
ATOM   1974  O   GLY B 108       9.051  72.793  15.003  1.00 35.54           O  
ATOM   1975  N   ALA B 109       9.435  70.595  14.519  1.00 39.33           N  
ATOM   1976  CA  ALA B 109      10.532  70.528  15.438  1.00 46.50           C  
ATOM   1977  C   ALA B 109      11.746  69.657  15.109  1.00 49.36           C  
ATOM   1978  O   ALA B 109      12.902  70.096  15.297  1.00 49.42           O  
ATOM   1979  CB  ALA B 109      10.002  70.068  16.798  1.00 47.26           C  
ATOM   1980  N   GLU B 110      11.495  68.397  14.703  1.00 49.46           N  
ATOM   1981  CA  GLU B 110      12.529  67.371  14.491  1.00 49.10           C  
ATOM   1982  C   GLU B 110      13.050  66.892  15.870  1.00 46.16           C  
ATOM   1983  O   GLU B 110      13.539  65.766  15.974  1.00 46.84           O  
ATOM   1984  CB  GLU B 110      13.719  67.901  13.606  1.00 49.89           C  
ATOM   1985  CG  GLU B 110      13.771  67.431  12.146  1.00 47.87           C  
ATOM   1986  CD  GLU B 110      14.994  66.539  11.868  1.00 48.31           C  
ATOM   1987  OE1 GLU B 110      15.041  65.402  12.376  1.00 48.20           O  
ATOM   1988  OE2 GLU B 110      15.903  66.985  11.150  1.00 44.88           O  
ATOM   1989  N   ALA B 111      12.996  67.708  16.934  1.00 41.81           N  
ATOM   1990  CA  ALA B 111      13.093  67.220  18.300  1.00 41.45           C  
ATOM   1991  C   ALA B 111      14.333  66.715  19.032  1.00 41.01           C  
ATOM   1992  O   ALA B 111      15.386  66.255  18.539  1.00 42.83           O  
ATOM   1993  CB  ALA B 111      12.076  66.120  18.517  1.00 42.78           C  
ATOM   1994  N   LYS B 112      14.067  66.783  20.340  1.00 36.49           N  
ATOM   1995  CA  LYS B 112      15.112  66.517  21.299  1.00 30.61           C  
ATOM   1996  C   LYS B 112      15.287  65.029  21.534  1.00 26.09           C  
ATOM   1997  O   LYS B 112      14.335  64.240  21.434  1.00 25.22           O  
ATOM   1998  CB  LYS B 112      14.791  67.233  22.599  1.00 28.91           C  
ATOM   1999  CG  LYS B 112      14.930  68.741  22.547  1.00 28.86           C  
ATOM   2000  CD  LYS B 112      13.612  69.342  22.043  1.00 30.29           C  
ATOM   2001  CE  LYS B 112      13.711  70.823  21.747  1.00 26.33           C  
ATOM   2002  NZ  LYS B 112      14.695  71.039  20.710  1.00 26.59           N  
ATOM   2003  N   PRO B 113      16.539  64.645  21.805  1.00 22.87           N  
ATOM   2004  CA  PRO B 113      16.866  63.310  22.276  1.00 21.61           C  
ATOM   2005  C   PRO B 113      16.666  62.986  23.791  1.00 20.84           C  
ATOM   2006  O   PRO B 113      17.031  63.742  24.711  1.00 19.02           O  
ATOM   2007  CB  PRO B 113      18.270  63.214  21.725  1.00 20.27           C  
ATOM   2008  CG  PRO B 113      18.884  64.573  21.944  1.00 17.65           C  
ATOM   2009  CD  PRO B 113      17.740  65.446  21.524  1.00 21.12           C  
ATOM   2010  N   TRP B 114      16.000  61.875  24.095  1.00 17.43           N  
ATOM   2011  CA  TRP B 114      15.829  61.412  25.460  1.00 14.88           C  
ATOM   2012  C   TRP B 114      16.830  60.300  25.728  1.00 16.49           C  
ATOM   2013  O   TRP B 114      17.476  59.784  24.816  1.00 18.10           O  
ATOM   2014  CB  TRP B 114      14.438  60.884  25.683  1.00 12.20           C  
ATOM   2015  CG  TRP B 114      13.891  60.016  24.554  1.00 11.89           C  
ATOM   2016  CD1 TRP B 114      13.150  60.523  23.504  1.00  8.99           C  
ATOM   2017  CD2 TRP B 114      14.089  58.671  24.461  1.00 10.90           C  
ATOM   2018  NE1 TRP B 114      12.890  59.498  22.761  1.00  7.31           N  
ATOM   2019  CE2 TRP B 114      13.427  58.376  23.283  1.00 10.15           C  
ATOM   2020  CE3 TRP B 114      14.738  57.702  25.196  1.00 11.00           C  
ATOM   2021  CZ2 TRP B 114      13.393  57.073  22.828  1.00  6.60           C  
ATOM   2022  CZ3 TRP B 114      14.695  56.423  24.721  1.00 10.76           C  
ATOM   2023  CH2 TRP B 114      14.034  56.122  23.551  1.00  6.40           C  
ATOM   2024  N   TYR B 115      17.050  59.943  26.973  1.00 16.22           N  
ATOM   2025  CA  TYR B 115      17.880  58.811  27.314  1.00 14.86           C  
ATOM   2026  C   TYR B 115      17.073  58.134  28.392  1.00 13.37           C  
ATOM   2027  O   TYR B 115      16.387  58.824  29.162  1.00 14.56           O  
ATOM   2028  CB  TYR B 115      19.164  59.207  27.895  1.00 14.11           C  
ATOM   2029  CG  TYR B 115      20.077  59.767  26.860  1.00 17.66           C  
ATOM   2030  CD1 TYR B 115      19.995  61.126  26.571  1.00 21.75           C  
ATOM   2031  CD2 TYR B 115      21.052  58.975  26.299  1.00 17.89           C  
ATOM   2032  CE1 TYR B 115      20.899  61.737  25.724  1.00 22.07           C  
ATOM   2033  CE2 TYR B 115      21.971  59.595  25.451  1.00 23.26           C  
ATOM   2034  CZ  TYR B 115      21.900  60.973  25.164  1.00 23.55           C  
ATOM   2035  OH  TYR B 115      22.859  61.593  24.354  1.00 24.75           O  
ATOM   2036  N   GLU B 116      17.172  56.819  28.494  1.00 11.19           N  
ATOM   2037  CA  GLU B 116      16.318  56.059  29.364  1.00  9.21           C  
ATOM   2038  C   GLU B 116      17.149  54.917  29.837  1.00  9.79           C  
ATOM   2039  O   GLU B 116      17.407  54.092  28.949  1.00 15.15           O  
ATOM   2040  CB  GLU B 116      15.156  55.616  28.524  1.00 10.20           C  
ATOM   2041  CG  GLU B 116      13.860  55.682  29.218  1.00 17.12           C  
ATOM   2042  CD  GLU B 116      13.552  57.042  29.810  1.00 22.09           C  
ATOM   2043  OE1 GLU B 116      12.876  57.861  29.171  1.00 22.30           O  
ATOM   2044  OE2 GLU B 116      13.948  57.255  30.955  1.00 29.25           O  
ATOM   2045  N   PRO B 117      17.707  54.795  31.057  1.00 11.50           N  
ATOM   2046  CA  PRO B 117      18.430  53.574  31.426  1.00 10.73           C  
ATOM   2047  C   PRO B 117      17.583  52.573  32.159  1.00  7.76           C  
ATOM   2048  O   PRO B 117      16.577  53.009  32.696  1.00  7.89           O  
ATOM   2049  CB  PRO B 117      19.611  54.041  32.247  1.00  7.14           C  
ATOM   2050  CG  PRO B 117      19.068  55.218  32.939  1.00  8.27           C  
ATOM   2051  CD  PRO B 117      18.306  55.885  31.815  1.00 11.07           C  
ATOM   2052  N   ILE B 118      17.905  51.278  32.180  1.00  7.65           N  
ATOM   2053  CA  ILE B 118      17.201  50.331  33.048  1.00  9.62           C  
ATOM   2054  C   ILE B 118      18.147  49.294  33.650  1.00 13.84           C  
ATOM   2055  O   ILE B 118      18.845  48.507  32.958  1.00 17.24           O  
ATOM   2056  CB  ILE B 118      16.062  49.562  32.289  1.00 10.03           C  
ATOM   2057  CG1 ILE B 118      14.987  50.500  31.756  1.00  7.09           C  
ATOM   2058  CG2 ILE B 118      15.376  48.622  33.258  1.00  6.05           C  
ATOM   2059  CD1 ILE B 118      14.177  49.851  30.652  1.00  7.57           C  
ATOM   2060  N   TYR B 119      18.068  49.291  34.988  1.00 14.43           N  
ATOM   2061  CA  TYR B 119      18.871  48.408  35.814  1.00 12.71           C  
ATOM   2062  C   TYR B 119      17.992  47.311  36.412  1.00 12.55           C  
ATOM   2063  O   TYR B 119      16.858  47.479  36.862  1.00 15.46           O  
ATOM   2064  CB  TYR B 119      19.534  49.197  36.914  1.00  8.30           C  
ATOM   2065  CG  TYR B 119      20.662  48.418  37.552  1.00  6.16           C  
ATOM   2066  CD1 TYR B 119      21.972  48.735  37.247  1.00 10.45           C  
ATOM   2067  CD2 TYR B 119      20.389  47.409  38.425  1.00  6.33           C  
ATOM   2068  CE1 TYR B 119      23.029  48.047  37.806  1.00 10.02           C  
ATOM   2069  CE2 TYR B 119      21.425  46.711  38.978  1.00 10.66           C  
ATOM   2070  CZ  TYR B 119      22.736  47.021  38.675  1.00 10.74           C  
ATOM   2071  OH  TYR B 119      23.741  46.274  39.241  1.00 10.24           O  
ATOM   2072  N   LEU B 120      18.617  46.155  36.431  1.00 15.55           N  
ATOM   2073  CA  LEU B 120      18.058  44.915  36.914  1.00 14.59           C  
ATOM   2074  C   LEU B 120      19.099  44.221  37.825  1.00 17.03           C  
ATOM   2075  O   LEU B 120      20.248  44.013  37.407  1.00 19.56           O  
ATOM   2076  CB  LEU B 120      17.727  44.164  35.647  1.00 12.08           C  
ATOM   2077  CG  LEU B 120      16.301  43.782  35.304  1.00 15.33           C  
ATOM   2078  CD1 LEU B 120      15.261  44.861  35.437  1.00 13.71           C  
ATOM   2079  CD2 LEU B 120      16.413  43.358  33.845  1.00 18.63           C  
ATOM   2080  N   GLY B 121      18.823  43.903  39.095  1.00 14.18           N  
ATOM   2081  CA  GLY B 121      19.779  43.177  39.883  1.00  8.52           C  
ATOM   2082  C   GLY B 121      18.992  42.388  40.903  1.00 12.37           C  
ATOM   2083  O   GLY B 121      18.123  42.976  41.580  1.00 11.25           O  
ATOM   2084  N   GLY B 122      19.282  41.084  41.023  1.00 12.56           N  
ATOM   2085  CA  GLY B 122      18.666  40.218  42.034  1.00 15.56           C  
ATOM   2086  C   GLY B 122      19.530  39.013  42.449  1.00 16.87           C  
ATOM   2087  O   GLY B 122      20.578  38.722  41.848  1.00 18.25           O  
ATOM   2088  N   VAL B 123      19.147  38.314  43.514  1.00 13.82           N  
ATOM   2089  CA  VAL B 123      19.870  37.116  43.921  1.00 16.60           C  
ATOM   2090  C   VAL B 123      18.929  35.984  43.576  1.00 14.51           C  
ATOM   2091  O   VAL B 123      17.706  36.080  43.759  1.00 18.46           O  
ATOM   2092  CB  VAL B 123      20.213  37.049  45.455  1.00 18.43           C  
ATOM   2093  CG1 VAL B 123      20.884  35.699  45.787  1.00 19.83           C  
ATOM   2094  CG2 VAL B 123      21.238  38.132  45.824  1.00 18.49           C  
ATOM   2095  N   PHE B 124      19.497  34.997  42.902  1.00 13.42           N  
ATOM   2096  CA  PHE B 124      18.755  33.829  42.499  1.00 14.73           C  
ATOM   2097  C   PHE B 124      19.633  32.589  42.543  1.00 15.64           C  
ATOM   2098  O   PHE B 124      20.861  32.586  42.368  1.00 11.74           O  
ATOM   2099  CB  PHE B 124      18.212  33.988  41.078  1.00 16.41           C  
ATOM   2100  CG  PHE B 124      17.298  35.192  40.827  1.00 14.01           C  
ATOM   2101  CD1 PHE B 124      17.841  36.438  40.648  1.00 10.64           C  
ATOM   2102  CD2 PHE B 124      15.950  35.015  40.846  1.00 12.69           C  
ATOM   2103  CE1 PHE B 124      17.004  37.503  40.516  1.00 13.27           C  
ATOM   2104  CE2 PHE B 124      15.122  36.094  40.713  1.00 13.50           C  
ATOM   2105  CZ  PHE B 124      15.651  37.337  40.548  1.00 12.59           C  
ATOM   2106  N   GLN B 125      18.936  31.512  42.886  1.00 16.38           N  
ATOM   2107  CA  GLN B 125      19.529  30.183  42.913  1.00 19.75           C  
ATOM   2108  C   GLN B 125      19.462  29.557  41.523  1.00 18.89           C  
ATOM   2109  O   GLN B 125      18.368  29.254  41.052  1.00 21.59           O  
ATOM   2110  CB  GLN B 125      18.795  29.244  43.887  1.00 20.64           C  
ATOM   2111  CG  GLN B 125      19.558  27.916  43.965  1.00 20.79           C  
ATOM   2112  CD  GLN B 125      19.005  26.838  44.864  1.00 20.39           C  
ATOM   2113  OE1 GLN B 125      18.187  27.063  45.760  1.00 19.95           O  
ATOM   2114  NE2 GLN B 125      19.461  25.610  44.662  1.00 23.22           N  
ATOM   2115  N   LEU B 126      20.589  29.416  40.839  1.00 17.66           N  
ATOM   2116  CA  LEU B 126      20.605  28.683  39.597  1.00 19.32           C  
ATOM   2117  C   LEU B 126      20.912  27.206  39.872  1.00 21.36           C  
ATOM   2118  O   LEU B 126      21.011  26.749  41.009  1.00 26.63           O  
ATOM   2119  CB  LEU B 126      21.675  29.258  38.646  1.00 16.78           C  
ATOM   2120  CG  LEU B 126      21.451  30.503  37.815  1.00 15.05           C  
ATOM   2121  CD1 LEU B 126      19.944  30.622  37.537  1.00 16.44           C  
ATOM   2122  CD2 LEU B 126      21.959  31.734  38.528  1.00 10.54           C  
ATOM   2123  N   GLU B 127      21.072  26.398  38.843  1.00 25.44           N  
ATOM   2124  CA  GLU B 127      21.536  25.017  38.926  1.00 26.98           C  
ATOM   2125  C   GLU B 127      22.555  24.850  37.775  1.00 25.78           C  
ATOM   2126  O   GLU B 127      22.582  25.653  36.825  1.00 26.97           O  
ATOM   2127  CB  GLU B 127      20.353  24.066  38.789  1.00 26.77           C  
ATOM   2128  CG  GLU B 127      19.973  23.632  40.204  1.00 29.81           C  
ATOM   2129  CD  GLU B 127      18.500  23.888  40.548  1.00 35.09           C  
ATOM   2130  OE1 GLU B 127      18.229  24.698  41.455  1.00 36.59           O  
ATOM   2131  OE2 GLU B 127      17.624  23.272  39.908  1.00 35.18           O  
ATOM   2132  N   LYS B 128      23.445  23.862  37.837  1.00 24.72           N  
ATOM   2133  CA  LYS B 128      24.530  23.675  36.854  1.00 25.57           C  
ATOM   2134  C   LYS B 128      24.040  23.453  35.439  1.00 26.39           C  
ATOM   2135  O   LYS B 128      23.105  22.677  35.193  1.00 31.15           O  
ATOM   2136  CB  LYS B 128      25.391  22.483  37.277  1.00 24.31           C  
ATOM   2137  CG  LYS B 128      26.445  21.990  36.334  1.00 20.47           C  
ATOM   2138  CD  LYS B 128      27.401  21.095  37.077  1.00 18.14           C  
ATOM   2139  CE  LYS B 128      28.554  20.813  36.151  1.00 19.87           C  
ATOM   2140  NZ  LYS B 128      29.710  20.297  36.848  1.00 23.88           N  
ATOM   2141  N   GLY B 129      24.652  24.165  34.521  1.00 25.54           N  
ATOM   2142  CA  GLY B 129      24.301  24.017  33.124  1.00 26.65           C  
ATOM   2143  C   GLY B 129      23.251  25.031  32.678  1.00 28.06           C  
ATOM   2144  O   GLY B 129      23.005  25.121  31.474  1.00 28.86           O  
ATOM   2145  N   ASP B 130      22.645  25.792  33.612  1.00 27.10           N  
ATOM   2146  CA  ASP B 130      21.741  26.871  33.251  1.00 25.89           C  
ATOM   2147  C   ASP B 130      22.330  27.910  32.297  1.00 24.94           C  
ATOM   2148  O   ASP B 130      23.534  28.011  32.084  1.00 21.85           O  
ATOM   2149  CB  ASP B 130      21.296  27.620  34.475  1.00 27.75           C  
ATOM   2150  CG  ASP B 130      20.258  26.912  35.342  1.00 33.21           C  
ATOM   2151  OD1 ASP B 130      19.698  25.890  34.924  1.00 34.86           O  
ATOM   2152  OD2 ASP B 130      20.005  27.410  36.449  1.00 31.87           O  
ATOM   2153  N   ARG B 131      21.435  28.697  31.724  1.00 26.99           N  
ATOM   2154  CA  ARG B 131      21.697  29.797  30.817  1.00 22.47           C  
ATOM   2155  C   ARG B 131      20.814  30.983  31.322  1.00 23.31           C  
ATOM   2156  O   ARG B 131      19.757  30.903  31.967  1.00 20.53           O  
ATOM   2157  CB  ARG B 131      21.347  29.377  29.373  1.00 21.16           C  
ATOM   2158  CG  ARG B 131      22.208  28.300  28.701  1.00 19.65           C  
ATOM   2159  CD  ARG B 131      21.640  28.160  27.281  1.00 24.57           C  
ATOM   2160  NE  ARG B 131      22.224  27.191  26.347  1.00 28.12           N  
ATOM   2161  CZ  ARG B 131      22.803  27.546  25.161  1.00 31.35           C  
ATOM   2162  NH1 ARG B 131      23.312  26.606  24.375  1.00 31.02           N  
ATOM   2163  NH2 ARG B 131      22.950  28.802  24.709  1.00 29.54           N  
ATOM   2164  N   LEU B 132      21.343  32.177  31.103  1.00 21.54           N  
ATOM   2165  CA  LEU B 132      20.799  33.416  31.597  1.00 17.92           C  
ATOM   2166  C   LEU B 132      20.856  34.334  30.397  1.00 17.67           C  
ATOM   2167  O   LEU B 132      21.912  34.381  29.759  1.00 13.87           O  
ATOM   2168  CB  LEU B 132      21.706  33.900  32.718  1.00 19.62           C  
ATOM   2169  CG  LEU B 132      22.002  32.934  33.864  1.00 18.60           C  
ATOM   2170  CD1 LEU B 132      23.323  33.259  34.545  1.00 19.18           C  
ATOM   2171  CD2 LEU B 132      20.801  32.967  34.753  1.00 19.26           C  
ATOM   2172  N   SER B 133      19.806  35.074  30.046  1.00 17.35           N  
ATOM   2173  CA  SER B 133      19.864  35.956  28.899  1.00 17.02           C  
ATOM   2174  C   SER B 133      19.259  37.308  29.230  1.00 16.20           C  
ATOM   2175  O   SER B 133      18.255  37.329  29.911  1.00 17.48           O  
ATOM   2176  CB  SER B 133      19.123  35.320  27.721  1.00 16.57           C  
ATOM   2177  OG  SER B 133      17.777  34.936  27.997  1.00 22.42           O  
ATOM   2178  N   ALA B 134      19.929  38.406  28.856  1.00 20.76           N  
ATOM   2179  CA  ALA B 134      19.495  39.810  28.968  1.00 21.73           C  
ATOM   2180  C   ALA B 134      18.838  40.244  27.623  1.00 20.50           C  
ATOM   2181  O   ALA B 134      19.556  40.397  26.638  1.00 21.38           O  
ATOM   2182  CB  ALA B 134      20.727  40.666  29.259  1.00 19.67           C  
ATOM   2183  N   GLU B 135      17.529  40.420  27.450  1.00 17.04           N  
ATOM   2184  CA  GLU B 135      16.922  40.687  26.141  1.00 18.01           C  
ATOM   2185  C   GLU B 135      16.128  41.982  26.241  1.00 14.40           C  
ATOM   2186  O   GLU B 135      15.308  42.209  27.124  1.00 14.32           O  
ATOM   2187  CB  GLU B 135      15.933  39.521  25.661  1.00 15.79           C  
ATOM   2188  CG  GLU B 135      16.475  38.081  25.766  1.00 15.33           C  
ATOM   2189  CD  GLU B 135      15.513  36.859  25.708  1.00 20.82           C  
ATOM   2190  OE1 GLU B 135      16.055  35.769  25.600  1.00 22.19           O  
ATOM   2191  OE2 GLU B 135      14.271  36.922  25.792  1.00 20.63           O  
ATOM   2192  N   ILE B 136      16.458  42.923  25.396  1.00 15.46           N  
ATOM   2193  CA  ILE B 136      15.648  44.137  25.299  1.00 18.00           C  
ATOM   2194  C   ILE B 136      14.635  43.950  24.158  1.00 19.89           C  
ATOM   2195  O   ILE B 136      14.807  43.026  23.346  1.00 20.61           O  
ATOM   2196  CB  ILE B 136      16.491  45.372  24.992  1.00 14.94           C  
ATOM   2197  CG1 ILE B 136      17.288  45.128  23.712  1.00 11.13           C  
ATOM   2198  CG2 ILE B 136      17.240  45.737  26.249  1.00 15.17           C  
ATOM   2199  CD1 ILE B 136      18.338  46.140  23.325  1.00  9.74           C  
ATOM   2200  N   ASN B 137      13.598  44.788  24.010  1.00 16.57           N  
ATOM   2201  CA  ASN B 137      12.669  44.514  22.933  1.00 13.57           C  
ATOM   2202  C   ASN B 137      13.013  45.371  21.757  1.00 11.22           C  
ATOM   2203  O   ASN B 137      12.482  45.087  20.693  1.00 14.39           O  
ATOM   2204  CB  ASN B 137      11.195  44.755  23.368  1.00 14.66           C  
ATOM   2205  CG  ASN B 137      10.765  46.194  23.602  1.00 13.36           C  
ATOM   2206  OD1 ASN B 137      11.493  46.998  24.185  1.00 15.05           O  
ATOM   2207  ND2 ASN B 137       9.588  46.539  23.125  1.00 11.19           N  
ATOM   2208  N   ARG B 138      13.892  46.364  21.910  1.00  7.82           N  
ATOM   2209  CA  ARG B 138      14.286  47.252  20.861  1.00  3.41           C  
ATOM   2210  C   ARG B 138      15.774  47.532  20.820  1.00  8.00           C  
ATOM   2211  O   ARG B 138      16.278  48.504  21.378  1.00 10.36           O  
ATOM   2212  CB  ARG B 138      13.569  48.542  21.007  1.00  8.44           C  
ATOM   2213  CG  ARG B 138      12.048  48.508  20.967  1.00 11.02           C  
ATOM   2214  CD  ARG B 138      11.480  48.310  19.557  1.00 16.26           C  
ATOM   2215  NE  ARG B 138      11.824  49.335  18.561  1.00 14.12           N  
ATOM   2216  CZ  ARG B 138      11.270  50.546  18.458  1.00 15.22           C  
ATOM   2217  NH1 ARG B 138      11.726  51.293  17.488  1.00 17.90           N  
ATOM   2218  NH2 ARG B 138      10.288  51.031  19.219  1.00 14.51           N  
ATOM   2219  N   PRO B 139      16.594  46.736  20.139  1.00 10.12           N  
ATOM   2220  CA  PRO B 139      18.022  46.985  20.018  1.00 13.84           C  
ATOM   2221  C   PRO B 139      18.333  48.198  19.163  1.00 19.02           C  
ATOM   2222  O   PRO B 139      19.377  48.826  19.343  1.00 22.06           O  
ATOM   2223  CB  PRO B 139      18.593  45.713  19.463  1.00 12.74           C  
ATOM   2224  CG  PRO B 139      17.454  45.275  18.593  1.00 14.74           C  
ATOM   2225  CD  PRO B 139      16.245  45.477  19.510  1.00 10.02           C  
ATOM   2226  N   ASP B 140      17.385  48.579  18.282  1.00 18.46           N  
ATOM   2227  CA  ASP B 140      17.524  49.738  17.431  1.00 14.92           C  
ATOM   2228  C   ASP B 140      17.625  51.009  18.199  1.00 13.63           C  
ATOM   2229  O   ASP B 140      17.896  51.995  17.538  1.00 20.32           O  
ATOM   2230  CB  ASP B 140      16.338  49.871  16.449  1.00 12.25           C  
ATOM   2231  CG  ASP B 140      14.921  50.097  16.985  1.00 11.72           C  
ATOM   2232  OD1 ASP B 140      14.372  51.185  16.818  1.00  7.66           O  
ATOM   2233  OD2 ASP B 140      14.365  49.155  17.538  1.00 13.30           O  
ATOM   2234  N   TYR B 141      17.319  51.004  19.501  1.00 16.36           N  
ATOM   2235  CA  TYR B 141      17.391  52.178  20.378  1.00 17.57           C  
ATOM   2236  C   TYR B 141      18.556  52.251  21.380  1.00 19.48           C  
ATOM   2237  O   TYR B 141      18.630  53.244  22.118  1.00 22.36           O  
ATOM   2238  CB  TYR B 141      16.139  52.332  21.214  1.00 16.73           C  
ATOM   2239  CG  TYR B 141      14.972  53.029  20.563  1.00 16.34           C  
ATOM   2240  CD1 TYR B 141      13.716  52.484  20.732  1.00 15.94           C  
ATOM   2241  CD2 TYR B 141      15.162  54.185  19.825  1.00 18.51           C  
ATOM   2242  CE1 TYR B 141      12.636  53.101  20.149  1.00 18.49           C  
ATOM   2243  CE2 TYR B 141      14.078  54.810  19.246  1.00 17.98           C  
ATOM   2244  CZ  TYR B 141      12.829  54.257  19.420  1.00 19.28           C  
ATOM   2245  OH  TYR B 141      11.746  54.875  18.844  1.00 23.12           O  
ATOM   2246  N   LEU B 142      19.461  51.262  21.496  1.00 16.18           N  
ATOM   2247  CA  LEU B 142      20.589  51.336  22.426  1.00 12.89           C  
ATOM   2248  C   LEU B 142      21.557  52.503  22.199  1.00 12.26           C  
ATOM   2249  O   LEU B 142      21.352  53.244  21.235  1.00 11.11           O  
ATOM   2250  CB  LEU B 142      21.348  50.036  22.333  1.00 11.97           C  
ATOM   2251  CG  LEU B 142      20.688  48.745  22.732  1.00  9.70           C  
ATOM   2252  CD1 LEU B 142      21.641  47.615  22.473  1.00 11.84           C  
ATOM   2253  CD2 LEU B 142      20.404  48.731  24.216  1.00 13.46           C  
ATOM   2254  N   LEU B 143      22.600  52.702  23.049  1.00  9.83           N  
ATOM   2255  CA  LEU B 143      23.668  53.706  22.848  1.00  7.63           C  
ATOM   2256  C   LEU B 143      25.014  53.192  23.365  1.00 10.98           C  
ATOM   2257  O   LEU B 143      25.136  52.638  24.454  1.00 10.13           O  
ATOM   2258  CB  LEU B 143      23.288  54.991  23.569  1.00 11.29           C  
ATOM   2259  CG  LEU B 143      23.944  56.339  23.509  1.00  7.41           C  
ATOM   2260  CD1 LEU B 143      25.033  56.382  24.542  1.00  8.98           C  
ATOM   2261  CD2 LEU B 143      24.413  56.629  22.113  1.00 10.33           C  
ATOM   2262  N   PHE B 144      26.069  53.352  22.560  1.00 13.96           N  
ATOM   2263  CA  PHE B 144      27.373  52.829  22.903  1.00 15.34           C  
ATOM   2264  C   PHE B 144      28.547  53.816  22.797  1.00 19.37           C  
ATOM   2265  O   PHE B 144      29.611  53.418  22.339  1.00 19.47           O  
ATOM   2266  CB  PHE B 144      27.745  51.581  22.039  1.00 19.20           C  
ATOM   2267  CG  PHE B 144      26.745  50.459  21.781  1.00 18.35           C  
ATOM   2268  CD1 PHE B 144      26.006  49.892  22.795  1.00 17.88           C  
ATOM   2269  CD2 PHE B 144      26.574  50.036  20.471  1.00 20.96           C  
ATOM   2270  CE1 PHE B 144      25.091  48.908  22.481  1.00 22.52           C  
ATOM   2271  CE2 PHE B 144      25.662  49.053  20.155  1.00 18.50           C  
ATOM   2272  CZ  PHE B 144      24.917  48.490  21.153  1.00 22.44           C  
ATOM   2273  N   ALA B 145      28.526  55.121  23.145  1.00 21.13           N  
ATOM   2274  CA  ALA B 145      29.808  55.807  23.428  1.00 22.43           C  
ATOM   2275  C   ALA B 145      29.937  55.656  24.963  1.00 22.82           C  
ATOM   2276  O   ALA B 145      30.342  56.472  25.780  1.00 24.71           O  
ATOM   2277  CB  ALA B 145      29.746  57.286  23.072  1.00 23.47           C  
ATOM   2278  N   GLU B 146      29.646  54.433  25.294  1.00 24.24           N  
ATOM   2279  CA  GLU B 146      29.356  53.884  26.564  1.00 27.42           C  
ATOM   2280  C   GLU B 146      30.584  53.178  27.001  1.00 29.52           C  
ATOM   2281  O   GLU B 146      31.305  52.644  26.154  1.00 33.20           O  
ATOM   2282  CB  GLU B 146      28.228  52.900  26.367  1.00 28.65           C  
ATOM   2283  CG  GLU B 146      28.238  51.442  26.841  1.00 29.53           C  
ATOM   2284  CD  GLU B 146      28.752  50.371  25.882  1.00 30.66           C  
ATOM   2285  OE1 GLU B 146      29.035  50.664  24.721  1.00 33.80           O  
ATOM   2286  OE2 GLU B 146      28.877  49.225  26.315  1.00 31.53           O  
ATOM   2287  N   SER B 147      30.886  53.212  28.277  1.00 30.60           N  
ATOM   2288  CA  SER B 147      31.768  52.150  28.663  1.00 33.59           C  
ATOM   2289  C   SER B 147      30.797  51.373  29.540  1.00 34.91           C  
ATOM   2290  O   SER B 147      30.161  50.412  29.062  1.00 40.00           O  
ATOM   2291  CB  SER B 147      32.942  52.685  29.400  1.00 34.73           C  
ATOM   2292  OG  SER B 147      33.839  53.448  28.621  1.00 35.61           O  
ATOM   2293  N   GLY B 148      30.520  51.768  30.777  1.00 30.15           N  
ATOM   2294  CA  GLY B 148      29.521  50.991  31.479  1.00 27.62           C  
ATOM   2295  C   GLY B 148      28.215  51.630  31.116  1.00 25.69           C  
ATOM   2296  O   GLY B 148      28.084  52.750  31.574  1.00 27.68           O  
ATOM   2297  N   GLN B 149      27.408  51.135  30.165  1.00 20.32           N  
ATOM   2298  CA  GLN B 149      26.032  51.625  29.932  1.00 14.85           C  
ATOM   2299  C   GLN B 149      25.230  50.398  29.531  1.00 16.65           C  
ATOM   2300  O   GLN B 149      24.004  50.295  29.759  1.00 18.96           O  
ATOM   2301  CB  GLN B 149      25.872  52.694  28.796  1.00 11.58           C  
ATOM   2302  CG  GLN B 149      26.493  54.112  29.075  1.00 10.86           C  
ATOM   2303  CD  GLN B 149      26.482  55.169  27.972  1.00 10.83           C  
ATOM   2304  OE1 GLN B 149      25.962  54.845  26.923  1.00 16.40           O  
ATOM   2305  NE2 GLN B 149      26.977  56.423  27.970  1.00  9.37           N  
ATOM   2306  N   VAL B 150      25.931  49.397  28.956  1.00 12.52           N  
ATOM   2307  CA  VAL B 150      25.289  48.171  28.575  1.00 10.77           C  
ATOM   2308  C   VAL B 150      26.148  47.128  29.225  1.00 11.88           C  
ATOM   2309  O   VAL B 150      27.335  47.151  28.941  1.00 14.56           O  
ATOM   2310  CB  VAL B 150      25.263  48.018  27.014  1.00 10.71           C  
ATOM   2311  CG1 VAL B 150      24.191  46.985  26.638  1.00  8.87           C  
ATOM   2312  CG2 VAL B 150      24.889  49.340  26.322  1.00  7.79           C  
ATOM   2313  N   TYR B 151      25.633  46.275  30.117  1.00 14.87           N  
ATOM   2314  CA  TYR B 151      26.370  45.206  30.778  1.00 13.08           C  
ATOM   2315  C   TYR B 151      25.407  44.155  31.260  1.00 11.39           C  
ATOM   2316  O   TYR B 151      24.186  44.379  31.331  1.00  9.56           O  
ATOM   2317  CB  TYR B 151      27.201  45.600  32.036  1.00 15.19           C  
ATOM   2318  CG  TYR B 151      26.656  46.581  33.086  1.00 15.22           C  
ATOM   2319  CD1 TYR B 151      26.767  47.949  32.800  1.00 14.61           C  
ATOM   2320  CD2 TYR B 151      26.083  46.152  34.267  1.00 10.81           C  
ATOM   2321  CE1 TYR B 151      26.309  48.876  33.683  1.00 13.40           C  
ATOM   2322  CE2 TYR B 151      25.615  47.096  35.168  1.00 12.86           C  
ATOM   2323  CZ  TYR B 151      25.728  48.449  34.864  1.00 12.90           C  
ATOM   2324  OH  TYR B 151      25.185  49.435  35.677  1.00 13.88           O  
ATOM   2325  N   PHE B 152      26.050  42.996  31.483  1.00  9.09           N  
ATOM   2326  CA  PHE B 152      25.432  41.785  31.981  1.00  8.61           C  
ATOM   2327  C   PHE B 152      26.458  41.074  32.856  1.00 10.15           C  
ATOM   2328  O   PHE B 152      27.566  40.771  32.392  1.00  7.63           O  
ATOM   2329  CB  PHE B 152      25.060  40.915  30.823  1.00  9.04           C  
ATOM   2330  CG  PHE B 152      24.217  39.697  31.112  1.00  8.09           C  
ATOM   2331  CD1 PHE B 152      23.454  39.592  32.235  1.00  8.58           C  
ATOM   2332  CD2 PHE B 152      24.163  38.702  30.160  1.00 10.42           C  
ATOM   2333  CE1 PHE B 152      22.643  38.500  32.386  1.00  8.91           C  
ATOM   2334  CE2 PHE B 152      23.351  37.620  30.319  1.00  8.99           C  
ATOM   2335  CZ  PHE B 152      22.594  37.528  31.442  1.00  9.83           C  
ATOM   2336  N   GLY B 153      26.134  40.823  34.121  1.00 10.96           N  
ATOM   2337  CA  GLY B 153      27.074  40.143  34.989  1.00 15.44           C  
ATOM   2338  C   GLY B 153      26.444  39.223  36.039  1.00 17.66           C  
ATOM   2339  O   GLY B 153      25.336  39.487  36.553  1.00 20.27           O  
ATOM   2340  N   ILE B 154      27.152  38.137  36.341  1.00 12.60           N  
ATOM   2341  CA  ILE B 154      26.662  37.251  37.351  1.00 11.01           C  
ATOM   2342  C   ILE B 154      27.833  37.004  38.253  1.00 13.05           C  
ATOM   2343  O   ILE B 154      28.975  36.888  37.758  1.00 18.22           O  
ATOM   2344  CB  ILE B 154      26.159  35.882  36.806  1.00  8.34           C  
ATOM   2345  CG1 ILE B 154      27.124  35.257  35.852  1.00  4.38           C  
ATOM   2346  CG2 ILE B 154      24.819  36.090  36.155  1.00  8.89           C  
ATOM   2347  CD1 ILE B 154      26.967  33.761  36.159  1.00  7.63           C  
ATOM   2348  N   ILE B 155      27.581  36.964  39.555  1.00 13.13           N  
ATOM   2349  CA  ILE B 155      28.639  36.649  40.529  1.00 13.64           C  
ATOM   2350  C   ILE B 155      28.064  35.711  41.588  1.00 14.98           C  
ATOM   2351  O   ILE B 155      26.883  35.760  41.977  1.00 14.09           O  
ATOM   2352  CB  ILE B 155      29.207  37.995  41.120  1.00 10.25           C  
ATOM   2353  CG1 ILE B 155      30.364  37.822  42.090  1.00  8.24           C  
ATOM   2354  CG2 ILE B 155      28.049  38.677  41.791  1.00 13.55           C  
ATOM   2355  CD1 ILE B 155      31.513  36.898  41.684  1.00  6.25           C  
ATOM   2356  N   ALA B 156      28.919  34.751  41.929  1.00 13.30           N  
ATOM   2357  CA  ALA B 156      28.534  33.678  42.827  1.00 12.04           C  
ATOM   2358  C   ALA B 156      28.702  34.050  44.276  1.00 13.00           C  
ATOM   2359  O   ALA B 156      29.806  34.375  44.695  1.00 15.38           O  
ATOM   2360  CB  ALA B 156      29.373  32.463  42.572  1.00  7.04           C  
ATOM   2361  N   LEU B 157      27.601  34.081  44.990  1.00 14.34           N  
ATOM   2362  CA  LEU B 157      27.618  34.244  46.425  1.00 18.32           C  
ATOM   2363  C   LEU B 157      27.405  32.879  47.085  1.00 21.17           C  
ATOM   2364  O   LEU B 157      28.289  32.446  47.813  1.00 27.03           O  
ATOM   2365  CB  LEU B 157      26.538  35.256  46.767  1.00 15.86           C  
ATOM   2366  CG  LEU B 157      26.997  36.656  46.381  1.00 17.11           C  
ATOM   2367  CD1 LEU B 157      25.877  37.691  46.495  1.00 14.80           C  
ATOM   2368  CD2 LEU B 157      28.217  36.940  47.249  1.00 16.31           C  
ATOM   2369  OXT LEU B 157      26.408  32.193  46.828  1.00 27.02           O  
TER    2370      LEU B 157                                                      
ATOM   2371  N   ARG C   6      17.900  26.574  48.172  1.00 42.17           N  
ATOM   2372  CA  ARG C   6      17.929  27.823  48.901  1.00 43.18           C  
ATOM   2373  C   ARG C   6      19.387  27.796  49.358  1.00 43.67           C  
ATOM   2374  O   ARG C   6      20.244  28.119  48.535  1.00 40.28           O  
ATOM   2375  CB  ARG C   6      16.946  27.734  50.037  1.00 44.61           C  
ATOM   2376  N   THR C   7      19.689  27.308  50.560  1.00 44.00           N  
ATOM   2377  CA  THR C   7      21.064  26.999  50.946  1.00 46.76           C  
ATOM   2378  C   THR C   7      21.524  25.896  49.977  1.00 43.43           C  
ATOM   2379  O   THR C   7      20.722  24.953  49.889  1.00 44.35           O  
ATOM   2380  CB  THR C   7      21.033  26.518  52.420  1.00 49.19           C  
ATOM   2381  OG1 THR C   7      20.014  27.276  53.095  1.00 50.57           O  
ATOM   2382  CG2 THR C   7      22.390  26.694  53.111  1.00 52.39           C  
ATOM   2383  N   PRO C   8      22.612  25.828  49.192  1.00 41.90           N  
ATOM   2384  CA  PRO C   8      24.003  26.033  49.556  1.00 42.98           C  
ATOM   2385  C   PRO C   8      24.376  27.489  49.829  1.00 43.50           C  
ATOM   2386  O   PRO C   8      23.473  28.316  49.928  1.00 45.67           O  
ATOM   2387  CB  PRO C   8      24.751  25.402  48.386  1.00 42.04           C  
ATOM   2388  CG  PRO C   8      23.936  25.848  47.201  1.00 40.81           C  
ATOM   2389  CD  PRO C   8      22.518  25.651  47.741  1.00 42.21           C  
ATOM   2390  N   SER C   9      25.674  27.819  49.960  1.00 41.66           N  
ATOM   2391  CA  SER C   9      26.153  29.153  50.309  1.00 41.28           C  
ATOM   2392  C   SER C   9      25.514  29.704  51.576  1.00 40.04           C  
ATOM   2393  O   SER C   9      24.618  30.531  51.435  1.00 42.69           O  
ATOM   2394  CB  SER C   9      25.882  30.103  49.139  1.00 43.13           C  
ATOM   2395  OG  SER C   9      26.385  29.565  47.915  1.00 47.90           O  
ATOM   2396  N   ASP C  10      25.831  29.320  52.833  1.00 38.16           N  
ATOM   2397  CA  ASP C  10      25.143  29.964  53.962  1.00 37.35           C  
ATOM   2398  C   ASP C  10      25.527  31.419  54.050  1.00 34.41           C  
ATOM   2399  O   ASP C  10      26.582  31.902  54.459  1.00 38.80           O  
ATOM   2400  CB  ASP C  10      25.428  29.447  55.403  1.00 40.01           C  
ATOM   2401  CG  ASP C  10      24.772  30.298  56.534  1.00 42.13           C  
ATOM   2402  OD1 ASP C  10      25.414  30.498  57.577  1.00 41.87           O  
ATOM   2403  OD2 ASP C  10      23.643  30.787  56.371  1.00 43.14           O  
ATOM   2404  N   LYS C  11      24.487  32.016  53.580  1.00 28.26           N  
ATOM   2405  CA  LYS C  11      24.300  33.415  53.550  1.00 22.78           C  
ATOM   2406  C   LYS C  11      22.860  33.387  54.014  1.00 22.07           C  
ATOM   2407  O   LYS C  11      22.089  32.578  53.503  1.00 24.37           O  
ATOM   2408  CB  LYS C  11      24.434  33.870  52.142  1.00 16.10           C  
ATOM   2409  CG  LYS C  11      25.780  34.482  51.917  1.00 14.79           C  
ATOM   2410  CD  LYS C  11      26.909  33.516  51.606  1.00 15.52           C  
ATOM   2411  CE  LYS C  11      28.214  34.273  51.424  1.00 14.31           C  
ATOM   2412  NZ  LYS C  11      28.509  34.979  52.660  1.00 21.42           N  
ATOM   2413  N   PRO C  12      22.428  34.187  54.997  1.00 19.13           N  
ATOM   2414  CA  PRO C  12      21.169  34.918  54.927  1.00 15.78           C  
ATOM   2415  C   PRO C  12      21.010  35.364  53.487  1.00 13.23           C  
ATOM   2416  O   PRO C  12      21.935  35.898  52.846  1.00 17.95           O  
ATOM   2417  CB  PRO C  12      21.361  36.027  55.931  1.00 14.71           C  
ATOM   2418  CG  PRO C  12      22.078  35.280  57.040  1.00 12.42           C  
ATOM   2419  CD  PRO C  12      23.041  34.337  56.321  1.00 17.59           C  
ATOM   2420  N   VAL C  13      19.869  35.036  52.946  1.00 12.02           N  
ATOM   2421  CA  VAL C  13      19.566  35.370  51.586  1.00 12.40           C  
ATOM   2422  C   VAL C  13      18.071  35.527  51.630  1.00 15.55           C  
ATOM   2423  O   VAL C  13      17.396  34.818  52.398  1.00 17.45           O  
ATOM   2424  CB  VAL C  13      20.033  34.206  50.660  1.00 13.59           C  
ATOM   2425  CG1 VAL C  13      19.551  32.866  51.176  1.00 11.02           C  
ATOM   2426  CG2 VAL C  13      19.562  34.494  49.247  1.00 14.26           C  
ATOM   2427  N   ALA C  14      17.570  36.493  50.881  1.00 14.59           N  
ATOM   2428  CA  ALA C  14      16.136  36.635  50.703  1.00 13.15           C  
ATOM   2429  C   ALA C  14      16.001  37.398  49.426  1.00 11.88           C  
ATOM   2430  O   ALA C  14      16.828  38.249  49.084  1.00 13.22           O  
ATOM   2431  CB  ALA C  14      15.415  37.444  51.802  1.00 10.69           C  
ATOM   2432  N   HIS C  15      15.027  36.935  48.692  1.00 11.23           N  
ATOM   2433  CA  HIS C  15      14.632  37.491  47.428  1.00 14.84           C  
ATOM   2434  C   HIS C  15      13.184  37.127  47.502  1.00 15.83           C  
ATOM   2435  O   HIS C  15      12.857  35.961  47.376  1.00 12.32           O  
ATOM   2436  CB  HIS C  15      15.218  36.795  46.205  1.00 16.10           C  
ATOM   2437  CG  HIS C  15      14.722  37.608  45.032  1.00 16.87           C  
ATOM   2438  ND1 HIS C  15      15.166  38.787  44.657  1.00 17.14           N  
ATOM   2439  CD2 HIS C  15      13.642  37.315  44.254  1.00 18.02           C  
ATOM   2440  CE1 HIS C  15      14.398  39.215  43.702  1.00 16.68           C  
ATOM   2441  NE2 HIS C  15      13.481  38.332  43.466  1.00 15.42           N  
ATOM   2442  N   VAL C  16      12.350  38.141  47.637  1.00 21.09           N  
ATOM   2443  CA  VAL C  16      10.938  38.000  47.933  1.00 23.45           C  
ATOM   2444  C   VAL C  16      10.126  38.813  46.912  1.00 26.40           C  
ATOM   2445  O   VAL C  16      10.510  39.909  46.481  1.00 28.35           O  
ATOM   2446  CB  VAL C  16      10.915  38.440  49.431  1.00 24.21           C  
ATOM   2447  CG1 VAL C  16      10.510  39.928  49.643  1.00 24.95           C  
ATOM   2448  CG2 VAL C  16      10.123  37.360  50.122  1.00 24.11           C  
ATOM   2449  N   VAL C  17       9.033  38.220  46.444  1.00 29.90           N  
ATOM   2450  CA  VAL C  17       8.185  38.773  45.378  1.00 30.35           C  
ATOM   2451  C   VAL C  17       6.956  39.459  45.943  1.00 30.41           C  
ATOM   2452  O   VAL C  17       6.597  39.133  47.082  1.00 33.83           O  
ATOM   2453  CB  VAL C  17       7.672  37.694  44.396  1.00 32.65           C  
ATOM   2454  CG1 VAL C  17       8.663  37.542  43.248  1.00 33.18           C  
ATOM   2455  CG2 VAL C  17       7.420  36.367  45.156  1.00 35.26           C  
ATOM   2456  N   ALA C  18       6.334  40.413  45.232  1.00 26.84           N  
ATOM   2457  CA  ALA C  18       5.145  41.076  45.762  1.00 26.65           C  
ATOM   2458  C   ALA C  18       3.950  40.161  45.620  1.00 28.11           C  
ATOM   2459  O   ALA C  18       4.133  38.967  45.359  1.00 29.80           O  
ATOM   2460  CB  ALA C  18       4.829  42.361  45.017  1.00 26.41           C  
ATOM   2461  N   ASN C  19       2.711  40.636  45.738  1.00 28.86           N  
ATOM   2462  CA  ASN C  19       1.609  39.697  45.609  1.00 32.47           C  
ATOM   2463  C   ASN C  19       0.471  40.235  44.776  1.00 33.38           C  
ATOM   2464  O   ASN C  19      -0.161  41.216  45.188  1.00 32.46           O  
ATOM   2465  CB  ASN C  19       1.126  39.319  47.000  1.00 32.42           C  
ATOM   2466  CG  ASN C  19      -0.106  38.445  47.018  1.00 31.95           C  
ATOM   2467  OD1 ASN C  19      -1.203  38.918  46.723  1.00 32.97           O  
ATOM   2468  ND2 ASN C  19       0.044  37.190  47.423  1.00 30.85           N  
ATOM   2469  N   PRO C  20       0.183  39.605  43.619  1.00 35.64           N  
ATOM   2470  CA  PRO C  20      -0.828  40.026  42.649  1.00 37.72           C  
ATOM   2471  C   PRO C  20      -2.241  39.625  43.035  1.00 40.04           C  
ATOM   2472  O   PRO C  20      -3.026  39.161  42.204  1.00 40.20           O  
ATOM   2473  CB  PRO C  20      -0.395  39.401  41.357  1.00 36.52           C  
ATOM   2474  CG  PRO C  20       0.139  38.071  41.833  1.00 37.06           C  
ATOM   2475  CD  PRO C  20       0.906  38.440  43.100  1.00 36.71           C  
ATOM   2476  N   GLN C  21      -2.537  39.720  44.329  1.00 41.30           N  
ATOM   2477  CA  GLN C  21      -3.837  39.425  44.841  1.00 40.11           C  
ATOM   2478  C   GLN C  21      -4.201  40.644  45.657  1.00 40.68           C  
ATOM   2479  O   GLN C  21      -5.351  41.082  45.550  1.00 42.39           O  
ATOM   2480  CB  GLN C  21      -3.788  38.162  45.698  1.00 39.07           C  
ATOM   2481  CG  GLN C  21      -3.798  36.824  44.933  1.00 40.79           C  
ATOM   2482  CD  GLN C  21      -2.784  36.553  43.805  1.00 40.22           C  
ATOM   2483  OE1 GLN C  21      -1.560  36.558  43.992  1.00 37.07           O  
ATOM   2484  NE2 GLN C  21      -3.250  36.323  42.577  1.00 38.22           N  
ATOM   2485  N   ALA C  22      -3.334  41.325  46.413  1.00 41.82           N  
ATOM   2486  CA  ALA C  22      -3.848  42.418  47.254  1.00 43.12           C  
ATOM   2487  C   ALA C  22      -4.238  43.704  46.498  1.00 43.33           C  
ATOM   2488  O   ALA C  22      -3.504  44.687  46.664  1.00 41.53           O  
ATOM   2489  CB  ALA C  22      -2.778  42.692  48.323  1.00 43.18           C  
ATOM   2490  N   GLU C  23      -5.423  43.742  45.803  1.00 42.23           N  
ATOM   2491  CA  GLU C  23      -5.783  44.762  44.787  1.00 44.53           C  
ATOM   2492  C   GLU C  23      -4.987  46.065  44.663  1.00 45.16           C  
ATOM   2493  O   GLU C  23      -4.790  46.445  43.497  1.00 44.06           O  
ATOM   2494  CB  GLU C  23      -7.252  45.267  44.817  1.00 43.85           C  
ATOM   2495  CG  GLU C  23      -7.607  45.437  43.297  1.00 46.49           C  
ATOM   2496  CD  GLU C  23      -8.636  46.469  42.770  1.00 48.53           C  
ATOM   2497  OE1 GLU C  23      -8.335  47.675  42.701  1.00 47.94           O  
ATOM   2498  OE2 GLU C  23      -9.733  46.060  42.354  1.00 49.17           O  
ATOM   2499  N   GLY C  24      -4.565  46.728  45.772  1.00 43.25           N  
ATOM   2500  CA  GLY C  24      -3.629  47.866  45.786  1.00 41.65           C  
ATOM   2501  C   GLY C  24      -2.805  47.802  47.081  1.00 39.21           C  
ATOM   2502  O   GLY C  24      -3.289  48.311  48.089  1.00 38.28           O  
ATOM   2503  N   GLN C  25      -1.614  47.179  47.185  1.00 38.48           N  
ATOM   2504  CA  GLN C  25      -0.919  47.029  48.464  1.00 35.67           C  
ATOM   2505  C   GLN C  25       0.608  46.842  48.676  1.00 35.85           C  
ATOM   2506  O   GLN C  25       1.190  47.629  49.427  1.00 40.02           O  
ATOM   2507  CB  GLN C  25      -1.588  45.928  49.148  1.00 35.27           C  
ATOM   2508  CG  GLN C  25      -1.474  46.056  50.645  1.00 36.67           C  
ATOM   2509  CD  GLN C  25      -2.359  44.977  51.202  1.00 36.71           C  
ATOM   2510  OE1 GLN C  25      -1.926  43.901  51.614  1.00 40.45           O  
ATOM   2511  NE2 GLN C  25      -3.649  45.224  51.150  1.00 35.89           N  
ATOM   2512  N   LEU C  26       1.283  45.824  48.100  1.00 32.36           N  
ATOM   2513  CA  LEU C  26       2.703  45.400  48.264  1.00 28.26           C  
ATOM   2514  C   LEU C  26       2.970  44.402  49.400  1.00 26.63           C  
ATOM   2515  O   LEU C  26       3.788  44.593  50.307  1.00 24.76           O  
ATOM   2516  CB  LEU C  26       3.715  46.555  48.501  1.00 25.98           C  
ATOM   2517  CG  LEU C  26       5.167  46.286  48.069  1.00 22.96           C  
ATOM   2518  CD1 LEU C  26       5.241  46.434  46.589  1.00 21.28           C  
ATOM   2519  CD2 LEU C  26       6.132  47.349  48.563  1.00 25.31           C  
ATOM   2520  N   GLN C  27       2.283  43.265  49.297  1.00 26.02           N  
ATOM   2521  CA  GLN C  27       2.396  42.182  50.268  1.00 29.26           C  
ATOM   2522  C   GLN C  27       3.587  41.381  49.777  1.00 29.18           C  
ATOM   2523  O   GLN C  27       3.621  41.127  48.570  1.00 32.27           O  
ATOM   2524  CB  GLN C  27       1.123  41.380  50.216  1.00 31.09           C  
ATOM   2525  CG  GLN C  27       0.816  40.406  51.330  1.00 35.31           C  
ATOM   2526  CD  GLN C  27      -0.410  39.537  50.972  1.00 38.29           C  
ATOM   2527  OE1 GLN C  27      -1.560  39.953  51.120  1.00 38.48           O  
ATOM   2528  NE2 GLN C  27      -0.248  38.298  50.479  1.00 40.60           N  
ATOM   2529  N   TRP C  28       4.589  41.041  50.586  1.00 28.15           N  
ATOM   2530  CA  TRP C  28       5.689  40.267  50.067  1.00 28.04           C  
ATOM   2531  C   TRP C  28       5.332  38.808  50.211  1.00 31.26           C  
ATOM   2532  O   TRP C  28       4.605  38.382  51.115  1.00 33.39           O  
ATOM   2533  CB  TRP C  28       6.993  40.600  50.799  1.00 25.10           C  
ATOM   2534  CG  TRP C  28       7.476  41.995  50.438  1.00 22.68           C  
ATOM   2535  CD1 TRP C  28       7.716  42.882  51.423  1.00 25.68           C  
ATOM   2536  CD2 TRP C  28       7.694  42.550  49.204  1.00 26.16           C  
ATOM   2537  NE1 TRP C  28       8.077  43.992  50.843  1.00 24.30           N  
ATOM   2538  CE2 TRP C  28       8.076  43.840  49.535  1.00 25.57           C  
ATOM   2539  CE3 TRP C  28       7.648  42.213  47.864  1.00 28.84           C  
ATOM   2540  CZ2 TRP C  28       8.395  44.780  48.594  1.00 27.03           C  
ATOM   2541  CZ3 TRP C  28       7.967  43.152  46.903  1.00 28.44           C  
ATOM   2542  CH2 TRP C  28       8.340  44.424  47.261  1.00 27.26           C  
ATOM   2543  N   LEU C  29       5.862  38.006  49.316  1.00 34.01           N  
ATOM   2544  CA  LEU C  29       5.390  36.655  49.154  1.00 37.05           C  
ATOM   2545  C   LEU C  29       6.616  35.775  49.201  1.00 39.41           C  
ATOM   2546  O   LEU C  29       7.685  36.193  48.724  1.00 41.81           O  
ATOM   2547  CB  LEU C  29       4.684  36.654  47.805  1.00 37.92           C  
ATOM   2548  CG  LEU C  29       3.709  35.628  47.242  1.00 38.39           C  
ATOM   2549  CD1 LEU C  29       4.452  34.375  46.700  1.00 36.18           C  
ATOM   2550  CD2 LEU C  29       2.647  35.448  48.309  1.00 35.60           C  
ATOM   2551  N   ASN C  30       6.480  34.580  49.785  1.00 41.21           N  
ATOM   2552  CA  ASN C  30       7.559  33.612  49.771  1.00 42.27           C  
ATOM   2553  C   ASN C  30       7.121  32.253  49.200  1.00 41.63           C  
ATOM   2554  O   ASN C  30       6.007  31.797  49.471  1.00 39.24           O  
ATOM   2555  CB  ASN C  30       8.083  33.424  51.164  1.00 44.88           C  
ATOM   2556  CG  ASN C  30       9.227  32.415  51.155  1.00 47.94           C  
ATOM   2557  OD1 ASN C  30      10.113  32.394  50.300  1.00 46.75           O  
ATOM   2558  ND2 ASN C  30       9.241  31.482  52.086  1.00 52.16           N  
ATOM   2559  N   ARG C  31       8.030  31.695  48.389  1.00 41.80           N  
ATOM   2560  CA  ARG C  31       8.021  30.433  47.647  1.00 46.41           C  
ATOM   2561  C   ARG C  31       8.030  30.460  46.127  1.00 47.46           C  
ATOM   2562  O   ARG C  31       8.484  29.466  45.534  1.00 48.31           O  
ATOM   2563  CB  ARG C  31       6.854  29.507  47.961  1.00 48.87           C  
ATOM   2564  CG  ARG C  31       7.371  28.227  48.613  1.00 49.23           C  
ATOM   2565  CD  ARG C  31       6.377  27.737  49.678  1.00 50.55           C  
ATOM   2566  NE  ARG C  31       5.993  28.840  50.549  1.00 51.29           N  
ATOM   2567  CZ  ARG C  31       6.866  29.523  51.326  1.00 50.05           C  
ATOM   2568  NH1 ARG C  31       6.410  30.563  52.032  1.00 49.46           N  
ATOM   2569  NH2 ARG C  31       8.161  29.212  51.396  1.00 45.67           N  
ATOM   2570  N   ARG C  32       7.512  31.517  45.458  1.00 49.04           N  
ATOM   2571  CA  ARG C  32       7.527  31.646  43.976  1.00 49.36           C  
ATOM   2572  C   ARG C  32       8.904  31.235  43.413  1.00 50.65           C  
ATOM   2573  O   ARG C  32       9.910  31.412  44.118  1.00 50.82           O  
ATOM   2574  CB  ARG C  32       7.210  33.110  43.604  1.00 49.22           C  
ATOM   2575  CG  ARG C  32       6.738  33.439  42.166  1.00 49.36           C  
ATOM   2576  CD  ARG C  32       5.361  34.182  42.110  1.00 47.99           C  
ATOM   2577  NE  ARG C  32       5.368  35.592  42.504  1.00 48.04           N  
ATOM   2578  CZ  ARG C  32       4.372  36.473  42.276  1.00 48.24           C  
ATOM   2579  NH1 ARG C  32       4.544  37.717  42.696  1.00 50.59           N  
ATOM   2580  NH2 ARG C  32       3.220  36.207  41.658  1.00 46.20           N  
ATOM   2581  N   ALA C  33       8.950  30.719  42.159  1.00 51.95           N  
ATOM   2582  CA  ALA C  33      10.112  30.064  41.506  1.00 48.95           C  
ATOM   2583  C   ALA C  33      11.442  30.314  42.166  1.00 46.10           C  
ATOM   2584  O   ALA C  33      12.147  29.370  42.535  1.00 47.45           O  
ATOM   2585  CB  ALA C  33      10.272  30.480  40.036  1.00 48.71           C  
ATOM   2586  N   ASN C  34      11.713  31.607  42.344  1.00 40.46           N  
ATOM   2587  CA  ASN C  34      12.859  31.984  43.106  1.00 37.03           C  
ATOM   2588  C   ASN C  34      12.406  33.126  43.985  1.00 36.10           C  
ATOM   2589  O   ASN C  34      12.081  34.239  43.571  1.00 36.00           O  
ATOM   2590  CB  ASN C  34      13.991  32.451  42.235  1.00 37.43           C  
ATOM   2591  CG  ASN C  34      15.284  32.312  43.027  1.00 36.53           C  
ATOM   2592  OD1 ASN C  34      15.816  33.263  43.623  1.00 32.54           O  
ATOM   2593  ND2 ASN C  34      15.796  31.072  43.010  1.00 35.51           N  
ATOM   2594  N   ALA C  35      12.145  32.663  45.177  1.00 33.55           N  
ATOM   2595  CA  ALA C  35      11.863  33.504  46.296  1.00 32.99           C  
ATOM   2596  C   ALA C  35      12.524  32.752  47.460  1.00 32.29           C  
ATOM   2597  O   ALA C  35      12.059  31.799  48.095  1.00 29.03           O  
ATOM   2598  CB  ALA C  35      10.366  33.654  46.558  1.00 29.94           C  
ATOM   2599  N   LEU C  36      13.795  33.119  47.544  1.00 29.32           N  
ATOM   2600  CA  LEU C  36      14.670  32.619  48.565  1.00 27.17           C  
ATOM   2601  C   LEU C  36      14.320  33.247  49.904  1.00 25.72           C  
ATOM   2602  O   LEU C  36      14.298  34.465  50.046  1.00 23.60           O  
ATOM   2603  CB  LEU C  36      16.101  32.959  48.164  1.00 24.90           C  
ATOM   2604  CG  LEU C  36      17.057  31.974  47.479  1.00 25.93           C  
ATOM   2605  CD1 LEU C  36      17.857  31.275  48.556  1.00 28.45           C  
ATOM   2606  CD2 LEU C  36      16.325  30.943  46.630  1.00 28.23           C  
ATOM   2607  N   LEU C  37      13.921  32.452  50.867  1.00 25.19           N  
ATOM   2608  CA  LEU C  37      13.882  32.933  52.234  1.00 24.66           C  
ATOM   2609  C   LEU C  37      14.607  31.743  52.854  1.00 24.34           C  
ATOM   2610  O   LEU C  37      14.082  30.624  52.985  1.00 25.50           O  
ATOM   2611  CB  LEU C  37      12.464  33.039  52.817  1.00 26.85           C  
ATOM   2612  CG  LEU C  37      12.351  33.902  54.077  1.00 27.39           C  
ATOM   2613  CD1 LEU C  37      12.073  35.336  53.645  1.00 27.35           C  
ATOM   2614  CD2 LEU C  37      11.252  33.395  54.982  1.00 27.22           C  
ATOM   2615  N   ALA C  38      15.883  31.902  53.122  1.00 17.92           N  
ATOM   2616  CA  ALA C  38      16.582  30.767  53.645  1.00 17.81           C  
ATOM   2617  C   ALA C  38      17.649  31.318  54.518  1.00 20.08           C  
ATOM   2618  O   ALA C  38      17.993  32.506  54.524  1.00 19.68           O  
ATOM   2619  CB  ALA C  38      17.240  29.927  52.568  1.00 14.86           C  
ATOM   2620  N   ASN C  39      17.904  30.297  55.331  1.00 19.67           N  
ATOM   2621  CA  ASN C  39      18.812  30.262  56.435  1.00 18.57           C  
ATOM   2622  C   ASN C  39      19.019  31.508  57.247  1.00 18.19           C  
ATOM   2623  O   ASN C  39      20.002  32.255  57.173  1.00 20.61           O  
ATOM   2624  CB  ASN C  39      20.191  29.711  55.984  1.00 20.66           C  
ATOM   2625  CG  ASN C  39      20.779  29.952  54.611  1.00 22.11           C  
ATOM   2626  OD1 ASN C  39      20.095  30.131  53.612  1.00 22.25           O  
ATOM   2627  ND2 ASN C  39      22.062  29.750  54.410  1.00 21.62           N  
ATOM   2628  N   GLY C  40      18.014  31.717  58.064  1.00 15.23           N  
ATOM   2629  CA  GLY C  40      18.186  32.747  59.060  1.00 19.94           C  
ATOM   2630  C   GLY C  40      17.144  33.822  58.955  1.00 23.12           C  
ATOM   2631  O   GLY C  40      16.406  34.081  59.911  1.00 24.98           O  
ATOM   2632  N   VAL C  41      17.126  34.469  57.786  1.00 23.21           N  
ATOM   2633  CA  VAL C  41      16.161  35.532  57.599  1.00 23.04           C  
ATOM   2634  C   VAL C  41      14.816  34.846  57.460  1.00 24.16           C  
ATOM   2635  O   VAL C  41      14.705  33.683  57.045  1.00 27.36           O  
ATOM   2636  CB  VAL C  41      16.496  36.494  56.347  1.00 18.96           C  
ATOM   2637  CG1 VAL C  41      17.683  36.008  55.565  1.00 20.24           C  
ATOM   2638  CG2 VAL C  41      15.303  36.626  55.441  1.00 18.99           C  
ATOM   2639  N   GLU C  42      13.862  35.617  57.950  1.00 24.71           N  
ATOM   2640  CA  GLU C  42      12.466  35.259  58.054  1.00 27.89           C  
ATOM   2641  C   GLU C  42      11.682  36.423  57.492  1.00 28.24           C  
ATOM   2642  O   GLU C  42      12.150  37.571  57.481  1.00 30.21           O  
ATOM   2643  CB  GLU C  42      12.014  35.074  59.531  1.00 28.90           C  
ATOM   2644  CG  GLU C  42      12.000  33.648  60.088  1.00 30.75           C  
ATOM   2645  CD  GLU C  42      13.112  33.227  61.059  1.00 33.15           C  
ATOM   2646  OE1 GLU C  42      13.129  32.037  61.439  1.00 32.71           O  
ATOM   2647  OE2 GLU C  42      13.942  34.075  61.439  1.00 34.46           O  
ATOM   2648  N   LEU C  43      10.493  36.199  56.994  1.00 27.94           N  
ATOM   2649  CA  LEU C  43       9.673  37.358  56.711  1.00 30.01           C  
ATOM   2650  C   LEU C  43       8.706  37.235  57.892  1.00 32.51           C  
ATOM   2651  O   LEU C  43       8.285  36.100  58.195  1.00 35.25           O  
ATOM   2652  CB  LEU C  43       8.931  37.228  55.359  1.00 27.10           C  
ATOM   2653  CG  LEU C  43       7.901  38.273  54.902  1.00 24.60           C  
ATOM   2654  CD1 LEU C  43       8.519  39.573  54.430  1.00 23.27           C  
ATOM   2655  CD2 LEU C  43       7.195  37.702  53.706  1.00 26.58           C  
ATOM   2656  N   ARG C  44       8.433  38.295  58.669  1.00 34.11           N  
ATOM   2657  CA  ARG C  44       7.351  38.223  59.647  1.00 35.31           C  
ATOM   2658  C   ARG C  44       6.376  39.351  59.305  1.00 32.35           C  
ATOM   2659  O   ARG C  44       5.899  39.226  58.185  1.00 31.34           O  
ATOM   2660  CB  ARG C  44       7.946  38.281  61.073  1.00 37.25           C  
ATOM   2661  CG  ARG C  44       8.319  36.825  61.475  1.00 42.76           C  
ATOM   2662  CD  ARG C  44       7.251  35.821  62.104  1.00 49.83           C  
ATOM   2663  NE  ARG C  44       6.000  35.474  61.383  1.00 55.13           N  
ATOM   2664  CZ  ARG C  44       4.913  34.855  61.955  1.00 56.02           C  
ATOM   2665  NH1 ARG C  44       3.787  34.652  61.259  1.00 54.65           N  
ATOM   2666  NH2 ARG C  44       4.904  34.388  63.210  1.00 55.68           N  
ATOM   2667  N   ASP C  45       6.009  40.475  59.943  1.00 31.48           N  
ATOM   2668  CA  ASP C  45       4.893  41.296  59.436  1.00 31.10           C  
ATOM   2669  C   ASP C  45       5.290  42.240  58.312  1.00 29.88           C  
ATOM   2670  O   ASP C  45       5.469  43.463  58.474  1.00 29.79           O  
ATOM   2671  CB  ASP C  45       4.236  42.150  60.536  1.00 34.58           C  
ATOM   2672  CG  ASP C  45       4.065  41.465  61.905  1.00 38.86           C  
ATOM   2673  OD1 ASP C  45       3.314  40.479  62.027  1.00 37.59           O  
ATOM   2674  OD2 ASP C  45       4.703  41.945  62.859  1.00 39.68           O  
ATOM   2675  N   ASN C  46       5.394  41.557  57.149  1.00 27.05           N  
ATOM   2676  CA  ASN C  46       5.753  42.064  55.816  1.00 22.50           C  
ATOM   2677  C   ASN C  46       7.167  42.636  55.686  1.00 21.01           C  
ATOM   2678  O   ASN C  46       7.469  43.412  54.773  1.00 15.58           O  
ATOM   2679  CB  ASN C  46       4.766  43.148  55.395  1.00 19.92           C  
ATOM   2680  CG  ASN C  46       4.519  43.153  53.920  1.00 18.00           C  
ATOM   2681  OD1 ASN C  46       4.249  42.119  53.308  1.00 17.06           O  
ATOM   2682  ND2 ASN C  46       4.570  44.343  53.354  1.00 15.94           N  
ATOM   2683  N   GLN C  47       8.046  42.203  56.614  1.00 19.79           N  
ATOM   2684  CA  GLN C  47       9.427  42.672  56.715  1.00 20.33           C  
ATOM   2685  C   GLN C  47      10.337  41.489  56.866  1.00 18.55           C  
ATOM   2686  O   GLN C  47       9.977  40.436  57.408  1.00 20.50           O  
ATOM   2687  CB  GLN C  47       9.759  43.533  57.941  1.00 21.52           C  
ATOM   2688  CG  GLN C  47       8.925  44.780  58.145  1.00 21.87           C  
ATOM   2689  CD  GLN C  47       9.190  45.484  59.459  1.00 19.92           C  
ATOM   2690  OE1 GLN C  47      10.327  45.794  59.793  1.00 20.73           O  
ATOM   2691  NE2 GLN C  47       8.153  45.813  60.202  1.00 18.84           N  
ATOM   2692  N   LEU C  48      11.543  41.752  56.424  1.00 18.23           N  
ATOM   2693  CA  LEU C  48      12.581  40.768  56.446  1.00 16.48           C  
ATOM   2694  C   LEU C  48      13.285  40.982  57.752  1.00 17.02           C  
ATOM   2695  O   LEU C  48      13.754  42.071  58.084  1.00 17.05           O  
ATOM   2696  CB  LEU C  48      13.500  40.987  55.236  1.00 15.73           C  
ATOM   2697  CG  LEU C  48      13.284  40.211  53.936  1.00 16.37           C  
ATOM   2698  CD1 LEU C  48      11.907  39.561  53.947  1.00 16.51           C  
ATOM   2699  CD2 LEU C  48      13.435  41.157  52.736  1.00 15.58           C  
ATOM   2700  N   VAL C  49      13.232  39.950  58.567  1.00 21.44           N  
ATOM   2701  CA  VAL C  49      13.855  40.046  59.867  1.00 24.21           C  
ATOM   2702  C   VAL C  49      15.184  39.370  59.556  1.00 22.93           C  
ATOM   2703  O   VAL C  49      15.282  38.408  58.778  1.00 21.88           O  
ATOM   2704  CB  VAL C  49      12.959  39.322  60.917  1.00 25.23           C  
ATOM   2705  CG1 VAL C  49      13.297  39.882  62.277  1.00 27.17           C  
ATOM   2706  CG2 VAL C  49      11.480  39.651  60.764  1.00 26.44           C  
ATOM   2707  N   VAL C  50      16.205  40.044  60.052  1.00 24.46           N  
ATOM   2708  CA  VAL C  50      17.589  39.726  59.756  1.00 27.29           C  
ATOM   2709  C   VAL C  50      18.216  38.960  60.891  1.00 27.32           C  
ATOM   2710  O   VAL C  50      18.133  39.430  62.023  1.00 26.80           O  
ATOM   2711  CB  VAL C  50      18.294  41.075  59.500  1.00 30.48           C  
ATOM   2712  CG1 VAL C  50      19.827  41.000  59.715  1.00 30.34           C  
ATOM   2713  CG2 VAL C  50      17.826  41.523  58.109  1.00 30.36           C  
ATOM   2714  N   PRO C  51      18.872  37.837  60.677  1.00 29.71           N  
ATOM   2715  CA  PRO C  51      19.612  37.109  61.703  1.00 31.12           C  
ATOM   2716  C   PRO C  51      21.013  37.725  61.854  1.00 32.99           C  
ATOM   2717  O   PRO C  51      21.266  38.921  61.606  1.00 36.45           O  
ATOM   2718  CB  PRO C  51      19.559  35.699  61.145  1.00 30.15           C  
ATOM   2719  CG  PRO C  51      19.891  35.933  59.694  1.00 30.13           C  
ATOM   2720  CD  PRO C  51      19.078  37.219  59.371  1.00 32.68           C  
ATOM   2721  N   SER C  52      21.944  36.837  62.177  1.00 32.71           N  
ATOM   2722  CA  SER C  52      23.350  37.105  62.321  1.00 32.49           C  
ATOM   2723  C   SER C  52      23.809  38.409  62.917  1.00 33.86           C  
ATOM   2724  O   SER C  52      23.827  38.496  64.134  1.00 37.03           O  
ATOM   2725  CB  SER C  52      23.979  36.883  60.978  1.00 32.70           C  
ATOM   2726  OG  SER C  52      23.526  35.599  60.589  1.00 34.43           O  
ATOM   2727  N   GLU C  53      24.027  39.430  62.083  1.00 32.90           N  
ATOM   2728  CA  GLU C  53      24.724  40.705  62.313  1.00 34.39           C  
ATOM   2729  C   GLU C  53      25.523  40.718  60.974  1.00 34.49           C  
ATOM   2730  O   GLU C  53      25.614  39.669  60.293  1.00 36.59           O  
ATOM   2731  CB  GLU C  53      25.749  40.713  63.498  1.00 32.40           C  
ATOM   2732  CG  GLU C  53      26.220  42.104  63.900  1.00 38.25           C  
ATOM   2733  CD  GLU C  53      26.906  42.380  65.271  1.00 42.21           C  
ATOM   2734  OE1 GLU C  53      26.745  41.648  66.262  1.00 43.44           O  
ATOM   2735  OE2 GLU C  53      27.591  43.400  65.358  1.00 41.22           O  
ATOM   2736  N   GLY C  54      26.022  41.857  60.458  1.00 32.05           N  
ATOM   2737  CA  GLY C  54      26.806  41.814  59.233  1.00 27.63           C  
ATOM   2738  C   GLY C  54      26.486  42.935  58.281  1.00 24.28           C  
ATOM   2739  O   GLY C  54      25.640  43.773  58.572  1.00 24.67           O  
ATOM   2740  N   LEU C  55      27.177  42.974  57.151  1.00 23.12           N  
ATOM   2741  CA  LEU C  55      26.947  43.930  56.074  1.00 21.02           C  
ATOM   2742  C   LEU C  55      26.092  43.204  55.039  1.00 23.60           C  
ATOM   2743  O   LEU C  55      26.544  42.255  54.370  1.00 21.29           O  
ATOM   2744  CB  LEU C  55      28.205  44.326  55.381  1.00 19.64           C  
ATOM   2745  CG  LEU C  55      29.188  45.398  55.834  1.00 19.29           C  
ATOM   2746  CD1 LEU C  55      29.123  45.771  57.288  1.00 15.07           C  
ATOM   2747  CD2 LEU C  55      30.528  44.840  55.382  1.00 16.95           C  
ATOM   2748  N   TYR C  56      24.811  43.589  55.007  1.00 21.16           N  
ATOM   2749  CA  TYR C  56      23.907  43.082  54.022  1.00 22.46           C  
ATOM   2750  C   TYR C  56      23.810  43.991  52.789  1.00 22.18           C  
ATOM   2751  O   TYR C  56      23.699  45.224  52.909  1.00 25.90           O  
ATOM   2752  CB  TYR C  56      22.531  42.916  54.646  1.00 23.24           C  
ATOM   2753  CG  TYR C  56      22.501  41.717  55.585  1.00 25.62           C  
ATOM   2754  CD1 TYR C  56      23.010  41.863  56.870  1.00 26.21           C  
ATOM   2755  CD2 TYR C  56      21.916  40.522  55.204  1.00 24.68           C  
ATOM   2756  CE1 TYR C  56      22.931  40.849  57.785  1.00 22.73           C  
ATOM   2757  CE2 TYR C  56      21.840  39.492  56.128  1.00 24.77           C  
ATOM   2758  CZ  TYR C  56      22.338  39.671  57.414  1.00 23.53           C  
ATOM   2759  OH  TYR C  56      22.194  38.688  58.379  1.00 23.73           O  
ATOM   2760  N   LEU C  57      23.918  43.384  51.586  1.00 19.70           N  
ATOM   2761  CA  LEU C  57      23.612  44.055  50.322  1.00 14.22           C  
ATOM   2762  C   LEU C  57      22.095  43.912  50.247  1.00 12.82           C  
ATOM   2763  O   LEU C  57      21.558  42.809  50.424  1.00 10.29           O  
ATOM   2764  CB  LEU C  57      24.237  43.343  49.159  1.00 11.15           C  
ATOM   2765  CG  LEU C  57      23.634  43.673  47.784  1.00 11.41           C  
ATOM   2766  CD1 LEU C  57      24.086  45.047  47.308  1.00 12.35           C  
ATOM   2767  CD2 LEU C  57      24.033  42.587  46.801  1.00 11.53           C  
ATOM   2768  N   ILE C  58      21.462  45.051  50.007  1.00  7.79           N  
ATOM   2769  CA  ILE C  58      20.013  45.230  50.075  1.00  9.55           C  
ATOM   2770  C   ILE C  58      19.581  45.751  48.703  1.00 10.77           C  
ATOM   2771  O   ILE C  58      20.201  46.657  48.130  1.00  9.91           O  
ATOM   2772  CB  ILE C  58      19.613  46.301  51.187  1.00  8.17           C  
ATOM   2773  CG1 ILE C  58      20.411  46.129  52.466  1.00 13.28           C  
ATOM   2774  CG2 ILE C  58      18.172  46.148  51.547  1.00  6.85           C  
ATOM   2775  CD1 ILE C  58      20.134  47.079  53.645  1.00 14.74           C  
ATOM   2776  N   TYR C  59      18.476  45.284  48.175  1.00  9.92           N  
ATOM   2777  CA  TYR C  59      18.007  45.760  46.900  1.00  9.72           C  
ATOM   2778  C   TYR C  59      16.468  45.646  46.833  1.00 11.02           C  
ATOM   2779  O   TYR C  59      15.930  44.789  47.542  1.00  6.08           O  
ATOM   2780  CB  TYR C  59      18.687  44.917  45.770  1.00  3.44           C  
ATOM   2781  CG  TYR C  59      18.383  43.398  45.681  1.00  3.28           C  
ATOM   2782  CD1 TYR C  59      17.209  42.906  45.161  1.00  5.20           C  
ATOM   2783  CD2 TYR C  59      19.322  42.498  46.128  1.00  2.37           C  
ATOM   2784  CE1 TYR C  59      16.987  41.555  45.088  1.00  5.49           C  
ATOM   2785  CE2 TYR C  59      19.116  41.150  46.070  1.00  2.00           C  
ATOM   2786  CZ  TYR C  59      17.946  40.675  45.561  1.00  2.60           C  
ATOM   2787  OH  TYR C  59      17.675  39.315  45.604  1.00  2.00           O  
ATOM   2788  N   SER C  60      15.778  46.501  46.028  1.00  9.52           N  
ATOM   2789  CA  SER C  60      14.405  46.256  45.575  1.00  8.04           C  
ATOM   2790  C   SER C  60      14.002  47.128  44.368  1.00 11.89           C  
ATOM   2791  O   SER C  60      14.627  48.147  44.030  1.00  9.83           O  
ATOM   2792  CB  SER C  60      13.362  46.464  46.681  1.00  5.22           C  
ATOM   2793  OG  SER C  60      13.383  47.759  47.197  1.00  6.92           O  
ATOM   2794  N   GLN C  61      12.945  46.677  43.680  1.00 14.47           N  
ATOM   2795  CA  GLN C  61      12.422  47.341  42.494  1.00 16.33           C  
ATOM   2796  C   GLN C  61      10.934  47.301  42.590  1.00 16.94           C  
ATOM   2797  O   GLN C  61      10.361  46.255  42.913  1.00 15.99           O  
ATOM   2798  CB  GLN C  61      12.758  46.647  41.201  1.00 17.20           C  
ATOM   2799  CG  GLN C  61      12.257  47.298  39.930  1.00 13.80           C  
ATOM   2800  CD  GLN C  61      12.231  46.307  38.771  1.00 13.09           C  
ATOM   2801  OE1 GLN C  61      11.263  45.581  38.587  1.00 10.56           O  
ATOM   2802  NE2 GLN C  61      13.293  46.247  37.991  1.00  7.97           N  
ATOM   2803  N   VAL C  62      10.392  48.460  42.244  1.00 17.36           N  
ATOM   2804  CA  VAL C  62       8.967  48.664  42.263  1.00 17.94           C  
ATOM   2805  C   VAL C  62       8.625  49.108  40.845  1.00 20.27           C  
ATOM   2806  O   VAL C  62       9.388  49.895  40.253  1.00 20.89           O  
ATOM   2807  CB  VAL C  62       8.546  49.779  43.284  1.00 17.69           C  
ATOM   2808  CG1 VAL C  62       8.382  49.175  44.653  1.00 16.11           C  
ATOM   2809  CG2 VAL C  62       9.593  50.898  43.340  1.00 17.78           C  
ATOM   2810  N   LEU C  63       7.522  48.627  40.263  1.00 18.48           N  
ATOM   2811  CA  LEU C  63       7.138  49.149  38.961  1.00 16.92           C  
ATOM   2812  C   LEU C  63       5.828  49.863  39.117  1.00 15.36           C  
ATOM   2813  O   LEU C  63       4.817  49.252  39.484  1.00 20.42           O  
ATOM   2814  CB  LEU C  63       6.955  48.047  37.912  1.00 15.95           C  
ATOM   2815  CG  LEU C  63       6.668  48.568  36.529  1.00 14.60           C  
ATOM   2816  CD1 LEU C  63       7.845  49.350  35.967  1.00 15.54           C  
ATOM   2817  CD2 LEU C  63       6.420  47.395  35.643  1.00 17.60           C  
ATOM   2818  N   PHE C  64       5.878  51.160  38.933  1.00 11.94           N  
ATOM   2819  CA  PHE C  64       4.655  51.893  38.933  1.00 14.61           C  
ATOM   2820  C   PHE C  64       4.112  52.001  37.491  1.00 18.63           C  
ATOM   2821  O   PHE C  64       4.844  52.214  36.509  1.00 15.01           O  
ATOM   2822  CB  PHE C  64       4.902  53.240  39.489  1.00 18.24           C  
ATOM   2823  CG  PHE C  64       5.465  53.369  40.897  1.00 19.64           C  
ATOM   2824  CD1 PHE C  64       6.849  53.549  41.075  1.00 19.52           C  
ATOM   2825  CD2 PHE C  64       4.589  53.435  41.971  1.00 15.55           C  
ATOM   2826  CE1 PHE C  64       7.325  53.822  42.339  1.00 16.67           C  
ATOM   2827  CE2 PHE C  64       5.079  53.706  43.224  1.00 12.80           C  
ATOM   2828  CZ  PHE C  64       6.435  53.906  43.399  1.00 17.45           C  
ATOM   2829  N   LYS C  65       2.796  51.866  37.358  1.00 21.25           N  
ATOM   2830  CA  LYS C  65       2.108  51.828  36.086  1.00 24.56           C  
ATOM   2831  C   LYS C  65       0.906  52.775  36.087  1.00 25.18           C  
ATOM   2832  O   LYS C  65      -0.019  52.584  36.874  1.00 23.59           O  
ATOM   2833  CB  LYS C  65       1.682  50.382  35.856  1.00 26.15           C  
ATOM   2834  CG  LYS C  65       0.598  50.144  34.778  1.00 31.49           C  
ATOM   2835  CD  LYS C  65      -0.277  48.904  35.102  1.00 34.53           C  
ATOM   2836  CE  LYS C  65      -0.781  48.813  36.579  1.00 34.28           C  
ATOM   2837  NZ  LYS C  65      -1.680  47.686  36.879  1.00 31.71           N  
ATOM   2838  N   GLY C  66       0.802  53.775  35.231  1.00 28.47           N  
ATOM   2839  CA  GLY C  66      -0.356  54.654  35.276  1.00 30.97           C  
ATOM   2840  C   GLY C  66      -0.870  54.977  33.891  1.00 32.23           C  
ATOM   2841  O   GLY C  66      -0.108  55.308  32.991  1.00 33.47           O  
ATOM   2842  N   GLN C  67      -2.155  54.848  33.654  1.00 34.34           N  
ATOM   2843  CA  GLN C  67      -2.757  55.185  32.376  1.00 38.33           C  
ATOM   2844  C   GLN C  67      -3.237  56.629  32.449  1.00 38.87           C  
ATOM   2845  O   GLN C  67      -4.334  56.968  32.905  1.00 37.97           O  
ATOM   2846  CB  GLN C  67      -3.955  54.260  32.010  1.00 40.15           C  
ATOM   2847  CG  GLN C  67      -4.718  53.468  33.089  1.00 44.61           C  
ATOM   2848  CD  GLN C  67      -3.881  52.427  33.836  1.00 46.49           C  
ATOM   2849  OE1 GLN C  67      -3.270  52.768  34.855  1.00 48.91           O  
ATOM   2850  NE2 GLN C  67      -3.761  51.162  33.420  1.00 45.91           N  
ATOM   2851  N   GLY C  68      -2.349  57.513  32.001  1.00 38.75           N  
ATOM   2852  CA  GLY C  68      -2.689  58.919  31.978  1.00 36.14           C  
ATOM   2853  C   GLY C  68      -2.079  59.547  33.194  1.00 35.85           C  
ATOM   2854  O   GLY C  68      -1.312  58.913  33.917  1.00 37.91           O  
ATOM   2855  N   CYS C  69      -2.472  60.782  33.452  1.00 37.30           N  
ATOM   2856  CA  CYS C  69      -1.960  61.558  34.565  1.00 35.78           C  
ATOM   2857  C   CYS C  69      -3.062  62.460  35.032  1.00 39.66           C  
ATOM   2858  O   CYS C  69      -3.515  63.263  34.192  1.00 37.42           O  
ATOM   2859  CB  CYS C  69      -0.818  62.438  34.158  1.00 32.48           C  
ATOM   2860  SG  CYS C  69       0.602  61.417  33.746  1.00 28.45           S  
ATOM   2861  N   PRO C  70      -3.524  62.351  36.319  1.00 43.22           N  
ATOM   2862  CA  PRO C  70      -4.522  63.243  36.922  1.00 40.67           C  
ATOM   2863  C   PRO C  70      -3.874  64.600  37.080  1.00 39.36           C  
ATOM   2864  O   PRO C  70      -2.657  64.741  36.923  1.00 37.14           O  
ATOM   2865  CB  PRO C  70      -4.895  62.615  38.250  1.00 41.09           C  
ATOM   2866  CG  PRO C  70      -4.353  61.197  38.161  1.00 42.97           C  
ATOM   2867  CD  PRO C  70      -3.058  61.409  37.354  1.00 43.58           C  
ATOM   2868  N   SER C  71      -4.748  65.601  37.260  1.00 41.21           N  
ATOM   2869  CA  SER C  71      -4.346  66.959  37.603  1.00 41.01           C  
ATOM   2870  C   SER C  71      -3.579  66.804  38.915  1.00 40.67           C  
ATOM   2871  O   SER C  71      -3.936  65.951  39.728  1.00 44.21           O  
ATOM   2872  CB  SER C  71      -5.582  67.812  37.815  1.00 41.57           C  
ATOM   2873  OG  SER C  71      -5.272  69.054  38.447  1.00 40.56           O  
ATOM   2874  N   THR C  72      -2.625  67.674  39.160  1.00 38.92           N  
ATOM   2875  CA  THR C  72      -1.729  67.609  40.295  1.00 38.54           C  
ATOM   2876  C   THR C  72      -0.699  66.496  40.180  1.00 41.12           C  
ATOM   2877  O   THR C  72      -0.807  65.483  39.476  1.00 40.55           O  
ATOM   2878  CB  THR C  72      -2.504  67.479  41.643  1.00 34.20           C  
ATOM   2879  OG1 THR C  72      -2.060  68.694  42.255  1.00 33.44           O  
ATOM   2880  CG2 THR C  72      -2.309  66.226  42.502  1.00 31.35           C  
ATOM   2881  N   HIS C  73       0.419  66.871  40.832  1.00 41.96           N  
ATOM   2882  CA  HIS C  73       1.576  66.018  40.799  1.00 42.78           C  
ATOM   2883  C   HIS C  73       1.269  64.644  41.350  1.00 42.77           C  
ATOM   2884  O   HIS C  73       0.576  64.481  42.352  1.00 42.90           O  
ATOM   2885  CB  HIS C  73       2.732  66.544  41.609  1.00 43.71           C  
ATOM   2886  CG  HIS C  73       3.982  66.586  40.742  1.00 44.30           C  
ATOM   2887  ND1 HIS C  73       4.139  66.302  39.442  1.00 44.22           N  
ATOM   2888  CD2 HIS C  73       5.183  67.027  41.220  1.00 45.31           C  
ATOM   2889  CE1 HIS C  73       5.377  66.559  39.136  1.00 44.79           C  
ATOM   2890  NE2 HIS C  73       5.990  66.993  40.199  1.00 45.19           N  
ATOM   2891  N   VAL C  74       1.717  63.745  40.470  1.00 41.74           N  
ATOM   2892  CA  VAL C  74       1.659  62.335  40.720  1.00 39.97           C  
ATOM   2893  C   VAL C  74       2.760  61.906  41.661  1.00 35.51           C  
ATOM   2894  O   VAL C  74       2.457  61.075  42.503  1.00 39.88           O  
ATOM   2895  CB  VAL C  74       1.721  61.599  39.362  1.00 41.30           C  
ATOM   2896  CG1 VAL C  74       3.022  61.952  38.636  1.00 43.50           C  
ATOM   2897  CG2 VAL C  74       1.514  60.098  39.607  1.00 41.35           C  
ATOM   2898  N   LEU C  75       3.982  62.409  41.517  1.00 30.10           N  
ATOM   2899  CA  LEU C  75       5.056  62.148  42.474  1.00 29.55           C  
ATOM   2900  C   LEU C  75       5.139  60.774  43.197  1.00 25.40           C  
ATOM   2901  O   LEU C  75       4.467  60.575  44.203  1.00 23.68           O  
ATOM   2902  CB  LEU C  75       4.963  63.326  43.461  1.00 30.60           C  
ATOM   2903  CG  LEU C  75       6.014  63.558  44.549  1.00 31.41           C  
ATOM   2904  CD1 LEU C  75       7.372  63.621  43.905  1.00 32.69           C  
ATOM   2905  CD2 LEU C  75       5.716  64.835  45.304  1.00 30.96           C  
ATOM   2906  N   LEU C  76       5.910  59.785  42.756  1.00 23.37           N  
ATOM   2907  CA  LEU C  76       5.940  58.475  43.393  1.00 24.09           C  
ATOM   2908  C   LEU C  76       7.177  58.344  44.253  1.00 24.25           C  
ATOM   2909  O   LEU C  76       8.093  59.175  44.077  1.00 25.24           O  
ATOM   2910  CB  LEU C  76       5.968  57.365  42.365  1.00 26.87           C  
ATOM   2911  CG  LEU C  76       4.813  56.929  41.467  1.00 26.50           C  
ATOM   2912  CD1 LEU C  76       3.591  57.809  41.528  1.00 26.36           C  
ATOM   2913  CD2 LEU C  76       5.433  56.886  40.086  1.00 27.75           C  
ATOM   2914  N   THR C  77       7.228  57.321  45.137  1.00 22.20           N  
ATOM   2915  CA  THR C  77       8.282  57.189  46.151  1.00 24.29           C  
ATOM   2916  C   THR C  77       8.431  55.741  46.607  1.00 22.82           C  
ATOM   2917  O   THR C  77       7.452  54.983  46.691  1.00 25.88           O  
ATOM   2918  CB  THR C  77       7.962  58.151  47.424  1.00 22.55           C  
ATOM   2919  OG1 THR C  77       8.283  59.507  47.075  1.00 22.13           O  
ATOM   2920  CG2 THR C  77       8.786  57.850  48.662  1.00 21.11           C  
ATOM   2921  N   HIS C  78       9.669  55.342  46.898  1.00 19.33           N  
ATOM   2922  CA  HIS C  78       9.916  53.991  47.345  1.00 16.77           C  
ATOM   2923  C   HIS C  78      11.013  53.986  48.397  1.00 15.66           C  
ATOM   2924  O   HIS C  78      12.146  54.334  48.066  1.00 16.79           O  
ATOM   2925  CB  HIS C  78      10.322  53.184  46.159  1.00 13.64           C  
ATOM   2926  CG  HIS C  78      10.703  51.762  46.477  1.00 14.74           C  
ATOM   2927  ND1 HIS C  78      11.801  51.183  46.054  1.00 19.10           N  
ATOM   2928  CD2 HIS C  78       9.961  50.826  47.159  1.00 17.69           C  
ATOM   2929  CE1 HIS C  78      11.730  49.927  46.444  1.00 20.93           C  
ATOM   2930  NE2 HIS C  78      10.625  49.710  47.105  1.00 17.48           N  
ATOM   2931  N   THR C  79      10.748  53.564  49.621  1.00 13.99           N  
ATOM   2932  CA  THR C  79      11.783  53.576  50.628  1.00 15.08           C  
ATOM   2933  C   THR C  79      12.088  52.188  51.230  1.00 14.23           C  
ATOM   2934  O   THR C  79      11.290  51.219  51.185  1.00 15.88           O  
ATOM   2935  CB  THR C  79      11.321  54.670  51.711  1.00 16.87           C  
ATOM   2936  OG1 THR C  79      10.928  55.821  50.975  1.00 12.55           O  
ATOM   2937  CG2 THR C  79      12.412  55.099  52.708  1.00 14.61           C  
ATOM   2938  N   ILE C  80      13.338  52.087  51.662  1.00  9.33           N  
ATOM   2939  CA  ILE C  80      13.759  50.947  52.441  1.00 12.40           C  
ATOM   2940  C   ILE C  80      14.350  51.564  53.702  1.00 10.99           C  
ATOM   2941  O   ILE C  80      15.262  52.415  53.701  1.00 10.67           O  
ATOM   2942  CB  ILE C  80      14.823  50.078  51.718  1.00 14.80           C  
ATOM   2943  CG1 ILE C  80      14.192  49.403  50.541  1.00 14.53           C  
ATOM   2944  CG2 ILE C  80      15.387  48.992  52.670  1.00 18.25           C  
ATOM   2945  CD1 ILE C  80      15.293  48.769  49.657  1.00 21.64           C  
ATOM   2946  N   SER C  81      13.697  51.180  54.789  1.00 15.14           N  
ATOM   2947  CA  SER C  81      14.076  51.622  56.127  1.00 17.36           C  
ATOM   2948  C   SER C  81      14.430  50.430  57.017  1.00 16.66           C  
ATOM   2949  O   SER C  81      13.944  49.291  56.871  1.00 15.96           O  
ATOM   2950  CB  SER C  81      12.911  52.464  56.696  1.00 16.35           C  
ATOM   2951  OG  SER C  81      11.627  51.989  56.289  1.00 23.60           O  
ATOM   2952  N   ARG C  82      15.379  50.672  57.906  1.00 16.65           N  
ATOM   2953  CA  ARG C  82      15.807  49.624  58.827  1.00 17.43           C  
ATOM   2954  C   ARG C  82      15.148  49.846  60.187  1.00 16.58           C  
ATOM   2955  O   ARG C  82      15.367  50.962  60.700  1.00 19.11           O  
ATOM   2956  CB  ARG C  82      17.340  49.691  58.903  1.00 18.16           C  
ATOM   2957  CG  ARG C  82      18.037  48.965  59.994  1.00 20.27           C  
ATOM   2958  CD  ARG C  82      18.413  49.983  61.047  1.00 23.74           C  
ATOM   2959  NE  ARG C  82      19.851  50.170  61.082  1.00 31.04           N  
ATOM   2960  CZ  ARG C  82      20.690  49.246  61.615  1.00 32.95           C  
ATOM   2961  NH1 ARG C  82      22.014  49.449  61.536  1.00 35.02           N  
ATOM   2962  NH2 ARG C  82      20.265  48.138  62.240  1.00 29.63           N  
ATOM   2963  N   ILE C  83      14.307  49.011  60.806  1.00 13.06           N  
ATOM   2964  CA  ILE C  83      14.008  49.390  62.173  1.00 16.16           C  
ATOM   2965  C   ILE C  83      14.953  48.628  63.057  1.00 15.36           C  
ATOM   2966  O   ILE C  83      15.105  47.404  63.084  1.00 12.49           O  
ATOM   2967  CB  ILE C  83      12.513  49.178  62.657  1.00 18.38           C  
ATOM   2968  CG1 ILE C  83      11.701  47.974  62.240  1.00 19.44           C  
ATOM   2969  CG2 ILE C  83      11.893  50.423  62.076  1.00 21.17           C  
ATOM   2970  CD1 ILE C  83      10.179  48.255  61.934  1.00 21.53           C  
ATOM   2971  N   ALA C  84      15.768  49.514  63.586  1.00 17.86           N  
ATOM   2972  CA  ALA C  84      16.782  49.133  64.534  1.00 22.00           C  
ATOM   2973  C   ALA C  84      16.120  48.656  65.842  1.00 26.57           C  
ATOM   2974  O   ALA C  84      15.070  49.214  66.193  1.00 26.34           O  
ATOM   2975  CB  ALA C  84      17.673  50.308  64.828  1.00 22.68           C  
ATOM   2976  N   VAL C  85      16.673  47.603  66.495  1.00 26.17           N  
ATOM   2977  CA  VAL C  85      16.134  47.060  67.730  1.00 26.53           C  
ATOM   2978  C   VAL C  85      16.900  47.605  68.946  1.00 29.44           C  
ATOM   2979  O   VAL C  85      16.518  47.358  70.077  1.00 30.09           O  
ATOM   2980  CB  VAL C  85      16.189  45.519  67.607  1.00 25.34           C  
ATOM   2981  CG1 VAL C  85      17.612  44.955  67.666  1.00 25.22           C  
ATOM   2982  CG2 VAL C  85      15.331  44.972  68.717  1.00 26.05           C  
ATOM   2983  N   SER C  86      17.949  48.416  68.793  1.00 34.87           N  
ATOM   2984  CA  SER C  86      18.684  49.001  69.908  1.00 38.74           C  
ATOM   2985  C   SER C  86      17.996  50.351  70.099  1.00 41.91           C  
ATOM   2986  O   SER C  86      16.886  50.466  70.627  1.00 44.08           O  
ATOM   2987  CB  SER C  86      20.167  49.134  69.485  1.00 38.02           C  
ATOM   2988  OG  SER C  86      20.349  49.840  68.230  1.00 38.28           O  
ATOM   2989  N   TYR C  87      18.607  51.423  69.583  1.00 46.36           N  
ATOM   2990  CA  TYR C  87      17.997  52.729  69.575  1.00 49.19           C  
ATOM   2991  C   TYR C  87      17.144  52.387  68.377  1.00 51.11           C  
ATOM   2992  O   TYR C  87      17.624  52.045  67.288  1.00 52.70           O  
ATOM   2993  CB  TYR C  87      19.034  53.854  69.289  1.00 51.03           C  
ATOM   2994  CG  TYR C  87      20.246  53.725  68.342  1.00 54.15           C  
ATOM   2995  CD1 TYR C  87      20.147  53.592  66.944  1.00 54.36           C  
ATOM   2996  CD2 TYR C  87      21.507  53.843  68.927  1.00 55.36           C  
ATOM   2997  CE1 TYR C  87      21.291  53.594  66.144  1.00 55.36           C  
ATOM   2998  CE2 TYR C  87      22.652  53.850  68.133  1.00 56.10           C  
ATOM   2999  CZ  TYR C  87      22.550  53.728  66.750  1.00 56.48           C  
ATOM   3000  OH  TYR C  87      23.734  53.747  66.013  1.00 56.16           O  
ATOM   3001  N   GLN C  88      15.896  52.157  68.769  1.00 50.00           N  
ATOM   3002  CA  GLN C  88      14.944  51.711  67.770  1.00 47.70           C  
ATOM   3003  C   GLN C  88      14.562  52.778  66.744  1.00 42.26           C  
ATOM   3004  O   GLN C  88      15.272  53.774  66.539  1.00 39.33           O  
ATOM   3005  CB  GLN C  88      13.737  51.114  68.543  1.00 47.28           C  
ATOM   3006  CG  GLN C  88      14.366  49.803  68.969  1.00 49.38           C  
ATOM   3007  CD  GLN C  88      13.883  49.022  70.173  1.00 52.51           C  
ATOM   3008  OE1 GLN C  88      13.357  47.906  70.090  1.00 53.66           O  
ATOM   3009  NE2 GLN C  88      14.119  49.553  71.356  1.00 53.73           N  
ATOM   3010  N   THR C  89      13.492  52.418  66.058  1.00 35.79           N  
ATOM   3011  CA  THR C  89      12.806  53.215  65.076  1.00 33.44           C  
ATOM   3012  C   THR C  89      13.476  53.075  63.726  1.00 31.81           C  
ATOM   3013  O   THR C  89      14.490  52.392  63.558  1.00 30.08           O  
ATOM   3014  CB  THR C  89      12.698  54.750  65.476  1.00 32.38           C  
ATOM   3015  OG1 THR C  89      11.364  55.030  65.025  1.00 26.88           O  
ATOM   3016  CG2 THR C  89      13.716  55.759  64.898  1.00 28.80           C  
ATOM   3017  N   LYS C  90      12.654  53.552  62.773  1.00 27.16           N  
ATOM   3018  CA  LYS C  90      12.994  53.507  61.395  1.00 23.74           C  
ATOM   3019  C   LYS C  90      14.080  54.516  61.235  1.00 19.67           C  
ATOM   3020  O   LYS C  90      13.982  55.669  61.640  1.00 17.55           O  
ATOM   3021  CB  LYS C  90      11.839  53.891  60.485  1.00 26.58           C  
ATOM   3022  CG  LYS C  90      10.573  53.072  60.601  1.00 31.59           C  
ATOM   3023  CD  LYS C  90       9.511  53.326  59.518  1.00 36.32           C  
ATOM   3024  CE  LYS C  90       8.240  52.531  59.872  1.00 40.31           C  
ATOM   3025  NZ  LYS C  90       7.974  51.469  58.905  1.00 43.84           N  
ATOM   3026  N   VAL C  91      15.163  53.954  60.779  1.00 19.16           N  
ATOM   3027  CA  VAL C  91      16.231  54.769  60.314  1.00 22.26           C  
ATOM   3028  C   VAL C  91      16.152  54.643  58.784  1.00 22.15           C  
ATOM   3029  O   VAL C  91      15.888  53.596  58.158  1.00 25.19           O  
ATOM   3030  CB  VAL C  91      17.536  54.249  60.911  1.00 23.43           C  
ATOM   3031  CG1 VAL C  91      18.449  53.428  60.001  1.00 24.39           C  
ATOM   3032  CG2 VAL C  91      18.223  55.526  61.255  1.00 27.70           C  
ATOM   3033  N   ASN C  92      16.345  55.759  58.137  1.00 20.67           N  
ATOM   3034  CA  ASN C  92      16.140  55.751  56.717  1.00 23.24           C  
ATOM   3035  C   ASN C  92      17.371  55.300  55.995  1.00 22.33           C  
ATOM   3036  O   ASN C  92      18.454  55.821  56.294  1.00 26.20           O  
ATOM   3037  CB  ASN C  92      15.772  57.121  56.237  1.00 24.21           C  
ATOM   3038  CG  ASN C  92      14.822  56.926  55.088  1.00 25.39           C  
ATOM   3039  OD1 ASN C  92      13.620  56.658  55.280  1.00 23.84           O  
ATOM   3040  ND2 ASN C  92      15.417  57.022  53.906  1.00 23.39           N  
ATOM   3041  N   LEU C  93      17.255  54.372  55.072  1.00 18.99           N  
ATOM   3042  CA  LEU C  93      18.480  53.942  54.452  1.00 20.70           C  
ATOM   3043  C   LEU C  93      18.472  54.358  53.006  1.00 20.04           C  
ATOM   3044  O   LEU C  93      19.353  55.031  52.504  1.00 18.08           O  
ATOM   3045  CB  LEU C  93      18.621  52.417  54.582  1.00 22.41           C  
ATOM   3046  CG  LEU C  93      18.690  51.772  55.994  1.00 21.67           C  
ATOM   3047  CD1 LEU C  93      18.695  50.251  55.917  1.00 20.87           C  
ATOM   3048  CD2 LEU C  93      19.993  52.169  56.654  1.00 23.88           C  
ATOM   3049  N   LEU C  94      17.410  54.008  52.315  1.00 22.49           N  
ATOM   3050  CA  LEU C  94      17.316  54.220  50.881  1.00 20.84           C  
ATOM   3051  C   LEU C  94      15.914  54.714  50.523  1.00 18.63           C  
ATOM   3052  O   LEU C  94      14.930  54.448  51.222  1.00 19.81           O  
ATOM   3053  CB  LEU C  94      17.603  52.866  50.159  1.00 20.67           C  
ATOM   3054  CG  LEU C  94      18.855  51.981  50.343  1.00 17.59           C  
ATOM   3055  CD1 LEU C  94      18.372  50.547  50.511  1.00 17.82           C  
ATOM   3056  CD2 LEU C  94      19.777  52.012  49.153  1.00 19.80           C  
ATOM   3057  N   SER C  95      15.804  55.463  49.463  1.00 17.00           N  
ATOM   3058  CA  SER C  95      14.531  55.807  48.891  1.00 19.59           C  
ATOM   3059  C   SER C  95      14.835  56.604  47.656  1.00 16.60           C  
ATOM   3060  O   SER C  95      15.915  57.184  47.566  1.00 19.41           O  
ATOM   3061  CB  SER C  95      13.629  56.685  49.801  1.00 23.13           C  
ATOM   3062  OG  SER C  95      14.206  57.746  50.557  1.00 28.15           O  
ATOM   3063  N   ALA C  96      13.932  56.652  46.697  1.00 11.59           N  
ATOM   3064  CA  ALA C  96      14.133  57.505  45.563  1.00  9.40           C  
ATOM   3065  C   ALA C  96      12.734  58.024  45.223  1.00 11.02           C  
ATOM   3066  O   ALA C  96      11.667  57.423  45.515  1.00  9.61           O  
ATOM   3067  CB  ALA C  96      14.767  56.659  44.441  1.00 10.46           C  
ATOM   3068  N   ILE C  97      12.812  59.232  44.665  1.00 12.27           N  
ATOM   3069  CA  ILE C  97      11.638  59.997  44.264  1.00 14.04           C  
ATOM   3070  C   ILE C  97      11.571  60.040  42.742  1.00 13.79           C  
ATOM   3071  O   ILE C  97      12.613  60.101  42.074  1.00 12.16           O  
ATOM   3072  CB  ILE C  97      11.732  61.408  44.777  1.00 15.32           C  
ATOM   3073  CG1 ILE C  97      12.484  61.524  46.084  1.00 18.93           C  
ATOM   3074  CG2 ILE C  97      10.311  61.875  44.970  1.00 16.14           C  
ATOM   3075  CD1 ILE C  97      12.775  63.019  46.398  1.00 24.53           C  
ATOM   3076  N   LYS C  98      10.364  60.022  42.180  1.00 16.76           N  
ATOM   3077  CA  LYS C  98      10.166  60.011  40.729  1.00 21.32           C  
ATOM   3078  C   LYS C  98       8.892  60.745  40.363  1.00 24.49           C  
ATOM   3079  O   LYS C  98       7.826  60.438  40.945  1.00 24.66           O  
ATOM   3080  CB  LYS C  98      10.043  58.576  40.161  1.00 19.05           C  
ATOM   3081  CG  LYS C  98      11.187  58.357  39.208  1.00 20.11           C  
ATOM   3082  CD  LYS C  98      11.403  56.964  38.712  1.00 19.85           C  
ATOM   3083  CE  LYS C  98      12.594  57.013  37.747  1.00 19.27           C  
ATOM   3084  NZ  LYS C  98      12.874  55.735  37.100  1.00 19.30           N  
ATOM   3085  N   SER C  99       8.976  61.713  39.425  1.00 24.91           N  
ATOM   3086  CA  SER C  99       7.762  62.397  38.970  1.00 26.71           C  
ATOM   3087  C   SER C  99       7.354  62.006  37.546  1.00 26.27           C  
ATOM   3088  O   SER C  99       7.924  62.580  36.628  1.00 27.93           O  
ATOM   3089  CB  SER C  99       7.968  63.933  39.086  1.00 27.10           C  
ATOM   3090  OG  SER C  99       7.396  64.450  40.297  1.00 29.76           O  
ATOM   3091  N   PRO C 100       6.437  61.085  37.244  1.00 24.43           N  
ATOM   3092  CA  PRO C 100       6.231  60.629  35.894  1.00 28.86           C  
ATOM   3093  C   PRO C 100       5.427  61.543  34.971  1.00 29.54           C  
ATOM   3094  O   PRO C 100       5.391  61.249  33.765  1.00 32.16           O  
ATOM   3095  CB  PRO C 100       5.640  59.212  36.052  1.00 28.13           C  
ATOM   3096  CG  PRO C 100       4.880  59.301  37.309  1.00 28.21           C  
ATOM   3097  CD  PRO C 100       5.936  60.064  38.124  1.00 29.10           C  
ATOM   3098  N   CYS C 101       4.845  62.659  35.471  1.00 31.60           N  
ATOM   3099  CA  CYS C 101       4.145  63.585  34.577  1.00 31.74           C  
ATOM   3100  C   CYS C 101       4.401  65.074  34.802  1.00 34.07           C  
ATOM   3101  O   CYS C 101       4.252  65.626  35.907  1.00 32.29           O  
ATOM   3102  CB  CYS C 101       2.651  63.469  34.642  1.00 28.47           C  
ATOM   3103  SG  CYS C 101       1.990  61.867  35.140  1.00 29.04           S  
ATOM   3104  N   GLN C 102       4.906  65.650  33.695  1.00 38.24           N  
ATOM   3105  CA  GLN C 102       5.016  67.090  33.477  1.00 41.39           C  
ATOM   3106  C   GLN C 102       3.615  67.492  33.012  1.00 44.05           C  
ATOM   3107  O   GLN C 102       3.021  66.597  32.372  1.00 47.51           O  
ATOM   3108  CB  GLN C 102       6.016  67.372  32.389  1.00 41.29           C  
ATOM   3109  CG  GLN C 102       7.272  67.947  33.011  1.00 46.62           C  
ATOM   3110  CD  GLN C 102       7.012  69.121  33.968  1.00 48.20           C  
ATOM   3111  OE1 GLN C 102       6.179  69.990  33.694  1.00 50.39           O  
ATOM   3112  NE2 GLN C 102       7.641  69.162  35.147  1.00 48.78           N  
ATOM   3113  N   ARG C 103       3.010  68.689  33.197  1.00 43.53           N  
ATOM   3114  CA  ARG C 103       1.565  68.761  32.892  1.00 46.28           C  
ATOM   3115  C   ARG C 103       1.125  68.318  31.463  1.00 49.98           C  
ATOM   3116  O   ARG C 103       1.666  68.781  30.447  1.00 49.90           O  
ATOM   3117  CB  ARG C 103       1.047  70.200  33.184  1.00 43.55           C  
ATOM   3118  CG  ARG C 103       0.017  70.172  34.333  1.00 39.18           C  
ATOM   3119  CD  ARG C 103      -1.330  70.807  34.027  1.00 33.36           C  
ATOM   3120  NE  ARG C 103      -1.170  72.250  33.974  1.00 35.24           N  
ATOM   3121  CZ  ARG C 103      -1.904  73.101  34.709  1.00 33.53           C  
ATOM   3122  NH1 ARG C 103      -1.719  74.424  34.629  1.00 29.70           N  
ATOM   3123  NH2 ARG C 103      -2.838  72.627  35.525  1.00 37.05           N  
ATOM   3124  N   GLU C 104       0.255  67.269  31.464  1.00 51.29           N  
ATOM   3125  CA  GLU C 104      -0.299  66.663  30.252  1.00 54.31           C  
ATOM   3126  C   GLU C 104      -1.774  66.399  30.500  1.00 55.39           C  
ATOM   3127  O   GLU C 104      -2.672  66.709  29.698  1.00 55.16           O  
ATOM   3128  CB  GLU C 104       0.354  65.297  29.857  1.00 54.63           C  
ATOM   3129  CG  GLU C 104      -0.187  64.668  28.518  1.00 55.25           C  
ATOM   3130  CD  GLU C 104       0.282  63.248  28.111  1.00 56.02           C  
ATOM   3131  OE1 GLU C 104       1.468  63.115  27.816  1.00 57.05           O  
ATOM   3132  OE2 GLU C 104      -0.511  62.290  28.060  1.00 53.47           O  
ATOM   3133  N   THR C 105      -1.976  65.772  31.659  1.00 56.59           N  
ATOM   3134  CA  THR C 105      -3.293  65.480  32.212  1.00 57.84           C  
ATOM   3135  C   THR C 105      -4.441  64.999  31.278  1.00 59.43           C  
ATOM   3136  O   THR C 105      -5.475  65.662  31.069  1.00 62.65           O  
ATOM   3137  CB  THR C 105      -3.646  66.770  33.045  1.00 57.64           C  
ATOM   3138  OG1 THR C 105      -3.185  67.978  32.402  1.00 58.43           O  
ATOM   3139  CG2 THR C 105      -2.965  66.668  34.388  1.00 55.24           C  
ATOM   3140  N   PRO C 106      -4.283  63.798  30.684  1.00 57.81           N  
ATOM   3141  CA  PRO C 106      -5.207  63.170  29.745  1.00 57.36           C  
ATOM   3142  C   PRO C 106      -6.705  63.403  29.469  1.00 55.97           C  
ATOM   3143  O   PRO C 106      -7.532  62.541  29.807  1.00 54.18           O  
ATOM   3144  CB  PRO C 106      -4.910  61.701  30.022  1.00 56.73           C  
ATOM   3145  CG  PRO C 106      -3.408  61.745  29.914  1.00 57.98           C  
ATOM   3146  CD  PRO C 106      -3.117  62.929  30.838  1.00 57.66           C  
ATOM   3147  N   GLU C 107      -7.088  64.547  28.861  1.00 53.84           N  
ATOM   3148  CA  GLU C 107      -8.433  64.627  28.313  1.00 51.81           C  
ATOM   3149  C   GLU C 107      -8.241  64.132  26.884  1.00 52.68           C  
ATOM   3150  O   GLU C 107      -8.260  62.914  26.669  1.00 51.60           O  
ATOM   3151  CB  GLU C 107      -9.060  66.082  28.345  1.00 51.38           C  
ATOM   3152  CG  GLU C 107      -8.417  67.455  27.981  1.00 50.39           C  
ATOM   3153  CD  GLU C 107      -9.355  68.698  28.066  1.00 50.49           C  
ATOM   3154  OE1 GLU C 107     -10.589  68.537  28.102  1.00 49.44           O  
ATOM   3155  OE2 GLU C 107      -8.853  69.842  28.104  1.00 47.24           O  
ATOM   3156  N   GLY C 108      -7.866  65.054  25.968  1.00 53.79           N  
ATOM   3157  CA  GLY C 108      -7.671  64.870  24.523  1.00 53.63           C  
ATOM   3158  C   GLY C 108      -7.681  63.437  24.028  1.00 51.87           C  
ATOM   3159  O   GLY C 108      -8.730  62.885  23.712  1.00 53.50           O  
ATOM   3160  N   ALA C 109      -6.524  62.802  24.031  1.00 50.86           N  
ATOM   3161  CA  ALA C 109      -6.429  61.427  23.579  1.00 49.64           C  
ATOM   3162  C   ALA C 109      -6.246  60.660  24.863  1.00 46.12           C  
ATOM   3163  O   ALA C 109      -5.142  60.452  25.362  1.00 43.95           O  
ATOM   3164  CB  ALA C 109      -5.208  61.234  22.653  1.00 50.34           C  
ATOM   3165  N   GLU C 110      -7.435  60.464  25.405  1.00 45.07           N  
ATOM   3166  CA  GLU C 110      -7.680  59.766  26.649  1.00 46.02           C  
ATOM   3167  C   GLU C 110      -6.716  58.626  26.975  1.00 47.25           C  
ATOM   3168  O   GLU C 110      -6.394  57.696  26.214  1.00 48.30           O  
ATOM   3169  CB  GLU C 110      -9.160  59.250  26.648  1.00 44.75           C  
ATOM   3170  CG  GLU C 110      -9.699  58.471  27.883  1.00 43.35           C  
ATOM   3171  CD  GLU C 110      -9.461  56.945  27.890  1.00 42.14           C  
ATOM   3172  OE1 GLU C 110      -8.946  56.405  28.876  1.00 39.84           O  
ATOM   3173  OE2 GLU C 110      -9.803  56.290  26.899  1.00 40.84           O  
ATOM   3174  N   ALA C 111      -6.282  58.862  28.207  1.00 45.65           N  
ATOM   3175  CA  ALA C 111      -5.372  58.003  28.919  1.00 45.96           C  
ATOM   3176  C   ALA C 111      -4.446  56.985  28.246  1.00 44.39           C  
ATOM   3177  O   ALA C 111      -4.833  55.818  28.170  1.00 44.89           O  
ATOM   3178  CB  ALA C 111      -6.184  57.241  29.970  1.00 47.11           C  
ATOM   3179  N   LYS C 112      -3.244  57.354  27.766  1.00 40.42           N  
ATOM   3180  CA  LYS C 112      -2.344  56.286  27.375  1.00 42.29           C  
ATOM   3181  C   LYS C 112      -1.079  56.167  28.261  1.00 39.12           C  
ATOM   3182  O   LYS C 112      -0.379  57.151  28.507  1.00 39.61           O  
ATOM   3183  CB  LYS C 112      -1.985  56.455  25.875  1.00 45.46           C  
ATOM   3184  CG  LYS C 112      -0.588  56.911  25.431  1.00 48.70           C  
ATOM   3185  CD  LYS C 112      -0.294  58.393  25.741  1.00 52.20           C  
ATOM   3186  CE  LYS C 112      -1.281  59.395  25.111  1.00 53.18           C  
ATOM   3187  NZ  LYS C 112      -1.171  59.358  23.660  1.00 55.17           N  
ATOM   3188  N   PRO C 113      -0.761  54.957  28.752  1.00 33.65           N  
ATOM   3189  CA  PRO C 113       0.191  54.645  29.824  1.00 29.90           C  
ATOM   3190  C   PRO C 113       1.651  55.083  29.995  1.00 26.82           C  
ATOM   3191  O   PRO C 113       2.432  55.095  29.031  1.00 26.45           O  
ATOM   3192  CB  PRO C 113       0.087  53.122  29.873  1.00 31.31           C  
ATOM   3193  CG  PRO C 113      -0.298  52.734  28.459  1.00 28.38           C  
ATOM   3194  CD  PRO C 113      -1.413  53.727  28.310  1.00 31.07           C  
ATOM   3195  N   TRP C 114       2.047  55.367  31.241  1.00 23.44           N  
ATOM   3196  CA  TRP C 114       3.445  55.521  31.617  1.00 21.40           C  
ATOM   3197  C   TRP C 114       3.921  54.292  32.392  1.00 16.69           C  
ATOM   3198  O   TRP C 114       3.147  53.467  32.880  1.00 18.04           O  
ATOM   3199  CB  TRP C 114       3.716  56.741  32.507  1.00 24.02           C  
ATOM   3200  CG  TRP C 114       2.770  57.173  33.632  1.00 28.25           C  
ATOM   3201  CD1 TRP C 114       1.795  58.114  33.401  1.00 28.69           C  
ATOM   3202  CD2 TRP C 114       2.833  56.800  34.961  1.00 28.45           C  
ATOM   3203  NE1 TRP C 114       1.257  58.346  34.570  1.00 28.68           N  
ATOM   3204  CE2 TRP C 114       1.838  57.594  35.517  1.00 28.87           C  
ATOM   3205  CE3 TRP C 114       3.563  55.940  35.756  1.00 27.78           C  
ATOM   3206  CZ2 TRP C 114       1.554  57.545  36.864  1.00 28.24           C  
ATOM   3207  CZ3 TRP C 114       3.282  55.893  37.099  1.00 28.39           C  
ATOM   3208  CH2 TRP C 114       2.291  56.683  37.643  1.00 26.37           C  
ATOM   3209  N   TYR C 115       5.205  54.107  32.471  1.00 11.01           N  
ATOM   3210  CA  TYR C 115       5.780  53.029  33.200  1.00  8.96           C  
ATOM   3211  C   TYR C 115       6.949  53.695  33.833  1.00 12.10           C  
ATOM   3212  O   TYR C 115       7.690  54.401  33.143  1.00  9.66           O  
ATOM   3213  CB  TYR C 115       6.296  51.947  32.334  1.00  7.53           C  
ATOM   3214  CG  TYR C 115       5.179  51.060  31.900  1.00  8.51           C  
ATOM   3215  CD1 TYR C 115       4.506  51.426  30.755  1.00 10.83           C  
ATOM   3216  CD2 TYR C 115       4.831  49.957  32.641  1.00  8.49           C  
ATOM   3217  CE1 TYR C 115       3.443  50.683  30.333  1.00 12.71           C  
ATOM   3218  CE2 TYR C 115       3.766  49.198  32.216  1.00 14.15           C  
ATOM   3219  CZ  TYR C 115       3.078  49.566  31.067  1.00 15.40           C  
ATOM   3220  OH  TYR C 115       1.992  48.822  30.617  1.00 17.19           O  
ATOM   3221  N   GLU C 116       7.092  53.450  35.142  1.00 15.98           N  
ATOM   3222  CA  GLU C 116       8.139  54.041  35.922  1.00 13.20           C  
ATOM   3223  C   GLU C 116       8.789  52.962  36.757  1.00 14.20           C  
ATOM   3224  O   GLU C 116       8.175  52.528  37.735  1.00 19.07           O  
ATOM   3225  CB  GLU C 116       7.412  55.082  36.688  1.00 16.20           C  
ATOM   3226  CG  GLU C 116       8.155  56.359  36.862  1.00 18.87           C  
ATOM   3227  CD  GLU C 116       8.693  56.834  35.544  1.00 20.51           C  
ATOM   3228  OE1 GLU C 116       9.913  56.881  35.426  1.00 21.96           O  
ATOM   3229  OE2 GLU C 116       7.896  57.121  34.654  1.00 22.71           O  
ATOM   3230  N   PRO C 117       9.942  52.378  36.428  1.00 12.93           N  
ATOM   3231  CA  PRO C 117      10.588  51.441  37.331  1.00 14.45           C  
ATOM   3232  C   PRO C 117      11.357  52.185  38.448  1.00 18.30           C  
ATOM   3233  O   PRO C 117      11.843  53.274  38.151  1.00 24.87           O  
ATOM   3234  CB  PRO C 117      11.432  50.615  36.383  1.00 10.16           C  
ATOM   3235  CG  PRO C 117      11.846  51.594  35.327  1.00  8.34           C  
ATOM   3236  CD  PRO C 117      10.588  52.424  35.128  1.00  9.50           C  
ATOM   3237  N   ILE C 118      11.480  51.805  39.723  1.00 15.72           N  
ATOM   3238  CA  ILE C 118      12.463  52.432  40.614  1.00 13.20           C  
ATOM   3239  C   ILE C 118      13.165  51.223  41.187  1.00 14.74           C  
ATOM   3240  O   ILE C 118      12.538  50.193  41.530  1.00 13.79           O  
ATOM   3241  CB  ILE C 118      11.903  53.236  41.837  1.00 12.81           C  
ATOM   3242  CG1 ILE C 118      10.980  54.348  41.414  1.00 11.17           C  
ATOM   3243  CG2 ILE C 118      13.093  53.801  42.603  1.00 12.94           C  
ATOM   3244  CD1 ILE C 118      10.428  55.206  42.533  1.00 10.87           C  
ATOM   3245  N   TYR C 119      14.486  51.362  41.222  1.00 13.46           N  
ATOM   3246  CA  TYR C 119      15.300  50.297  41.785  1.00 14.18           C  
ATOM   3247  C   TYR C 119      16.315  50.990  42.707  1.00 13.04           C  
ATOM   3248  O   TYR C 119      16.809  52.066  42.363  1.00 10.48           O  
ATOM   3249  CB  TYR C 119      16.016  49.489  40.671  1.00 11.19           C  
ATOM   3250  CG  TYR C 119      16.998  48.458  41.243  1.00 13.32           C  
ATOM   3251  CD1 TYR C 119      16.594  47.140  41.361  1.00 12.07           C  
ATOM   3252  CD2 TYR C 119      18.285  48.832  41.619  1.00 10.56           C  
ATOM   3253  CE1 TYR C 119      17.457  46.188  41.836  1.00  9.86           C  
ATOM   3254  CE2 TYR C 119      19.142  47.886  42.093  1.00  9.60           C  
ATOM   3255  CZ  TYR C 119      18.722  46.575  42.186  1.00 11.43           C  
ATOM   3256  OH  TYR C 119      19.629  45.595  42.553  1.00 15.60           O  
ATOM   3257  N   LEU C 120      16.506  50.330  43.859  1.00 10.98           N  
ATOM   3258  CA  LEU C 120      17.363  50.705  44.961  1.00 13.20           C  
ATOM   3259  C   LEU C 120      18.335  49.517  45.202  1.00 13.78           C  
ATOM   3260  O   LEU C 120      17.969  48.333  45.071  1.00 12.02           O  
ATOM   3261  CB  LEU C 120      16.509  50.940  46.225  1.00 14.84           C  
ATOM   3262  CG  LEU C 120      15.522  52.070  46.376  1.00 15.18           C  
ATOM   3263  CD1 LEU C 120      14.598  51.851  47.543  1.00 14.99           C  
ATOM   3264  CD2 LEU C 120      16.305  53.330  46.582  1.00 16.60           C  
ATOM   3265  N   GLY C 121      19.552  49.852  45.594  1.00 11.42           N  
ATOM   3266  CA  GLY C 121      20.623  48.914  45.820  1.00 13.70           C  
ATOM   3267  C   GLY C 121      21.623  49.476  46.851  1.00 12.38           C  
ATOM   3268  O   GLY C 121      21.973  50.652  46.777  1.00  8.17           O  
ATOM   3269  N   GLY C 122      22.121  48.716  47.820  1.00 10.33           N  
ATOM   3270  CA  GLY C 122      23.011  49.350  48.776  1.00 13.13           C  
ATOM   3271  C   GLY C 122      23.515  48.400  49.807  1.00 13.00           C  
ATOM   3272  O   GLY C 122      22.877  47.442  50.221  1.00 16.04           O  
ATOM   3273  N   VAL C 123      24.744  48.648  50.172  1.00 15.75           N  
ATOM   3274  CA  VAL C 123      25.407  47.749  51.092  1.00 18.41           C  
ATOM   3275  C   VAL C 123      25.422  48.409  52.459  1.00 18.62           C  
ATOM   3276  O   VAL C 123      26.029  49.474  52.607  1.00 19.64           O  
ATOM   3277  CB  VAL C 123      26.778  47.499  50.451  1.00 17.77           C  
ATOM   3278  CG1 VAL C 123      27.892  47.080  51.389  1.00 20.52           C  
ATOM   3279  CG2 VAL C 123      26.481  46.411  49.438  1.00 19.52           C  
ATOM   3280  N   PHE C 124      24.645  47.827  53.378  1.00 14.21           N  
ATOM   3281  CA  PHE C 124      24.544  48.334  54.742  1.00 17.29           C  
ATOM   3282  C   PHE C 124      24.778  47.275  55.803  1.00 17.27           C  
ATOM   3283  O   PHE C 124      24.420  46.109  55.665  1.00 11.96           O  
ATOM   3284  CB  PHE C 124      23.164  48.951  55.036  1.00 12.64           C  
ATOM   3285  CG  PHE C 124      22.818  50.086  54.085  1.00 13.95           C  
ATOM   3286  CD1 PHE C 124      22.094  49.840  52.926  1.00 13.05           C  
ATOM   3287  CD2 PHE C 124      23.231  51.369  54.381  1.00 14.42           C  
ATOM   3288  CE1 PHE C 124      21.776  50.864  52.076  1.00 12.66           C  
ATOM   3289  CE2 PHE C 124      22.913  52.403  53.526  1.00 14.71           C  
ATOM   3290  CZ  PHE C 124      22.182  52.145  52.383  1.00 15.78           C  
ATOM   3291  N   GLN C 125      25.490  47.752  56.815  1.00 19.80           N  
ATOM   3292  CA  GLN C 125      25.681  47.079  58.106  1.00 26.65           C  
ATOM   3293  C   GLN C 125      24.383  47.059  58.957  1.00 26.15           C  
ATOM   3294  O   GLN C 125      23.877  48.079  59.452  1.00 25.45           O  
ATOM   3295  CB  GLN C 125      26.762  47.788  58.957  1.00 29.82           C  
ATOM   3296  CG  GLN C 125      26.794  47.336  60.429  1.00 32.24           C  
ATOM   3297  CD  GLN C 125      27.725  46.167  60.691  1.00 36.29           C  
ATOM   3298  OE1 GLN C 125      28.909  46.473  60.946  1.00 37.05           O  
ATOM   3299  NE2 GLN C 125      27.297  44.897  60.650  1.00 33.85           N  
ATOM   3300  N   LEU C 126      23.898  45.843  59.123  1.00 25.93           N  
ATOM   3301  CA  LEU C 126      22.733  45.545  59.921  1.00 28.15           C  
ATOM   3302  C   LEU C 126      23.209  44.861  61.198  1.00 26.79           C  
ATOM   3303  O   LEU C 126      24.416  44.682  61.454  1.00 23.61           O  
ATOM   3304  CB  LEU C 126      21.790  44.624  59.096  1.00 33.40           C  
ATOM   3305  CG  LEU C 126      20.712  45.250  58.156  1.00 34.76           C  
ATOM   3306  CD1 LEU C 126      20.236  44.238  57.137  1.00 33.94           C  
ATOM   3307  CD2 LEU C 126      19.475  45.642  58.954  1.00 35.93           C  
ATOM   3308  N   GLU C 127      22.223  44.403  61.979  1.00 27.94           N  
ATOM   3309  CA  GLU C 127      22.434  43.740  63.261  1.00 24.22           C  
ATOM   3310  C   GLU C 127      21.334  42.738  63.650  1.00 21.41           C  
ATOM   3311  O   GLU C 127      20.172  42.908  63.331  1.00 17.50           O  
ATOM   3312  CB  GLU C 127      22.576  44.799  64.314  1.00 23.17           C  
ATOM   3313  CG  GLU C 127      23.892  44.446  64.948  1.00 28.04           C  
ATOM   3314  CD  GLU C 127      24.768  45.624  65.368  1.00 33.60           C  
ATOM   3315  OE1 GLU C 127      25.926  45.700  64.927  1.00 35.99           O  
ATOM   3316  OE2 GLU C 127      24.293  46.450  66.149  1.00 34.75           O  
ATOM   3317  N   LYS C 128      21.769  41.647  64.283  1.00 23.66           N  
ATOM   3318  CA  LYS C 128      20.957  40.560  64.749  1.00 24.41           C  
ATOM   3319  C   LYS C 128      19.615  40.957  65.335  1.00 23.92           C  
ATOM   3320  O   LYS C 128      19.494  41.610  66.377  1.00 28.08           O  
ATOM   3321  CB  LYS C 128      21.734  39.777  65.785  1.00 25.04           C  
ATOM   3322  CG  LYS C 128      21.153  38.371  65.873  1.00 27.90           C  
ATOM   3323  CD  LYS C 128      21.931  37.520  66.884  1.00 32.14           C  
ATOM   3324  CE  LYS C 128      21.241  36.146  67.071  1.00 36.52           C  
ATOM   3325  NZ  LYS C 128      22.223  35.093  67.371  1.00 36.52           N  
ATOM   3326  N   GLY C 129      18.638  40.569  64.530  1.00 20.85           N  
ATOM   3327  CA  GLY C 129      17.245  40.704  64.830  1.00 20.46           C  
ATOM   3328  C   GLY C 129      16.614  41.909  64.185  1.00 19.81           C  
ATOM   3329  O   GLY C 129      15.415  42.068  64.370  1.00 23.65           O  
ATOM   3330  N   ASP C 130      17.343  42.773  63.466  1.00 21.10           N  
ATOM   3331  CA  ASP C 130      16.821  43.992  62.837  1.00 16.15           C  
ATOM   3332  C   ASP C 130      15.782  43.714  61.781  1.00 16.59           C  
ATOM   3333  O   ASP C 130      15.824  42.694  61.079  1.00 17.60           O  
ATOM   3334  CB  ASP C 130      17.905  44.767  62.180  1.00 16.60           C  
ATOM   3335  CG  ASP C 130      18.693  45.716  63.064  1.00 18.33           C  
ATOM   3336  OD1 ASP C 130      19.911  45.755  62.989  1.00 17.81           O  
ATOM   3337  OD2 ASP C 130      18.098  46.476  63.803  1.00 20.73           O  
ATOM   3338  N   ARG C 131      14.813  44.607  61.717  1.00 17.77           N  
ATOM   3339  CA  ARG C 131      13.707  44.451  60.773  1.00 20.09           C  
ATOM   3340  C   ARG C 131      13.889  45.355  59.554  1.00 17.12           C  
ATOM   3341  O   ARG C 131      14.493  46.430  59.668  1.00 14.64           O  
ATOM   3342  CB  ARG C 131      12.415  44.805  61.472  1.00 23.93           C  
ATOM   3343  CG  ARG C 131      11.543  43.676  61.941  1.00 29.55           C  
ATOM   3344  CD  ARG C 131      11.701  43.522  63.452  1.00 32.87           C  
ATOM   3345  NE  ARG C 131      11.097  42.257  63.839  1.00 34.92           N  
ATOM   3346  CZ  ARG C 131       9.799  42.163  64.132  1.00 36.64           C  
ATOM   3347  NH1 ARG C 131       9.298  40.952  64.393  1.00 35.65           N  
ATOM   3348  NH2 ARG C 131       9.036  43.270  64.241  1.00 39.01           N  
ATOM   3349  N   LEU C 132      13.367  44.979  58.391  1.00 17.94           N  
ATOM   3350  CA  LEU C 132      13.615  45.715  57.157  1.00 17.88           C  
ATOM   3351  C   LEU C 132      12.342  46.021  56.392  1.00 17.87           C  
ATOM   3352  O   LEU C 132      11.551  45.141  56.029  1.00 13.86           O  
ATOM   3353  CB  LEU C 132      14.568  44.892  56.304  1.00 19.93           C  
ATOM   3354  CG  LEU C 132      15.888  45.425  55.777  1.00 22.19           C  
ATOM   3355  CD1 LEU C 132      16.527  46.355  56.798  1.00 20.45           C  
ATOM   3356  CD2 LEU C 132      16.791  44.231  55.425  1.00 19.60           C  
ATOM   3357  N   SER C 133      12.120  47.281  56.135  1.00 15.90           N  
ATOM   3358  CA  SER C 133      10.929  47.611  55.418  1.00 21.76           C  
ATOM   3359  C   SER C 133      11.100  48.188  54.009  1.00 22.80           C  
ATOM   3360  O   SER C 133      11.898  49.102  53.789  1.00 22.42           O  
ATOM   3361  CB  SER C 133      10.146  48.552  56.326  1.00 22.54           C  
ATOM   3362  OG  SER C 133       8.781  48.144  56.326  1.00 24.90           O  
ATOM   3363  N   ALA C 134      10.391  47.645  53.013  1.00 23.36           N  
ATOM   3364  CA  ALA C 134      10.327  48.292  51.688  1.00 21.92           C  
ATOM   3365  C   ALA C 134       8.881  48.835  51.521  1.00 16.23           C  
ATOM   3366  O   ALA C 134       7.910  48.070  51.552  1.00 10.71           O  
ATOM   3367  CB  ALA C 134      10.675  47.266  50.562  1.00 15.84           C  
ATOM   3368  N   GLU C 135       8.695  50.150  51.453  1.00 15.03           N  
ATOM   3369  CA  GLU C 135       7.358  50.773  51.329  1.00 18.17           C  
ATOM   3370  C   GLU C 135       7.288  51.726  50.135  1.00 19.00           C  
ATOM   3371  O   GLU C 135       8.256  52.376  49.686  1.00 19.18           O  
ATOM   3372  CB  GLU C 135       6.940  51.659  52.505  1.00 17.51           C  
ATOM   3373  CG  GLU C 135       7.215  51.104  53.898  1.00 25.93           C  
ATOM   3374  CD  GLU C 135       7.451  52.133  55.012  1.00 26.96           C  
ATOM   3375  OE1 GLU C 135       6.461  52.504  55.661  1.00 27.41           O  
ATOM   3376  OE2 GLU C 135       8.612  52.532  55.208  1.00 25.69           O  
ATOM   3377  N   ILE C 136       6.077  51.829  49.607  1.00 17.42           N  
ATOM   3378  CA  ILE C 136       5.847  52.783  48.544  1.00 15.76           C  
ATOM   3379  C   ILE C 136       4.816  53.753  49.025  1.00 14.55           C  
ATOM   3380  O   ILE C 136       4.077  53.385  49.916  1.00 16.36           O  
ATOM   3381  CB  ILE C 136       5.340  52.132  47.279  1.00 12.23           C  
ATOM   3382  CG1 ILE C 136       4.253  51.125  47.583  1.00 13.34           C  
ATOM   3383  CG2 ILE C 136       6.533  51.557  46.583  1.00 14.51           C  
ATOM   3384  CD1 ILE C 136       3.457  50.717  46.352  1.00 17.81           C  
ATOM   3385  N   ASN C 137       4.670  54.948  48.490  1.00 15.88           N  
ATOM   3386  CA  ASN C 137       3.625  55.826  48.989  1.00 21.52           C  
ATOM   3387  C   ASN C 137       2.333  55.741  48.215  1.00 22.50           C  
ATOM   3388  O   ASN C 137       1.315  56.293  48.655  1.00 22.76           O  
ATOM   3389  CB  ASN C 137       4.052  57.288  48.977  1.00 23.67           C  
ATOM   3390  CG  ASN C 137       4.164  57.834  47.570  1.00 27.38           C  
ATOM   3391  OD1 ASN C 137       4.459  57.112  46.588  1.00 23.84           O  
ATOM   3392  ND2 ASN C 137       3.935  59.141  47.560  1.00 30.41           N  
ATOM   3393  N   ARG C 138       2.340  55.096  47.055  1.00 22.25           N  
ATOM   3394  CA  ARG C 138       1.123  55.037  46.286  1.00 23.52           C  
ATOM   3395  C   ARG C 138       0.967  53.622  45.758  1.00 27.49           C  
ATOM   3396  O   ARG C 138       1.290  53.293  44.631  1.00 26.52           O  
ATOM   3397  CB  ARG C 138       1.176  56.095  45.153  1.00 21.02           C  
ATOM   3398  CG  ARG C 138       1.071  57.582  45.597  1.00 20.46           C  
ATOM   3399  CD  ARG C 138       0.325  58.501  44.621  1.00 19.32           C  
ATOM   3400  NE  ARG C 138      -0.970  57.951  44.194  1.00 18.10           N  
ATOM   3401  CZ  ARG C 138      -1.841  58.622  43.419  1.00 20.46           C  
ATOM   3402  NH1 ARG C 138      -2.927  58.025  42.965  1.00 17.67           N  
ATOM   3403  NH2 ARG C 138      -1.679  59.898  43.074  1.00 22.47           N  
ATOM   3404  N   PRO C 139       0.437  52.697  46.539  1.00 30.96           N  
ATOM   3405  CA  PRO C 139       0.098  51.357  46.062  1.00 33.00           C  
ATOM   3406  C   PRO C 139      -1.082  51.288  45.097  1.00 32.53           C  
ATOM   3407  O   PRO C 139      -1.458  50.175  44.710  1.00 37.28           O  
ATOM   3408  CB  PRO C 139      -0.127  50.549  47.336  1.00 31.44           C  
ATOM   3409  CG  PRO C 139      -0.738  51.626  48.202  1.00 36.21           C  
ATOM   3410  CD  PRO C 139       0.117  52.869  47.952  1.00 31.60           C  
ATOM   3411  N   ASP C 140      -1.745  52.397  44.747  1.00 29.20           N  
ATOM   3412  CA  ASP C 140      -2.717  52.324  43.660  1.00 28.35           C  
ATOM   3413  C   ASP C 140      -1.993  52.100  42.315  1.00 30.23           C  
ATOM   3414  O   ASP C 140      -2.453  51.319  41.479  1.00 31.02           O  
ATOM   3415  CB  ASP C 140      -3.579  53.607  43.503  1.00 26.03           C  
ATOM   3416  CG  ASP C 140      -3.046  54.962  43.964  1.00 25.26           C  
ATOM   3417  OD1 ASP C 140      -1.840  55.144  44.154  1.00 21.16           O  
ATOM   3418  OD2 ASP C 140      -3.902  55.833  44.138  1.00 24.28           O  
ATOM   3419  N   TYR C 141      -0.809  52.695  42.110  1.00 23.39           N  
ATOM   3420  CA  TYR C 141      -0.123  52.572  40.855  1.00 17.11           C  
ATOM   3421  C   TYR C 141       0.712  51.331  40.701  1.00 19.59           C  
ATOM   3422  O   TYR C 141       1.704  51.371  39.965  1.00 19.38           O  
ATOM   3423  CB  TYR C 141       0.746  53.778  40.686  1.00 18.33           C  
ATOM   3424  CG  TYR C 141      -0.024  55.009  40.335  1.00 14.60           C  
ATOM   3425  CD1 TYR C 141       0.343  56.188  40.905  1.00 13.96           C  
ATOM   3426  CD2 TYR C 141      -1.061  54.935  39.449  1.00 13.70           C  
ATOM   3427  CE1 TYR C 141      -0.366  57.313  40.566  1.00 17.87           C  
ATOM   3428  CE2 TYR C 141      -1.769  56.043  39.110  1.00 13.16           C  
ATOM   3429  CZ  TYR C 141      -1.424  57.226  39.675  1.00 15.50           C  
ATOM   3430  OH  TYR C 141      -2.193  58.338  39.386  1.00 18.94           O  
ATOM   3431  N   LEU C 142       0.364  50.211  41.311  1.00 21.77           N  
ATOM   3432  CA  LEU C 142       1.255  49.082  41.212  1.00 25.93           C  
ATOM   3433  C   LEU C 142       0.812  48.176  40.087  1.00 29.40           C  
ATOM   3434  O   LEU C 142      -0.386  47.854  40.038  1.00 29.31           O  
ATOM   3435  CB  LEU C 142       1.289  48.288  42.528  1.00 26.37           C  
ATOM   3436  CG  LEU C 142       2.321  48.563  43.650  1.00 26.15           C  
ATOM   3437  CD1 LEU C 142       2.067  47.597  44.833  1.00 19.68           C  
ATOM   3438  CD2 LEU C 142       3.753  48.402  43.101  1.00 26.48           C  
ATOM   3439  N   LEU C 143       1.754  47.819  39.184  1.00 32.84           N  
ATOM   3440  CA  LEU C 143       1.454  46.885  38.115  1.00 36.67           C  
ATOM   3441  C   LEU C 143       1.599  45.444  38.592  1.00 39.40           C  
ATOM   3442  O   LEU C 143       2.397  45.088  39.462  1.00 39.66           O  
ATOM   3443  CB  LEU C 143       2.379  47.085  36.882  1.00 37.23           C  
ATOM   3444  CG  LEU C 143       2.127  46.164  35.624  1.00 38.77           C  
ATOM   3445  CD1 LEU C 143       2.360  46.886  34.307  1.00 41.14           C  
ATOM   3446  CD2 LEU C 143       3.084  44.993  35.651  1.00 35.58           C  
ATOM   3447  N   PHE C 144       0.844  44.588  37.916  1.00 42.68           N  
ATOM   3448  CA  PHE C 144       0.796  43.170  38.201  1.00 44.17           C  
ATOM   3449  C   PHE C 144       1.281  42.294  37.033  1.00 43.28           C  
ATOM   3450  O   PHE C 144       0.655  42.300  35.966  1.00 41.48           O  
ATOM   3451  CB  PHE C 144      -0.665  42.795  38.560  1.00 46.45           C  
ATOM   3452  CG  PHE C 144      -1.334  43.570  39.700  1.00 47.87           C  
ATOM   3453  CD1 PHE C 144      -0.653  43.862  40.873  1.00 49.40           C  
ATOM   3454  CD2 PHE C 144      -2.668  43.931  39.589  1.00 48.61           C  
ATOM   3455  CE1 PHE C 144      -1.312  44.505  41.914  1.00 50.46           C  
ATOM   3456  CE2 PHE C 144      -3.320  44.570  40.639  1.00 48.33           C  
ATOM   3457  CZ  PHE C 144      -2.650  44.861  41.805  1.00 48.38           C  
ATOM   3458  N   ALA C 145       2.416  41.604  37.116  1.00 44.88           N  
ATOM   3459  CA  ALA C 145       2.735  40.537  36.149  1.00 46.40           C  
ATOM   3460  C   ALA C 145       3.991  39.914  36.732  1.00 46.11           C  
ATOM   3461  O   ALA C 145       5.051  39.715  36.143  1.00 47.93           O  
ATOM   3462  CB  ALA C 145       3.040  41.101  34.759  1.00 46.73           C  
ATOM   3463  N   GLU C 146       3.819  39.449  37.950  1.00 47.26           N  
ATOM   3464  CA  GLU C 146       5.015  39.198  38.738  1.00 48.02           C  
ATOM   3465  C   GLU C 146       6.018  38.052  38.730  1.00 43.72           C  
ATOM   3466  O   GLU C 146       5.763  36.848  38.704  1.00 46.36           O  
ATOM   3467  CB  GLU C 146       4.645  39.367  40.262  1.00 47.22           C  
ATOM   3468  CG  GLU C 146       4.618  40.759  40.913  1.00 46.32           C  
ATOM   3469  CD  GLU C 146       3.374  41.594  40.607  1.00 47.46           C  
ATOM   3470  OE1 GLU C 146       2.273  41.035  40.583  1.00 47.96           O  
ATOM   3471  OE2 GLU C 146       3.491  42.806  40.426  1.00 46.28           O  
ATOM   3472  N   SER C 147       7.202  38.574  38.622  1.00 38.80           N  
ATOM   3473  CA  SER C 147       8.278  37.978  39.371  1.00 40.21           C  
ATOM   3474  C   SER C 147       9.293  39.106  39.299  1.00 35.79           C  
ATOM   3475  O   SER C 147       9.331  39.963  40.190  1.00 35.90           O  
ATOM   3476  CB  SER C 147       8.894  36.643  38.802  1.00 43.18           C  
ATOM   3477  OG  SER C 147       9.483  36.688  37.499  1.00 47.59           O  
ATOM   3478  N   GLY C 148       9.992  39.275  38.189  1.00 31.00           N  
ATOM   3479  CA  GLY C 148      11.048  40.230  38.159  1.00 27.33           C  
ATOM   3480  C   GLY C 148      10.648  41.644  37.992  1.00 24.16           C  
ATOM   3481  O   GLY C 148      11.477  42.401  37.526  1.00 26.64           O  
ATOM   3482  N   GLN C 149       9.490  42.018  38.480  1.00 19.56           N  
ATOM   3483  CA  GLN C 149       8.969  43.309  38.205  1.00 20.53           C  
ATOM   3484  C   GLN C 149       8.765  44.192  39.446  1.00 18.76           C  
ATOM   3485  O   GLN C 149       8.881  45.431  39.412  1.00 15.98           O  
ATOM   3486  CB  GLN C 149       7.744  42.939  37.411  1.00 18.12           C  
ATOM   3487  CG  GLN C 149       7.318  44.096  36.584  1.00 18.72           C  
ATOM   3488  CD  GLN C 149       6.305  43.653  35.568  1.00 23.98           C  
ATOM   3489  OE1 GLN C 149       5.289  43.031  35.915  1.00 27.89           O  
ATOM   3490  NE2 GLN C 149       6.544  43.978  34.303  1.00 23.20           N  
ATOM   3491  N   VAL C 150       8.354  43.539  40.552  1.00 18.77           N  
ATOM   3492  CA  VAL C 150       8.254  44.189  41.866  1.00 15.86           C  
ATOM   3493  C   VAL C 150       8.928  43.180  42.809  1.00 14.85           C  
ATOM   3494  O   VAL C 150       8.302  42.167  43.154  1.00 13.53           O  
ATOM   3495  CB  VAL C 150       6.771  44.428  42.333  1.00 14.39           C  
ATOM   3496  CG1 VAL C 150       6.870  45.312  43.557  1.00 12.57           C  
ATOM   3497  CG2 VAL C 150       5.872  45.072  41.281  1.00 11.33           C  
ATOM   3498  N   TYR C 151      10.174  43.353  43.249  1.00 14.28           N  
ATOM   3499  CA  TYR C 151      10.843  42.335  44.080  1.00 14.47           C  
ATOM   3500  C   TYR C 151      11.611  42.985  45.210  1.00 14.26           C  
ATOM   3501  O   TYR C 151      11.795  44.215  45.112  1.00 15.27           O  
ATOM   3502  CB  TYR C 151      11.779  41.519  43.202  1.00 11.94           C  
ATOM   3503  CG  TYR C 151      12.703  42.342  42.295  1.00 15.17           C  
ATOM   3504  CD1 TYR C 151      12.434  42.470  40.937  1.00 15.27           C  
ATOM   3505  CD2 TYR C 151      13.833  42.956  42.811  1.00 15.79           C  
ATOM   3506  CE1 TYR C 151      13.267  43.186  40.094  1.00 14.18           C  
ATOM   3507  CE2 TYR C 151      14.676  43.672  41.984  1.00 18.52           C  
ATOM   3508  CZ  TYR C 151      14.407  43.794  40.616  1.00 17.66           C  
ATOM   3509  OH  TYR C 151      15.311  44.491  39.808  1.00 13.62           O  
ATOM   3510  N   PHE C 152      12.063  42.224  46.240  1.00 15.72           N  
ATOM   3511  CA  PHE C 152      12.901  42.721  47.380  1.00 13.81           C  
ATOM   3512  C   PHE C 152      13.991  41.724  47.827  1.00 11.63           C  
ATOM   3513  O   PHE C 152      13.692  40.521  47.807  1.00 11.70           O  
ATOM   3514  CB  PHE C 152      12.002  43.048  48.621  1.00 13.34           C  
ATOM   3515  CG  PHE C 152      12.606  43.823  49.808  1.00  8.39           C  
ATOM   3516  CD1 PHE C 152      11.820  44.050  50.896  1.00  5.20           C  
ATOM   3517  CD2 PHE C 152      13.901  44.314  49.816  1.00  9.79           C  
ATOM   3518  CE1 PHE C 152      12.330  44.763  51.957  1.00  6.32           C  
ATOM   3519  CE2 PHE C 152      14.427  45.029  50.879  1.00 11.99           C  
ATOM   3520  CZ  PHE C 152      13.619  45.262  51.972  1.00  9.71           C  
ATOM   3521  N   GLY C 153      15.210  42.127  48.233  1.00  6.65           N  
ATOM   3522  CA  GLY C 153      16.202  41.187  48.701  1.00  9.63           C  
ATOM   3523  C   GLY C 153      17.454  41.748  49.385  1.00 13.08           C  
ATOM   3524  O   GLY C 153      17.858  42.912  49.245  1.00 12.92           O  
ATOM   3525  N   ILE C 154      18.035  40.812  50.146  1.00 11.82           N  
ATOM   3526  CA  ILE C 154      19.250  40.984  50.908  1.00 10.56           C  
ATOM   3527  C   ILE C 154      20.022  39.693  50.773  1.00 12.44           C  
ATOM   3528  O   ILE C 154      19.443  38.606  50.559  1.00  7.32           O  
ATOM   3529  CB  ILE C 154      19.121  41.176  52.469  1.00 11.44           C  
ATOM   3530  CG1 ILE C 154      18.157  40.194  53.082  1.00 11.04           C  
ATOM   3531  CG2 ILE C 154      18.719  42.590  52.751  1.00 12.35           C  
ATOM   3532  CD1 ILE C 154      18.404  39.800  54.537  1.00 10.92           C  
ATOM   3533  N   ILE C 155      21.340  39.901  50.897  1.00 15.15           N  
ATOM   3534  CA  ILE C 155      22.290  38.809  51.048  1.00 20.41           C  
ATOM   3535  C   ILE C 155      23.517  39.237  51.853  1.00 23.66           C  
ATOM   3536  O   ILE C 155      24.015  40.380  51.702  1.00 25.65           O  
ATOM   3537  CB  ILE C 155      22.689  38.305  49.684  1.00 21.34           C  
ATOM   3538  CG1 ILE C 155      23.477  37.019  49.886  1.00 22.29           C  
ATOM   3539  CG2 ILE C 155      23.400  39.405  48.907  1.00 19.99           C  
ATOM   3540  CD1 ILE C 155      23.278  36.067  48.693  1.00 22.88           C  
ATOM   3541  N   ALA C 156      23.991  38.350  52.742  1.00 20.68           N  
ATOM   3542  CA  ALA C 156      25.112  38.793  53.582  1.00 22.25           C  
ATOM   3543  C   ALA C 156      26.392  38.604  52.789  1.00 21.68           C  
ATOM   3544  O   ALA C 156      26.500  37.629  52.030  1.00 21.40           O  
ATOM   3545  CB  ALA C 156      25.159  37.992  54.935  1.00 18.71           C  
ATOM   3546  N   LEU C 157      27.244  39.627  52.858  1.00 21.98           N  
ATOM   3547  CA  LEU C 157      28.544  39.590  52.224  1.00 25.17           C  
ATOM   3548  C   LEU C 157      29.508  39.713  53.399  1.00 26.61           C  
ATOM   3549  O   LEU C 157      30.023  40.797  53.711  1.00 28.30           O  
ATOM   3550  CB  LEU C 157      28.736  40.770  51.244  1.00 25.98           C  
ATOM   3551  CG  LEU C 157      27.773  41.068  50.116  1.00 24.69           C  
ATOM   3552  CD1 LEU C 157      28.290  42.228  49.287  1.00 28.41           C  
ATOM   3553  CD2 LEU C 157      27.635  39.863  49.242  1.00 23.47           C  
ATOM   3554  OXT LEU C 157      29.679  38.681  54.054  1.00 32.30           O  
TER    3555      LEU C 157                                                      
CONECT  490  733                                                                
CONECT  733  490                                                                
CONECT 1675 1918                                                                
CONECT 1918 1675                                                                
CONECT 2860 3103                                                                
CONECT 3103 2860                                                                
MASTER      477    2    0    3   30    0    0   15 3552    3    6   39          
END                                                                             
