# Supplementary material for: A Network Pharmacology-Based Study on Irritable Bowel Syndrome Prevention and Treatment Utilizing Shenling Baizhu Powder
Source: Biomed Res Int. 2021 Nov 23;2021:4579850. doi: 10.1155/2021/4579850 (PMC8632384; doi:10.1155/2021/4579850)
Supplement: Supplementary Materials — Please find detailed data in the supplementary file, including the original data of SymMap, metabolomics, and molecular docking of Shenling Baizhu powder. “Shenling Baizhu powder SymMap” includes all herbal targets and combined targets. “Shenling Baizhu powder metabolomics” includes two-dimensional structural data analysis. “Molecular docking” involves molecule-target docking and the results. [file 4579850.f1.zip › Data in brief/3. Molecular docking/Molecular-targets for docking/1tnf.pdbqt]

REMARK   4 XXXX COMPLIES WITH FORMAT V. 2.0
ATOM      1  N   ARG A   6      29.842  48.919  61.586  1.00 39.68    -0.263 N 
ATOM      2  HN1 ARG A   6      30.065  49.405  60.718  1.00  0.00     0.312 HD
ATOM      3  HN2 ARG A   6      29.162  49.442  62.139  1.00  0.00     0.312 HD
ATOM      4  HN3 ARG A   6      29.293  48.078  61.409  1.00  0.00     0.312 HD
ATOM      5  CA  ARG A   6      31.034  48.617  62.363  1.00 41.52     0.292 C 
ATOM      6  HA  ARG A   6      31.631  49.538  62.559  1.00  0.00     0.000 H 
ATOM      7  C   ARG A   6      31.777  47.668  61.426  1.00 40.88     0.526 C 
ATOM      8  O   ARG A   6      31.635  47.872  60.214  1.00 39.93    -0.500 OA
ATOM      9  CB  ARG A   6      30.699  47.888  63.665  1.00 40.94     0.049 C 
ATOM     10  HB1 ARG A   6      30.156  48.581  64.349  1.00  0.00     0.000 H 
ATOM     11  HB2 ARG A   6      31.603  47.444  64.144  1.00  0.00     0.000 H 
ATOM     12  HB3 ARG A   6      30.134  46.944  63.486  1.00  0.00     0.000 H 
ATOM     13  N   THR A   7      32.515  46.661  61.862  1.00 38.88    -0.520 N 
ATOM     14  HN  THR A   7      32.574  46.476  62.863  1.00  0.00     0.248 HD
ATOM     15  CA  THR A   7      33.238  45.820  60.939  1.00 37.32     0.268 C 
ATOM     16  HA  THR A   7      33.054  46.118  59.881  1.00  0.00     0.000 H 
ATOM     17  C   THR A   7      32.639  44.461  61.249  1.00 35.81     0.526 C 
ATOM     18  O   THR A   7      32.844  43.996  62.368  1.00 38.75    -0.500 OA
ATOM     19  CB  THR A   7      34.737  45.950  61.317  1.00 38.85     0.211 C 
ATOM     20  HB  THR A   7      34.888  45.480  62.317  1.00  0.00     0.000 H 
ATOM     21  OG1 THR A   7      35.001  47.356  61.436  1.00 37.13    -0.550 OA
ATOM     22  HG1 THR A   7      35.919  47.436  61.667  1.00  0.00     0.310 HD
ATOM     23  CG2 THR A   7      35.673  45.269  60.320  1.00 38.78     0.007 C 
ATOM     24 1HG2 THR A   7      36.750  45.362  60.592  1.00  0.00     0.000 H 
ATOM     25 2HG2 THR A   7      35.491  45.645  59.286  1.00  0.00     0.000 H 
ATOM     26 3HG2 THR A   7      35.391  44.199  60.179  1.00  0.00     0.000 H 
ATOM     27  N   PRO A   8      31.831  43.760  60.486  1.00 33.97    -0.257 N 
ATOM     28  CA  PRO A   8      32.242  42.447  59.976  1.00 32.94     0.112 C 
ATOM     29  HA  PRO A   8      32.725  41.907  60.823  1.00  0.00     0.000 H 
ATOM     30  C   PRO A   8      33.203  42.383  58.808  1.00 32.17     0.526 C 
ATOM     31  O   PRO A   8      33.427  43.309  58.045  1.00 30.87    -0.500 OA
ATOM     32  CB  PRO A   8      30.965  41.696  59.644  1.00 31.60    -0.001 C 
ATOM     33  HB1 PRO A   8      30.719  40.850  60.327  1.00  0.00     0.000 H 
ATOM     34  HB2 PRO A   8      31.006  41.072  58.721  1.00  0.00     0.000 H 
ATOM     35  CG  PRO A   8      29.963  42.810  59.619  1.00 33.61     0.036 C 
ATOM     36  HG1 PRO A   8      29.861  43.315  58.630  1.00  0.00     0.000 H 
ATOM     37  HG2 PRO A   8      28.902  42.476  59.691  1.00  0.00     0.000 H 
ATOM     38  CD  PRO A   8      30.407  43.716  60.737  1.00 31.93     0.084 C 
ATOM     39  HD1 PRO A   8      30.106  43.401  61.763  1.00  0.00     0.000 H 
ATOM     40  HD2 PRO A   8      29.895  44.705  60.791  1.00  0.00     0.000 H 
ATOM     41  N   SER A   9      33.724  41.170  58.786  1.00 35.97    -0.520 N 
ATOM     42  HN  SER A   9      33.456  40.552  59.552  1.00  0.00     0.248 HD
ATOM     43  CA  SER A   9      34.629  40.613  57.806  1.00 38.87     0.292 C 
ATOM     44  HA  SER A   9      34.861  39.574  58.138  1.00  0.00     0.000 H 
ATOM     45  C   SER A   9      35.975  41.307  57.557  1.00 40.16     0.526 C 
ATOM     46  O   SER A   9      36.183  42.491  57.855  1.00 40.43    -0.500 OA
ATOM     47  CB  SER A   9      33.763  40.490  56.548  1.00 39.21     0.194 C 
ATOM     48  HB1 SER A   9      33.573  41.478  56.067  1.00  0.00     0.000 H 
ATOM     49  HB2 SER A   9      34.309  40.006  55.705  1.00  0.00     0.000 H 
ATOM     50  OG  SER A   9      32.557  39.807  56.872  1.00 43.46    -0.550 OA
ATOM     51  HG  SER A   9      32.020  39.731  56.092  1.00  0.00     0.310 HD
ATOM     52  N   ASP A  10      36.973  40.551  57.075  1.00 41.38    -0.520 N 
ATOM     53  HN  ASP A  10      36.853  39.542  56.990  1.00  0.00     0.248 HD
ATOM     54  CA  ASP A  10      38.221  41.169  56.676  1.00 42.83     0.246 C 
ATOM     55  HA  ASP A  10      38.388  42.100  57.266  1.00  0.00     0.000 H 
ATOM     56  C   ASP A  10      38.068  41.514  55.187  1.00 40.20     0.526 C 
ATOM     57  O   ASP A  10      38.846  41.130  54.320  1.00 41.24    -0.500 OA
ATOM     58  CB  ASP A  10      39.394  40.192  56.895  1.00 47.82    -0.208 C 
ATOM     59  HB1 ASP A  10      39.338  39.368  56.145  1.00  0.00     0.000 H 
ATOM     60  HB2 ASP A  10      39.233  39.622  57.840  1.00  0.00     0.000 H 
ATOM     61  CG  ASP A  10      40.825  40.799  56.893  1.00 50.02     0.620 C 
ATOM     62  OD1 ASP A  10      41.790  40.011  56.996  1.00 51.28    -0.706 OA
ATOM     63  OD2 ASP A  10      40.986  42.031  56.856  1.00 49.89    -0.706 OA
ATOM     64  N   LYS A  11      37.045  42.270  54.837  1.00 36.66    -0.520 N 
ATOM     65  HN  LYS A  11      36.408  42.621  55.552  1.00  0.00     0.248 HD
ATOM     66  CA  LYS A  11      36.819  42.605  53.450  1.00 33.31     0.227 C 
ATOM     67  HA  LYS A  11      37.476  42.007  52.777  1.00  0.00     0.000 H 
ATOM     68  C   LYS A  11      37.190  44.064  53.420  1.00 29.72     0.526 C 
ATOM     69  O   LYS A  11      36.903  44.729  54.406  1.00 31.69    -0.500 OA
ATOM     70  CB  LYS A  11      35.348  42.466  53.056  1.00 32.40     0.039 C 
ATOM     71  HB1 LYS A  11      34.762  43.337  53.433  1.00  0.00     0.000 H 
ATOM     72  HB2 LYS A  11      35.226  42.613  51.958  1.00  0.00     0.000 H 
ATOM     73  CG  LYS A  11      34.705  41.181  53.484  1.00 31.67     0.053 C 
ATOM     74  HG1 LYS A  11      33.654  41.139  53.115  1.00  0.00     0.000 H 
ATOM     75  HG2 LYS A  11      34.528  41.191  54.585  1.00  0.00     0.000 H 
ATOM     76  CD  LYS A  11      35.441  39.921  53.091  1.00 33.63     0.048 C 
ATOM     77  HD1 LYS A  11      35.394  39.141  53.886  1.00  0.00     0.000 H 
ATOM     78  HD2 LYS A  11      36.546  40.067  53.075  1.00  0.00     0.000 H 
ATOM     79  CE  LYS A  11      34.910  39.417  51.762  1.00 36.45     0.218 C 
ATOM     80  HE1 LYS A  11      35.204  40.079  50.914  1.00  0.00     0.000 H 
ATOM     81  HE2 LYS A  11      33.804  39.533  51.680  1.00  0.00     0.000 H 
ATOM     82  NZ  LYS A  11      35.333  38.042  51.556  1.00 39.05    -0.272 N 
ATOM     83  HZ1 LYS A  11      34.976  37.703  50.663  1.00  0.00     0.311 HD
ATOM     84  HZ2 LYS A  11      35.064  37.437  52.332  1.00  0.00     0.311 HD
ATOM     85  HZ3 LYS A  11      36.345  37.936  51.631  1.00  0.00     0.311 HD
ATOM     86  N   PRO A  12      37.815  44.675  52.420  1.00 26.99    -0.257 N 
ATOM     87  CA  PRO A  12      37.670  46.106  52.186  1.00 25.68     0.112 C 
ATOM     88  HA  PRO A  12      37.950  46.665  53.109  1.00  0.00     0.000 H 
ATOM     89  C   PRO A  12      36.211  46.432  51.808  1.00 24.03     0.526 C 
ATOM     90  O   PRO A  12      35.604  45.729  50.988  1.00 28.09    -0.500 OA
ATOM     91  CB  PRO A  12      38.721  46.369  51.085  1.00 26.10    -0.001 C 
ATOM     92  HB1 PRO A  12      38.282  46.458  50.064  1.00  0.00     0.000 H 
ATOM     93  HB2 PRO A  12      39.166  47.390  51.131  1.00  0.00     0.000 H 
ATOM     94  CG  PRO A  12      39.744  45.260  51.206  1.00 22.94     0.036 C 
ATOM     95  HG1 PRO A  12      40.414  45.119  50.326  1.00  0.00     0.000 H 
ATOM     96  HG2 PRO A  12      40.577  45.443  51.924  1.00  0.00     0.000 H 
ATOM     97  CD  PRO A  12      38.820  44.081  51.540  1.00 27.22     0.084 C 
ATOM     98  HD1 PRO A  12      39.341  43.192  51.967  1.00  0.00     0.000 H 
ATOM     99  HD2 PRO A  12      38.402  43.555  50.650  1.00  0.00     0.000 H 
ATOM    100  N   VAL A  13      35.608  47.418  52.454  1.00 21.61    -0.520 N 
ATOM    101  HN  VAL A  13      36.085  47.810  53.266  1.00  0.00     0.248 HD
ATOM    102  CA  VAL A  13      34.317  47.986  52.094  1.00 19.50     0.201 C 
ATOM    103  HA  VAL A  13      34.046  47.699  51.051  1.00  0.00     0.000 H 
ATOM    104  C   VAL A  13      34.551  49.465  52.182  1.00 18.39     0.526 C 
ATOM    105  O   VAL A  13      35.603  49.853  52.699  1.00 19.54    -0.500 OA
ATOM    106  CB  VAL A  13      33.097  47.799  53.037  1.00 20.38     0.033 C 
ATOM    107  HB  VAL A  13      32.409  48.669  52.924  1.00  0.00     0.000 H 
ATOM    108  CG1 VAL A  13      32.385  46.553  52.627  1.00 21.65     0.006 C 
ATOM    109 1HG1 VAL A  13      31.509  46.419  53.304  1.00  0.00     0.000 H 
ATOM    110 2HG1 VAL A  13      33.054  45.661  52.605  1.00  0.00     0.000 H 
ATOM    111 3HG1 VAL A  13      32.101  46.553  51.549  1.00  0.00     0.000 H 
ATOM    112  CG2 VAL A  13      33.485  47.662  54.476  1.00 20.14     0.006 C 
ATOM    113 1HG2 VAL A  13      32.609  47.528  55.153  1.00  0.00     0.000 H 
ATOM    114 2HG2 VAL A  13      34.112  48.524  54.803  1.00  0.00     0.000 H 
ATOM    115 3HG2 VAL A  13      34.223  46.838  54.612  1.00  0.00     0.000 H 
ATOM    116  N   ALA A  14      33.562  50.234  51.717  1.00 17.40    -0.520 N 
ATOM    117  HN  ALA A  14      32.787  49.749  51.264  1.00  0.00     0.248 HD
ATOM    118  CA  ALA A  14      33.465  51.686  51.784  1.00 17.15     0.215 C 
ATOM    119  HA  ALA A  14      33.732  52.038  52.808  1.00  0.00     0.000 H 
ATOM    120  C   ALA A  14      32.011  52.060  51.464  1.00 16.29     0.526 C 
ATOM    121  O   ALA A  14      31.342  51.341  50.711  1.00 22.23    -0.500 OA
ATOM    122  CB  ALA A  14      34.347  52.384  50.744  1.00 12.97     0.031 C 
ATOM    123  HB1 ALA A  14      34.273  53.495  50.795  1.00  0.00     0.000 H 
ATOM    124  HB2 ALA A  14      34.123  52.015  49.716  1.00  0.00     0.000 H 
ATOM    125  HB3 ALA A  14      35.407  52.049  50.828  1.00  0.00     0.000 H 
ATOM    126  N   HIS A  15      31.390  53.058  52.063  1.00 15.14    -0.520 N 
ATOM    127  HN  HIS A  15      31.831  53.495  52.872  1.00  0.00     0.248 HD
ATOM    128  CA  HIS A  15      30.091  53.564  51.611  1.00 15.01     0.195 C 
ATOM    129  HA  HIS A  15      29.997  53.487  50.503  1.00  0.00     0.000 H 
ATOM    130  C   HIS A  15      30.183  55.008  52.047  1.00 15.15     0.526 C 
ATOM    131  O   HIS A  15      29.982  55.260  53.226  1.00 13.55    -0.500 OA
ATOM    132  CB  HIS A  15      28.908  52.900  52.306  1.00 13.52     0.211 C 
ATOM    133  HB1 HIS A  15      28.978  51.790  52.221  1.00  0.00     0.000 H 
ATOM    134  HB2 HIS A  15      28.992  53.011  53.412  1.00  0.00     0.000 H 
ATOM    135  CG  HIS A  15      27.530  53.393  51.817  1.00 14.47     0.103 A 
ATOM    136  ND1 HIS A  15      26.521  52.618  51.405  1.00 16.61    -0.613 N 
ATOM    137  HD1 HIS A  15      26.550  51.602  51.315  1.00  0.00     0.478 HD
ATOM    138  CD2 HIS A  15      27.070  54.692  51.787  1.00 11.73     0.353 A 
ATOM    139  HD2 HIS A  15      27.628  55.604  52.056  1.00  0.00     0.000 H 
ATOM    140  CE1 HIS A  15      25.500  53.371  51.139  1.00 15.26     0.719 A 
ATOM    141  HE1 HIS A  15      24.516  53.027  50.778  1.00  0.00     0.000 H 
ATOM    142  NE2 HIS A  15      25.844  54.616  51.376  1.00 15.57    -0.686 N 
ATOM    143  HE2 HIS A  15      25.226  55.418  51.253  1.00  0.00     0.486 HD
ATOM    144  N   VAL A  16      30.565  55.883  51.126  1.00 14.92    -0.520 N 
ATOM    145  HN  VAL A  16      30.764  55.536  50.188  1.00  0.00     0.248 HD
ATOM    146  CA  VAL A  16      30.718  57.314  51.377  1.00 18.41     0.201 C 
ATOM    147  HA  VAL A  16      30.743  57.477  52.480  1.00  0.00     0.000 H 
ATOM    148  C   VAL A  16      29.544  58.085  50.806  1.00 15.74     0.526 C 
ATOM    149  O   VAL A  16      28.855  57.534  49.934  1.00 17.64    -0.500 OA
ATOM    150  CB  VAL A  16      32.065  57.854  50.763  1.00 21.61     0.033 C 
ATOM    151  HB  VAL A  16      32.260  58.879  51.156  1.00  0.00     0.000 H 
ATOM    152  CG1 VAL A  16      33.180  56.932  51.211  1.00 22.94     0.006 C 
ATOM    153 1HG1 VAL A  16      34.133  57.314  50.777  1.00  0.00     0.000 H 
ATOM    154 2HG1 VAL A  16      32.986  55.864  50.957  1.00  0.00     0.000 H 
ATOM    155 3HG1 VAL A  16      33.226  56.815  52.319  1.00  0.00     0.000 H 
ATOM    156  CG2 VAL A  16      32.058  57.898  49.242  1.00 25.48     0.006 C 
ATOM    157 1HG2 VAL A  16      33.011  58.280  48.808  1.00  0.00     0.000 H 
ATOM    158 2HG2 VAL A  16      31.188  58.486  48.867  1.00  0.00     0.000 H 
ATOM    159 3HG2 VAL A  16      31.802  56.899  48.818  1.00  0.00     0.000 H 
ATOM    160  N   VAL A  17      29.300  59.302  51.283  1.00 12.85    -0.520 N 
ATOM    161  HN  VAL A  17      29.957  59.685  51.963  1.00  0.00     0.248 HD
ATOM    162  CA  VAL A  17      28.147  60.136  50.898  1.00 16.77     0.201 C 
ATOM    163  HA  VAL A  17      27.650  59.647  50.028  1.00  0.00     0.000 H 
ATOM    164  C   VAL A  17      28.491  61.561  50.493  1.00 19.54     0.526 C 
ATOM    165  O   VAL A  17      29.534  62.099  50.856  1.00 21.62    -0.500 OA
ATOM    166  CB  VAL A  17      27.079  60.326  52.005  1.00 16.12     0.033 C 
ATOM    167  HB  VAL A  17      26.658  61.353  51.900  1.00  0.00     0.000 H 
ATOM    168  CG1 VAL A  17      25.948  59.331  51.760  1.00 15.95     0.006 C 
ATOM    169 1HG1 VAL A  17      25.482  59.407  50.750  1.00  0.00     0.000 H 
ATOM    170 2HG1 VAL A  17      25.171  59.420  52.555  1.00  0.00     0.000 H 
ATOM    171 3HG1 VAL A  17      26.297  58.289  51.951  1.00  0.00     0.000 H 
ATOM    172  CG2 VAL A  17      27.716  60.222  53.387  1.00 15.00     0.006 C 
ATOM    173 1HG2 VAL A  17      28.542  60.949  53.566  1.00  0.00     0.000 H 
ATOM    174 2HG2 VAL A  17      28.065  59.180  53.578  1.00  0.00     0.000 H 
ATOM    175 3HG2 VAL A  17      26.939  60.311  54.182  1.00  0.00     0.000 H 
ATOM    176  N   ALA A  18      27.582  62.192  49.758  1.00 19.08    -0.520 N 
ATOM    177  HN  ALA A  18      26.704  61.715  49.551  1.00  0.00     0.248 HD
ATOM    178  CA  ALA A  18      27.783  63.518  49.242  1.00 19.98     0.215 C 
ATOM    179  HA  ALA A  18      28.784  63.575  48.755  1.00  0.00     0.000 H 
ATOM    180  C   ALA A  18      27.703  64.557  50.338  1.00 24.70     0.526 C 
ATOM    181  O   ALA A  18      26.717  64.629  51.069  1.00 27.66    -0.500 OA
ATOM    182  CB  ALA A  18      26.733  63.834  48.240  1.00 14.88     0.031 C 
ATOM    183  HB1 ALA A  18      26.889  64.863  47.840  1.00  0.00     0.000 H 
ATOM    184  HB2 ALA A  18      25.706  63.696  48.652  1.00  0.00     0.000 H 
ATOM    185  HB3 ALA A  18      26.686  63.071  47.428  1.00  0.00     0.000 H 
ATOM    186  N   ASN A  19      28.736  65.369  50.511  1.00 26.98    -0.520 N 
ATOM    187  HN  ASN A  19      29.577  65.232  49.951  1.00  0.00     0.248 HD
ATOM    188  CA  ASN A  19      28.697  66.444  51.475  1.00 29.56     0.217 C 
ATOM    189  HA  ASN A  19      28.552  66.020  52.496  1.00  0.00     0.000 H 
ATOM    190  C   ASN A  19      27.568  67.410  51.167  1.00 31.18     0.526 C 
ATOM    191  O   ASN A  19      27.675  68.119  50.166  1.00 34.17    -0.500 OA
ATOM    192  CB  ASN A  19      29.968  67.225  51.440  1.00 31.69     0.003 C 
ATOM    193  HB1 ASN A  19      29.995  67.903  50.555  1.00  0.00     0.000 H 
ATOM    194  HB2 ASN A  19      30.833  66.567  51.191  1.00  0.00     0.000 H 
ATOM    195  CG  ASN A  19      30.223  67.991  52.713  1.00 30.14     0.675 C 
ATOM    196  OD1 ASN A  19      31.337  67.987  53.217  1.00 31.47    -0.470 OA
ATOM    197  ND2 ASN A  19      29.272  68.607  53.378  1.00 31.91    -0.867 N 
ATOM    198 1HD2 ASN A  19      28.343  68.610  52.958  1.00  0.00     0.344 HD
ATOM    199 2HD2 ASN A  19      29.445  69.125  54.239  1.00  0.00     0.344 HD
ATOM    200  N   PRO A  20      26.507  67.558  51.978  1.00 30.98    -0.257 N 
ATOM    201  CA  PRO A  20      25.362  68.355  51.594  1.00 32.11     0.112 C 
ATOM    202  HA  PRO A  20      25.069  68.069  50.557  1.00  0.00     0.000 H 
ATOM    203  C   PRO A  20      25.647  69.855  51.615  1.00 33.21     0.526 C 
ATOM    204  O   PRO A  20      24.921  70.657  51.032  1.00 34.35    -0.500 OA
ATOM    205  CB  PRO A  20      24.290  67.863  52.544  1.00 29.61    -0.001 C 
ATOM    206  HB1 PRO A  20      23.426  68.555  52.676  1.00  0.00     0.000 H 
ATOM    207  HB2 PRO A  20      23.685  67.006  52.166  1.00  0.00     0.000 H 
ATOM    208  CG  PRO A  20      25.072  67.583  53.794  1.00 30.40     0.036 C 
ATOM    209  HG1 PRO A  20      25.268  68.476  54.432  1.00  0.00     0.000 H 
ATOM    210  HG2 PRO A  20      24.518  67.010  54.573  1.00  0.00     0.000 H 
ATOM    211  CD  PRO A  20      26.309  66.899  53.266  1.00 30.32     0.084 C 
ATOM    212  HD1 PRO A  20      26.246  65.787  53.219  1.00  0.00     0.000 H 
ATOM    213  HD2 PRO A  20      27.190  66.929  53.949  1.00  0.00     0.000 H 
ATOM    214  N   GLN A  21      26.714  70.256  52.307  1.00 35.27    -0.520 N 
ATOM    215  HN  GLN A  21      27.252  69.562  52.826  1.00  0.00     0.248 HD
ATOM    216  CA  GLN A  21      27.136  71.638  52.348  1.00 35.92     0.210 C 
ATOM    217  HA  GLN A  21      26.370  72.311  51.896  1.00  0.00     0.000 H 
ATOM    218  C   GLN A  21      28.384  71.574  51.498  1.00 34.52     0.526 C 
ATOM    219  O   GLN A  21      29.438  71.299  52.071  1.00 34.80    -0.500 OA
ATOM    220  CB  GLN A  21      27.506  72.086  53.769  1.00 38.47     0.053 C 
ATOM    221  HB1 GLN A  21      26.654  71.956  54.477  1.00  0.00     0.000 H 
ATOM    222  HB2 GLN A  21      28.231  71.386  54.246  1.00  0.00     0.000 H 
ATOM    223  CG  GLN A  21      28.033  73.543  53.770  1.00 44.40    -0.043 C 
ATOM    224  HG1 GLN A  21      27.174  74.239  53.627  1.00  0.00     0.000 H 
ATOM    225  HG2 GLN A  21      28.611  73.720  52.833  1.00  0.00     0.000 H 
ATOM    226  CD  GLN A  21      28.870  74.022  54.972  1.00 47.92     0.675 C 
ATOM    227  OE1 GLN A  21      29.225  75.204  55.083  1.00 48.53    -0.470 OA
ATOM    228  NE2 GLN A  21      29.243  73.173  55.929  1.00 49.44    -0.867 N 
ATOM    229 1HE2 GLN A  21      29.797  73.490  56.725  1.00  0.00     0.344 HD
ATOM    230 2HE2 GLN A  21      28.951  72.200  55.838  1.00  0.00     0.344 HD
ATOM    231  N   ALA A  22      28.237  71.643  50.172  1.00 33.19    -0.520 N 
ATOM    232  HN  ALA A  22      27.283  71.626  49.811  1.00  0.00     0.248 HD
ATOM    233  CA  ALA A  22      29.323  71.741  49.182  1.00 32.62     0.215 C 
ATOM    234  HA  ALA A  22      30.043  72.532  49.497  1.00  0.00     0.000 H 
ATOM    235  C   ALA A  22      28.656  72.151  47.861  1.00 32.85     0.526 C 
ATOM    236  O   ALA A  22      27.941  71.509  47.091  1.00 29.76    -0.500 OA
ATOM    237  CB  ALA A  22      30.080  70.420  48.947  1.00 32.26     0.031 C 
ATOM    238  HB1 ALA A  22      30.902  70.494  48.198  1.00  0.00     0.000 H 
ATOM    239  HB2 ALA A  22      29.370  69.607  48.669  1.00  0.00     0.000 H 
ATOM    240  HB3 ALA A  22      30.465  70.013  49.911  1.00  0.00     0.000 H 
ATOM    241  N   GLU A  23      28.807  73.448  47.743  1.00 35.51    -0.520 N 
ATOM    242  HN  GLU A  23      29.354  73.939  48.450  1.00  0.00     0.248 HD
ATOM    243  CA  GLU A  23      28.242  74.207  46.670  1.00 34.85     0.246 C 
ATOM    244  HA  GLU A  23      27.158  73.962  46.577  1.00  0.00     0.000 H 
ATOM    245  C   GLU A  23      28.951  73.833  45.386  1.00 33.80     0.526 C 
ATOM    246  O   GLU A  23      30.183  73.943  45.298  1.00 35.71    -0.500 OA
ATOM    247  CB  GLU A  23      28.396  75.695  47.033  1.00 37.38     0.000 C 
ATOM    248  HB1 GLU A  23      27.824  75.903  47.967  1.00  0.00     0.000 H 
ATOM    249  HB2 GLU A  23      27.830  76.311  46.295  1.00  0.00     0.000 H 
ATOM    250  CG  GLU A  23      29.806  76.259  47.176  1.00 39.33    -0.208 C 
ATOM    251  HG1 GLU A  23      30.515  75.459  47.493  1.00  0.00     0.000 H 
ATOM    252  HG2 GLU A  23      29.868  76.931  48.063  1.00  0.00     0.000 H 
ATOM    253  CD  GLU A  23      30.332  76.976  45.922  1.00 44.02     0.620 C 
ATOM    254  OE1 GLU A  23      31.532  77.244  45.898  1.00 48.17    -0.706 OA
ATOM    255  OE2 GLU A  23      29.590  77.302  44.978  1.00 44.13    -0.706 OA
ATOM    256  N   GLY A  24      28.132  73.200  44.531  1.00 31.92    -0.520 N 
ATOM    257  HN  GLY A  24      27.212  72.918  44.870  1.00  0.00     0.248 HD
ATOM    258  CA  GLY A  24      28.479  72.887  43.135  1.00 26.01     0.246 C 
ATOM    259  HA1 GLY A  24      28.686  73.838  42.591  1.00  0.00     0.000 H 
ATOM    260  HA2 GLY A  24      27.564  72.531  42.606  1.00  0.00     0.000 H 
ATOM    261  C   GLY A  24      29.616  71.909  42.870  1.00 25.25     0.526 C 
ATOM    262  O   GLY A  24      30.474  72.144  42.021  1.00 23.85    -0.500 OA
ATOM    263  N   GLN A  25      29.627  70.755  43.516  1.00 23.41    -0.520 N 
ATOM    264  HN  GLN A  25      28.863  70.521  44.150  1.00  0.00     0.248 HD
ATOM    265  CA  GLN A  25      30.721  69.819  43.327  1.00 27.35     0.210 C 
ATOM    266  HA  GLN A  25      30.910  69.684  42.236  1.00  0.00     0.000 H 
ATOM    267  C   GLN A  25      30.283  68.482  43.939  1.00 24.58     0.526 C 
ATOM    268  O   GLN A  25      29.529  68.502  44.906  1.00 25.17    -0.500 OA
ATOM    269  CB  GLN A  25      32.012  70.437  44.015  1.00 31.76     0.053 C 
ATOM    270  HB1 GLN A  25      32.391  71.296  43.413  1.00  0.00     0.000 H 
ATOM    271  HB2 GLN A  25      31.728  70.964  44.955  1.00  0.00     0.000 H 
ATOM    272  CG  GLN A  25      33.164  69.436  44.295  1.00 37.97    -0.043 C 
ATOM    273  HG1 GLN A  25      32.717  68.479  44.653  1.00  0.00     0.000 H 
ATOM    274  HG2 GLN A  25      33.605  69.127  43.319  1.00  0.00     0.000 H 
ATOM    275  CD  GLN A  25      34.315  69.819  45.247  1.00 38.59     0.675 C 
ATOM    276  OE1 GLN A  25      35.300  69.080  45.390  1.00 37.64    -0.470 OA
ATOM    277  NE2 GLN A  25      34.290  70.949  45.932  1.00 40.91    -0.867 N 
ATOM    278 1HE2 GLN A  25      35.051  71.202  46.562  1.00  0.00     0.344 HD
ATOM    279 2HE2 GLN A  25      33.480  71.557  45.814  1.00  0.00     0.344 HD
ATOM    280  N   LEU A  26      30.589  67.288  43.423  1.00 22.66    -0.520 N 
ATOM    281  HN  LEU A  26      31.054  67.221  42.518  1.00  0.00     0.248 HD
ATOM    282  CA  LEU A  26      30.251  66.086  44.168  1.00 18.95     0.204 C 
ATOM    283  HA  LEU A  26      29.425  66.285  44.890  1.00  0.00     0.000 H 
ATOM    284  C   LEU A  26      31.556  65.846  44.895  1.00 19.93     0.526 C 
ATOM    285  O   LEU A  26      32.664  65.876  44.347  1.00 21.46    -0.500 OA
ATOM    286  CB  LEU A  26      29.915  64.900  43.273  1.00 16.35     0.016 C 
ATOM    287  HB1 LEU A  26      29.160  65.239  42.526  1.00  0.00     0.000 H 
ATOM    288  HB2 LEU A  26      30.802  64.696  42.629  1.00  0.00     0.000 H 
ATOM    289  CG  LEU A  26      29.431  63.548  43.858  1.00 17.85     0.054 C 
ATOM    290  HG  LEU A  26      30.314  62.999  44.261  1.00  0.00     0.000 H 
ATOM    291  CD1 LEU A  26      28.380  63.670  44.971  1.00 12.55    -0.014 C 
ATOM    292 1HD1 LEU A  26      28.783  64.237  45.843  1.00  0.00     0.000 H 
ATOM    293 2HD1 LEU A  26      27.987  62.672  45.276  1.00  0.00     0.000 H 
ATOM    294 3HD1 LEU A  26      27.432  64.118  44.593  1.00  0.00     0.000 H 
ATOM    295  CD2 LEU A  26      28.878  62.770  42.661  1.00 16.95    -0.014 C 
ATOM    296 1HD2 LEU A  26      29.641  62.681  41.853  1.00  0.00     0.000 H 
ATOM    297 2HD2 LEU A  26      27.930  63.218  42.283  1.00  0.00     0.000 H 
ATOM    298 3HD2 LEU A  26      28.485  61.772  42.966  1.00  0.00     0.000 H 
ATOM    299  N   GLN A  27      31.342  65.831  46.187  1.00 18.54    -0.520 N 
ATOM    300  HN  GLN A  27      30.383  65.915  46.524  1.00  0.00     0.248 HD
ATOM    301  CA  GLN A  27      32.400  65.702  47.149  1.00 22.02     0.210 C 
ATOM    302  HA  GLN A  27      33.350  65.392  46.654  1.00  0.00     0.000 H 
ATOM    303  C   GLN A  27      31.932  64.645  48.120  1.00 23.10     0.526 C 
ATOM    304  O   GLN A  27      30.808  64.729  48.659  1.00 22.54    -0.500 OA
ATOM    305  CB  GLN A  27      32.569  67.005  47.845  1.00 21.16     0.053 C 
ATOM    306  HB1 GLN A  27      31.838  67.117  48.679  1.00  0.00     0.000 H 
ATOM    307  HB2 GLN A  27      32.234  67.853  47.204  1.00  0.00     0.000 H 
ATOM    308  CG  GLN A  27      33.972  67.205  48.322  1.00 23.99    -0.043 C 
ATOM    309  HG1 GLN A  27      34.709  67.347  47.497  1.00  0.00     0.000 H 
ATOM    310  HG2 GLN A  27      34.432  66.286  48.754  1.00  0.00     0.000 H 
ATOM    311  CD  GLN A  27      33.913  68.364  49.287  1.00 28.46     0.675 C 
ATOM    312  OE1 GLN A  27      33.748  69.526  48.885  1.00 31.39    -0.470 OA
ATOM    313  NE2 GLN A  27      33.956  68.061  50.590  1.00 27.65    -0.867 N 
ATOM    314 1HE2 GLN A  27      33.916  68.844  51.242  1.00  0.00     0.344 HD
ATOM    315 2HE2 GLN A  27      34.092  67.106  50.921  1.00  0.00     0.344 HD
ATOM    316  N   TRP A  28      32.770  63.625  48.272  1.00 21.53    -0.520 N 
ATOM    317  HN  TRP A  28      33.660  63.608  47.775  1.00  0.00     0.248 HD
ATOM    318  CA  TRP A  28      32.399  62.536  49.156  1.00 24.26     0.248 C 
ATOM    319  HA  TRP A  28      31.301  62.373  49.053  1.00  0.00     0.000 H 
ATOM    320  C   TRP A  28      32.691  62.806  50.614  1.00 26.64     0.526 C 
ATOM    321  O   TRP A  28      33.332  63.806  50.947  1.00 29.80    -0.500 OA
ATOM    322  CB  TRP A  28      33.092  61.284  48.710  1.00 22.48     0.020 C 
ATOM    323  HB1 TRP A  28      33.006  60.455  49.450  1.00  0.00     0.000 H 
ATOM    324  HB2 TRP A  28      34.203  61.377  48.721  1.00  0.00     0.000 H 
ATOM    325  CG  TRP A  28      32.548  60.914  47.348  1.00 21.19     0.046 A 
ATOM    326  CD1 TRP A  28      33.401  60.826  46.286  1.00 20.89     0.117 A 
ATOM    327  HD1 TRP A  28      34.498  60.943  46.290  1.00  0.00     0.000 H 
ATOM    328  CD2 TRP A  28      31.232  60.696  47.024  1.00 21.11    -0.275 A 
ATOM    329  NE1 TRP A  28      32.636  60.575  45.273  1.00 18.13    -0.330 N 
ATOM    330  HE1 TRP A  28      32.967  60.464  44.314  1.00  0.00     0.294 HD
ATOM    331  CE2 TRP A  28      31.341  60.479  45.651  1.00 21.52     0.000 A 
ATOM    332  CE3 TRP A  28      30.003  60.652  47.651  1.00 20.70     0.145 A 
ATOM    333  HE3 TRP A  28      29.920  60.823  48.738  1.00  0.00     0.000 H 
ATOM    334  CZ2 TRP A  28      30.219  60.209  44.879  1.00 19.27     0.029 A 
ATOM    335  HZ2 TRP A  28      30.301  60.029  43.794  1.00  0.00     0.000 H 
ATOM    336  CZ3 TRP A  28      28.883  60.391  46.896  1.00 22.28    -0.082 A 
ATOM    337  HZ3 TRP A  28      27.892  60.353  47.379  1.00  0.00     0.000 H 
ATOM    338  CH2 TRP A  28      28.996  60.174  45.520  1.00 23.65     0.034 A 
ATOM    339  HH2 TRP A  28      28.086  59.970  44.931  1.00  0.00     0.000 H 
ATOM    340  N   LEU A  29      32.196  61.912  51.470  1.00 30.47    -0.520 N 
ATOM    341  HN  LEU A  29      31.778  61.065  51.085  1.00  0.00     0.248 HD
ATOM    342  CA  LEU A  29      32.212  62.064  52.927  1.00 32.94     0.204 C 
ATOM    343  HA  LEU A  29      33.162  62.547  53.256  1.00  0.00     0.000 H 
ATOM    344  C   LEU A  29      32.065  60.695  53.570  1.00 36.83     0.526 C 
ATOM    345  O   LEU A  29      31.418  59.843  52.964  1.00 37.74    -0.500 OA
ATOM    346  CB  LEU A  29      31.013  62.880  53.396  1.00 30.36     0.016 C 
ATOM    347  HB1 LEU A  29      30.314  62.179  53.909  1.00  0.00     0.000 H 
ATOM    348  HB2 LEU A  29      30.435  63.173  52.489  1.00  0.00     0.000 H 
ATOM    349  CG  LEU A  29      31.134  64.073  54.241  1.00 25.77     0.054 C 
ATOM    350  HG  LEU A  29      31.655  63.802  55.189  1.00  0.00     0.000 H 
ATOM    351  CD1 LEU A  29      31.936  65.099  53.513  1.00 26.01    -0.014 C 
ATOM    352 1HD1 LEU A  29      32.028  66.006  54.155  1.00  0.00     0.000 H 
ATOM    353 2HD1 LEU A  29      31.517  65.331  52.506  1.00  0.00     0.000 H 
ATOM    354 3HD1 LEU A  29      32.927  64.709  53.182  1.00  0.00     0.000 H 
ATOM    355  CD2 LEU A  29      29.753  64.572  54.559  1.00 28.52    -0.014 C 
ATOM    356 1HD2 LEU A  29      29.845  65.479  55.201  1.00  0.00     0.000 H 
ATOM    357 2HD2 LEU A  29      29.108  63.786  55.017  1.00  0.00     0.000 H 
ATOM    358 3HD2 LEU A  29      29.142  64.755  53.644  1.00  0.00     0.000 H 
ATOM    359  N   ASN A  30      32.590  60.375  54.751  1.00 43.17    -0.520 N 
ATOM    360  HN  ASN A  30      33.245  61.008  55.211  1.00  0.00     0.248 HD
ATOM    361  CA  ASN A  30      32.221  59.107  55.386  1.00 47.00     0.217 C 
ATOM    362  HA  ASN A  30      31.364  58.652  54.837  1.00  0.00     0.000 H 
ATOM    363  C   ASN A  30      31.769  59.513  56.790  1.00 47.64     0.526 C 
ATOM    364  O   ASN A  30      30.983  60.454  56.797  1.00 48.92    -0.500 OA
ATOM    365  CB  ASN A  30      33.406  58.116  55.401  1.00 48.42     0.003 C 
ATOM    366  HB1 ASN A  30      33.166  57.222  56.022  1.00  0.00     0.000 H 
ATOM    367  HB2 ASN A  30      33.523  57.624  54.407  1.00  0.00     0.000 H 
ATOM    368  CG  ASN A  30      34.702  58.743  55.844  1.00 50.78     0.675 C 
ATOM    369  OD1 ASN A  30      34.807  59.265  56.948  1.00 53.49    -0.470 OA
ATOM    370  ND2 ASN A  30      35.709  58.760  54.985  1.00 51.77    -0.867 N 
ATOM    371 1HD2 ASN A  30      35.622  58.326  54.066  1.00  0.00     0.344 HD
ATOM    372 2HD2 ASN A  30      36.587  59.185  55.285  1.00  0.00     0.344 HD
ATOM    373  N   ARG A  31      32.080  58.976  57.965  1.00 49.82    -0.520 N 
ATOM    374  HN  ARG A  31      32.740  58.199  57.948  1.00  0.00     0.248 HD
ATOM    375  CA  ARG A  31      31.572  59.383  59.302  1.00 54.96     0.237 C 
ATOM    376  HA  ARG A  31      32.051  58.699  60.040  1.00  0.00     0.000 H 
ATOM    377  C   ARG A  31      30.061  59.315  59.569  1.00 55.30     0.526 C 
ATOM    378  O   ARG A  31      29.680  59.080  60.720  1.00 55.18    -0.500 OA
ATOM    379  CB  ARG A  31      31.996  60.833  59.708  1.00 55.55     0.049 C 
ATOM    380  HB1 ARG A  31      33.048  61.004  59.382  1.00  0.00     0.000 H 
ATOM    381  HB2 ARG A  31      32.102  60.879  60.817  1.00  0.00     0.000 H 
ATOM    382  CG  ARG A  31      31.132  62.024  59.242  1.00 58.05     0.058 C 
ATOM    383  HG1 ARG A  31      30.318  62.252  59.969  1.00  0.00     0.000 H 
ATOM    384  HG2 ARG A  31      30.502  61.757  58.362  1.00  0.00     0.000 H 
ATOM    385  CD  ARG A  31      31.993  63.238  58.967  1.00 58.87     0.111 C 
ATOM    386  HD1 ARG A  31      32.367  63.704  59.909  1.00  0.00     0.000 H 
ATOM    387  HD2 ARG A  31      31.391  64.096  58.586  1.00  0.00     0.000 H 
ATOM    388  NE  ARG A  31      33.081  62.895  58.063  1.00 61.77    -0.493 N 
ATOM    389  HE  ARG A  31      33.121  61.957  57.664  1.00  0.00     0.294 HD
ATOM    390  CZ  ARG A  31      34.031  63.784  57.744  1.00 64.08     0.814 C 
ATOM    391  NH1 ARG A  31      35.026  63.396  56.931  1.00 62.80    -0.634 N 
ATOM    392 1HH1 ARG A  31      35.749  64.073  56.688  1.00  0.00     0.361 HD
ATOM    393 2HH1 ARG A  31      35.064  62.435  56.592  1.00  0.00     0.361 HD
ATOM    394  NH2 ARG A  31      33.980  65.058  58.194  1.00 64.51    -0.634 N 
ATOM    395 1HH2 ARG A  31      34.703  65.735  57.951  1.00  0.00     0.361 HD
ATOM    396 2HH2 ARG A  31      33.224  65.353  58.812  1.00  0.00     0.361 HD
ATOM    397  N   ARG A  32      29.213  59.561  58.549  1.00 54.64    -0.520 N 
ATOM    398  HN  ARG A  32      29.636  59.779  57.647  1.00  0.00     0.248 HD
ATOM    399  CA  ARG A  32      27.765  59.548  58.600  1.00 52.37     0.237 C 
ATOM    400  HA  ARG A  32      27.438  60.255  59.398  1.00  0.00     0.000 H 
ATOM    401  C   ARG A  32      27.159  58.179  58.897  1.00 50.97     0.526 C 
ATOM    402  O   ARG A  32      27.846  57.237  59.294  1.00 50.23    -0.500 OA
ATOM    403  CB  ARG A  32      27.256  60.066  57.268  1.00 50.95     0.049 C 
ATOM    404  HB1 ARG A  32      27.025  59.256  56.538  1.00  0.00     0.000 H 
ATOM    405  HB2 ARG A  32      28.041  60.577  56.663  1.00  0.00     0.000 H 
ATOM    406  CG  ARG A  32      26.076  60.945  57.576  1.00 53.11     0.058 C 
ATOM    407  HG1 ARG A  32      25.644  60.680  58.569  1.00  0.00     0.000 H 
ATOM    408  HG2 ARG A  32      26.413  61.987  57.785  1.00  0.00     0.000 H 
ATOM    409  CD  ARG A  32      25.000  60.945  56.521  1.00 53.15     0.111 C 
ATOM    410  HD1 ARG A  32      24.790  59.920  56.134  1.00  0.00     0.000 H 
ATOM    411  HD2 ARG A  32      23.993  61.165  56.947  1.00  0.00     0.000 H 
ATOM    412  NE  ARG A  32      25.355  61.857  55.472  1.00 53.46    -0.493 N 
ATOM    413  HE  ARG A  32      26.231  61.678  54.980  1.00  0.00     0.294 HD
ATOM    414  CZ  ARG A  32      24.652  62.909  55.083  1.00 53.31     0.814 C 
ATOM    415  NH1 ARG A  32      25.132  63.611  54.060  1.00 55.38    -0.634 N 
ATOM    416 1HH1 ARG A  32      26.004  63.320  53.619  1.00  0.00     0.361 HD
ATOM    417 2HH1 ARG A  32      24.590  64.422  53.760  1.00  0.00     0.361 HD
ATOM    418  NH2 ARG A  32      23.523  63.286  55.654  1.00 49.48    -0.634 N 
ATOM    419 1HH2 ARG A  32      23.155  62.748  56.438  1.00  0.00     0.361 HD
ATOM    420 2HH2 ARG A  32      22.981  64.097  55.354  1.00  0.00     0.361 HD
ATOM    421  N   ALA A  33      25.867  58.046  58.624  1.00 49.92    -0.520 N 
ATOM    422  HN  ALA A  33      25.372  58.835  58.209  1.00  0.00     0.248 HD
ATOM    423  CA  ALA A  33      25.138  56.843  58.887  1.00 53.01     0.215 C 
ATOM    424  HA  ALA A  33      24.863  56.865  59.967  1.00  0.00     0.000 H 
ATOM    425  C   ALA A  33      25.797  55.495  58.631  1.00 55.12     0.526 C 
ATOM    426  O   ALA A  33      26.086  54.706  59.542  1.00 56.64    -0.500 OA
ATOM    427  CB  ALA A  33      23.838  56.887  58.106  1.00 53.63     0.031 C 
ATOM    428  HB1 ALA A  33      23.270  55.950  58.311  1.00  0.00     0.000 H 
ATOM    429  HB2 ALA A  33      23.999  57.060  57.016  1.00  0.00     0.000 H 
ATOM    430  HB3 ALA A  33      23.241  57.804  58.320  1.00  0.00     0.000 H 
ATOM    431  N   ASN A  34      26.019  55.227  57.354  1.00 54.60    -0.520 N 
ATOM    432  HN  ASN A  34      25.754  55.906  56.640  1.00  0.00     0.248 HD
ATOM    433  CA  ASN A  34      26.636  53.976  56.964  1.00 53.71     0.217 C 
ATOM    434  HA  ASN A  34      27.079  53.440  57.835  1.00  0.00     0.000 H 
ATOM    435  C   ASN A  34      27.679  54.519  56.055  1.00 51.32     0.526 C 
ATOM    436  O   ASN A  34      27.590  54.480  54.819  1.00 51.25    -0.500 OA
ATOM    437  CB  ASN A  34      25.674  53.106  56.195  1.00 56.05     0.003 C 
ATOM    438  HB1 ASN A  34      25.045  53.699  55.491  1.00  0.00     0.000 H 
ATOM    439  HB2 ASN A  34      26.196  52.465  55.446  1.00  0.00     0.000 H 
ATOM    440  CG  ASN A  34      24.841  52.294  57.152  1.00 57.85     0.675 C 
ATOM    441  OD1 ASN A  34      25.282  51.252  57.644  1.00 58.19    -0.470 OA
ATOM    442  ND2 ASN A  34      23.611  52.757  57.393  1.00 57.98    -0.867 N 
ATOM    443 1HD2 ASN A  34      23.047  52.207  58.041  1.00  0.00     0.344 HD
ATOM    444 2HD2 ASN A  34      23.246  53.618  56.986  1.00  0.00     0.344 HD
ATOM    445  N   ALA A  35      28.577  55.201  56.727  1.00 48.07    -0.520 N 
ATOM    446  HN  ALA A  35      28.550  55.275  57.744  1.00  0.00     0.248 HD
ATOM    447  CA  ALA A  35      29.590  55.831  55.951  1.00 47.43     0.215 C 
ATOM    448  HA  ALA A  35      29.394  55.645  54.869  1.00  0.00     0.000 H 
ATOM    449  C   ALA A  35      30.916  55.194  56.338  1.00 46.77     0.526 C 
ATOM    450  O   ALA A  35      31.735  55.677  57.147  1.00 47.25    -0.500 OA
ATOM    451  CB  ALA A  35      29.473  57.308  56.231  1.00 45.10     0.031 C 
ATOM    452  HB1 ALA A  35      30.267  57.802  55.623  1.00  0.00     0.000 H 
ATOM    453  HB2 ALA A  35      29.524  57.560  57.316  1.00  0.00     0.000 H 
ATOM    454  HB3 ALA A  35      28.452  57.716  56.044  1.00  0.00     0.000 H 
ATOM    455  N   LEU A  36      31.021  54.007  55.718  1.00 42.77    -0.520 N 
ATOM    456  HN  LEU A  36      30.320  53.742  55.026  1.00  0.00     0.248 HD
ATOM    457  CA  LEU A  36      32.108  53.095  56.010  1.00 37.92     0.204 C 
ATOM    458  HA  LEU A  36      32.334  53.160  57.100  1.00  0.00     0.000 H 
ATOM    459  C   LEU A  36      33.367  53.392  55.253  1.00 35.46     0.526 C 
ATOM    460  O   LEU A  36      33.309  53.772  54.082  1.00 36.94    -0.500 OA
ATOM    461  CB  LEU A  36      31.766  51.643  55.680  1.00 35.87     0.016 C 
ATOM    462  HB1 LEU A  36      31.377  51.593  54.636  1.00  0.00     0.000 H 
ATOM    463  HB2 LEU A  36      32.714  51.063  55.587  1.00  0.00     0.000 H 
ATOM    464  CG  LEU A  36      30.817  50.887  56.592  1.00 36.51     0.054 C 
ATOM    465  HG  LEU A  36      30.886  51.324  57.615  1.00  0.00     0.000 H 
ATOM    466  CD1 LEU A  36      29.365  50.997  56.113  1.00 33.66    -0.014 C 
ATOM    467 1HD1 LEU A  36      28.668  50.442  56.783  1.00  0.00     0.000 H 
ATOM    468 2HD1 LEU A  36      29.260  50.667  55.053  1.00  0.00     0.000 H 
ATOM    469 3HD1 LEU A  36      29.055  52.061  55.995  1.00  0.00     0.000 H 
ATOM    470  CD2 LEU A  36      31.304  49.443  56.648  1.00 35.35    -0.014 C 
ATOM    471 1HD2 LEU A  36      30.607  48.888  57.318  1.00  0.00     0.000 H 
ATOM    472 2HD2 LEU A  36      32.372  49.353  56.957  1.00  0.00     0.000 H 
ATOM    473 3HD2 LEU A  36      31.407  48.977  55.640  1.00  0.00     0.000 H 
ATOM    474  N   LEU A  37      34.488  53.242  55.931  1.00 32.05    -0.520 N 
ATOM    475  HN  LEU A  37      34.445  53.144  56.945  1.00  0.00     0.248 HD
ATOM    476  CA  LEU A  37      35.792  53.212  55.268  1.00 30.74     0.204 C 
ATOM    477  HA  LEU A  37      35.738  52.850  54.215  1.00  0.00     0.000 H 
ATOM    478  C   LEU A  37      36.322  52.186  56.211  1.00 29.22     0.526 C 
ATOM    479  O   LEU A  37      36.319  52.417  57.425  1.00 31.28    -0.500 OA
ATOM    480  CB  LEU A  37      36.687  54.431  55.434  1.00 29.41     0.016 C 
ATOM    481  HB1 LEU A  37      37.523  54.177  56.127  1.00  0.00     0.000 H 
ATOM    482  HB2 LEU A  37      36.144  55.203  56.028  1.00  0.00     0.000 H 
ATOM    483  CG  LEU A  37      37.258  55.078  54.188  1.00 29.27     0.054 C 
ATOM    484  HG  LEU A  37      37.738  54.304  53.544  1.00  0.00     0.000 H 
ATOM    485  CD1 LEU A  37      36.170  55.805  53.403  1.00 29.15    -0.014 C 
ATOM    486 1HD1 LEU A  37      36.590  56.281  52.486  1.00  0.00     0.000 H 
ATOM    487 2HD1 LEU A  37      35.628  56.543  54.039  1.00  0.00     0.000 H 
ATOM    488 3HD1 LEU A  37      35.316  55.130  53.162  1.00  0.00     0.000 H 
ATOM    489  CD2 LEU A  37      38.280  56.113  54.596  1.00 28.92    -0.014 C 
ATOM    490 1HD2 LEU A  37      38.700  56.589  53.679  1.00  0.00     0.000 H 
ATOM    491 2HD2 LEU A  37      39.073  55.690  55.256  1.00  0.00     0.000 H 
ATOM    492 3HD2 LEU A  37      37.865  56.861  55.311  1.00  0.00     0.000 H 
ATOM    493  N   ALA A  38      36.611  51.022  55.649  1.00 29.86    -0.520 N 
ATOM    494  HN  ALA A  38      36.480  50.919  54.643  1.00  0.00     0.248 HD
ATOM    495  CA  ALA A  38      37.101  49.900  56.398  1.00 26.54     0.215 C 
ATOM    496  HA  ALA A  38      37.130  50.201  57.471  1.00  0.00     0.000 H 
ATOM    497  C   ALA A  38      38.504  49.440  56.013  1.00 26.52     0.526 C 
ATOM    498  O   ALA A  38      39.414  50.265  55.850  1.00 28.92    -0.500 OA
ATOM    499  CB  ALA A  38      36.068  48.763  56.265  1.00 29.06     0.031 C 
ATOM    500  HB1 ALA A  38      36.449  47.891  56.847  1.00  0.00     0.000 H 
ATOM    501  HB2 ALA A  38      35.837  48.509  55.204  1.00  0.00     0.000 H 
ATOM    502  HB3 ALA A  38      35.041  49.072  56.569  1.00  0.00     0.000 H 
ATOM    503  N   ASN A  39      38.705  48.152  55.788  1.00 24.56    -0.520 N 
ATOM    504  HN  ASN A  39      37.890  47.561  55.628  1.00  0.00     0.248 HD
ATOM    505  CA  ASN A  39      40.013  47.531  55.755  1.00 22.91     0.217 C 
ATOM    506  HA  ASN A  39      40.526  47.788  56.711  1.00  0.00     0.000 H 
ATOM    507  C   ASN A  39      40.925  47.976  54.618  1.00 25.44     0.526 C 
ATOM    508  O   ASN A  39      41.083  47.294  53.585  1.00 27.15    -0.500 OA
ATOM    509  CB  ASN A  39      39.825  45.977  55.730  1.00 23.29     0.003 C 
ATOM    510  HB1 ASN A  39      39.681  45.641  54.677  1.00  0.00     0.000 H 
ATOM    511  HB2 ASN A  39      40.795  45.486  55.977  1.00  0.00     0.000 H 
ATOM    512  CG  ASN A  39      38.707  45.373  56.615  1.00 23.36     0.675 C 
ATOM    513  OD1 ASN A  39      37.711  46.033  56.896  1.00 22.72    -0.470 OA
ATOM    514  ND2 ASN A  39      38.707  44.139  57.075  1.00 18.97    -0.867 N 
ATOM    515 1HD2 ASN A  39      39.535  43.591  56.841  1.00  0.00     0.344 HD
ATOM    516 2HD2 ASN A  39      37.971  43.741  57.658  1.00  0.00     0.344 HD
ATOM    517  N   GLY A  40      41.511  49.163  54.753  1.00 23.38    -0.520 N 
ATOM    518  HN  GLY A  40      41.242  49.786  55.514  1.00  0.00     0.248 HD
ATOM    519  CA  GLY A  40      42.540  49.564  53.804  1.00 27.47     0.246 C 
ATOM    520  HA1 GLY A  40      43.382  50.053  54.347  1.00  0.00     0.000 H 
ATOM    521  HA2 GLY A  40      43.055  48.660  53.404  1.00  0.00     0.000 H 
ATOM    522  C   GLY A  40      42.092  50.446  52.656  1.00 27.86     0.526 C 
ATOM    523  O   GLY A  40      42.889  50.864  51.807  1.00 26.24    -0.500 OA
ATOM    524  N   VAL A  41      40.788  50.674  52.616  1.00 27.79    -0.520 N 
ATOM    525  HN  VAL A  41      40.178  50.216  53.293  1.00  0.00     0.248 HD
ATOM    526  CA  VAL A  41      40.220  51.553  51.637  1.00 23.75     0.201 C 
ATOM    527  HA  VAL A  41      40.751  51.467  50.660  1.00  0.00     0.000 H 
ATOM    528  C   VAL A  41      40.477  52.891  52.282  1.00 22.85     0.526 C 
ATOM    529  O   VAL A  41      40.219  53.108  53.456  1.00 23.30    -0.500 OA
ATOM    530  CB  VAL A  41      38.754  51.248  51.489  1.00 22.85     0.033 C 
ATOM    531  HB  VAL A  41      38.259  51.259  52.488  1.00  0.00     0.000 H 
ATOM    532  CG1 VAL A  41      38.056  52.213  50.555  1.00 27.69     0.006 C 
ATOM    533 1HG1 VAL A  41      38.133  53.229  51.008  1.00  0.00     0.000 H 
ATOM    534 2HG1 VAL A  41      37.006  51.916  50.327  1.00  0.00     0.000 H 
ATOM    535 3HG1 VAL A  41      38.448  52.170  49.512  1.00  0.00     0.000 H 
ATOM    536  CG2 VAL A  41      38.650  49.881  50.879  1.00 22.40     0.006 C 
ATOM    537 1HG2 VAL A  41      39.164  49.170  51.567  1.00  0.00     0.000 H 
ATOM    538 2HG2 VAL A  41      39.042  49.838  49.836  1.00  0.00     0.000 H 
ATOM    539 3HG2 VAL A  41      37.600  49.584  50.651  1.00  0.00     0.000 H 
ATOM    540  N   GLU A  42      41.066  53.739  51.469  1.00 27.81    -0.520 N 
ATOM    541  HN  GLU A  42      41.252  53.422  50.518  1.00  0.00     0.248 HD
ATOM    542  CA  GLU A  42      41.473  55.084  51.810  1.00 27.32     0.246 C 
ATOM    543  HA  GLU A  42      41.181  55.348  52.853  1.00  0.00     0.000 H 
ATOM    544  C   GLU A  42      40.745  55.952  50.788  1.00 25.71     0.526 C 
ATOM    545  O   GLU A  42      40.790  55.670  49.587  1.00 25.92    -0.500 OA
ATOM    546  CB  GLU A  42      42.958  55.179  51.612  1.00 29.74     0.000 C 
ATOM    547  HB1 GLU A  42      43.193  54.922  50.553  1.00  0.00     0.000 H 
ATOM    548  HB2 GLU A  42      43.445  54.336  52.156  1.00  0.00     0.000 H 
ATOM    549  CG  GLU A  42      43.670  56.455  51.967  1.00 34.34    -0.208 C 
ATOM    550  HG1 GLU A  42      43.012  57.331  51.760  1.00  0.00     0.000 H 
ATOM    551  HG2 GLU A  42      44.492  56.651  51.239  1.00  0.00     0.000 H 
ATOM    552  CD  GLU A  42      44.211  56.527  53.408  1.00 38.12     0.620 C 
ATOM    553  OE1 GLU A  42      44.209  57.652  53.967  1.00 36.66    -0.706 OA
ATOM    554  OE2 GLU A  42      44.637  55.477  53.940  1.00 36.25    -0.706 OA
ATOM    555  N   LEU A  43      40.025  56.954  51.258  1.00 21.99    -0.520 N 
ATOM    556  HN  LEU A  43      39.925  57.041  52.269  1.00  0.00     0.248 HD
ATOM    557  CA  LEU A  43      39.368  57.938  50.419  1.00 20.77     0.204 C 
ATOM    558  HA  LEU A  43      39.111  57.504  49.425  1.00  0.00     0.000 H 
ATOM    559  C   LEU A  43      40.381  59.054  50.275  1.00 20.50     0.526 C 
ATOM    560  O   LEU A  43      41.060  59.365  51.230  1.00 20.29    -0.500 OA
ATOM    561  CB  LEU A  43      38.132  58.315  51.171  1.00 21.91     0.016 C 
ATOM    562  HB1 LEU A  43      37.627  57.349  51.404  1.00  0.00     0.000 H 
ATOM    563  HB2 LEU A  43      38.493  58.677  52.162  1.00  0.00     0.000 H 
ATOM    564  CG  LEU A  43      37.023  59.256  50.789  1.00 20.32     0.054 C 
ATOM    565  HG  LEU A  43      36.055  58.714  50.899  1.00  0.00     0.000 H 
ATOM    566  CD1 LEU A  43      37.101  60.309  51.878  1.00 23.92    -0.014 C 
ATOM    567 1HD1 LEU A  43      37.046  59.905  52.916  1.00  0.00     0.000 H 
ATOM    568 2HD1 LEU A  43      36.318  61.087  51.722  1.00  0.00     0.000 H 
ATOM    569 3HD1 LEU A  43      38.017  60.931  51.751  1.00  0.00     0.000 H 
ATOM    570  CD2 LEU A  43      37.098  59.808  49.370  1.00 22.24    -0.014 C 
ATOM    571 1HD2 LEU A  43      37.041  59.034  48.569  1.00  0.00     0.000 H 
ATOM    572 2HD2 LEU A  43      38.014  60.430  49.243  1.00  0.00     0.000 H 
ATOM    573 3HD2 LEU A  43      36.315  60.586  49.214  1.00  0.00     0.000 H 
ATOM    574  N   ARG A  44      40.625  59.628  49.120  1.00 23.75    -0.520 N 
ATOM    575  HN  ARG A  44      40.098  59.364  48.288  1.00  0.00     0.248 HD
ATOM    576  CA  ARG A  44      41.651  60.638  49.049  1.00 26.89     0.237 C 
ATOM    577  HA  ARG A  44      42.014  60.836  50.085  1.00  0.00     0.000 H 
ATOM    578  C   ARG A  44      41.126  61.955  48.469  1.00 25.77     0.526 C 
ATOM    579  O   ARG A  44      40.326  62.657  49.112  1.00 23.38    -0.500 OA
ATOM    580  CB  ARG A  44      42.797  59.937  48.262  1.00 29.89     0.049 C 
ATOM    581  HB1 ARG A  44      42.633  58.835  48.302  1.00  0.00     0.000 H 
ATOM    582  HB2 ARG A  44      42.658  60.142  47.175  1.00  0.00     0.000 H 
ATOM    583  CG  ARG A  44      44.260  60.227  48.631  1.00 36.00     0.058 C 
ATOM    584  HG1 ARG A  44      44.435  61.319  48.493  1.00  0.00     0.000 H 
ATOM    585  HG2 ARG A  44      44.905  59.785  47.836  1.00  0.00     0.000 H 
ATOM    586  CD  ARG A  44      44.855  59.822  50.002  1.00 40.28     0.111 C 
ATOM    587  HD1 ARG A  44      44.915  58.719  50.152  1.00  0.00     0.000 H 
ATOM    588  HD2 ARG A  44      44.178  60.039  50.861  1.00  0.00     0.000 H 
ATOM    589  NE  ARG A  44      46.157  60.497  50.097  1.00 44.47    -0.493 N 
ATOM    590  HE  ARG A  44      46.778  60.421  49.292  1.00  0.00     0.294 HD
ATOM    591  CZ  ARG A  44      46.607  61.210  51.154  1.00 45.70     0.814 C 
ATOM    592  NH1 ARG A  44      47.724  61.927  50.968  1.00 46.55    -0.634 N 
ATOM    593 1HH1 ARG A  44      48.130  61.962  50.033  1.00  0.00     0.361 HD
ATOM    594 2HH1 ARG A  44      48.063  62.465  51.765  1.00  0.00     0.361 HD
ATOM    595  NH2 ARG A  44      46.069  61.163  52.393  1.00 46.12    -0.634 N 
ATOM    596 1HH2 ARG A  44      45.219  60.617  52.535  1.00  0.00     0.361 HD
ATOM    597 2HH2 ARG A  44      46.408  61.701  53.190  1.00  0.00     0.361 HD
ATOM    598  N   ASP A  45      41.489  62.323  47.238  1.00 23.15    -0.520 N 
ATOM    599  HN  ASP A  45      42.045  61.662  46.695  1.00  0.00     0.248 HD
ATOM    600  CA  ASP A  45      41.152  63.601  46.605  1.00 19.93     0.246 C 
ATOM    601  HA  ASP A  45      41.085  64.407  47.372  1.00  0.00     0.000 H 
ATOM    602  C   ASP A  45      39.832  63.450  45.887  1.00 16.09     0.526 C 
ATOM    603  O   ASP A  45      39.772  63.464  44.649  1.00 21.74    -0.500 OA
ATOM    604  CB  ASP A  45      42.217  63.923  45.605  1.00 21.50    -0.208 C 
ATOM    605  HB1 ASP A  45      42.157  63.226  44.737  1.00  0.00     0.000 H 
ATOM    606  HB2 ASP A  45      41.989  64.887  45.093  1.00  0.00     0.000 H 
ATOM    607  CG  ASP A  45      43.612  63.945  46.161  1.00 23.86     0.620 C 
ATOM    608  OD1 ASP A  45      44.132  62.907  46.570  1.00 25.32    -0.706 OA
ATOM    609  OD2 ASP A  45      44.191  65.026  46.155  1.00 28.39    -0.706 OA
ATOM    610  N   ASN A  46      38.792  63.221  46.662  1.00 10.26    -0.520 N 
ATOM    611  HN  ASN A  46      38.940  63.280  47.669  1.00  0.00     0.248 HD
ATOM    612  CA  ASN A  46      37.447  62.890  46.206  1.00 11.24     0.217 C 
ATOM    613  HA  ASN A  46      36.759  62.951  47.082  1.00  0.00     0.000 H 
ATOM    614  C   ASN A  46      37.329  61.463  45.597  1.00 14.96     0.526 C 
ATOM    615  O   ASN A  46      36.331  61.161  44.912  1.00 13.64    -0.500 OA
ATOM    616  CB  ASN A  46      36.991  63.902  45.179  1.00  6.68     0.003 C 
ATOM    617  HB1 ASN A  46      37.096  63.488  44.149  1.00  0.00     0.000 H 
ATOM    618  HB2 ASN A  46      37.714  64.749  45.117  1.00  0.00     0.000 H 
ATOM    619  CG  ASN A  46      35.599  64.415  45.400  1.00 10.32     0.675 C 
ATOM    620  OD1 ASN A  46      34.721  63.769  45.953  1.00 12.79    -0.470 OA
ATOM    621  ND2 ASN A  46      35.344  65.664  45.066  1.00 15.47    -0.867 N 
ATOM    622 1HD2 ASN A  46      34.397  66.013  45.216  1.00  0.00     0.344 HD
ATOM    623 2HD2 ASN A  46      36.077  66.203  44.605  1.00  0.00     0.344 HD
ATOM    624  N   GLN A  47      38.314  60.530  45.861  1.00 13.07    -0.520 N 
ATOM    625  HN  GLN A  47      39.023  60.760  46.557  1.00  0.00     0.248 HD
ATOM    626  CA  GLN A  47      38.394  59.223  45.192  1.00 11.44     0.210 C 
ATOM    627  HA  GLN A  47      37.416  59.041  44.688  1.00  0.00     0.000 H 
ATOM    628  C   GLN A  47      38.698  58.021  46.047  1.00  8.36     0.526 C 
ATOM    629  O   GLN A  47      39.264  58.239  47.093  1.00  9.82    -0.500 OA
ATOM    630  CB  GLN A  47      39.450  59.242  44.137  1.00 15.31     0.053 C 
ATOM    631  HB1 GLN A  47      40.462  59.308  44.600  1.00  0.00     0.000 H 
ATOM    632  HB2 GLN A  47      39.530  58.244  43.647  1.00  0.00     0.000 H 
ATOM    633  CG  GLN A  47      39.272  60.321  43.106  1.00 16.79    -0.043 C 
ATOM    634  HG1 GLN A  47      39.206  61.332  43.573  1.00  0.00     0.000 H 
ATOM    635  HG2 GLN A  47      38.259  60.285  42.641  1.00  0.00     0.000 H 
ATOM    636  CD  GLN A  47      40.369  60.254  42.067  1.00 20.97     0.675 C 
ATOM    637  OE1 GLN A  47      40.758  59.166  41.660  1.00 22.48    -0.470 OA
ATOM    638  NE2 GLN A  47      40.935  61.354  41.591  1.00 19.69    -0.867 N 
ATOM    639 1HE2 GLN A  47      41.675  61.309  40.890  1.00  0.00     0.344 HD
ATOM    640 2HE2 GLN A  47      40.611  62.260  41.930  1.00  0.00     0.344 HD
ATOM    641  N   LEU A  48      38.430  56.779  45.700  1.00  7.96    -0.520 N 
ATOM    642  HN  LEU A  48      37.993  56.607  44.795  1.00  0.00     0.248 HD
ATOM    643  CA  LEU A  48      38.734  55.639  46.560  1.00 11.62     0.204 C 
ATOM    644  HA  LEU A  48      38.897  56.023  47.594  1.00  0.00     0.000 H 
ATOM    645  C   LEU A  48      39.976  54.853  46.150  1.00 15.40     0.526 C 
ATOM    646  O   LEU A  48      40.046  54.390  45.020  1.00 20.50    -0.500 OA
ATOM    647  CB  LEU A  48      37.518  54.700  46.592  1.00  9.21     0.016 C 
ATOM    648  HB1 LEU A  48      37.889  53.651  46.666  1.00  0.00     0.000 H 
ATOM    649  HB2 LEU A  48      37.048  54.703  45.581  1.00  0.00     0.000 H 
ATOM    650  CG  LEU A  48      36.401  54.895  47.647  1.00 12.33     0.054 C 
ATOM    651  HG  LEU A  48      36.435  54.036  48.358  1.00  0.00     0.000 H 
ATOM    652  CD1 LEU A  48      36.673  56.180  48.430  1.00 12.65    -0.014 C 
ATOM    653 1HD1 LEU A  48      35.869  56.320  49.190  1.00  0.00     0.000 H 
ATOM    654 2HD1 LEU A  48      36.787  57.067  47.764  1.00  0.00     0.000 H 
ATOM    655 3HD1 LEU A  48      37.692  56.193  48.883  1.00  0.00     0.000 H 
ATOM    656  CD2 LEU A  48      35.027  54.930  47.004  1.00  5.83    -0.014 C 
ATOM    657 1HD2 LEU A  48      34.223  55.070  47.764  1.00  0.00     0.000 H 
ATOM    658 2HD2 LEU A  48      34.845  54.023  46.381  1.00  0.00     0.000 H 
ATOM    659 3HD2 LEU A  48      34.971  55.704  46.203  1.00  0.00     0.000 H 
ATOM    660  N   VAL A  49      41.023  54.741  46.946  1.00 20.06    -0.520 N 
ATOM    661  HN  VAL A  49      41.008  55.210  47.852  1.00  0.00     0.248 HD
ATOM    662  CA  VAL A  49      42.199  53.968  46.570  1.00 24.56     0.201 C 
ATOM    663  HA  VAL A  49      42.297  53.960  45.459  1.00  0.00     0.000 H 
ATOM    664  C   VAL A  49      41.959  52.547  47.066  1.00 28.11     0.526 C 
ATOM    665  O   VAL A  49      41.651  52.293  48.239  1.00 27.53    -0.500 OA
ATOM    666  CB  VAL A  49      43.557  54.482  47.215  1.00 23.38     0.033 C 
ATOM    667  HB  VAL A  49      43.413  54.594  48.315  1.00  0.00     0.000 H 
ATOM    668  CG1 VAL A  49      44.689  53.447  46.959  1.00 19.09     0.006 C 
ATOM    669 1HG1 VAL A  49      44.408  52.457  47.388  1.00  0.00     0.000 H 
ATOM    670 2HG1 VAL A  49      45.674  53.803  47.342  1.00  0.00     0.000 H 
ATOM    671 3HG1 VAL A  49      44.951  53.374  45.878  1.00  0.00     0.000 H 
ATOM    672  CG2 VAL A  49      43.945  55.847  46.624  1.00 17.48     0.006 C 
ATOM    673 1HG2 VAL A  49      43.133  56.589  46.808  1.00  0.00     0.000 H 
ATOM    674 2HG2 VAL A  49      44.207  55.774  45.543  1.00  0.00     0.000 H 
ATOM    675 3HG2 VAL A  49      44.930  56.203  47.007  1.00  0.00     0.000 H 
ATOM    676  N   VAL A  50      42.079  51.663  46.073  1.00 31.22    -0.520 N 
ATOM    677  HN  VAL A  50      42.250  51.998  45.125  1.00  0.00     0.248 HD
ATOM    678  CA  VAL A  50      41.972  50.234  46.312  1.00 31.44     0.201 C 
ATOM    679  HA  VAL A  50      41.058  50.060  46.926  1.00  0.00     0.000 H 
ATOM    680  C   VAL A  50      43.174  49.609  47.066  1.00 32.44     0.526 C 
ATOM    681  O   VAL A  50      44.346  49.747  46.699  1.00 29.34    -0.500 OA
ATOM    682  CB  VAL A  50      41.737  49.596  44.927  1.00 29.88     0.033 C 
ATOM    683  HB  VAL A  50      42.551  49.911  44.234  1.00  0.00     0.000 H 
ATOM    684  CG1 VAL A  50      41.709  48.072  45.011  1.00 30.05     0.006 C 
ATOM    685 1HG1 VAL A  50      42.684  47.686  45.390  1.00  0.00     0.000 H 
ATOM    686 2HG1 VAL A  50      41.428  47.607  44.037  1.00  0.00     0.000 H 
ATOM    687 3HG1 VAL A  50      40.852  47.705  45.622  1.00  0.00     0.000 H 
ATOM    688  CG2 VAL A  50      40.405  50.123  44.410  1.00 27.21     0.006 C 
ATOM    689 1HG2 VAL A  50      40.425  51.236  44.349  1.00  0.00     0.000 H 
ATOM    690 2HG2 VAL A  50      39.548  49.756  45.021  1.00  0.00     0.000 H 
ATOM    691 3HG2 VAL A  50      40.124  49.658  43.436  1.00  0.00     0.000 H 
ATOM    692  N   PRO A  51      42.906  48.890  48.159  1.00 34.92    -0.257 N 
ATOM    693  CA  PRO A  51      43.892  48.042  48.845  1.00 32.18     0.112 C 
ATOM    694  HA  PRO A  51      44.827  48.642  48.932  1.00  0.00     0.000 H 
ATOM    695  C   PRO A  51      44.293  46.681  48.274  1.00 29.76     0.526 C 
ATOM    696  O   PRO A  51      45.477  46.360  48.280  1.00 24.27    -0.500 OA
ATOM    697  CB  PRO A  51      43.318  47.930  50.230  1.00 32.83    -0.001 C 
ATOM    698  HB1 PRO A  51      43.707  47.077  50.834  1.00  0.00     0.000 H 
ATOM    699  HB2 PRO A  51      43.647  48.722  50.942  1.00  0.00     0.000 H 
ATOM    700  CG  PRO A  51      41.836  47.894  49.955  1.00 34.85     0.036 C 
ATOM    701  HG1 PRO A  51      41.441  46.908  49.617  1.00  0.00     0.000 H 
ATOM    702  HG2 PRO A  51      41.186  47.962  50.858  1.00  0.00     0.000 H 
ATOM    703  CD  PRO A  51      41.676  49.024  48.962  1.00 34.29     0.084 C 
ATOM    704  HD1 PRO A  51      41.509  50.031  49.411  1.00  0.00     0.000 H 
ATOM    705  HD2 PRO A  51      40.725  49.013  48.380  1.00  0.00     0.000 H 
ATOM    706  N   SER A  52      43.365  45.883  47.735  1.00 32.00    -0.520 N 
ATOM    707  HN  SER A  52      42.440  46.264  47.535  1.00  0.00     0.248 HD
ATOM    708  CA  SER A  52      43.637  44.474  47.422  1.00 31.77     0.292 C 
ATOM    709  HA  SER A  52      44.736  44.315  47.524  1.00  0.00     0.000 H 
ATOM    710  C   SER A  52      43.231  43.993  46.020  1.00 30.11     0.526 C 
ATOM    711  O   SER A  52      42.378  44.567  45.338  1.00 28.56    -0.500 OA
ATOM    712  CB  SER A  52      42.947  43.604  48.480  1.00 29.47     0.194 C 
ATOM    713  HB1 SER A  52      41.946  43.252  48.136  1.00  0.00     0.000 H 
ATOM    714  HB2 SER A  52      43.446  42.613  48.588  1.00  0.00     0.000 H 
ATOM    715  OG  SER A  52      42.864  44.295  49.733  1.00 31.58    -0.550 OA
ATOM    716  HG  SER A  52      42.437  43.756  50.388  1.00  0.00     0.310 HD
ATOM    717  N   GLU A  53      43.927  42.959  45.530  1.00 28.01    -0.520 N 
ATOM    718  HN  GLU A  53      44.668  42.526  46.081  1.00  0.00     0.248 HD
ATOM    719  CA  GLU A  53      43.614  42.468  44.216  1.00 28.07     0.246 C 
ATOM    720  HA  GLU A  53      43.314  43.303  43.541  1.00  0.00     0.000 H 
ATOM    721  C   GLU A  53      42.422  41.598  44.559  1.00 28.08     0.526 C 
ATOM    722  O   GLU A  53      42.456  40.876  45.565  1.00 28.60    -0.500 OA
ATOM    723  CB  GLU A  53      44.775  41.644  43.594  1.00 30.65     0.000 C 
ATOM    724  HB1 GLU A  53      45.734  41.763  44.150  1.00  0.00     0.000 H 
ATOM    725  HB2 GLU A  53      44.651  40.546  43.742  1.00  0.00     0.000 H 
ATOM    726  CG  GLU A  53      44.898  42.040  42.088  1.00 35.56    -0.208 C 
ATOM    727  HG1 GLU A  53      43.871  42.036  41.653  1.00  0.00     0.000 H 
ATOM    728  HG2 GLU A  53      45.168  43.121  42.044  1.00  0.00     0.000 H 
ATOM    729  CD  GLU A  53      45.825  41.286  41.106  1.00 35.62     0.620 C 
ATOM    730  OE1 GLU A  53      45.303  40.537  40.291  1.00 37.02    -0.706 OA
ATOM    731  OE2 GLU A  53      47.049  41.465  41.091  1.00 35.27    -0.706 OA
ATOM    732  N   GLY A  54      41.326  41.809  43.840  1.00 27.71    -0.520 N 
ATOM    733  HN  GLY A  54      41.318  42.554  43.144  1.00  0.00     0.248 HD
ATOM    734  CA  GLY A  54      40.138  40.996  44.029  1.00 28.17     0.246 C 
ATOM    735  HA1 GLY A  54      40.318  39.932  43.749  1.00  0.00     0.000 H 
ATOM    736  HA2 GLY A  54      39.907  40.849  45.110  1.00  0.00     0.000 H 
ATOM    737  C   GLY A  54      38.957  41.580  43.279  1.00 28.24     0.526 C 
ATOM    738  O   GLY A  54      39.094  42.591  42.562  1.00 28.46    -0.500 OA
ATOM    739  N   LEU A  55      37.814  40.900  43.378  1.00 25.44    -0.520 N 
ATOM    740  HN  LEU A  55      37.797  40.009  43.874  1.00  0.00     0.248 HD
ATOM    741  CA  LEU A  55      36.605  41.414  42.791  1.00 23.62     0.204 C 
ATOM    742  HA  LEU A  55      36.833  41.935  41.832  1.00  0.00     0.000 H 
ATOM    743  C   LEU A  55      36.044  42.394  43.799  1.00 23.67     0.526 C 
ATOM    744  O   LEU A  55      36.220  42.200  45.008  1.00 29.37    -0.500 OA
ATOM    745  CB  LEU A  55      35.630  40.302  42.558  1.00 22.23     0.016 C 
ATOM    746  HB1 LEU A  55      34.594  40.695  42.683  1.00  0.00     0.000 H 
ATOM    747  HB2 LEU A  55      35.690  39.582  43.408  1.00  0.00     0.000 H 
ATOM    748  CG  LEU A  55      35.713  39.531  41.248  1.00 24.33     0.054 C 
ATOM    749  HG  LEU A  55      34.905  39.904  40.577  1.00  0.00     0.000 H 
ATOM    750  CD1 LEU A  55      37.055  39.769  40.551  1.00 23.62    -0.014 C 
ATOM    751 1HD1 LEU A  55      37.116  39.204  39.592  1.00  0.00     0.000 H 
ATOM    752 2HD1 LEU A  55      37.913  39.532  41.222  1.00  0.00     0.000 H 
ATOM    753 3HD1 LEU A  55      37.252  40.856  40.400  1.00  0.00     0.000 H 
ATOM    754  CD2 LEU A  55      35.426  38.049  41.564  1.00 22.15    -0.014 C 
ATOM    755 1HD2 LEU A  55      35.487  37.484  40.605  1.00  0.00     0.000 H 
ATOM    756 2HD2 LEU A  55      34.459  37.897  42.097  1.00  0.00     0.000 H 
ATOM    757 3HD2 LEU A  55      36.094  37.636  42.355  1.00  0.00     0.000 H 
ATOM    758  N   TYR A  56      35.458  43.488  43.337  1.00 19.56    -0.520 N 
ATOM    759  HN  TYR A  56      35.463  43.674  42.334  1.00  0.00     0.248 HD
ATOM    760  CA  TYR A  56      34.814  44.419  44.224  1.00 17.05     0.245 C 
ATOM    761  HA  TYR A  56      34.715  43.974  45.242  1.00  0.00     0.000 H 
ATOM    762  C   TYR A  56      33.446  44.602  43.600  1.00 13.43     0.526 C 
ATOM    763  O   TYR A  56      33.239  44.313  42.435  1.00 14.34    -0.500 OA
ATOM    764  CB  TYR A  56      35.551  45.803  44.308  1.00 18.91     0.022 C 
ATOM    765  HB1 TYR A  56      34.864  46.582  44.713  1.00  0.00     0.000 H 
ATOM    766  HB2 TYR A  56      35.724  46.211  43.285  1.00  0.00     0.000 H 
ATOM    767  CG  TYR A  56      36.854  45.786  45.097  1.00 17.67    -0.001 A 
ATOM    768  CD1 TYR A  56      37.981  45.183  44.561  1.00 19.66    -0.035 A 
ATOM    769  HD1 TYR A  56      37.934  44.763  43.542  1.00  0.00     0.000 H 
ATOM    770  CD2 TYR A  56      36.921  46.316  46.361  1.00 19.13    -0.035 A 
ATOM    771  HD2 TYR A  56      36.036  46.803  46.805  1.00  0.00     0.000 H 
ATOM    772  CE1 TYR A  56      39.159  45.096  45.270  1.00 17.87     0.100 A 
ATOM    773  HE1 TYR A  56      40.044  44.608  44.827  1.00  0.00     0.000 H 
ATOM    774  CE2 TYR A  56      38.105  46.237  47.078  1.00 18.10     0.100 A 
ATOM    775  HE2 TYR A  56      38.160  46.668  48.092  1.00  0.00     0.000 H 
ATOM    776  CZ  TYR A  56      39.216  45.624  46.534  1.00 17.03    -0.121 A 
ATOM    777  OH  TYR A  56      40.391  45.504  47.264  1.00 16.58    -0.368 OA
ATOM    778  HH  TYR A  56      40.430  45.870  48.140  1.00  0.00     0.339 HD
ATOM    779  N   LEU A  57      32.470  45.002  44.395  1.00 13.44    -0.520 N 
ATOM    780  HN  LEU A  57      32.668  45.084  45.392  1.00  0.00     0.248 HD
ATOM    781  CA  LEU A  57      31.148  45.328  43.942  1.00 12.21     0.204 C 
ATOM    782  HA  LEU A  57      30.979  45.023  42.883  1.00  0.00     0.000 H 
ATOM    783  C   LEU A  57      31.218  46.846  44.100  1.00 15.67     0.526 C 
ATOM    784  O   LEU A  57      31.537  47.334  45.191  1.00 18.49    -0.500 OA
ATOM    785  CB  LEU A  57      30.141  44.721  44.874  1.00  9.72     0.016 C 
ATOM    786  HB1 LEU A  57      30.660  44.035  45.584  1.00  0.00     0.000 H 
ATOM    787  HB2 LEU A  57      29.768  45.503  45.576  1.00  0.00     0.000 H 
ATOM    788  CG  LEU A  57      28.999  44.024  44.268  1.00 11.19     0.054 C 
ATOM    789  HG  LEU A  57      29.363  43.289  43.513  1.00  0.00     0.000 H 
ATOM    790  CD1 LEU A  57      28.168  43.305  45.331  1.00 16.60    -0.014 C 
ATOM    791 1HD1 LEU A  57      28.805  42.538  45.829  1.00  0.00     0.000 H 
ATOM    792 2HD1 LEU A  57      27.228  42.873  44.916  1.00  0.00     0.000 H 
ATOM    793 3HD1 LEU A  57      27.705  44.011  46.059  1.00  0.00     0.000 H 
ATOM    794  CD2 LEU A  57      28.140  45.058  43.597  1.00 14.21    -0.014 C 
ATOM    795 1HD2 LEU A  57      28.746  45.582  42.822  1.00  0.00     0.000 H 
ATOM    796 2HD2 LEU A  57      27.677  45.764  44.325  1.00  0.00     0.000 H 
ATOM    797 3HD2 LEU A  57      27.200  44.626  43.182  1.00  0.00     0.000 H 
ATOM    798  N   ILE A  58      30.996  47.588  43.013  1.00 14.79    -0.520 N 
ATOM    799  HN  ILE A  58      30.742  47.117  42.145  1.00  0.00     0.248 HD
ATOM    800  CA  ILE A  58      31.100  49.034  43.011  1.00 13.92     0.199 C 
ATOM    801  HA  ILE A  58      31.417  49.413  44.010  1.00  0.00     0.000 H 
ATOM    802  C   ILE A  58      29.676  49.441  42.703  1.00 14.63     0.526 C 
ATOM    803  O   ILE A  58      29.155  49.010  41.673  1.00 15.44    -0.500 OA
ATOM    804  CB  ILE A  58      32.059  49.537  41.893  1.00 14.35     0.030 C 
ATOM    805  HB  ILE A  58      31.544  49.464  40.907  1.00  0.00     0.000 H 
ATOM    806  CG1 ILE A  58      33.372  48.708  41.847  1.00 16.06     0.017 C 
ATOM    807 1HG1 ILE A  58      33.110  47.624  41.854  1.00  0.00     0.000 H 
ATOM    808 2HG1 ILE A  58      33.895  48.813  42.826  1.00  0.00     0.000 H 
ATOM    809  CG2 ILE A  58      32.385  50.993  42.182  1.00 14.13     0.001 C 
ATOM    810 1HG2 ILE A  58      31.443  51.588  42.215  1.00  0.00     0.000 H 
ATOM    811 2HG2 ILE A  58      33.121  51.411  41.456  1.00  0.00     0.000 H 
ATOM    812 3HG2 ILE A  58      32.990  51.112  43.111  1.00  0.00     0.000 H 
ATOM    813  CD1 ILE A  58      34.396  48.966  40.705  1.00 14.24    -0.001 C 
ATOM    814 1HD1 ILE A  58      35.338  48.371  40.672  1.00  0.00     0.000 H 
ATOM    815 2HD1 ILE A  58      34.658  50.050  40.698  1.00  0.00     0.000 H 
ATOM    816 3HD1 ILE A  58      33.873  48.861  39.726  1.00  0.00     0.000 H 
ATOM    817  N   TYR A  59      29.015  50.174  43.590  1.00 14.55    -0.520 N 
ATOM    818  HN  TYR A  59      29.491  50.454  44.448  1.00  0.00     0.248 HD
ATOM    819  CA  TYR A  59      27.627  50.596  43.383  1.00 15.88     0.245 C 
ATOM    820  HA  TYR A  59      27.310  50.337  42.346  1.00  0.00     0.000 H 
ATOM    821  C   TYR A  59      27.581  52.081  43.563  1.00 13.56     0.526 C 
ATOM    822  O   TYR A  59      28.535  52.561  44.173  1.00 18.97    -0.500 OA
ATOM    823  CB  TYR A  59      26.624  50.002  44.390  1.00 11.99     0.022 C 
ATOM    824  HB1 TYR A  59      26.430  48.931  44.146  1.00  0.00     0.000 H 
ATOM    825  HB2 TYR A  59      25.611  50.433  44.215  1.00  0.00     0.000 H 
ATOM    826  CG  TYR A  59      26.997  50.138  45.850  1.00 14.27    -0.001 A 
ATOM    827  CD1 TYR A  59      26.601  51.261  46.587  1.00 15.44    -0.035 A 
ATOM    828  HD1 TYR A  59      26.059  52.081  46.086  1.00  0.00     0.000 H 
ATOM    829  CD2 TYR A  59      27.689  49.102  46.454  1.00 14.29    -0.035 A 
ATOM    830  HD2 TYR A  59      28.005  48.221  45.871  1.00  0.00     0.000 H 
ATOM    831  CE1 TYR A  59      26.884  51.352  47.943  1.00 13.98     0.100 A 
ATOM    832  HE1 TYR A  59      26.572  52.233  48.528  1.00  0.00     0.000 H 
ATOM    833  CE2 TYR A  59      27.976  49.195  47.802  1.00 15.81     0.100 A 
ATOM    834  HE2 TYR A  59      28.533  48.382  48.299  1.00  0.00     0.000 H 
ATOM    835  CZ  TYR A  59      27.569  50.307  48.543  1.00 15.33    -0.121 A 
ATOM    836  OH  TYR A  59      27.782  50.340  49.920  1.00 18.55    -0.368 OA
ATOM    837  HH  TYR A  59      27.505  51.096  50.424  1.00  0.00     0.339 HD
ATOM    838  N   SER A  60      26.559  52.809  43.140  1.00 11.06    -0.520 N 
ATOM    839  HN  SER A  60      25.824  52.377  42.580  1.00  0.00     0.248 HD
ATOM    840  CA  SER A  60      26.482  54.233  43.474  1.00 10.79     0.292 C 
ATOM    841  HA  SER A  60      26.667  54.356  44.567  1.00  0.00     0.000 H 
ATOM    842  C   SER A  60      25.092  54.768  43.149  1.00  9.66     0.526 C 
ATOM    843  O   SER A  60      24.489  54.357  42.143  1.00 10.08    -0.500 OA
ATOM    844  CB  SER A  60      27.590  54.997  42.688  1.00  8.82     0.194 C 
ATOM    845  HB1 SER A  60      28.583  54.600  43.003  1.00  0.00     0.000 H 
ATOM    846  HB2 SER A  60      27.550  54.676  41.621  1.00  0.00     0.000 H 
ATOM    847  OG  SER A  60      27.639  56.411  42.729  1.00 12.35    -0.550 OA
ATOM    848  HG  SER A  60      28.314  56.877  42.250  1.00  0.00     0.310 HD
ATOM    849  N   GLN A  61      24.521  55.639  43.961  1.00  6.73    -0.520 N 
ATOM    850  HN  GLN A  61      24.938  55.890  44.857  1.00  0.00     0.248 HD
ATOM    851  CA  GLN A  61      23.271  56.220  43.512  1.00 10.16     0.210 C 
ATOM    852  HA  GLN A  61      23.079  55.912  42.458  1.00  0.00     0.000 H 
ATOM    853  C   GLN A  61      23.359  57.736  43.584  1.00 11.20     0.526 C 
ATOM    854  O   GLN A  61      24.125  58.226  44.417  1.00 15.41    -0.500 OA
ATOM    855  CB  GLN A  61      22.145  55.754  44.375  1.00 13.56     0.053 C 
ATOM    856  HB1 GLN A  61      22.279  56.078  45.433  1.00  0.00     0.000 H 
ATOM    857  HB2 GLN A  61      22.177  54.650  44.528  1.00  0.00     0.000 H 
ATOM    858  CG  GLN A  61      20.782  56.209  43.812  1.00 15.82    -0.043 C 
ATOM    859  HG1 GLN A  61      20.910  57.176  43.272  1.00  0.00     0.000 H 
ATOM    860  HG2 GLN A  61      20.487  55.538  42.971  1.00  0.00     0.000 H 
ATOM    861  CD  GLN A  61      19.622  56.328  44.794  1.00 11.97     0.675 C 
ATOM    862  OE1 GLN A  61      19.016  55.353  45.248  1.00  9.86    -0.470 OA
ATOM    863  NE2 GLN A  61      19.380  57.595  45.070  1.00  6.05    -0.867 N 
ATOM    864 1HE2 GLN A  61      18.604  57.675  45.727  1.00  0.00     0.344 HD
ATOM    865 2HE2 GLN A  61      19.881  58.401  44.695  1.00  0.00     0.344 HD
ATOM    866  N   VAL A  62      22.715  58.527  42.727  1.00 11.04    -0.520 N 
ATOM    867  HN  VAL A  62      22.264  58.105  41.915  1.00  0.00     0.248 HD
ATOM    868  CA  VAL A  62      22.628  59.986  42.905  1.00 12.91     0.201 C 
ATOM    869  HA  VAL A  62      22.833  60.245  43.970  1.00  0.00     0.000 H 
ATOM    870  C   VAL A  62      21.198  60.318  42.572  1.00 13.69     0.526 C 
ATOM    871  O   VAL A  62      20.440  59.532  41.979  1.00 19.64    -0.500 OA
ATOM    872  CB  VAL A  62      23.454  60.903  41.983  1.00 11.86     0.033 C 
ATOM    873  HB  VAL A  62      23.240  61.968  42.233  1.00  0.00     0.000 H 
ATOM    874  CG1 VAL A  62      24.898  60.621  42.220  1.00 14.88     0.006 C 
ATOM    875 1HG1 VAL A  62      25.496  61.285  41.553  1.00  0.00     0.000 H 
ATOM    876 2HG1 VAL A  62      25.152  59.543  42.094  1.00  0.00     0.000 H 
ATOM    877 3HG1 VAL A  62      25.185  60.719  43.293  1.00  0.00     0.000 H 
ATOM    878  CG2 VAL A  62      23.169  60.666  40.532  1.00 17.68     0.006 C 
ATOM    879 1HG2 VAL A  62      23.767  61.330  39.865  1.00  0.00     0.000 H 
ATOM    880 2HG2 VAL A  62      22.079  60.759  40.317  1.00  0.00     0.000 H 
ATOM    881 3HG2 VAL A  62      23.314  59.593  40.265  1.00  0.00     0.000 H 
ATOM    882  N   LEU A  63      20.790  61.493  42.964  1.00 13.71    -0.520 N 
ATOM    883  HN  LEU A  63      21.447  62.143  43.395  1.00  0.00     0.248 HD
ATOM    884  CA  LEU A  63      19.415  61.871  42.788  1.00 12.38     0.204 C 
ATOM    885  HA  LEU A  63      18.873  61.135  42.149  1.00  0.00     0.000 H 
ATOM    886  C   LEU A  63      19.516  63.198  42.116  1.00 16.17     0.526 C 
ATOM    887  O   LEU A  63      20.505  63.904  42.312  1.00 20.45    -0.500 OA
ATOM    888  CB  LEU A  63      18.728  62.049  44.114  1.00 12.09     0.016 C 
ATOM    889  HB1 LEU A  63      19.355  62.737  44.727  1.00  0.00     0.000 H 
ATOM    890  HB2 LEU A  63      17.811  62.658  43.938  1.00  0.00     0.000 H 
ATOM    891  CG  LEU A  63      18.338  60.885  44.993  1.00 11.55     0.054 C 
ATOM    892  HG  LEU A  63      19.214  60.479  45.551  1.00  0.00     0.000 H 
ATOM    893  CD1 LEU A  63      17.260  61.360  45.923  1.00 14.43    -0.014 C 
ATOM    894 1HD1 LEU A  63      16.972  60.500  46.572  1.00  0.00     0.000 H 
ATOM    895 2HD1 LEU A  63      16.392  61.809  45.387  1.00  0.00     0.000 H 
ATOM    896 3HD1 LEU A  63      17.556  62.264  46.505  1.00  0.00     0.000 H 
ATOM    897  CD2 LEU A  63      17.625  59.820  44.239  1.00 17.26    -0.014 C 
ATOM    898 1HD2 LEU A  63      17.337  58.960  44.888  1.00  0.00     0.000 H 
ATOM    899 2HD2 LEU A  63      18.223  59.479  43.362  1.00  0.00     0.000 H 
ATOM    900 3HD2 LEU A  63      16.739  60.232  43.701  1.00  0.00     0.000 H 
ATOM    901  N   PHE A  64      18.549  63.608  41.330  1.00 18.17    -0.520 N 
ATOM    902  HN  PHE A  64      17.756  63.000  41.125  1.00  0.00     0.248 HD
ATOM    903  CA  PHE A  64      18.622  64.933  40.759  1.00 17.89     0.214 C 
ATOM    904  HA  PHE A  64      19.375  65.543  41.310  1.00  0.00     0.000 H 
ATOM    905  C   PHE A  64      17.244  65.534  40.933  1.00 20.82     0.526 C 
ATOM    906  O   PHE A  64      16.227  64.817  40.866  1.00 25.14    -0.500 OA
ATOM    907  CB  PHE A  64      18.996  64.847  39.303  1.00 16.97     0.038 C 
ATOM    908  HB1 PHE A  64      18.737  65.800  38.786  1.00  0.00     0.000 H 
ATOM    909  HB2 PHE A  64      18.312  64.143  38.775  1.00  0.00     0.000 H 
ATOM    910  CG  PHE A  64      20.438  64.479  39.019  1.00 12.46     0.011 A 
ATOM    911  CD1 PHE A  64      20.772  63.193  38.612  1.00 12.31    -0.011 A 
ATOM    912  HD1 PHE A  64      19.999  62.407  38.583  1.00  0.00     0.000 H 
ATOM    913  CD2 PHE A  64      21.402  65.447  39.072  1.00 10.95    -0.011 A 
ATOM    914  HD2 PHE A  64      21.146  66.466  39.408  1.00  0.00     0.000 H 
ATOM    915  CE1 PHE A  64      22.074  62.897  38.243  1.00 11.38     0.004 A 
ATOM    916  HE1 PHE A  64      22.339  61.878  37.915  1.00  0.00     0.000 H 
ATOM    917  CE2 PHE A  64      22.692  65.144  38.705  1.00 10.69     0.004 A 
ATOM    918  HE2 PHE A  64      23.467  65.928  38.745  1.00  0.00     0.000 H 
ATOM    919  CZ  PHE A  64      23.031  63.877  38.288  1.00 11.54    -0.003 A 
ATOM    920  HZ  PHE A  64      24.069  63.651  37.991  1.00  0.00     0.000 H 
ATOM    921  N   LYS A  65      17.178  66.820  41.231  1.00 20.18    -0.520 N 
ATOM    922  HN  LYS A  65      18.041  67.355  41.332  1.00  0.00     0.248 HD
ATOM    923  CA  LYS A  65      15.910  67.483  41.417  1.00 18.20     0.227 C 
ATOM    924  HA  LYS A  65      15.075  66.867  41.009  1.00  0.00     0.000 H 
ATOM    925  C   LYS A  65      16.097  68.740  40.607  1.00 21.53     0.526 C 
ATOM    926  O   LYS A  65      17.202  69.179  40.285  1.00 21.80    -0.500 OA
ATOM    927  CB  LYS A  65      15.673  67.814  42.904  1.00 16.46     0.039 C 
ATOM    928  HB1 LYS A  65      16.238  67.076  43.520  1.00  0.00     0.000 H 
ATOM    929  HB2 LYS A  65      14.617  67.556  43.154  1.00  0.00     0.000 H 
ATOM    930  CG  LYS A  65      15.964  69.208  43.446  1.00 16.99     0.053 C 
ATOM    931  HG1 LYS A  65      15.564  69.309  44.482  1.00  0.00     0.000 H 
ATOM    932  HG2 LYS A  65      15.335  69.964  42.920  1.00  0.00     0.000 H 
ATOM    933  CD  LYS A  65      17.462  69.634  43.405  1.00 23.91     0.048 C 
ATOM    934  HD1 LYS A  65      17.935  69.296  42.453  1.00  0.00     0.000 H 
ATOM    935  HD2 LYS A  65      18.054  69.037  44.137  1.00  0.00     0.000 H 
ATOM    936  CE  LYS A  65      17.711  71.155  43.622  1.00 26.95     0.218 C 
ATOM    937  HE1 LYS A  65      16.778  71.755  43.512  1.00  0.00     0.000 H 
ATOM    938  HE2 LYS A  65      18.292  71.611  42.786  1.00  0.00     0.000 H 
ATOM    939  NZ  LYS A  65      18.351  71.362  44.916  1.00 31.59    -0.272 N 
ATOM    940  HZ1 LYS A  65      18.514  72.359  45.058  1.00  0.00     0.311 HD
ATOM    941  HZ2 LYS A  65      19.205  70.813  45.016  1.00  0.00     0.311 HD
ATOM    942  HZ3 LYS A  65      17.820  70.945  45.680  1.00  0.00     0.311 HD
ATOM    943  N   GLY A  66      15.000  69.359  40.318  1.00 25.99    -0.520 N 
ATOM    944  HN  GLY A  66      14.123  68.930  40.612  1.00  0.00     0.248 HD
ATOM    945  CA  GLY A  66      14.927  70.613  39.609  1.00 28.23     0.246 C 
ATOM    946  HA1 GLY A  66      15.636  71.397  39.963  1.00  0.00     0.000 H 
ATOM    947  HA2 GLY A  66      15.313  70.587  38.563  1.00  0.00     0.000 H 
ATOM    948  C   GLY A  66      13.456  70.968  39.743  1.00 30.38     0.526 C 
ATOM    949  O   GLY A  66      12.640  70.176  40.268  1.00 25.49    -0.500 OA
ATOM    950  N   GLN A  67      13.087  72.166  39.326  1.00 31.64    -0.520 N 
ATOM    951  HN  GLN A  67      13.774  72.790  38.903  1.00  0.00     0.248 HD
ATOM    952  CA  GLN A  67      11.708  72.597  39.468  1.00 35.19     0.210 C 
ATOM    953  HA  GLN A  67      11.020  71.732  39.618  1.00  0.00     0.000 H 
ATOM    954  C   GLN A  67      11.482  73.261  38.136  1.00 35.97     0.526 C 
ATOM    955  O   GLN A  67      12.094  74.310  37.913  1.00 38.06    -0.500 OA
ATOM    956  CB  GLN A  67      11.629  73.567  40.603  1.00 33.52     0.053 C 
ATOM    957  HB1 GLN A  67      11.903  74.598  40.280  1.00  0.00     0.000 H 
ATOM    958  HB2 GLN A  67      12.444  73.397  41.344  1.00  0.00     0.000 H 
ATOM    959  CG  GLN A  67      10.291  73.535  41.247  1.00 33.62    -0.043 C 
ATOM    960  HG1 GLN A  67      10.142  72.625  41.875  1.00  0.00     0.000 H 
ATOM    961  HG2 GLN A  67       9.470  73.354  40.514  1.00  0.00     0.000 H 
ATOM    962  CD  GLN A  67      10.094  74.816  42.030  1.00 36.03     0.675 C 
ATOM    963  OE1 GLN A  67      11.011  75.610  42.205  1.00 36.50    -0.470 OA
ATOM    964  NE2 GLN A  67       8.892  75.128  42.488  1.00 38.44    -0.867 N 
ATOM    965 1HE2 GLN A  67       8.759  75.991  43.015  1.00  0.00     0.344 HD
ATOM    966 2HE2 GLN A  67       8.129  74.467  42.342  1.00  0.00     0.344 HD
ATOM    967  N   GLY A  68      10.715  72.657  37.228  1.00 35.20    -0.520 N 
ATOM    968  HN  GLY A  68      10.214  71.799  37.457  1.00  0.00     0.248 HD
ATOM    969  CA  GLY A  68      10.610  73.243  35.917  1.00 36.63     0.246 C 
ATOM    970  HA1 GLY A  68       9.695  72.891  35.385  1.00  0.00     0.000 H 
ATOM    971  HA2 GLY A  68      10.369  74.330  35.974  1.00  0.00     0.000 H 
ATOM    972  C   GLY A  68      11.881  72.990  35.081  1.00 38.01     0.526 C 
ATOM    973  O   GLY A  68      13.055  72.797  35.454  1.00 31.93    -0.500 OA
ATOM    974  N   CYS A  69      11.505  72.986  33.832  1.00 41.94    -0.520 N 
ATOM    975  HN  CYS A  69      10.553  73.256  33.584  1.00  0.00     0.248 HD
ATOM    976  CA  CYS A  69      12.430  72.603  32.811  1.00 45.94     0.088 C 
ATOM    977  HA  CYS A  69      13.364  72.215  33.279  1.00  0.00     0.000 H 
ATOM    978  C   CYS A  69      12.744  73.807  31.993  1.00 49.60     0.526 C 
ATOM    979  O   CYS A  69      11.815  74.449  31.490  1.00 48.80    -0.500 OA
ATOM    980  CB  CYS A  69      11.760  71.512  32.054  1.00 46.17     0.143 C 
ATOM    981  HB1 CYS A  69      10.684  71.668  31.808  1.00  0.00     0.000 H 
ATOM    982  HB2 CYS A  69      12.066  71.387  30.989  1.00  0.00     0.000 H 
ATOM    983  SG  CYS A  69      12.139  70.139  33.164  1.00 48.93     0.015 SA
ATOM    984  N   PRO A  70      14.047  74.140  31.989  1.00 54.77    -0.257 N 
ATOM    985  CA  PRO A  70      14.571  75.455  31.590  1.00 55.79     0.112 C 
ATOM    986  HA  PRO A  70      13.853  76.262  31.867  1.00  0.00     0.000 H 
ATOM    987  C   PRO A  70      14.790  75.429  30.078  1.00 57.27     0.526 C 
ATOM    988  O   PRO A  70      13.928  74.975  29.303  1.00 56.55    -0.500 OA
ATOM    989  CB  PRO A  70      15.819  75.532  32.458  1.00 55.59    -0.001 C 
ATOM    990  HB1 PRO A  70      15.640  75.864  33.507  1.00  0.00     0.000 H 
ATOM    991  HB2 PRO A  70      16.519  76.360  32.199  1.00  0.00     0.000 H 
ATOM    992  CG  PRO A  70      16.408  74.125  32.321  1.00 55.73     0.036 C 
ATOM    993  HG1 PRO A  70      17.199  73.873  33.066  1.00  0.00     0.000 H 
ATOM    994  HG2 PRO A  70      17.051  73.972  31.423  1.00  0.00     0.000 H 
ATOM    995  CD  PRO A  70      15.145  73.224  32.381  1.00 54.85     0.084 C 
ATOM    996  HD1 PRO A  70      15.211  72.294  31.769  1.00  0.00     0.000 H 
ATOM    997  HD2 PRO A  70      14.991  72.710  33.358  1.00  0.00     0.000 H 
ATOM    998  N   SER A  71      15.996  75.772  29.624  1.00 59.64    -0.520 N 
ATOM    999  HN  SER A  71      16.739  76.067  30.258  1.00  0.00     0.248 HD
ATOM   1000  CA  SER A  71      16.206  75.709  28.199  1.00 63.63     0.292 C 
ATOM   1001  HA  SER A  71      15.289  76.084  27.687  1.00  0.00     0.000 H 
ATOM   1002  C   SER A  71      16.465  74.276  27.747  1.00 62.56     0.526 C 
ATOM   1003  O   SER A  71      17.447  73.595  28.071  1.00 62.27    -0.500 OA
ATOM   1004  CB  SER A  71      17.388  76.532  27.738  1.00 65.64     0.194 C 
ATOM   1005  HB1 SER A  71      18.290  75.891  27.597  1.00  0.00     0.000 H 
ATOM   1006  HB2 SER A  71      17.760  77.190  28.557  1.00  0.00     0.000 H 
ATOM   1007  OG  SER A  71      17.110  77.288  26.563  1.00 68.66    -0.550 OA
ATOM   1008  HG  SER A  71      17.853  77.805  26.273  1.00  0.00     0.310 HD
ATOM   1009  N   THR A  72      15.414  73.890  27.029  1.00 60.35    -0.520 N 
ATOM   1010  HN  THR A  72      14.580  74.476  27.073  1.00  0.00     0.248 HD
ATOM   1011  CA  THR A  72      15.349  72.720  26.196  1.00 55.31     0.268 C 
ATOM   1012  HA  THR A  72      14.282  72.398  26.206  1.00  0.00     0.000 H 
ATOM   1013  C   THR A  72      16.168  71.477  26.587  1.00 49.81     0.526 C 
ATOM   1014  O   THR A  72      15.488  70.476  26.844  1.00 47.07    -0.500 OA
ATOM   1015  CB  THR A  72      15.618  73.350  24.690  1.00 57.25     0.211 C 
ATOM   1016  HB  THR A  72      14.832  74.116  24.493  1.00  0.00     0.000 H 
ATOM   1017  OG1 THR A  72      15.422  72.273  23.772  1.00 55.39    -0.550 OA
ATOM   1018  HG1 THR A  72      15.576  72.635  22.907  1.00  0.00     0.310 HD
ATOM   1019  CG2 THR A  72      17.003  74.012  24.449  1.00 55.21     0.007 C 
ATOM   1020 1HG2 THR A  72      17.184  74.437  23.434  1.00  0.00     0.000 H 
ATOM   1021 2HG2 THR A  72      17.813  73.289  24.702  1.00  0.00     0.000 H 
ATOM   1022 3HG2 THR A  72      17.182  74.797  25.220  1.00  0.00     0.000 H 
ATOM   1023  N   HIS A  73      17.511  71.377  26.719  1.00 44.52    -0.520 N 
ATOM   1024  HN  HIS A  73      18.090  72.217  26.710  1.00  0.00     0.248 HD
ATOM   1025  CA  HIS A  73      18.124  70.071  26.874  1.00 39.16     0.195 C 
ATOM   1026  HA  HIS A  73      17.304  69.403  27.228  1.00  0.00     0.000 H 
ATOM   1027  C   HIS A  73      19.279  69.790  27.782  1.00 35.80     0.526 C 
ATOM   1028  O   HIS A  73      20.433  69.819  27.378  1.00 33.67    -0.500 OA
ATOM   1029  CB  HIS A  73      18.483  69.562  25.495  1.00 41.23     0.211 C 
ATOM   1030  HB1 HIS A  73      18.319  70.276  24.655  1.00  0.00     0.000 H 
ATOM   1031  HB2 HIS A  73      19.572  69.435  25.292  1.00  0.00     0.000 H 
ATOM   1032  CG  HIS A  73      17.651  68.295  25.458  1.00 45.07     0.103 A 
ATOM   1033  ND1 HIS A  73      16.322  68.197  25.615  1.00 44.73    -0.613 N 
ATOM   1034  HD1 HIS A  73      15.669  68.977  25.688  1.00  0.00     0.478 HD
ATOM   1035  CD2 HIS A  73      18.165  67.025  25.385  1.00 46.59     0.353 A 
ATOM   1036  HD2 HIS A  73      19.218  66.728  25.244  1.00  0.00     0.000 H 
ATOM   1037  CE1 HIS A  73      16.009  66.926  25.658  1.00 46.15     0.719 A 
ATOM   1038  HE1 HIS A  73      14.998  66.505  25.786  1.00  0.00     0.000 H 
ATOM   1039  NE2 HIS A  73      17.125  66.247  25.520  1.00 48.01    -0.686 N 
ATOM   1040  HE2 HIS A  73      17.174  65.228  25.518  1.00  0.00     0.486 HD
ATOM   1041  N   VAL A  74      18.849  69.290  28.951  1.00 34.01    -0.520 N 
ATOM   1042  HN  VAL A  74      17.872  69.014  29.053  1.00  0.00     0.248 HD
ATOM   1043  CA  VAL A  74      19.764  69.137  30.077  1.00 33.36     0.201 C 
ATOM   1044  HA  VAL A  74      20.342  70.089  30.129  1.00  0.00     0.000 H 
ATOM   1045  C   VAL A  74      20.801  68.019  30.123  1.00 32.20     0.526 C 
ATOM   1046  O   VAL A  74      21.986  68.361  30.220  1.00 35.39    -0.500 OA
ATOM   1047  CB  VAL A  74      18.980  69.044  31.424  1.00 33.30     0.033 C 
ATOM   1048  HB  VAL A  74      18.493  68.047  31.534  1.00  0.00     0.000 H 
ATOM   1049  CG1 VAL A  74      19.947  69.310  32.574  1.00 35.43     0.006 C 
ATOM   1050 1HG1 VAL A  74      19.387  69.244  33.536  1.00  0.00     0.000 H 
ATOM   1051 2HG1 VAL A  74      20.487  70.279  32.461  1.00  0.00     0.000 H 
ATOM   1052 3HG1 VAL A  74      20.834  68.635  32.550  1.00  0.00     0.000 H 
ATOM   1053  CG2 VAL A  74      17.973  70.162  31.593  1.00 35.86     0.006 C 
ATOM   1054 1HG2 VAL A  74      17.413  70.096  32.555  1.00  0.00     0.000 H 
ATOM   1055 2HG2 VAL A  74      17.274  70.205  30.726  1.00  0.00     0.000 H 
ATOM   1056 3HG2 VAL A  74      18.460  71.159  31.482  1.00  0.00     0.000 H 
ATOM   1057  N   LEU A  75      20.462  66.725  30.042  1.00 25.51    -0.520 N 
ATOM   1058  HN  LEU A  75      19.499  66.475  29.819  1.00  0.00     0.248 HD
ATOM   1059  CA  LEU A  75      21.457  65.647  30.270  1.00 20.46     0.204 C 
ATOM   1060  HA  LEU A  75      20.899  64.682  30.246  1.00  0.00     0.000 H 
ATOM   1061  C   LEU A  75      22.214  65.694  31.623  1.00 15.34     0.526 C 
ATOM   1062  O   LEU A  75      23.077  66.524  31.933  1.00 10.19    -0.500 OA
ATOM   1063  CB  LEU A  75      22.573  65.558  29.154  1.00 16.70     0.016 C 
ATOM   1064  HB1 LEU A  75      23.232  66.449  29.277  1.00  0.00     0.000 H 
ATOM   1065  HB2 LEU A  75      23.249  64.716  29.432  1.00  0.00     0.000 H 
ATOM   1066  CG  LEU A  75      22.273  65.420  27.647  1.00 18.67     0.054 C 
ATOM   1067  HG  LEU A  75      23.120  64.890  27.153  1.00  0.00     0.000 H 
ATOM   1068  CD1 LEU A  75      20.975  64.642  27.389  1.00 15.84    -0.014 C 
ATOM   1069 1HD1 LEU A  75      21.067  63.619  27.823  1.00  0.00     0.000 H 
ATOM   1070 2HD1 LEU A  75      20.703  64.620  26.308  1.00  0.00     0.000 H 
ATOM   1071 3HD1 LEU A  75      20.076  65.182  27.767  1.00  0.00     0.000 H 
ATOM   1072  CD2 LEU A  75      22.146  66.825  27.051  1.00 19.44    -0.014 C 
ATOM   1073 1HD2 LEU A  75      23.089  67.390  27.238  1.00  0.00     0.000 H 
ATOM   1074 2HD2 LEU A  75      21.247  67.365  27.429  1.00  0.00     0.000 H 
ATOM   1075 3HD2 LEU A  75      21.874  66.803  25.970  1.00  0.00     0.000 H 
ATOM   1076  N   LEU A  76      21.730  64.788  32.468  1.00 11.41    -0.520 N 
ATOM   1077  HN  LEU A  76      20.878  64.292  32.208  1.00  0.00     0.248 HD
ATOM   1078  CA  LEU A  76      22.352  64.467  33.744  1.00 10.70     0.204 C 
ATOM   1079  HA  LEU A  76      23.006  65.305  34.081  1.00  0.00     0.000 H 
ATOM   1080  C   LEU A  76      23.190  63.229  33.431  1.00 11.79     0.526 C 
ATOM   1081  O   LEU A  76      22.774  62.354  32.667  1.00 14.65    -0.500 OA
ATOM   1082  CB  LEU A  76      21.311  64.121  34.836  1.00  6.18     0.016 C 
ATOM   1083  HB1 LEU A  76      20.728  63.262  34.429  1.00  0.00     0.000 H 
ATOM   1084  HB2 LEU A  76      21.896  63.673  35.672  1.00  0.00     0.000 H 
ATOM   1085  CG  LEU A  76      20.247  65.061  35.525  1.00  4.20     0.054 C 
ATOM   1086  HG  LEU A  76      20.248  64.871  36.624  1.00  0.00     0.000 H 
ATOM   1087  CD1 LEU A  76      20.550  66.497  35.277  1.00  2.00    -0.014 C 
ATOM   1088 1HD1 LEU A  76      21.577  66.665  35.676  1.00  0.00     0.000 H 
ATOM   1089 2HD1 LEU A  76      19.788  67.193  35.700  1.00  0.00     0.000 H 
ATOM   1090 3HD1 LEU A  76      20.431  66.800  34.210  1.00  0.00     0.000 H 
ATOM   1091  CD2 LEU A  76      18.863  64.834  34.987  1.00  2.00    -0.014 C 
ATOM   1092 1HD2 LEU A  76      18.636  63.758  35.173  1.00  0.00     0.000 H 
ATOM   1093 2HD2 LEU A  76      18.744  65.137  33.920  1.00  0.00     0.000 H 
ATOM   1094 3HD2 LEU A  76      18.101  65.530  35.410  1.00  0.00     0.000 H 
ATOM   1095  N   THR A  77      24.412  63.118  33.920  1.00 13.76    -0.520 N 
ATOM   1096  HN  THR A  77      24.779  63.864  34.511  1.00  0.00     0.248 HD
ATOM   1097  CA  THR A  77      25.239  61.976  33.642  1.00 11.45     0.268 C 
ATOM   1098  HA  THR A  77      24.631  61.181  33.152  1.00  0.00     0.000 H 
ATOM   1099  C   THR A  77      25.719  61.496  34.973  1.00 11.20     0.526 C 
ATOM   1100  O   THR A  77      25.963  62.300  35.896  1.00 11.52    -0.500 OA
ATOM   1101  CB  THR A  77      26.496  62.309  32.753  1.00 13.94     0.211 C 
ATOM   1102  HB  THR A  77      27.009  61.349  32.509  1.00  0.00     0.000 H 
ATOM   1103  OG1 THR A  77      27.451  63.169  33.411  1.00 11.65    -0.550 OA
ATOM   1104  HG1 THR A  77      28.209  63.370  32.875  1.00  0.00     0.310 HD
ATOM   1105  CG2 THR A  77      25.972  62.904  31.454  1.00 12.98     0.007 C 
ATOM   1106 1HG2 THR A  77      26.862  63.140  30.825  1.00  0.00     0.000 H 
ATOM   1107 2HG2 THR A  77      25.301  63.780  31.612  1.00  0.00     0.000 H 
ATOM   1108 3HG2 THR A  77      25.231  62.250  30.939  1.00  0.00     0.000 H 
ATOM   1109  N   HIS A  78      25.848  60.177  35.068  1.00 11.90    -0.520 N 
ATOM   1110  HN  HIS A  78      25.504  59.567  34.327  1.00  0.00     0.248 HD
ATOM   1111  CA  HIS A  78      26.484  59.624  36.241  1.00 11.02     0.195 C 
ATOM   1112  HA  HIS A  78      26.956  60.464  36.802  1.00  0.00     0.000 H 
ATOM   1113  C   HIS A  78      27.573  58.591  35.942  1.00 12.93     0.526 C 
ATOM   1114  O   HIS A  78      27.186  57.451  35.678  1.00 18.10    -0.500 OA
ATOM   1115  CB  HIS A  78      25.402  59.041  37.109  1.00  9.20     0.211 C 
ATOM   1116  HB1 HIS A  78      24.531  59.727  37.230  1.00  0.00     0.000 H 
ATOM   1117  HB2 HIS A  78      24.862  58.198  36.617  1.00  0.00     0.000 H 
ATOM   1118  CG  HIS A  78      26.022  58.645  38.431  1.00 13.92     0.103 A 
ATOM   1119  ND1 HIS A  78      25.722  57.562  39.138  1.00 15.11    -0.613 N 
ATOM   1120  HD1 HIS A  78      25.014  56.859  38.927  1.00  0.00     0.478 HD
ATOM   1121  CD2 HIS A  78      27.052  59.340  39.062  1.00 14.49     0.353 A 
ATOM   1122  HD2 HIS A  78      27.526  60.278  38.729  1.00  0.00     0.000 H 
ATOM   1123  CE1 HIS A  78      26.538  57.592  40.172  1.00 19.21     0.719 A 
ATOM   1124  HE1 HIS A  78      26.557  56.835  40.974  1.00  0.00     0.000 H 
ATOM   1125  NE2 HIS A  78      27.335  58.653  40.121  1.00 17.67    -0.686 N 
ATOM   1126  HE2 HIS A  78      28.054  58.888  40.806  1.00  0.00     0.486 HD
ATOM   1127  N   THR A  79      28.888  58.864  36.071  1.00 13.22    -0.520 N 
ATOM   1128  HN  THR A  79      29.173  59.741  36.507  1.00  0.00     0.248 HD
ATOM   1129  CA  THR A  79      29.915  57.936  35.603  1.00 11.06     0.268 C 
ATOM   1130  HA  THR A  79      29.413  57.042  35.166  1.00  0.00     0.000 H 
ATOM   1131  C   THR A  79      30.829  57.479  36.718  1.00 14.04     0.526 C 
ATOM   1132  O   THR A  79      31.297  58.373  37.419  1.00 17.80    -0.500 OA
ATOM   1133  CB  THR A  79      30.817  58.608  34.483  1.00 13.16     0.211 C 
ATOM   1134  HB  THR A  79      31.384  59.465  34.916  1.00  0.00     0.000 H 
ATOM   1135  OG1 THR A  79      29.985  59.063  33.423  1.00 17.66    -0.550 OA
ATOM   1136  HG1 THR A  79      30.525  59.465  32.753  1.00  0.00     0.310 HD
ATOM   1137  CG2 THR A  79      31.760  57.664  33.805  1.00  8.88     0.007 C 
ATOM   1138 1HG2 THR A  79      32.394  58.136  33.018  1.00  0.00     0.000 H 
ATOM   1139 2HG2 THR A  79      31.205  56.792  33.387  1.00  0.00     0.000 H 
ATOM   1140 3HG2 THR A  79      32.397  57.142  34.557  1.00  0.00     0.000 H 
ATOM   1141  N   ILE A  80      31.074  56.170  36.945  1.00 14.02    -0.520 N 
ATOM   1142  HN  ILE A  80      30.500  55.475  36.467  1.00  0.00     0.248 HD
ATOM   1143  CA  ILE A  80      32.130  55.708  37.849  1.00 11.76     0.199 C 
ATOM   1144  HA  ILE A  80      32.446  56.541  38.519  1.00  0.00     0.000 H 
ATOM   1145  C   ILE A  80      33.293  55.324  36.906  1.00 12.31     0.526 C 
ATOM   1146  O   ILE A  80      33.093  54.584  35.939  1.00 16.09    -0.500 OA
ATOM   1147  CB  ILE A  80      31.694  54.468  38.709  1.00 12.43     0.030 C 
ATOM   1148  HB  ILE A  80      31.532  53.585  38.048  1.00  0.00     0.000 H 
ATOM   1149  CG1 ILE A  80      30.437  54.726  39.557  1.00 14.44     0.017 C 
ATOM   1150 1HG1 ILE A  80      29.586  55.004  38.892  1.00  0.00     0.000 H 
ATOM   1151 2HG1 ILE A  80      30.561  55.672  40.134  1.00  0.00     0.000 H 
ATOM   1152  CG2 ILE A  80      32.842  54.188  39.682  1.00 12.53     0.001 C 
ATOM   1153 1HG2 ILE A  80      32.533  53.308  40.292  1.00  0.00     0.000 H 
ATOM   1154 2HG2 ILE A  80      33.125  55.074  40.297  1.00  0.00     0.000 H 
ATOM   1155 3HG2 ILE A  80      33.826  54.050  39.176  1.00  0.00     0.000 H 
ATOM   1156  CD1 ILE A  80      30.000  53.581  40.515  1.00 13.74    -0.001 C 
ATOM   1157 1HD1 ILE A  80      29.089  53.768  41.130  1.00  0.00     0.000 H 
ATOM   1158 2HD1 ILE A  80      30.851  53.303  41.180  1.00  0.00     0.000 H 
ATOM   1159 3HD1 ILE A  80      29.876  52.635  39.938  1.00  0.00     0.000 H 
ATOM   1160  N   SER A  81      34.510  55.768  37.133  1.00 10.12    -0.520 N 
ATOM   1161  HN  SER A  81      34.647  56.279  38.005  1.00  0.00     0.248 HD
ATOM   1162  CA  SER A  81      35.691  55.615  36.282  1.00 11.10     0.292 C 
ATOM   1163  HA  SER A  81      35.455  54.951  35.418  1.00  0.00     0.000 H 
ATOM   1164  C   SER A  81      36.817  55.005  37.119  1.00 14.45     0.526 C 
ATOM   1165  O   SER A  81      36.818  55.064  38.369  1.00 16.93    -0.500 OA
ATOM   1166  CB  SER A  81      36.310  56.934  35.780  1.00 12.70     0.194 C 
ATOM   1167  HB1 SER A  81      37.173  56.657  35.130  1.00  0.00     0.000 H 
ATOM   1168  HB2 SER A  81      36.804  57.412  36.658  1.00  0.00     0.000 H 
ATOM   1169  OG  SER A  81      35.591  57.972  35.094  1.00 17.58    -0.550 OA
ATOM   1170  HG  SER A  81      35.973  58.785  34.785  1.00  0.00     0.310 HD
ATOM   1171  N   ARG A  82      37.821  54.486  36.426  1.00  8.75    -0.520 N 
ATOM   1172  HN  ARG A  82      37.792  54.507  35.407  1.00  0.00     0.248 HD
ATOM   1173  CA  ARG A  82      38.947  53.896  37.088  1.00  7.35     0.237 C 
ATOM   1174  HA  ARG A  82      38.853  54.060  38.187  1.00  0.00     0.000 H 
ATOM   1175  C   ARG A  82      40.208  54.528  36.604  1.00  8.89     0.526 C 
ATOM   1176  O   ARG A  82      40.491  54.420  35.411  1.00 16.26    -0.500 OA
ATOM   1177  CB  ARG A  82      38.994  52.392  36.807  1.00 10.87     0.049 C 
ATOM   1178  HB1 ARG A  82      38.185  51.858  37.357  1.00  0.00     0.000 H 
ATOM   1179  HB2 ARG A  82      38.678  52.171  35.761  1.00  0.00     0.000 H 
ATOM   1180  CG  ARG A  82      40.332  51.788  37.102  1.00  8.57     0.058 C 
ATOM   1181  HG1 ARG A  82      40.922  51.530  36.192  1.00  0.00     0.000 H 
ATOM   1182  HG2 ARG A  82      41.068  52.507  37.531  1.00  0.00     0.000 H 
ATOM   1183  CD  ARG A  82      40.047  50.654  37.961  1.00 10.68     0.111 C 
ATOM   1184  HD1 ARG A  82      40.850  50.463  38.710  1.00  0.00     0.000 H 
ATOM   1185  HD2 ARG A  82      39.220  50.852  38.682  1.00  0.00     0.000 H 
ATOM   1186  NE  ARG A  82      39.796  49.539  37.124  1.00 14.67    -0.493 N 
ATOM   1187  HE  ARG A  82      38.872  49.432  36.706  1.00  0.00     0.294 HD
ATOM   1188  CZ  ARG A  82      40.735  48.624  36.866  1.00 17.91     0.814 C 
ATOM   1189  NH1 ARG A  82      40.383  47.633  36.046  1.00 21.38    -0.634 N 
ATOM   1190 1HH1 ARG A  82      41.100  46.935  35.849  1.00  0.00     0.361 HD
ATOM   1191 2HH1 ARG A  82      39.452  47.632  35.630  1.00  0.00     0.361 HD
ATOM   1192  NH2 ARG A  82      41.956  48.625  37.412  1.00 14.93    -0.634 N 
ATOM   1193 1HH2 ARG A  82      42.673  47.927  37.215  1.00  0.00     0.361 HD
ATOM   1194 2HH2 ARG A  82      42.225  49.383  38.039  1.00  0.00     0.361 HD
ATOM   1195  N   ILE A  83      40.977  55.198  37.436  1.00  9.64    -0.520 N 
ATOM   1196  HN  ILE A  83      40.680  55.413  38.388  1.00  0.00     0.248 HD
ATOM   1197  CA  ILE A  83      42.256  55.609  36.931  1.00 12.59     0.199 C 
ATOM   1198  HA  ILE A  83      42.260  55.463  35.826  1.00  0.00     0.000 H 
ATOM   1199  C   ILE A  83      43.244  54.603  37.558  1.00 15.71     0.526 C 
ATOM   1200  O   ILE A  83      43.632  54.648  38.722  1.00 16.09    -0.500 OA
ATOM   1201  CB  ILE A  83      42.399  57.176  37.233  1.00 14.11     0.030 C 
ATOM   1202  HB  ILE A  83      41.963  57.700  36.351  1.00  0.00     0.000 H 
ATOM   1203  CG1 ILE A  83      43.912  57.439  37.177  1.00 16.58     0.017 C 
ATOM   1204 1HG1 ILE A  83      44.418  56.538  36.758  1.00  0.00     0.000 H 
ATOM   1205 2HG1 ILE A  83      44.314  57.450  38.217  1.00  0.00     0.000 H 
ATOM   1206  CG2 ILE A  83      41.622  57.664  38.435  1.00 10.57     0.001 C 
ATOM   1207 1HG2 ILE A  83      41.722  58.754  38.645  1.00  0.00     0.000 H 
ATOM   1208 2HG2 ILE A  83      41.895  57.070  39.338  1.00  0.00     0.000 H 
ATOM   1209 3HG2 ILE A  83      40.547  57.386  38.339  1.00  0.00     0.000 H 
ATOM   1210  CD1 ILE A  83      44.432  58.707  36.422  1.00 15.05    -0.001 C 
ATOM   1211 1HD1 ILE A  83      45.530  58.898  36.381  1.00  0.00     0.000 H 
ATOM   1212 2HD1 ILE A  83      43.926  59.608  36.841  1.00  0.00     0.000 H 
ATOM   1213 3HD1 ILE A  83      44.030  58.696  35.382  1.00  0.00     0.000 H 
ATOM   1214  N   ALA A  84      43.456  53.542  36.732  1.00 21.22    -0.520 N 
ATOM   1215  HN  ALA A  84      43.076  53.611  35.788  1.00  0.00     0.248 HD
ATOM   1216  CA  ALA A  84      44.187  52.293  37.071  1.00 22.61     0.215 C 
ATOM   1217  HA  ALA A  84      43.798  51.964  38.063  1.00  0.00     0.000 H 
ATOM   1218  C   ALA A  84      45.715  52.271  37.182  1.00 22.03     0.526 C 
ATOM   1219  O   ALA A  84      46.462  52.965  36.482  1.00 22.71    -0.500 OA
ATOM   1220  CB  ALA A  84      43.888  51.149  36.093  1.00 18.10     0.031 C 
ATOM   1221  HB1 ALA A  84      44.436  50.212  36.347  1.00  0.00     0.000 H 
ATOM   1222  HB2 ALA A  84      44.091  51.458  35.041  1.00  0.00     0.000 H 
ATOM   1223  HB3 ALA A  84      42.791  50.963  36.018  1.00  0.00     0.000 H 
ATOM   1224  N   VAL A  85      46.218  51.398  38.035  1.00 20.35    -0.520 N 
ATOM   1225  HN  VAL A  85      45.608  50.749  38.531  1.00  0.00     0.248 HD
ATOM   1226  CA  VAL A  85      47.641  51.376  38.255  1.00 16.08     0.201 C 
ATOM   1227  HA  VAL A  85      47.952  52.426  38.467  1.00  0.00     0.000 H 
ATOM   1228  C   VAL A  85      48.527  50.872  37.120  1.00 17.42     0.526 C 
ATOM   1229  O   VAL A  85      49.741  50.907  37.261  1.00 22.66    -0.500 OA
ATOM   1230  CB  VAL A  85      47.807  50.617  39.514  1.00 12.69     0.033 C 
ATOM   1231  HB  VAL A  85      46.812  50.607  40.017  1.00  0.00     0.000 H 
ATOM   1232  CG1 VAL A  85      48.237  49.146  39.352  1.00 14.97     0.006 C 
ATOM   1233 1HG1 VAL A  85      48.362  48.574  40.301  1.00  0.00     0.000 H 
ATOM   1234 2HG1 VAL A  85      49.170  49.086  38.745  1.00  0.00     0.000 H 
ATOM   1235 3HG1 VAL A  85      47.527  48.614  38.677  1.00  0.00     0.000 H 
ATOM   1236  CG2 VAL A  85      48.660  51.574  40.271  1.00  8.74     0.006 C 
ATOM   1237 1HG2 VAL A  85      48.785  51.002  41.220  1.00  0.00     0.000 H 
ATOM   1238 2HG2 VAL A  85      48.260  52.610  40.374  1.00  0.00     0.000 H 
ATOM   1239 3HG2 VAL A  85      49.601  51.895  39.766  1.00  0.00     0.000 H 
ATOM   1240  N   SER A  86      48.012  50.414  35.988  1.00 16.93    -0.520 N 
ATOM   1241  HN  SER A  86      46.997  50.346  35.912  1.00  0.00     0.248 HD
ATOM   1242  CA  SER A  86      48.814  50.004  34.851  1.00 15.40     0.292 C 
ATOM   1243  HA  SER A  86      49.894  50.203  35.041  1.00  0.00     0.000 H 
ATOM   1244  C   SER A  86      48.309  50.862  33.720  1.00 17.41     0.526 C 
ATOM   1245  O   SER A  86      49.083  51.659  33.210  1.00 22.86    -0.500 OA
ATOM   1246  CB  SER A  86      48.579  48.538  34.624  1.00 14.37     0.194 C 
ATOM   1247  HB1 SER A  86      49.042  48.165  33.681  1.00  0.00     0.000 H 
ATOM   1248  HB2 SER A  86      49.149  47.892  35.332  1.00  0.00     0.000 H 
ATOM   1249  OG  SER A  86      47.173  48.314  34.678  1.00 18.06    -0.550 OA
ATOM   1250  HG  SER A  86      47.024  47.387  34.534  1.00  0.00     0.310 HD
ATOM   1251  N   TYR A  87      47.043  50.832  33.292  1.00 17.82    -0.520 N 
ATOM   1252  HN  TYR A  87      46.393  50.148  33.679  1.00  0.00     0.248 HD
ATOM   1253  CA  TYR A  87      46.585  51.775  32.272  1.00 19.08     0.245 C 
ATOM   1254  HA  TYR A  87      47.421  51.992  31.567  1.00  0.00     0.000 H 
ATOM   1255  C   TYR A  87      46.276  53.032  33.097  1.00 16.85     0.526 C 
ATOM   1256  O   TYR A  87      45.147  53.352  33.463  1.00 17.82    -0.500 OA
ATOM   1257  CB  TYR A  87      45.275  51.340  31.433  1.00 23.98     0.022 C 
ATOM   1258  HB  TYR A  87      44.993  51.983  30.582  1.00  0.00     0.000 H 
ATOM   1259  CG  TYR A  87      44.368  50.096  31.709  1.00 31.39    -0.001 A 
ATOM   1260  CD1 TYR A  87      43.406  49.648  30.767  1.00 30.44    -0.035 A 
ATOM   1261  HD1 TYR A  87      43.261  50.214  29.832  1.00  0.00     0.000 H 
ATOM   1262  CD2 TYR A  87      44.515  49.352  32.876  1.00 32.60    -0.035 A 
ATOM   1263  HD2 TYR A  87      45.249  49.676  33.633  1.00  0.00     0.000 H 
ATOM   1264  CE1 TYR A  87      42.640  48.506  31.000  1.00 29.64     0.100 A 
ATOM   1265  HE1 TYR A  87      41.893  48.169  30.262  1.00  0.00     0.000 H 
ATOM   1266  CE2 TYR A  87      43.767  48.225  33.106  1.00 32.41     0.100 A 
ATOM   1267  HE2 TYR A  87      43.915  47.656  34.040  1.00  0.00     0.000 H 
ATOM   1268  CZ  TYR A  87      42.839  47.795  32.193  1.00 32.33    -0.121 A 
ATOM   1269  OH  TYR A  87      42.199  46.596  32.529  1.00 32.41    -0.368 OA
ATOM   1270  HH  TYR A  87      42.334  46.115  33.337  1.00  0.00     0.339 HD
ATOM   1271  N   GLN A  88      47.312  53.782  33.458  1.00 16.07    -0.520 N 
ATOM   1272  HN  GLN A  88      48.246  53.532  33.132  1.00  0.00     0.248 HD
ATOM   1273  CA  GLN A  88      47.144  54.955  34.310  1.00 16.48     0.210 C 
ATOM   1274  HA  GLN A  88      46.453  54.688  35.143  1.00  0.00     0.000 H 
ATOM   1275  C   GLN A  88      46.557  56.143  33.560  1.00 15.18     0.526 C 
ATOM   1276  O   GLN A  88      47.226  56.968  32.908  1.00 10.42    -0.500 OA
ATOM   1277  CB  GLN A  88      48.492  55.275  34.896  1.00 16.75     0.053 C 
ATOM   1278  HB1 GLN A  88      49.119  55.912  34.229  1.00  0.00     0.000 H 
ATOM   1279  HB2 GLN A  88      49.173  54.393  34.933  1.00  0.00     0.000 H 
ATOM   1280  CG  GLN A  88      48.250  55.897  36.256  1.00 18.22    -0.043 C 
ATOM   1281  HG1 GLN A  88      47.372  56.582  36.214  1.00  0.00     0.000 H 
ATOM   1282  HG2 GLN A  88      47.865  55.129  36.966  1.00  0.00     0.000 H 
ATOM   1283  CD  GLN A  88      49.451  56.619  36.864  1.00 16.91     0.675 C 
ATOM   1284  OE1 GLN A  88      49.311  57.290  37.877  1.00 16.72    -0.470 OA
ATOM   1285  NE2 GLN A  88      50.649  56.575  36.316  1.00 15.19    -0.867 N 
ATOM   1286 1HE2 GLN A  88      51.451  57.057  36.722  1.00  0.00     0.344 HD
ATOM   1287 2HE2 GLN A  88      50.766  56.015  35.471  1.00  0.00     0.344 HD
ATOM   1288  N   THR A  89      45.241  56.084  33.631  1.00 14.13    -0.520 N 
ATOM   1289  HN  THR A  89      44.815  55.339  34.183  1.00  0.00     0.248 HD
ATOM   1290  CA  THR A  89      44.385  57.019  32.968  1.00 13.34     0.268 C 
ATOM   1291  HA  THR A  89      44.651  58.059  33.268  1.00  0.00     0.000 H 
ATOM   1292  C   THR A  89      42.952  56.694  33.410  1.00 13.39     0.526 C 
ATOM   1293  O   THR A  89      42.663  55.561  33.821  1.00 14.38    -0.500 OA
ATOM   1294  CB  THR A  89      44.571  56.844  31.448  1.00 12.80     0.211 C 
ATOM   1295  HB  THR A  89      45.661  56.847  31.216  1.00  0.00     0.000 H 
ATOM   1296  OG1 THR A  89      43.986  58.010  30.907  1.00 17.79    -0.550 OA
ATOM   1297  HG1 THR A  89      44.101  57.902  29.970  1.00  0.00     0.310 HD
ATOM   1298  CG2 THR A  89      43.935  55.611  30.816  1.00 10.33     0.007 C 
ATOM   1299 1HG2 THR A  89      44.070  55.484  29.716  1.00  0.00     0.000 H 
ATOM   1300 2HG2 THR A  89      42.849  55.582  31.065  1.00  0.00     0.000 H 
ATOM   1301 3HG2 THR A  89      44.291  54.695  31.344  1.00  0.00     0.000 H 
ATOM   1302  N   LYS A  90      42.039  57.655  33.250  1.00 10.53    -0.520 N 
ATOM   1303  HN  LYS A  90      42.299  58.529  32.792  1.00  0.00     0.248 HD
ATOM   1304  CA  LYS A  90      40.681  57.466  33.722  1.00 12.15     0.227 C 
ATOM   1305  HA  LYS A  90      40.733  56.949  34.709  1.00  0.00     0.000 H 
ATOM   1306  C   LYS A  90      39.834  56.597  32.784  1.00 10.37     0.526 C 
ATOM   1307  O   LYS A  90      39.169  57.126  31.916  1.00  8.16    -0.500 OA
ATOM   1308  CB  LYS A  90      40.104  58.922  33.970  1.00 14.76     0.039 C 
ATOM   1309  HB1 LYS A  90      39.947  59.437  32.994  1.00  0.00     0.000 H 
ATOM   1310  HB2 LYS A  90      40.895  59.570  34.415  1.00  0.00     0.000 H 
ATOM   1311  CG  LYS A  90      38.822  59.009  34.817  1.00 13.21     0.053 C 
ATOM   1312  HG1 LYS A  90      38.585  57.991  35.206  1.00  0.00     0.000 H 
ATOM   1313  HG2 LYS A  90      37.959  59.192  34.135  1.00  0.00     0.000 H 
ATOM   1314  CD  LYS A  90      38.743  60.005  35.980  1.00 12.07     0.048 C 
ATOM   1315  HD1 LYS A  90      39.653  59.893  36.614  1.00  0.00     0.000 H 
ATOM   1316  HD2 LYS A  90      37.946  59.673  36.686  1.00  0.00     0.000 H 
ATOM   1317  CE  LYS A  90      38.534  61.526  35.657  1.00 16.46     0.218 C 
ATOM   1318  HE1 LYS A  90      39.321  61.864  34.943  1.00  0.00     0.000 H 
ATOM   1319  HE2 LYS A  90      38.793  62.134  36.555  1.00  0.00     0.000 H 
ATOM   1320  NZ  LYS A  90      37.219  61.933  35.158  1.00 16.67    -0.272 N 
ATOM   1321  HZ1 LYS A  90      37.083  62.922  34.948  1.00  0.00     0.311 HD
ATOM   1322  HZ2 LYS A  90      36.499  61.624  35.811  1.00  0.00     0.311 HD
ATOM   1323  HZ3 LYS A  90      36.982  61.377  34.336  1.00  0.00     0.311 HD
ATOM   1324  N   VAL A  91      39.805  55.266  32.849  1.00  8.51    -0.520 N 
ATOM   1325  HN  VAL A  91      40.376  54.768  33.532  1.00  0.00     0.248 HD
ATOM   1326  CA  VAL A  91      38.949  54.538  31.933  1.00  7.20     0.201 C 
ATOM   1327  HA  VAL A  91      38.937  55.070  30.953  1.00  0.00     0.000 H 
ATOM   1328  C   VAL A  91      37.549  54.537  32.503  1.00  9.58     0.526 C 
ATOM   1329  O   VAL A  91      37.389  54.999  33.622  1.00 13.50    -0.500 OA
ATOM   1330  CB  VAL A  91      39.567  53.154  31.735  1.00  6.37     0.033 C 
ATOM   1331  HB  VAL A  91      39.817  52.697  32.721  1.00  0.00     0.000 H 
ATOM   1332  CG1 VAL A  91      38.815  52.178  30.884  1.00  3.12     0.006 C 
ATOM   1333 1HG1 VAL A  91      39.266  51.168  30.740  1.00  0.00     0.000 H 
ATOM   1334 2HG1 VAL A  91      38.611  52.637  29.889  1.00  0.00     0.000 H 
ATOM   1335 3HG1 VAL A  91      37.778  52.066  31.279  1.00  0.00     0.000 H 
ATOM   1336  CG2 VAL A  91      40.820  53.442  30.962  1.00  8.49     0.006 C 
ATOM   1337 1HG2 VAL A  91      41.271  52.432  30.818  1.00  0.00     0.000 H 
ATOM   1338 2HG2 VAL A  91      41.498  54.188  31.440  1.00  0.00     0.000 H 
ATOM   1339 3HG2 VAL A  91      40.661  54.017  30.020  1.00  0.00     0.000 H 
ATOM   1340  N   ASN A  92      36.498  54.016  31.897  1.00 11.71    -0.520 N 
ATOM   1341  HN  ASN A  92      36.641  53.390  31.105  1.00  0.00     0.248 HD
ATOM   1342  CA  ASN A  92      35.137  54.312  32.331  1.00 12.59     0.217 C 
ATOM   1343  HA  ASN A  92      35.182  54.999  33.208  1.00  0.00     0.000 H 
ATOM   1344  C   ASN A  92      34.364  53.055  32.732  1.00 11.27     0.526 C 
ATOM   1345  O   ASN A  92      34.160  52.142  31.953  1.00 11.82    -0.500 OA
ATOM   1346  CB  ASN A  92      34.561  55.080  31.132  1.00 14.02     0.003 C 
ATOM   1347  HB1 ASN A  92      35.369  55.689  30.663  1.00  0.00     0.000 H 
ATOM   1348  HB2 ASN A  92      34.335  54.362  30.310  1.00  0.00     0.000 H 
ATOM   1349  CG  ASN A  92      33.358  55.953  31.374  1.00 13.85     0.675 C 
ATOM   1350  OD1 ASN A  92      33.501  57.162  31.535  1.00 16.18    -0.470 OA
ATOM   1351  ND2 ASN A  92      32.127  55.448  31.430  1.00 16.40    -0.867 N 
ATOM   1352 1HD2 ASN A  92      32.008  54.444  31.296  1.00  0.00     0.344 HD
ATOM   1353 2HD2 ASN A  92      31.312  56.039  31.594  1.00  0.00     0.344 HD
ATOM   1354  N   LEU A  93      33.889  52.943  33.940  1.00 14.21    -0.520 N 
ATOM   1355  HN  LEU A  93      33.935  53.744  34.570  1.00  0.00     0.248 HD
ATOM   1356  CA  LEU A  93      33.291  51.695  34.413  1.00 15.17     0.204 C 
ATOM   1357  HA  LEU A  93      33.749  50.890  33.793  1.00  0.00     0.000 H 
ATOM   1358  C   LEU A  93      31.784  51.445  34.360  1.00 12.41     0.526 C 
ATOM   1359  O   LEU A  93      31.321  50.363  33.992  1.00 10.14    -0.500 OA
ATOM   1360  CB  LEU A  93      33.826  51.470  35.844  1.00 14.17     0.016 C 
ATOM   1361  HB1 LEU A  93      33.217  50.727  36.410  1.00  0.00     0.000 H 
ATOM   1362  HB2 LEU A  93      33.652  52.352  36.503  1.00  0.00     0.000 H 
ATOM   1363  CG  LEU A  93      35.313  51.076  35.777  1.00 15.94     0.054 C 
ATOM   1364  HG  LEU A  93      35.881  51.881  35.255  1.00  0.00     0.000 H 
ATOM   1365  CD1 LEU A  93      35.915  50.851  37.138  1.00 12.80    -0.014 C 
ATOM   1366 1HD1 LEU A  93      36.992  50.566  37.089  1.00  0.00     0.000 H 
ATOM   1367 2HD1 LEU A  93      35.328  50.100  37.716  1.00  0.00     0.000 H 
ATOM   1368 3HD1 LEU A  93      35.766  51.740  37.794  1.00  0.00     0.000 H 
ATOM   1369  CD2 LEU A  93      35.413  49.799  34.976  1.00  9.84    -0.014 C 
ATOM   1370 1HD2 LEU A  93      36.490  49.514  34.927  1.00  0.00     0.000 H 
ATOM   1371 2HD2 LEU A  93      34.940  49.880  33.969  1.00  0.00     0.000 H 
ATOM   1372 3HD2 LEU A  93      34.766  48.984  35.377  1.00  0.00     0.000 H 
ATOM   1373  N   LEU A  94      31.006  52.455  34.726  1.00  8.92    -0.520 N 
ATOM   1374  HN  LEU A  94      31.447  53.323  35.030  1.00  0.00     0.248 HD
ATOM   1375  CA  LEU A  94      29.572  52.385  34.714  1.00  8.28     0.204 C 
ATOM   1376  HA  LEU A  94      29.213  51.689  33.920  1.00  0.00     0.000 H 
ATOM   1377  C   LEU A  94      29.237  53.831  34.365  1.00 11.00     0.526 C 
ATOM   1378  O   LEU A  94      30.020  54.755  34.668  1.00 14.39    -0.500 OA
ATOM   1379  CB  LEU A  94      29.104  51.916  36.115  1.00  5.85     0.016 C 
ATOM   1380  HB1 LEU A  94      29.374  52.707  36.853  1.00  0.00     0.000 H 
ATOM   1381  HB2 LEU A  94      27.990  51.953  36.139  1.00  0.00     0.000 H 
ATOM   1382  CG  LEU A  94      29.555  50.543  36.690  1.00  5.32     0.054 C 
ATOM   1383  HG  LEU A  94      30.586  50.328  36.324  1.00  0.00     0.000 H 
ATOM   1384  CD1 LEU A  94      29.572  50.532  38.220  1.00  5.10    -0.014 C 
ATOM   1385 1HD1 LEU A  94      29.895  49.548  38.632  1.00  0.00     0.000 H 
ATOM   1386 2HD1 LEU A  94      28.584  50.838  38.636  1.00  0.00     0.000 H 
ATOM   1387 3HD1 LEU A  94      30.198  51.362  38.622  1.00  0.00     0.000 H 
ATOM   1388  CD2 LEU A  94      28.658  49.489  36.199  1.00  2.67    -0.014 C 
ATOM   1389 1HD2 LEU A  94      28.981  48.505  36.611  1.00  0.00     0.000 H 
ATOM   1390 2HD2 LEU A  94      28.590  49.478  35.086  1.00  0.00     0.000 H 
ATOM   1391 3HD2 LEU A  94      27.588  49.708  36.422  1.00  0.00     0.000 H 
ATOM   1392  N   SER A  95      28.118  54.072  33.703  1.00  9.28    -0.520 N 
ATOM   1393  HN  SER A  95      27.496  53.292  33.491  1.00  0.00     0.248 HD
ATOM   1394  CA  SER A  95      27.744  55.399  33.269  1.00  9.93     0.292 C 
ATOM   1395  HA  SER A  95      27.900  56.126  34.100  1.00  0.00     0.000 H 
ATOM   1396  C   SER A  95      26.267  55.355  32.894  1.00  6.67     0.526 C 
ATOM   1397  O   SER A  95      25.714  54.325  32.508  1.00  5.70    -0.500 OA
ATOM   1398  CB  SER A  95      28.603  55.794  32.069  1.00 10.67     0.194 C 
ATOM   1399  HB1 SER A  95      28.366  55.145  31.194  1.00  0.00     0.000 H 
ATOM   1400  HB2 SER A  95      29.666  55.504  32.243  1.00  0.00     0.000 H 
ATOM   1401  OG  SER A  95      28.521  57.153  31.705  1.00 17.33    -0.550 OA
ATOM   1402  HG  SER A  95      29.055  57.399  30.959  1.00  0.00     0.310 HD
ATOM   1403  N   ALA A  96      25.565  56.457  33.080  1.00  7.57    -0.520 N 
ATOM   1404  HN  ALA A  96      25.999  57.273  33.513  1.00  0.00     0.248 HD
ATOM   1405  CA  ALA A  96      24.163  56.506  32.664  1.00  9.68     0.215 C 
ATOM   1406  HA  ALA A  96      24.003  55.854  31.774  1.00  0.00     0.000 H 
ATOM   1407  C   ALA A  96      23.888  57.946  32.311  1.00  9.20     0.526 C 
ATOM   1408  O   ALA A  96      24.537  58.849  32.879  1.00 13.95    -0.500 OA
ATOM   1409  CB  ALA A  96      23.229  56.092  33.794  1.00  7.16     0.031 C 
ATOM   1410  HB1 ALA A  96      22.161  56.129  33.477  1.00  0.00     0.000 H 
ATOM   1411  HB2 ALA A  96      23.404  56.702  34.711  1.00  0.00     0.000 H 
ATOM   1412  HB3 ALA A  96      23.499  55.089  34.199  1.00  0.00     0.000 H 
ATOM   1413  N   ILE A  97      23.080  58.195  31.286  1.00 10.59    -0.520 N 
ATOM   1414  HN  ILE A  97      22.739  57.438  30.693  1.00  0.00     0.248 HD
ATOM   1415  CA  ILE A  97      22.695  59.572  31.032  1.00 12.05     0.199 C 
ATOM   1416  HA  ILE A  97      23.170  60.232  31.795  1.00  0.00     0.000 H 
ATOM   1417  C   ILE A  97      21.183  59.568  31.243  1.00  9.44     0.526 C 
ATOM   1418  O   ILE A  97      20.505  58.529  31.141  1.00  9.07    -0.500 OA
ATOM   1419  CB  ILE A  97      23.105  60.069  29.590  1.00 10.90     0.030 C 
ATOM   1420  HB  ILE A  97      22.328  59.771  28.848  1.00  0.00     0.000 H 
ATOM   1421  CG1 ILE A  97      24.481  59.560  29.145  1.00  8.16     0.017 C 
ATOM   1422 1HG1 ILE A  97      25.153  59.467  30.030  1.00  0.00     0.000 H 
ATOM   1423 2HG1 ILE A  97      24.405  58.491  28.836  1.00  0.00     0.000 H 
ATOM   1424  CG2 ILE A  97      23.204  61.618  29.664  1.00  8.93     0.001 C 
ATOM   1425 1HG2 ILE A  97      23.493  61.969  28.646  1.00  0.00     0.000 H 
ATOM   1426 2HG2 ILE A  97      23.891  61.978  30.465  1.00  0.00     0.000 H 
ATOM   1427 3HG2 ILE A  97      22.275  62.101  30.049  1.00  0.00     0.000 H 
ATOM   1428  CD1 ILE A  97      25.180  60.368  28.048  1.00  8.02    -0.001 C 
ATOM   1429 1HD1 ILE A  97      26.181  59.998  27.724  1.00  0.00     0.000 H 
ATOM   1430 2HD1 ILE A  97      25.256  61.437  28.357  1.00  0.00     0.000 H 
ATOM   1431 3HD1 ILE A  97      24.508  60.461  27.163  1.00  0.00     0.000 H 
ATOM   1432  N   LYS A  98      20.651  60.693  31.653  1.00  7.90    -0.520 N 
ATOM   1433  HN  LYS A  98      21.216  61.540  31.720  1.00  0.00     0.248 HD
ATOM   1434  CA  LYS A  98      19.251  60.715  32.009  1.00 15.14     0.227 C 
ATOM   1435  HA  LYS A  98      18.730  59.851  31.536  1.00  0.00     0.000 H 
ATOM   1436  C   LYS A  98      18.671  62.009  31.484  1.00 16.36     0.526 C 
ATOM   1437  O   LYS A  98      19.250  63.086  31.666  1.00 14.21    -0.500 OA
ATOM   1438  CB  LYS A  98      19.091  60.643  33.537  1.00 14.43     0.039 C 
ATOM   1439  HB1 LYS A  98      19.432  61.589  34.019  1.00  0.00     0.000 H 
ATOM   1440  HB2 LYS A  98      19.830  59.936  33.982  1.00  0.00     0.000 H 
ATOM   1441  CG  LYS A  98      17.692  60.297  33.963  1.00 15.78     0.053 C 
ATOM   1442  HG1 LYS A  98      17.455  60.745  34.956  1.00  0.00     0.000 H 
ATOM   1443  HG2 LYS A  98      16.940  60.834  33.338  1.00  0.00     0.000 H 
ATOM   1444  CD  LYS A  98      17.428  58.787  33.964  1.00 15.99     0.048 C 
ATOM   1445  HD1 LYS A  98      17.339  58.416  32.916  1.00  0.00     0.000 H 
ATOM   1446  HD2 LYS A  98      18.344  58.242  34.291  1.00  0.00     0.000 H 
ATOM   1447  CE  LYS A  98      16.194  58.311  34.806  1.00 16.30     0.218 C 
ATOM   1448  HE1 LYS A  98      15.291  58.885  34.493  1.00  0.00     0.000 H 
ATOM   1449  HE2 LYS A  98      15.907  57.281  34.490  1.00  0.00     0.000 H 
ATOM   1450  NZ  LYS A  98      16.314  58.354  36.264  1.00 11.50    -0.272 N 
ATOM   1451  HZ1 LYS A  98      15.511  58.044  36.812  1.00  0.00     0.311 HD
ATOM   1452  HZ2 LYS A  98      16.576  59.296  36.553  1.00  0.00     0.311 HD
ATOM   1453  HZ3 LYS A  98      17.140  57.829  36.550  1.00  0.00     0.311 HD
ATOM   1454  N   SER A  99      17.557  61.932  30.769  1.00 20.87    -0.520 N 
ATOM   1455  HN  SER A  99      17.115  61.034  30.574  1.00  0.00     0.248 HD
ATOM   1456  CA  SER A  99      16.989  63.174  30.274  1.00 26.46     0.292 C 
ATOM   1457  HA  SER A  99      17.756  63.983  30.261  1.00  0.00     0.000 H 
ATOM   1458  C   SER A  99      15.958  63.432  31.338  1.00 27.39     0.526 C 
ATOM   1459  O   SER A  99      15.141  62.527  31.589  1.00 29.51    -0.500 OA
ATOM   1460  CB  SER A  99      16.275  63.065  28.892  1.00 29.18     0.194 C 
ATOM   1461  HB1 SER A  99      16.992  62.603  28.174  1.00  0.00     0.000 H 
ATOM   1462  HB2 SER A  99      16.166  64.096  28.483  1.00  0.00     0.000 H 
ATOM   1463  OG  SER A  99      15.005  62.394  28.740  1.00 34.35    -0.550 OA
ATOM   1464  HG  SER A  99      14.570  62.328  27.898  1.00  0.00     0.310 HD
ATOM   1465  N   PRO A 100      16.001  64.593  32.001  1.00 24.85    -0.257 N 
ATOM   1466  CA  PRO A 100      14.959  64.992  32.938  1.00 26.16     0.112 C 
ATOM   1467  HA  PRO A 100      14.769  64.168  33.665  1.00  0.00     0.000 H 
ATOM   1468  C   PRO A 100      13.695  65.275  32.138  1.00 26.83     0.526 C 
ATOM   1469  O   PRO A 100      13.125  64.362  31.543  1.00 30.31    -0.500 OA
ATOM   1470  CB  PRO A 100      15.569  66.178  33.654  1.00 22.56    -0.001 C 
ATOM   1471  HB1 PRO A 100      16.084  65.933  34.612  1.00  0.00     0.000 H 
ATOM   1472  HB2 PRO A 100      14.832  66.884  34.104  1.00  0.00     0.000 H 
ATOM   1473  CG  PRO A 100      16.450  66.774  32.600  1.00 22.91     0.036 C 
ATOM   1474  HG1 PRO A 100      15.929  67.498  31.931  1.00  0.00     0.000 H 
ATOM   1475  HG2 PRO A 100      17.208  67.489  32.996  1.00  0.00     0.000 H 
ATOM   1476  CD  PRO A 100      17.047  65.584  31.872  1.00 23.37     0.084 C 
ATOM   1477  HD1 PRO A 100      17.377  65.788  30.827  1.00  0.00     0.000 H 
ATOM   1478  HD2 PRO A 100      18.050  65.262  32.238  1.00  0.00     0.000 H 
ATOM   1479  N   CYS A 101      13.245  66.502  32.026  1.00 26.06    -0.520 N 
ATOM   1480  HN  CYS A 101      13.727  67.263  32.504  1.00  0.00     0.248 HD
ATOM   1481  CA  CYS A 101      12.076  66.782  31.234  1.00 31.15     0.088 C 
ATOM   1482  HA  CYS A 101      11.313  65.993  31.430  1.00  0.00     0.000 H 
ATOM   1483  C   CYS A 101      12.346  66.843  29.726  1.00 30.89     0.526 C 
ATOM   1484  O   CYS A 101      13.351  67.345  29.206  1.00 29.63    -0.500 OA
ATOM   1485  CB  CYS A 101      11.555  68.061  31.691  1.00 35.98     0.143 C 
ATOM   1486  HB1 CYS A 101      10.995  68.020  32.654  1.00  0.00     0.000 H 
ATOM   1487  HB2 CYS A 101      10.708  68.463  31.088  1.00  0.00     0.000 H 
ATOM   1488  SG  CYS A 101      13.037  69.110  31.716  1.00 40.84     0.015 SA
ATOM   1489  N   GLN A 102      11.407  66.268  29.018  1.00 31.44    -0.520 N 
ATOM   1490  HN  GLN A 102      10.657  65.791  29.518  1.00  0.00     0.248 HD
ATOM   1491  CA  GLN A 102      11.365  66.265  27.581  1.00 36.75     0.210 C 
ATOM   1492  HA  GLN A 102      12.321  66.576  27.099  1.00  0.00     0.000 H 
ATOM   1493  C   GLN A 102      10.285  67.334  27.557  1.00 39.55     0.526 C 
ATOM   1494  O   GLN A 102       9.124  66.999  27.787  1.00 39.22    -0.500 OA
ATOM   1495  CB  GLN A 102      10.891  64.881  27.173  1.00 37.59     0.053 C 
ATOM   1496  HB1 GLN A 102      11.700  64.160  27.436  1.00  0.00     0.000 H 
ATOM   1497  HB2 GLN A 102      10.074  64.588  27.872  1.00  0.00     0.000 H 
ATOM   1498  CG  GLN A 102      10.423  64.548  25.756  1.00 41.52    -0.043 C 
ATOM   1499  HG1 GLN A 102       9.613  63.782  25.798  1.00  0.00     0.000 H 
ATOM   1500  HG2 GLN A 102       9.862  65.414  25.333  1.00  0.00     0.000 H 
ATOM   1501  CD  GLN A 102      11.501  64.103  24.772  1.00 43.97     0.675 C 
ATOM   1502  OE1 GLN A 102      11.507  64.503  23.608  1.00 45.39    -0.470 OA
ATOM   1503  NE2 GLN A 102      12.479  63.288  25.156  1.00 47.11    -0.867 N 
ATOM   1504 1HE2 GLN A 102      12.474  62.957  26.121  1.00  0.00     0.344 HD
ATOM   1505 2HE2 GLN A 102      13.200  62.991  24.498  1.00  0.00     0.344 HD
ATOM   1506  N   ARG A 103      10.714  68.600  27.465  1.00 42.96    -0.520 N 
ATOM   1507  HN  ARG A 103      11.724  68.734  27.414  1.00  0.00     0.248 HD
ATOM   1508  CA  ARG A 103       9.886  69.824  27.429  1.00 44.21     0.237 C 
ATOM   1509  HA  ARG A 103      10.597  70.680  27.365  1.00  0.00     0.000 H 
ATOM   1510  C   ARG A 103       8.947  70.132  28.602  1.00 45.47     0.526 C 
ATOM   1511  O   ARG A 103       8.905  69.462  29.641  1.00 43.91    -0.500 OA
ATOM   1512  CB  ARG A 103       9.060  69.846  26.115  1.00 46.24     0.049 C 
ATOM   1513  HB1 ARG A 103       8.776  68.809  25.819  1.00  0.00     0.000 H 
ATOM   1514  HB2 ARG A 103       8.048  70.277  26.301  1.00  0.00     0.000 H 
ATOM   1515  CG  ARG A 103       9.745  70.574  24.934  1.00 47.34     0.058 C 
ATOM   1516  HG1 ARG A 103      10.796  70.222  24.814  1.00  0.00     0.000 H 
ATOM   1517  HG2 ARG A 103       9.932  71.643  25.189  1.00  0.00     0.000 H 
ATOM   1518  CD  ARG A 103       8.982  70.462  23.599  1.00 46.46     0.111 C 
ATOM   1519  HD1 ARG A 103       8.682  69.409  23.387  1.00  0.00     0.000 H 
ATOM   1520  HD2 ARG A 103       7.967  70.919  23.668  1.00  0.00     0.000 H 
ATOM   1521  NE  ARG A 103       9.756  71.035  22.491  1.00 49.95    -0.493 N 
ATOM   1522  HE  ARG A 103      10.476  71.716  22.731  1.00  0.00     0.294 HD
ATOM   1523  CZ  ARG A 103       9.599  70.739  21.176  1.00 48.95     0.814 C 
ATOM   1524  NH1 ARG A 103      10.392  71.369  20.301  1.00 46.53    -0.634 N 
ATOM   1525 1HH1 ARG A 103      11.070  72.044  20.653  1.00  0.00     0.361 HD
ATOM   1526 2HH1 ARG A 103      10.274  71.147  19.313  1.00  0.00     0.361 HD
ATOM   1527  NH2 ARG A 103       8.702  69.846  20.710  1.00 47.01    -0.634 N 
ATOM   1528 1HH2 ARG A 103       8.098  69.366  21.377  1.00  0.00     0.361 HD
ATOM   1529 2HH2 ARG A 103       8.584  69.624  19.722  1.00  0.00     0.361 HD
ATOM   1530  N   GLU A 104       8.411  71.347  28.458  1.00 51.33    -0.520 N 
ATOM   1531  HN  GLU A 104       8.792  71.893  27.686  1.00  0.00     0.248 HD
ATOM   1532  CA  GLU A 104       7.350  72.032  29.240  1.00 55.09     0.246 C 
ATOM   1533  HA  GLU A 104       6.376  71.971  28.700  1.00  0.00     0.000 H 
ATOM   1534  C   GLU A 104       7.869  73.467  29.225  1.00 55.42     0.526 C 
ATOM   1535  O   GLU A 104       7.146  74.302  28.687  1.00 58.83    -0.500 OA
ATOM   1536  CB  GLU A 104       7.158  71.610  30.766  1.00 56.79     0.000 C 
ATOM   1537  HB1 GLU A 104       7.223  70.499  30.840  1.00  0.00     0.000 H 
ATOM   1538  HB2 GLU A 104       8.062  71.922  31.339  1.00  0.00     0.000 H 
ATOM   1539  CG  GLU A 104       5.881  72.091  31.542  1.00 55.36    -0.208 C 
ATOM   1540  HG1 GLU A 104       6.175  72.254  32.605  1.00  0.00     0.000 H 
ATOM   1541  HG2 GLU A 104       5.650  73.126  31.199  1.00  0.00     0.000 H 
ATOM   1542  CD  GLU A 104       4.548  71.288  31.542  1.00 56.00     0.620 C 
ATOM   1543  OE1 GLU A 104       3.475  71.883  31.711  1.00 53.86    -0.706 OA
ATOM   1544  OE2 GLU A 104       4.560  70.066  31.403  1.00 55.80    -0.706 OA
ATOM   1545  N   THR A 105       9.084  73.802  29.713  1.00 54.09    -0.520 N 
ATOM   1546  HN  THR A 105       9.632  73.078  30.178  1.00  0.00     0.248 HD
ATOM   1547  CA  THR A 105       9.663  75.155  29.611  1.00 54.66     0.268 C 
ATOM   1548  HA  THR A 105      10.624  75.141  30.177  1.00  0.00     0.000 H 
ATOM   1549  C   THR A 105       8.826  76.341  30.167  1.00 56.92     0.526 C 
ATOM   1550  O   THR A 105       8.664  77.426  29.586  1.00 56.87    -0.500 OA
ATOM   1551  CB  THR A 105      10.018  75.438  28.118  1.00 54.37     0.211 C 
ATOM   1552  HB  THR A 105       9.227  76.097  27.690  1.00  0.00     0.000 H 
ATOM   1553  OG1 THR A 105      10.019  74.198  27.383  1.00 54.63    -0.550 OA
ATOM   1554  HG1 THR A 105      10.235  74.370  26.474  1.00  0.00     0.310 HD
ATOM   1555  CG2 THR A 105      11.358  76.176  28.026  1.00 52.45     0.007 C 
ATOM   1556 1HG2 THR A 105      11.612  76.378  26.959  1.00  0.00     0.000 H 
ATOM   1557 2HG2 THR A 105      12.174  75.627  28.552  1.00  0.00     0.000 H 
ATOM   1558 3HG2 THR A 105      11.365  77.107  28.640  1.00  0.00     0.000 H 
ATOM   1559  N   PRO A 106       8.260  76.207  31.363  1.00 57.72    -0.257 N 
ATOM   1560  CA  PRO A 106       6.844  75.860  31.572  1.00 59.10     0.112 C 
ATOM   1561  HA  PRO A 106       6.576  75.109  30.792  1.00  0.00     0.000 H 
ATOM   1562  C   PRO A 106       5.756  76.957  31.533  1.00 60.28     0.526 C 
ATOM   1563  O   PRO A 106       4.550  76.675  31.474  1.00 58.11    -0.500 OA
ATOM   1564  CB  PRO A 106       6.920  75.120  32.887  1.00 58.40    -0.001 C 
ATOM   1565  HB1 PRO A 106       6.297  74.196  32.921  1.00  0.00     0.000 H 
ATOM   1566  HB2 PRO A 106       6.415  75.647  33.730  1.00  0.00     0.000 H 
ATOM   1567  CG  PRO A 106       8.407  74.870  33.118  1.00 57.92     0.036 C 
ATOM   1568  HG1 PRO A 106       8.687  74.604  34.164  1.00  0.00     0.000 H 
ATOM   1569  HG2 PRO A 106       8.807  73.934  32.664  1.00  0.00     0.000 H 
ATOM   1570  CD  PRO A 106       9.016  76.150  32.595  1.00 56.56     0.084 C 
ATOM   1571  HD1 PRO A 106       8.973  77.043  33.261  1.00  0.00     0.000 H 
ATOM   1572  HD2 PRO A 106      10.127  76.188  32.512  1.00  0.00     0.000 H 
ATOM   1573  N   GLU A 107       6.230  78.212  31.605  1.00 61.59    -0.520 N 
ATOM   1574  HN  GLU A 107       7.243  78.290  31.691  1.00  0.00     0.248 HD
ATOM   1575  CA  GLU A 107       5.506  79.486  31.578  1.00 62.94     0.246 C 
ATOM   1576  HA  GLU A 107       6.018  80.122  32.337  1.00  0.00     0.000 H 
ATOM   1577  C   GLU A 107       4.003  79.669  31.860  1.00 62.77     0.526 C 
ATOM   1578  O   GLU A 107       3.652  80.756  32.324  1.00 63.36    -0.500 OA
ATOM   1579  CB  GLU A 107       5.840  80.146  30.218  1.00 64.78     0.000 C 
ATOM   1580  HB1 GLU A 107       6.880  79.906  29.897  1.00  0.00     0.000 H 
ATOM   1581  HB2 GLU A 107       5.281  79.659  29.385  1.00  0.00     0.000 H 
ATOM   1582  CG  GLU A 107       5.600  81.663  30.238  1.00 69.51    -0.208 C 
ATOM   1583  HG1 GLU A 107       5.970  82.078  31.205  1.00  0.00     0.000 H 
ATOM   1584  HG2 GLU A 107       4.506  81.858  30.327  1.00  0.00     0.000 H 
ATOM   1585  CD  GLU A 107       6.166  82.500  29.084  1.00 73.36     0.620 C 
ATOM   1586  OE1 GLU A 107       7.185  82.130  28.481  1.00 76.19    -0.706 OA
ATOM   1587  OE2 GLU A 107       5.589  83.555  28.798  1.00 74.82    -0.706 OA
ATOM   1588  N   GLY A 108       3.043  78.774  31.596  1.00 62.68    -0.520 N 
ATOM   1589  HN  GLY A 108       3.290  77.922  31.093  1.00  0.00     0.248 HD
ATOM   1590  CA  GLY A 108       1.646  78.976  32.005  1.00 61.43     0.246 C 
ATOM   1591  HA1 GLY A 108       0.952  78.256  31.511  1.00  0.00     0.000 H 
ATOM   1592  HA2 GLY A 108       1.217  79.918  31.592  1.00  0.00     0.000 H 
ATOM   1593  C   GLY A 108       1.553  78.916  33.532  1.00 61.07     0.526 C 
ATOM   1594  O   GLY A 108       0.889  79.724  34.186  1.00 59.42    -0.500 OA
ATOM   1595  N   ALA A 109       2.238  77.895  34.064  1.00 60.25    -0.520 N 
ATOM   1596  HN  ALA A 109       2.666  77.230  33.420  1.00  0.00     0.248 HD
ATOM   1597  CA  ALA A 109       2.420  77.660  35.489  1.00 59.04     0.215 C 
ATOM   1598  HA  ALA A 109       2.401  78.610  36.073  1.00  0.00     0.000 H 
ATOM   1599  C   ALA A 109       3.810  77.049  35.445  1.00 57.41     0.526 C 
ATOM   1600  O   ALA A 109       4.014  75.917  35.004  1.00 56.35    -0.500 OA
ATOM   1601  CB  ALA A 109       1.411  76.637  36.027  1.00 60.10     0.031 C 
ATOM   1602  HB1 ALA A 109       0.391  77.085  36.059  1.00  0.00     0.000 H 
ATOM   1603  HB2 ALA A 109       1.719  76.229  37.018  1.00  0.00     0.000 H 
ATOM   1604  HB3 ALA A 109       1.430  75.686  35.445  1.00  0.00     0.000 H 
ATOM   1605  N   GLU A 110       4.785  77.858  35.830  1.00 57.09    -0.520 N 
ATOM   1606  HN  GLU A 110       4.554  78.759  36.250  1.00  0.00     0.248 HD
ATOM   1607  CA  GLU A 110       6.197  77.478  35.662  1.00 57.21     0.246 C 
ATOM   1608  HA  GLU A 110       6.307  77.198  34.588  1.00  0.00     0.000 H 
ATOM   1609  C   GLU A 110       6.839  76.321  36.463  1.00 52.71     0.526 C 
ATOM   1610  O   GLU A 110       6.828  75.169  36.037  1.00 49.55    -0.500 OA
ATOM   1611  CB  GLU A 110       7.013  78.798  35.838  1.00 58.92     0.000 C 
ATOM   1612  HB1 GLU A 110       6.677  79.263  36.794  1.00  0.00     0.000 H 
ATOM   1613  HB2 GLU A 110       6.639  79.516  35.072  1.00  0.00     0.000 H 
ATOM   1614  CG  GLU A 110       8.555  78.878  35.815  1.00 60.51    -0.208 C 
ATOM   1615  HG1 GLU A 110       8.944  78.932  34.772  1.00  0.00     0.000 H 
ATOM   1616  HG2 GLU A 110       9.018  77.911  36.123  1.00  0.00     0.000 H 
ATOM   1617  CD  GLU A 110       9.080  80.059  36.679  1.00 62.01     0.620 C 
ATOM   1618  OE1 GLU A 110       8.730  81.223  36.414  1.00 64.02    -0.706 OA
ATOM   1619  OE2 GLU A 110       9.823  79.819  37.638  1.00 60.40    -0.706 OA
ATOM   1620  N   ALA A 111       7.370  76.521  37.661  1.00 49.80    -0.520 N 
ATOM   1621  HN  ALA A 111       7.164  77.368  38.191  1.00  0.00     0.248 HD
ATOM   1622  CA  ALA A 111       8.248  75.508  38.196  1.00 47.29     0.215 C 
ATOM   1623  HA  ALA A 111       8.735  75.008  37.327  1.00  0.00     0.000 H 
ATOM   1624  C   ALA A 111       7.611  74.412  39.040  1.00 45.18     0.526 C 
ATOM   1625  O   ALA A 111       7.563  74.462  40.268  1.00 43.21    -0.500 OA
ATOM   1626  CB  ALA A 111       9.352  76.237  38.968  1.00 45.91     0.031 C 
ATOM   1627  HB1 ALA A 111       9.818  77.039  38.350  1.00  0.00     0.000 H 
ATOM   1628  HB2 ALA A 111      10.116  75.525  39.358  1.00  0.00     0.000 H 
ATOM   1629  HB3 ALA A 111       8.977  76.635  39.939  1.00  0.00     0.000 H 
ATOM   1630  N   LYS A 112       7.025  73.412  38.374  1.00 43.06    -0.520 N 
ATOM   1631  HN  LYS A 112       6.859  73.488  37.370  1.00  0.00     0.248 HD
ATOM   1632  CA  LYS A 112       6.628  72.220  39.093  1.00 38.58     0.227 C 
ATOM   1633  HA  LYS A 112       6.308  72.504  40.123  1.00  0.00     0.000 H 
ATOM   1634  C   LYS A 112       7.869  71.301  39.182  1.00 36.20     0.526 C 
ATOM   1635  O   LYS A 112       8.749  71.304  38.302  1.00 34.87    -0.500 OA
ATOM   1636  CB  LYS A 112       5.450  71.552  38.365  1.00 37.95     0.039 C 
ATOM   1637  HB1 LYS A 112       4.542  72.185  38.500  1.00  0.00     0.000 H 
ATOM   1638  HB2 LYS A 112       5.161  70.632  38.924  1.00  0.00     0.000 H 
ATOM   1639  CG  LYS A 112       5.586  71.207  36.903  1.00 37.98     0.053 C 
ATOM   1640  HG1 LYS A 112       6.549  70.698  36.666  1.00  0.00     0.000 H 
ATOM   1641  HG2 LYS A 112       5.731  72.105  36.258  1.00  0.00     0.000 H 
ATOM   1642  CD  LYS A 112       4.372  70.386  36.507  1.00 37.87     0.048 C 
ATOM   1643  HD1 LYS A 112       4.121  70.464  35.423  1.00  0.00     0.000 H 
ATOM   1644  HD2 LYS A 112       3.414  70.797  36.901  1.00  0.00     0.000 H 
ATOM   1645  CE  LYS A 112       4.646  68.967  36.958  1.00 38.91     0.218 C 
ATOM   1646  HE1 LYS A 112       5.178  68.942  37.937  1.00  0.00     0.000 H 
ATOM   1647  HE2 LYS A 112       5.426  68.478  36.329  1.00  0.00     0.000 H 
ATOM   1648  NZ  LYS A 112       3.422  68.190  36.993  1.00 41.30    -0.272 N 
ATOM   1649  HZ1 LYS A 112       3.607  67.234  37.297  1.00  0.00     0.311 HD
ATOM   1650  HZ2 LYS A 112       2.935  68.213  36.097  1.00  0.00     0.311 HD
ATOM   1651  HZ3 LYS A 112       2.708  68.637  37.568  1.00  0.00     0.311 HD
ATOM   1652  N   PRO A 113       8.051  70.539  40.267  1.00 34.16    -0.257 N 
ATOM   1653  CA  PRO A 113       9.349  69.936  40.605  1.00 30.49     0.112 C 
ATOM   1654  HA  PRO A 113      10.158  70.677  40.406  1.00  0.00     0.000 H 
ATOM   1655  C   PRO A 113       9.634  68.662  39.811  1.00 28.35     0.526 C 
ATOM   1656  O   PRO A 113       8.651  67.987  39.451  1.00 31.95    -0.500 OA
ATOM   1657  CB  PRO A 113       9.211  69.744  42.108  1.00 30.36    -0.001 C 
ATOM   1658  HB1 PRO A 113       9.582  70.610  42.705  1.00  0.00     0.000 H 
ATOM   1659  HB2 PRO A 113       9.910  68.984  42.527  1.00  0.00     0.000 H 
ATOM   1660  CG  PRO A 113       7.733  69.419  42.352  1.00 28.41     0.036 C 
ATOM   1661  HG1 PRO A 113       7.376  69.647  43.383  1.00  0.00     0.000 H 
ATOM   1662  HG2 PRO A 113       7.501  68.329  42.384  1.00  0.00     0.000 H 
ATOM   1663  CD  PRO A 113       7.006  70.186  41.250  1.00 31.07     0.084 C 
ATOM   1664  HD1 PRO A 113       6.144  69.632  40.810  1.00  0.00     0.000 H 
ATOM   1665  HD2 PRO A 113       6.423  71.061  41.621  1.00  0.00     0.000 H 
ATOM   1666  N   TRP A 114      10.859  68.285  39.470  1.00 23.60    -0.520 N 
ATOM   1667  HN  TRP A 114      11.638  68.922  39.633  1.00  0.00     0.248 HD
ATOM   1668  CA  TRP A 114      11.119  66.989  38.871  1.00 21.42     0.248 C 
ATOM   1669  HA  TRP A 114      10.199  66.363  38.944  1.00  0.00     0.000 H 
ATOM   1670  C   TRP A 114      12.229  66.352  39.725  1.00 21.49     0.526 C 
ATOM   1671  O   TRP A 114      13.029  67.066  40.345  1.00 21.11    -0.500 OA
ATOM   1672  CB  TRP A 114      11.546  67.110  37.337  1.00 15.32     0.020 C 
ATOM   1673  HB  TRP A 114      10.992  66.519  36.589  1.00  0.00     0.000 H 
ATOM   1674  CG  TRP A 114      12.687  68.007  36.858  1.00 13.31     0.046 A 
ATOM   1675  CD1 TRP A 114      12.405  69.226  36.285  1.00 13.16     0.117 A 
ATOM   1676  HD1 TRP A 114      11.412  69.644  36.049  1.00  0.00     0.000 H 
ATOM   1677  CD2 TRP A 114      14.041  67.787  36.993  1.00 11.07    -0.275 A 
ATOM   1678  NE1 TRP A 114      13.571  69.781  36.082  1.00 13.41    -0.330 N 
ATOM   1679  HE1 TRP A 114      13.714  70.705  35.675  1.00  0.00     0.294 HD
ATOM   1680  CE2 TRP A 114      14.562  68.953  36.490  1.00 11.66     0.000 A 
ATOM   1681  CE3 TRP A 114      14.883  66.803  37.455  1.00 11.15     0.145 A 
ATOM   1682  HE3 TRP A 114      14.461  65.866  37.854  1.00  0.00     0.000 H 
ATOM   1683  CZ2 TRP A 114      15.925  69.134  36.456  1.00 11.02     0.029 A 
ATOM   1684  HZ2 TRP A 114      16.353  70.068  36.054  1.00  0.00     0.000 H 
ATOM   1685  CZ3 TRP A 114      16.235  66.975  37.424  1.00 10.51    -0.082 A 
ATOM   1686  HZ3 TRP A 114      16.907  66.183  37.795  1.00  0.00     0.000 H 
ATOM   1687  CH2 TRP A 114      16.748  68.140  36.928  1.00 10.82     0.034 A 
ATOM   1688  HH2 TRP A 114      17.841  68.285  36.906  1.00  0.00     0.000 H 
ATOM   1689  N   TYR A 115      12.282  65.015  39.781  1.00 22.80    -0.520 N 
ATOM   1690  HN  TYR A 115      11.588  64.479  39.261  1.00  0.00     0.248 HD
ATOM   1691  CA  TYR A 115      13.290  64.287  40.554  1.00 24.49     0.245 C 
ATOM   1692  HA  TYR A 115      14.140  64.966  40.799  1.00  0.00     0.000 H 
ATOM   1693  C   TYR A 115      13.780  63.141  39.700  1.00 22.82     0.526 C 
ATOM   1694  O   TYR A 115      12.907  62.341  39.362  1.00 27.52    -0.500 OA
ATOM   1695  CB  TYR A 115      12.727  63.662  41.855  1.00 23.34     0.022 C 
ATOM   1696  HB1 TYR A 115      11.974  62.878  41.608  1.00  0.00     0.000 H 
ATOM   1697  HB2 TYR A 115      13.508  63.036  42.347  1.00  0.00     0.000 H 
ATOM   1698  CG  TYR A 115      12.141  64.653  42.858  1.00 22.67    -0.001 A 
ATOM   1699  CD1 TYR A 115      10.774  64.866  42.959  1.00 22.76    -0.035 A 
ATOM   1700  HD1 TYR A 115      10.070  64.306  42.320  1.00  0.00     0.000 H 
ATOM   1701  CD2 TYR A 115      13.011  65.358  43.664  1.00 23.18    -0.035 A 
ATOM   1702  HD2 TYR A 115      14.095  65.177  43.573  1.00  0.00     0.000 H 
ATOM   1703  CE1 TYR A 115      10.307  65.795  43.877  1.00 24.97     0.100 A 
ATOM   1704  HE1 TYR A 115       9.224  65.982  43.973  1.00  0.00     0.000 H 
ATOM   1705  CE2 TYR A 115      12.559  66.282  44.579  1.00 24.01     0.100 A 
ATOM   1706  HE2 TYR A 115      13.266  66.840  45.217  1.00  0.00     0.000 H 
ATOM   1707  CZ  TYR A 115      11.208  66.491  44.677  1.00 24.51    -0.121 A 
ATOM   1708  OH  TYR A 115      10.775  67.422  45.589  1.00 24.94    -0.368 OA
ATOM   1709  HH  TYR A 115       9.839  67.567  45.657  1.00  0.00     0.339 HD
ATOM   1710  N   GLU A 116      15.044  63.034  39.282  1.00 20.42    -0.520 N 
ATOM   1711  HN  GLU A 116      15.694  63.798  39.468  1.00  0.00     0.248 HD
ATOM   1712  CA  GLU A 116      15.521  61.857  38.567  1.00 21.75     0.246 C 
ATOM   1713  HA  GLU A 116      14.640  61.209  38.349  1.00  0.00     0.000 H 
ATOM   1714  C   GLU A 116      16.547  61.012  39.352  1.00 19.28     0.526 C 
ATOM   1715  O   GLU A 116      17.627  61.518  39.703  1.00 20.69    -0.500 OA
ATOM   1716  CB  GLU A 116      16.151  62.263  37.223  1.00 23.00     0.000 C 
ATOM   1717  HB1 GLU A 116      16.874  61.479  36.897  1.00  0.00     0.000 H 
ATOM   1718  HB2 GLU A 116      16.841  63.125  37.378  1.00  0.00     0.000 H 
ATOM   1719  CG  GLU A 116      15.181  62.580  36.075  1.00 26.77    -0.208 C 
ATOM   1720  HG1 GLU A 116      14.478  63.387  36.389  1.00  0.00     0.000 H 
ATOM   1721  HG2 GLU A 116      15.729  63.096  35.252  1.00  0.00     0.000 H 
ATOM   1722  CD  GLU A 116      14.386  61.394  35.504  1.00 28.08     0.620 C 
ATOM   1723  OE1 GLU A 116      14.451  61.181  34.296  1.00 30.21    -0.706 OA
ATOM   1724  OE2 GLU A 116      13.692  60.673  36.239  1.00 31.21    -0.706 OA
ATOM   1725  N   PRO A 117      16.309  59.740  39.690  1.00 14.13    -0.257 N 
ATOM   1726  CA  PRO A 117      17.297  58.907  40.331  1.00 15.24     0.112 C 
ATOM   1727  HA  PRO A 117      17.936  59.569  40.961  1.00  0.00     0.000 H 
ATOM   1728  C   PRO A 117      18.228  58.102  39.414  1.00 17.23     0.526 C 
ATOM   1729  O   PRO A 117      17.790  57.271  38.617  1.00 21.00    -0.500 OA
ATOM   1730  CB  PRO A 117      16.439  58.085  41.261  1.00 10.34    -0.001 C 
ATOM   1731  HB1 PRO A 117      16.940  57.186  41.689  1.00  0.00     0.000 H 
ATOM   1732  HB2 PRO A 117      16.219  58.565  42.243  1.00  0.00     0.000 H 
ATOM   1733  CG  PRO A 117      15.247  57.797  40.426  1.00  7.83     0.036 C 
ATOM   1734  HG1 PRO A 117      14.375  57.374  40.976  1.00  0.00     0.000 H 
ATOM   1735  HG2 PRO A 117      15.356  56.936  39.726  1.00  0.00     0.000 H 
ATOM   1736  CD  PRO A 117      15.003  59.123  39.770  1.00 12.93     0.084 C 
ATOM   1737  HD1 PRO A 117      14.237  59.749  40.284  1.00  0.00     0.000 H 
ATOM   1738  HD2 PRO A 117      14.473  59.054  38.791  1.00  0.00     0.000 H 
ATOM   1739  N   ILE A 118      19.528  58.275  39.450  1.00 16.25    -0.520 N 
ATOM   1740  HN  ILE A 118      19.943  59.026  40.001  1.00  0.00     0.248 HD
ATOM   1741  CA  ILE A 118      20.354  57.368  38.685  1.00 15.30     0.199 C 
ATOM   1742  HA  ILE A 118      19.709  56.775  37.995  1.00  0.00     0.000 H 
ATOM   1743  C   ILE A 118      21.029  56.427  39.681  1.00 15.70     0.526 C 
ATOM   1744  O   ILE A 118      21.568  56.900  40.695  1.00 15.77    -0.500 OA
ATOM   1745  CB  ILE A 118      21.407  58.143  37.861  1.00 13.86     0.030 C 
ATOM   1746  HB  ILE A 118      22.051  58.736  38.552  1.00  0.00     0.000 H 
ATOM   1747  CG1 ILE A 118      20.768  59.067  36.862  1.00 11.79     0.017 C 
ATOM   1748 1HG1 ILE A 118      20.161  59.859  37.360  1.00  0.00     0.000 H 
ATOM   1749 2HG1 ILE A 118      19.951  58.562  36.295  1.00  0.00     0.000 H 
ATOM   1750  CG2 ILE A 118      22.258  57.131  37.134  1.00 13.43     0.001 C 
ATOM   1751 1HG2 ILE A 118      23.018  57.690  36.540  1.00  0.00     0.000 H 
ATOM   1752 2HG2 ILE A 118      21.657  56.425  36.514  1.00  0.00     0.000 H 
ATOM   1753 3HG2 ILE A 118      22.713  56.377  37.818  1.00  0.00     0.000 H 
ATOM   1754  CD1 ILE A 118      21.820  59.662  35.931  1.00 12.60    -0.001 C 
ATOM   1755 1HD1 ILE A 118      21.346  60.347  35.190  1.00  0.00     0.000 H 
ATOM   1756 2HD1 ILE A 118      22.427  58.870  35.433  1.00  0.00     0.000 H 
ATOM   1757 3HD1 ILE A 118      22.637  60.167  36.498  1.00  0.00     0.000 H 
ATOM   1758  N   TYR A 119      21.009  55.121  39.418  1.00 13.79    -0.520 N 
ATOM   1759  HN  TYR A 119      20.469  54.781  38.622  1.00  0.00     0.248 HD
ATOM   1760  CA  TYR A 119      21.733  54.177  40.233  1.00 17.73     0.245 C 
ATOM   1761  HA  TYR A 119      22.320  54.728  41.004  1.00  0.00     0.000 H 
ATOM   1762  C   TYR A 119      22.700  53.395  39.316  1.00 20.17     0.526 C 
ATOM   1763  O   TYR A 119      22.388  53.188  38.143  1.00 24.02    -0.500 OA
ATOM   1764  CB  TYR A 119      20.717  53.287  40.917  1.00 18.24     0.022 C 
ATOM   1765  HB1 TYR A 119      19.967  52.884  40.197  1.00  0.00     0.000 H 
ATOM   1766  HB2 TYR A 119      20.025  53.871  41.568  1.00  0.00     0.000 H 
ATOM   1767  CG  TYR A 119      21.415  52.175  41.688  1.00 23.93    -0.001 A 
ATOM   1768  CD1 TYR A 119      22.150  52.501  42.804  1.00 26.68    -0.035 A 
ATOM   1769  HD1 TYR A 119      22.225  53.559  43.107  1.00  0.00     0.000 H 
ATOM   1770  CD2 TYR A 119      21.324  50.847  41.309  1.00 25.28    -0.035 A 
ATOM   1771  HD2 TYR A 119      20.738  50.561  40.419  1.00  0.00     0.000 H 
ATOM   1772  CE1 TYR A 119      22.797  51.540  43.556  1.00 28.05     0.100 A 
ATOM   1773  HE1 TYR A 119      23.384  51.827  44.445  1.00  0.00     0.000 H 
ATOM   1774  CE2 TYR A 119      21.974  49.882  42.056  1.00 27.67     0.100 A 
ATOM   1775  HE2 TYR A 119      21.915  48.824  41.751  1.00  0.00     0.000 H 
ATOM   1776  CZ  TYR A 119      22.699  50.232  43.184  1.00 26.81    -0.121 A 
ATOM   1777  OH  TYR A 119      23.300  49.280  43.980  1.00 26.19    -0.368 OA
ATOM   1778  HH  TYR A 119      23.797  49.520  44.753  1.00  0.00     0.339 HD
ATOM   1779  N   LEU A 120      23.869  52.913  39.751  1.00 20.10    -0.520 N 
ATOM   1780  HN  LEU A 120      24.073  53.016  40.745  1.00  0.00     0.248 HD
ATOM   1781  CA  LEU A 120      24.890  52.246  38.922  1.00 20.06     0.204 C 
ATOM   1782  HA  LEU A 120      24.418  51.828  38.002  1.00  0.00     0.000 H 
ATOM   1783  C   LEU A 120      25.547  51.126  39.722  1.00 18.29     0.526 C 
ATOM   1784  O   LEU A 120      25.580  51.271  40.952  1.00 18.05    -0.500 OA
ATOM   1785  CB  LEU A 120      26.007  53.227  38.536  1.00 20.66     0.016 C 
ATOM   1786  HB1 LEU A 120      26.984  52.786  38.842  1.00  0.00     0.000 H 
ATOM   1787  HB2 LEU A 120      25.943  54.115  39.207  1.00  0.00     0.000 H 
ATOM   1788  CG  LEU A 120      26.129  53.719  37.094  1.00 25.32     0.054 C 
ATOM   1789  HG  LEU A 120      26.507  52.885  36.458  1.00  0.00     0.000 H 
ATOM   1790  CD1 LEU A 120      24.809  54.216  36.524  1.00 24.79    -0.014 C 
ATOM   1791 1HD1 LEU A 120      24.898  54.575  35.472  1.00  0.00     0.000 H 
ATOM   1792 2HD1 LEU A 120      24.364  55.002  37.177  1.00  0.00     0.000 H 
ATOM   1793 3HD1 LEU A 120      24.017  53.436  36.613  1.00  0.00     0.000 H 
ATOM   1794  CD2 LEU A 120      27.149  54.836  37.097  1.00 22.56    -0.014 C 
ATOM   1795 1HD2 LEU A 120      27.238  55.195  36.045  1.00  0.00     0.000 H 
ATOM   1796 2HD2 LEU A 120      28.126  54.537  37.543  1.00  0.00     0.000 H 
ATOM   1797 3HD2 LEU A 120      26.907  55.650  37.820  1.00  0.00     0.000 H 
ATOM   1798  N   GLY A 121      26.115  50.048  39.171  1.00 16.75    -0.520 N 
ATOM   1799  HN  GLY A 121      26.079  49.904  38.162  1.00  0.00     0.248 HD
ATOM   1800  CA  GLY A 121      26.787  49.081  40.031  1.00 16.28     0.246 C 
ATOM   1801  HA1 GLY A 121      26.177  48.890  40.945  1.00  0.00     0.000 H 
ATOM   1802  HA2 GLY A 121      27.692  49.541  40.493  1.00  0.00     0.000 H 
ATOM   1803  C   GLY A 121      27.153  47.761  39.357  1.00 16.54     0.526 C 
ATOM   1804  O   GLY A 121      26.300  47.204  38.641  1.00 11.95    -0.500 OA
ATOM   1805  N   GLY A 122      28.379  47.237  39.555  1.00 14.48    -0.520 N 
ATOM   1806  HN  GLY A 122      29.041  47.709  40.171  1.00  0.00     0.248 HD
ATOM   1807  CA  GLY A 122      28.760  45.996  38.889  1.00 14.42     0.246 C 
ATOM   1808  HA1 GLY A 122      27.919  45.265  38.930  1.00  0.00     0.000 H 
ATOM   1809  HA2 GLY A 122      28.827  46.156  37.788  1.00  0.00     0.000 H 
ATOM   1810  C   GLY A 122      30.037  45.353  39.402  1.00 14.67     0.526 C 
ATOM   1811  O   GLY A 122      30.776  46.018  40.132  1.00 18.80    -0.500 OA
ATOM   1812  N   VAL A 123      30.330  44.096  39.075  1.00  9.04    -0.520 N 
ATOM   1813  HN  VAL A 123      29.720  43.572  38.448  1.00  0.00     0.248 HD
ATOM   1814  CA  VAL A 123      31.518  43.483  39.615  1.00  8.88     0.201 C 
ATOM   1815  HA  VAL A 123      31.776  44.009  40.564  1.00  0.00     0.000 H 
ATOM   1816  C   VAL A 123      32.697  43.626  38.663  1.00  8.70     0.526 C 
ATOM   1817  O   VAL A 123      32.649  43.320  37.468  1.00 13.23    -0.500 OA
ATOM   1818  CB  VAL A 123      31.287  41.954  39.952  1.00  8.62     0.033 C 
ATOM   1819  HB  VAL A 123      31.248  41.363  39.007  1.00  0.00     0.000 H 
ATOM   1820  CG1 VAL A 123      32.446  41.463  40.819  1.00  7.25     0.006 C 
ATOM   1821 1HG1 VAL A 123      32.283  40.386  41.056  1.00  0.00     0.000 H 
ATOM   1822 2HG1 VAL A 123      32.588  42.085  41.734  1.00  0.00     0.000 H 
ATOM   1823 3HG1 VAL A 123      33.440  41.651  40.349  1.00  0.00     0.000 H 
ATOM   1824  CG2 VAL A 123      30.010  41.736  40.745  1.00  7.09     0.006 C 
ATOM   1825 1HG2 VAL A 123      29.847  40.659  40.982  1.00  0.00     0.000 H 
ATOM   1826 2HG2 VAL A 123      29.128  42.174  40.222  1.00  0.00     0.000 H 
ATOM   1827 3HG2 VAL A 123      29.994  42.362  41.668  1.00  0.00     0.000 H 
ATOM   1828  N   PHE A 124      33.776  44.115  39.226  1.00  7.91    -0.520 N 
ATOM   1829  HN  PHE A 124      33.731  44.358  40.216  1.00  0.00     0.248 HD
ATOM   1830  CA  PHE A 124      35.026  44.331  38.530  1.00  9.72     0.214 C 
ATOM   1831  HA  PHE A 124      34.972  43.834  37.533  1.00  0.00     0.000 H 
ATOM   1832  C   PHE A 124      36.197  43.730  39.317  1.00 12.08     0.526 C 
ATOM   1833  O   PHE A 124      36.131  43.511  40.524  1.00 17.61    -0.500 OA
ATOM   1834  CB  PHE A 124      35.229  45.857  38.317  1.00 11.49     0.038 C 
ATOM   1835  HB1 PHE A 124      36.245  46.061  37.907  1.00  0.00     0.000 H 
ATOM   1836  HB2 PHE A 124      35.311  46.380  39.298  1.00  0.00     0.000 H 
ATOM   1837  CG  PHE A 124      34.166  46.515  37.453  1.00 10.81     0.011 A 
ATOM   1838  CD1 PHE A 124      33.072  47.089  38.058  1.00 10.87    -0.011 A 
ATOM   1839  HD1 PHE A 124      33.014  47.151  39.158  1.00  0.00     0.000 H 
ATOM   1840  CD2 PHE A 124      34.265  46.449  36.076  1.00 12.17    -0.011 A 
ATOM   1841  HD2 PHE A 124      35.151  45.995  35.601  1.00  0.00     0.000 H 
ATOM   1842  CE1 PHE A 124      32.052  47.585  37.283  1.00 10.59     0.004 A 
ATOM   1843  HE1 PHE A 124      31.168  48.039  37.762  1.00  0.00     0.000 H 
ATOM   1844  CE2 PHE A 124      33.241  46.959  35.302  1.00 13.50     0.004 A 
ATOM   1845  HE2 PHE A 124      33.307  46.923  34.202  1.00  0.00     0.000 H 
ATOM   1846  CZ  PHE A 124      32.130  47.517  35.916  1.00 14.67    -0.003 A 
ATOM   1847  HZ  PHE A 124      31.303  47.909  35.300  1.00  0.00     0.000 H 
ATOM   1848  N   GLN A 125      37.322  43.417  38.694  1.00 17.02    -0.520 N 
ATOM   1849  HN  GLN A 125      37.374  43.588  37.690  1.00  0.00     0.248 HD
ATOM   1850  CA  GLN A 125      38.492  42.844  39.348  1.00 15.27     0.210 C 
ATOM   1851  HA  GLN A 125      38.218  42.418  40.341  1.00  0.00     0.000 H 
ATOM   1852  C   GLN A 125      39.455  44.000  39.510  1.00 14.64     0.526 C 
ATOM   1853  O   GLN A 125      40.181  44.286  38.560  1.00 15.96    -0.500 OA
ATOM   1854  CB  GLN A 125      39.073  41.784  38.460  1.00 14.55     0.053 C 
ATOM   1855  HB1 GLN A 125      38.368  40.927  38.356  1.00  0.00     0.000 H 
ATOM   1856  HB2 GLN A 125      39.103  42.130  37.400  1.00  0.00     0.000 H 
ATOM   1857  CG  GLN A 125      40.423  41.309  38.900  1.00 24.75    -0.043 C 
ATOM   1858  HG1 GLN A 125      40.349  40.276  39.313  1.00  0.00     0.000 H 
ATOM   1859  HG2 GLN A 125      40.744  41.863  39.813  1.00  0.00     0.000 H 
ATOM   1860  CD  GLN A 125      41.525  41.371  37.831  1.00 29.04     0.675 C 
ATOM   1861  OE1 GLN A 125      41.457  40.696  36.801  1.00 33.17    -0.470 OA
ATOM   1862  NE2 GLN A 125      42.613  42.129  37.981  1.00 32.30    -0.867 N 
ATOM   1863 1HE2 GLN A 125      43.345  42.170  37.271  1.00  0.00     0.344 HD
ATOM   1864 2HE2 GLN A 125      42.669  42.687  38.833  1.00  0.00     0.344 HD
ATOM   1865  N   LEU A 126      39.504  44.699  40.639  1.00 12.53    -0.520 N 
ATOM   1866  HN  LEU A 126      38.887  44.466  41.417  1.00  0.00     0.248 HD
ATOM   1867  CA  LEU A 126      40.454  45.809  40.754  1.00 13.41     0.204 C 
ATOM   1868  HA  LEU A 126      40.545  46.289  39.752  1.00  0.00     0.000 H 
ATOM   1869  C   LEU A 126      41.854  45.361  41.193  1.00 12.86     0.526 C 
ATOM   1870  O   LEU A 126      42.072  44.159  41.339  1.00 12.02    -0.500 OA
ATOM   1871  CB  LEU A 126      39.867  46.851  41.728  1.00 13.01     0.016 C 
ATOM   1872  HB1 LEU A 126      40.610  47.642  41.985  1.00  0.00     0.000 H 
ATOM   1873  HB2 LEU A 126      39.716  46.426  42.748  1.00  0.00     0.000 H 
ATOM   1874  CG  LEU A 126      38.594  47.438  41.172  1.00 12.11     0.054 C 
ATOM   1875  HG  LEU A 126      38.031  46.628  40.652  1.00  0.00     0.000 H 
ATOM   1876  CD1 LEU A 126      37.694  48.056  42.194  1.00 10.20    -0.014 C 
ATOM   1877 1HD1 LEU A 126      37.362  47.313  42.956  1.00  0.00     0.000 H 
ATOM   1878 2HD1 LEU A 126      36.824  48.563  41.715  1.00  0.00     0.000 H 
ATOM   1879 3HD1 LEU A 126      38.172  48.943  42.672  1.00  0.00     0.000 H 
ATOM   1880  CD2 LEU A 126      39.040  48.435  40.149  1.00 12.93    -0.014 C 
ATOM   1881 1HD2 LEU A 126      39.711  47.974  39.387  1.00  0.00     0.000 H 
ATOM   1882 2HD2 LEU A 126      39.518  49.322  40.627  1.00  0.00     0.000 H 
ATOM   1883 3HD2 LEU A 126      38.170  48.942  39.670  1.00  0.00     0.000 H 
ATOM   1884  N   GLU A 127      42.850  46.248  41.317  1.00 12.50    -0.520 N 
ATOM   1885  HN  GLU A 127      42.677  47.216  41.046  1.00  0.00     0.248 HD
ATOM   1886  CA  GLU A 127      44.176  45.889  41.824  1.00 15.87     0.246 C 
ATOM   1887  HA  GLU A 127      44.154  44.843  42.210  1.00  0.00     0.000 H 
ATOM   1888  C   GLU A 127      44.571  46.826  42.937  1.00 15.74     0.526 C 
ATOM   1889  O   GLU A 127      43.913  47.839  43.145  1.00 20.11    -0.500 OA
ATOM   1890  CB  GLU A 127      45.304  46.037  40.859  1.00 16.83     0.000 C 
ATOM   1891  HB1 GLU A 127      46.225  45.574  41.284  1.00  0.00     0.000 H 
ATOM   1892  HB2 GLU A 127      45.618  47.106  40.809  1.00  0.00     0.000 H 
ATOM   1893  CG  GLU A 127      45.068  45.513  39.469  1.00 23.89    -0.208 C 
ATOM   1894  HG1 GLU A 127      44.343  44.665  39.466  1.00  0.00     0.000 H 
ATOM   1895  HG2 GLU A 127      44.486  46.235  38.850  1.00  0.00     0.000 H 
ATOM   1896  CD  GLU A 127      46.379  45.133  38.804  1.00 25.87     0.620 C 
ATOM   1897  OE1 GLU A 127      46.484  43.979  38.342  1.00 24.89    -0.706 OA
ATOM   1898  OE2 GLU A 127      47.275  45.993  38.803  1.00 26.86    -0.706 OA
ATOM   1899  N   LYS A 128      45.651  46.587  43.661  1.00 19.60    -0.520 N 
ATOM   1900  HN  LYS A 128      46.177  45.721  43.542  1.00  0.00     0.248 HD
ATOM   1901  CA  LYS A 128      46.075  47.588  44.633  1.00 23.52     0.227 C 
ATOM   1902  HA  LYS A 128      45.187  47.847  45.256  1.00  0.00     0.000 H 
ATOM   1903  C   LYS A 128      46.608  48.901  44.016  1.00 19.52     0.526 C 
ATOM   1904  O   LYS A 128      47.372  48.921  43.053  1.00 20.74    -0.500 OA
ATOM   1905  CB  LYS A 128      47.151  46.987  45.580  1.00 25.61     0.039 C 
ATOM   1906  HB1 LYS A 128      47.904  46.438  44.967  1.00  0.00     0.000 H 
ATOM   1907  HB2 LYS A 128      46.694  46.152  46.160  1.00  0.00     0.000 H 
ATOM   1908  CG  LYS A 128      47.897  47.933  46.564  1.00 27.67     0.053 C 
ATOM   1909  HG1 LYS A 128      48.457  48.776  46.097  1.00  0.00     0.000 H 
ATOM   1910  HG2 LYS A 128      47.250  48.591  47.190  1.00  0.00     0.000 H 
ATOM   1911  CD  LYS A 128      48.722  46.937  47.307  1.00 29.65     0.048 C 
ATOM   1912  HD1 LYS A 128      48.105  46.406  48.069  1.00  0.00     0.000 H 
ATOM   1913  HD2 LYS A 128      48.987  46.077  46.649  1.00  0.00     0.000 H 
ATOM   1914  CE  LYS A 128      49.949  47.520  47.934  1.00 32.85     0.218 C 
ATOM   1915  HE1 LYS A 128      50.554  48.142  47.234  1.00  0.00     0.000 H 
ATOM   1916  HE2 LYS A 128      49.731  48.325  48.675  1.00  0.00     0.000 H 
ATOM   1917  NZ  LYS A 128      50.682  46.398  48.495  1.00 37.61    -0.272 N 
ATOM   1918  HZ1 LYS A 128      51.518  46.795  48.922  1.00  0.00     0.311 HD
ATOM   1919  HZ2 LYS A 128      50.881  45.662  47.817  1.00  0.00     0.311 HD
ATOM   1920  HZ3 LYS A 128      50.128  45.829  49.136  1.00  0.00     0.311 HD
ATOM   1921  N   GLY A 129      46.166  50.007  44.594  1.00 15.77    -0.520 N 
ATOM   1922  HN  GLY A 129      45.442  49.934  45.309  1.00  0.00     0.248 HD
ATOM   1923  CA  GLY A 129      46.663  51.287  44.254  1.00 14.86     0.246 C 
ATOM   1924  HA1 GLY A 129      47.725  51.238  43.919  1.00  0.00     0.000 H 
ATOM   1925  HA2 GLY A 129      46.797  51.927  45.157  1.00  0.00     0.000 H 
ATOM   1926  C   GLY A 129      45.793  51.954  43.230  1.00 18.48     0.526 C 
ATOM   1927  O   GLY A 129      45.953  53.170  43.167  1.00 23.77    -0.500 OA
ATOM   1928  N   ASP A 130      44.864  51.362  42.447  1.00 17.80    -0.520 N 
ATOM   1929  HN  ASP A 130      44.659  50.368  42.546  1.00  0.00     0.248 HD
ATOM   1930  CA  ASP A 130      44.151  52.182  41.445  1.00 19.28     0.246 C 
ATOM   1931  HA  ASP A 130      44.880  52.927  41.048  1.00  0.00     0.000 H 
ATOM   1932  C   ASP A 130      42.972  52.952  41.977  1.00 15.81     0.526 C 
ATOM   1933  O   ASP A 130      42.228  52.374  42.762  1.00 16.36    -0.500 OA
ATOM   1934  CB  ASP A 130      43.640  51.348  40.235  1.00 21.90    -0.208 C 
ATOM   1935  HB1 ASP A 130      43.128  52.035  39.522  1.00  0.00     0.000 H 
ATOM   1936  HB2 ASP A 130      44.520  51.021  39.634  1.00  0.00     0.000 H 
ATOM   1937  CG  ASP A 130      42.742  50.142  40.474  1.00 24.53     0.620 C 
ATOM   1938  OD1 ASP A 130      41.668  50.293  41.070  1.00 26.68    -0.706 OA
ATOM   1939  OD2 ASP A 130      43.117  49.053  40.036  1.00 22.48    -0.706 OA
ATOM   1940  N   ARG A 131      42.808  54.231  41.611  1.00 15.36    -0.520 N 
ATOM   1941  HN  ARG A 131      43.467  54.669  40.967  1.00  0.00     0.248 HD
ATOM   1942  CA  ARG A 131      41.683  54.991  42.139  1.00 17.51     0.237 C 
ATOM   1943  HA  ARG A 131      41.600  54.781  43.231  1.00  0.00     0.000 H 
ATOM   1944  C   ARG A 131      40.345  54.652  41.481  1.00 17.01     0.526 C 
ATOM   1945  O   ARG A 131      40.310  54.116  40.365  1.00 18.43    -0.500 OA
ATOM   1946  CB  ARG A 131      41.823  56.477  41.953  1.00 19.98     0.049 C 
ATOM   1947  HB1 ARG A 131      41.261  56.737  41.026  1.00  0.00     0.000 H 
ATOM   1948  HB2 ARG A 131      41.216  56.957  42.756  1.00  0.00     0.000 H 
ATOM   1949  CG  ARG A 131      43.148  57.240  41.890  1.00 26.05     0.058 C 
ATOM   1950  HG1 ARG A 131      43.012  58.158  41.271  1.00  0.00     0.000 H 
ATOM   1951  HG2 ARG A 131      43.870  56.667  41.263  1.00  0.00     0.000 H 
ATOM   1952  CD  ARG A 131      43.819  57.619  43.205  1.00 30.35     0.111 C 
ATOM   1953  HD1 ARG A 131      44.131  58.689  43.205  1.00  0.00     0.000 H 
ATOM   1954  HD2 ARG A 131      43.081  57.650  44.040  1.00  0.00     0.000 H 
ATOM   1955  NE  ARG A 131      44.944  56.739  43.524  1.00 34.05    -0.493 N 
ATOM   1956  HE  ARG A 131      44.881  55.744  43.310  1.00  0.00     0.294 HD
ATOM   1957  CZ  ARG A 131      46.059  57.226  44.095  1.00 35.61     0.814 C 
ATOM   1958  NH1 ARG A 131      47.070  56.393  44.360  1.00 35.40    -0.634 N 
ATOM   1959 1HH1 ARG A 131      47.916  56.763  44.793  1.00  0.00     0.361 HD
ATOM   1960 2HH1 ARG A 131      46.983  55.404  44.125  1.00  0.00     0.361 HD
ATOM   1961  NH2 ARG A 131      46.174  58.528  44.404  1.00 35.57    -0.634 N 
ATOM   1962 1HH2 ARG A 131      47.020  58.898  44.837  1.00  0.00     0.361 HD
ATOM   1963 2HH2 ARG A 131      45.402  59.164  44.202  1.00  0.00     0.361 HD
ATOM   1964  N   LEU A 132      39.214  54.891  42.163  1.00 18.05    -0.520 N 
ATOM   1965  HN  LEU A 132      39.289  55.128  43.152  1.00  0.00     0.248 HD
ATOM   1966  CA  LEU A 132      37.848  54.829  41.551  1.00 14.56     0.204 C 
ATOM   1967  HA  LEU A 132      37.938  54.559  40.473  1.00  0.00     0.000 H 
ATOM   1968  C   LEU A 132      37.199  56.204  41.675  1.00 12.22     0.526 C 
ATOM   1969  O   LEU A 132      37.242  56.731  42.796  1.00 17.69    -0.500 OA
ATOM   1970  CB  LEU A 132      36.924  53.839  42.244  1.00  9.12     0.016 C 
ATOM   1971  HB1 LEU A 132      37.027  53.973  43.346  1.00  0.00     0.000 H 
ATOM   1972  HB2 LEU A 132      35.871  54.165  42.077  1.00  0.00     0.000 H 
ATOM   1973  CG  LEU A 132      37.021  52.382  41.936  1.00  9.05     0.054 C 
ATOM   1974  HG  LEU A 132      36.391  51.813  42.659  1.00  0.00     0.000 H 
ATOM   1975  CD1 LEU A 132      36.510  52.140  40.541  1.00  7.53    -0.014 C 
ATOM   1976 1HD1 LEU A 132      35.455  52.493  40.462  1.00  0.00     0.000 H 
ATOM   1977 2HD1 LEU A 132      36.621  51.075  40.232  1.00  0.00     0.000 H 
ATOM   1978 3HD1 LEU A 132      37.167  52.601  39.767  1.00  0.00     0.000 H 
ATOM   1979  CD2 LEU A 132      38.442  51.907  42.043  1.00  8.67    -0.014 C 
ATOM   1980 1HD2 LEU A 132      38.821  52.086  43.076  1.00  0.00     0.000 H 
ATOM   1981 2HD2 LEU A 132      39.099  52.368  41.269  1.00  0.00     0.000 H 
ATOM   1982 3HD2 LEU A 132      38.553  50.842  41.734  1.00  0.00     0.000 H 
ATOM   1983  N   SER A 133      36.655  56.870  40.657  1.00 11.50    -0.520 N 
ATOM   1984  HN  SER A 133      36.670  56.461  39.723  1.00  0.00     0.248 HD
ATOM   1985  CA  SER A 133      36.025  58.206  40.867  1.00 14.26     0.292 C 
ATOM   1986  HA  SER A 133      36.259  58.551  41.901  1.00  0.00     0.000 H 
ATOM   1987  C   SER A 133      34.503  58.162  40.699  1.00 14.50     0.526 C 
ATOM   1988  O   SER A 133      34.067  57.285  39.955  1.00 22.58    -0.500 OA
ATOM   1989  CB  SER A 133      36.541  59.254  39.872  1.00  8.86     0.194 C 
ATOM   1990  HB1 SER A 133      36.035  60.244  39.959  1.00  0.00     0.000 H 
ATOM   1991  HB2 SER A 133      36.250  59.052  38.815  1.00  0.00     0.000 H 
ATOM   1992  OG  SER A 133      37.933  59.308  40.078  1.00 15.39    -0.550 OA
ATOM   1993  HG  SER A 133      38.252  59.957  39.462  1.00  0.00     0.310 HD
ATOM   1994  N   ALA A 134      33.594  58.928  41.298  1.00 13.08    -0.520 N 
ATOM   1995  HN  ALA A 134      33.861  59.566  42.048  1.00  0.00     0.248 HD
ATOM   1996  CA  ALA A 134      32.216  58.834  40.858  1.00 11.26     0.215 C 
ATOM   1997  HA  ALA A 134      32.189  58.202  39.940  1.00  0.00     0.000 H 
ATOM   1998  C   ALA A 134      31.547  60.173  40.533  1.00 14.59     0.526 C 
ATOM   1999  O   ALA A 134      30.726  60.642  41.325  1.00 15.61    -0.500 OA
ATOM   2000  CB  ALA A 134      31.478  58.108  41.944  1.00 15.70     0.031 C 
ATOM   2001  HB1 ALA A 134      31.965  57.133  42.181  1.00  0.00     0.000 H 
ATOM   2002  HB2 ALA A 134      30.400  57.977  41.690  1.00  0.00     0.000 H 
ATOM   2003  HB3 ALA A 134      31.363  58.741  42.855  1.00  0.00     0.000 H 
ATOM   2004  N   GLU A 135      31.818  60.881  39.428  1.00 17.69    -0.520 N 
ATOM   2005  HN  GLU A 135      32.456  60.520  38.719  1.00  0.00     0.248 HD
ATOM   2006  CA  GLU A 135      31.164  62.206  39.263  1.00 20.57     0.246 C 
ATOM   2007  HA  GLU A 135      30.945  62.587  40.288  1.00  0.00     0.000 H 
ATOM   2008  C   GLU A 135      29.869  62.270  38.486  1.00 20.00     0.526 C 
ATOM   2009  O   GLU A 135      29.505  61.378  37.712  1.00 21.48    -0.500 OA
ATOM   2010  CB  GLU A 135      31.974  63.287  38.554  1.00 19.66     0.000 C 
ATOM   2011  HB1 GLU A 135      31.549  64.285  38.812  1.00  0.00     0.000 H 
ATOM   2012  HB2 GLU A 135      31.762  63.239  37.460  1.00  0.00     0.000 H 
ATOM   2013  CG  GLU A 135      33.470  63.323  38.762  1.00 20.19    -0.208 C 
ATOM   2014  HG1 GLU A 135      33.728  63.054  39.813  1.00  0.00     0.000 H 
ATOM   2015  HG2 GLU A 135      33.845  64.373  38.740  1.00  0.00     0.000 H 
ATOM   2016  CD  GLU A 135      34.247  62.454  37.779  1.00 20.51     0.620 C 
ATOM   2017  OE1 GLU A 135      35.369  62.853  37.458  1.00 20.42    -0.706 OA
ATOM   2018  OE2 GLU A 135      33.745  61.406  37.348  1.00 21.14    -0.706 OA
ATOM   2019  N   ILE A 136      29.147  63.333  38.832  1.00 22.36    -0.520 N 
ATOM   2020  HN  ILE A 136      29.399  63.855  39.671  1.00  0.00     0.248 HD
ATOM   2021  CA  ILE A 136      27.991  63.774  38.030  1.00 22.29     0.199 C 
ATOM   2022  HA  ILE A 136      27.774  62.997  37.261  1.00  0.00     0.000 H 
ATOM   2023  C   ILE A 136      28.323  65.106  37.309  1.00 21.10     0.526 C 
ATOM   2024  O   ILE A 136      29.083  65.951  37.799  1.00 23.28    -0.500 OA
ATOM   2025  CB  ILE A 136      26.717  64.017  38.857  1.00 19.88     0.030 C 
ATOM   2026  HB  ILE A 136      25.964  64.521  38.207  1.00  0.00     0.000 H 
ATOM   2027  CG1 ILE A 136      27.030  64.914  39.998  1.00 17.75     0.017 C 
ATOM   2028 1HG1 ILE A 136      28.019  65.424  39.926  1.00  0.00     0.000 H 
ATOM   2029 2HG1 ILE A 136      27.240  64.385  40.957  1.00  0.00     0.000 H 
ATOM   2030  CG2 ILE A 136      26.135  62.692  39.335  1.00 22.68     0.001 C 
ATOM   2031 1HG2 ILE A 136      25.212  62.868  39.934  1.00  0.00     0.000 H 
ATOM   2032 2HG2 ILE A 136      26.885  62.087  39.895  1.00  0.00     0.000 H 
ATOM   2033 3HG2 ILE A 136      25.954  61.988  38.489  1.00  0.00     0.000 H 
ATOM   2034  CD1 ILE A 136      25.880  65.824  40.046  1.00 17.31    -0.001 C 
ATOM   2035 1HD1 ILE A 136      26.115  66.498  40.903  1.00  0.00     0.000 H 
ATOM   2036 2HD1 ILE A 136      24.891  65.314  40.118  1.00  0.00     0.000 H 
ATOM   2037 3HD1 ILE A 136      25.670  66.353  39.087  1.00  0.00     0.000 H 
ATOM   2038  N   ASN A 137      27.770  65.331  36.124  1.00 19.00    -0.520 N 
ATOM   2039  HN  ASN A 137      27.139  64.626  35.742  1.00  0.00     0.248 HD
ATOM   2040  CA  ASN A 137      28.017  66.526  35.347  1.00 16.85     0.217 C 
ATOM   2041  HA  ASN A 137      29.095  66.796  35.439  1.00  0.00     0.000 H 
ATOM   2042  C   ASN A 137      27.195  67.680  35.798  1.00 17.73     0.526 C 
ATOM   2043  O   ASN A 137      27.513  68.818  35.432  1.00 23.77    -0.500 OA
ATOM   2044  CB  ASN A 137      27.693  66.330  33.902  1.00 18.18     0.003 C 
ATOM   2045  HB1 ASN A 137      28.041  67.194  33.290  1.00  0.00     0.000 H 
ATOM   2046  HB2 ASN A 137      28.324  65.528  33.452  1.00  0.00     0.000 H 
ATOM   2047  CG  ASN A 137      26.226  66.059  33.678  1.00 21.36     0.675 C 
ATOM   2048  OD1 ASN A 137      25.482  65.578  34.546  1.00 23.04    -0.470 OA
ATOM   2049  ND2 ASN A 137      25.806  66.383  32.481  1.00 23.85    -0.867 N 
ATOM   2050 1HD2 ASN A 137      26.418  66.779  31.767  1.00  0.00     0.344 HD
ATOM   2051 2HD2 ASN A 137      24.814  66.200  32.330  1.00  0.00     0.344 HD
ATOM   2052  N   ARG A 138      26.091  67.468  36.500  1.00 16.82    -0.520 N 
ATOM   2053  HN  ARG A 138      25.725  66.532  36.675  1.00  0.00     0.248 HD
ATOM   2054  CA  ARG A 138      25.449  68.648  36.995  1.00 20.19     0.237 C 
ATOM   2055  HA  ARG A 138      26.110  69.507  36.733  1.00  0.00     0.000 H 
ATOM   2056  C   ARG A 138      25.211  68.719  38.497  1.00 20.23     0.526 C 
ATOM   2057  O   ARG A 138      24.031  68.685  38.866  1.00 21.54    -0.500 OA
ATOM   2058  CB  ARG A 138      24.171  68.807  36.170  1.00 24.11     0.049 C 
ATOM   2059  HB1 ARG A 138      23.847  67.845  35.709  1.00  0.00     0.000 H 
ATOM   2060  HB2 ARG A 138      23.277  68.987  36.812  1.00  0.00     0.000 H 
ATOM   2061  CG  ARG A 138      24.365  69.927  35.111  1.00 26.83     0.058 C 
ATOM   2062  HG1 ARG A 138      25.370  69.909  34.629  1.00  0.00     0.000 H 
ATOM   2063  HG2 ARG A 138      24.442  70.946  35.556  1.00  0.00     0.000 H 
ATOM   2064  CD  ARG A 138      23.236  69.790  34.134  1.00 29.88     0.111 C 
ATOM   2065  HD1 ARG A 138      23.401  68.918  33.459  1.00  0.00     0.000 H 
ATOM   2066  HD2 ARG A 138      22.307  69.452  34.649  1.00  0.00     0.000 H 
ATOM   2067  NE  ARG A 138      22.990  70.985  33.371  1.00 32.53    -0.493 N 
ATOM   2068  HE  ARG A 138      23.372  71.015  32.426  1.00  0.00     0.294 HD
ATOM   2069  CZ  ARG A 138      22.300  72.074  33.786  1.00 34.73     0.814 C 
ATOM   2070  NH1 ARG A 138      22.148  73.035  32.886  1.00 39.13    -0.634 N 
ATOM   2071 1HH1 ARG A 138      22.500  72.826  31.952  1.00  0.00     0.361 HD
ATOM   2072 2HH1 ARG A 138      21.628  73.855  33.199  1.00  0.00     0.361 HD
ATOM   2073  NH2 ARG A 138      21.839  72.348  35.009  1.00 29.42    -0.634 N 
ATOM   2074 1HH2 ARG A 138      21.956  71.608  35.702  1.00  0.00     0.361 HD
ATOM   2075 2HH2 ARG A 138      21.319  73.168  35.322  1.00  0.00     0.361 HD
ATOM   2076  N   PRO A 139      26.208  68.867  39.421  1.00 16.38    -0.257 N 
ATOM   2077  CA  PRO A 139      26.003  69.105  40.838  1.00 16.52     0.112 C 
ATOM   2078  HA  PRO A 139      25.742  68.129  41.310  1.00  0.00     0.000 H 
ATOM   2079  C   PRO A 139      24.907  70.085  41.180  1.00 18.25     0.526 C 
ATOM   2080  O   PRO A 139      24.257  69.809  42.170  1.00 23.18    -0.500 OA
ATOM   2081  CB  PRO A 139      27.336  69.529  41.381  1.00 13.08    -0.001 C 
ATOM   2082  HB1 PRO A 139      27.863  68.751  41.981  1.00  0.00     0.000 H 
ATOM   2083  HB2 PRO A 139      27.286  70.286  42.198  1.00  0.00     0.000 H 
ATOM   2084  CG  PRO A 139      28.059  69.971  40.177  1.00 13.26     0.036 C 
ATOM   2085  HG1 PRO A 139      29.158  70.118  40.299  1.00  0.00     0.000 H 
ATOM   2086  HG2 PRO A 139      27.862  71.019  39.851  1.00  0.00     0.000 H 
ATOM   2087  CD  PRO A 139      27.641  68.881  39.193  1.00 16.95     0.084 C 
ATOM   2088  HD1 PRO A 139      27.963  69.032  38.136  1.00  0.00     0.000 H 
ATOM   2089  HD2 PRO A 139      28.160  67.901  39.306  1.00  0.00     0.000 H 
ATOM   2090  N   ASP A 140      24.603  71.158  40.452  1.00 15.99    -0.520 N 
ATOM   2091  HN  ASP A 140      25.180  71.391  39.644  1.00  0.00     0.248 HD
ATOM   2092  CA  ASP A 140      23.463  72.009  40.784  1.00 17.91     0.246 C 
ATOM   2093  HA  ASP A 140      23.665  72.464  41.782  1.00  0.00     0.000 H 
ATOM   2094  C   ASP A 140      22.131  71.271  40.879  1.00 18.35     0.526 C 
ATOM   2095  O   ASP A 140      21.226  71.653  41.603  1.00 19.50    -0.500 OA
ATOM   2096  CB  ASP A 140      23.305  73.172  39.764  1.00 18.82    -0.208 C 
ATOM   2097  HB1 ASP A 140      22.227  73.457  39.740  1.00  0.00     0.000 H 
ATOM   2098  HB2 ASP A 140      23.778  74.079  40.208  1.00  0.00     0.000 H 
ATOM   2099  CG  ASP A 140      23.789  73.058  38.313  1.00 19.55     0.620 C 
ATOM   2100  OD1 ASP A 140      24.360  72.047  37.915  1.00 21.36    -0.706 OA
ATOM   2101  OD2 ASP A 140      23.622  74.019  37.565  1.00 19.61    -0.706 OA
ATOM   2102  N   TYR A 141      22.002  70.161  40.185  1.00 19.46    -0.520 N 
ATOM   2103  HN  TYR A 141      22.771  69.862  39.586  1.00  0.00     0.248 HD
ATOM   2104  CA  TYR A 141      20.809  69.354  40.244  1.00 18.71     0.245 C 
ATOM   2105  HA  TYR A 141      19.941  70.031  40.420  1.00  0.00     0.000 H 
ATOM   2106  C   TYR A 141      20.829  68.317  41.348  1.00 20.77     0.526 C 
ATOM   2107  O   TYR A 141      20.008  67.397  41.326  1.00 24.89    -0.500 OA
ATOM   2108  CB  TYR A 141      20.610  68.668  38.904  1.00 19.19     0.022 C 
ATOM   2109  HB1 TYR A 141      21.549  68.173  38.563  1.00  0.00     0.000 H 
ATOM   2110  HB2 TYR A 141      19.960  67.768  39.006  1.00  0.00     0.000 H 
ATOM   2111  CG  TYR A 141      20.075  69.610  37.846  1.00 20.26    -0.001 A 
ATOM   2112  CD1 TYR A 141      20.554  69.567  36.571  1.00 17.69    -0.035 A 
ATOM   2113  HD1 TYR A 141      21.362  68.870  36.293  1.00  0.00     0.000 H 
ATOM   2114  CD2 TYR A 141      19.073  70.509  38.182  1.00 22.33    -0.035 A 
ATOM   2115  HD2 TYR A 141      18.702  70.534  39.221  1.00  0.00     0.000 H 
ATOM   2116  CE1 TYR A 141      20.007  70.409  35.648  1.00 20.74     0.100 A 
ATOM   2117  HE1 TYR A 141      20.359  70.369  34.603  1.00  0.00     0.000 H 
ATOM   2118  CE2 TYR A 141      18.531  71.366  37.261  1.00 20.87     0.100 A 
ATOM   2119  HE2 TYR A 141      17.730  72.073  37.535  1.00  0.00     0.000 H 
ATOM   2120  CZ  TYR A 141      19.023  71.308  35.996  1.00 21.27    -0.121 A 
ATOM   2121  OH  TYR A 141      18.561  72.234  35.094  1.00 25.96    -0.368 OA
ATOM   2122  HH  TYR A 141      17.882  72.854  35.334  1.00  0.00     0.339 HD
ATOM   2123  N   LEU A 142      21.720  68.397  42.334  1.00 18.00    -0.520 N 
ATOM   2124  HN  LEU A 142      22.392  69.164  42.351  1.00  0.00     0.248 HD
ATOM   2125  CA  LEU A 142      21.739  67.398  43.383  1.00 17.94     0.204 C 
ATOM   2126  HA  LEU A 142      21.468  66.414  42.934  1.00  0.00     0.000 H 
ATOM   2127  C   LEU A 142      20.754  67.701  44.492  1.00 20.36     0.526 C 
ATOM   2128  O   LEU A 142      20.543  68.852  44.917  1.00 25.79    -0.500 OA
ATOM   2129  CB  LEU A 142      23.114  67.273  44.005  1.00 14.15     0.016 C 
ATOM   2130  HB1 LEU A 142      23.037  66.811  45.017  1.00  0.00     0.000 H 
ATOM   2131  HB2 LEU A 142      23.504  68.281  44.280  1.00  0.00     0.000 H 
ATOM   2132  CG  LEU A 142      24.125  66.536  43.175  1.00 14.41     0.054 C 
ATOM   2133  HG  LEU A 142      24.201  67.016  42.171  1.00  0.00     0.000 H 
ATOM   2134  CD1 LEU A 142      25.489  66.551  43.846  1.00 15.65    -0.014 C 
ATOM   2135 1HD1 LEU A 142      26.240  66.004  43.230  1.00  0.00     0.000 H 
ATOM   2136 2HD1 LEU A 142      25.441  66.154  44.887  1.00  0.00     0.000 H 
ATOM   2137 3HD1 LEU A 142      25.823  67.589  44.078  1.00  0.00     0.000 H 
ATOM   2138  CD2 LEU A 142      23.651  65.113  43.015  1.00 10.55    -0.014 C 
ATOM   2139 1HD2 LEU A 142      24.402  64.566  42.399  1.00  0.00     0.000 H 
ATOM   2140 2HD2 LEU A 142      22.620  65.047  42.597  1.00  0.00     0.000 H 
ATOM   2141 3HD2 LEU A 142      23.449  64.614  43.991  1.00  0.00     0.000 H 
ATOM   2142  N   LEU A 143      20.135  66.641  44.992  1.00 20.58    -0.520 N 
ATOM   2143  HN  LEU A 143      20.331  65.719  44.603  1.00  0.00     0.248 HD
ATOM   2144  CA  LEU A 143      19.182  66.766  46.084  1.00 19.37     0.204 C 
ATOM   2145  HA  LEU A 143      18.605  67.714  45.971  1.00  0.00     0.000 H 
ATOM   2146  C   LEU A 143      19.914  66.772  47.402  1.00 19.57     0.526 C 
ATOM   2147  O   LEU A 143      20.794  65.948  47.552  1.00 19.79    -0.500 OA
ATOM   2148  CB  LEU A 143      18.246  65.602  46.052  1.00 17.74     0.016 C 
ATOM   2149  HB1 LEU A 143      18.762  64.738  46.532  1.00  0.00     0.000 H 
ATOM   2150  HB2 LEU A 143      18.160  65.264  44.993  1.00  0.00     0.000 H 
ATOM   2151  CG  LEU A 143      16.871  65.679  46.616  1.00 18.29     0.054 C 
ATOM   2152  HG  LEU A 143      16.860  65.314  47.669  1.00  0.00     0.000 H 
ATOM   2153  CD1 LEU A 143      16.301  67.072  46.535  1.00 19.77    -0.014 C 
ATOM   2154 1HD1 LEU A 143      15.271  67.130  46.958  1.00  0.00     0.000 H 
ATOM   2155 2HD1 LEU A 143      16.331  67.460  45.490  1.00  0.00     0.000 H 
ATOM   2156 3HD1 LEU A 143      16.978  67.814  47.019  1.00  0.00     0.000 H 
ATOM   2157  CD2 LEU A 143      15.988  64.802  45.739  1.00 24.78    -0.014 C 
ATOM   2158 1HD2 LEU A 143      14.958  64.860  46.162  1.00  0.00     0.000 H 
ATOM   2159 2HD2 LEU A 143      16.365  63.757  45.640  1.00  0.00     0.000 H 
ATOM   2160 3HD2 LEU A 143      16.036  65.071  44.658  1.00  0.00     0.000 H 
ATOM   2161  N   PHE A 144      19.653  67.629  48.388  1.00 21.14    -0.520 N 
ATOM   2162  HN  PHE A 144      19.000  68.394  48.222  1.00  0.00     0.248 HD
ATOM   2163  CA  PHE A 144      20.282  67.499  49.707  1.00 21.29     0.214 C 
ATOM   2164  HA  PHE A 144      20.644  66.451  49.821  1.00  0.00     0.000 H 
ATOM   2165  C   PHE A 144      19.276  67.780  50.810  1.00 24.30     0.526 C 
ATOM   2166  O   PHE A 144      19.340  68.734  51.593  1.00 23.96    -0.500 OA
ATOM   2167  CB  PHE A 144      21.489  68.452  49.880  1.00 19.81     0.038 C 
ATOM   2168  HB1 PHE A 144      21.730  68.608  50.957  1.00  0.00     0.000 H 
ATOM   2169  HB2 PHE A 144      21.220  69.499  49.606  1.00  0.00     0.000 H 
ATOM   2170  CG  PHE A 144      22.703  67.977  49.109  1.00 15.15     0.011 A 
ATOM   2171  CD1 PHE A 144      23.151  66.691  49.282  1.00 13.61    -0.011 A 
ATOM   2172  HD1 PHE A 144      22.646  66.011  49.989  1.00  0.00     0.000 H 
ATOM   2173  CD2 PHE A 144      23.344  68.828  48.225  1.00 12.92    -0.011 A 
ATOM   2174  HD2 PHE A 144      22.981  69.861  48.088  1.00  0.00     0.000 H 
ATOM   2175  CE1 PHE A 144      24.244  66.264  48.556  1.00 15.19     0.004 A 
ATOM   2176  HE1 PHE A 144      24.606  65.230  48.684  1.00  0.00     0.000 H 
ATOM   2177  CE2 PHE A 144      24.441  68.377  47.515  1.00 11.48     0.004 A 
ATOM   2178  HE2 PHE A 144      24.956  69.054  46.813  1.00  0.00     0.000 H 
ATOM   2179  CZ  PHE A 144      24.890  67.097  47.678  1.00 10.62    -0.003 A 
ATOM   2180  HZ  PHE A 144      25.764  66.737  47.109  1.00  0.00     0.000 H 
ATOM   2181  N   ALA A 145      18.310  66.864  50.756  1.00 25.02    -0.520 N 
ATOM   2182  HN  ALA A 145      18.335  66.165  50.013  1.00  0.00     0.248 HD
ATOM   2183  CA  ALA A 145      17.234  66.827  51.709  1.00 31.22     0.215 C 
ATOM   2184  HA  ALA A 145      17.510  67.424  52.609  1.00  0.00     0.000 H 
ATOM   2185  C   ALA A 145      16.974  65.382  52.114  1.00 37.68     0.526 C 
ATOM   2186  O   ALA A 145      16.047  65.062  52.872  1.00 42.45    -0.500 OA
ATOM   2187  CB  ALA A 145      15.971  67.385  51.098  1.00 28.91     0.031 C 
ATOM   2188  HB1 ALA A 145      15.137  67.356  51.837  1.00  0.00     0.000 H 
ATOM   2189  HB2 ALA A 145      15.703  66.864  50.149  1.00  0.00     0.000 H 
ATOM   2190  HB3 ALA A 145      16.126  68.410  50.686  1.00  0.00     0.000 H 
ATOM   2191  N   GLU A 146      17.775  64.422  51.670  1.00 41.42    -0.520 N 
ATOM   2192  HN  GLU A 146      18.597  64.664  51.116  1.00  0.00     0.248 HD
ATOM   2193  CA  GLU A 146      17.488  63.020  51.969  1.00 43.26     0.246 C 
ATOM   2194  HA  GLU A 146      16.882  62.927  52.900  1.00  0.00     0.000 H 
ATOM   2195  C   GLU A 146      18.831  62.395  52.142  1.00 44.09     0.526 C 
ATOM   2196  O   GLU A 146      19.573  62.715  51.217  1.00 44.56    -0.500 OA
ATOM   2197  CB  GLU A 146      16.801  62.351  50.812  1.00 41.97     0.000 C 
ATOM   2198  HB1 GLU A 146      16.890  61.241  50.865  1.00  0.00     0.000 H 
ATOM   2199  HB2 GLU A 146      17.347  62.518  49.855  1.00  0.00     0.000 H 
ATOM   2200  CG  GLU A 146      15.377  62.787  50.719  1.00 41.76    -0.208 C 
ATOM   2201  HG1 GLU A 146      15.149  63.658  51.377  1.00  0.00     0.000 H 
ATOM   2202  HG2 GLU A 146      14.672  62.060  51.185  1.00  0.00     0.000 H 
ATOM   2203  CD  GLU A 146      15.068  63.052  49.280  1.00 44.55     0.620 C 
ATOM   2204  OE1 GLU A 146      15.207  62.147  48.442  1.00 45.80    -0.706 OA
ATOM   2205  OE2 GLU A 146      14.705  64.183  48.995  1.00 46.33    -0.706 OA
ATOM   2206  N   SER A 147      19.284  61.601  53.135  1.00 43.94    -0.520 N 
ATOM   2207  HN  SER A 147      18.709  61.309  53.925  1.00  0.00     0.248 HD
ATOM   2208  CA  SER A 147      20.678  61.201  52.968  1.00 46.06     0.292 C 
ATOM   2209  HA  SER A 147      21.180  61.987  52.357  1.00  0.00     0.000 H 
ATOM   2210  C   SER A 147      20.872  59.886  52.260  1.00 46.71     0.526 C 
ATOM   2211  O   SER A 147      21.855  59.630  51.526  1.00 47.61    -0.500 OA
ATOM   2212  CB  SER A 147      21.368  61.146  54.270  1.00 47.70     0.194 C 
ATOM   2213  HB1 SER A 147      21.052  61.934  54.993  1.00  0.00     0.000 H 
ATOM   2214  HB2 SER A 147      21.079  60.279  54.908  1.00  0.00     0.000 H 
ATOM   2215  OG  SER A 147      22.743  61.186  53.922  1.00 50.04    -0.550 OA
ATOM   2216  HG  SER A 147      23.188  61.151  54.761  1.00  0.00     0.310 HD
ATOM   2217  N   GLY A 148      19.761  59.146  52.355  1.00 47.24    -0.520 N 
ATOM   2218  HN  GLY A 148      18.967  59.506  52.885  1.00  0.00     0.248 HD
ATOM   2219  CA  GLY A 148      19.657  57.832  51.716  1.00 42.04     0.246 C 
ATOM   2220  HA1 GLY A 148      20.601  57.250  51.830  1.00  0.00     0.000 H 
ATOM   2221  HA2 GLY A 148      18.968  57.160  52.280  1.00  0.00     0.000 H 
ATOM   2222  C   GLY A 148      19.252  57.942  50.269  1.00 33.74     0.526 C 
ATOM   2223  O   GLY A 148      18.214  57.400  49.875  1.00 28.13    -0.500 OA
ATOM   2224  N   GLN A 149      20.198  58.647  49.621  1.00 30.48    -0.520 N 
ATOM   2225  HN  GLN A 149      21.053  58.866  50.132  1.00  0.00     0.248 HD
ATOM   2226  CA  GLN A 149      20.099  59.115  48.269  1.00 28.85     0.210 C 
ATOM   2227  HA  GLN A 149      19.338  58.485  47.752  1.00  0.00     0.000 H 
ATOM   2228  C   GLN A 149      21.385  59.035  47.459  1.00 24.96     0.526 C 
ATOM   2229  O   GLN A 149      21.470  58.113  46.640  1.00 20.92    -0.500 OA
ATOM   2230  CB  GLN A 149      19.579  60.568  48.263  1.00 32.01     0.053 C 
ATOM   2231  HB1 GLN A 149      18.651  60.595  48.880  1.00  0.00     0.000 H 
ATOM   2232  HB2 GLN A 149      19.190  60.781  47.240  1.00  0.00     0.000 H 
ATOM   2233  CG  GLN A 149      20.437  61.746  48.679  1.00 34.39    -0.043 C 
ATOM   2234  HG1 GLN A 149      21.514  61.509  48.514  1.00  0.00     0.000 H 
ATOM   2235  HG2 GLN A 149      20.425  61.852  49.789  1.00  0.00     0.000 H 
ATOM   2236  CD  GLN A 149      20.090  63.086  48.022  1.00 36.16     0.675 C 
ATOM   2237  OE1 GLN A 149      20.439  63.393  46.869  1.00 38.04    -0.470 OA
ATOM   2238  NE2 GLN A 149      19.345  63.925  48.733  1.00 37.26    -0.867 N 
ATOM   2239 1HE2 GLN A 149      19.114  64.817  48.296  1.00  0.00     0.344 HD
ATOM   2240 2HE2 GLN A 149      19.059  63.673  49.679  1.00  0.00     0.344 HD
ATOM   2241  N   VAL A 150      22.400  59.905  47.692  1.00 23.03    -0.520 N 
ATOM   2242  HN  VAL A 150      22.301  60.573  48.457  1.00  0.00     0.248 HD
ATOM   2243  CA  VAL A 150      23.624  59.931  46.903  1.00 20.37     0.201 C 
ATOM   2244  HA  VAL A 150      23.481  59.216  46.060  1.00  0.00     0.000 H 
ATOM   2245  C   VAL A 150      24.874  59.489  47.651  1.00 17.18     0.526 C 
ATOM   2246  O   VAL A 150      25.280  60.071  48.636  1.00 21.55    -0.500 OA
ATOM   2247  CB  VAL A 150      23.760  61.353  46.273  1.00 18.90     0.033 C 
ATOM   2248  HB  VAL A 150      23.008  61.447  45.455  1.00  0.00     0.000 H 
ATOM   2249  CG1 VAL A 150      23.530  62.448  47.245  1.00 18.26     0.006 C 
ATOM   2250 1HG1 VAL A 150      23.627  63.464  46.795  1.00  0.00     0.000 H 
ATOM   2251 2HG1 VAL A 150      24.201  62.340  48.129  1.00  0.00     0.000 H 
ATOM   2252 3HG1 VAL A 150      22.542  62.330  47.748  1.00  0.00     0.000 H 
ATOM   2253  CG2 VAL A 150      25.150  61.450  45.658  1.00 19.12     0.006 C 
ATOM   2254 1HG2 VAL A 150      25.247  62.466  45.208  1.00  0.00     0.000 H 
ATOM   2255 2HG2 VAL A 150      25.362  60.631  44.932  1.00  0.00     0.000 H 
ATOM   2256 3HG2 VAL A 150      25.964  61.216  46.384  1.00  0.00     0.000 H 
ATOM   2257  N   TYR A 151      25.503  58.439  47.149  1.00 18.50    -0.520 N 
ATOM   2258  HN  TYR A 151      25.189  58.108  46.237  1.00  0.00     0.248 HD
ATOM   2259  CA  TYR A 151      26.606  57.705  47.775  1.00 16.70     0.245 C 
ATOM   2260  HA  TYR A 151      27.277  58.435  48.285  1.00  0.00     0.000 H 
ATOM   2261  C   TYR A 151      27.420  56.945  46.720  1.00 12.79     0.526 C 
ATOM   2262  O   TYR A 151      27.064  56.951  45.533  1.00 17.10    -0.500 OA
ATOM   2263  CB  TYR A 151      26.079  56.669  48.845  1.00 14.73     0.022 C 
ATOM   2264  HB1 TYR A 151      25.810  57.210  49.782  1.00  0.00     0.000 H 
ATOM   2265  HB2 TYR A 151      26.929  56.042  49.203  1.00  0.00     0.000 H 
ATOM   2266  CG  TYR A 151      24.926  55.768  48.433  1.00 11.01    -0.001 A 
ATOM   2267  CD1 TYR A 151      23.656  56.286  48.511  1.00 11.71    -0.035 A 
ATOM   2268  HD1 TYR A 151      23.505  57.290  48.941  1.00  0.00     0.000 H 
ATOM   2269  CD2 TYR A 151      25.118  54.501  47.905  1.00 11.32    -0.035 A 
ATOM   2270  HD2 TYR A 151      26.132  54.071  47.848  1.00  0.00     0.000 H 
ATOM   2271  CE1 TYR A 151      22.569  55.572  48.061  1.00  9.03     0.100 A 
ATOM   2272  HE1 TYR A 151      21.552  55.994  48.132  1.00  0.00     0.000 H 
ATOM   2273  CE2 TYR A 151      24.033  53.781  47.452  1.00  8.80     0.100 A 
ATOM   2274  HE2 TYR A 151      24.172  52.770  47.034  1.00  0.00     0.000 H 
ATOM   2275  CZ  TYR A 151      22.770  54.336  47.526  1.00  8.19    -0.121 A 
ATOM   2276  OH  TYR A 151      21.668  53.701  47.015  1.00 15.38    -0.368 OA
ATOM   2277  HH  TYR A 151      21.808  52.839  46.642  1.00  0.00     0.339 HD
ATOM   2278  N   PHE A 152      28.435  56.230  47.190  1.00  4.98    -0.520 N 
ATOM   2279  HN  PHE A 152      28.539  56.175  48.203  1.00  0.00     0.248 HD
ATOM   2280  CA  PHE A 152      29.404  55.524  46.387  1.00  2.94     0.214 C 
ATOM   2281  HA  PHE A 152      28.918  54.965  45.554  1.00  0.00     0.000 H 
ATOM   2282  C   PHE A 152      30.064  54.592  47.371  1.00  7.09     0.526 C 
ATOM   2283  O   PHE A 152      30.533  55.045  48.432  1.00  8.66    -0.500 OA
ATOM   2284  CB  PHE A 152      30.421  56.508  45.875  1.00  5.86     0.038 C 
ATOM   2285  HB1 PHE A 152      30.841  57.059  46.749  1.00  0.00     0.000 H 
ATOM   2286  HB2 PHE A 152      29.878  57.318  45.334  1.00  0.00     0.000 H 
ATOM   2287  CG  PHE A 152      31.572  56.054  45.009  1.00  5.89     0.011 A 
ATOM   2288  CD1 PHE A 152      32.713  56.812  45.011  1.00  4.29    -0.011 A 
ATOM   2289  HD1 PHE A 152      32.793  57.695  45.667  1.00  0.00     0.000 H 
ATOM   2290  CD2 PHE A 152      31.458  54.941  44.191  1.00  4.90    -0.011 A 
ATOM   2291  HD2 PHE A 152      30.537  54.334  44.195  1.00  0.00     0.000 H 
ATOM   2292  CE1 PHE A 152      33.763  56.461  44.184  1.00  6.02     0.004 A 
ATOM   2293  HE1 PHE A 152      34.685  57.067  44.176  1.00  0.00     0.000 H 
ATOM   2294  CE2 PHE A 152      32.506  54.609  43.380  1.00  5.77     0.004 A 
ATOM   2295  HE2 PHE A 152      32.427  53.727  42.722  1.00  0.00     0.000 H 
ATOM   2296  CZ  PHE A 152      33.660  55.360  43.373  1.00  6.77    -0.003 A 
ATOM   2297  HZ  PHE A 152      34.500  55.077  42.716  1.00  0.00     0.000 H 
ATOM   2298  N   GLY A 153      30.119  53.309  47.074  1.00  5.85    -0.520 N 
ATOM   2299  HN  GLY A 153      29.711  52.978  46.200  1.00  0.00     0.248 HD
ATOM   2300  CA  GLY A 153      30.741  52.375  47.956  1.00  7.41     0.246 C 
ATOM   2301  HA1 GLY A 153      31.519  52.854  48.594  1.00  0.00     0.000 H 
ATOM   2302  HA2 GLY A 153      30.052  52.040  48.767  1.00  0.00     0.000 H 
ATOM   2303  C   GLY A 153      31.285  51.229  47.172  1.00 13.13     0.526 C 
ATOM   2304  O   GLY A 153      30.955  51.045  45.989  1.00 17.83    -0.500 OA
ATOM   2305  N   ILE A 154      32.151  50.467  47.832  1.00 14.46    -0.520 N 
ATOM   2306  HN  ILE A 154      32.441  50.739  48.771  1.00  0.00     0.248 HD
ATOM   2307  CA  ILE A 154      32.691  49.259  47.246  1.00 15.59     0.199 C 
ATOM   2308  HA  ILE A 154      32.013  48.917  46.430  1.00  0.00     0.000 H 
ATOM   2309  C   ILE A 154      32.718  48.209  48.335  1.00 19.15     0.526 C 
ATOM   2310  O   ILE A 154      32.335  48.543  49.465  1.00 19.77    -0.500 OA
ATOM   2311  CB  ILE A 154      34.140  49.395  46.679  1.00 16.18     0.030 C 
ATOM   2312  HB  ILE A 154      34.609  48.384  46.675  1.00  0.00     0.000 H 
ATOM   2313  CG1 ILE A 154      35.052  50.335  47.427  1.00 15.04     0.017 C 
ATOM   2314 1HG1 ILE A 154      35.065  50.144  48.525  1.00  0.00     0.000 H 
ATOM   2315 2HG1 ILE A 154      34.663  51.379  47.464  1.00  0.00     0.000 H 
ATOM   2316  CG2 ILE A 154      33.940  49.823  45.261  1.00 15.29     0.001 C 
ATOM   2317 1HG2 ILE A 154      34.974  49.920  44.856  1.00  0.00     0.000 H 
ATOM   2318 2HG2 ILE A 154      33.315  50.739  45.144  1.00  0.00     0.000 H 
ATOM   2319 3HG2 ILE A 154      33.279  49.148  44.669  1.00  0.00     0.000 H 
ATOM   2320  CD1 ILE A 154      36.427  50.240  46.795  1.00 16.02    -0.001 C 
ATOM   2321 1HD1 ILE A 154      37.101  50.935  47.348  1.00  0.00     0.000 H 
ATOM   2322 2HD1 ILE A 154      36.414  50.431  45.697  1.00  0.00     0.000 H 
ATOM   2323 3HD1 ILE A 154      36.816  49.196  46.758  1.00  0.00     0.000 H 
ATOM   2324  N   ILE A 155      33.121  46.969  47.974  1.00 19.86    -0.520 N 
ATOM   2325  HN  ILE A 155      33.384  46.832  46.998  1.00  0.00     0.248 HD
ATOM   2326  CA  ILE A 155      33.214  45.807  48.857  1.00 19.28     0.199 C 
ATOM   2327  HA  ILE A 155      33.862  46.078  49.723  1.00  0.00     0.000 H 
ATOM   2328  C   ILE A 155      33.849  44.603  48.137  1.00 22.12     0.526 C 
ATOM   2329  O   ILE A 155      33.366  44.174  47.075  1.00 22.12    -0.500 OA
ATOM   2330  CB  ILE A 155      31.770  45.459  49.408  1.00 17.26     0.030 C 
ATOM   2331  HB  ILE A 155      31.431  46.308  50.047  1.00  0.00     0.000 H 
ATOM   2332  CG1 ILE A 155      31.796  44.192  50.276  1.00 20.59     0.017 C 
ATOM   2333 1HG1 ILE A 155      31.929  43.292  49.632  1.00  0.00     0.000 H 
ATOM   2334 2HG1 ILE A 155      32.741  44.155  50.867  1.00  0.00     0.000 H 
ATOM   2335  CG2 ILE A 155      30.803  45.322  48.263  1.00 19.30     0.001 C 
ATOM   2336 1HG2 ILE A 155      29.787  45.077  48.651  1.00  0.00     0.000 H 
ATOM   2337 2HG2 ILE A 155      31.152  44.580  47.507  1.00  0.00     0.000 H 
ATOM   2338 3HG2 ILE A 155      30.795  46.227  47.611  1.00  0.00     0.000 H 
ATOM   2339  CD1 ILE A 155      30.580  43.996  51.212  1.00 17.15    -0.001 C 
ATOM   2340 1HD1 ILE A 155      30.599  43.076  51.842  1.00  0.00     0.000 H 
ATOM   2341 2HD1 ILE A 155      29.635  44.033  50.621  1.00  0.00     0.000 H 
ATOM   2342 3HD1 ILE A 155      30.447  44.896  51.856  1.00  0.00     0.000 H 
ATOM   2343  N   ALA A 156      34.963  44.061  48.643  1.00 23.07    -0.520 N 
ATOM   2344  HN  ALA A 156      35.414  44.470  49.461  1.00  0.00     0.248 HD
ATOM   2345  CA  ALA A 156      35.524  42.869  48.001  1.00 25.09     0.215 C 
ATOM   2346  HA  ALA A 156      35.665  43.079  46.915  1.00  0.00     0.000 H 
ATOM   2347  C   ALA A 156      34.631  41.653  48.150  1.00 24.85     0.526 C 
ATOM   2348  O   ALA A 156      34.003  41.453  49.196  1.00 25.39    -0.500 OA
ATOM   2349  CB  ALA A 156      36.859  42.456  48.596  1.00 28.46     0.031 C 
ATOM   2350  HB1 ALA A 156      37.516  43.350  48.486  1.00  0.00     0.000 H 
ATOM   2351  HB2 ALA A 156      37.284  41.527  48.149  1.00  0.00     0.000 H 
ATOM   2352  HB3 ALA A 156      36.788  42.074  49.641  1.00  0.00     0.000 H 
ATOM   2353  N   LEU A 157      34.562  40.866  47.094  1.00 26.18    -0.520 N 
ATOM   2354  HN  LEU A 157      35.062  41.123  46.243  1.00  0.00     0.248 HD
ATOM   2355  CA  LEU A 157      33.788  39.642  47.124  1.00 27.63     0.198 C 
ATOM   2356  HA  LEU A 157      33.347  39.509  48.139  1.00  0.00     0.000 H 
ATOM   2357  C   LEU A 157      34.713  38.460  46.814  1.00 30.56     0.444 C 
ATOM   2358  O   LEU A 157      35.792  38.671  46.218  1.00 34.61    -0.706 OA
ATOM   2359  CB  LEU A 157      32.677  39.663  46.092  1.00 24.52     0.016 C 
ATOM   2360  HB1 LEU A 157      32.225  38.646  46.021  1.00  0.00     0.000 H 
ATOM   2361  HB2 LEU A 157      33.124  39.768  45.076  1.00  0.00     0.000 H 
ATOM   2362  CG  LEU A 157      31.590  40.671  46.255  1.00 23.07     0.054 C 
ATOM   2363  HG  LEU A 157      31.766  41.243  47.196  1.00  0.00     0.000 H 
ATOM   2364  CD1 LEU A 157      31.810  41.583  45.082  1.00 24.65    -0.014 C 
ATOM   2365 1HD1 LEU A 157      30.997  42.337  45.204  1.00  0.00     0.000 H 
ATOM   2366 2HD1 LEU A 157      31.831  41.073  44.090  1.00  0.00     0.000 H 
ATOM   2367 3HD1 LEU A 157      32.837  42.010  45.008  1.00  0.00     0.000 H 
ATOM   2368  CD2 LEU A 157      30.164  40.088  46.285  1.00 18.96    -0.014 C 
ATOM   2369 1HD2 LEU A 157      29.351  40.842  46.407  1.00  0.00     0.000 H 
ATOM   2370 2HD2 LEU A 157      30.084  39.304  47.074  1.00  0.00     0.000 H 
ATOM   2371 3HD2 LEU A 157      29.982  39.468  45.376  1.00  0.00     0.000 H 
ATOM   2372  OXT LEU A 157      34.333  37.338  47.161  1.00 32.20    -0.706 OA
TER    2373      LEU A 157 
ATOM   2373  N   ARG B   6      46.824  30.800  43.607  1.00 64.41    -0.263 N 
ATOM   2374  HN1 ARG B   6      46.955  30.936  44.609  1.00  0.00     0.312 HD
ATOM   2375  HN2 ARG B   6      47.487  30.111  43.252  1.00  0.00     0.312 HD
ATOM   2376  HN3 ARG B   6      45.948  30.309  43.427  1.00  0.00     0.312 HD
ATOM   2377  CA  ARG B   6      46.892  32.032  42.812  1.00 64.18     0.292 C 
ATOM   2378  HA  ARG B   6      47.816  32.616  43.032  1.00  0.00     0.000 H 
ATOM   2379  C   ARG B   6      45.651  32.737  43.313  1.00 61.83     0.526 C 
ATOM   2380  O   ARG B   6      44.655  32.031  43.466  1.00 62.89    -0.500 OA
ATOM   2381  CB  ARG B   6      46.694  31.827  41.299  1.00 64.17     0.049 C 
ATOM   2382  HB1 ARG B   6      46.746  32.763  40.695  1.00  0.00     0.000 H 
ATOM   2383  HB2 ARG B   6      45.737  31.290  41.102  1.00  0.00     0.000 H 
ATOM   2384  HB3 ARG B   6      47.419  31.074  40.911  1.00  0.00     0.000 H 
ATOM   2385  N   THR B   7      45.638  34.034  43.555  1.00 59.18    -0.520 N 
ATOM   2386  HN  THR B   7      46.443  34.617  43.324  1.00  0.00     0.248 HD
ATOM   2387  CA  THR B   7      44.447  34.613  44.159  1.00 59.19     0.268 C 
ATOM   2388  HA  THR B   7      43.701  33.793  44.280  1.00  0.00     0.000 H 
ATOM   2389  C   THR B   7      43.769  35.740  43.331  1.00 57.12     0.526 C 
ATOM   2390  O   THR B   7      43.503  36.844  43.819  1.00 59.02    -0.500 OA
ATOM   2391  CB  THR B   7      45.037  34.932  45.590  1.00 59.30     0.211 C 
ATOM   2392  HB  THR B   7      46.059  35.361  45.467  1.00  0.00     0.000 H 
ATOM   2393  OG1 THR B   7      45.155  33.630  46.159  1.00 58.04    -0.550 OA
ATOM   2394  HG1 THR B   7      45.510  33.822  47.019  1.00  0.00     0.310 HD
ATOM   2395  CG2 THR B   7      44.248  35.821  46.528  1.00 61.19     0.007 C 
ATOM   2396 1HG2 THR B   7      44.664  36.046  47.538  1.00  0.00     0.000 H 
ATOM   2397 2HG2 THR B   7      43.224  35.397  46.648  1.00  0.00     0.000 H 
ATOM   2398 3HG2 THR B   7      44.025  36.782  46.009  1.00  0.00     0.000 H 
ATOM   2399  N   PRO B   8      43.456  35.544  42.027  1.00 53.73    -0.257 N 
ATOM   2400  CA  PRO B   8      42.239  36.123  41.441  1.00 49.90     0.112 C 
ATOM   2401  HA  PRO B   8      42.347  37.231  41.384  1.00  0.00     0.000 H 
ATOM   2402  C   PRO B   8      41.031  35.775  42.311  1.00 46.32     0.526 C 
ATOM   2403  O   PRO B   8      40.629  36.613  43.119  1.00 45.06    -0.500 OA
ATOM   2404  CB  PRO B   8      42.223  35.539  40.021  1.00 50.73    -0.001 C 
ATOM   2405  HB1 PRO B   8      41.709  34.554  39.926  1.00  0.00     0.000 H 
ATOM   2406  HB2 PRO B   8      41.563  36.077  39.301  1.00  0.00     0.000 H 
ATOM   2407  CG  PRO B   8      43.700  35.528  39.649  1.00 50.60     0.036 C 
ATOM   2408  HG1 PRO B   8      43.954  34.892  38.769  1.00  0.00     0.000 H 
ATOM   2409  HG2 PRO B   8      44.077  36.481  39.211  1.00  0.00     0.000 H 
ATOM   2410  CD  PRO B   8      44.385  35.108  40.968  1.00 52.49     0.084 C 
ATOM   2411  HD1 PRO B   8      45.422  35.499  41.085  1.00  0.00     0.000 H 
ATOM   2412  HD2 PRO B   8      44.653  34.027  41.016  1.00  0.00     0.000 H 
ATOM   2413  N   SER B   9      40.492  34.550  42.218  1.00 43.27    -0.520 N 
ATOM   2414  HN  SER B   9      40.904  33.910  41.539  1.00  0.00     0.248 HD
ATOM   2415  CA  SER B   9      39.361  34.051  43.008  1.00 39.84     0.292 C 
ATOM   2416  HA  SER B   9      39.686  33.858  44.057  1.00  0.00     0.000 H 
ATOM   2417  C   SER B   9      38.903  32.740  42.353  1.00 40.18     0.526 C 
ATOM   2418  O   SER B   9      39.071  32.596  41.129  1.00 40.33    -0.500 OA
ATOM   2419  CB  SER B   9      38.178  35.022  42.998  1.00 36.07     0.194 C 
ATOM   2420  HB1 SER B   9      38.522  36.082  42.970  1.00  0.00     0.000 H 
ATOM   2421  HB2 SER B   9      37.634  34.990  42.025  1.00  0.00     0.000 H 
ATOM   2422  OG  SER B   9      37.305  34.793  44.084  1.00 38.02    -0.550 OA
ATOM   2423  HG  SER B   9      36.571  35.396  44.078  1.00  0.00     0.310 HD
ATOM   2424  N   ASP B  10      38.416  31.725  43.089  1.00 38.36    -0.520 N 
ATOM   2425  HN  ASP B  10      38.460  31.750  44.108  1.00  0.00     0.248 HD
ATOM   2426  CA  ASP B  10      37.829  30.600  42.401  1.00 38.47     0.246 C 
ATOM   2427  HA  ASP B  10      38.069  30.656  41.314  1.00  0.00     0.000 H 
ATOM   2428  C   ASP B  10      36.335  30.859  42.616  1.00 35.97     0.526 C 
ATOM   2429  O   ASP B  10      35.642  30.107  43.316  1.00 39.48    -0.500 OA
ATOM   2430  CB  ASP B  10      38.237  29.168  42.970  1.00 42.79    -0.208 C 
ATOM   2431  HB1 ASP B  10      37.843  29.086  44.010  1.00  0.00     0.000 H 
ATOM   2432  HB2 ASP B  10      39.339  29.167  43.141  1.00  0.00     0.000 H 
ATOM   2433  CG  ASP B  10      37.859  27.831  42.195  1.00 44.04     0.620 C 
ATOM   2434  OD1 ASP B  10      38.362  26.755  42.564  1.00 46.12    -0.706 OA
ATOM   2435  OD2 ASP B  10      37.071  27.808  41.237  1.00 41.33    -0.706 OA
ATOM   2436  N   LYS B  11      35.825  31.969  42.055  1.00 30.40    -0.520 N 
ATOM   2437  HN  LYS B  11      36.455  32.613  41.576  1.00  0.00     0.248 HD
ATOM   2438  CA  LYS B  11      34.394  32.285  42.108  1.00 26.78     0.227 C 
ATOM   2439  HA  LYS B  11      33.836  31.487  42.652  1.00  0.00     0.000 H 
ATOM   2440  C   LYS B  11      33.968  32.338  40.654  1.00 22.11     0.526 C 
ATOM   2441  O   LYS B  11      34.746  32.944  39.913  1.00 25.99    -0.500 OA
ATOM   2442  CB  LYS B  11      34.062  33.646  42.673  1.00 29.13     0.039 C 
ATOM   2443  HB1 LYS B  11      33.022  33.935  42.392  1.00  0.00     0.000 H 
ATOM   2444  HB2 LYS B  11      34.636  34.435  42.134  1.00  0.00     0.000 H 
ATOM   2445  CG  LYS B  11      34.257  33.789  44.171  1.00 35.54     0.053 C 
ATOM   2446  HG1 LYS B  11      34.987  34.588  44.438  1.00  0.00     0.000 H 
ATOM   2447  HG2 LYS B  11      34.808  32.930  44.619  1.00  0.00     0.000 H 
ATOM   2448  CD  LYS B  11      32.886  34.006  44.802  1.00 39.15     0.048 C 
ATOM   2449  HD1 LYS B  11      32.318  34.791  44.250  1.00  0.00     0.000 H 
ATOM   2450  HD2 LYS B  11      32.223  33.129  44.614  1.00  0.00     0.000 H 
ATOM   2451  CE  LYS B  11      32.943  34.332  46.302  1.00 42.42     0.218 C 
ATOM   2452  HE1 LYS B  11      33.731  35.094  46.507  1.00  0.00     0.000 H 
ATOM   2453  HE2 LYS B  11      32.040  34.907  46.612  1.00  0.00     0.000 H 
ATOM   2454  NZ  LYS B  11      33.125  33.161  47.160  1.00 43.61    -0.272 N 
ATOM   2455  HZ1 LYS B  11      33.163  33.377  48.156  1.00  0.00     0.311 HD
ATOM   2456  HZ2 LYS B  11      33.951  32.635  46.877  1.00  0.00     0.311 HD
ATOM   2457  HZ3 LYS B  11      32.404  32.464  46.972  1.00  0.00     0.311 HD
ATOM   2458  N   PRO B  12      32.871  31.726  40.164  1.00 13.88    -0.257 N 
ATOM   2459  CA  PRO B  12      32.207  32.029  38.908  1.00 11.92     0.112 C 
ATOM   2460  HA  PRO B  12      32.867  31.729  38.061  1.00  0.00     0.000 H 
ATOM   2461  C   PRO B  12      31.877  33.477  38.786  1.00  9.98     0.526 C 
ATOM   2462  O   PRO B  12      31.127  33.967  39.620  1.00 10.99    -0.500 OA
ATOM   2463  CB  PRO B  12      30.944  31.213  38.866  1.00 14.28    -0.001 C 
ATOM   2464  HB1 PRO B  12      30.022  31.835  38.784  1.00  0.00     0.000 H 
ATOM   2465  HB2 PRO B  12      30.818  30.648  37.913  1.00  0.00     0.000 H 
ATOM   2466  CG  PRO B  12      30.955  30.334  40.074  1.00 13.15     0.036 C 
ATOM   2467  HG1 PRO B  12      30.105  30.527  40.770  1.00  0.00     0.000 H 
ATOM   2468  HG2 PRO B  12      30.710  29.270  39.849  1.00  0.00     0.000 H 
ATOM   2469  CD  PRO B  12      32.325  30.516  40.725  1.00 12.28     0.084 C 
ATOM   2470  HD1 PRO B  12      32.993  29.631  40.611  1.00  0.00     0.000 H 
ATOM   2471  HD2 PRO B  12      32.292  30.517  41.840  1.00  0.00     0.000 H 
ATOM   2472  N   VAL B  13      32.329  34.182  37.775  1.00 11.80    -0.520 N 
ATOM   2473  HN  VAL B  13      32.866  33.742  37.028  1.00  0.00     0.248 HD
ATOM   2474  CA  VAL B  13      32.045  35.594  37.751  1.00 12.96     0.201 C 
ATOM   2475  HA  VAL B  13      31.112  35.804  38.324  1.00  0.00     0.000 H 
ATOM   2476  C   VAL B  13      31.862  35.979  36.319  1.00 15.46     0.526 C 
ATOM   2477  O   VAL B  13      32.518  35.386  35.454  1.00 14.70    -0.500 OA
ATOM   2478  CB  VAL B  13      33.218  36.374  38.357  1.00 16.26     0.033 C 
ATOM   2479  HB  VAL B  13      33.439  35.959  39.368  1.00  0.00     0.000 H 
ATOM   2480  CG1 VAL B  13      34.487  36.249  37.482  1.00 16.84     0.006 C 
ATOM   2481 1HG1 VAL B  13      35.340  36.816  37.923  1.00  0.00     0.000 H 
ATOM   2482 2HG1 VAL B  13      34.290  36.558  36.429  1.00  0.00     0.000 H 
ATOM   2483 3HG1 VAL B  13      34.755  35.182  37.300  1.00  0.00     0.000 H 
ATOM   2484  CG2 VAL B  13      32.805  37.830  38.508  1.00 18.96     0.006 C 
ATOM   2485 1HG2 VAL B  13      33.658  38.397  38.949  1.00  0.00     0.000 H 
ATOM   2486 2HG2 VAL B  13      31.864  37.949  39.094  1.00  0.00     0.000 H 
ATOM   2487 3HG2 VAL B  13      32.446  38.274  37.550  1.00  0.00     0.000 H 
ATOM   2488  N   ALA B  14      31.037  36.969  36.043  1.00 17.08    -0.520 N 
ATOM   2489  HN  ALA B  14      30.424  37.351  36.763  1.00  0.00     0.248 HD
ATOM   2490  CA  ALA B  14      31.017  37.503  34.700  1.00 23.32     0.215 C 
ATOM   2491  HA  ALA B  14      32.042  37.415  34.269  1.00  0.00     0.000 H 
ATOM   2492  C   ALA B  14      30.618  38.985  34.709  1.00 24.30     0.526 C 
ATOM   2493  O   ALA B  14      29.929  39.483  35.636  1.00 22.28    -0.500 OA
ATOM   2494  CB  ALA B  14      30.029  36.724  33.785  1.00 25.49     0.031 C 
ATOM   2495  HB1 ALA B  14      30.319  35.647  33.778  1.00  0.00     0.000 H 
ATOM   2496  HB2 ALA B  14      29.969  37.155  32.759  1.00  0.00     0.000 H 
ATOM   2497  HB3 ALA B  14      28.965  36.877  34.080  1.00  0.00     0.000 H 
ATOM   2498  N   HIS B  15      31.152  39.634  33.651  1.00 22.53    -0.520 N 
ATOM   2499  HN  HIS B  15      31.804  39.140  33.042  1.00  0.00     0.248 HD
ATOM   2500  CA  HIS B  15      30.825  41.000  33.364  1.00 23.40     0.195 C 
ATOM   2501  HA  HIS B  15      29.761  41.166  33.652  1.00  0.00     0.000 H 
ATOM   2502  C   HIS B  15      30.972  41.352  31.894  1.00 21.61     0.526 C 
ATOM   2503  O   HIS B  15      31.919  42.014  31.494  1.00 19.77    -0.500 OA
ATOM   2504  CB  HIS B  15      31.683  41.945  34.184  1.00 22.04     0.211 C 
ATOM   2505  HB1 HIS B  15      32.760  41.901  33.901  1.00  0.00     0.000 H 
ATOM   2506  HB2 HIS B  15      31.791  41.616  35.244  1.00  0.00     0.000 H 
ATOM   2507  CG  HIS B  15      31.098  43.360  34.062  1.00 23.53     0.103 A 
ATOM   2508  ND1 HIS B  15      29.933  43.805  34.537  1.00 23.67    -0.613 N 
ATOM   2509  HD1 HIS B  15      29.236  43.267  35.052  1.00  0.00     0.478 HD
ATOM   2510  CD2 HIS B  15      31.730  44.409  33.421  1.00 21.26     0.353 A 
ATOM   2511  HD2 HIS B  15      32.707  44.383  32.909  1.00  0.00     0.000 H 
ATOM   2512  CE1 HIS B  15      29.865  45.072  34.209  1.00 24.02     0.719 A 
ATOM   2513  HE1 HIS B  15      29.025  45.743  34.456  1.00  0.00     0.000 H 
ATOM   2514  NE2 HIS B  15      30.940  45.429  33.545  1.00 21.50    -0.686 N 
ATOM   2515  HE2 HIS B  15      31.125  46.364  33.183  1.00  0.00     0.486 HD
ATOM   2516  N   VAL B  16      30.004  40.951  31.089  1.00 23.18    -0.520 N 
ATOM   2517  HN  VAL B  16      29.226  40.400  31.451  1.00  0.00     0.248 HD
ATOM   2518  CA  VAL B  16      30.062  41.306  29.680  1.00 25.76     0.201 C 
ATOM   2519  HA  VAL B  16      31.141  41.396  29.413  1.00  0.00     0.000 H 
ATOM   2520  C   VAL B  16      29.404  42.630  29.317  1.00 24.37     0.526 C 
ATOM   2521  O   VAL B  16      28.342  43.012  29.831  1.00 21.38    -0.500 OA
ATOM   2522  CB  VAL B  16      29.457  40.176  28.766  1.00 26.09     0.033 C 
ATOM   2523  HB  VAL B  16      29.482  40.523  27.707  1.00  0.00     0.000 H 
ATOM   2524  CG1 VAL B  16      30.377  38.973  28.904  1.00 22.15     0.006 C 
ATOM   2525 1HG1 VAL B  16      29.948  38.173  28.257  1.00  0.00     0.000 H 
ATOM   2526 2HG1 VAL B  16      30.530  38.652  29.961  1.00  0.00     0.000 H 
ATOM   2527 3HG1 VAL B  16      31.443  39.204  28.674  1.00  0.00     0.000 H 
ATOM   2528  CG2 VAL B  16      28.031  39.797  29.118  1.00 28.07     0.006 C 
ATOM   2529 1HG2 VAL B  16      27.602  38.997  28.471  1.00  0.00     0.000 H 
ATOM   2530 2HG2 VAL B  16      27.374  40.698  29.114  1.00  0.00     0.000 H 
ATOM   2531 3HG2 VAL B  16      27.955  39.513  30.194  1.00  0.00     0.000 H 
ATOM   2532  N   VAL B  17      30.143  43.318  28.447  1.00 25.62    -0.520 N 
ATOM   2533  HN  VAL B  17      31.047  42.933  28.175  1.00  0.00     0.248 HD
ATOM   2534  CA  VAL B  17      29.734  44.591  27.861  1.00 23.79     0.201 C 
ATOM   2535  HA  VAL B  17      28.979  45.076  28.523  1.00  0.00     0.000 H 
ATOM   2536  C   VAL B  17      29.090  44.272  26.510  1.00 21.75     0.526 C 
ATOM   2537  O   VAL B  17      29.270  43.181  25.958  1.00 21.59    -0.500 OA
ATOM   2538  CB  VAL B  17      31.001  45.539  27.727  1.00 22.85     0.033 C 
ATOM   2539  HB  VAL B  17      31.869  45.066  28.242  1.00  0.00     0.000 H 
ATOM   2540  CG1 VAL B  17      31.416  45.944  26.312  1.00 16.65     0.006 C 
ATOM   2541 1HG1 VAL B  17      32.306  46.610  26.218  1.00  0.00     0.000 H 
ATOM   2542 2HG1 VAL B  17      30.548  46.406  25.787  1.00  0.00     0.000 H 
ATOM   2543 3HG1 VAL B  17      31.568  45.030  25.692  1.00  0.00     0.000 H 
ATOM   2544  CG2 VAL B  17      30.601  46.817  28.482  1.00 26.32     0.006 C 
ATOM   2545 1HG2 VAL B  17      31.491  47.483  28.388  1.00  0.00     0.000 H 
ATOM   2546 2HG2 VAL B  17      30.271  46.642  29.533  1.00  0.00     0.000 H 
ATOM   2547 3HG2 VAL B  17      29.648  47.276  28.129  1.00  0.00     0.000 H 
ATOM   2548  N   ALA B  18      28.269  45.197  26.013  1.00 18.40    -0.520 N 
ATOM   2549  HN  ALA B  18      28.055  46.038  26.549  1.00  0.00     0.248 HD
ATOM   2550  CA  ALA B  18      27.690  44.997  24.715  1.00 18.07     0.215 C 
ATOM   2551  HA  ALA B  18      27.513  43.908  24.555  1.00  0.00     0.000 H 
ATOM   2552  C   ALA B  18      28.638  45.519  23.632  1.00 22.05     0.526 C 
ATOM   2553  O   ALA B  18      29.420  46.492  23.749  1.00 19.56    -0.500 OA
ATOM   2554  CB  ALA B  18      26.404  45.725  24.587  1.00 18.07     0.031 C 
ATOM   2555  HB1 ALA B  18      25.714  45.345  25.376  1.00  0.00     0.000 H 
ATOM   2556  HB2 ALA B  18      25.969  45.656  23.563  1.00  0.00     0.000 H 
ATOM   2557  HB3 ALA B  18      26.530  46.832  24.621  1.00  0.00     0.000 H 
ATOM   2558  N   ASN B  19      28.578  44.793  22.530  1.00 23.16    -0.520 N 
ATOM   2559  HN  ASN B  19      27.909  44.026  22.464  1.00  0.00     0.248 HD
ATOM   2560  CA  ASN B  19      29.445  45.076  21.428  1.00 24.28     0.217 C 
ATOM   2561  HA  ASN B  19      30.476  45.260  21.811  1.00  0.00     0.000 H 
ATOM   2562  C   ASN B  19      28.963  46.312  20.671  1.00 27.16     0.526 C 
ATOM   2563  O   ASN B  19      27.775  46.433  20.342  1.00 27.68    -0.500 OA
ATOM   2564  CB  ASN B  19      29.443  43.843  20.613  1.00 23.45     0.003 C 
ATOM   2565  HB1 ASN B  19      29.672  42.965  21.260  1.00  0.00     0.000 H 
ATOM   2566  HB2 ASN B  19      28.400  43.600  20.302  1.00  0.00     0.000 H 
ATOM   2567  CG  ASN B  19      30.349  43.834  19.404  1.00 25.44     0.675 C 
ATOM   2568  OD1 ASN B  19      30.231  42.857  18.676  1.00 25.02    -0.470 OA
ATOM   2569  ND2 ASN B  19      31.291  44.738  19.063  1.00 27.56    -0.867 N 
ATOM   2570 1HD2 ASN B  19      31.903  44.732  18.247  1.00  0.00     0.344 HD
ATOM   2571 2HD2 ASN B  19      31.389  45.552  19.670  1.00  0.00     0.344 HD
ATOM   2572  N   PRO B  20      29.849  47.274  20.398  1.00 26.41    -0.257 N 
ATOM   2573  CA  PRO B  20      29.548  48.431  19.558  1.00 30.01     0.112 C 
ATOM   2574  HA  PRO B  20      28.601  48.891  19.927  1.00  0.00     0.000 H 
ATOM   2575  C   PRO B  20      29.382  48.131  18.060  1.00 31.22     0.526 C 
ATOM   2576  O   PRO B  20      28.553  48.747  17.384  1.00 33.25    -0.500 OA
ATOM   2577  CB  PRO B  20      30.685  49.394  19.848  1.00 30.00    -0.001 C 
ATOM   2578  HB1 PRO B  20      30.435  50.474  19.732  1.00  0.00     0.000 H 
ATOM   2579  HB2 PRO B  20      31.508  49.400  19.095  1.00  0.00     0.000 H 
ATOM   2580  CG  PRO B  20      31.082  48.978  21.219  1.00 28.27     0.036 C 
ATOM   2581  HG1 PRO B  20      32.023  49.437  21.603  1.00  0.00     0.000 H 
ATOM   2582  HG2 PRO B  20      30.438  49.368  22.041  1.00  0.00     0.000 H 
ATOM   2583  CD  PRO B  20      31.108  47.472  21.077  1.00 25.66     0.084 C 
ATOM   2584  HD1 PRO B  20      32.007  47.043  20.576  1.00  0.00     0.000 H 
ATOM   2585  HD2 PRO B  20      31.252  46.894  22.020  1.00  0.00     0.000 H 
ATOM   2586  N   GLN B  21      30.136  47.209  17.453  1.00 30.06    -0.520 N 
ATOM   2587  HN  GLN B  21      30.860  46.707  17.967  1.00  0.00     0.248 HD
ATOM   2588  CA  GLN B  21      29.902  46.938  16.043  1.00 29.01     0.210 C 
ATOM   2589  HA  GLN B  21      29.827  47.916  15.513  1.00  0.00     0.000 H 
ATOM   2590  C   GLN B  21      28.627  46.166  15.782  1.00 25.68     0.526 C 
ATOM   2591  O   GLN B  21      28.600  45.528  14.750  1.00 26.25    -0.500 OA
ATOM   2592  CB  GLN B  21      31.086  46.150  15.428  1.00 34.27     0.053 C 
ATOM   2593  HB1 GLN B  21      30.732  45.554  14.554  1.00  0.00     0.000 H 
ATOM   2594  HB2 GLN B  21      31.395  45.329  16.117  1.00  0.00     0.000 H 
ATOM   2595  CG  GLN B  21      32.306  46.983  15.031  1.00 37.20    -0.043 C 
ATOM   2596  HG1 GLN B  21      32.093  47.666  14.176  1.00  0.00     0.000 H 
ATOM   2597  HG2 GLN B  21      33.100  46.368  14.547  1.00  0.00     0.000 H 
ATOM   2598  CD  GLN B  21      32.814  47.725  16.247  1.00 38.99     0.675 C 
ATOM   2599  OE1 GLN B  21      33.481  47.088  17.064  1.00 41.11    -0.470 OA
ATOM   2600  NE2 GLN B  21      32.433  48.991  16.495  1.00 37.64    -0.867 N 
ATOM   2601 1HE2 GLN B  21      32.776  49.491  17.315  1.00  0.00     0.344 HD
ATOM   2602 2HE2 GLN B  21      31.881  49.518  15.819  1.00  0.00     0.344 HD
ATOM   2603  N   ALA B  22      27.530  46.144  16.528  1.00 24.37    -0.520 N 
ATOM   2604  HN  ALA B  22      27.446  46.710  17.372  1.00  0.00     0.248 HD
ATOM   2605  CA  ALA B  22      26.465  45.284  16.090  1.00 28.13     0.215 C 
ATOM   2606  HA  ALA B  22      26.773  44.788  15.140  1.00  0.00     0.000 H 
ATOM   2607  C   ALA B  22      25.209  46.079  15.836  1.00 32.63     0.526 C 
ATOM   2608  O   ALA B  22      24.717  46.792  16.702  1.00 34.27    -0.500 OA
ATOM   2609  CB  ALA B  22      26.222  44.231  17.125  1.00 28.15     0.031 C 
ATOM   2610  HB1 ALA B  22      25.396  43.564  16.785  1.00  0.00     0.000 H 
ATOM   2611  HB2 ALA B  22      26.026  44.666  18.133  1.00  0.00     0.000 H 
ATOM   2612  HB3 ALA B  22      27.148  43.663  17.375  1.00  0.00     0.000 H 
ATOM   2613  N   GLU B  23      24.725  46.055  14.582  1.00 36.69    -0.520 N 
ATOM   2614  HN  GLU B  23      25.236  45.565  13.848  1.00  0.00     0.248 HD
ATOM   2615  CA  GLU B  23      23.468  46.731  14.271  1.00 38.69     0.246 C 
ATOM   2616  HA  GLU B  23      23.511  47.784  14.636  1.00  0.00     0.000 H 
ATOM   2617  C   GLU B  23      22.407  45.978  15.030  1.00 38.35     0.526 C 
ATOM   2618  O   GLU B  23      22.607  44.805  15.316  1.00 37.96    -0.500 OA
ATOM   2619  CB  GLU B  23      23.105  46.720  12.745  1.00 40.01     0.000 C 
ATOM   2620  HB1 GLU B  23      22.009  46.898  12.640  1.00  0.00     0.000 H 
ATOM   2621  HB2 GLU B  23      23.525  47.639  12.274  1.00  0.00     0.000 H 
ATOM   2622  CG  GLU B  23      23.483  45.524  11.889  1.00 45.37    -0.208 C 
ATOM   2623  HG1 GLU B  23      23.717  45.868  10.855  1.00  0.00     0.000 H 
ATOM   2624  HG2 GLU B  23      24.479  45.139  12.210  1.00  0.00     0.000 H 
ATOM   2625  CD  GLU B  23      22.478  44.355  11.825  1.00 51.19     0.620 C 
ATOM   2626  OE1 GLU B  23      22.121  43.732  12.846  1.00 51.15    -0.706 OA
ATOM   2627  OE2 GLU B  23      22.058  44.044  10.701  1.00 53.83    -0.706 OA
ATOM   2628  N   GLY B  24      21.374  46.706  15.435  1.00 38.14    -0.520 N 
ATOM   2629  HN  GLY B  24      21.432  47.717  15.309  1.00  0.00     0.248 HD
ATOM   2630  CA  GLY B  24      20.171  46.175  16.042  1.00 35.63     0.246 C 
ATOM   2631  HA1 GLY B  24      19.289  46.448  15.417  1.00  0.00     0.000 H 
ATOM   2632  HA2 GLY B  24      19.947  46.741  16.976  1.00  0.00     0.000 H 
ATOM   2633  C   GLY B  24      20.140  44.685  16.335  1.00 34.13     0.526 C 
ATOM   2634  O   GLY B  24      19.569  43.847  15.625  1.00 34.14    -0.500 OA
ATOM   2635  N   GLN B  25      20.937  44.456  17.369  1.00 33.56    -0.520 N 
ATOM   2636  HN  GLN B  25      21.519  45.231  17.688  1.00  0.00     0.248 HD
ATOM   2637  CA  GLN B  25      21.055  43.196  18.090  1.00 29.13     0.210 C 
ATOM   2638  HA  GLN B  25      20.055  42.826  18.415  1.00  0.00     0.000 H 
ATOM   2639  C   GLN B  25      21.871  43.632  19.260  1.00 23.87     0.526 C 
ATOM   2640  O   GLN B  25      22.500  44.687  19.218  1.00 22.58    -0.500 OA
ATOM   2641  CB  GLN B  25      21.837  42.099  17.365  1.00 29.54     0.053 C 
ATOM   2642  HB1 GLN B  25      21.767  41.144  17.935  1.00  0.00     0.000 H 
ATOM   2643  HB2 GLN B  25      21.306  41.811  16.428  1.00  0.00     0.000 H 
ATOM   2644  CG  GLN B  25      23.278  42.410  17.062  1.00 30.52    -0.043 C 
ATOM   2645  HG1 GLN B  25      23.926  42.299  17.962  1.00  0.00     0.000 H 
ATOM   2646  HG2 GLN B  25      23.439  43.498  16.876  1.00  0.00     0.000 H 
ATOM   2647  CD  GLN B  25      23.761  41.567  15.915  1.00 30.28     0.675 C 
ATOM   2648  OE1 GLN B  25      23.608  41.885  14.735  1.00 29.93    -0.470 OA
ATOM   2649  NE2 GLN B  25      24.349  40.443  16.291  1.00 29.73    -0.867 N 
ATOM   2650 1HE2 GLN B  25      24.677  39.871  15.513  1.00  0.00     0.344 HD
ATOM   2651 2HE2 GLN B  25      24.476  40.180  17.268  1.00  0.00     0.344 HD
ATOM   2652  N   LEU B  26      21.786  42.783  20.277  1.00 24.38    -0.520 N 
ATOM   2653  HN  LEU B  26      21.166  41.980  20.168  1.00  0.00     0.248 HD
ATOM   2654  CA  LEU B  26      22.505  42.907  21.530  1.00 20.84     0.204 C 
ATOM   2655  HA  LEU B  26      23.066  43.870  21.560  1.00  0.00     0.000 H 
ATOM   2656  C   LEU B  26      23.482  41.720  21.560  1.00 19.45     0.526 C 
ATOM   2657  O   LEU B  26      23.145  40.556  21.732  1.00 14.77    -0.500 OA
ATOM   2658  CB  LEU B  26      21.440  42.872  22.648  1.00 19.14     0.016 C 
ATOM   2659  HB1 LEU B  26      20.782  41.994  22.450  1.00  0.00     0.000 H 
ATOM   2660  HB2 LEU B  26      20.752  43.732  22.476  1.00  0.00     0.000 H 
ATOM   2661  CG  LEU B  26      21.778  42.856  24.119  1.00 17.92     0.054 C 
ATOM   2662  HG  LEU B  26      22.071  41.820  24.408  1.00  0.00     0.000 H 
ATOM   2663  CD1 LEU B  26      22.909  43.789  24.452  1.00 15.22    -0.014 C 
ATOM   2664 1HD1 LEU B  26      23.159  43.777  25.539  1.00  0.00     0.000 H 
ATOM   2665 2HD1 LEU B  26      22.695  44.825  24.099  1.00  0.00     0.000 H 
ATOM   2666 3HD1 LEU B  26      23.808  43.572  23.829  1.00  0.00     0.000 H 
ATOM   2667  CD2 LEU B  26      20.508  43.226  24.856  1.00 19.96    -0.014 C 
ATOM   2668 1HD2 LEU B  26      20.758  43.214  25.943  1.00  0.00     0.000 H 
ATOM   2669 2HD2 LEU B  26      19.641  42.576  24.595  1.00  0.00     0.000 H 
ATOM   2670 3HD2 LEU B  26      20.065  44.191  24.515  1.00  0.00     0.000 H 
ATOM   2671  N   GLN B  27      24.716  42.025  21.326  1.00 18.06    -0.520 N 
ATOM   2672  HN  GLN B  27      24.957  43.006  21.186  1.00  0.00     0.248 HD
ATOM   2673  CA  GLN B  27      25.763  41.046  21.254  1.00 22.66     0.210 C 
ATOM   2674  HA  GLN B  27      25.359  40.007  21.214  1.00  0.00     0.000 H 
ATOM   2675  C   GLN B  27      26.512  41.316  22.557  1.00 20.05     0.526 C 
ATOM   2676  O   GLN B  27      26.862  42.480  22.770  1.00 19.00    -0.500 OA
ATOM   2677  CB  GLN B  27      26.577  41.388  20.013  1.00 27.83     0.053 C 
ATOM   2678  HB1 GLN B  27      25.864  41.579  19.177  1.00  0.00     0.000 H 
ATOM   2679  HB2 GLN B  27      27.029  42.396  20.166  1.00  0.00     0.000 H 
ATOM   2680  CG  GLN B  27      27.663  40.462  19.498  1.00 34.60    -0.043 C 
ATOM   2681  HG1 GLN B  27      28.367  41.003  18.823  1.00  0.00     0.000 H 
ATOM   2682  HG2 GLN B  27      28.374  40.184  20.310  1.00  0.00     0.000 H 
ATOM   2683  CD  GLN B  27      27.089  39.219  18.817  1.00 40.82     0.675 C 
ATOM   2684  OE1 GLN B  27      26.061  39.290  18.126  1.00 46.05    -0.470 OA
ATOM   2685  NE2 GLN B  27      27.690  38.031  18.964  1.00 41.58    -0.867 N 
ATOM   2686 1HE2 GLN B  27      28.535  37.973  19.532  1.00  0.00     0.344 HD
ATOM   2687 2HE2 GLN B  27      27.307  37.202  18.510  1.00  0.00     0.344 HD
ATOM   2688  N   TRP B  28      26.769  40.320  23.410  1.00 18.43    -0.520 N 
ATOM   2689  HN  TRP B  28      26.416  39.394  23.170  1.00  0.00     0.248 HD
ATOM   2690  CA  TRP B  28      27.515  40.452  24.660  1.00 12.31     0.248 C 
ATOM   2691  HA  TRP B  28      27.501  41.519  24.984  1.00  0.00     0.000 H 
ATOM   2692  C   TRP B  28      28.955  40.018  24.428  1.00 12.81     0.526 C 
ATOM   2693  O   TRP B  28      29.233  39.131  23.621  1.00 14.09    -0.500 OA
ATOM   2694  CB  TRP B  28      26.860  39.600  25.726  1.00  8.46     0.020 C 
ATOM   2695  HB1 TRP B  28      26.686  38.562  25.358  1.00  0.00     0.000 H 
ATOM   2696  HB2 TRP B  28      27.571  39.380  26.556  1.00  0.00     0.000 H 
ATOM   2697  CG  TRP B  28      25.575  40.214  26.256  1.00  8.98     0.046 A 
ATOM   2698  CD1 TRP B  28      24.392  39.518  26.227  1.00  8.45     0.117 A 
ATOM   2699  HD1 TRP B  28      24.214  38.521  25.791  1.00  0.00     0.000 H 
ATOM   2700  CD2 TRP B  28      25.449  41.445  26.867  1.00  7.09    -0.275 A 
ATOM   2701  NE1 TRP B  28      23.514  40.292  26.830  1.00  7.54    -0.330 N 
ATOM   2702  HE1 TRP B  28      22.532  40.058  26.972  1.00  0.00     0.294 HD
ATOM   2703  CE2 TRP B  28      24.096  41.435  27.232  1.00  8.71     0.000 A 
ATOM   2704  CE3 TRP B  28      26.232  42.524  27.175  1.00  6.78     0.145 A 
ATOM   2705  HE3 TRP B  28      27.299  42.545  26.896  1.00  0.00     0.000 H 
ATOM   2706  CZ2 TRP B  28      23.511  42.507  27.914  1.00 10.77     0.029 A 
ATOM   2707  HZ2 TRP B  28      22.445  42.488  28.197  1.00  0.00     0.000 H 
ATOM   2708  CZ3 TRP B  28      25.651  43.593  27.848  1.00 11.22    -0.082 A 
ATOM   2709  HZ3 TRP B  28      26.274  44.470  28.092  1.00  0.00     0.000 H 
ATOM   2710  CH2 TRP B  28      24.314  43.596  28.224  1.00  9.03     0.034 A 
ATOM   2711  HH2 TRP B  28      23.892  44.459  28.766  1.00  0.00     0.000 H 
ATOM   2712  N   LEU B  29      29.904  40.593  25.152  1.00 15.05    -0.520 N 
ATOM   2713  HN  LEU B  29      29.633  41.148  25.963  1.00  0.00     0.248 HD
ATOM   2714  CA  LEU B  29      31.301  40.465  24.839  1.00 12.74     0.204 C 
ATOM   2715  HA  LEU B  29      31.530  39.435  24.479  1.00  0.00     0.000 H 
ATOM   2716  C   LEU B  29      32.098  40.784  26.087  1.00 19.60     0.526 C 
ATOM   2717  O   LEU B  29      31.956  41.817  26.778  1.00 16.58    -0.500 OA
ATOM   2718  CB  LEU B  29      31.637  41.481  23.784  1.00 11.61     0.016 C 
ATOM   2719  HB1 LEU B  29      31.976  42.380  24.349  1.00  0.00     0.000 H 
ATOM   2720  HB2 LEU B  29      30.654  41.783  23.353  1.00  0.00     0.000 H 
ATOM   2721  CG  LEU B  29      32.568  41.392  22.602  1.00 12.34     0.054 C 
ATOM   2722  HG  LEU B  29      33.381  40.650  22.782  1.00  0.00     0.000 H 
ATOM   2723  CD1 LEU B  29      31.765  41.038  21.370  1.00 13.96    -0.014 C 
ATOM   2724 1HD1 LEU B  29      32.454  40.972  20.496  1.00  0.00     0.000 H 
ATOM   2725 2HD1 LEU B  29      30.922  41.746  21.194  1.00  0.00     0.000 H 
ATOM   2726 3HD1 LEU B  29      31.163  40.110  21.507  1.00  0.00     0.000 H 
ATOM   2727  CD2 LEU B  29      33.128  42.742  22.262  1.00  7.45    -0.014 C 
ATOM   2728 1HD2 LEU B  29      33.817  42.676  21.388  1.00  0.00     0.000 H 
ATOM   2729 2HD2 LEU B  29      33.622  43.217  23.141  1.00  0.00     0.000 H 
ATOM   2730 3HD2 LEU B  29      32.321  43.493  22.096  1.00  0.00     0.000 H 
ATOM   2731  N   ASN B  30      32.966  39.803  26.329  1.00 24.53    -0.520 N 
ATOM   2732  HN  ASN B  30      32.856  38.921  25.828  1.00  0.00     0.248 HD
ATOM   2733  CA  ASN B  30      34.078  39.934  27.288  1.00 25.97     0.217 C 
ATOM   2734  HA  ASN B  30      33.973  40.862  27.897  1.00  0.00     0.000 H 
ATOM   2735  C   ASN B  30      35.275  40.033  26.341  1.00 26.50     0.526 C 
ATOM   2736  O   ASN B  30      35.006  40.183  25.149  1.00 28.86    -0.500 OA
ATOM   2737  CB  ASN B  30      34.240  38.694  28.192  1.00 27.87     0.003 C 
ATOM   2738  HB1 ASN B  30      33.257  38.407  28.633  1.00  0.00     0.000 H 
ATOM   2739  HB2 ASN B  30      34.797  38.963  29.120  1.00  0.00     0.000 H 
ATOM   2740  CG  ASN B  30      34.887  37.491  27.518  1.00 29.44     0.675 C 
ATOM   2741  OD1 ASN B  30      35.951  37.063  27.937  1.00 33.43    -0.470 OA
ATOM   2742  ND2 ASN B  30      34.379  36.915  26.450  1.00 25.84    -0.867 N 
ATOM   2743 1HD2 ASN B  30      33.490  37.273  26.100  1.00  0.00     0.344 HD
ATOM   2744 2HD2 ASN B  30      34.812  36.109  25.999  1.00  0.00     0.344 HD
ATOM   2745  N   ARG B  31      36.570  39.905  26.686  1.00 30.82    -0.520 N 
ATOM   2746  HN  ARG B  31      36.789  39.698  27.661  1.00  0.00     0.248 HD
ATOM   2747  CA  ARG B  31      37.708  40.048  25.724  1.00 32.10     0.237 C 
ATOM   2748  HA  ARG B  31      38.666  39.804  26.239  1.00  0.00     0.000 H 
ATOM   2749  C   ARG B  31      37.724  41.496  25.280  1.00 30.16     0.526 C 
ATOM   2750  O   ARG B  31      38.000  41.866  24.139  1.00 29.87    -0.500 OA
ATOM   2751  CB  ARG B  31      37.571  39.176  24.428  1.00 34.14     0.049 C 
ATOM   2752  HB1 ARG B  31      36.796  39.640  23.774  1.00  0.00     0.000 H 
ATOM   2753  HB2 ARG B  31      37.084  38.212  24.705  1.00  0.00     0.000 H 
ATOM   2754  CG  ARG B  31      38.797  38.866  23.573  1.00 35.05     0.058 C 
ATOM   2755  HG1 ARG B  31      39.331  39.797  23.270  1.00  0.00     0.000 H 
ATOM   2756  HG2 ARG B  31      38.508  38.497  22.561  1.00  0.00     0.000 H 
ATOM   2757  CD  ARG B  31      39.736  37.885  24.281  1.00 39.11     0.111 C 
ATOM   2758  HD1 ARG B  31      40.486  37.460  23.574  1.00  0.00     0.000 H 
ATOM   2759  HD2 ARG B  31      40.430  38.416  24.974  1.00  0.00     0.000 H 
ATOM   2760  NE  ARG B  31      38.996  36.826  24.974  1.00 40.25    -0.493 N 
ATOM   2761  HE  ARG B  31      38.120  36.494  24.570  1.00  0.00     0.294 HD
ATOM   2762  CZ  ARG B  31      39.425  36.281  26.113  1.00 40.81     0.814 C 
ATOM   2763  NH1 ARG B  31      38.635  35.388  26.717  1.00 41.29    -0.634 N 
ATOM   2764 1HH1 ARG B  31      37.721  35.155  26.328  1.00  0.00     0.361 HD
ATOM   2765 2HH1 ARG B  31      38.963  34.971  27.588  1.00  0.00     0.361 HD
ATOM   2766  NH2 ARG B  31      40.628  36.588  26.625  1.00 39.84    -0.634 N 
ATOM   2767 1HH2 ARG B  31      41.231  37.270  26.164  1.00  0.00     0.361 HD
ATOM   2768 2HH2 ARG B  31      40.956  36.171  27.496  1.00  0.00     0.361 HD
ATOM   2769  N   ARG B  32      37.491  42.258  26.338  1.00 29.40    -0.520 N 
ATOM   2770  HN  ARG B  32      37.477  41.789  27.243  1.00  0.00     0.248 HD
ATOM   2771  CA  ARG B  32      37.256  43.674  26.346  1.00 30.33     0.237 C 
ATOM   2772  HA  ARG B  32      37.674  44.150  25.428  1.00  0.00     0.000 H 
ATOM   2773  C   ARG B  32      37.950  44.204  27.592  1.00 30.79     0.526 C 
ATOM   2774  O   ARG B  32      38.175  43.425  28.528  1.00 30.93    -0.500 OA
ATOM   2775  CB  ARG B  32      35.779  43.908  26.441  1.00 30.12     0.049 C 
ATOM   2776  HB1 ARG B  32      35.280  43.044  26.939  1.00  0.00     0.000 H 
ATOM   2777  HB2 ARG B  32      35.559  44.710  27.184  1.00  0.00     0.000 H 
ATOM   2778  CG  ARG B  32      35.122  44.209  25.147  1.00 31.54     0.058 C 
ATOM   2779  HG1 ARG B  32      35.358  43.487  24.331  1.00  0.00     0.000 H 
ATOM   2780  HG2 ARG B  32      34.020  44.039  25.138  1.00  0.00     0.000 H 
ATOM   2781  CD  ARG B  32      35.530  45.608  24.867  1.00 33.91     0.111 C 
ATOM   2782  HD1 ARG B  32      36.574  45.661  24.480  1.00  0.00     0.000 H 
ATOM   2783  HD2 ARG B  32      35.667  46.191  25.808  1.00  0.00     0.000 H 
ATOM   2784  NE  ARG B  32      34.601  46.254  23.974  1.00 37.30    -0.493 N 
ATOM   2785  HE  ARG B  32      34.331  45.817  23.093  1.00  0.00     0.294 HD
ATOM   2786  CZ  ARG B  32      34.101  47.447  24.334  1.00 40.91     0.814 C 
ATOM   2787  NH1 ARG B  32      33.267  48.057  23.502  1.00 41.78    -0.634 N 
ATOM   2788 1HH1 ARG B  32      32.887  48.963  23.775  1.00  0.00     0.361 HD
ATOM   2789 2HH1 ARG B  32      33.053  47.609  22.611  1.00  0.00     0.361 HD
ATOM   2790  NH2 ARG B  32      34.385  48.042  25.516  1.00 39.14    -0.634 N 
ATOM   2791 1HH2 ARG B  32      34.005  48.948  25.789  1.00  0.00     0.361 HD
ATOM   2792 2HH2 ARG B  32      35.026  47.573  26.156  1.00  0.00     0.361 HD
ATOM   2793  N   ALA B  33      38.213  45.514  27.679  1.00 30.69    -0.520 N 
ATOM   2794  HN  ALA B  33      37.865  46.148  26.960  1.00  0.00     0.248 HD
ATOM   2795  CA  ALA B  33      38.993  46.042  28.794  1.00 29.59     0.215 C 
ATOM   2796  HA  ALA B  33      39.970  45.505  28.776  1.00  0.00     0.000 H 
ATOM   2797  C   ALA B  33      38.483  45.956  30.227  1.00 29.25     0.526 C 
ATOM   2798  O   ALA B  33      39.304  46.199  31.109  1.00 30.27    -0.500 OA
ATOM   2799  CB  ALA B  33      39.308  47.497  28.616  1.00 29.76     0.031 C 
ATOM   2800  HB1 ALA B  33      39.681  47.560  27.567  1.00  0.00     0.000 H 
ATOM   2801  HB2 ALA B  33      40.006  47.914  29.379  1.00  0.00     0.000 H 
ATOM   2802  HB3 ALA B  33      38.460  48.183  28.845  1.00  0.00     0.000 H 
ATOM   2803  N   ASN B  34      37.223  45.687  30.561  1.00 24.53    -0.520 N 
ATOM   2804  HN  ASN B  34      36.524  45.553  29.830  1.00  0.00     0.248 HD
ATOM   2805  CA  ASN B  34      36.833  45.582  31.964  1.00 23.70     0.217 C 
ATOM   2806  HA  ASN B  34      37.706  45.225  32.559  1.00  0.00     0.000 H 
ATOM   2807  C   ASN B  34      35.687  44.582  32.112  1.00 22.04     0.526 C 
ATOM   2808  O   ASN B  34      34.694  44.756  32.824  1.00 19.76    -0.500 OA
ATOM   2809  CB  ASN B  34      36.430  46.970  32.454  1.00 26.94     0.003 C 
ATOM   2810  HB1 ASN B  34      35.507  46.916  33.078  1.00  0.00     0.000 H 
ATOM   2811  HB2 ASN B  34      36.048  47.591  31.611  1.00  0.00     0.000 H 
ATOM   2812  CG  ASN B  34      37.539  47.695  33.196  1.00 27.00     0.675 C 
ATOM   2813  OD1 ASN B  34      37.605  47.595  34.421  1.00 32.86    -0.470 OA
ATOM   2814  ND2 ASN B  34      38.470  48.429  32.589  1.00 24.01    -0.867 N 
ATOM   2815 1HD2 ASN B  34      39.215  48.916  33.087  1.00  0.00     0.344 HD
ATOM   2816 2HD2 ASN B  34      38.415  48.512  31.574  1.00  0.00     0.344 HD
ATOM   2817  N   ALA B  35      35.864  43.477  31.381  1.00 20.94    -0.520 N 
ATOM   2818  HN  ALA B  35      36.764  43.345  30.919  1.00  0.00     0.248 HD
ATOM   2819  CA  ALA B  35      34.853  42.457  31.208  1.00 15.76     0.215 C 
ATOM   2820  HA  ALA B  35      33.964  42.664  31.849  1.00  0.00     0.000 H 
ATOM   2821  C   ALA B  35      35.554  41.186  31.647  1.00 17.16     0.526 C 
ATOM   2822  O   ALA B  35      36.627  40.890  31.133  1.00 21.31    -0.500 OA
ATOM   2823  CB  ALA B  35      34.464  42.412  29.737  1.00  6.57     0.031 C 
ATOM   2824  HB1 ALA B  35      33.949  43.347  29.414  1.00  0.00     0.000 H 
ATOM   2825  HB2 ALA B  35      33.849  41.510  29.508  1.00  0.00     0.000 H 
ATOM   2826  HB3 ALA B  35      35.346  42.192  29.091  1.00  0.00     0.000 H 
ATOM   2827  N   LEU B  36      35.002  40.505  32.645  1.00 15.47    -0.520 N 
ATOM   2828  HN  LEU B  36      34.137  40.870  33.044  1.00  0.00     0.248 HD
ATOM   2829  CA  LEU B  36      35.536  39.284  33.208  1.00 14.94     0.204 C 
ATOM   2830  HA  LEU B  36      36.604  39.156  32.913  1.00  0.00     0.000 H 
ATOM   2831  C   LEU B  36      34.705  38.161  32.658  1.00 14.20     0.526 C 
ATOM   2832  O   LEU B  36      33.668  38.422  32.066  1.00 15.01    -0.500 OA
ATOM   2833  CB  LEU B  36      35.395  39.229  34.728  1.00 16.51     0.016 C 
ATOM   2834  HB1 LEU B  36      35.671  38.198  35.052  1.00  0.00     0.000 H 
ATOM   2835  HB2 LEU B  36      34.306  39.270  34.965  1.00  0.00     0.000 H 
ATOM   2836  CG  LEU B  36      36.105  40.210  35.664  1.00 19.39     0.054 C 
ATOM   2837  HG  LEU B  36      36.142  41.202  35.156  1.00  0.00     0.000 H 
ATOM   2838  CD1 LEU B  36      35.197  40.351  36.918  1.00 17.01    -0.014 C 
ATOM   2839 1HD1 LEU B  36      35.714  41.066  37.600  1.00  0.00     0.000 H 
ATOM   2840 2HD1 LEU B  36      34.954  39.376  37.401  1.00  0.00     0.000 H 
ATOM   2841 3HD1 LEU B  36      34.150  40.649  36.676  1.00  0.00     0.000 H 
ATOM   2842  CD2 LEU B  36      37.569  39.760  35.940  1.00 18.86    -0.014 C 
ATOM   2843 1HD2 LEU B  36      38.086  40.475  36.622  1.00  0.00     0.000 H 
ATOM   2844 2HD2 LEU B  36      38.138  39.611  34.993  1.00  0.00     0.000 H 
ATOM   2845 3HD2 LEU B  36      37.611  38.716  36.330  1.00  0.00     0.000 H 
ATOM   2846  N   LEU B  37      35.126  36.935  32.967  1.00 15.97    -0.520 N 
ATOM   2847  HN  LEU B  37      35.972  36.871  33.534  1.00  0.00     0.248 HD
ATOM   2848  CA  LEU B  37      34.497  35.667  32.575  1.00 15.76     0.204 C 
ATOM   2849  HA  LEU B  37      33.500  35.529  33.055  1.00  0.00     0.000 H 
ATOM   2850  C   LEU B  37      35.520  34.689  33.105  1.00 15.40     0.526 C 
ATOM   2851  O   LEU B  37      36.563  34.472  32.479  1.00 21.27    -0.500 OA
ATOM   2852  CB  LEU B  37      34.442  35.446  31.083  1.00 12.51     0.016 C 
ATOM   2853  HB1 LEU B  37      34.667  36.405  30.560  1.00  0.00     0.000 H 
ATOM   2854  HB2 LEU B  37      35.315  34.827  30.769  1.00  0.00     0.000 H 
ATOM   2855  CG  LEU B  37      33.227  34.874  30.536  1.00 11.09     0.054 C 
ATOM   2856  HG  LEU B  37      32.984  33.930  31.078  1.00  0.00     0.000 H 
ATOM   2857  CD1 LEU B  37      32.073  35.869  30.700  1.00 10.07    -0.014 C 
ATOM   2858 1HD1 LEU B  37      31.873  36.098  31.773  1.00  0.00     0.000 H 
ATOM   2859 2HD1 LEU B  37      31.152  35.512  30.183  1.00  0.00     0.000 H 
ATOM   2860 3HD1 LEU B  37      32.253  36.800  30.113  1.00  0.00     0.000 H 
ATOM   2861  CD2 LEU B  37      33.498  34.564  29.083  1.00 11.41    -0.014 C 
ATOM   2862 1HD2 LEU B  37      34.338  33.840  28.964  1.00  0.00     0.000 H 
ATOM   2863 2HD2 LEU B  37      33.678  35.495  28.496  1.00  0.00     0.000 H 
ATOM   2864 3HD2 LEU B  37      32.577  34.207  28.566  1.00  0.00     0.000 H 
ATOM   2865  N   ALA B  38      35.328  34.134  34.276  1.00 12.09    -0.520 N 
ATOM   2866  HN  ALA B  38      34.435  34.258  34.753  1.00  0.00     0.248 HD
ATOM   2867  CA  ALA B  38      36.370  33.348  34.898  1.00 12.61     0.215 C 
ATOM   2868  HA  ALA B  38      37.061  32.958  34.115  1.00  0.00     0.000 H 
ATOM   2869  C   ALA B  38      35.731  32.192  35.628  1.00 14.40     0.526 C 
ATOM   2870  O   ALA B  38      34.524  32.249  35.847  1.00 18.58    -0.500 OA
ATOM   2871  CB  ALA B  38      37.151  34.249  35.872  1.00 13.11     0.031 C 
ATOM   2872  HB1 ALA B  38      37.955  33.643  36.352  1.00  0.00     0.000 H 
ATOM   2873  HB2 ALA B  38      36.488  34.746  36.618  1.00  0.00     0.000 H 
ATOM   2874  HB3 ALA B  38      37.546  35.168  35.380  1.00  0.00     0.000 H 
ATOM   2875  N   ASN B  39      36.459  31.142  36.047  1.00 13.27    -0.520 N 
ATOM   2876  HN  ASN B  39      37.464  31.138  35.874  1.00  0.00     0.248 HD
ATOM   2877  CA  ASN B  39      35.854  30.001  36.746  1.00 10.46     0.217 C 
ATOM   2878  HA  ASN B  39      36.666  29.253  36.903  1.00  0.00     0.000 H 
ATOM   2879  C   ASN B  39      34.677  29.248  36.112  1.00 11.21     0.526 C 
ATOM   2880  O   ASN B  39      33.625  29.035  36.724  1.00 13.75    -0.500 OA
ATOM   2881  CB  ASN B  39      35.408  30.438  38.093  1.00 13.67     0.003 C 
ATOM   2882  HB1 ASN B  39      34.652  31.254  38.021  1.00  0.00     0.000 H 
ATOM   2883  HB2 ASN B  39      34.781  29.656  38.582  1.00  0.00     0.000 H 
ATOM   2884  CG  ASN B  39      36.554  30.839  38.972  1.00 17.59     0.675 C 
ATOM   2885  OD1 ASN B  39      36.781  30.070  39.864  1.00 20.07    -0.470 OA
ATOM   2886  ND2 ASN B  39      37.285  31.938  38.928  1.00 13.00    -0.867 N 
ATOM   2887 1HD2 ASN B  39      38.065  32.211  39.526  1.00  0.00     0.344 HD
ATOM   2888 2HD2 ASN B  39      37.092  32.592  38.169  1.00  0.00     0.344 HD
ATOM   2889  N   GLY B  40      34.864  28.856  34.836  1.00 13.20    -0.520 N 
ATOM   2890  HN  GLY B  40      35.714  29.160  34.361  1.00  0.00     0.248 HD
ATOM   2891  CA  GLY B  40      33.932  28.030  34.099  1.00  7.79     0.246 C 
ATOM   2892  HA1 GLY B  40      33.726  27.101  34.680  1.00  0.00     0.000 H 
ATOM   2893  HA2 GLY B  40      34.444  27.608  33.203  1.00  0.00     0.000 H 
ATOM   2894  C   GLY B  40      32.612  28.658  33.672  1.00  8.14     0.526 C 
ATOM   2895  O   GLY B  40      31.780  27.913  33.125  1.00  9.63    -0.500 OA
ATOM   2896  N   VAL B  41      32.308  29.945  33.931  1.00  6.79    -0.520 N 
ATOM   2897  HN  VAL B  41      32.884  30.523  34.544  1.00  0.00     0.248 HD
ATOM   2898  CA  VAL B  41      31.111  30.463  33.286  1.00  8.12     0.201 C 
ATOM   2899  HA  VAL B  41      30.322  29.675  33.307  1.00  0.00     0.000 H 
ATOM   2900  C   VAL B  41      31.593  30.648  31.829  1.00 12.27     0.526 C 
ATOM   2901  O   VAL B  41      32.808  30.762  31.550  1.00 13.23    -0.500 OA
ATOM   2902  CB  VAL B  41      30.485  31.859  33.900  1.00  6.71     0.033 C 
ATOM   2903  HB  VAL B  41      29.376  31.820  33.792  1.00  0.00     0.000 H 
ATOM   2904  CG1 VAL B  41      30.807  31.947  35.350  1.00  4.74     0.006 C 
ATOM   2905 1HG1 VAL B  41      30.444  31.010  35.832  1.00  0.00     0.000 H 
ATOM   2906 2HG1 VAL B  41      30.401  32.868  35.830  1.00  0.00     0.000 H 
ATOM   2907 3HG1 VAL B  41      31.887  32.145  35.544  1.00  0.00     0.000 H 
ATOM   2908  CG2 VAL B  41      30.970  33.110  33.256  1.00  7.11     0.006 C 
ATOM   2909 1HG2 VAL B  41      30.729  33.044  32.169  1.00  0.00     0.000 H 
ATOM   2910 2HG2 VAL B  41      32.050  33.308  33.450  1.00  0.00     0.000 H 
ATOM   2911 3HG2 VAL B  41      30.564  34.031  33.736  1.00  0.00     0.000 H 
ATOM   2912  N   GLU B  42      30.683  30.521  30.854  1.00 14.73    -0.520 N 
ATOM   2913  HN  GLU B  42      29.729  30.254  31.096  1.00  0.00     0.248 HD
ATOM   2914  CA  GLU B  42      31.020  30.754  29.461  1.00 17.33     0.246 C 
ATOM   2915  HA  GLU B  42      31.819  31.529  29.403  1.00  0.00     0.000 H 
ATOM   2916  C   GLU B  42      29.759  31.291  28.815  1.00 16.22     0.526 C 
ATOM   2917  O   GLU B  42      28.613  30.913  29.094  1.00 18.68    -0.500 OA
ATOM   2918  CB  GLU B  42      31.513  29.451  28.736  1.00 18.17     0.000 C 
ATOM   2919  HB1 GLU B  42      31.875  29.712  27.714  1.00  0.00     0.000 H 
ATOM   2920  HB2 GLU B  42      32.460  29.101  29.210  1.00  0.00     0.000 H 
ATOM   2921  CG  GLU B  42      30.533  28.281  28.641  1.00 25.20    -0.208 C 
ATOM   2922  HG1 GLU B  42      30.024  28.153  29.625  1.00  0.00     0.000 H 
ATOM   2923  HG2 GLU B  42      29.676  28.577  27.993  1.00  0.00     0.000 H 
ATOM   2924  CD  GLU B  42      31.065  26.921  28.174  1.00 28.17     0.620 C 
ATOM   2925  OE1 GLU B  42      30.582  26.381  27.158  1.00 31.60    -0.706 OA
ATOM   2926  OE2 GLU B  42      31.941  26.378  28.857  1.00 28.73    -0.706 OA
ATOM   2927  N   LEU B  43      30.005  32.310  28.027  1.00 16.15    -0.520 N 
ATOM   2928  HN  LEU B  43      30.956  32.673  27.960  1.00  0.00     0.248 HD
ATOM   2929  CA  LEU B  43      28.954  32.927  27.252  1.00 18.19     0.204 C 
ATOM   2930  HA  LEU B  43      27.997  32.916  27.824  1.00  0.00     0.000 H 
ATOM   2931  C   LEU B  43      28.828  32.062  25.992  1.00 18.46     0.526 C 
ATOM   2932  O   LEU B  43      29.764  32.021  25.211  1.00 12.07    -0.500 OA
ATOM   2933  CB  LEU B  43      29.431  34.381  27.040  1.00 18.78     0.016 C 
ATOM   2934  HB1 LEU B  43      28.872  35.011  27.771  1.00  0.00     0.000 H 
ATOM   2935  HB2 LEU B  43      30.479  34.432  27.417  1.00  0.00     0.000 H 
ATOM   2936  CG  LEU B  43      29.408  35.126  25.715  1.00 16.69     0.054 C 
ATOM   2937  HG  LEU B  43      29.664  34.409  24.901  1.00  0.00     0.000 H 
ATOM   2938  CD1 LEU B  43      28.035  35.721  25.423  1.00 15.07    -0.014 C 
ATOM   2939 1HD1 LEU B  43      28.018  36.267  24.451  1.00  0.00     0.000 H 
ATOM   2940 2HD1 LEU B  43      27.688  36.371  26.260  1.00  0.00     0.000 H 
ATOM   2941 3HD1 LEU B  43      27.238  34.942  25.465  1.00  0.00     0.000 H 
ATOM   2942  CD2 LEU B  43      30.522  36.187  25.801  1.00 13.56    -0.014 C 
ATOM   2943 1HD2 LEU B  43      30.505  36.733  24.829  1.00  0.00     0.000 H 
ATOM   2944 2HD2 LEU B  43      31.521  35.762  26.054  1.00  0.00     0.000 H 
ATOM   2945 3HD2 LEU B  43      30.430  36.856  26.688  1.00  0.00     0.000 H 
ATOM   2946  N   ARG B  44      27.777  31.252  25.836  1.00 25.10    -0.520 N 
ATOM   2947  HN  ARG B  44      27.044  31.217  26.544  1.00  0.00     0.248 HD
ATOM   2948  CA  ARG B  44      27.689  30.423  24.648  1.00 31.63     0.237 C 
ATOM   2949  HA  ARG B  44      28.707  30.347  24.199  1.00  0.00     0.000 H 
ATOM   2950  C   ARG B  44      26.765  31.065  23.625  1.00 33.68     0.526 C 
ATOM   2951  O   ARG B  44      27.277  31.920  22.885  1.00 36.91    -0.500 OA
ATOM   2952  CB  ARG B  44      27.187  28.997  24.950  1.00 37.63     0.049 C 
ATOM   2953  HB1 ARG B  44      26.935  28.913  26.033  1.00  0.00     0.000 H 
ATOM   2954  HB2 ARG B  44      26.181  28.852  24.492  1.00  0.00     0.000 H 
ATOM   2955  CG  ARG B  44      28.119  27.816  24.540  1.00 45.33     0.058 C 
ATOM   2956  HG1 ARG B  44      29.095  27.945  25.063  1.00  0.00     0.000 H 
ATOM   2957  HG2 ARG B  44      27.730  26.884  25.013  1.00  0.00     0.000 H 
ATOM   2958  CD  ARG B  44      28.411  27.512  23.017  1.00 53.94     0.111 C 
ATOM   2959  HD1 ARG B  44      27.463  27.385  22.445  1.00  0.00     0.000 H 
ATOM   2960  HD2 ARG B  44      28.814  28.413  22.499  1.00  0.00     0.000 H 
ATOM   2961  NE  ARG B  44      29.315  26.333  22.829  1.00 60.47    -0.493 N 
ATOM   2962  HE  ARG B  44      29.204  25.562  23.488  1.00  0.00     0.294 HD
ATOM   2963  CZ  ARG B  44      30.276  26.183  21.863  1.00 61.27     0.814 C 
ATOM   2964  NH1 ARG B  44      31.057  25.086  21.826  1.00 59.75    -0.634 N 
ATOM   2965 1HH1 ARG B  44      31.772  24.974  21.107  1.00  0.00     0.361 HD
ATOM   2966 2HH1 ARG B  44      30.894  24.384  22.548  1.00  0.00     0.361 HD
ATOM   2967  NH2 ARG B  44      30.491  27.107  20.912  1.00 63.57    -0.634 N 
ATOM   2968 1HH2 ARG B  44      31.206  26.995  20.193  1.00  0.00     0.361 HD
ATOM   2969 2HH2 ARG B  44      29.900  27.938  20.940  1.00  0.00     0.361 HD
ATOM   2970  N   ASP B  45      25.438  30.876  23.482  1.00 30.35    -0.520 N 
ATOM   2971  HN  ASP B  45      24.893  30.348  24.164  1.00  0.00     0.248 HD
ATOM   2972  CA  ASP B  45      24.820  31.474  22.287  1.00 28.30     0.246 C 
ATOM   2973  HA  ASP B  45      25.611  31.562  21.506  1.00  0.00     0.000 H 
ATOM   2974  C   ASP B  45      24.245  32.854  22.515  1.00 24.43     0.526 C 
ATOM   2975  O   ASP B  45      23.099  33.147  22.207  1.00 23.66    -0.500 OA
ATOM   2976  CB  ASP B  45      23.780  30.478  21.781  1.00 32.66    -0.208 C 
ATOM   2977  HB1 ASP B  45      22.916  30.380  22.479  1.00  0.00     0.000 H 
ATOM   2978  HB2 ASP B  45      23.225  30.862  20.894  1.00  0.00     0.000 H 
ATOM   2979  CG  ASP B  45      24.459  29.127  21.502  1.00 34.80     0.620 C 
ATOM   2980  OD1 ASP B  45      25.612  29.116  21.020  1.00 31.68    -0.706 OA
ATOM   2981  OD2 ASP B  45      23.828  28.099  21.804  1.00 34.92    -0.706 OA
ATOM   2982  N   ASN B  46      25.173  33.693  23.008  1.00 19.59    -0.520 N 
ATOM   2983  HN  ASN B  46      26.140  33.371  22.965  1.00  0.00     0.248 HD
ATOM   2984  CA  ASN B  46      24.959  35.007  23.595  1.00 15.34     0.217 C 
ATOM   2985  HA  ASN B  46      25.944  35.529  23.625  1.00  0.00     0.000 H 
ATOM   2986  C   ASN B  46      24.386  34.997  25.038  1.00 18.65     0.526 C 
ATOM   2987  O   ASN B  46      24.011  36.027  25.626  1.00 20.16    -0.500 OA
ATOM   2988  CB  ASN B  46      24.049  35.800  22.704  1.00 11.21     0.003 C 
ATOM   2989  HB1 ASN B  46      24.095  35.441  21.649  1.00  0.00     0.000 H 
ATOM   2990  HB2 ASN B  46      22.977  35.579  22.914  1.00  0.00     0.000 H 
ATOM   2991  CG  ASN B  46      24.334  37.260  22.797  1.00  5.90     0.675 C 
ATOM   2992  OD1 ASN B  46      25.468  37.716  22.910  1.00  7.24    -0.470 OA
ATOM   2993  ND2 ASN B  46      23.237  37.952  22.696  1.00  2.00    -0.867 N 
ATOM   2994 1HD2 ASN B  46      23.432  38.951  22.760  1.00  0.00     0.344 HD
ATOM   2995 2HD2 ASN B  46      22.295  37.573  22.602  1.00  0.00     0.344 HD
ATOM   2996  N   GLN B  47      24.365  33.804  25.667  1.00 17.97    -0.520 N 
ATOM   2997  HN  GLN B  47      24.778  33.003  25.190  1.00  0.00     0.248 HD
ATOM   2998  CA  GLN B  47      23.784  33.592  26.993  1.00 15.89     0.210 C 
ATOM   2999  HA  GLN B  47      23.310  34.533  27.358  1.00  0.00     0.000 H 
ATOM   3000  C   GLN B  47      24.887  33.176  27.922  1.00 14.78     0.526 C 
ATOM   3001  O   GLN B  47      25.962  32.791  27.444  1.00 15.12    -0.500 OA
ATOM   3002  CB  GLN B  47      22.772  32.470  26.988  1.00 17.71     0.053 C 
ATOM   3003  HB1 GLN B  47      23.209  31.499  26.657  1.00  0.00     0.000 H 
ATOM   3004  HB2 GLN B  47      22.471  32.158  28.015  1.00  0.00     0.000 H 
ATOM   3005  CG  GLN B  47      21.600  32.895  26.145  1.00 19.80    -0.043 C 
ATOM   3006  HG1 GLN B  47      21.027  33.692  26.674  1.00  0.00     0.000 H 
ATOM   3007  HG2 GLN B  47      21.964  33.461  25.256  1.00  0.00     0.000 H 
ATOM   3008  CD  GLN B  47      20.653  31.799  25.698  1.00 19.26     0.675 C 
ATOM   3009  OE1 GLN B  47      20.997  30.635  25.555  1.00 18.69    -0.470 OA
ATOM   3010  NE2 GLN B  47      19.425  32.179  25.418  1.00 21.02    -0.867 N 
ATOM   3011 1HE2 GLN B  47      19.138  33.150  25.537  1.00  0.00     0.344 HD
ATOM   3012 2HE2 GLN B  47      18.788  31.442  25.117  1.00  0.00     0.344 HD
ATOM   3013  N   LEU B  48      24.601  33.199  29.223  1.00 13.73    -0.520 N 
ATOM   3014  HN  LEU B  48      23.674  33.488  29.535  1.00  0.00     0.248 HD
ATOM   3015  CA  LEU B  48      25.593  32.818  30.187  1.00 12.31     0.204 C 
ATOM   3016  HA  LEU B  48      26.585  32.769  29.680  1.00  0.00     0.000 H 
ATOM   3017  C   LEU B  48      25.275  31.470  30.751  1.00 14.33     0.526 C 
ATOM   3018  O   LEU B  48      24.156  31.321  31.214  1.00 10.95    -0.500 OA
ATOM   3019  CB  LEU B  48      25.667  33.827  31.290  1.00 12.46     0.016 C 
ATOM   3020  HB1 LEU B  48      26.130  33.381  32.201  1.00  0.00     0.000 H 
ATOM   3021  HB2 LEU B  48      24.650  34.050  31.688  1.00  0.00     0.000 H 
ATOM   3022  CG  LEU B  48      26.398  35.137  30.888  1.00 18.62     0.054 C 
ATOM   3023  HG  LEU B  48      25.918  35.526  29.960  1.00  0.00     0.000 H 
ATOM   3024  CD1 LEU B  48      26.194  36.186  32.004  1.00 18.71    -0.014 C 
ATOM   3025 1HD1 LEU B  48      26.719  37.126  31.715  1.00  0.00     0.000 H 
ATOM   3026 2HD1 LEU B  48      26.513  35.811  33.004  1.00  0.00     0.000 H 
ATOM   3027 3HD1 LEU B  48      25.117  36.354  32.238  1.00  0.00     0.000 H 
ATOM   3028  CD2 LEU B  48      27.884  34.854  30.571  1.00 15.01    -0.014 C 
ATOM   3029 1HD2 LEU B  48      28.409  35.794  30.282  1.00  0.00     0.000 H 
ATOM   3030 2HD2 LEU B  48      27.998  34.061  29.795  1.00  0.00     0.000 H 
ATOM   3031 3HD2 LEU B  48      28.396  34.336  31.415  1.00  0.00     0.000 H 
ATOM   3032  N   VAL B  49      26.224  30.509  30.618  1.00 16.55    -0.520 N 
ATOM   3033  HN  VAL B  49      27.072  30.735  30.098  1.00  0.00     0.248 HD
ATOM   3034  CA  VAL B  49      26.093  29.159  31.185  1.00 16.23     0.201 C 
ATOM   3035  HA  VAL B  49      25.006  28.918  31.249  1.00  0.00     0.000 H 
ATOM   3036  C   VAL B  49      26.685  29.046  32.596  1.00 15.24     0.526 C 
ATOM   3037  O   VAL B  49      27.844  29.393  32.851  1.00 16.28    -0.500 OA
ATOM   3038  CB  VAL B  49      26.762  28.099  30.275  1.00 16.73     0.033 C 
ATOM   3039  HB  VAL B  49      27.868  28.202  30.366  1.00  0.00     0.000 H 
ATOM   3040  CG1 VAL B  49      26.357  26.722  30.807  1.00 17.92     0.006 C 
ATOM   3041 1HG1 VAL B  49      26.640  26.573  31.875  1.00  0.00     0.000 H 
ATOM   3042 2HG1 VAL B  49      26.771  25.908  30.167  1.00  0.00     0.000 H 
ATOM   3043 3HG1 VAL B  49      25.268  26.538  30.652  1.00  0.00     0.000 H 
ATOM   3044  CG2 VAL B  49      26.378  28.301  28.825  1.00 11.34     0.006 C 
ATOM   3045 1HG2 VAL B  49      26.673  29.304  28.437  1.00  0.00     0.000 H 
ATOM   3046 2HG2 VAL B  49      25.289  28.117  28.670  1.00  0.00     0.000 H 
ATOM   3047 3HG2 VAL B  49      26.792  27.487  28.185  1.00  0.00     0.000 H 
ATOM   3048  N   VAL B  50      25.870  28.592  33.533  1.00 16.62    -0.520 N 
ATOM   3049  HN  VAL B  50      24.934  28.280  33.273  1.00  0.00     0.248 HD
ATOM   3050  CA  VAL B  50      26.280  28.528  34.923  1.00 22.36     0.201 C 
ATOM   3051  HA  VAL B  50      26.976  29.381  35.102  1.00  0.00     0.000 H 
ATOM   3052  C   VAL B  50      27.010  27.253  35.340  1.00 24.15     0.526 C 
ATOM   3053  O   VAL B  50      26.436  26.157  35.254  1.00 23.60    -0.500 OA
ATOM   3054  CB  VAL B  50      25.038  28.759  35.804  1.00 22.48     0.033 C 
ATOM   3055  HB  VAL B  50      24.121  28.495  35.228  1.00  0.00     0.000 H 
ATOM   3056  CG1 VAL B  50      25.031  28.016  37.141  1.00 25.05     0.006 C 
ATOM   3057 1HG1 VAL B  50      24.132  28.183  37.779  1.00  0.00     0.000 H 
ATOM   3058 2HG1 VAL B  50      25.956  28.256  37.715  1.00  0.00     0.000 H 
ATOM   3059 3HG1 VAL B  50      25.181  26.924  36.972  1.00  0.00     0.000 H 
ATOM   3060  CG2 VAL B  50      25.053  30.252  36.071  1.00 25.88     0.006 C 
ATOM   3061 1HG2 VAL B  50      24.154  30.419  36.709  1.00  0.00     0.000 H 
ATOM   3062 2HG2 VAL B  50      25.088  30.882  35.152  1.00  0.00     0.000 H 
ATOM   3063 3HG2 VAL B  50      26.005  30.630  36.511  1.00  0.00     0.000 H 
ATOM   3064  N   PRO B  51      28.242  27.427  35.859  1.00 23.77    -0.257 N 
ATOM   3065  CA  PRO B  51      29.176  26.349  36.094  1.00 22.62     0.112 C 
ATOM   3066  HA  PRO B  51      29.255  25.730  35.170  1.00  0.00     0.000 H 
ATOM   3067  C   PRO B  51      28.727  25.462  37.248  1.00 26.06     0.526 C 
ATOM   3068  O   PRO B  51      28.442  24.294  36.982  1.00 28.52    -0.500 OA
ATOM   3069  CB  PRO B  51      30.479  27.082  36.306  1.00 23.02    -0.001 C 
ATOM   3070  HB1 PRO B  51      31.076  27.234  35.377  1.00  0.00     0.000 H 
ATOM   3071  HB2 PRO B  51      31.253  26.493  36.851  1.00  0.00     0.000 H 
ATOM   3072  CG  PRO B  51      30.071  28.358  36.996  1.00 23.72     0.036 C 
ATOM   3073  HG1 PRO B  51      29.957  28.282  38.103  1.00  0.00     0.000 H 
ATOM   3074  HG2 PRO B  51      30.854  29.151  37.026  1.00  0.00     0.000 H 
ATOM   3075  CD  PRO B  51      28.810  28.729  36.244  1.00 23.66     0.084 C 
ATOM   3076  HD1 PRO B  51      28.112  29.388  36.811  1.00  0.00     0.000 H 
ATOM   3077  HD2 PRO B  51      28.970  29.432  35.394  1.00  0.00     0.000 H 
ATOM   3078  N   SER B  52      28.585  25.952  38.494  1.00 26.69    -0.520 N 
ATOM   3079  HN  SER B  52      28.742  26.950  38.631  1.00  0.00     0.248 HD
ATOM   3080  CA  SER B  52      28.221  25.155  39.667  1.00 23.81     0.292 C 
ATOM   3081  HA  SER B  52      28.150  24.084  39.364  1.00  0.00     0.000 H 
ATOM   3082  C   SER B  52      26.910  25.568  40.307  1.00 20.50     0.526 C 
ATOM   3083  O   SER B  52      26.431  26.681  40.071  1.00 17.64    -0.500 OA
ATOM   3084  CB  SER B  52      29.314  25.295  40.705  1.00 26.40     0.194 C 
ATOM   3085  HB1 SER B  52      29.060  24.737  41.636  1.00  0.00     0.000 H 
ATOM   3086  HB2 SER B  52      30.229  24.733  40.406  1.00  0.00     0.000 H 
ATOM   3087  OG  SER B  52      29.615  26.660  40.987  1.00 27.61    -0.550 OA
ATOM   3088  HG  SER B  52      30.301  26.748  41.638  1.00  0.00     0.310 HD
ATOM   3089  N   GLU B  53      26.358  24.726  41.178  1.00 17.57    -0.520 N 
ATOM   3090  HN  GLU B  53      26.784  23.819  41.370  1.00  0.00     0.248 HD
ATOM   3091  CA  GLU B  53      25.137  25.129  41.846  1.00 22.06     0.246 C 
ATOM   3092  HA  GLU B  53      24.433  25.590  41.115  1.00  0.00     0.000 H 
ATOM   3093  C   GLU B  53      25.582  26.160  42.868  1.00 20.65     0.526 C 
ATOM   3094  O   GLU B  53      26.640  25.959  43.478  1.00 26.44    -0.500 OA
ATOM   3095  CB  GLU B  53      24.466  23.953  42.556  1.00 26.74     0.000 C 
ATOM   3096  HB1 GLU B  53      25.067  23.027  42.397  1.00  0.00     0.000 H 
ATOM   3097  HB2 GLU B  53      24.567  24.074  43.660  1.00  0.00     0.000 H 
ATOM   3098  CG  GLU B  53      22.980  23.680  42.195  1.00 31.48    -0.208 C 
ATOM   3099  HG1 GLU B  53      22.430  24.637  42.041  1.00  0.00     0.000 H 
ATOM   3100  HG2 GLU B  53      22.896  23.251  41.169  1.00  0.00     0.000 H 
ATOM   3101  CD  GLU B  53      22.246  22.786  43.224  1.00 35.83     0.620 C 
ATOM   3102  OE1 GLU B  53      21.677  23.364  44.172  1.00 37.57    -0.706 OA
ATOM   3103  OE2 GLU B  53      22.238  21.539  43.090  1.00 33.75    -0.706 OA
ATOM   3104  N   GLY B  54      24.835  27.250  43.031  1.00 17.97    -0.520 N 
ATOM   3105  HN  GLY B  54      23.975  27.344  42.491  1.00  0.00     0.248 HD
ATOM   3106  CA  GLY B  54      25.202  28.305  43.948  1.00 15.63     0.246 C 
ATOM   3107  HA1 GLY B  54      26.185  28.762  43.688  1.00  0.00     0.000 H 
ATOM   3108  HA2 GLY B  54      25.469  27.909  44.956  1.00  0.00     0.000 H 
ATOM   3109  C   GLY B  54      24.098  29.335  44.017  1.00 17.64     0.526 C 
ATOM   3110  O   GLY B  54      23.001  29.208  43.426  1.00 20.48    -0.500 OA
ATOM   3111  N   LEU B  55      24.372  30.401  44.724  1.00 15.60    -0.520 N 
ATOM   3112  HN  LEU B  55      25.278  30.510  45.179  1.00  0.00     0.248 HD
ATOM   3113  CA  LEU B  55      23.351  31.422  44.842  1.00 16.80     0.204 C 
ATOM   3114  HA  LEU B  55      22.397  31.099  44.364  1.00  0.00     0.000 H 
ATOM   3115  C   LEU B  55      24.015  32.538  44.052  1.00 13.18     0.526 C 
ATOM   3116  O   LEU B  55      25.198  32.758  44.170  1.00 11.90    -0.500 OA
ATOM   3117  CB  LEU B  55      23.177  31.626  46.369  1.00 17.29     0.016 C 
ATOM   3118  HB1 LEU B  55      23.837  32.472  46.673  1.00  0.00     0.000 H 
ATOM   3119  HB2 LEU B  55      23.654  30.758  46.881  1.00  0.00     0.000 H 
ATOM   3120  CG  LEU B  55      21.798  31.852  47.022  1.00 18.42     0.054 C 
ATOM   3121  HG  LEU B  55      21.625  32.950  47.109  1.00  0.00     0.000 H 
ATOM   3122  CD1 LEU B  55      20.714  31.272  46.208  1.00 15.23    -0.014 C 
ATOM   3123 1HD1 LEU B  55      19.717  31.435  46.680  1.00  0.00     0.000 H 
ATOM   3124 2HD1 LEU B  55      20.894  30.192  45.998  1.00  0.00     0.000 H 
ATOM   3125 3HD1 LEU B  55      20.738  31.657  45.162  1.00  0.00     0.000 H 
ATOM   3126  CD2 LEU B  55      21.811  31.250  48.433  1.00 18.81    -0.014 C 
ATOM   3127 1HD2 LEU B  55      20.814  31.413  48.905  1.00  0.00     0.000 H 
ATOM   3128 2HD2 LEU B  55      22.647  31.646  49.056  1.00  0.00     0.000 H 
ATOM   3129 3HD2 LEU B  55      22.111  30.176  48.434  1.00  0.00     0.000 H 
ATOM   3130  N   TYR B  56      23.413  33.218  43.111  1.00 13.24    -0.520 N 
ATOM   3131  HN  TYR B  56      22.416  33.076  42.950  1.00  0.00     0.248 HD
ATOM   3132  CA  TYR B  56      24.137  34.168  42.294  1.00 11.89     0.245 C 
ATOM   3133  HA  TYR B  56      25.156  34.318  42.721  1.00  0.00     0.000 H 
ATOM   3134  C   TYR B  56      23.395  35.507  42.277  1.00 12.07     0.526 C 
ATOM   3135  O   TYR B  56      22.157  35.571  42.265  1.00 12.96    -0.500 OA
ATOM   3136  CB  TYR B  56      24.263  33.650  40.853  1.00 10.09     0.022 C 
ATOM   3137  HB  TYR B  56      23.690  34.161  40.061  1.00  0.00     0.000 H 
ATOM   3138  CG  TYR B  56      25.143  32.462  40.461  1.00 10.19    -0.001 A 
ATOM   3139  CD1 TYR B  56      24.678  31.166  40.564  1.00 11.05    -0.035 A 
ATOM   3140  HD1 TYR B  56      23.682  30.981  41.001  1.00  0.00     0.000 H 
ATOM   3141  CD2 TYR B  56      26.403  32.656  39.915  1.00 11.75    -0.035 A 
ATOM   3142  HD2 TYR B  56      26.802  33.680  39.823  1.00  0.00     0.000 H 
ATOM   3143  CE1 TYR B  56      25.445  30.086  40.125  1.00 10.61     0.100 A 
ATOM   3144  HE1 TYR B  56      25.050  29.060  40.211  1.00  0.00     0.000 H 
ATOM   3145  CE2 TYR B  56      27.170  31.584  39.483  1.00 10.02     0.100 A 
ATOM   3146  HE2 TYR B  56      28.170  31.762  39.054  1.00  0.00     0.000 H 
ATOM   3147  CZ  TYR B  56      26.688  30.298  39.587  1.00  9.72    -0.121 A 
ATOM   3148  OH  TYR B  56      27.413  29.207  39.156  1.00  9.95    -0.368 OA
ATOM   3149  HH  TYR B  56      27.081  28.320  39.228  1.00  0.00     0.339 HD
ATOM   3150  N   LEU B  57      24.191  36.577  42.376  1.00 11.20    -0.520 N 
ATOM   3151  HN  LEU B  57      25.170  36.433  42.625  1.00  0.00     0.248 HD
ATOM   3152  CA  LEU B  57      23.732  37.925  42.148  1.00 12.85     0.204 C 
ATOM   3153  HA  LEU B  57      22.681  38.055  42.497  1.00  0.00     0.000 H 
ATOM   3154  C   LEU B  57      23.820  38.018  40.632  1.00 14.38     0.526 C 
ATOM   3155  O   LEU B  57      24.903  37.811  40.062  1.00 14.95    -0.500 OA
ATOM   3156  CB  LEU B  57      24.676  38.993  42.797  1.00 11.78     0.016 C 
ATOM   3157  HB1 LEU B  57      25.700  38.554  42.845  1.00  0.00     0.000 H 
ATOM   3158  HB2 LEU B  57      24.404  39.074  43.875  1.00  0.00     0.000 H 
ATOM   3159  CG  LEU B  57      24.810  40.460  42.226  1.00  7.67     0.054 C 
ATOM   3160  HG  LEU B  57      25.172  40.402  41.173  1.00  0.00     0.000 H 
ATOM   3161  CD1 LEU B  57      23.475  41.193  42.244  1.00  9.70    -0.014 C 
ATOM   3162 1HD1 LEU B  57      23.570  42.228  41.841  1.00  0.00     0.000 H 
ATOM   3163 2HD1 LEU B  57      23.024  41.193  43.264  1.00  0.00     0.000 H 
ATOM   3164 3HD1 LEU B  57      22.687  40.617  41.705  1.00  0.00     0.000 H 
ATOM   3165  CD2 LEU B  57      25.812  41.219  43.036  1.00  2.00    -0.014 C 
ATOM   3166 1HD2 LEU B  57      25.907  42.254  42.633  1.00  0.00     0.000 H 
ATOM   3167 2HD2 LEU B  57      26.795  40.696  43.089  1.00  0.00     0.000 H 
ATOM   3168 3HD2 LEU B  57      25.568  41.210  44.124  1.00  0.00     0.000 H 
ATOM   3169  N   ILE B  58      22.685  38.263  39.979  1.00 18.67    -0.520 N 
ATOM   3170  HN  ILE B  58      21.818  38.298  40.514  1.00  0.00     0.248 HD
ATOM   3171  CA  ILE B  58      22.616  38.488  38.509  1.00 15.27     0.199 C 
ATOM   3172  HA  ILE B  58      23.617  38.311  38.052  1.00  0.00     0.000 H 
ATOM   3173  C   ILE B  58      22.190  39.952  38.285  1.00 15.33     0.526 C 
ATOM   3174  O   ILE B  58      21.124  40.331  38.779  1.00 18.41    -0.500 OA
ATOM   3175  CB  ILE B  58      21.586  37.602  37.847  1.00  8.56     0.030 C 
ATOM   3176  HB  ILE B  58      20.577  37.997  38.109  1.00  0.00     0.000 H 
ATOM   3177  CG1 ILE B  58      21.660  36.136  38.331  1.00  7.45     0.017 C 
ATOM   3178 1HG1 ILE B  58      22.536  35.640  37.852  1.00  0.00     0.000 H 
ATOM   3179 2HG1 ILE B  58      21.966  36.123  39.403  1.00  0.00     0.000 H 
ATOM   3180  CG2 ILE B  58      21.805  37.836  36.367  1.00  9.20     0.001 C 
ATOM   3181 1HG2 ILE B  58      21.752  38.894  36.018  1.00  0.00     0.000 H 
ATOM   3182 2HG2 ILE B  58      21.094  37.210  35.779  1.00  0.00     0.000 H 
ATOM   3183 3HG2 ILE B  58      22.777  37.387  36.056  1.00  0.00     0.000 H 
ATOM   3184  CD1 ILE B  58      20.427  35.247  38.155  1.00  3.27    -0.001 C 
ATOM   3185 1HD1 ILE B  58      20.480  34.189  38.504  1.00  0.00     0.000 H 
ATOM   3186 2HD1 ILE B  58      20.121  35.260  37.083  1.00  0.00     0.000 H 
ATOM   3187 3HD1 ILE B  58      19.551  35.743  38.634  1.00  0.00     0.000 H 
ATOM   3188  N   TYR B  59      22.961  40.801  37.605  1.00 12.59    -0.520 N 
ATOM   3189  HN  TYR B  59      23.844  40.471  37.216  1.00  0.00     0.248 HD
ATOM   3190  CA  TYR B  59      22.571  42.181  37.407  1.00  9.72     0.245 C 
ATOM   3191  HA  TYR B  59      21.522  42.299  37.765  1.00  0.00     0.000 H 
ATOM   3192  C   TYR B  59      22.623  42.609  35.924  1.00  8.31     0.526 C 
ATOM   3193  O   TYR B  59      23.167  41.853  35.110  1.00  7.16    -0.500 OA
ATOM   3194  CB  TYR B  59      23.480  43.016  38.316  1.00  6.20     0.022 C 
ATOM   3195  HB1 TYR B  59      23.305  42.738  39.381  1.00  0.00     0.000 H 
ATOM   3196  HB2 TYR B  59      23.134  44.076  38.324  1.00  0.00     0.000 H 
ATOM   3197  CG  TYR B  59      24.962  42.965  38.012  1.00  4.91    -0.001 A 
ATOM   3198  CD1 TYR B  59      25.499  43.941  37.214  1.00  2.87    -0.035 A 
ATOM   3199  HD1 TYR B  59      24.861  44.755  36.831  1.00  0.00     0.000 H 
ATOM   3200  CD2 TYR B  59      25.753  41.956  38.505  1.00  6.21    -0.035 A 
ATOM   3201  HD2 TYR B  59      25.313  41.175  39.148  1.00  0.00     0.000 H 
ATOM   3202  CE1 TYR B  59      26.811  43.904  36.897  1.00  5.74     0.100 A 
ATOM   3203  HE1 TYR B  59      27.246  44.681  36.246  1.00  0.00     0.000 H 
ATOM   3204  CE2 TYR B  59      27.089  41.919  38.198  1.00  3.69     0.100 A 
ATOM   3205  HE2 TYR B  59      27.736  41.119  38.596  1.00  0.00     0.000 H 
ATOM   3206  CZ  TYR B  59      27.603  42.893  37.389  1.00  7.64    -0.121 A 
ATOM   3207  OH  TYR B  59      28.941  42.845  36.995  1.00 10.96    -0.368 OA
ATOM   3208  HH  TYR B  59      29.298  43.522  36.433  1.00  0.00     0.339 HD
ATOM   3209  N   SER B  60      22.138  43.785  35.504  1.00  6.60    -0.520 N 
ATOM   3210  HN  SER B  60      21.802  44.452  36.199  1.00  0.00     0.248 HD
ATOM   3211  CA  SER B  60      22.071  44.150  34.095  1.00  6.38     0.292 C 
ATOM   3212  HA  SER B  60      23.070  43.969  33.634  1.00  0.00     0.000 H 
ATOM   3213  C   SER B  60      21.675  45.604  33.840  1.00  9.36     0.526 C 
ATOM   3214  O   SER B  60      20.647  46.082  34.372  1.00  6.50    -0.500 OA
ATOM   3215  CB  SER B  60      21.051  43.236  33.416  1.00  9.01     0.194 C 
ATOM   3216  HB1 SER B  60      21.119  42.221  33.872  1.00  0.00     0.000 H 
ATOM   3217  HB2 SER B  60      20.027  43.547  33.729  1.00  0.00     0.000 H 
ATOM   3218  OG  SER B  60      21.077  43.105  32.007  1.00 15.57    -0.550 OA
ATOM   3219  HG  SER B  60      20.443  42.537  31.585  1.00  0.00     0.310 HD
ATOM   3220  N   GLN B  61      22.440  46.313  32.982  1.00 10.35    -0.520 N 
ATOM   3221  HN  GLN B  61      23.307  45.911  32.625  1.00  0.00     0.248 HD
ATOM   3222  CA  GLN B  61      22.032  47.655  32.562  1.00 11.05     0.210 C 
ATOM   3223  HA  GLN B  61      20.960  47.800  32.833  1.00  0.00     0.000 H 
ATOM   3224  C   GLN B  61      22.178  47.822  31.051  1.00 13.53     0.526 C 
ATOM   3225  O   GLN B  61      23.116  47.318  30.435  1.00 11.61    -0.500 OA
ATOM   3226  CB  GLN B  61      22.856  48.739  33.248  1.00  9.86     0.053 C 
ATOM   3227  HB1 GLN B  61      23.939  48.511  33.114  1.00  0.00     0.000 H 
ATOM   3228  HB2 GLN B  61      22.750  48.632  34.353  1.00  0.00     0.000 H 
ATOM   3229  CG  GLN B  61      22.600  50.204  32.860  1.00 11.46    -0.043 C 
ATOM   3230  HG1 GLN B  61      22.577  50.323  31.752  1.00  0.00     0.000 H 
ATOM   3231  HG2 GLN B  61      21.552  50.501  33.098  1.00  0.00     0.000 H 
ATOM   3232  CD  GLN B  61      23.593  51.171  33.489  1.00 14.58     0.675 C 
ATOM   3233  OE1 GLN B  61      24.753  51.337  33.102  1.00 14.11    -0.470 OA
ATOM   3234  NE2 GLN B  61      23.214  51.785  34.589  1.00 17.69    -0.867 N 
ATOM   3235 1HE2 GLN B  61      23.879  52.433  35.011  1.00  0.00     0.344 HD
ATOM   3236 2HE2 GLN B  61      22.255  51.648  34.909  1.00  0.00     0.344 HD
ATOM   3237  N   VAL B  62      21.157  48.516  30.517  1.00 13.26    -0.520 N 
ATOM   3238  HN  VAL B  62      20.416  48.791  31.162  1.00  0.00     0.248 HD
ATOM   3239  CA  VAL B  62      20.981  48.923  29.129  1.00  7.63     0.201 C 
ATOM   3240  HA  VAL B  62      21.957  48.833  28.598  1.00  0.00     0.000 H 
ATOM   3241  C   VAL B  62      20.526  50.379  29.090  1.00 10.24     0.526 C 
ATOM   3242  O   VAL B  62      19.734  50.841  29.928  1.00 11.35    -0.500 OA
ATOM   3243  CB  VAL B  62      19.925  48.087  28.383  1.00  7.20     0.033 C 
ATOM   3244  HB  VAL B  62      19.771  48.544  27.378  1.00  0.00     0.000 H 
ATOM   3245  CG1 VAL B  62      20.477  46.670  28.180  1.00  8.40     0.006 C 
ATOM   3246 1HG1 VAL B  62      19.712  46.065  27.640  1.00  0.00     0.000 H 
ATOM   3247 2HG1 VAL B  62      20.800  46.196  29.136  1.00  0.00     0.000 H 
ATOM   3248 3HG1 VAL B  62      21.466  46.666  27.666  1.00  0.00     0.000 H 
ATOM   3249  CG2 VAL B  62      18.601  48.106  29.112  1.00  4.13     0.006 C 
ATOM   3250 1HG2 VAL B  62      17.836  47.501  28.572  1.00  0.00     0.000 H 
ATOM   3251 2HG2 VAL B  62      18.247  49.148  29.293  1.00  0.00     0.000 H 
ATOM   3252 3HG2 VAL B  62      18.711  47.777  30.172  1.00  0.00     0.000 H 
ATOM   3253  N   LEU B  63      21.188  51.129  28.213  1.00 11.49    -0.520 N 
ATOM   3254  HN  LEU B  63      21.965  50.698  27.712  1.00  0.00     0.248 HD
ATOM   3255  CA  LEU B  63      20.884  52.508  27.921  1.00  9.94     0.204 C 
ATOM   3256  HA  LEU B  63      20.192  52.916  28.694  1.00  0.00     0.000 H 
ATOM   3257  C   LEU B  63      20.188  52.498  26.549  1.00 12.91     0.526 C 
ATOM   3258  O   LEU B  63      20.480  51.707  25.629  1.00 14.54    -0.500 OA
ATOM   3259  CB  LEU B  63      22.173  53.358  27.867  1.00  6.09     0.016 C 
ATOM   3260  HB1 LEU B  63      23.048  52.709  28.106  1.00  0.00     0.000 H 
ATOM   3261  HB2 LEU B  63      22.390  53.625  26.806  1.00  0.00     0.000 H 
ATOM   3262  CG  LEU B  63      22.241  54.669  28.756  1.00  8.11     0.054 C 
ATOM   3263  HG  LEU B  63      22.493  54.394  29.807  1.00  0.00     0.000 H 
ATOM   3264  CD1 LEU B  63      23.265  55.655  28.232  1.00  2.13    -0.014 C 
ATOM   3265 1HD1 LEU B  63      23.313  56.577  28.857  1.00  0.00     0.000 H 
ATOM   3266 2HD1 LEU B  63      23.079  55.901  27.161  1.00  0.00     0.000 H 
ATOM   3267 3HD1 LEU B  63      24.269  55.181  28.131  1.00  0.00     0.000 H 
ATOM   3268  CD2 LEU B  63      20.892  55.413  28.729  1.00  5.89    -0.014 C 
ATOM   3269 1HD2 LEU B  63      20.940  56.335  29.354  1.00  0.00     0.000 H 
ATOM   3270 2HD2 LEU B  63      20.048  54.751  29.032  1.00  0.00     0.000 H 
ATOM   3271 3HD2 LEU B  63      20.563  55.636  27.687  1.00  0.00     0.000 H 
ATOM   3272  N   PHE B  64      19.213  53.382  26.433  1.00 11.15    -0.520 N 
ATOM   3273  HN  PHE B  64      18.986  53.972  27.234  1.00  0.00     0.248 HD
ATOM   3274  CA  PHE B  64      18.459  53.543  25.218  1.00 12.05     0.214 C 
ATOM   3275  HA  PHE B  64      18.934  52.984  24.379  1.00  0.00     0.000 H 
ATOM   3276  C   PHE B  64      18.468  55.035  24.946  1.00 16.16     0.526 C 
ATOM   3277  O   PHE B  64      18.333  55.824  25.888  1.00 15.85    -0.500 OA
ATOM   3278  CB  PHE B  64      17.002  53.124  25.394  1.00 10.73     0.038 C 
ATOM   3279  HB1 PHE B  64      16.567  53.701  26.244  1.00  0.00     0.000 H 
ATOM   3280  HB2 PHE B  64      16.413  53.519  24.534  1.00  0.00     0.000 H 
ATOM   3281  CG  PHE B  64      16.659  51.653  25.581  1.00  7.22     0.011 A 
ATOM   3282  CD1 PHE B  64      16.402  51.156  26.835  1.00  5.66    -0.011 A 
ATOM   3283  HD1 PHE B  64      16.492  51.808  27.720  1.00  0.00     0.000 H 
ATOM   3284  CD2 PHE B  64      16.551  50.825  24.479  1.00  9.18    -0.011 A 
ATOM   3285  HD2 PHE B  64      16.762  51.220  23.471  1.00  0.00     0.000 H 
ATOM   3286  CE1 PHE B  64      16.028  49.826  26.982  1.00 11.58     0.004 A 
ATOM   3287  HE1 PHE B  64      15.823  49.434  27.992  1.00  0.00     0.000 H 
ATOM   3288  CE2 PHE B  64      16.176  49.492  24.638  1.00 12.29     0.004 A 
ATOM   3289  HE2 PHE B  64      16.094  48.840  23.752  1.00  0.00     0.000 H 
ATOM   3290  CZ  PHE B  64      15.906  48.978  25.891  1.00 10.89    -0.003 A 
ATOM   3291  HZ  PHE B  64      15.603  47.925  26.020  1.00  0.00     0.000 H 
ATOM   3292  N   LYS B  65      18.670  55.482  23.712  1.00 18.31    -0.520 N 
ATOM   3293  HN  LYS B  65      18.924  54.818  22.980  1.00  0.00     0.248 HD
ATOM   3294  CA  LYS B  65      18.540  56.883  23.375  1.00 19.66     0.227 C 
ATOM   3295  HA  LYS B  65      17.963  57.406  24.173  1.00  0.00     0.000 H 
ATOM   3296  C   LYS B  65      17.749  56.901  22.085  1.00 19.17     0.526 C 
ATOM   3297  O   LYS B  65      17.799  55.989  21.260  1.00 21.92    -0.500 OA
ATOM   3298  CB  LYS B  65      19.916  57.614  23.158  1.00 22.82     0.039 C 
ATOM   3299  HB1 LYS B  65      19.844  58.615  23.644  1.00  0.00     0.000 H 
ATOM   3300  HB2 LYS B  65      20.674  57.097  23.792  1.00  0.00     0.000 H 
ATOM   3301  CG  LYS B  65      20.530  57.816  21.786  1.00 29.01     0.053 C 
ATOM   3302  HG1 LYS B  65      21.288  58.634  21.774  1.00  0.00     0.000 H 
ATOM   3303  HG2 LYS B  65      19.812  58.261  21.058  1.00  0.00     0.000 H 
ATOM   3304  CD  LYS B  65      21.107  56.466  21.298  1.00 37.22     0.048 C 
ATOM   3305  HD1 LYS B  65      21.961  56.175  21.953  1.00  0.00     0.000 H 
ATOM   3306  HD2 LYS B  65      20.379  55.653  21.526  1.00  0.00     0.000 H 
ATOM   3307  CE  LYS B  65      21.549  56.355  19.798  1.00 39.97     0.218 C 
ATOM   3308  HE1 LYS B  65      21.931  57.333  19.423  1.00  0.00     0.000 H 
ATOM   3309  HE2 LYS B  65      20.664  56.237  19.130  1.00  0.00     0.000 H 
ATOM   3310  NZ  LYS B  65      22.532  55.281  19.563  1.00 40.31    -0.272 N 
ATOM   3311  HZ1 LYS B  65      22.820  55.209  18.587  1.00  0.00     0.311 HD
ATOM   3312  HZ2 LYS B  65      22.182  54.386  19.906  1.00  0.00     0.311 HD
ATOM   3313  HZ3 LYS B  65      23.342  55.389  20.174  1.00  0.00     0.311 HD
ATOM   3314  N   GLY B  66      16.958  57.929  21.925  1.00 18.29    -0.520 N 
ATOM   3315  HN  GLY B  66      16.866  58.612  22.677  1.00  0.00     0.248 HD
ATOM   3316  CA  GLY B  66      16.221  58.112  20.717  1.00 20.85     0.246 C 
ATOM   3317  HA1 GLY B  66      16.697  57.654  19.819  1.00  0.00     0.000 H 
ATOM   3318  HA2 GLY B  66      15.274  57.525  20.668  1.00  0.00     0.000 H 
ATOM   3319  C   GLY B  66      16.029  59.585  20.619  1.00 22.55     0.526 C 
ATOM   3320  O   GLY B  66      15.799  60.238  21.631  1.00 25.72    -0.500 OA
ATOM   3321  N   GLN B  67      16.279  60.181  19.471  1.00 24.55    -0.520 N 
ATOM   3322  HN  GLN B  67      16.715  59.673  18.701  1.00  0.00     0.248 HD
ATOM   3323  CA  GLN B  67      15.918  61.579  19.330  1.00 24.86     0.210 C 
ATOM   3324  HA  GLN B  67      16.044  62.109  20.303  1.00  0.00     0.000 H 
ATOM   3325  C   GLN B  67      14.457  61.578  18.918  1.00 22.80     0.526 C 
ATOM   3326  O   GLN B  67      14.004  60.592  18.326  1.00 24.31    -0.500 OA
ATOM   3327  CB  GLN B  67      16.654  62.314  18.237  1.00 29.65     0.053 C 
ATOM   3328  HB1 GLN B  67      17.126  63.211  18.702  1.00  0.00     0.000 H 
ATOM   3329  HB2 GLN B  67      15.886  62.766  17.567  1.00  0.00     0.000 H 
ATOM   3330  CG  GLN B  67      17.704  61.662  17.345  1.00 33.78    -0.043 C 
ATOM   3331  HG1 GLN B  67      17.276  60.998  16.558  1.00  0.00     0.000 H 
ATOM   3332  HG2 GLN B  67      18.308  60.880  17.861  1.00  0.00     0.000 H 
ATOM   3333  CD  GLN B  67      18.538  62.819  16.789  1.00 39.72     0.675 C 
ATOM   3334  OE1 GLN B  67      18.822  63.808  17.506  1.00 39.32    -0.470 OA
ATOM   3335  NE2 GLN B  67      18.925  62.720  15.508  1.00 39.89    -0.867 N 
ATOM   3336 1HE2 GLN B  67      19.481  63.491  15.138  1.00  0.00     0.344 HD
ATOM   3337 2HE2 GLN B  67      18.694  61.916  14.925  1.00  0.00     0.344 HD
ATOM   3338  N   GLY B  68      13.716  62.644  19.200  1.00 17.75    -0.520 N 
ATOM   3339  HN  GLY B  68      14.140  63.445  19.668  1.00  0.00     0.248 HD
ATOM   3340  CA  GLY B  68      12.322  62.678  18.852  1.00 15.74     0.246 C 
ATOM   3341  HA1 GLY B  68      11.891  63.680  19.081  1.00  0.00     0.000 H 
ATOM   3342  HA2 GLY B  68      12.200  62.664  17.744  1.00  0.00     0.000 H 
ATOM   3343  C   GLY B  68      11.478  61.581  19.490  1.00 13.82     0.526 C 
ATOM   3344  O   GLY B  68      11.948  60.525  19.871  1.00 11.86    -0.500 OA
ATOM   3345  N   CYS B  69      10.202  61.890  19.636  1.00 18.81    -0.520 N 
ATOM   3346  HN  CYS B  69       9.900  62.823  19.356  1.00  0.00     0.248 HD
ATOM   3347  CA  CYS B  69       9.207  60.985  20.169  1.00 23.05     0.088 C 
ATOM   3348  HA  CYS B  69       9.732  60.067  20.523  1.00  0.00     0.000 H 
ATOM   3349  C   CYS B  69       8.169  60.564  19.150  1.00 29.14     0.526 C 
ATOM   3350  O   CYS B  69       7.277  61.361  18.767  1.00 32.05    -0.500 OA
ATOM   3351  CB  CYS B  69       8.456  61.580  21.351  1.00 18.69     0.143 C 
ATOM   3352  HB1 CYS B  69       7.361  61.368  21.353  1.00  0.00     0.000 H 
ATOM   3353  HB2 CYS B  69       8.362  62.691  21.323  1.00  0.00     0.000 H 
ATOM   3354  SG  CYS B  69       9.331  60.950  22.777  1.00 22.83     0.015 SA
ATOM   3355  N   PRO B  70       8.315  59.313  18.684  1.00 31.65    -0.257 N 
ATOM   3356  CA  PRO B  70       7.505  58.738  17.618  1.00 33.99     0.112 C 
ATOM   3357  HA  PRO B  70       7.553  59.385  16.712  1.00  0.00     0.000 H 
ATOM   3358  C   PRO B  70       6.057  58.604  18.087  1.00 37.00     0.526 C 
ATOM   3359  O   PRO B  70       5.743  58.793  19.267  1.00 37.27    -0.500 OA
ATOM   3360  CB  PRO B  70       8.187  57.418  17.346  1.00 35.18    -0.001 C 
ATOM   3361  HB1 PRO B  70       8.216  57.145  16.265  1.00  0.00     0.000 H 
ATOM   3362  HB2 PRO B  70       7.602  56.534  17.691  1.00  0.00     0.000 H 
ATOM   3363  CG  PRO B  70       9.577  57.524  17.990  1.00 34.91     0.036 C 
ATOM   3364  HG1 PRO B  70      10.380  57.955  17.348  1.00  0.00     0.000 H 
ATOM   3365  HG2 PRO B  70      10.110  56.560  18.161  1.00  0.00     0.000 H 
ATOM   3366  CD  PRO B  70       9.227  58.313  19.228  1.00 32.65     0.084 C 
ATOM   3367  HD1 PRO B  70       8.825  57.713  20.077  1.00  0.00     0.000 H 
ATOM   3368  HD2 PRO B  70      10.096  58.720  19.795  1.00  0.00     0.000 H 
ATOM   3369  N   SER B  71       5.161  58.269  17.168  1.00 40.11    -0.520 N 
ATOM   3370  HN  SER B  71       5.455  58.133  16.201  1.00  0.00     0.248 HD
ATOM   3371  CA  SER B  71       3.756  58.093  17.529  1.00 43.71     0.292 C 
ATOM   3372  HA  SER B  71       3.446  58.951  18.170  1.00  0.00     0.000 H 
ATOM   3373  C   SER B  71       3.551  56.794  18.323  1.00 44.26     0.526 C 
ATOM   3374  O   SER B  71       4.375  55.863  18.497  1.00 37.68    -0.500 OA
ATOM   3375  CB  SER B  71       2.873  58.106  16.211  1.00 44.21     0.194 C 
ATOM   3376  HB1 SER B  71       3.158  57.235  15.576  1.00  0.00     0.000 H 
ATOM   3377  HB2 SER B  71       3.196  58.957  15.567  1.00  0.00     0.000 H 
ATOM   3378  OG  SER B  71       1.446  58.138  16.343  1.00 41.37    -0.550 OA
ATOM   3379  HG  SER B  71       0.917  58.146  15.554  1.00  0.00     0.310 HD
ATOM   3380  N   THR B  72       2.276  56.869  18.709  1.00 47.78    -0.520 N 
ATOM   3381  HN  THR B  72       1.742  57.675  18.385  1.00  0.00     0.248 HD
ATOM   3382  CA  THR B  72       1.574  55.907  19.550  1.00 50.20     0.268 C 
ATOM   3383  HA  THR B  72       0.632  56.383  19.910  1.00  0.00     0.000 H 
ATOM   3384  C   THR B  72       2.447  55.561  20.789  1.00 47.46     0.526 C 
ATOM   3385  O   THR B  72       2.799  56.491  21.565  1.00 48.20    -0.500 OA
ATOM   3386  CB  THR B  72       1.184  54.679  18.617  1.00 51.04     0.211 C 
ATOM   3387  HB  THR B  72       2.087  54.058  18.409  1.00  0.00     0.000 H 
ATOM   3388  OG1 THR B  72       0.580  55.103  17.372  1.00 49.23    -0.550 OA
ATOM   3389  HG1 THR B  72       0.347  54.370  16.815  1.00  0.00     0.310 HD
ATOM   3390  CG2 THR B  72       0.137  53.845  19.361  1.00 51.95     0.007 C 
ATOM   3391 1HG2 THR B  72      -0.136  52.984  18.707  1.00  0.00     0.000 H 
ATOM   3392 2HG2 THR B  72      -0.747  54.444  19.681  1.00  0.00     0.000 H 
ATOM   3393 3HG2 THR B  72       0.475  53.529  20.375  1.00  0.00     0.000 H 
ATOM   3394  N   HIS B  73       2.809  54.324  21.107  1.00 41.99    -0.520 N 
ATOM   3395  HN  HIS B  73       2.500  53.526  20.553  1.00  0.00     0.248 HD
ATOM   3396  CA  HIS B  73       3.652  54.147  22.260  1.00 37.11     0.195 C 
ATOM   3397  HA  HIS B  73       4.215  55.094  22.431  1.00  0.00     0.000 H 
ATOM   3398  C   HIS B  73       4.638  53.047  22.039  1.00 32.94     0.526 C 
ATOM   3399  O   HIS B  73       4.301  51.886  21.787  1.00 32.39    -0.500 OA
ATOM   3400  CB  HIS B  73       2.823  53.851  23.503  1.00 39.60     0.211 C 
ATOM   3401  HB1 HIS B  73       3.026  52.829  23.900  1.00  0.00     0.000 H 
ATOM   3402  HB2 HIS B  73       1.743  53.725  23.257  1.00  0.00     0.000 H 
ATOM   3403  CG  HIS B  73       3.039  54.927  24.573  1.00 40.36     0.103 A 
ATOM   3404  ND1 HIS B  73       3.343  56.214  24.399  1.00 42.20    -0.613 N 
ATOM   3405  HD1 HIS B  73       3.542  56.673  23.510  1.00  0.00     0.478 HD
ATOM   3406  CD2 HIS B  73       2.872  54.736  25.926  1.00 41.49     0.353 A 
ATOM   3407  HD2 HIS B  73       2.627  53.787  26.432  1.00  0.00     0.000 H 
ATOM   3408  CE1 HIS B  73       3.339  56.782  25.586  1.00 41.08     0.719 A 
ATOM   3409  HE1 HIS B  73       3.542  57.849  25.780  1.00  0.00     0.000 H 
ATOM   3410  NE2 HIS B  73       3.060  55.896  26.495  1.00 41.01    -0.686 N 
ATOM   3411  HE2 HIS B  73       2.998  56.078  27.497  1.00  0.00     0.486 HD
ATOM   3412  N   VAL B  74       5.835  53.613  22.112  1.00 26.99    -0.520 N 
ATOM   3413  HN  VAL B  74       5.890  54.621  22.257  1.00  0.00     0.248 HD
ATOM   3414  CA  VAL B  74       7.049  52.872  21.996  1.00 26.72     0.201 C 
ATOM   3415  HA  VAL B  74       7.034  52.353  21.009  1.00  0.00     0.000 H 
ATOM   3416  C   VAL B  74       7.193  51.801  23.080  1.00 26.31     0.526 C 
ATOM   3417  O   VAL B  74       7.254  50.656  22.649  1.00 29.87    -0.500 OA
ATOM   3418  CB  VAL B  74       8.280  53.862  21.997  1.00 29.50     0.033 C 
ATOM   3419  HB  VAL B  74       8.257  54.496  22.914  1.00  0.00     0.000 H 
ATOM   3420  CG1 VAL B  74       9.573  53.038  21.964  1.00 29.26     0.006 C 
ATOM   3421 1HG1 VAL B  74       9.539  52.392  22.872  1.00  0.00     0.000 H 
ATOM   3422 2HG1 VAL B  74      10.497  53.657  21.890  1.00  0.00     0.000 H 
ATOM   3423 3HG1 VAL B  74       9.718  52.471  21.015  1.00  0.00     0.000 H 
ATOM   3424  CG2 VAL B  74       8.328  54.762  20.733  1.00 27.76     0.006 C 
ATOM   3425 1HG2 VAL B  74       7.388  55.361  20.757  1.00  0.00     0.000 H 
ATOM   3426 2HG2 VAL B  74       8.473  54.195  19.784  1.00  0.00     0.000 H 
ATOM   3427 3HG2 VAL B  74       9.252  55.381  20.659  1.00  0.00     0.000 H 
ATOM   3428  N   LEU B  75       7.177  52.006  24.405  1.00 19.98    -0.520 N 
ATOM   3429  HN  LEU B  75       6.955  52.934  24.767  1.00  0.00     0.248 HD
ATOM   3430  CA  LEU B  75       7.476  50.908  25.351  1.00 15.20     0.204 C 
ATOM   3431  HA  LEU B  75       7.553  51.361  26.367  1.00  0.00     0.000 H 
ATOM   3432  C   LEU B  75       8.809  50.158  25.082  1.00 16.24     0.526 C 
ATOM   3433  O   LEU B  75       9.032  49.471  24.087  1.00 16.35    -0.500 OA
ATOM   3434  CB  LEU B  75       6.329  49.880  25.399  1.00 13.11     0.016 C 
ATOM   3435  HB1 LEU B  75       6.696  48.940  25.873  1.00  0.00     0.000 H 
ATOM   3436  HB2 LEU B  75       6.111  49.522  24.366  1.00  0.00     0.000 H 
ATOM   3437  CG  LEU B  75       5.024  50.310  26.072  1.00 14.81     0.054 C 
ATOM   3438  HG  LEU B  75       4.699  51.284  25.637  1.00  0.00     0.000 H 
ATOM   3439  CD1 LEU B  75       3.873  49.303  25.947  1.00  9.85    -0.014 C 
ATOM   3440 1HD1 LEU B  75       2.922  49.616  26.437  1.00  0.00     0.000 H 
ATOM   3441 2HD1 LEU B  75       4.191  48.304  26.325  1.00  0.00     0.000 H 
ATOM   3442 3HD1 LEU B  75       3.691  49.055  24.875  1.00  0.00     0.000 H 
ATOM   3443  CD2 LEU B  75       5.387  50.519  27.505  1.00 15.41    -0.014 C 
ATOM   3444 1HD2 LEU B  75       4.436  50.832  27.995  1.00  0.00     0.000 H 
ATOM   3445 2HD2 LEU B  75       6.233  51.229  27.660  1.00  0.00     0.000 H 
ATOM   3446 3HD2 LEU B  75       5.874  49.637  27.983  1.00  0.00     0.000 H 
ATOM   3447  N   LEU B  76       9.798  50.344  25.944  1.00 12.26    -0.520 N 
ATOM   3448  HN  LEU B  76       9.645  50.981  26.726  1.00  0.00     0.248 HD
ATOM   3449  CA  LEU B  76      11.080  49.691  25.833  1.00 12.20     0.204 C 
ATOM   3450  HA  LEU B  76      11.173  49.162  24.856  1.00  0.00     0.000 H 
ATOM   3451  C   LEU B  76      11.137  48.688  27.009  1.00 16.23     0.526 C 
ATOM   3452  O   LEU B  76      10.713  49.018  28.148  1.00 15.72    -0.500 OA
ATOM   3453  CB  LEU B  76      12.186  50.684  26.008  1.00 13.62     0.016 C 
ATOM   3454  HB1 LEU B  76      13.091  50.274  25.502  1.00  0.00     0.000 H 
ATOM   3455  HB2 LEU B  76      12.488  50.667  27.081  1.00  0.00     0.000 H 
ATOM   3456  CG  LEU B  76      12.048  52.126  25.596  1.00 11.29     0.054 C 
ATOM   3457  HG  LEU B  76      11.043  52.500  25.902  1.00  0.00     0.000 H 
ATOM   3458  CD1 LEU B  76      13.130  52.943  26.311  1.00  7.44    -0.014 C 
ATOM   3459 1HD1 LEU B  76      13.028  54.011  26.006  1.00  0.00     0.000 H 
ATOM   3460 2HD1 LEU B  76      14.156  52.543  26.132  1.00  0.00     0.000 H 
ATOM   3461 3HD1 LEU B  76      13.105  52.810  27.418  1.00  0.00     0.000 H 
ATOM   3462  CD2 LEU B  76      12.189  52.251  24.110  1.00 11.41    -0.014 C 
ATOM   3463 1HD2 LEU B  76      12.087  53.319  23.805  1.00  0.00     0.000 H 
ATOM   3464 2HD2 LEU B  76      11.474  51.591  23.566  1.00  0.00     0.000 H 
ATOM   3465 3HD2 LEU B  76      13.140  51.801  23.741  1.00  0.00     0.000 H 
ATOM   3466  N   THR B  77      11.612  47.457  26.768  1.00 10.25    -0.520 N 
ATOM   3467  HN  THR B  77      11.928  47.201  25.833  1.00  0.00     0.248 HD
ATOM   3468  CA  THR B  77      11.671  46.512  27.831  1.00  7.68     0.268 C 
ATOM   3469  HA  THR B  77      11.478  47.054  28.786  1.00  0.00     0.000 H 
ATOM   3470  C   THR B  77      13.053  45.893  27.913  1.00 10.31     0.526 C 
ATOM   3471  O   THR B  77      13.954  45.998  27.060  1.00 11.35    -0.500 OA
ATOM   3472  CB  THR B  77      10.550  45.419  27.655  1.00 10.51     0.211 C 
ATOM   3473  HB  THR B  77      10.481  44.837  28.603  1.00  0.00     0.000 H 
ATOM   3474  OG1 THR B  77      10.948  44.532  26.620  1.00 13.04    -0.550 OA
ATOM   3475  HG1 THR B  77      11.801  44.153  26.797  1.00  0.00     0.310 HD
ATOM   3476  CG2 THR B  77       9.152  46.040  27.365  1.00  8.23     0.007 C 
ATOM   3477 1HG2 THR B  77       8.839  46.736  28.178  1.00  0.00     0.000 H 
ATOM   3478 2HG2 THR B  77       8.384  45.252  27.185  1.00  0.00     0.000 H 
ATOM   3479 3HG2 THR B  77       9.125  46.538  26.368  1.00  0.00     0.000 H 
ATOM   3480  N   HIS B  78      13.262  45.326  29.087  1.00 12.09    -0.520 N 
ATOM   3481  HN  HIS B  78      12.522  45.336  29.789  1.00  0.00     0.248 HD
ATOM   3482  CA  HIS B  78      14.523  44.692  29.390  1.00 12.54     0.195 C 
ATOM   3483  HA  HIS B  78      14.956  44.249  28.463  1.00  0.00     0.000 H 
ATOM   3484  C   HIS B  78      14.231  43.588  30.404  1.00 11.62     0.526 C 
ATOM   3485  O   HIS B  78      13.570  43.874  31.405  1.00  7.48    -0.500 OA
ATOM   3486  CB  HIS B  78      15.433  45.786  29.910  1.00 11.99     0.211 C 
ATOM   3487  HB1 HIS B  78      14.914  46.394  30.687  1.00  0.00     0.000 H 
ATOM   3488  HB2 HIS B  78      15.589  46.571  29.134  1.00  0.00     0.000 H 
ATOM   3489  CG  HIS B  78      16.757  45.274  30.427  1.00 14.86     0.103 A 
ATOM   3490  ND1 HIS B  78      17.393  45.719  31.500  1.00 19.47    -0.613 N 
ATOM   3491  HD1 HIS B  78      17.077  46.466  32.119  1.00  0.00     0.478 HD
ATOM   3492  CD2 HIS B  78      17.509  44.271  29.876  1.00 16.62     0.353 A 
ATOM   3493  HD2 HIS B  78      17.285  43.679  28.973  1.00  0.00     0.000 H 
ATOM   3494  CE1 HIS B  78      18.492  45.034  31.625  1.00 18.01     0.719 A 
ATOM   3495  HE1 HIS B  78      19.247  45.164  32.419  1.00  0.00     0.000 H 
ATOM   3496  NE2 HIS B  78      18.550  44.171  30.657  1.00 18.18    -0.686 N 
ATOM   3497  HE2 HIS B  78      19.309  43.503  30.524  1.00  0.00     0.486 HD
ATOM   3498  N   THR B  79      14.660  42.349  30.128  1.00  6.77    -0.520 N 
ATOM   3499  HN  THR B  79      15.134  42.165  29.244  1.00  0.00     0.248 HD
ATOM   3500  CA  THR B  79      14.458  41.272  31.068  1.00 13.36     0.268 C 
ATOM   3501  HA  THR B  79      14.381  41.711  32.090  1.00  0.00     0.000 H 
ATOM   3502  C   THR B  79      15.650  40.304  31.049  1.00 12.21     0.526 C 
ATOM   3503  O   THR B  79      16.544  40.361  30.191  1.00  7.79    -0.500 OA
ATOM   3504  CB  THR B  79      13.120  40.453  30.775  1.00 14.95     0.211 C 
ATOM   3505  HB  THR B  79      13.033  39.601  31.489  1.00  0.00     0.000 H 
ATOM   3506  OG1 THR B  79      13.264  39.963  29.458  1.00 17.46    -0.550 OA
ATOM   3507  HG1 THR B  79      14.076  39.470  29.473  1.00  0.00     0.310 HD
ATOM   3508  CG2 THR B  79      11.812  41.247  30.751  1.00 19.78     0.007 C 
ATOM   3509 1HG2 THR B  79      11.698  41.634  31.791  1.00  0.00     0.000 H 
ATOM   3510 2HG2 THR B  79      10.934  40.665  30.384  1.00  0.00     0.000 H 
ATOM   3511 3HG2 THR B  79      11.775  42.038  29.966  1.00  0.00     0.000 H 
ATOM   3512  N   ILE B  80      15.694  39.495  32.091  1.00  7.89    -0.520 N 
ATOM   3513  HN  ILE B  80      14.998  39.597  32.830  1.00  0.00     0.248 HD
ATOM   3514  CA  ILE B  80      16.695  38.478  32.209  1.00  9.19     0.199 C 
ATOM   3515  HA  ILE B  80      17.245  38.364  31.246  1.00  0.00     0.000 H 
ATOM   3516  C   ILE B  80      15.837  37.237  32.480  1.00 12.33     0.526 C 
ATOM   3517  O   ILE B  80      14.875  37.218  33.272  1.00  9.10    -0.500 OA
ATOM   3518  CB  ILE B  80      17.706  38.755  33.386  1.00  6.62     0.030 C 
ATOM   3519  HB  ILE B  80      17.131  38.776  34.341  1.00  0.00     0.000 H 
ATOM   3520  CG1 ILE B  80      18.377  40.093  33.211  1.00  3.78     0.017 C 
ATOM   3521 1HG1 ILE B  80      18.697  40.229  32.152  1.00  0.00     0.000 H 
ATOM   3522 2HG1 ILE B  80      17.628  40.915  33.293  1.00  0.00     0.000 H 
ATOM   3523  CG2 ILE B  80      18.720  37.624  33.468  1.00  6.11     0.001 C 
ATOM   3524 1HG2 ILE B  80      19.435  37.820  34.301  1.00  0.00     0.000 H 
ATOM   3525 2HG2 ILE B  80      19.242  37.457  32.497  1.00  0.00     0.000 H 
ATOM   3526 3HG2 ILE B  80      18.230  36.627  33.561  1.00  0.00     0.000 H 
ATOM   3527  CD1 ILE B  80      19.536  40.345  34.145  1.00  7.07    -0.001 C 
ATOM   3528 1HD1 ILE B  80      20.032  41.335  34.016  1.00  0.00     0.000 H 
ATOM   3529 2HD1 ILE B  80      20.285  39.523  34.063  1.00  0.00     0.000 H 
ATOM   3530 3HD1 ILE B  80      19.216  40.209  35.204  1.00  0.00     0.000 H 
ATOM   3531  N   SER B  81      16.205  36.187  31.762  1.00 14.46    -0.520 N 
ATOM   3532  HN  SER B  81      17.017  36.268  31.150  1.00  0.00     0.248 HD
ATOM   3533  CA  SER B  81      15.489  34.920  31.818  1.00 15.54     0.292 C 
ATOM   3534  HA  SER B  81      14.712  34.936  32.618  1.00  0.00     0.000 H 
ATOM   3535  C   SER B  81      16.559  33.939  32.135  1.00 11.54     0.526 C 
ATOM   3536  O   SER B  81      17.729  34.151  31.742  1.00  7.69    -0.500 OA
ATOM   3537  CB  SER B  81      14.885  34.483  30.472  1.00 17.31     0.194 C 
ATOM   3538  HB1 SER B  81      15.525  33.725  29.962  1.00  0.00     0.000 H 
ATOM   3539  HB2 SER B  81      13.969  33.864  30.615  1.00  0.00     0.000 H 
ATOM   3540  OG  SER B  81      14.632  35.609  29.631  1.00 26.60    -0.550 OA
ATOM   3541  HG  SER B  81      14.259  35.339  28.800  1.00  0.00     0.310 HD
ATOM   3542  N   ARG B  82      16.078  32.944  32.875  1.00  8.29    -0.520 N 
ATOM   3543  HN  ARG B  82      15.121  32.991  33.225  1.00  0.00     0.248 HD
ATOM   3544  CA  ARG B  82      16.896  31.803  33.186  1.00 13.47     0.237 C 
ATOM   3545  HA  ARG B  82      17.964  31.995  32.929  1.00  0.00     0.000 H 
ATOM   3546  C   ARG B  82      16.299  30.786  32.268  1.00 11.81     0.526 C 
ATOM   3547  O   ARG B  82      15.097  30.697  32.139  1.00 17.56    -0.500 OA
ATOM   3548  CB  ARG B  82      16.737  31.498  34.674  1.00 16.16     0.049 C 
ATOM   3549  HB1 ARG B  82      17.770  31.478  35.093  1.00  0.00     0.000 H 
ATOM   3550  HB2 ARG B  82      16.290  32.414  35.127  1.00  0.00     0.000 H 
ATOM   3551  CG  ARG B  82      16.002  30.313  35.312  1.00 18.34     0.058 C 
ATOM   3552  HG1 ARG B  82      15.285  30.653  36.095  1.00  0.00     0.000 H 
ATOM   3553  HG2 ARG B  82      15.277  29.853  34.601  1.00  0.00     0.000 H 
ATOM   3554  CD  ARG B  82      16.982  29.272  35.864  1.00 19.21     0.111 C 
ATOM   3555  HD1 ARG B  82      17.987  29.705  36.079  1.00  0.00     0.000 H 
ATOM   3556  HD2 ARG B  82      17.295  28.530  35.093  1.00  0.00     0.000 H 
ATOM   3557  NE  ARG B  82      16.391  28.647  37.023  1.00 21.65    -0.493 N 
ATOM   3558  HE  ARG B  82      15.745  29.197  37.589  1.00  0.00     0.294 HD
ATOM   3559  CZ  ARG B  82      16.644  27.380  37.400  1.00 25.08     0.814 C 
ATOM   3560  NH1 ARG B  82      16.034  26.878  38.491  1.00 25.17    -0.634 N 
ATOM   3561 1HH1 ARG B  82      15.379  27.480  38.990  1.00  0.00     0.361 HD
ATOM   3562 2HH1 ARG B  82      16.226  25.918  38.777  1.00  0.00     0.361 HD
ATOM   3563  NH2 ARG B  82      17.504  26.590  36.745  1.00 24.94    -0.634 N 
ATOM   3564 1HH2 ARG B  82      17.966  26.970  35.919  1.00  0.00     0.361 HD
ATOM   3565 2HH2 ARG B  82      17.696  25.630  37.031  1.00  0.00     0.361 HD
ATOM   3566  N   ILE B  83      17.092  30.209  31.411  1.00 17.58    -0.520 N 
ATOM   3567  HN  ILE B  83      18.056  30.537  31.348  1.00  0.00     0.248 HD
ATOM   3568  CA  ILE B  83      16.683  29.140  30.554  1.00 16.27     0.199 C 
ATOM   3569  HA  ILE B  83      15.587  28.964  30.662  1.00  0.00     0.000 H 
ATOM   3570  C   ILE B  83      17.461  28.012  31.233  1.00 18.44     0.526 C 
ATOM   3571  O   ILE B  83      18.682  27.891  31.283  1.00 16.99    -0.500 OA
ATOM   3572  CB  ILE B  83      17.043  29.471  28.996  1.00 19.44     0.030 C 
ATOM   3573  HB  ILE B  83      16.094  29.702  28.458  1.00  0.00     0.000 H 
ATOM   3574  CG1 ILE B  83      17.617  28.245  28.419  1.00 21.11     0.017 C 
ATOM   3575 1HG1 ILE B  83      18.446  27.827  29.036  1.00  0.00     0.000 H 
ATOM   3576 2HG1 ILE B  83      18.203  28.440  27.491  1.00  0.00     0.000 H 
ATOM   3577  CG2 ILE B  83      18.031  30.568  28.706  1.00 19.94     0.001 C 
ATOM   3578 1HG2 ILE B  83      18.277  30.794  27.642  1.00  0.00     0.000 H 
ATOM   3579 2HG2 ILE B  83      18.976  30.361  29.260  1.00  0.00     0.000 H 
ATOM   3580 3HG2 ILE B  83      17.690  31.504  29.206  1.00  0.00     0.000 H 
ATOM   3581  CD1 ILE B  83      16.494  27.253  28.202  1.00 21.43    -0.001 C 
ATOM   3582 1HD1 ILE B  83      16.929  26.324  27.765  1.00  0.00     0.000 H 
ATOM   3583 2HD1 ILE B  83      15.665  27.671  27.585  1.00  0.00     0.000 H 
ATOM   3584 3HD1 ILE B  83      15.908  27.058  29.130  1.00  0.00     0.000 H 
ATOM   3585  N   ALA B  84      16.596  27.272  31.932  1.00 21.57    -0.520 N 
ATOM   3586  HN  ALA B  84      15.614  27.544  31.881  1.00  0.00     0.248 HD
ATOM   3587  CA  ALA B  84      16.915  26.112  32.763  1.00 18.17     0.215 C 
ATOM   3588  HA  ALA B  84      17.421  26.506  33.675  1.00  0.00     0.000 H 
ATOM   3589  C   ALA B  84      17.781  24.953  32.250  1.00 19.37     0.526 C 
ATOM   3590  O   ALA B  84      18.728  25.122  31.508  1.00 19.57    -0.500 OA
ATOM   3591  CB  ALA B  84      15.580  25.592  33.208  1.00 17.67     0.031 C 
ATOM   3592  HB1 ALA B  84      14.951  26.434  33.581  1.00  0.00     0.000 H 
ATOM   3593  HB2 ALA B  84      15.678  24.777  33.962  1.00  0.00     0.000 H 
ATOM   3594  HB3 ALA B  84      15.069  25.010  32.406  1.00  0.00     0.000 H 
ATOM   3595  N   VAL B  85      17.562  23.756  32.764  1.00 23.07    -0.520 N 
ATOM   3596  HN  VAL B  85      16.908  23.705  33.545  1.00  0.00     0.248 HD
ATOM   3597  CA  VAL B  85      18.163  22.494  32.325  1.00 25.56     0.201 C 
ATOM   3598  HA  VAL B  85      18.521  22.595  31.274  1.00  0.00     0.000 H 
ATOM   3599  C   VAL B  85      17.042  21.445  32.391  1.00 30.11     0.526 C 
ATOM   3600  O   VAL B  85      17.063  20.517  31.584  1.00 28.70    -0.500 OA
ATOM   3601  CB  VAL B  85      19.318  21.980  33.221  1.00 25.12     0.033 C 
ATOM   3602  HB  VAL B  85      19.308  20.865  33.235  1.00  0.00     0.000 H 
ATOM   3603  CG1 VAL B  85      20.615  22.456  32.658  1.00 23.52     0.006 C 
ATOM   3604 1HG1 VAL B  85      21.446  22.086  33.303  1.00  0.00     0.000 H 
ATOM   3605 2HG1 VAL B  85      20.640  23.563  32.525  1.00  0.00     0.000 H 
ATOM   3606 3HG1 VAL B  85      20.746  22.168  31.589  1.00  0.00     0.000 H 
ATOM   3607  CG2 VAL B  85      19.204  22.502  34.642  1.00 26.82     0.006 C 
ATOM   3608 1HG2 VAL B  85      20.035  22.132  35.287  1.00  0.00     0.000 H 
ATOM   3609 2HG2 VAL B  85      18.209  22.261  35.084  1.00  0.00     0.000 H 
ATOM   3610 3HG2 VAL B  85      19.139  23.615  34.662  1.00  0.00     0.000 H 
ATOM   3611  N   SER B  86      16.075  21.572  33.346  1.00 33.73    -0.520 N 
ATOM   3612  HN  SER B  86      16.190  22.317  34.033  1.00  0.00     0.248 HD
ATOM   3613  CA  SER B  86      14.891  20.729  33.464  1.00 36.59     0.292 C 
ATOM   3614  HA  SER B  86      15.107  19.700  33.093  1.00  0.00     0.000 H 
ATOM   3615  C   SER B  86      13.870  21.408  32.574  1.00 40.77     0.526 C 
ATOM   3616  O   SER B  86      14.087  21.296  31.364  1.00 41.29    -0.500 OA
ATOM   3617  CB  SER B  86      14.358  20.679  34.884  1.00 36.00     0.194 C 
ATOM   3618  HB1 SER B  86      13.315  21.071  34.935  1.00  0.00     0.000 H 
ATOM   3619  HB2 SER B  86      14.171  19.628  35.205  1.00  0.00     0.000 H 
ATOM   3620  OG  SER B  86      15.201  21.352  35.807  1.00 39.04    -0.550 OA
ATOM   3621  HG  SER B  86      14.867  21.321  36.696  1.00  0.00     0.310 HD
ATOM   3622  N   TYR B  87      12.851  22.183  33.028  1.00 44.21    -0.520 N 
ATOM   3623  HN  TYR B  87      12.777  22.318  34.036  1.00  0.00     0.248 HD
ATOM   3624  CA  TYR B  87      11.836  22.849  32.174  1.00 46.25     0.245 C 
ATOM   3625  HA  TYR B  87      11.484  22.114  31.413  1.00  0.00     0.000 H 
ATOM   3626  C   TYR B  87      12.391  24.090  31.430  1.00 45.68     0.526 C 
ATOM   3627  O   TYR B  87      11.812  25.169  31.348  1.00 45.86    -0.500 OA
ATOM   3628  CB  TYR B  87      10.655  23.153  33.140  1.00 50.10     0.022 C 
ATOM   3629  HB  TYR B  87      10.657  22.667  34.130  1.00  0.00     0.000 H 
ATOM   3630  CG  TYR B  87       9.484  24.091  32.798  1.00 53.30    -0.001 A 
ATOM   3631  CD1 TYR B  87       9.519  25.435  33.138  1.00 55.59    -0.035 A 
ATOM   3632  HD1 TYR B  87      10.439  25.874  33.559  1.00  0.00     0.000 H 
ATOM   3633  CD2 TYR B  87       8.321  23.593  32.252  1.00 55.39    -0.035 A 
ATOM   3634  HD2 TYR B  87       8.285  22.528  31.968  1.00  0.00     0.000 H 
ATOM   3635  CE1 TYR B  87       8.399  26.226  32.949  1.00 57.38     0.100 A 
ATOM   3636  HE1 TYR B  87       8.435  27.292  33.231  1.00  0.00     0.000 H 
ATOM   3637  CE2 TYR B  87       7.194  24.375  32.045  1.00 56.86     0.100 A 
ATOM   3638  HE2 TYR B  87       6.285  23.941  31.595  1.00  0.00     0.000 H 
ATOM   3639  CZ  TYR B  87       7.228  25.702  32.410  1.00 57.55    -0.121 A 
ATOM   3640  OH  TYR B  87       6.072  26.470  32.323  1.00 55.97    -0.368 OA
ATOM   3641  HH  TYR B  87       6.095  27.386  32.575  1.00  0.00     0.339 HD
ATOM   3642  N   GLN B  88      13.516  23.808  30.780  1.00 45.34    -0.520 N 
ATOM   3643  HN  GLN B  88      13.776  22.822  30.786  1.00  0.00     0.248 HD
ATOM   3644  CA  GLN B  88      14.432  24.669  30.066  1.00 45.23     0.210 C 
ATOM   3645  HA  GLN B  88      14.875  25.386  30.796  1.00  0.00     0.000 H 
ATOM   3646  C   GLN B  88      13.786  25.485  28.918  1.00 43.41     0.526 C 
ATOM   3647  O   GLN B  88      14.065  25.262  27.749  1.00 40.86    -0.500 OA
ATOM   3648  CB  GLN B  88      15.533  23.636  29.671  1.00 49.00     0.053 C 
ATOM   3649  HB1 GLN B  88      15.746  23.110  30.631  1.00  0.00     0.000 H 
ATOM   3650  HB2 GLN B  88      14.978  22.897  29.048  1.00  0.00     0.000 H 
ATOM   3651  CG  GLN B  88      16.936  23.707  28.981  1.00 53.27    -0.043 C 
ATOM   3652  HG1 GLN B  88      16.904  24.448  28.148  1.00  0.00     0.000 H 
ATOM   3653  HG2 GLN B  88      17.664  24.199  29.667  1.00  0.00     0.000 H 
ATOM   3654  CD  GLN B  88      17.544  22.350  28.455  1.00 54.31     0.675 C 
ATOM   3655  OE1 GLN B  88      18.100  22.295  27.351  1.00 53.33    -0.470 OA
ATOM   3656  NE2 GLN B  88      17.482  21.171  29.081  1.00 51.81    -0.867 N 
ATOM   3657 1HE2 GLN B  88      17.875  20.293  28.741  1.00  0.00     0.344 HD
ATOM   3658 2HE2 GLN B  88      17.024  21.216  29.991  1.00  0.00     0.344 HD
ATOM   3659  N   THR B  89      12.845  26.394  29.188  1.00 39.23    -0.520 N 
ATOM   3660  HN  THR B  89      12.410  26.350  30.110  1.00  0.00     0.248 HD
ATOM   3661  CA  THR B  89      12.383  27.442  28.287  1.00 31.60     0.268 C 
ATOM   3662  HA  THR B  89      12.974  27.444  27.341  1.00  0.00     0.000 H 
ATOM   3663  C   THR B  89      12.690  28.699  29.132  1.00 28.11     0.526 C 
ATOM   3664  O   THR B  89      13.229  28.576  30.249  1.00 29.42    -0.500 OA
ATOM   3665  CB  THR B  89      10.851  27.390  27.988  1.00 31.05     0.211 C 
ATOM   3666  HB  THR B  89      10.535  28.426  27.723  1.00  0.00     0.000 H 
ATOM   3667  OG1 THR B  89      10.157  27.034  29.182  1.00 31.60    -0.550 OA
ATOM   3668  HG1 THR B  89       9.225  27.002  29.000  1.00  0.00     0.310 HD
ATOM   3669  CG2 THR B  89      10.584  26.511  26.762  1.00 33.80     0.007 C 
ATOM   3670 1HG2 THR B  89       9.490  26.474  26.549  1.00  0.00     0.000 H 
ATOM   3671 2HG2 THR B  89      11.022  25.492  26.876  1.00  0.00     0.000 H 
ATOM   3672 3HG2 THR B  89      11.171  26.843  25.874  1.00  0.00     0.000 H 
ATOM   3673  N   LYS B  90      12.337  29.909  28.688  1.00 22.12    -0.520 N 
ATOM   3674  HN  LYS B  90      11.812  29.981  27.816  1.00  0.00     0.248 HD
ATOM   3675  CA  LYS B  90      12.678  31.129  29.410  1.00 21.98     0.227 C 
ATOM   3676  HA  LYS B  90      13.748  31.065  29.719  1.00  0.00     0.000 H 
ATOM   3677  C   LYS B  90      11.826  31.372  30.668  1.00 21.78     0.526 C 
ATOM   3678  O   LYS B  90      10.604  31.474  30.487  1.00 22.23    -0.500 OA
ATOM   3679  CB  LYS B  90      12.507  32.375  28.499  1.00 19.85     0.039 C 
ATOM   3680  HB1 LYS B  90      12.729  33.282  29.108  1.00  0.00     0.000 H 
ATOM   3681  HB2 LYS B  90      11.420  32.503  28.288  1.00  0.00     0.000 H 
ATOM   3682  CG  LYS B  90      13.263  32.493  27.180  1.00 16.79     0.053 C 
ATOM   3683  HG1 LYS B  90      12.809  33.280  26.534  1.00  0.00     0.000 H 
ATOM   3684  HG2 LYS B  90      13.080  31.599  26.539  1.00  0.00     0.000 H 
ATOM   3685  CD  LYS B  90      14.739  32.732  27.353  1.00 15.19     0.048 C 
ATOM   3686  HD1 LYS B  90      15.147  32.115  28.188  1.00  0.00     0.000 H 
ATOM   3687  HD2 LYS B  90      14.931  33.749  27.767  1.00  0.00     0.000 H 
ATOM   3688  CE  LYS B  90      15.536  32.506  26.068  1.00 13.49     0.218 C 
ATOM   3689  HE1 LYS B  90      16.627  32.642  26.255  1.00  0.00     0.000 H 
ATOM   3690  HE2 LYS B  90      15.525  31.427  25.786  1.00  0.00     0.000 H 
ATOM   3691  NZ  LYS B  90      15.108  33.323  24.959  1.00 11.74    -0.272 N 
ATOM   3692  HZ1 LYS B  90      15.640  33.172  24.102  1.00  0.00     0.311 HD
ATOM   3693  HZ2 LYS B  90      15.118  34.310  25.217  1.00  0.00     0.311 HD
ATOM   3694  HZ3 LYS B  90      14.110  33.199  24.788  1.00  0.00     0.311 HD
ATOM   3695  N   VAL B  91      12.301  31.386  31.925  1.00 19.36    -0.520 N 
ATOM   3696  HN  VAL B  91      13.227  31.026  32.157  1.00  0.00     0.248 HD
ATOM   3697  CA  VAL B  91      11.410  31.949  32.940  1.00 22.25     0.201 C 
ATOM   3698  HA  VAL B  91      10.420  32.158  32.472  1.00  0.00     0.000 H 
ATOM   3699  C   VAL B  91      12.044  33.258  33.341  1.00 22.92     0.526 C 
ATOM   3700  O   VAL B  91      13.255  33.405  33.562  1.00 27.61    -0.500 OA
ATOM   3701  CB  VAL B  91      11.182  31.160  34.265  1.00 19.48     0.033 C 
ATOM   3702  HB  VAL B  91      10.233  31.524  34.723  1.00  0.00     0.000 H 
ATOM   3703  CG1 VAL B  91      10.957  29.743  33.792  1.00 26.22     0.006 C 
ATOM   3704 1HG1 VAL B  91      10.154  29.669  33.022  1.00  0.00     0.000 H 
ATOM   3705 2HG1 VAL B  91      10.752  29.062  34.651  1.00  0.00     0.000 H 
ATOM   3706 3HG1 VAL B  91      11.906  29.288  33.424  1.00  0.00     0.000 H 
ATOM   3707  CG2 VAL B  91      12.261  31.259  35.299  1.00 20.75     0.006 C 
ATOM   3708 1HG2 VAL B  91      12.427  32.305  35.648  1.00  0.00     0.000 H 
ATOM   3709 2HG2 VAL B  91      13.210  30.804  34.931  1.00  0.00     0.000 H 
ATOM   3710 3HG2 VAL B  91      12.056  30.578  36.158  1.00  0.00     0.000 H 
ATOM   3711  N   ASN B  92      11.141  34.214  33.314  1.00 20.23    -0.520 N 
ATOM   3712  HN  ASN B  92      10.189  33.983  33.028  1.00  0.00     0.248 HD
ATOM   3713  CA  ASN B  92      11.445  35.568  33.671  1.00 16.91     0.217 C 
ATOM   3714  HA  ASN B  92      12.302  35.921  33.051  1.00  0.00     0.000 H 
ATOM   3715  C   ASN B  92      11.824  35.668  35.134  1.00 15.73     0.526 C 
ATOM   3716  O   ASN B  92      11.081  35.296  36.051  1.00 14.31    -0.500 OA
ATOM   3717  CB  ASN B  92      10.246  36.461  33.407  1.00 15.62     0.003 C 
ATOM   3718  HB1 ASN B  92       9.292  35.946  33.668  1.00  0.00     0.000 H 
ATOM   3719  HB2 ASN B  92      10.198  37.301  34.138  1.00  0.00     0.000 H 
ATOM   3720  CG  ASN B  92      10.223  36.968  31.989  1.00 15.92     0.675 C 
ATOM   3721  OD1 ASN B  92      10.783  38.026  31.713  1.00 18.53    -0.470 OA
ATOM   3722  ND2 ASN B  92       9.609  36.299  31.028  1.00 12.88    -0.867 N 
ATOM   3723 1HD2 ASN B  92       9.144  35.421  31.257  1.00  0.00     0.344 HD
ATOM   3724 2HD2 ASN B  92       9.593  36.642  30.068  1.00  0.00     0.344 HD
ATOM   3725  N   LEU B  93      13.067  36.069  35.324  1.00 13.65    -0.520 N 
ATOM   3726  HN  LEU B  93      13.682  36.194  34.520  1.00  0.00     0.248 HD
ATOM   3727  CA  LEU B  93      13.574  36.335  36.658  1.00 12.64     0.204 C 
ATOM   3728  HA  LEU B  93      13.002  35.714  37.387  1.00  0.00     0.000 H 
ATOM   3729  C   LEU B  93      13.403  37.821  37.036  1.00 11.88     0.526 C 
ATOM   3730  O   LEU B  93      13.000  38.129  38.143  1.00 10.35    -0.500 OA
ATOM   3731  CB  LEU B  93      15.089  35.941  36.745  1.00  9.50     0.016 C 
ATOM   3732  HB1 LEU B  93      15.467  36.293  37.733  1.00  0.00     0.000 H 
ATOM   3733  HB2 LEU B  93      15.643  36.593  36.030  1.00  0.00     0.000 H 
ATOM   3734  CG  LEU B  93      15.596  34.518  36.546  1.00  6.43     0.054 C 
ATOM   3735  HG  LEU B  93      15.648  34.288  35.456  1.00  0.00     0.000 H 
ATOM   3736  CD1 LEU B  93      16.964  34.468  37.134  1.00  7.20    -0.014 C 
ATOM   3737 1HD1 LEU B  93      17.335  33.427  36.988  1.00  0.00     0.000 H 
ATOM   3738 2HD1 LEU B  93      17.000  34.804  38.196  1.00  0.00     0.000 H 
ATOM   3739 3HD1 LEU B  93      17.651  35.243  36.720  1.00  0.00     0.000 H 
ATOM   3740  CD2 LEU B  93      14.742  33.477  37.247  1.00  5.00    -0.014 C 
ATOM   3741 1HD2 LEU B  93      15.113  32.436  37.101  1.00  0.00     0.000 H 
ATOM   3742 2HD2 LEU B  93      13.674  33.565  36.937  1.00  0.00     0.000 H 
ATOM   3743 3HD2 LEU B  93      14.638  33.714  38.332  1.00  0.00     0.000 H 
ATOM   3744  N   LEU B  94      13.604  38.756  36.110  1.00 10.90    -0.520 N 
ATOM   3745  HN  LEU B  94      13.689  38.444  35.143  1.00  0.00     0.248 HD
ATOM   3746  CA  LEU B  94      13.712  40.176  36.358  1.00  9.82     0.204 C 
ATOM   3747  HA  LEU B  94      13.076  40.451  37.231  1.00  0.00     0.000 H 
ATOM   3748  C   LEU B  94      13.230  40.933  35.116  1.00 11.49     0.526 C 
ATOM   3749  O   LEU B  94      13.501  40.524  33.982  1.00 12.21    -0.500 OA
ATOM   3750  CB  LEU B  94      15.173  40.591  36.634  1.00  8.84     0.016 C 
ATOM   3751  HB1 LEU B  94      15.181  41.706  36.645  1.00  0.00     0.000 H 
ATOM   3752  HB2 LEU B  94      15.746  40.339  35.711  1.00  0.00     0.000 H 
ATOM   3753  CG  LEU B  94      16.040  40.150  37.804  1.00 12.82     0.054 C 
ATOM   3754  HG  LEU B  94      16.261  39.061  37.710  1.00  0.00     0.000 H 
ATOM   3755  CD1 LEU B  94      17.323  40.932  37.689  1.00 12.55    -0.014 C 
ATOM   3756 1HD1 LEU B  94      17.958  40.609  38.546  1.00  0.00     0.000 H 
ATOM   3757 2HD1 LEU B  94      17.169  42.035  37.641  1.00  0.00     0.000 H 
ATOM   3758 3HD1 LEU B  94      17.823  40.822  36.699  1.00  0.00     0.000 H 
ATOM   3759  CD2 LEU B  94      15.399  40.419  39.160  1.00 11.94    -0.014 C 
ATOM   3760 1HD2 LEU B  94      16.034  40.096  40.017  1.00  0.00     0.000 H 
ATOM   3761 2HD2 LEU B  94      14.387  39.956  39.219  1.00  0.00     0.000 H 
ATOM   3762 3HD2 LEU B  94      15.115  41.493  39.259  1.00  0.00     0.000 H 
ATOM   3763  N   SER B  95      12.661  42.117  35.232  1.00  9.82    -0.520 N 
ATOM   3764  HN  SER B  95      12.685  42.602  36.129  1.00  0.00     0.248 HD
ATOM   3765  CA  SER B  95      12.009  42.731  34.111  1.00  9.16     0.292 C 
ATOM   3766  HA  SER B  95      12.658  42.668  33.206  1.00  0.00     0.000 H 
ATOM   3767  C   SER B  95      11.741  44.179  34.463  1.00  7.79     0.526 C 
ATOM   3768  O   SER B  95      11.406  44.520  35.582  1.00  7.61    -0.500 OA
ATOM   3769  CB  SER B  95      10.626  42.125  33.816  1.00 10.97     0.194 C 
ATOM   3770  HB1 SER B  95       9.878  42.650  34.454  1.00  0.00     0.000 H 
ATOM   3771  HB2 SER B  95      10.322  42.446  32.792  1.00  0.00     0.000 H 
ATOM   3772  OG  SER B  95      10.391  40.731  33.925  1.00 15.19    -0.550 OA
ATOM   3773  HG  SER B  95       9.537  40.357  33.743  1.00  0.00     0.310 HD
ATOM   3774  N   ALA B  96      11.881  45.040  33.490  1.00  3.91    -0.520 N 
ATOM   3775  HN  ALA B  96      12.324  44.753  32.617  1.00  0.00     0.248 HD
ATOM   3776  CA  ALA B  96      11.426  46.350  33.642  1.00  2.00     0.215 C 
ATOM   3777  HA  ALA B  96      10.557  46.376  34.340  1.00  0.00     0.000 H 
ATOM   3778  C   ALA B  96      11.002  46.807  32.266  1.00  5.97     0.526 C 
ATOM   3779  O   ALA B  96      11.340  46.191  31.245  1.00  7.84    -0.500 OA
ATOM   3780  CB  ALA B  96      12.503  47.177  34.154  1.00  3.64     0.031 C 
ATOM   3781  HB1 ALA B  96      12.816  46.840  35.170  1.00  0.00     0.000 H 
ATOM   3782  HB2 ALA B  96      12.232  48.258  34.145  1.00  0.00     0.000 H 
ATOM   3783  HB3 ALA B  96      13.365  47.213  33.448  1.00  0.00     0.000 H 
ATOM   3784  N   ILE B  97      10.181  47.877  32.311  1.00  7.48    -0.520 N 
ATOM   3785  HN  ILE B  97      10.013  48.296  33.226  1.00  0.00     0.248 HD
ATOM   3786  CA  ILE B  97       9.519  48.481  31.178  1.00  7.46     0.199 C 
ATOM   3787  HA  ILE B  97      10.036  48.172  30.240  1.00  0.00     0.000 H 
ATOM   3788  C   ILE B  97       9.535  49.999  31.286  1.00  7.29     0.526 C 
ATOM   3789  O   ILE B  97       8.851  50.445  32.195  1.00  8.37    -0.500 OA
ATOM   3790  CB  ILE B  97       8.045  48.039  31.119  1.00  6.26     0.030 C 
ATOM   3791  HB  ILE B  97       7.449  48.650  31.836  1.00  0.00     0.000 H 
ATOM   3792  CG1 ILE B  97       7.824  46.591  31.404  1.00  4.37     0.017 C 
ATOM   3793 1HG1 ILE B  97       8.412  46.270  32.295  1.00  0.00     0.000 H 
ATOM   3794 2HG1 ILE B  97       8.307  45.957  30.624  1.00  0.00     0.000 H 
ATOM   3795  CG2 ILE B  97       7.590  48.351  29.690  1.00 12.33     0.001 C 
ATOM   3796 1HG2 ILE B  97       6.523  48.031  29.647  1.00  0.00     0.000 H 
ATOM   3797 2HG2 ILE B  97       8.231  47.890  28.902  1.00  0.00     0.000 H 
ATOM   3798 3HG2 ILE B  97       7.755  49.411  29.386  1.00  0.00     0.000 H 
ATOM   3799  CD1 ILE B  97       6.363  46.222  31.565  1.00 10.24    -0.001 C 
ATOM   3800 1HD1 ILE B  97       6.198  45.140  31.778  1.00  0.00     0.000 H 
ATOM   3801 2HD1 ILE B  97       5.775  46.543  30.674  1.00  0.00     0.000 H 
ATOM   3802 3HD1 ILE B  97       5.880  46.856  32.345  1.00  0.00     0.000 H 
ATOM   3803  N   LYS B  98      10.215  50.854  30.529  1.00  7.57    -0.520 N 
ATOM   3804  HN  LYS B  98      10.902  50.499  29.864  1.00  0.00     0.248 HD
ATOM   3805  CA  LYS B  98       9.993  52.297  30.636  1.00  8.22     0.227 C 
ATOM   3806  HA  LYS B  98       9.345  52.507  31.518  1.00  0.00     0.000 H 
ATOM   3807  C   LYS B  98       9.295  52.796  29.359  1.00  9.92     0.526 C 
ATOM   3808  O   LYS B  98       9.568  52.303  28.262  1.00  7.84    -0.500 OA
ATOM   3809  CB  LYS B  98      11.231  53.180  30.697  1.00  9.49     0.039 C 
ATOM   3810  HB1 LYS B  98      10.933  54.252  30.622  1.00  0.00     0.000 H 
ATOM   3811  HB2 LYS B  98      11.820  53.068  29.757  1.00  0.00     0.000 H 
ATOM   3812  CG  LYS B  98      12.118  52.989  31.868  1.00 13.18     0.053 C 
ATOM   3813  HG1 LYS B  98      12.841  52.154  31.713  1.00  0.00     0.000 H 
ATOM   3814  HG2 LYS B  98      11.570  52.569  32.743  1.00  0.00     0.000 H 
ATOM   3815  CD  LYS B  98      12.820  54.296  32.208  1.00 12.95     0.048 C 
ATOM   3816  HD1 LYS B  98      12.093  55.110  32.435  1.00  0.00     0.000 H 
ATOM   3817  HD2 LYS B  98      13.305  54.751  31.313  1.00  0.00     0.000 H 
ATOM   3818  CE  LYS B  98      13.787  54.095  33.317  1.00 12.85     0.218 C 
ATOM   3819  HE1 LYS B  98      14.441  53.212  33.131  1.00  0.00     0.000 H 
ATOM   3820  HE2 LYS B  98      13.276  53.741  34.243  1.00  0.00     0.000 H 
ATOM   3821  NZ  LYS B  98      14.568  55.287  33.568  1.00 15.42    -0.272 N 
ATOM   3822  HZ1 LYS B  98      15.232  55.149  34.330  1.00  0.00     0.311 HD
ATOM   3823  HZ2 LYS B  98      13.969  56.095  33.738  1.00  0.00     0.311 HD
ATOM   3824  HZ3 LYS B  98      15.035  55.611  32.721  1.00  0.00     0.311 HD
ATOM   3825  N   SER B  99       8.392  53.758  29.398  1.00  9.12    -0.520 N 
ATOM   3826  HN  SER B  99       8.012  54.066  30.293  1.00  0.00     0.248 HD
ATOM   3827  CA  SER B  99       7.950  54.364  28.188  1.00 11.57     0.292 C 
ATOM   3828  HA  SER B  99       8.345  53.786  27.320  1.00  0.00     0.000 H 
ATOM   3829  C   SER B  99       8.524  55.788  28.153  1.00 14.16     0.526 C 
ATOM   3830  O   SER B  99       8.199  56.601  29.008  1.00 15.43    -0.500 OA
ATOM   3831  CB  SER B  99       6.427  54.297  28.188  1.00 14.12     0.194 C 
ATOM   3832  HB1 SER B  99       6.012  54.885  27.337  1.00  0.00     0.000 H 
ATOM   3833  HB2 SER B  99       6.082  53.276  27.901  1.00  0.00     0.000 H 
ATOM   3834  OG  SER B  99       5.827  54.696  29.402  1.00 16.55    -0.550 OA
ATOM   3835  HG  SER B  99       4.878  54.654  29.402  1.00  0.00     0.310 HD
ATOM   3836  N   PRO B 100       9.419  56.150  27.224  1.00 15.31    -0.257 N 
ATOM   3837  CA  PRO B 100      10.092  57.433  27.184  1.00 19.25     0.112 C 
ATOM   3838  HA  PRO B 100      10.405  57.688  28.223  1.00  0.00     0.000 H 
ATOM   3839  C   PRO B 100       9.304  58.610  26.631  1.00 23.68     0.526 C 
ATOM   3840  O   PRO B 100       9.575  59.767  26.994  1.00 27.11    -0.500 OA
ATOM   3841  CB  PRO B 100      11.344  57.170  26.372  1.00 18.56    -0.001 C 
ATOM   3842  HB1 PRO B 100      12.237  56.864  26.965  1.00  0.00     0.000 H 
ATOM   3843  HB2 PRO B 100      11.819  58.076  25.929  1.00  0.00     0.000 H 
ATOM   3844  CG  PRO B 100      10.862  56.158  25.383  1.00 16.01     0.036 C 
ATOM   3845  HG1 PRO B 100      10.281  56.553  24.518  1.00  0.00     0.000 H 
ATOM   3846  HG2 PRO B 100      11.643  55.681  24.746  1.00  0.00     0.000 H 
ATOM   3847  CD  PRO B 100      10.115  55.238  26.327  1.00 15.62     0.084 C 
ATOM   3848  HD1 PRO B 100      10.759  54.488  26.843  1.00  0.00     0.000 H 
ATOM   3849  HD2 PRO B 100       9.453  54.498  25.820  1.00  0.00     0.000 H 
ATOM   3850  N   CYS B 101       8.402  58.302  25.680  1.00 26.61    -0.520 N 
ATOM   3851  HN  CYS B 101       8.270  57.321  25.434  1.00  0.00     0.248 HD
ATOM   3852  CA  CYS B 101       7.596  59.319  24.978  1.00 26.40     0.088 C 
ATOM   3853  HA  CYS B 101       8.048  60.325  25.141  1.00  0.00     0.000 H 
ATOM   3854  C   CYS B 101       6.177  59.318  25.498  1.00 27.50     0.526 C 
ATOM   3855  O   CYS B 101       5.568  58.267  25.352  1.00 27.80    -0.500 OA
ATOM   3856  CB  CYS B 101       7.488  59.045  23.449  1.00 24.48     0.143 C 
ATOM   3857  HB1 CYS B 101       6.810  59.800  22.987  1.00  0.00     0.000 H 
ATOM   3858  HB2 CYS B 101       6.905  58.109  23.283  1.00  0.00     0.000 H 
ATOM   3859  SG  CYS B 101       9.017  58.966  22.509  1.00 18.64     0.015 SA
ATOM   3860  N   GLN B 102       5.543  60.288  26.122  1.00 34.30    -0.520 N 
ATOM   3861  HN  GLN B 102       6.057  61.123  26.402  1.00  0.00     0.248 HD
ATOM   3862  CA  GLN B 102       4.114  60.190  26.421  1.00 43.38     0.210 C 
ATOM   3863  HA  GLN B 102       3.635  59.348  25.869  1.00  0.00     0.000 H 
ATOM   3864  C   GLN B 102       3.678  61.522  25.885  1.00 47.62     0.526 C 
ATOM   3865  O   GLN B 102       3.825  62.577  26.512  1.00 48.31    -0.500 OA
ATOM   3866  CB  GLN B 102       3.824  60.121  27.903  1.00 46.73     0.053 C 
ATOM   3867  HB1 GLN B 102       2.887  60.683  28.126  1.00  0.00     0.000 H 
ATOM   3868  HB2 GLN B 102       4.570  60.737  28.458  1.00  0.00     0.000 H 
ATOM   3869  CG  GLN B 102       3.746  58.732  28.526  1.00 47.91    -0.043 C 
ATOM   3870  HG1 GLN B 102       4.473  58.003  28.099  1.00  0.00     0.000 H 
ATOM   3871  HG2 GLN B 102       2.825  58.166  28.255  1.00  0.00     0.000 H 
ATOM   3872  CD  GLN B 102       3.910  58.963  30.013  1.00 50.31     0.675 C 
ATOM   3873  OE1 GLN B 102       2.960  59.336  30.707  1.00 49.56    -0.470 OA
ATOM   3874  NE2 GLN B 102       5.121  58.767  30.550  1.00 51.38    -0.867 N 
ATOM   3875 1HE2 GLN B 102       5.232  58.923  31.552  1.00  0.00     0.344 HD
ATOM   3876 2HE2 GLN B 102       5.906  58.459  29.976  1.00  0.00     0.344 HD
ATOM   3877  N   ARG B 103       3.307  61.343  24.603  1.00 52.92    -0.520 N 
ATOM   3878  HN  ARG B 103       3.167  60.386  24.280  1.00  0.00     0.248 HD
ATOM   3879  CA  ARG B 103       3.090  62.428  23.636  1.00 56.65     0.237 C 
ATOM   3880  HA  ARG B 103       2.783  61.981  22.662  1.00  0.00     0.000 H 
ATOM   3881  C   ARG B 103       4.415  63.219  23.426  1.00 58.23     0.526 C 
ATOM   3882  O   ARG B 103       5.412  62.965  24.113  1.00 61.27    -0.500 OA
ATOM   3883  CB  ARG B 103       1.928  63.294  24.171  1.00 57.05     0.049 C 
ATOM   3884  HB1 ARG B 103       1.959  63.290  25.286  1.00  0.00     0.000 H 
ATOM   3885  HB2 ARG B 103       0.966  62.764  23.980  1.00  0.00     0.000 H 
ATOM   3886  CG  ARG B 103       1.801  64.746  23.682  1.00 58.89     0.058 C 
ATOM   3887  HG1 ARG B 103       0.949  65.246  24.199  1.00  0.00     0.000 H 
ATOM   3888  HG2 ARG B 103       2.654  65.351  24.069  1.00  0.00     0.000 H 
ATOM   3889  CD  ARG B 103       1.673  64.937  22.161  1.00 56.61     0.111 C 
ATOM   3890  HD1 ARG B 103       2.625  64.735  21.617  1.00  0.00     0.000 H 
ATOM   3891  HD2 ARG B 103       1.056  64.146  21.675  1.00  0.00     0.000 H 
ATOM   3892  NE  ARG B 103       1.163  66.271  21.927  1.00 55.14    -0.493 N 
ATOM   3893  HE  ARG B 103       1.807  67.056  21.829  1.00  0.00     0.294 HD
ATOM   3894  CZ  ARG B 103      -0.164  66.470  21.840  1.00 55.10     0.814 C 
ATOM   3895  NH1 ARG B 103      -0.646  67.711  21.707  1.00 54.90    -0.634 N 
ATOM   3896 1HH1 ARG B 103       0.015  68.487  21.696  1.00  0.00     0.361 HD
ATOM   3897 2HH1 ARG B 103      -1.653  67.862  21.641  1.00  0.00     0.361 HD
ATOM   3898  NH2 ARG B 103      -1.033  65.450  21.855  1.00 55.14    -0.634 N 
ATOM   3899 1HH2 ARG B 103      -0.666  64.504  21.956  1.00  0.00     0.361 HD
ATOM   3900 2HH2 ARG B 103      -2.040  65.601  21.789  1.00  0.00     0.361 HD
ATOM   3901  N   GLU B 104       4.540  64.023  22.370  1.00 60.55    -0.520 N 
ATOM   3902  HN  GLU B 104       3.790  63.973  21.681  1.00  0.00     0.248 HD
ATOM   3903  CA  GLU B 104       5.627  64.976  22.072  1.00 62.45     0.246 C 
ATOM   3904  HA  GLU B 104       5.409  65.975  22.518  1.00  0.00     0.000 H 
ATOM   3905  C   GLU B 104       5.549  65.036  20.542  1.00 63.35     0.526 C 
ATOM   3906  O   GLU B 104       5.566  66.140  19.976  1.00 65.04    -0.500 OA
ATOM   3907  CB  GLU B 104       7.087  64.524  22.412  1.00 63.55     0.000 C 
ATOM   3908  HB1 GLU B 104       7.075  63.463  22.756  1.00  0.00     0.000 H 
ATOM   3909  HB2 GLU B 104       7.674  64.431  21.469  1.00  0.00     0.000 H 
ATOM   3910  CG  GLU B 104       7.877  65.380  23.423  1.00 63.90    -0.208 C 
ATOM   3911  HG1 GLU B 104       8.623  64.732  23.940  1.00  0.00     0.000 H 
ATOM   3912  HG2 GLU B 104       7.204  65.652  24.269  1.00  0.00     0.000 H 
ATOM   3913  CD  GLU B 104       8.588  66.657  22.919  1.00 63.44     0.620 C 
ATOM   3914  OE1 GLU B 104       7.933  67.704  22.770  1.00 62.55    -0.706 OA
ATOM   3915  OE2 GLU B 104       9.808  66.596  22.701  1.00 61.79    -0.706 OA
ATOM   3916  N   THR B 105       5.541  63.872  19.851  1.00 60.16    -0.520 N 
ATOM   3917  HN  THR B 105       5.750  63.008  20.350  1.00  0.00     0.248 HD
ATOM   3918  CA  THR B 105       5.245  63.798  18.418  1.00 59.63     0.268 C 
ATOM   3919  HA  THR B 105       5.600  62.804  18.059  1.00  0.00     0.000 H 
ATOM   3920  C   THR B 105       5.886  64.878  17.492  1.00 58.44     0.526 C 
ATOM   3921  O   THR B 105       5.269  65.392  16.530  1.00 55.72    -0.500 OA
ATOM   3922  CB  THR B 105       3.676  63.811  18.277  1.00 60.40     0.211 C 
ATOM   3923  HB  THR B 105       3.365  64.819  17.915  1.00  0.00     0.000 H 
ATOM   3924  OG1 THR B 105       3.054  63.577  19.560  1.00 60.68    -0.550 OA
ATOM   3925  HG1 THR B 105       3.322  64.222  20.204  1.00  0.00     0.310 HD
ATOM   3926  CG2 THR B 105       3.240  62.762  17.230  1.00 61.57     0.007 C 
ATOM   3927 1HG2 THR B 105       3.720  62.943  16.240  1.00  0.00     0.000 H 
ATOM   3928 2HG2 THR B 105       2.130  62.714  17.141  1.00  0.00     0.000 H 
ATOM   3929 3HG2 THR B 105       3.430  61.724  17.591  1.00  0.00     0.000 H 
ATOM   3930  N   PRO B 106       7.124  65.299  17.785  1.00 56.88    -0.257 N 
ATOM   3931  CA  PRO B 106       7.519  66.702  17.604  1.00 56.95     0.112 C 
ATOM   3932  HA  PRO B 106       6.772  67.326  18.149  1.00  0.00     0.000 H 
ATOM   3933  C   PRO B 106       7.610  67.257  16.157  1.00 55.91     0.526 C 
ATOM   3934  O   PRO B 106       8.672  67.339  15.515  1.00 55.11    -0.500 OA
ATOM   3935  CB  PRO B 106       8.795  66.713  18.426  1.00 55.84    -0.001 C 
ATOM   3936  HB1 PRO B 106       8.981  67.683  18.944  1.00  0.00     0.000 H 
ATOM   3937  HB2 PRO B 106       9.722  66.710  17.807  1.00  0.00     0.000 H 
ATOM   3938  CG  PRO B 106       8.696  65.523  19.379  1.00 53.87     0.036 C 
ATOM   3939  HG1 PRO B 106       9.630  65.249  19.923  1.00  0.00     0.000 H 
ATOM   3940  HG2 PRO B 106       8.104  65.686  20.310  1.00  0.00     0.000 H 
ATOM   3941  CD  PRO B 106       8.164  64.503  18.430  1.00 54.89     0.084 C 
ATOM   3942  HD1 PRO B 106       8.910  64.028  17.751  1.00  0.00     0.000 H 
ATOM   3943  HD2 PRO B 106       7.835  63.538  18.881  1.00  0.00     0.000 H 
ATOM   3944  N   GLU B 107       6.415  67.734  15.747  1.00 54.92    -0.520 N 
ATOM   3945  HN  GLU B 107       5.683  67.789  16.455  1.00  0.00     0.248 HD
ATOM   3946  CA  GLU B 107       6.048  68.185  14.390  1.00 52.56     0.246 C 
ATOM   3947  HA  GLU B 107       6.112  67.281  13.740  1.00  0.00     0.000 H 
ATOM   3948  C   GLU B 107       6.822  69.276  13.665  1.00 48.18     0.526 C 
ATOM   3949  O   GLU B 107       7.464  69.036  12.646  1.00 45.24    -0.500 OA
ATOM   3950  CB  GLU B 107       4.551  68.572  14.432  1.00 52.75     0.000 C 
ATOM   3951  HB1 GLU B 107       4.396  69.536  14.971  1.00  0.00     0.000 H 
ATOM   3952  HB2 GLU B 107       3.977  67.898  15.110  1.00  0.00     0.000 H 
ATOM   3953  CG  GLU B 107       3.936  68.611  13.036  1.00 53.95    -0.208 C 
ATOM   3954  HG1 GLU B 107       3.046  67.942  12.968  1.00  0.00     0.000 H 
ATOM   3955  HG2 GLU B 107       4.594  68.106  12.291  1.00  0.00     0.000 H 
ATOM   3956  CD  GLU B 107       3.594  70.031  12.598  1.00 55.26     0.620 C 
ATOM   3957  OE1 GLU B 107       2.431  70.423  12.767  1.00 56.07    -0.706 OA
ATOM   3958  OE2 GLU B 107       4.487  70.729  12.095  1.00 54.38    -0.706 OA
ATOM   3959  N   GLY B 108       6.685  70.517  14.113  1.00 45.86    -0.520 N 
ATOM   3960  HN  GLY B 108       6.003  70.701  14.849  1.00  0.00     0.248 HD
ATOM   3961  CA  GLY B 108       7.472  71.626  13.594  1.00 43.18     0.246 C 
ATOM   3962  HA1 GLY B 108       6.899  72.581  13.543  1.00  0.00     0.000 H 
ATOM   3963  HA2 GLY B 108       7.692  71.532  12.505  1.00  0.00     0.000 H 
ATOM   3964  C   GLY B 108       8.731  71.730  14.451  1.00 41.05     0.526 C 
ATOM   3965  O   GLY B 108       9.051  72.793  15.003  1.00 35.54    -0.500 OA
ATOM   3966  N   ALA B 109       9.435  70.595  14.519  1.00 39.33    -0.520 N 
ATOM   3967  HN  ALA B 109       9.197  69.796  13.931  1.00  0.00     0.248 HD
ATOM   3968  CA  ALA B 109      10.532  70.528  15.438  1.00 46.50     0.215 C 
ATOM   3969  HA  ALA B 109      10.907  71.570  15.572  1.00  0.00     0.000 H 
ATOM   3970  C   ALA B 109      11.746  69.657  15.109  1.00 49.36     0.526 C 
ATOM   3971  O   ALA B 109      12.902  70.096  15.297  1.00 49.42    -0.500 OA
ATOM   3972  CB  ALA B 109      10.002  70.068  16.798  1.00 47.26     0.031 C 
ATOM   3973  HB1 ALA B 109       9.117  70.703  17.038  1.00  0.00     0.000 H 
ATOM   3974  HB2 ALA B 109      10.779  70.082  17.597  1.00  0.00     0.000 H 
ATOM   3975  HB3 ALA B 109       9.779  68.976  16.834  1.00  0.00     0.000 H 
ATOM   3976  N   GLU B 110      11.495  68.397  14.703  1.00 49.46    -0.520 N 
ATOM   3977  HN  GLU B 110      10.524  68.137  14.531  1.00  0.00     0.248 HD
ATOM   3978  CA  GLU B 110      12.529  67.371  14.491  1.00 49.10     0.246 C 
ATOM   3979  HA  GLU B 110      12.062  66.503  13.970  1.00  0.00     0.000 H 
ATOM   3980  C   GLU B 110      13.050  66.892  15.870  1.00 46.16     0.526 C 
ATOM   3981  O   GLU B 110      13.539  65.766  15.974  1.00 46.84    -0.500 OA
ATOM   3982  CB  GLU B 110      13.719  67.901  13.606  1.00 49.89     0.000 C 
ATOM   3983  HB1 GLU B 110      14.687  67.664  14.106  1.00  0.00     0.000 H 
ATOM   3984  HB2 GLU B 110      13.736  69.015  13.637  1.00  0.00     0.000 H 
ATOM   3985  CG  GLU B 110      13.771  67.431  12.146  1.00 47.87    -0.208 C 
ATOM   3986  HG1 GLU B 110      12.824  66.921  11.852  1.00  0.00     0.000 H 
ATOM   3987  HG2 GLU B 110      13.733  68.295  11.442  1.00  0.00     0.000 H 
ATOM   3988  CD  GLU B 110      14.994  66.539  11.868  1.00 48.31     0.620 C 
ATOM   3989  OE1 GLU B 110      15.041  65.402  12.376  1.00 48.20    -0.706 OA
ATOM   3990  OE2 GLU B 110      15.903  66.985  11.150  1.00 44.88    -0.706 OA
ATOM   3991  N   ALA B 111      12.996  67.708  16.934  1.00 41.81    -0.520 N 
ATOM   3992  HN  ALA B 111      12.882  68.710  16.778  1.00  0.00     0.248 HD
ATOM   3993  CA  ALA B 111      13.093  67.220  18.300  1.00 41.45     0.215 C 
ATOM   3994  HA  ALA B 111      12.726  68.067  18.925  1.00  0.00     0.000 H 
ATOM   3995  C   ALA B 111      14.333  66.715  19.032  1.00 41.01     0.526 C 
ATOM   3996  O   ALA B 111      15.386  66.255  18.539  1.00 42.83    -0.500 OA
ATOM   3997  CB  ALA B 111      12.076  66.120  18.517  1.00 42.78     0.031 C 
ATOM   3998  HB1 ALA B 111      12.150  65.746  19.565  1.00  0.00     0.000 H 
ATOM   3999  HB2 ALA B 111      12.177  65.300  17.769  1.00  0.00     0.000 H 
ATOM   4000  HB3 ALA B 111      11.041  66.446  18.259  1.00  0.00     0.000 H 
ATOM   4001  N   LYS B 112      14.067  66.783  20.340  1.00 36.49    -0.520 N 
ATOM   4002  HN  LYS B 112      13.128  67.022  20.659  1.00  0.00     0.248 HD
ATOM   4003  CA  LYS B 112      15.112  66.517  21.299  1.00 30.61     0.227 C 
ATOM   4004  HA  LYS B 112      16.069  66.925  20.899  1.00  0.00     0.000 H 
ATOM   4005  C   LYS B 112      15.287  65.029  21.534  1.00 26.09     0.526 C 
ATOM   4006  O   LYS B 112      14.335  64.240  21.434  1.00 25.22    -0.500 OA
ATOM   4007  CB  LYS B 112      14.791  67.233  22.599  1.00 28.91     0.039 C 
ATOM   4008  HB1 LYS B 112      15.407  66.817  23.431  1.00  0.00     0.000 H 
ATOM   4009  HB2 LYS B 112      13.772  66.952  22.953  1.00  0.00     0.000 H 
ATOM   4010  CG  LYS B 112      14.930  68.741  22.547  1.00 28.86     0.053 C 
ATOM   4011  HG1 LYS B 112      15.249  69.173  23.524  1.00  0.00     0.000 H 
ATOM   4012  HG2 LYS B 112      15.806  69.067  21.940  1.00  0.00     0.000 H 
ATOM   4013  CD  LYS B 112      13.612  69.342  22.043  1.00 30.29     0.048 C 
ATOM   4014  HD1 LYS B 112      13.234  68.783  21.155  1.00  0.00     0.000 H 
ATOM   4015  HD2 LYS B 112      12.781  69.134  22.757  1.00  0.00     0.000 H 
ATOM   4016  CE  LYS B 112      13.711  70.823  21.747  1.00 26.33     0.218 C 
ATOM   4017  HE1 LYS B 112      13.923  71.423  22.662  1.00  0.00     0.000 H 
ATOM   4018  HE2 LYS B 112      12.722  71.270  21.490  1.00  0.00     0.000 H 
ATOM   4019  NZ  LYS B 112      14.695  71.039  20.710  1.00 26.59    -0.272 N 
ATOM   4020  HZ1 LYS B 112      14.762  72.037  20.511  1.00  0.00     0.311 HD
ATOM   4021  HZ2 LYS B 112      14.501  70.490  19.873  1.00  0.00     0.311 HD
ATOM   4022  HZ3 LYS B 112      15.600  70.631  20.945  1.00  0.00     0.311 HD
ATOM   4023  N   PRO B 113      16.539  64.645  21.805  1.00 22.87    -0.257 N 
ATOM   4024  CA  PRO B 113      16.866  63.310  22.276  1.00 21.61     0.112 C 
ATOM   4025  HA  PRO B 113      16.236  62.593  21.699  1.00  0.00     0.000 H 
ATOM   4026  C   PRO B 113      16.666  62.986  23.791  1.00 20.84     0.526 C 
ATOM   4027  O   PRO B 113      17.031  63.742  24.711  1.00 19.02    -0.500 OA
ATOM   4028  CB  PRO B 113      18.270  63.214  21.725  1.00 20.27    -0.001 C 
ATOM   4029  HB1 PRO B 113      18.313  62.869  20.666  1.00  0.00     0.000 H 
ATOM   4030  HB2 PRO B 113      18.866  62.378  22.160  1.00  0.00     0.000 H 
ATOM   4031  CG  PRO B 113      18.884  64.573  21.944  1.00 17.65     0.036 C 
ATOM   4032  HG1 PRO B 113      19.292  64.764  22.964  1.00  0.00     0.000 H 
ATOM   4033  HG2 PRO B 113      19.853  64.758  21.425  1.00  0.00     0.000 H 
ATOM   4034  CD  PRO B 113      17.740  65.446  21.524  1.00 21.12     0.084 C 
ATOM   4035  HD1 PRO B 113      17.737  66.453  22.003  1.00  0.00     0.000 H 
ATOM   4036  HD2 PRO B 113      17.808  65.809  20.472  1.00  0.00     0.000 H 
ATOM   4037  N   TRP B 114      16.000  61.875  24.095  1.00 17.43    -0.520 N 
ATOM   4038  HN  TRP B 114      15.593  61.326  23.338  1.00  0.00     0.248 HD
ATOM   4039  CA  TRP B 114      15.829  61.412  25.460  1.00 14.88     0.248 C 
ATOM   4040  HA  TRP B 114      16.020  62.257  26.162  1.00  0.00     0.000 H 
ATOM   4041  C   TRP B 114      16.830  60.300  25.728  1.00 16.49     0.526 C 
ATOM   4042  O   TRP B 114      17.476  59.784  24.816  1.00 18.10    -0.500 OA
ATOM   4043  CB  TRP B 114      14.438  60.884  25.683  1.00 12.20     0.020 C 
ATOM   4044  HB1 TRP B 114      13.737  61.724  25.898  1.00  0.00     0.000 H 
ATOM   4045  HB2 TRP B 114      14.385  60.335  26.652  1.00  0.00     0.000 H 
ATOM   4046  CG  TRP B 114      13.891  60.016  24.554  1.00 11.89     0.046 A 
ATOM   4047  CD1 TRP B 114      13.150  60.523  23.504  1.00  8.99     0.117 A 
ATOM   4048  HD1 TRP B 114      12.847  61.570  23.337  1.00  0.00     0.000 H 
ATOM   4049  CD2 TRP B 114      14.089  58.671  24.461  1.00 10.90    -0.275 A 
ATOM   4050  NE1 TRP B 114      12.890  59.498  22.761  1.00  7.31    -0.330 N 
ATOM   4051  HE1 TRP B 114      12.351  59.533  21.896  1.00  0.00     0.294 HD
ATOM   4052  CE2 TRP B 114      13.427  58.376  23.283  1.00 10.15     0.000 A 
ATOM   4053  CE3 TRP B 114      14.738  57.702  25.196  1.00 11.00     0.145 A 
ATOM   4054  HE3 TRP B 114      15.270  57.950  26.130  1.00  0.00     0.000 H 
ATOM   4055  CZ2 TRP B 114      13.393  57.073  22.828  1.00  6.60     0.029 A 
ATOM   4056  HZ2 TRP B 114      12.858  56.812  21.900  1.00  0.00     0.000 H 
ATOM   4057  CZ3 TRP B 114      14.695  56.423  24.721  1.00 10.76    -0.082 A 
ATOM   4058  HZ3 TRP B 114      15.198  55.618  25.283  1.00  0.00     0.000 H 
ATOM   4059  CH2 TRP B 114      14.034  56.122  23.551  1.00  6.40     0.034 A 
ATOM   4060  HH2 TRP B 114      14.026  55.079  23.192  1.00  0.00     0.000 H 
ATOM   4061  N   TYR B 115      17.050  59.943  26.973  1.00 16.22    -0.520 N 
ATOM   4062  HN  TYR B 115      16.620  60.483  27.724  1.00  0.00     0.248 HD
ATOM   4063  CA  TYR B 115      17.880  58.811  27.314  1.00 14.86     0.245 C 
ATOM   4064  HA  TYR B 115      18.025  58.139  26.437  1.00  0.00     0.000 H 
ATOM   4065  C   TYR B 115      17.073  58.134  28.392  1.00 13.37     0.526 C 
ATOM   4066  O   TYR B 115      16.387  58.824  29.162  1.00 14.56    -0.500 OA
ATOM   4067  CB  TYR B 115      19.164  59.207  27.895  1.00 14.11     0.022 C 
ATOM   4068  HB1 TYR B 115      19.640  58.364  28.448  1.00  0.00     0.000 H 
ATOM   4069  HB2 TYR B 115      19.027  59.914  28.746  1.00  0.00     0.000 H 
ATOM   4070  CG  TYR B 115      20.077  59.767  26.860  1.00 17.66    -0.001 A 
ATOM   4071  CD1 TYR B 115      19.995  61.126  26.571  1.00 21.75    -0.035 A 
ATOM   4072  HD1 TYR B 115      19.191  61.728  27.028  1.00  0.00     0.000 H 
ATOM   4073  CD2 TYR B 115      21.052  58.975  26.299  1.00 17.89    -0.035 A 
ATOM   4074  HD2 TYR B 115      21.105  57.894  26.511  1.00  0.00     0.000 H 
ATOM   4075  CE1 TYR B 115      20.899  61.737  25.724  1.00 22.07     0.100 A 
ATOM   4076  HE1 TYR B 115      20.821  62.814  25.500  1.00  0.00     0.000 H 
ATOM   4077  CE2 TYR B 115      21.971  59.595  25.451  1.00 23.26     0.100 A 
ATOM   4078  HE2 TYR B 115      22.773  58.991  24.994  1.00  0.00     0.000 H 
ATOM   4079  CZ  TYR B 115      21.900  60.973  25.164  1.00 23.55    -0.121 A 
ATOM   4080  OH  TYR B 115      22.859  61.593  24.354  1.00 24.75    -0.368 OA
ATOM   4081  HH  TYR B 115      23.549  61.066  23.968  1.00  0.00     0.339 HD
ATOM   4082  N   GLU B 116      17.172  56.819  28.494  1.00 11.19    -0.520 N 
ATOM   4083  HN  GLU B 116      17.875  56.331  27.939  1.00  0.00     0.248 HD
ATOM   4084  CA  GLU B 116      16.318  56.059  29.364  1.00  9.21     0.246 C 
ATOM   4085  HA  GLU B 116      15.972  56.681  30.223  1.00  0.00     0.000 H 
ATOM   4086  C   GLU B 116      17.149  54.917  29.837  1.00  9.79     0.526 C 
ATOM   4087  O   GLU B 116      17.407  54.092  28.949  1.00 15.15    -0.500 OA
ATOM   4088  CB  GLU B 116      15.156  55.616  28.524  1.00 10.20     0.000 C 
ATOM   4089  HB1 GLU B 116      15.120  56.192  27.570  1.00  0.00     0.000 H 
ATOM   4090  HB2 GLU B 116      15.332  54.592  28.119  1.00  0.00     0.000 H 
ATOM   4091  CG  GLU B 116      13.860  55.682  29.218  1.00 17.12    -0.208 C 
ATOM   4092  HG1 GLU B 116      13.036  55.352  28.543  1.00  0.00     0.000 H 
ATOM   4093  HG2 GLU B 116      13.792  54.889  29.999  1.00  0.00     0.000 H 
ATOM   4094  CD  GLU B 116      13.552  57.042  29.810  1.00 22.09     0.620 C 
ATOM   4095  OE1 GLU B 116      12.876  57.861  29.171  1.00 22.30    -0.706 OA
ATOM   4096  OE2 GLU B 116      13.948  57.255  30.955  1.00 29.25    -0.706 OA
ATOM   4097  N   PRO B 117      17.707  54.795  31.057  1.00 11.50    -0.257 N 
ATOM   4098  CA  PRO B 117      18.430  53.574  31.426  1.00 10.73     0.112 C 
ATOM   4099  HA  PRO B 117      18.814  53.096  30.495  1.00  0.00     0.000 H 
ATOM   4100  C   PRO B 117      17.583  52.573  32.159  1.00  7.76     0.526 C 
ATOM   4101  O   PRO B 117      16.577  53.009  32.696  1.00  7.89    -0.500 OA
ATOM   4102  CB  PRO B 117      19.611  54.041  32.247  1.00  7.14    -0.001 C 
ATOM   4103  HB1 PRO B 117      20.054  53.266  32.915  1.00  0.00     0.000 H 
ATOM   4104  HB2 PRO B 117      20.543  54.227  31.665  1.00  0.00     0.000 H 
ATOM   4105  CG  PRO B 117      19.068  55.218  32.939  1.00  8.27     0.036 C 
ATOM   4106  HG1 PRO B 117      19.819  55.859  33.456  1.00  0.00     0.000 H 
ATOM   4107  HG2 PRO B 117      18.476  55.003  33.859  1.00  0.00     0.000 H 
ATOM   4108  CD  PRO B 117      18.306  55.885  31.815  1.00 11.07     0.084 C 
ATOM   4109  HD1 PRO B 117      17.571  56.649  32.161  1.00  0.00     0.000 H 
ATOM   4110  HD2 PRO B 117      18.928  56.574  31.197  1.00  0.00     0.000 H 
ATOM   4111  N   ILE B 118      17.905  51.278  32.180  1.00  7.65    -0.520 N 
ATOM   4112  HN  ILE B 118      18.657  50.941  31.579  1.00  0.00     0.248 HD
ATOM   4113  CA  ILE B 118      17.201  50.331  33.048  1.00  9.62     0.199 C 
ATOM   4114  HA  ILE B 118      16.736  50.904  33.884  1.00  0.00     0.000 H 
ATOM   4115  C   ILE B 118      18.147  49.294  33.650  1.00 13.84     0.526 C 
ATOM   4116  O   ILE B 118      18.845  48.507  32.958  1.00 17.24    -0.500 OA
ATOM   4117  CB  ILE B 118      16.062  49.562  32.289  1.00 10.03     0.030 C 
ATOM   4118  HB  ILE B 118      16.501  48.978  31.447  1.00  0.00     0.000 H 
ATOM   4119  CG1 ILE B 118      14.987  50.500  31.756  1.00  7.09     0.017 C 
ATOM   4120 1HG1 ILE B 118      15.422  51.471  31.424  1.00  0.00     0.000 H 
ATOM   4121 2HG1 ILE B 118      14.331  50.875  32.576  1.00  0.00     0.000 H 
ATOM   4122  CG2 ILE B 118      15.376  48.622  33.258  1.00  6.05     0.001 C 
ATOM   4123 1HG2 ILE B 118      16.163  47.935  33.648  1.00  0.00     0.000 H 
ATOM   4124 2HG2 ILE B 118      14.506  48.086  32.811  1.00  0.00     0.000 H 
ATOM   4125 3HG2 ILE B 118      14.815  49.152  34.063  1.00  0.00     0.000 H 
ATOM   4126  CD1 ILE B 118      14.177  49.851  30.652  1.00  7.57    -0.001 C 
ATOM   4127 1HD1 ILE B 118      13.390  50.538  30.262  1.00  0.00     0.000 H 
ATOM   4128 2HD1 ILE B 118      13.742  48.880  30.984  1.00  0.00     0.000 H 
ATOM   4129 3HD1 ILE B 118      14.833  49.476  29.832  1.00  0.00     0.000 H 
ATOM   4130  N   TYR B 119      18.068  49.291  34.988  1.00 14.43    -0.520 N 
ATOM   4131  HN  TYR B 119      17.419  49.933  35.443  1.00  0.00     0.248 HD
ATOM   4132  CA  TYR B 119      18.871  48.408  35.814  1.00 12.71     0.245 C 
ATOM   4133  HA  TYR B 119      19.659  47.936  35.181  1.00  0.00     0.000 H 
ATOM   4134  C   TYR B 119      17.992  47.311  36.412  1.00 12.55     0.526 C 
ATOM   4135  O   TYR B 119      16.858  47.479  36.862  1.00 15.46    -0.500 OA
ATOM   4136  CB  TYR B 119      19.534  49.197  36.914  1.00  8.30     0.022 C 
ATOM   4137  HB1 TYR B 119      19.880  50.192  36.550  1.00  0.00     0.000 H 
ATOM   4138  HB2 TYR B 119      18.793  49.539  37.674  1.00  0.00     0.000 H 
ATOM   4139  CG  TYR B 119      20.662  48.418  37.552  1.00  6.16    -0.001 A 
ATOM   4140  CD1 TYR B 119      21.972  48.735  37.247  1.00 10.45    -0.035 A 
ATOM   4141  HD1 TYR B 119      22.177  49.557  36.541  1.00  0.00     0.000 H 
ATOM   4142  CD2 TYR B 119      20.389  47.409  38.425  1.00  6.33    -0.035 A 
ATOM   4143  HD2 TYR B 119      19.346  47.159  38.682  1.00  0.00     0.000 H 
ATOM   4144  CE1 TYR B 119      23.029  48.047  37.806  1.00 10.02     0.100 A 
ATOM   4145  HE1 TYR B 119      24.073  48.310  37.565  1.00  0.00     0.000 H 
ATOM   4146  CE2 TYR B 119      21.425  46.711  38.978  1.00 10.66     0.100 A 
ATOM   4147  HE2 TYR B 119      21.211  45.886  39.678  1.00  0.00     0.000 H 
ATOM   4148  CZ  TYR B 119      22.736  47.021  38.675  1.00 10.74    -0.121 A 
ATOM   4149  OH  TYR B 119      23.741  46.274  39.241  1.00 10.24    -0.368 OA
ATOM   4150  HH  TYR B 119      24.643  46.487  39.033  1.00  0.00     0.339 HD
ATOM   4151  N   LEU B 120      18.617  46.155  36.431  1.00 15.55    -0.520 N 
ATOM   4152  HN  LEU B 120      19.573  46.132  36.076  1.00  0.00     0.248 HD
ATOM   4153  CA  LEU B 120      18.058  44.915  36.914  1.00 14.59     0.204 C 
ATOM   4154  HA  LEU B 120      17.125  45.118  37.490  1.00  0.00     0.000 H 
ATOM   4155  C   LEU B 120      19.099  44.221  37.825  1.00 17.03     0.526 C 
ATOM   4156  O   LEU B 120      20.248  44.013  37.407  1.00 19.56    -0.500 OA
ATOM   4157  CB  LEU B 120      17.727  44.164  35.647  1.00 12.08     0.016 C 
ATOM   4158  HB1 LEU B 120      18.345  43.236  35.626  1.00  0.00     0.000 H 
ATOM   4159  HB2 LEU B 120      18.145  44.739  34.788  1.00  0.00     0.000 H 
ATOM   4160  CG  LEU B 120      16.301  43.782  35.304  1.00 15.33     0.054 C 
ATOM   4161  HG  LEU B 120      15.998  42.903  35.919  1.00  0.00     0.000 H 
ATOM   4162  CD1 LEU B 120      15.261  44.861  35.437  1.00 13.71    -0.014 C 
ATOM   4163 1HD1 LEU B 120      15.179  45.171  36.505  1.00  0.00     0.000 H 
ATOM   4164 2HD1 LEU B 120      14.278  44.552  35.012  1.00  0.00     0.000 H 
ATOM   4165 3HD1 LEU B 120      15.463  45.725  34.762  1.00  0.00     0.000 H 
ATOM   4166  CD2 LEU B 120      16.413  43.358  33.845  1.00 18.63    -0.014 C 
ATOM   4167 1HD2 LEU B 120      17.184  42.558  33.746  1.00  0.00     0.000 H 
ATOM   4168 2HD2 LEU B 120      16.615  44.222  33.170  1.00  0.00     0.000 H 
ATOM   4169 3HD2 LEU B 120      15.430  43.049  33.420  1.00  0.00     0.000 H 
ATOM   4170  N   GLY B 121      18.823  43.903  39.095  1.00 14.18    -0.520 N 
ATOM   4171  HN  GLY B 121      17.930  44.177  39.505  1.00  0.00     0.248 HD
ATOM   4172  CA  GLY B 121      19.779  43.177  39.883  1.00  8.52     0.246 C 
ATOM   4173  HA1 GLY B 121      20.560  43.830  40.339  1.00  0.00     0.000 H 
ATOM   4174  HA2 GLY B 121      20.464  42.545  39.271  1.00  0.00     0.000 H 
ATOM   4175  C   GLY B 121      18.992  42.388  40.903  1.00 12.37     0.526 C 
ATOM   4176  O   GLY B 121      18.123  42.976  41.580  1.00 11.25    -0.500 OA
ATOM   4177  N   GLY B 122      19.282  41.084  41.023  1.00 12.56    -0.520 N 
ATOM   4178  HN  GLY B 122      19.962  40.676  40.382  1.00  0.00     0.248 HD
ATOM   4179  CA  GLY B 122      18.666  40.218  42.034  1.00 15.56     0.246 C 
ATOM   4180  HA1 GLY B 122      18.372  40.813  42.930  1.00  0.00     0.000 H 
ATOM   4181  HA2 GLY B 122      17.660  39.877  41.694  1.00  0.00     0.000 H 
ATOM   4182  C   GLY B 122      19.530  39.013  42.449  1.00 16.87     0.526 C 
ATOM   4183  O   GLY B 122      20.578  38.722  41.848  1.00 18.25    -0.500 OA
ATOM   4184  N   VAL B 123      19.147  38.314  43.514  1.00 13.82    -0.520 N 
ATOM   4185  HN  VAL B 123      18.337  38.620  44.053  1.00  0.00     0.248 HD
ATOM   4186  CA  VAL B 123      19.870  37.116  43.921  1.00 16.60     0.201 C 
ATOM   4187  HA  VAL B 123      20.806  37.021  43.323  1.00  0.00     0.000 H 
ATOM   4188  C   VAL B 123      18.929  35.984  43.576  1.00 14.51     0.526 C 
ATOM   4189  O   VAL B 123      17.706  36.080  43.759  1.00 18.46    -0.500 OA
ATOM   4190  CB  VAL B 123      20.213  37.049  45.455  1.00 18.43     0.033 C 
ATOM   4191  HB  VAL B 123      19.286  37.176  46.061  1.00  0.00     0.000 H 
ATOM   4192  CG1 VAL B 123      20.884  35.699  45.787  1.00 19.83     0.006 C 
ATOM   4193 1HG1 VAL B 123      21.127  35.652  46.874  1.00  0.00     0.000 H 
ATOM   4194 2HG1 VAL B 123      21.779  35.509  45.150  1.00  0.00     0.000 H 
ATOM   4195 3HG1 VAL B 123      20.264  34.832  45.459  1.00  0.00     0.000 H 
ATOM   4196  CG2 VAL B 123      21.238  38.132  45.824  1.00 18.49     0.006 C 
ATOM   4197 1HG2 VAL B 123      21.481  38.085  46.911  1.00  0.00     0.000 H 
ATOM   4198 2HG2 VAL B 123      20.895  39.148  45.520  1.00  0.00     0.000 H 
ATOM   4199 3HG2 VAL B 123      22.154  38.069  45.191  1.00  0.00     0.000 H 
ATOM   4200  N   PHE B 124      19.497  34.997  42.902  1.00 13.42    -0.520 N 
ATOM   4201  HN  PHE B 124      20.486  35.065  42.661  1.00  0.00     0.248 HD
ATOM   4202  CA  PHE B 124      18.755  33.829  42.499  1.00 14.73     0.214 C 
ATOM   4203  HA  PHE B 124      17.898  33.688  43.198  1.00  0.00     0.000 H 
ATOM   4204  C   PHE B 124      19.633  32.589  42.543  1.00 15.64     0.526 C 
ATOM   4205  O   PHE B 124      20.861  32.586  42.368  1.00 11.74    -0.500 OA
ATOM   4206  CB  PHE B 124      18.212  33.988  41.078  1.00 16.41     0.038 C 
ATOM   4207  HB1 PHE B 124      17.693  33.051  40.768  1.00  0.00     0.000 H 
ATOM   4208  HB2 PHE B 124      19.058  34.001  40.352  1.00  0.00     0.000 H 
ATOM   4209  CG  PHE B 124      17.298  35.192  40.827  1.00 14.01     0.011 A 
ATOM   4210  CD1 PHE B 124      17.841  36.438  40.648  1.00 10.64    -0.011 A 
ATOM   4211  HD1 PHE B 124      18.935  36.575  40.612  1.00  0.00     0.000 H 
ATOM   4212  CD2 PHE B 124      15.950  35.015  40.846  1.00 12.69    -0.011 A 
ATOM   4213  HD2 PHE B 124      15.526  34.004  40.968  1.00  0.00     0.000 H 
ATOM   4214  CE1 PHE B 124      17.004  37.503  40.516  1.00 13.27     0.004 A 
ATOM   4215  HE1 PHE B 124      17.426  38.513  40.381  1.00  0.00     0.000 H 
ATOM   4216  CE2 PHE B 124      15.122  36.094  40.713  1.00 13.50     0.004 A 
ATOM   4217  HE2 PHE B 124      14.028  35.958  40.739  1.00  0.00     0.000 H 
ATOM   4218  CZ  PHE B 124      15.651  37.337  40.548  1.00 12.59    -0.003 A 
ATOM   4219  HZ  PHE B 124      14.985  38.210  40.440  1.00  0.00     0.000 H 
ATOM   4220  N   GLN B 125      18.936  31.512  42.886  1.00 16.38    -0.520 N 
ATOM   4221  HN  GLN B 125      17.954  31.619  43.139  1.00  0.00     0.248 HD
ATOM   4222  CA  GLN B 125      19.529  30.183  42.913  1.00 19.75     0.210 C 
ATOM   4223  HA  GLN B 125      20.597  30.267  43.223  1.00  0.00     0.000 H 
ATOM   4224  C   GLN B 125      19.462  29.557  41.523  1.00 18.89     0.526 C 
ATOM   4225  O   GLN B 125      18.368  29.254  41.052  1.00 21.59    -0.500 OA
ATOM   4226  CB  GLN B 125      18.795  29.244  43.887  1.00 20.64     0.053 C 
ATOM   4227  HB1 GLN B 125      18.642  29.706  44.890  1.00  0.00     0.000 H 
ATOM   4228  HB2 GLN B 125      17.723  29.103  43.616  1.00  0.00     0.000 H 
ATOM   4229  CG  GLN B 125      19.558  27.916  43.965  1.00 20.79    -0.043 C 
ATOM   4230  HG1 GLN B 125      20.618  28.118  44.245  1.00  0.00     0.000 H 
ATOM   4231  HG2 GLN B 125      19.686  27.506  42.936  1.00  0.00     0.000 H 
ATOM   4232  CD  GLN B 125      19.005  26.838  44.864  1.00 20.39     0.675 C 
ATOM   4233  OE1 GLN B 125      18.187  27.063  45.760  1.00 19.95    -0.470 OA
ATOM   4234  NE2 GLN B 125      19.461  25.610  44.662  1.00 23.22    -0.867 N 
ATOM   4235 1HE2 GLN B 125      20.137  25.424  43.921  1.00  0.00     0.344 HD
ATOM   4236 2HE2 GLN B 125      19.087  24.881  45.270  1.00  0.00     0.344 HD
ATOM   4237  N   LEU B 126      20.589  29.416  40.839  1.00 17.66    -0.520 N 
ATOM   4238  HN  LEU B 126      21.451  29.829  41.194  1.00  0.00     0.248 HD
ATOM   4239  CA  LEU B 126      20.605  28.683  39.597  1.00 19.32     0.204 C 
ATOM   4240  HA  LEU B 126      19.604  28.764  39.112  1.00  0.00     0.000 H 
ATOM   4241  C   LEU B 126      20.912  27.206  39.872  1.00 21.36     0.526 C 
ATOM   4242  O   LEU B 126      21.011  26.749  41.009  1.00 26.63    -0.500 OA
ATOM   4243  CB  LEU B 126      21.675  29.258  38.646  1.00 16.78     0.016 C 
ATOM   4244  HB1 LEU B 126      22.603  29.417  39.244  1.00  0.00     0.000 H 
ATOM   4245  HB2 LEU B 126      21.978  28.441  37.950  1.00  0.00     0.000 H 
ATOM   4246  CG  LEU B 126      21.451  30.503  37.815  1.00 15.05     0.054 C 
ATOM   4247  HG  LEU B 126      21.992  30.395  36.846  1.00  0.00     0.000 H 
ATOM   4248  CD1 LEU B 126      19.944  30.622  37.537  1.00 16.44    -0.014 C 
ATOM   4249 1HD1 LEU B 126      19.569  29.713  37.011  1.00  0.00     0.000 H 
ATOM   4250 2HD1 LEU B 126      19.699  31.555  36.978  1.00  0.00     0.000 H 
ATOM   4251 3HD1 LEU B 126      19.366  30.829  38.468  1.00  0.00     0.000 H 
ATOM   4252  CD2 LEU B 126      21.959  31.734  38.528  1.00 10.54    -0.014 C 
ATOM   4253 1HD2 LEU B 126      23.052  31.648  38.730  1.00  0.00     0.000 H 
ATOM   4254 2HD2 LEU B 126      21.381  31.941  39.459  1.00  0.00     0.000 H 
ATOM   4255 3HD2 LEU B 126      21.714  32.667  37.969  1.00  0.00     0.000 H 
ATOM   4256  N   GLU B 127      21.072  26.398  38.843  1.00 25.44    -0.520 N 
ATOM   4257  HN  GLU B 127      20.855  26.767  37.917  1.00  0.00     0.248 HD
ATOM   4258  CA  GLU B 127      21.536  25.017  38.926  1.00 26.98     0.246 C 
ATOM   4259  HA  GLU B 127      22.043  24.849  39.905  1.00  0.00     0.000 H 
ATOM   4260  C   GLU B 127      22.555  24.850  37.775  1.00 25.78     0.526 C 
ATOM   4261  O   GLU B 127      22.582  25.653  36.825  1.00 26.97    -0.500 OA
ATOM   4262  CB  GLU B 127      20.353  24.066  38.789  1.00 26.77     0.000 C 
ATOM   4263  HB1 GLU B 127      19.500  24.503  38.219  1.00  0.00     0.000 H 
ATOM   4264  HB2 GLU B 127      20.554  23.209  38.105  1.00  0.00     0.000 H 
ATOM   4265  CG  GLU B 127      19.973  23.632  40.204  1.00 29.81    -0.208 C 
ATOM   4266  HG1 GLU B 127      20.643  24.110  40.957  1.00  0.00     0.000 H 
ATOM   4267  HG2 GLU B 127      20.238  22.562  40.373  1.00  0.00     0.000 H 
ATOM   4268  CD  GLU B 127      18.500  23.888  40.548  1.00 35.09     0.620 C 
ATOM   4269  OE1 GLU B 127      18.229  24.698  41.455  1.00 36.59    -0.706 OA
ATOM   4270  OE2 GLU B 127      17.624  23.272  39.908  1.00 35.18    -0.706 OA
ATOM   4271  N   LYS B 128      23.445  23.862  37.837  1.00 24.72    -0.520 N 
ATOM   4272  HN  LYS B 128      23.373  23.197  38.607  1.00  0.00     0.248 HD
ATOM   4273  CA  LYS B 128      24.530  23.675  36.854  1.00 25.57     0.227 C 
ATOM   4274  HA  LYS B 128      25.170  24.588  36.863  1.00  0.00     0.000 H 
ATOM   4275  C   LYS B 128      24.040  23.453  35.439  1.00 26.39     0.526 C 
ATOM   4276  O   LYS B 128      23.105  22.677  35.193  1.00 31.15    -0.500 OA
ATOM   4277  CB  LYS B 128      25.391  22.483  37.277  1.00 24.31     0.039 C 
ATOM   4278  HB1 LYS B 128      25.863  22.709  38.261  1.00  0.00     0.000 H 
ATOM   4279  HB2 LYS B 128      24.723  21.633  37.549  1.00  0.00     0.000 H 
ATOM   4280  CG  LYS B 128      26.445  21.990  36.334  1.00 20.47     0.053 C 
ATOM   4281  HG1 LYS B 128      26.009  21.490  35.438  1.00  0.00     0.000 H 
ATOM   4282  HG2 LYS B 128      26.968  22.825  35.812  1.00  0.00     0.000 H 
ATOM   4283  CD  LYS B 128      27.401  21.095  37.077  1.00 18.14     0.048 C 
ATOM   4284  HD1 LYS B 128      27.721  21.516  38.059  1.00  0.00     0.000 H 
ATOM   4285  HD2 LYS B 128      26.919  20.169  37.469  1.00  0.00     0.000 H 
ATOM   4286  CE  LYS B 128      28.554  20.813  36.151  1.00 19.87     0.218 C 
ATOM   4287  HE1 LYS B 128      28.247  20.131  35.324  1.00  0.00     0.000 H 
ATOM   4288  HE2 LYS B 128      28.817  21.715  35.551  1.00  0.00     0.000 H 
ATOM   4289  NZ  LYS B 128      29.710  20.297  36.848  1.00 23.88    -0.272 N 
ATOM   4290  HZ1 LYS B 128      30.491  20.106  36.221  1.00  0.00     0.311 HD
ATOM   4291  HZ2 LYS B 128      29.470  19.471  37.397  1.00  0.00     0.311 HD
ATOM   4292  HZ3 LYS B 128      29.991  20.921  37.605  1.00  0.00     0.311 HD
ATOM   4293  N   GLY B 129      24.652  24.165  34.521  1.00 25.54    -0.520 N 
ATOM   4294  HN  GLY B 129      25.379  24.826  34.794  1.00  0.00     0.248 HD
ATOM   4295  CA  GLY B 129      24.301  24.017  33.124  1.00 26.65     0.246 C 
ATOM   4296  HA1 GLY B 129      25.206  24.064  32.475  1.00  0.00     0.000 H 
ATOM   4297  HA2 GLY B 129      23.974  22.975  32.900  1.00  0.00     0.000 H 
ATOM   4298  C   GLY B 129      23.251  25.031  32.678  1.00 28.06     0.526 C 
ATOM   4299  O   GLY B 129      23.005  25.121  31.474  1.00 28.86    -0.500 OA
ATOM   4300  N   ASP B 130      22.645  25.792  33.612  1.00 27.10    -0.520 N 
ATOM   4301  HN  ASP B 130      22.826  25.605  34.598  1.00  0.00     0.248 HD
ATOM   4302  CA  ASP B 130      21.741  26.871  33.251  1.00 25.89     0.246 C 
ATOM   4303  HA  ASP B 130      20.840  26.425  32.768  1.00  0.00     0.000 H 
ATOM   4304  C   ASP B 130      22.330  27.910  32.297  1.00 24.94     0.526 C 
ATOM   4305  O   ASP B 130      23.534  28.011  32.084  1.00 21.85    -0.500 OA
ATOM   4306  CB  ASP B 130      21.296  27.620  34.475  1.00 27.75    -0.208 C 
ATOM   4307  HB1 ASP B 130      20.926  28.632  34.188  1.00  0.00     0.000 H 
ATOM   4308  HB2 ASP B 130      22.181  27.900  35.093  1.00  0.00     0.000 H 
ATOM   4309  CG  ASP B 130      20.258  26.912  35.342  1.00 33.21     0.620 C 
ATOM   4310  OD1 ASP B 130      19.698  25.890  34.924  1.00 34.86    -0.706 OA
ATOM   4311  OD2 ASP B 130      20.005  27.410  36.449  1.00 31.87    -0.706 OA
ATOM   4312  N   ARG B 131      21.435  28.697  31.724  1.00 26.99    -0.520 N 
ATOM   4313  HN  ARG B 131      20.457  28.510  31.944  1.00  0.00     0.248 HD
ATOM   4314  CA  ARG B 131      21.697  29.797  30.817  1.00 22.47     0.237 C 
ATOM   4315  HA  ARG B 131      22.774  30.081  30.874  1.00  0.00     0.000 H 
ATOM   4316  C   ARG B 131      20.814  30.983  31.322  1.00 23.31     0.526 C 
ATOM   4317  O   ARG B 131      19.757  30.903  31.967  1.00 20.53    -0.500 OA
ATOM   4318  CB  ARG B 131      21.347  29.377  29.373  1.00 21.16     0.049 C 
ATOM   4319  HB1 ARG B 131      20.277  29.064  29.334  1.00  0.00     0.000 H 
ATOM   4320  HB2 ARG B 131      21.328  30.284  28.725  1.00  0.00     0.000 H 
ATOM   4321  CG  ARG B 131      22.208  28.300  28.701  1.00 19.65     0.058 C 
ATOM   4322  HG1 ARG B 131      22.250  27.340  29.266  1.00  0.00     0.000 H 
ATOM   4323  HG2 ARG B 131      23.302  28.515  28.730  1.00  0.00     0.000 H 
ATOM   4324  CD  ARG B 131      21.640  28.160  27.281  1.00 24.57     0.111 C 
ATOM   4325  HD1 ARG B 131      21.650  29.165  26.797  1.00  0.00     0.000 H 
ATOM   4326  HD2 ARG B 131      20.546  27.959  27.358  1.00  0.00     0.000 H 
ATOM   4327  NE  ARG B 131      22.224  27.191  26.347  1.00 28.12    -0.493 N 
ATOM   4328  HE  ARG B 131      22.197  26.202  26.595  1.00  0.00     0.294 HD
ATOM   4329  CZ  ARG B 131      22.803  27.546  25.161  1.00 31.35     0.814 C 
ATOM   4330  NH1 ARG B 131      23.312  26.606  24.375  1.00 31.02    -0.634 N 
ATOM   4331 1HH1 ARG B 131      23.744  26.871  23.490  1.00  0.00     0.361 HD
ATOM   4332 2HH1 ARG B 131      23.200  25.652  24.718  1.00  0.00     0.361 HD
ATOM   4333  NH2 ARG B 131      22.950  28.802  24.709  1.00 29.54    -0.634 N 
ATOM   4334 1HH2 ARG B 131      23.382  29.067  23.824  1.00  0.00     0.361 HD
ATOM   4335 2HH2 ARG B 131      22.559  29.525  25.313  1.00  0.00     0.361 HD
ATOM   4336  N   LEU B 132      21.343  32.177  31.103  1.00 21.54    -0.520 N 
ATOM   4337  HN  LEU B 132      22.196  32.223  30.545  1.00  0.00     0.248 HD
ATOM   4338  CA  LEU B 132      20.799  33.416  31.597  1.00 17.92     0.204 C 
ATOM   4339  HA  LEU B 132      19.751  33.283  31.954  1.00  0.00     0.000 H 
ATOM   4340  C   LEU B 132      20.856  34.334  30.397  1.00 17.67     0.526 C 
ATOM   4341  O   LEU B 132      21.912  34.381  29.759  1.00 13.87    -0.500 OA
ATOM   4342  CB  LEU B 132      21.706  33.900  32.718  1.00 19.62     0.016 C 
ATOM   4343  HB1 LEU B 132      21.298  34.850  33.136  1.00  0.00     0.000 H 
ATOM   4344  HB2 LEU B 132      22.668  34.257  32.282  1.00  0.00     0.000 H 
ATOM   4345  CG  LEU B 132      22.002  32.934  33.864  1.00 18.60     0.054 C 
ATOM   4346  HG  LEU B 132      22.082  31.908  33.435  1.00  0.00     0.000 H 
ATOM   4347  CD1 LEU B 132      23.323  33.259  34.545  1.00 19.18    -0.014 C 
ATOM   4348 1HD1 LEU B 132      23.539  32.554  35.381  1.00  0.00     0.000 H 
ATOM   4349 2HD1 LEU B 132      23.354  34.319  34.888  1.00  0.00     0.000 H 
ATOM   4350 3HD1 LEU B 132      24.162  33.290  33.812  1.00  0.00     0.000 H 
ATOM   4351  CD2 LEU B 132      20.801  32.967  34.753  1.00 19.26    -0.014 C 
ATOM   4352 1HD2 LEU B 132      21.017  32.262  35.589  1.00  0.00     0.000 H 
ATOM   4353 2HD2 LEU B 132      19.847  32.745  34.220  1.00  0.00     0.000 H 
ATOM   4354 3HD2 LEU B 132      20.529  33.993  35.095  1.00  0.00     0.000 H 
ATOM   4355  N   SER B 133      19.806  35.074  30.046  1.00 17.35    -0.520 N 
ATOM   4356  HN  SER B 133      18.947  35.019  30.594  1.00  0.00     0.248 HD
ATOM   4357  CA  SER B 133      19.864  35.956  28.899  1.00 17.02     0.292 C 
ATOM   4358  HA  SER B 133      20.932  36.102  28.613  1.00  0.00     0.000 H 
ATOM   4359  C   SER B 133      19.259  37.308  29.230  1.00 16.20     0.526 C 
ATOM   4360  O   SER B 133      18.255  37.329  29.911  1.00 17.48    -0.500 OA
ATOM   4361  CB  SER B 133      19.123  35.320  27.721  1.00 16.57     0.194 C 
ATOM   4362  HB1 SER B 133      19.158  35.994  26.834  1.00  0.00     0.000 H 
ATOM   4363  HB2 SER B 133      19.699  34.451  27.326  1.00  0.00     0.000 H 
ATOM   4364  OG  SER B 133      17.777  34.936  27.997  1.00 22.42    -0.550 OA
ATOM   4365  HG  SER B 133      17.317  34.541  27.266  1.00  0.00     0.310 HD
ATOM   4366  N   ALA B 134      19.929  38.406  28.856  1.00 20.76    -0.520 N 
ATOM   4367  HN  ALA B 134      20.850  38.252  28.445  1.00  0.00     0.248 HD
ATOM   4368  CA  ALA B 134      19.495  39.810  28.968  1.00 21.73     0.215 C 
ATOM   4369  HA  ALA B 134      18.759  39.913  29.799  1.00  0.00     0.000 H 
ATOM   4370  C   ALA B 134      18.838  40.244  27.623  1.00 20.50     0.526 C 
ATOM   4371  O   ALA B 134      19.556  40.397  26.638  1.00 21.38    -0.500 OA
ATOM   4372  CB  ALA B 134      20.727  40.666  29.259  1.00 19.67     0.031 C 
ATOM   4373  HB1 ALA B 134      21.197  40.356  30.221  1.00  0.00     0.000 H 
ATOM   4374  HB2 ALA B 134      20.489  41.755  29.246  1.00  0.00     0.000 H 
ATOM   4375  HB3 ALA B 134      21.456  40.646  28.415  1.00  0.00     0.000 H 
ATOM   4376  N   GLU B 135      17.529  40.420  27.450  1.00 17.04    -0.520 N 
ATOM   4377  HN  GLU B 135      16.920  40.367  28.266  1.00  0.00     0.248 HD
ATOM   4378  CA  GLU B 135      16.922  40.687  26.141  1.00 18.01     0.246 C 
ATOM   4379  HA  GLU B 135      17.731  40.813  25.384  1.00  0.00     0.000 H 
ATOM   4380  C   GLU B 135      16.128  41.982  26.241  1.00 14.40     0.526 C 
ATOM   4381  O   GLU B 135      15.308  42.209  27.124  1.00 14.32    -0.500 OA
ATOM   4382  CB  GLU B 135      15.933  39.521  25.661  1.00 15.79     0.000 C 
ATOM   4383  HB1 GLU B 135      15.593  39.721  24.618  1.00  0.00     0.000 H 
ATOM   4384  HB2 GLU B 135      14.964  39.600  26.207  1.00  0.00     0.000 H 
ATOM   4385  CG  GLU B 135      16.475  38.081  25.766  1.00 15.33    -0.208 C 
ATOM   4386  HG1 GLU B 135      17.255  37.946  24.981  1.00  0.00     0.000 H 
ATOM   4387  HG2 GLU B 135      17.077  38.004  26.701  1.00  0.00     0.000 H 
ATOM   4388  CD  GLU B 135      15.513  36.859  25.708  1.00 20.82     0.620 C 
ATOM   4389  OE1 GLU B 135      16.055  35.769  25.600  1.00 22.19    -0.706 OA
ATOM   4390  OE2 GLU B 135      14.271  36.922  25.792  1.00 20.63    -0.706 OA
ATOM   4391  N   ILE B 136      16.458  42.923  25.396  1.00 15.46    -0.520 N 
ATOM   4392  HN  ILE B 136      17.281  42.811  24.804  1.00  0.00     0.248 HD
ATOM   4393  CA  ILE B 136      15.648  44.137  25.299  1.00 18.00     0.199 C 
ATOM   4394  HA  ILE B 136      15.100  44.293  26.257  1.00  0.00     0.000 H 
ATOM   4395  C   ILE B 136      14.635  43.950  24.158  1.00 19.89     0.526 C 
ATOM   4396  O   ILE B 136      14.807  43.026  23.346  1.00 20.61    -0.500 OA
ATOM   4397  CB  ILE B 136      16.491  45.372  24.992  1.00 14.94     0.030 C 
ATOM   4398  HB  ILE B 136      15.782  46.206  24.781  1.00  0.00     0.000 H 
ATOM   4399  CG1 ILE B 136      17.288  45.128  23.712  1.00 11.13     0.017 C 
ATOM   4400 1HG1 ILE B 136      16.580  44.994  22.861  1.00  0.00     0.000 H 
ATOM   4401 2HG1 ILE B 136      17.756  44.117  23.761  1.00  0.00     0.000 H 
ATOM   4402  CG2 ILE B 136      17.240  45.737  26.249  1.00 15.17     0.001 C 
ATOM   4403 1HG2 ILE B 136      16.658  45.915  27.183  1.00  0.00     0.000 H 
ATOM   4404 2HG2 ILE B 136      17.878  46.628  26.044  1.00  0.00     0.000 H 
ATOM   4405 3HG2 ILE B 136      18.014  44.960  26.447  1.00  0.00     0.000 H 
ATOM   4406  CD1 ILE B 136      18.338  46.140  23.325  1.00  9.74    -0.001 C 
ATOM   4407 1HD1 ILE B 136      18.920  45.962  22.391  1.00  0.00     0.000 H 
ATOM   4408 2HD1 ILE B 136      19.046  46.274  24.176  1.00  0.00     0.000 H 
ATOM   4409 3HD1 ILE B 136      17.870  47.151  23.276  1.00  0.00     0.000 H 
ATOM   4410  N   ASN B 137      13.598  44.788  24.010  1.00 16.57    -0.520 N 
ATOM   4411  HN  ASN B 137      13.469  45.587  24.631  1.00  0.00     0.248 HD
ATOM   4412  CA  ASN B 137      12.669  44.514  22.933  1.00 13.57     0.217 C 
ATOM   4413  HA  ASN B 137      12.779  43.445  22.635  1.00  0.00     0.000 H 
ATOM   4414  C   ASN B 137      13.013  45.371  21.757  1.00 11.22     0.526 C 
ATOM   4415  O   ASN B 137      12.482  45.087  20.693  1.00 14.39    -0.500 OA
ATOM   4416  CB  ASN B 137      11.195  44.755  23.368  1.00 14.66     0.003 C 
ATOM   4417  HB1 ASN B 137      10.508  44.279  22.630  1.00  0.00     0.000 H 
ATOM   4418  HB2 ASN B 137      10.974  44.150  24.278  1.00  0.00     0.000 H 
ATOM   4419  CG  ASN B 137      10.765  46.194  23.602  1.00 13.36     0.675 C 
ATOM   4420  OD1 ASN B 137      11.493  46.998  24.185  1.00 15.05    -0.470 OA
ATOM   4421  ND2 ASN B 137       9.588  46.539  23.125  1.00 11.19    -0.867 N 
ATOM   4422 1HD2 ASN B 137       8.985  45.873  22.642  1.00  0.00     0.344 HD
ATOM   4423 2HD2 ASN B 137       9.299  47.505  23.282  1.00  0.00     0.344 HD
ATOM   4424  N   ARG B 138      13.892  46.364  21.910  1.00  7.82    -0.520 N 
ATOM   4425  HN  ARG B 138      14.308  46.497  22.832  1.00  0.00     0.248 HD
ATOM   4426  CA  ARG B 138      14.286  47.252  20.861  1.00  3.41     0.237 C 
ATOM   4427  HA  ARG B 138      13.990  46.796  19.888  1.00  0.00     0.000 H 
ATOM   4428  C   ARG B 138      15.774  47.532  20.820  1.00  8.00     0.526 C 
ATOM   4429  O   ARG B 138      16.278  48.504  21.378  1.00 10.36    -0.500 OA
ATOM   4430  CB  ARG B 138      13.569  48.542  21.007  1.00  8.44     0.049 C 
ATOM   4431  HB1 ARG B 138      13.942  49.260  20.240  1.00  0.00     0.000 H 
ATOM   4432  HB2 ARG B 138      13.902  49.045  21.945  1.00  0.00     0.000 H 
ATOM   4433  CG  ARG B 138      12.048  48.508  20.967  1.00 11.02     0.058 C 
ATOM   4434  HG1 ARG B 138      11.651  47.734  21.665  1.00  0.00     0.000 H 
ATOM   4435  HG2 ARG B 138      11.620  49.422  21.441  1.00  0.00     0.000 H 
ATOM   4436  CD  ARG B 138      11.480  48.310  19.557  1.00 16.26     0.111 C 
ATOM   4437  HD1 ARG B 138      10.372  48.197  19.611  1.00  0.00     0.000 H 
ATOM   4438  HD2 ARG B 138      11.769  47.303  19.174  1.00  0.00     0.000 H 
ATOM   4439  NE  ARG B 138      11.824  49.335  18.561  1.00 14.12    -0.493 N 
ATOM   4440  HE  ARG B 138      12.552  49.100  17.887  1.00  0.00     0.294 HD
ATOM   4441  CZ  ARG B 138      11.270  50.546  18.458  1.00 15.22     0.814 C 
ATOM   4442  NH1 ARG B 138      11.726  51.293  17.488  1.00 17.90    -0.634 N 
ATOM   4443 1HH1 ARG B 138      11.303  52.218  17.409  1.00  0.00     0.361 HD
ATOM   4444 2HH1 ARG B 138      12.477  50.922  16.906  1.00  0.00     0.361 HD
ATOM   4445  NH2 ARG B 138      10.288  51.031  19.219  1.00 14.51    -0.634 N 
ATOM   4446 1HH2 ARG B 138       9.865  51.956  19.140  1.00  0.00     0.361 HD
ATOM   4447 2HH2 ARG B 138       9.932  50.448  19.976  1.00  0.00     0.361 HD
ATOM   4448  N   PRO B 139      16.594  46.736  20.139  1.00 10.12    -0.257 N 
ATOM   4449  CA  PRO B 139      18.022  46.985  20.018  1.00 13.84     0.112 C 
ATOM   4450  HA  PRO B 139      18.443  47.150  21.037  1.00  0.00     0.000 H 
ATOM   4451  C   PRO B 139      18.333  48.198  19.163  1.00 19.02     0.526 C 
ATOM   4452  O   PRO B 139      19.377  48.826  19.343  1.00 22.06    -0.500 OA
ATOM   4453  CB  PRO B 139      18.593  45.713  19.463  1.00 12.74    -0.001 C 
ATOM   4454  HB1 PRO B 139      18.944  44.969  20.215  1.00  0.00     0.000 H 
ATOM   4455  HB2 PRO B 139      19.583  45.804  18.959  1.00  0.00     0.000 H 
ATOM   4456  CG  PRO B 139      17.454  45.275  18.593  1.00 14.74     0.036 C 
ATOM   4457  HG1 PRO B 139      17.555  44.249  18.168  1.00  0.00     0.000 H 
ATOM   4458  HG2 PRO B 139      17.389  45.794  17.608  1.00  0.00     0.000 H 
ATOM   4459  CD  PRO B 139      16.245  45.477  19.510  1.00 10.02     0.084 C 
ATOM   4460  HD1 PRO B 139      15.250  45.449  19.008  1.00  0.00     0.000 H 
ATOM   4461  HD2 PRO B 139      16.023  44.635  20.207  1.00  0.00     0.000 H 
ATOM   4462  N   ASP B 140      17.385  48.579  18.282  1.00 18.46    -0.520 N 
ATOM   4463  HN  ASP B 140      16.532  48.024  18.214  1.00  0.00     0.248 HD
ATOM   4464  CA  ASP B 140      17.524  49.738  17.431  1.00 14.92     0.246 C 
ATOM   4465  HA  ASP B 140      18.458  49.619  16.833  1.00  0.00     0.000 H 
ATOM   4466  C   ASP B 140      17.625  51.009  18.199  1.00 13.63     0.526 C 
ATOM   4467  O   ASP B 140      17.896  51.995  17.538  1.00 20.32    -0.500 OA
ATOM   4468  CB  ASP B 140      16.338  49.871  16.449  1.00 12.25    -0.208 C 
ATOM   4469  HB1 ASP B 140      16.573  50.682  15.720  1.00  0.00     0.000 H 
ATOM   4470  HB2 ASP B 140      16.326  48.973  15.788  1.00  0.00     0.000 H 
ATOM   4471  CG  ASP B 140      14.921  50.097  16.985  1.00 11.72     0.620 C 
ATOM   4472  OD1 ASP B 140      14.372  51.185  16.818  1.00  7.66    -0.706 OA
ATOM   4473  OD2 ASP B 140      14.365  49.155  17.538  1.00 13.30    -0.706 OA
ATOM   4474  N   TYR B 141      17.319  51.004  19.501  1.00 16.36    -0.520 N 
ATOM   4475  HN  TYR B 141      17.014  50.122  19.913  1.00  0.00     0.248 HD
ATOM   4476  CA  TYR B 141      17.391  52.178  20.378  1.00 17.57     0.245 C 
ATOM   4477  HA  TYR B 141      17.463  53.077  19.722  1.00  0.00     0.000 H 
ATOM   4478  C   TYR B 141      18.556  52.251  21.380  1.00 19.48     0.526 C 
ATOM   4479  O   TYR B 141      18.630  53.244  22.118  1.00 22.36    -0.500 OA
ATOM   4480  CB  TYR B 141      16.139  52.332  21.214  1.00 16.73     0.022 C 
ATOM   4481  HB1 TYR B 141      15.816  51.334  21.591  1.00  0.00     0.000 H 
ATOM   4482  HB2 TYR B 141      16.390  52.841  22.174  1.00  0.00     0.000 H 
ATOM   4483  CG  TYR B 141      14.972  53.029  20.563  1.00 16.34    -0.001 A 
ATOM   4484  CD1 TYR B 141      13.716  52.484  20.732  1.00 15.94    -0.035 A 
ATOM   4485  HD1 TYR B 141      13.581  51.565  21.327  1.00  0.00     0.000 H 
ATOM   4486  CD2 TYR B 141      15.162  54.185  19.825  1.00 18.51    -0.035 A 
ATOM   4487  HD2 TYR B 141      16.175  54.604  19.701  1.00  0.00     0.000 H 
ATOM   4488  CE1 TYR B 141      12.636  53.101  20.149  1.00 18.49     0.100 A 
ATOM   4489  HE1 TYR B 141      11.624  52.677  20.262  1.00  0.00     0.000 H 
ATOM   4490  CE2 TYR B 141      14.078  54.810  19.246  1.00 17.98     0.100 A 
ATOM   4491  HE2 TYR B 141      14.208  55.733  18.656  1.00  0.00     0.000 H 
ATOM   4492  CZ  TYR B 141      12.829  54.257  19.420  1.00 19.28    -0.121 A 
ATOM   4493  OH  TYR B 141      11.746  54.875  18.844  1.00 23.12    -0.368 OA
ATOM   4494  HH  TYR B 141      11.879  55.671  18.342  1.00  0.00     0.339 HD
ATOM   4495  N   LEU B 142      19.461  51.262  21.496  1.00 16.18    -0.520 N 
ATOM   4496  HN  LEU B 142      19.357  50.430  20.915  1.00  0.00     0.248 HD
ATOM   4497  CA  LEU B 142      20.589  51.336  22.426  1.00 12.89     0.204 C 
ATOM   4498  HA  LEU B 142      20.179  51.423  23.459  1.00  0.00     0.000 H 
ATOM   4499  C   LEU B 142      21.557  52.503  22.199  1.00 12.26     0.526 C 
ATOM   4500  O   LEU B 142      21.352  53.244  21.235  1.00 11.11    -0.500 OA
ATOM   4501  CB  LEU B 142      21.348  50.036  22.333  1.00 11.97     0.016 C 
ATOM   4502  HB1 LEU B 142      22.295  50.140  22.912  1.00  0.00     0.000 H 
ATOM   4503  HB2 LEU B 142      21.732  49.927  21.292  1.00  0.00     0.000 H 
ATOM   4504  CG  LEU B 142      20.688  48.745  22.732  1.00  9.70     0.054 C 
ATOM   4505  HG  LEU B 142      19.745  48.597  22.155  1.00  0.00     0.000 H 
ATOM   4506  CD1 LEU B 142      21.641  47.615  22.473  1.00 11.84    -0.014 C 
ATOM   4507 1HD1 LEU B 142      21.851  47.625  21.378  1.00  0.00     0.000 H 
ATOM   4508 2HD1 LEU B 142      21.271  46.631  22.843  1.00  0.00     0.000 H 
ATOM   4509 3HD1 LEU B 142      22.562  47.661  23.100  1.00  0.00     0.000 H 
ATOM   4510  CD2 LEU B 142      20.404  48.731  24.216  1.00 13.46    -0.014 C 
ATOM   4511 1HD2 LEU B 142      19.696  49.571  24.408  1.00  0.00     0.000 H 
ATOM   4512 2HD2 LEU B 142      21.325  48.777  24.843  1.00  0.00     0.000 H 
ATOM   4513 3HD2 LEU B 142      20.034  47.747  24.586  1.00  0.00     0.000 H 
ATOM   4514  N   LEU B 143      22.600  52.702  23.049  1.00  9.83    -0.520 N 
ATOM   4515  HN  LEU B 143      22.649  52.118  23.884  1.00  0.00     0.248 HD
ATOM   4516  CA  LEU B 143      23.668  53.706  22.848  1.00  7.63     0.204 C 
ATOM   4517  HA  LEU B 143      23.760  53.920  21.757  1.00  0.00     0.000 H 
ATOM   4518  C   LEU B 143      25.014  53.192  23.365  1.00 10.98     0.526 C 
ATOM   4519  O   LEU B 143      25.136  52.638  24.454  1.00 10.13    -0.500 OA
ATOM   4520  CB  LEU B 143      23.288  54.991  23.569  1.00 11.29     0.016 C 
ATOM   4521  HB1 LEU B 143      22.219  55.171  23.309  1.00  0.00     0.000 H 
ATOM   4522  HB2 LEU B 143      23.258  54.725  24.651  1.00  0.00     0.000 H 
ATOM   4523  CG  LEU B 143      23.944  56.339  23.509  1.00  7.41     0.054 C 
ATOM   4524  HG  LEU B 143      23.181  57.105  23.782  1.00  0.00     0.000 H 
ATOM   4525  CD1 LEU B 143      25.033  56.382  24.542  1.00  8.98    -0.014 C 
ATOM   4526 1HD1 LEU B 143      25.521  57.384  24.497  1.00  0.00     0.000 H 
ATOM   4527 2HD1 LEU B 143      25.762  55.545  24.432  1.00  0.00     0.000 H 
ATOM   4528 3HD1 LEU B 143      24.665  56.129  25.564  1.00  0.00     0.000 H 
ATOM   4529  CD2 LEU B 143      24.413  56.629  22.113  1.00 10.33    -0.014 C 
ATOM   4530 1HD2 LEU B 143      24.901  57.631  22.068  1.00  0.00     0.000 H 
ATOM   4531 2HD2 LEU B 143      23.588  56.535  21.369  1.00  0.00     0.000 H 
ATOM   4532 3HD2 LEU B 143      25.079  55.825  21.723  1.00  0.00     0.000 H 
ATOM   4533  N   PHE B 144      26.069  53.352  22.560  1.00 13.96    -0.520 N 
ATOM   4534  HN  PHE B 144      25.951  53.856  21.681  1.00  0.00     0.248 HD
ATOM   4535  CA  PHE B 144      27.373  52.829  22.903  1.00 15.34     0.214 C 
ATOM   4536  HA  PHE B 144      27.323  52.491  23.964  1.00  0.00     0.000 H 
ATOM   4537  C   PHE B 144      28.547  53.816  22.797  1.00 19.37     0.526 C 
ATOM   4538  O   PHE B 144      29.611  53.418  22.339  1.00 19.47    -0.500 OA
ATOM   4539  CB  PHE B 144      27.745  51.581  22.039  1.00 19.20     0.038 C 
ATOM   4540  HB1 PHE B 144      28.112  51.946  21.051  1.00  0.00     0.000 H 
ATOM   4541  HB2 PHE B 144      28.665  51.126  22.474  1.00  0.00     0.000 H 
ATOM   4542  CG  PHE B 144      26.745  50.459  21.781  1.00 18.35     0.011 A 
ATOM   4543  CD1 PHE B 144      26.006  49.892  22.795  1.00 17.88    -0.011 A 
ATOM   4544  HD1 PHE B 144      26.143  50.219  23.840  1.00  0.00     0.000 H 
ATOM   4545  CD2 PHE B 144      26.574  50.036  20.471  1.00 20.96    -0.011 A 
ATOM   4546  HD2 PHE B 144      27.178  50.494  19.670  1.00  0.00     0.000 H 
ATOM   4547  CE1 PHE B 144      25.091  48.908  22.481  1.00 22.52     0.004 A 
ATOM   4548  HE1 PHE B 144      24.490  48.445  23.282  1.00  0.00     0.000 H 
ATOM   4549  CE2 PHE B 144      25.662  49.053  20.155  1.00 18.50     0.004 A 
ATOM   4550  HE2 PHE B 144      25.535  48.724  19.110  1.00  0.00     0.000 H 
ATOM   4551  CZ  PHE B 144      24.917  48.490  21.153  1.00 22.44    -0.003 A 
ATOM   4552  HZ  PHE B 144      24.178  47.706  20.914  1.00  0.00     0.000 H 
ATOM   4553  N   ALA B 145      28.526  55.121  23.145  1.00 21.13    -0.520 N 
ATOM   4554  HN  ALA B 145      27.642  55.626  23.212  1.00  0.00     0.248 HD
ATOM   4555  CA  ALA B 145      29.808  55.807  23.428  1.00 22.43     0.215 C 
ATOM   4556  HA  ALA B 145      30.654  55.305  22.904  1.00  0.00     0.000 H 
ATOM   4557  C   ALA B 145      29.937  55.656  24.963  1.00 22.82     0.526 C 
ATOM   4558  O   ALA B 145      30.342  56.472  25.780  1.00 24.71    -0.500 OA
ATOM   4559  CB  ALA B 145      29.746  57.286  23.072  1.00 23.47     0.031 C 
ATOM   4560  HB1 ALA B 145      29.653  57.395  21.966  1.00  0.00     0.000 H 
ATOM   4561  HB2 ALA B 145      30.612  57.856  23.482  1.00  0.00     0.000 H 
ATOM   4562  HB3 ALA B 145      28.933  57.819  23.619  1.00  0.00     0.000 H 
ATOM   4563  N   GLU B 146      29.646  54.433  25.294  1.00 24.24    -0.520 N 
ATOM   4564  HN  GLU B 146      29.624  53.769  24.520  1.00  0.00     0.248 HD
ATOM   4565  CA  GLU B 146      29.356  53.884  26.564  1.00 27.42     0.246 C 
ATOM   4566  HA  GLU B 146      29.071  54.681  27.290  1.00  0.00     0.000 H 
ATOM   4567  C   GLU B 146      30.584  53.178  27.001  1.00 29.52     0.526 C 
ATOM   4568  O   GLU B 146      31.305  52.644  26.154  1.00 33.20    -0.500 OA
ATOM   4569  CB  GLU B 146      28.228  52.900  26.367  1.00 28.65     0.000 C 
ATOM   4570  HB1 GLU B 146      27.313  53.371  26.797  1.00  0.00     0.000 H 
ATOM   4571  HB2 GLU B 146      28.007  52.880  25.274  1.00  0.00     0.000 H 
ATOM   4572  CG  GLU B 146      28.238  51.442  26.841  1.00 29.53    -0.208 C 
ATOM   4573  HG1 GLU B 146      28.806  51.375  27.798  1.00  0.00     0.000 H 
ATOM   4574  HG2 GLU B 146      27.213  51.164  27.181  1.00  0.00     0.000 H 
ATOM   4575  CD  GLU B 146      28.752  50.371  25.882  1.00 30.66     0.620 C 
ATOM   4576  OE1 GLU B 146      29.035  50.664  24.721  1.00 33.80    -0.706 OA
ATOM   4577  OE2 GLU B 146      28.877  49.225  26.315  1.00 31.53    -0.706 OA
ATOM   4578  N   SER B 147      30.886  53.212  28.277  1.00 30.60    -0.520 N 
ATOM   4579  HN  SER B 147      30.532  53.917  28.924  1.00  0.00     0.248 HD
ATOM   4580  CA  SER B 147      31.768  52.150  28.663  1.00 33.59     0.292 C 
ATOM   4581  HA  SER B 147      32.086  51.548  27.780  1.00  0.00     0.000 H 
ATOM   4582  C   SER B 147      30.797  51.373  29.540  1.00 34.91     0.526 C 
ATOM   4583  O   SER B 147      30.161  50.412  29.062  1.00 40.00    -0.500 OA
ATOM   4584  CB  SER B 147      32.942  52.685  29.400  1.00 34.73     0.194 C 
ATOM   4585  HB1 SER B 147      33.485  51.857  29.912  1.00  0.00     0.000 H 
ATOM   4586  HB2 SER B 147      32.605  53.273  30.285  1.00  0.00     0.000 H 
ATOM   4587  OG  SER B 147      33.839  53.448  28.621  1.00 35.61    -0.550 OA
ATOM   4588  HG  SER B 147      34.590  53.790  29.092  1.00  0.00     0.310 HD
ATOM   4589  N   GLY B 148      30.520  51.768  30.777  1.00 30.15    -0.520 N 
ATOM   4590  HN  GLY B 148      30.983  52.569  31.206  1.00  0.00     0.248 HD
ATOM   4591  CA  GLY B 148      29.521  50.991  31.479  1.00 27.62     0.246 C 
ATOM   4592  HA1 GLY B 148      29.565  49.897  31.266  1.00  0.00     0.000 H 
ATOM   4593  HA2 GLY B 148      29.697  50.913  32.577  1.00  0.00     0.000 H 
ATOM   4594  C   GLY B 148      28.215  51.630  31.116  1.00 25.69     0.526 C 
ATOM   4595  O   GLY B 148      28.084  52.750  31.574  1.00 27.68    -0.500 OA
ATOM   4596  N   GLN B 149      27.408  51.135  30.165  1.00 20.32    -0.520 N 
ATOM   4597  HN  GLN B 149      27.761  50.383  29.573  1.00  0.00     0.248 HD
ATOM   4598  CA  GLN B 149      26.032  51.625  29.932  1.00 14.85     0.210 C 
ATOM   4599  HA  GLN B 149      25.622  52.037  30.884  1.00  0.00     0.000 H 
ATOM   4600  C   GLN B 149      25.230  50.398  29.531  1.00 16.65     0.526 C 
ATOM   4601  O   GLN B 149      24.004  50.295  29.759  1.00 18.96    -0.500 OA
ATOM   4602  CB  GLN B 149      25.872  52.694  28.796  1.00 11.58     0.053 C 
ATOM   4603  HB1 GLN B 149      24.794  52.802  28.531  1.00  0.00     0.000 H 
ATOM   4604  HB2 GLN B 149      26.277  52.289  27.839  1.00  0.00     0.000 H 
ATOM   4605  CG  GLN B 149      26.493  54.112  29.075  1.00 10.86    -0.043 C 
ATOM   4606  HG1 GLN B 149      27.542  53.978  29.428  1.00  0.00     0.000 H 
ATOM   4607  HG2 GLN B 149      26.008  54.540  29.983  1.00  0.00     0.000 H 
ATOM   4608  CD  GLN B 149      26.482  55.169  27.972  1.00 10.83     0.675 C 
ATOM   4609  OE1 GLN B 149      25.962  54.845  26.923  1.00 16.40    -0.470 OA
ATOM   4610  NE2 GLN B 149      26.977  56.423  27.970  1.00  9.37    -0.867 N 
ATOM   4611 1HE2 GLN B 149      27.414  56.695  28.851  1.00  0.00     0.344 HD
ATOM   4612 2HE2 GLN B 149      26.970  57.129  27.234  1.00  0.00     0.344 HD
ATOM   4613  N   VAL B 150      25.931  49.397  28.956  1.00 12.52    -0.520 N 
ATOM   4614  HN  VAL B 150      26.931  49.514  28.790  1.00  0.00     0.248 HD
ATOM   4615  CA  VAL B 150      25.289  48.171  28.575  1.00 10.77     0.201 C 
ATOM   4616  HA  VAL B 150      24.253  48.132  28.986  1.00  0.00     0.000 H 
ATOM   4617  C   VAL B 150      26.148  47.128  29.225  1.00 11.88     0.526 C 
ATOM   4618  O   VAL B 150      27.335  47.151  28.941  1.00 14.56    -0.500 OA
ATOM   4619  CB  VAL B 150      25.263  48.018  27.014  1.00 10.71     0.033 C 
ATOM   4620  HB  VAL B 150      26.260  47.674  26.653  1.00  0.00     0.000 H 
ATOM   4621  CG1 VAL B 150      24.191  46.985  26.638  1.00  8.87     0.006 C 
ATOM   4622 1HG1 VAL B 150      24.173  46.876  25.528  1.00  0.00     0.000 H 
ATOM   4623 2HG1 VAL B 150      23.190  47.237  27.059  1.00  0.00     0.000 H 
ATOM   4624 3HG1 VAL B 150      24.336  46.010  27.160  1.00  0.00     0.000 H 
ATOM   4625  CG2 VAL B 150      24.889  49.340  26.322  1.00  7.79     0.006 C 
ATOM   4626 1HG2 VAL B 150      24.871  49.231  25.212  1.00  0.00     0.000 H 
ATOM   4627 2HG2 VAL B 150      25.562  50.170  26.639  1.00  0.00     0.000 H 
ATOM   4628 3HG2 VAL B 150      23.924  49.743  26.708  1.00  0.00     0.000 H 
ATOM   4629  N   TYR B 151      25.633  46.275  30.117  1.00 14.87    -0.520 N 
ATOM   4630  HN  TYR B 151      24.646  46.381  30.353  1.00  0.00     0.248 HD
ATOM   4631  CA  TYR B 151      26.370  45.206  30.778  1.00 13.08     0.245 C 
ATOM   4632  HA  TYR B 151      27.057  44.740  30.034  1.00  0.00     0.000 H 
ATOM   4633  C   TYR B 151      25.407  44.155  31.260  1.00 11.39     0.526 C 
ATOM   4634  O   TYR B 151      24.186  44.379  31.331  1.00  9.56    -0.500 OA
ATOM   4635  CB  TYR B 151      27.201  45.600  32.036  1.00 15.19     0.022 C 
ATOM   4636  HB1 TYR B 151      28.188  45.985  31.688  1.00  0.00     0.000 H 
ATOM   4637  HB2 TYR B 151      27.491  44.661  32.563  1.00  0.00     0.000 H 
ATOM   4638  CG  TYR B 151      26.656  46.581  33.086  1.00 15.22    -0.001 A 
ATOM   4639  CD1 TYR B 151      26.767  47.949  32.800  1.00 14.61    -0.035 A 
ATOM   4640  HD1 TYR B 151      27.229  48.275  31.853  1.00  0.00     0.000 H 
ATOM   4641  CD2 TYR B 151      26.083  46.152  34.267  1.00 10.81    -0.035 A 
ATOM   4642  HD2 TYR B 151      25.999  45.075  34.490  1.00  0.00     0.000 H 
ATOM   4643  CE1 TYR B 151      26.309  48.876  33.683  1.00 13.40     0.100 A 
ATOM   4644  HE1 TYR B 151      26.399  49.953  33.461  1.00  0.00     0.000 H 
ATOM   4645  CE2 TYR B 151      25.615  47.096  35.168  1.00 12.86     0.100 A 
ATOM   4646  HE2 TYR B 151      25.156  46.777  36.119  1.00  0.00     0.000 H 
ATOM   4647  CZ  TYR B 151      25.728  48.449  34.864  1.00 12.90    -0.121 A 
ATOM   4648  OH  TYR B 151      25.185  49.435  35.677  1.00 13.88    -0.368 OA
ATOM   4649  HH  TYR B 151      25.262  50.359  35.469  1.00  0.00     0.339 HD
ATOM   4650  N   PHE B 152      26.050  42.996  31.483  1.00  9.09    -0.520 N 
ATOM   4651  HN  PHE B 152      27.050  42.967  31.286  1.00  0.00     0.248 HD
ATOM   4652  CA  PHE B 152      25.432  41.785  31.981  1.00  8.61     0.214 C 
ATOM   4653  HA  PHE B 152      24.525  42.035  32.580  1.00  0.00     0.000 H 
ATOM   4654  C   PHE B 152      26.458  41.074  32.856  1.00 10.15     0.526 C 
ATOM   4655  O   PHE B 152      27.566  40.771  32.392  1.00  7.63    -0.500 OA
ATOM   4656  CB  PHE B 152      25.060  40.915  30.823  1.00  9.04     0.038 C 
ATOM   4657  HB1 PHE B 152      24.559  41.534  30.042  1.00  0.00     0.000 H 
ATOM   4658  HB2 PHE B 152      25.984  40.605  30.282  1.00  0.00     0.000 H 
ATOM   4659  CG  PHE B 152      24.217  39.697  31.112  1.00  8.09     0.011 A 
ATOM   4660  CD1 PHE B 152      23.454  39.592  32.235  1.00  8.58    -0.011 A 
ATOM   4661  HD1 PHE B 152      23.489  40.375  33.011  1.00  0.00     0.000 H 
ATOM   4662  CD2 PHE B 152      24.163  38.702  30.160  1.00 10.42    -0.011 A 
ATOM   4663  HD2 PHE B 152      24.788  38.783  29.254  1.00  0.00     0.000 H 
ATOM   4664  CE1 PHE B 152      22.643  38.500  32.386  1.00  8.91     0.004 A 
ATOM   4665  HE1 PHE B 152      22.019  38.409  33.291  1.00  0.00     0.000 H 
ATOM   4666  CE2 PHE B 152      23.351  37.620  30.319  1.00  8.99     0.004 A 
ATOM   4667  HE2 PHE B 152      23.309  36.832  29.548  1.00  0.00     0.000 H 
ATOM   4668  CZ  PHE B 152      22.594  37.528  31.442  1.00  9.83    -0.003 A 
ATOM   4669  HZ  PHE B 152      21.934  36.656  31.588  1.00  0.00     0.000 H 
ATOM   4670  N   GLY B 153      26.134  40.823  34.121  1.00 10.96    -0.520 N 
ATOM   4671  HN  GLY B 153      25.223  41.109  34.480  1.00  0.00     0.248 HD
ATOM   4672  CA  GLY B 153      27.074  40.143  34.989  1.00 15.44     0.246 C 
ATOM   4673  HA1 GLY B 153      27.818  39.578  34.381  1.00  0.00     0.000 H 
ATOM   4674  HA2 GLY B 153      27.746  40.884  35.482  1.00  0.00     0.000 H 
ATOM   4675  C   GLY B 153      26.444  39.223  36.039  1.00 17.66     0.526 C 
ATOM   4676  O   GLY B 153      25.336  39.487  36.553  1.00 20.27    -0.500 OA
ATOM   4677  N   ILE B 154      27.152  38.137  36.341  1.00 12.60    -0.520 N 
ATOM   4678  HN  ILE B 154      28.030  37.940  35.860  1.00  0.00     0.248 HD
ATOM   4679  CA  ILE B 154      26.662  37.251  37.351  1.00 11.01     0.199 C 
ATOM   4680  HA  ILE B 154      25.846  37.750  37.924  1.00  0.00     0.000 H 
ATOM   4681  C   ILE B 154      27.833  37.004  38.253  1.00 13.05     0.526 C 
ATOM   4682  O   ILE B 154      28.975  36.888  37.758  1.00 18.22    -0.500 OA
ATOM   4683  CB  ILE B 154      26.159  35.882  36.806  1.00  8.34     0.030 C 
ATOM   4684  HB  ILE B 154      26.024  35.190  37.670  1.00  0.00     0.000 H 
ATOM   4685  CG1 ILE B 154      27.124  35.257  35.852  1.00  4.38     0.017 C 
ATOM   4686 1HG1 ILE B 154      28.168  35.643  35.919  1.00  0.00     0.000 H 
ATOM   4687 2HG1 ILE B 154      26.975  35.535  34.783  1.00  0.00     0.000 H 
ATOM   4688  CG2 ILE B 154      24.819  36.090  36.155  1.00  8.89     0.001 C 
ATOM   4689 1HG2 ILE B 154      24.099  36.556  36.867  1.00  0.00     0.000 H 
ATOM   4690 2HG2 ILE B 154      24.418  35.142  35.726  1.00  0.00     0.000 H 
ATOM   4691 3HG2 ILE B 154      24.906  36.679  35.212  1.00  0.00     0.000 H 
ATOM   4692  CD1 ILE B 154      26.967  33.761  36.159  1.00  7.63    -0.001 C 
ATOM   4693 1HD1 ILE B 154      27.687  33.295  35.447  1.00  0.00     0.000 H 
ATOM   4694 2HD1 ILE B 154      25.923  33.375  36.092  1.00  0.00     0.000 H 
ATOM   4695 3HD1 ILE B 154      27.116  33.483  37.228  1.00  0.00     0.000 H 
ATOM   4696  N   ILE B 155      27.581  36.964  39.555  1.00 13.13    -0.520 N 
ATOM   4697  HN  ILE B 155      26.636  37.155  39.888  1.00  0.00     0.248 HD
ATOM   4698  CA  ILE B 155      28.639  36.649  40.529  1.00 13.64     0.199 C 
ATOM   4699  HA  ILE B 155      29.464  36.120  39.997  1.00  0.00     0.000 H 
ATOM   4700  C   ILE B 155      28.064  35.711  41.588  1.00 14.98     0.526 C 
ATOM   4701  O   ILE B 155      26.883  35.760  41.977  1.00 14.09    -0.500 OA
ATOM   4702  CB  ILE B 155      29.207  37.995  41.120  1.00 10.25     0.030 C 
ATOM   4703  HB  ILE B 155      29.550  38.634  40.273  1.00  0.00     0.000 H 
ATOM   4704  CG1 ILE B 155      30.364  37.822  42.090  1.00  8.24     0.017 C 
ATOM   4705 1HG1 ILE B 155      29.965  37.495  43.079  1.00  0.00     0.000 H 
ATOM   4706 2HG1 ILE B 155      30.777  38.825  42.348  1.00  0.00     0.000 H 
ATOM   4707  CG2 ILE B 155      28.049  38.677  41.791  1.00 13.55     0.001 C 
ATOM   4708 1HG2 ILE B 155      28.451  39.629  42.209  1.00  0.00     0.000 H 
ATOM   4709 2HG2 ILE B 155      27.537  38.040  42.550  1.00  0.00     0.000 H 
ATOM   4710 3HG2 ILE B 155      27.170  38.822  41.121  1.00  0.00     0.000 H 
ATOM   4711  CD1 ILE B 155      31.513  36.898  41.684  1.00  6.25    -0.001 C 
ATOM   4712 1HD1 ILE B 155      32.362  36.771  42.396  1.00  0.00     0.000 H 
ATOM   4713 2HD1 ILE B 155      31.912  37.225  40.695  1.00  0.00     0.000 H 
ATOM   4714 3HD1 ILE B 155      31.100  35.895  41.426  1.00  0.00     0.000 H 
ATOM   4715  N   ALA B 156      28.919  34.751  41.929  1.00 13.30    -0.520 N 
ATOM   4716  HN  ALA B 156      29.866  34.769  41.551  1.00  0.00     0.248 HD
ATOM   4717  CA  ALA B 156      28.534  33.678  42.827  1.00 12.04     0.215 C 
ATOM   4718  HA  ALA B 156      27.465  33.422  42.643  1.00  0.00     0.000 H 
ATOM   4719  C   ALA B 156      28.702  34.050  44.276  1.00 13.00     0.526 C 
ATOM   4720  O   ALA B 156      29.806  34.375  44.695  1.00 15.38    -0.500 OA
ATOM   4721  CB  ALA B 156      29.373  32.463  42.572  1.00  7.04     0.031 C 
ATOM   4722  HB1 ALA B 156      29.249  32.187  41.499  1.00  0.00     0.000 H 
ATOM   4723  HB2 ALA B 156      29.141  31.622  43.266  1.00  0.00     0.000 H 
ATOM   4724  HB3 ALA B 156      30.440  32.603  42.863  1.00  0.00     0.000 H 
ATOM   4725  N   LEU B 157      27.601  34.081  44.990  1.00 14.34    -0.520 N 
ATOM   4726  HN  LEU B 157      26.703  33.987  44.515  1.00  0.00     0.248 HD
ATOM   4727  CA  LEU B 157      27.618  34.244  46.425  1.00 18.32     0.198 C 
ATOM   4728  HA  LEU B 157      28.610  34.649  46.735  1.00  0.00     0.000 H 
ATOM   4729  C   LEU B 157      27.405  32.879  47.085  1.00 21.17     0.444 C 
ATOM   4730  O   LEU B 157      28.289  32.446  47.813  1.00 27.03    -0.706 OA
ATOM   4731  CB  LEU B 157      26.538  35.256  46.767  1.00 15.86     0.016 C 
ATOM   4732  HB1 LEU B 157      26.233  35.196  47.838  1.00  0.00     0.000 H 
ATOM   4733  HB2 LEU B 157      25.558  34.995  46.304  1.00  0.00     0.000 H 
ATOM   4734  CG  LEU B 157      26.997  36.656  46.381  1.00 17.11     0.054 C 
ATOM   4735  HG  LEU B 157      27.331  36.627  45.318  1.00  0.00     0.000 H 
ATOM   4736  CD1 LEU B 157      25.877  37.691  46.495  1.00 14.80    -0.014 C 
ATOM   4737 1HD1 LEU B 157      26.213  38.716  46.212  1.00  0.00     0.000 H 
ATOM   4738 2HD1 LEU B 157      25.426  37.683  47.515  1.00  0.00     0.000 H 
ATOM   4739 3HD1 LEU B 157      24.984  37.383  45.902  1.00  0.00     0.000 H 
ATOM   4740  CD2 LEU B 157      28.217  36.940  47.249  1.00 16.31    -0.014 C 
ATOM   4741 1HD2 LEU B 157      28.553  37.965  46.966  1.00  0.00     0.000 H 
ATOM   4742 2HD2 LEU B 157      29.016  36.167  47.164  1.00  0.00     0.000 H 
ATOM   4743 3HD2 LEU B 157      28.028  36.816  48.341  1.00  0.00     0.000 H 
ATOM   4744  OXT LEU B 157      26.408  32.193  46.828  1.00 27.02    -0.706 OA
TER    4745      LEU B 157 
ATOM   4745  N   ARG C   6      17.900  26.574  48.172  1.00 42.17    -0.263 N 
ATOM   4746  HN1 ARG C   6      18.566  26.634  47.402  1.00  0.00     0.312 HD
ATOM   4747  HN2 ARG C   6      16.962  26.324  47.860  1.00  0.00     0.312 HD
ATOM   4748  HN3 ARG C   6      18.067  25.766  48.772  1.00  0.00     0.312 HD
ATOM   4749  CA  ARG C   6      17.929  27.823  48.901  1.00 43.18     0.292 C 
ATOM   4750  HA  ARG C   6      17.719  28.695  48.238  1.00  0.00     0.000 H 
ATOM   4751  C   ARG C   6      19.387  27.796  49.358  1.00 43.67     0.526 C 
ATOM   4752  O   ARG C   6      20.244  28.119  48.535  1.00 40.28    -0.500 OA
ATOM   4753  CB  ARG C   6      16.946  27.734  50.037  1.00 44.61     0.049 C 
ATOM   4754  HB1 ARG C   6      16.968  28.697  50.599  1.00  0.00     0.000 H 
ATOM   4755  HB2 ARG C   6      17.128  26.851  50.693  1.00  0.00     0.000 H 
ATOM   4756  HB3 ARG C   6      15.920  27.461  49.695  1.00  0.00     0.000 H 
ATOM   4757  N   THR C   7      19.689  27.308  50.560  1.00 44.00    -0.520 N 
ATOM   4758  HN  THR C   7      18.938  27.145  51.231  1.00  0.00     0.248 HD
ATOM   4759  CA  THR C   7      21.064  26.999  50.946  1.00 46.76     0.268 C 
ATOM   4760  HA  THR C   7      21.710  27.902  50.844  1.00  0.00     0.000 H 
ATOM   4761  C   THR C   7      21.524  25.896  49.977  1.00 43.43     0.526 C 
ATOM   4762  O   THR C   7      20.722  24.953  49.889  1.00 44.35    -0.500 OA
ATOM   4763  CB  THR C   7      21.033  26.518  52.420  1.00 49.19     0.211 C 
ATOM   4764  HB  THR C   7      20.754  25.439  52.442  1.00  0.00     0.000 H 
ATOM   4765  OG1 THR C   7      20.014  27.276  53.095  1.00 50.57    -0.550 OA
ATOM   4766  HG1 THR C   7      19.995  26.981  53.998  1.00  0.00     0.310 HD
ATOM   4767  CG2 THR C   7      22.390  26.694  53.111  1.00 52.39     0.007 C 
ATOM   4768 1HG2 THR C   7      22.368  26.348  54.171  1.00  0.00     0.000 H 
ATOM   4769 2HG2 THR C   7      22.748  27.747  53.037  1.00  0.00     0.000 H 
ATOM   4770 3HG2 THR C   7      23.204  26.191  52.538  1.00  0.00     0.000 H 
ATOM   4771  N   PRO C   8      22.612  25.828  49.192  1.00 41.90    -0.257 N 
ATOM   4772  CA  PRO C   8      24.003  26.033  49.556  1.00 42.98     0.112 C 
ATOM   4773  HA  PRO C   8      24.218  25.437  50.473  1.00  0.00     0.000 H 
ATOM   4774  C   PRO C   8      24.376  27.489  49.829  1.00 43.50     0.526 C 
ATOM   4775  O   PRO C   8      23.473  28.316  49.928  1.00 45.67    -0.500 OA
ATOM   4776  CB  PRO C   8      24.751  25.402  48.386  1.00 42.04    -0.001 C 
ATOM   4777  HB1 PRO C   8      25.836  25.655  48.331  1.00  0.00     0.000 H 
ATOM   4778  HB2 PRO C   8      24.900  24.300  48.464  1.00  0.00     0.000 H 
ATOM   4779  CG  PRO C   8      23.936  25.848  47.201  1.00 40.81     0.036 C 
ATOM   4780  HG1 PRO C   8      24.167  26.868  46.815  1.00  0.00     0.000 H 
ATOM   4781  HG2 PRO C   8      24.161  25.330  46.240  1.00  0.00     0.000 H 
ATOM   4782  CD  PRO C   8      22.518  25.651  47.741  1.00 42.21     0.084 C 
ATOM   4783  HD1 PRO C   8      21.762  26.314  47.260  1.00  0.00     0.000 H 
ATOM   4784  HD2 PRO C   8      22.058  24.681  47.440  1.00  0.00     0.000 H 
ATOM   4785  N   SER C   9      25.674  27.819  49.960  1.00 41.66    -0.520 N 
ATOM   4786  HN  SER C   9      26.369  27.089  49.805  1.00  0.00     0.248 HD
ATOM   4787  CA  SER C   9      26.153  29.153  50.309  1.00 41.28     0.292 C 
ATOM   4788  HA  SER C   9      27.255  29.099  50.468  1.00  0.00     0.000 H 
ATOM   4789  C   SER C   9      25.514  29.704  51.576  1.00 40.04     0.526 C 
ATOM   4790  O   SER C   9      24.618  30.531  51.435  1.00 42.69    -0.500 OA
ATOM   4791  CB  SER C   9      25.882  30.103  49.139  1.00 43.13     0.194 C 
ATOM   4792  HB1 SER C   9      26.286  31.124  49.336  1.00  0.00     0.000 H 
ATOM   4793  HB2 SER C   9      24.800  30.361  49.061  1.00  0.00     0.000 H 
ATOM   4794  OG  SER C   9      26.385  29.565  47.915  1.00 47.90    -0.550 OA
ATOM   4795  HG  SER C   9      26.217  30.154  47.189  1.00  0.00     0.310 HD
ATOM   4796  N   ASP C  10      25.831  29.320  52.833  1.00 38.16    -0.520 N 
ATOM   4797  HN  ASP C  10      26.533  28.598  52.995  1.00  0.00     0.248 HD
ATOM   4798  CA  ASP C  10      25.143  29.964  53.962  1.00 37.35     0.246 C 
ATOM   4799  HA  ASP C  10      24.044  29.904  53.781  1.00  0.00     0.000 H 
ATOM   4800  C   ASP C  10      25.527  31.419  54.050  1.00 34.41     0.526 C 
ATOM   4801  O   ASP C  10      26.582  31.902  54.459  1.00 38.80    -0.500 OA
ATOM   4802  CB  ASP C  10      25.428  29.447  55.403  1.00 40.01    -0.208 C 
ATOM   4803  HB1 ASP C  10      26.526  29.355  55.573  1.00  0.00     0.000 H 
ATOM   4804  HB2 ASP C  10      25.129  28.377  55.498  1.00  0.00     0.000 H 
ATOM   4805  CG  ASP C  10      24.772  30.298  56.534  1.00 42.13     0.620 C 
ATOM   4806  OD1 ASP C  10      25.414  30.498  57.577  1.00 41.87    -0.706 OA
ATOM   4807  OD2 ASP C  10      23.643  30.787  56.371  1.00 43.14    -0.706 OA
ATOM   4808  N   LYS C  11      24.487  32.016  53.580  1.00 28.26    -0.520 N 
ATOM   4809  HN  LYS C  11      23.741  31.433  53.200  1.00  0.00     0.248 HD
ATOM   4810  CA  LYS C  11      24.300  33.415  53.550  1.00 22.78     0.227 C 
ATOM   4811  HA  LYS C  11      24.974  33.961  54.251  1.00  0.00     0.000 H 
ATOM   4812  C   LYS C  11      22.860  33.387  54.014  1.00 22.07     0.526 C 
ATOM   4813  O   LYS C  11      22.089  32.578  53.503  1.00 24.37    -0.500 OA
ATOM   4814  CB  LYS C  11      24.434  33.870  52.142  1.00 16.10     0.039 C 
ATOM   4815  HB1 LYS C  11      23.610  34.561  51.849  1.00  0.00     0.000 H 
ATOM   4816  HB2 LYS C  11      24.226  33.048  51.418  1.00  0.00     0.000 H 
ATOM   4817  CG  LYS C  11      25.780  34.482  51.917  1.00 14.79     0.053 C 
ATOM   4818  HG1 LYS C  11      26.057  35.118  52.790  1.00  0.00     0.000 H 
ATOM   4819  HG2 LYS C  11      25.714  35.256  51.117  1.00  0.00     0.000 H 
ATOM   4820  CD  LYS C  11      26.909  33.516  51.606  1.00 15.52     0.048 C 
ATOM   4821  HD1 LYS C  11      26.996  32.716  52.377  1.00  0.00     0.000 H 
ATOM   4822  HD2 LYS C  11      26.675  32.872  50.726  1.00  0.00     0.000 H 
ATOM   4823  CE  LYS C  11      28.214  34.273  51.424  1.00 14.31     0.218 C 
ATOM   4824  HE1 LYS C  11      29.051  33.613  51.097  1.00  0.00     0.000 H 
ATOM   4825  HE2 LYS C  11      28.198  34.949  50.537  1.00  0.00     0.000 H 
ATOM   4826  NZ  LYS C  11      28.509  34.979  52.660  1.00 21.42    -0.272 N 
ATOM   4827  HZ1 LYS C  11      29.385  35.487  52.538  1.00  0.00     0.311 HD
ATOM   4828  HZ2 LYS C  11      28.524  34.361  53.471  1.00  0.00     0.311 HD
ATOM   4829  HZ3 LYS C  11      27.743  35.583  52.960  1.00  0.00     0.311 HD
ATOM   4830  N   PRO C  12      22.428  34.187  54.997  1.00 19.13    -0.257 N 
ATOM   4831  CA  PRO C  12      21.169  34.918  54.927  1.00 15.78     0.112 C 
ATOM   4832  HA  PRO C  12      20.319  34.262  55.228  1.00  0.00     0.000 H 
ATOM   4833  C   PRO C  12      21.010  35.364  53.487  1.00 13.23     0.526 C 
ATOM   4834  O   PRO C  12      21.935  35.898  52.846  1.00 17.95    -0.500 OA
ATOM   4835  CB  PRO C  12      21.361  36.027  55.931  1.00 14.71    -0.001 C 
ATOM   4836  HB1 PRO C  12      20.434  36.567  56.235  1.00  0.00     0.000 H 
ATOM   4837  HB2 PRO C  12      21.880  36.937  55.550  1.00  0.00     0.000 H 
ATOM   4838  CG  PRO C  12      22.078  35.280  57.040  1.00 12.42     0.036 C 
ATOM   4839  HG1 PRO C  12      21.394  34.768  57.756  1.00  0.00     0.000 H 
ATOM   4840  HG2 PRO C  12      22.570  35.945  57.788  1.00  0.00     0.000 H 
ATOM   4841  CD  PRO C  12      23.041  34.337  56.321  1.00 17.59     0.084 C 
ATOM   4842  HD1 PRO C  12      24.103  34.678  56.307  1.00  0.00     0.000 H 
ATOM   4843  HD2 PRO C  12      23.238  33.378  56.854  1.00  0.00     0.000 H 
ATOM   4844  N   VAL C  13      19.869  35.036  52.946  1.00 12.02    -0.520 N 
ATOM   4845  HN  VAL C  13      19.179  34.532  53.502  1.00  0.00     0.248 HD
ATOM   4846  CA  VAL C  13      19.566  35.370  51.586  1.00 12.40     0.201 C 
ATOM   4847  HA  VAL C  13      20.056  36.328  51.295  1.00  0.00     0.000 H 
ATOM   4848  C   VAL C  13      18.071  35.527  51.630  1.00 15.55     0.526 C 
ATOM   4849  O   VAL C  13      17.396  34.818  52.398  1.00 17.45    -0.500 OA
ATOM   4850  CB  VAL C  13      20.033  34.206  50.660  1.00 13.59     0.033 C 
ATOM   4851  HB  VAL C  13      21.148  34.194  50.656  1.00  0.00     0.000 H 
ATOM   4852  CG1 VAL C  13      19.551  32.866  51.176  1.00 11.02     0.006 C 
ATOM   4853 1HG1 VAL C  13      19.897  32.654  52.215  1.00  0.00     0.000 H 
ATOM   4854 2HG1 VAL C  13      19.841  32.043  50.482  1.00  0.00     0.000 H 
ATOM   4855 3HG1 VAL C  13      18.442  32.784  51.100  1.00  0.00     0.000 H 
ATOM   4856  CG2 VAL C  13      19.562  34.494  49.247  1.00 14.26     0.006 C 
ATOM   4857 1HG2 VAL C  13      19.917  35.480  48.867  1.00  0.00     0.000 H 
ATOM   4858 2HG2 VAL C  13      18.453  34.412  49.171  1.00  0.00     0.000 H 
ATOM   4859 3HG2 VAL C  13      19.852  33.671  48.553  1.00  0.00     0.000 H 
ATOM   4860  N   ALA C  14      17.570  36.493  50.881  1.00 14.59    -0.520 N 
ATOM   4861  HN  ALA C  14      18.200  37.149  50.421  1.00  0.00     0.248 HD
ATOM   4862  CA  ALA C  14      16.136  36.635  50.703  1.00 13.15     0.215 C 
ATOM   4863  HA  ALA C  14      15.664  35.630  50.598  1.00  0.00     0.000 H 
ATOM   4864  C   ALA C  14      16.001  37.398  49.426  1.00 11.88     0.526 C 
ATOM   4865  O   ALA C  14      16.828  38.249  49.084  1.00 13.22    -0.500 OA
ATOM   4866  CB  ALA C  14      15.415  37.444  51.802  1.00 10.69     0.031 C 
ATOM   4867  HB1 ALA C  14      15.516  36.874  52.755  1.00  0.00     0.000 H 
ATOM   4868  HB2 ALA C  14      14.356  37.679  51.545  1.00  0.00     0.000 H 
ATOM   4869  HB3 ALA C  14      15.782  38.494  51.881  1.00  0.00     0.000 H 
ATOM   4870  N   HIS C  15      15.027  36.935  48.692  1.00 11.23    -0.520 N 
ATOM   4871  HN  HIS C  15      14.512  36.125  49.038  1.00  0.00     0.248 HD
ATOM   4872  CA  HIS C  15      14.632  37.491  47.428  1.00 14.84     0.195 C 
ATOM   4873  HA  HIS C  15      14.783  38.595  47.392  1.00  0.00     0.000 H 
ATOM   4874  C   HIS C  15      13.184  37.127  47.502  1.00 15.83     0.526 C 
ATOM   4875  O   HIS C  15      12.857  35.961  47.376  1.00 12.32    -0.500 OA
ATOM   4876  CB  HIS C  15      15.218  36.795  46.205  1.00 16.10     0.211 C 
ATOM   4877  HB1 HIS C  15      16.326  36.673  46.238  1.00  0.00     0.000 H 
ATOM   4878  HB2 HIS C  15      14.976  35.709  46.140  1.00  0.00     0.000 H 
ATOM   4879  CG  HIS C  15      14.722  37.608  45.032  1.00 16.87     0.103 A 
ATOM   4880  ND1 HIS C  15      15.166  38.787  44.657  1.00 17.14    -0.613 N 
ATOM   4881  HD1 HIS C  15      15.971  39.278  45.047  1.00  0.00     0.478 HD
ATOM   4882  CD2 HIS C  15      13.642  37.315  44.254  1.00 18.02     0.353 A 
ATOM   4883  HD2 HIS C  15      13.029  36.399  44.288  1.00  0.00     0.000 H 
ATOM   4884  CE1 HIS C  15      14.398  39.215  43.702  1.00 16.68     0.719 A 
ATOM   4885  HE1 HIS C  15      14.509  40.178  43.175  1.00  0.00     0.000 H 
ATOM   4886  NE2 HIS C  15      13.481  38.332  43.466  1.00 15.42    -0.686 N 
ATOM   4887  HE2 HIS C  15      12.744  38.423  42.767  1.00  0.00     0.486 HD
ATOM   4888  N   VAL C  16      12.350  38.141  47.637  1.00 21.09    -0.520 N 
ATOM   4889  HN  VAL C  16      12.723  39.084  47.526  1.00  0.00     0.248 HD
ATOM   4890  CA  VAL C  16      10.938  38.000  47.933  1.00 23.45     0.201 C 
ATOM   4891  HA  VAL C  16      10.651  36.925  47.860  1.00  0.00     0.000 H 
ATOM   4892  C   VAL C  16      10.126  38.813  46.912  1.00 26.40     0.526 C 
ATOM   4893  O   VAL C  16      10.510  39.909  46.481  1.00 28.35    -0.500 OA
ATOM   4894  CB  VAL C  16      10.915  38.440  49.431  1.00 24.21     0.033 C 
ATOM   4895  HB  VAL C  16      11.963  38.345  49.801  1.00  0.00     0.000 H 
ATOM   4896  CG1 VAL C  16      10.510  39.928  49.643  1.00 24.95     0.006 C 
ATOM   4897 1HG1 VAL C  16      10.494  40.242  50.713  1.00  0.00     0.000 H 
ATOM   4898 2HG1 VAL C  16       9.530  40.141  49.156  1.00  0.00     0.000 H 
ATOM   4899 3HG1 VAL C  16      11.167  40.603  49.046  1.00  0.00     0.000 H 
ATOM   4900  CG2 VAL C  16      10.123  37.360  50.122  1.00 24.11     0.006 C 
ATOM   4901 1HG2 VAL C  16      10.107  37.674  51.192  1.00  0.00     0.000 H 
ATOM   4902 2HG2 VAL C  16      10.513  36.329  49.955  1.00  0.00     0.000 H 
ATOM   4903 3HG2 VAL C  16       9.114  37.181  49.683  1.00  0.00     0.000 H 
ATOM   4904  N   VAL C  17       9.033  38.220  46.444  1.00 29.90    -0.520 N 
ATOM   4905  HN  VAL C  17       8.765  37.324  46.850  1.00  0.00     0.248 HD
ATOM   4906  CA  VAL C  17       8.185  38.773  45.378  1.00 30.35     0.201 C 
ATOM   4907  HA  VAL C  17       8.779  39.523  44.804  1.00  0.00     0.000 H 
ATOM   4908  C   VAL C  17       6.956  39.459  45.943  1.00 30.41     0.526 C 
ATOM   4909  O   VAL C  17       6.597  39.133  47.082  1.00 33.83    -0.500 OA
ATOM   4910  CB  VAL C  17       7.672  37.694  44.396  1.00 32.65     0.033 C 
ATOM   4911  HB  VAL C  17       6.701  38.042  43.973  1.00  0.00     0.000 H 
ATOM   4912  CG1 VAL C  17       8.663  37.542  43.248  1.00 33.18     0.006 C 
ATOM   4913 1HG1 VAL C  17       8.844  38.497  42.701  1.00  0.00     0.000 H 
ATOM   4914 2HG1 VAL C  17       8.341  36.737  42.547  1.00  0.00     0.000 H 
ATOM   4915 3HG1 VAL C  17       9.622  37.099  43.605  1.00  0.00     0.000 H 
ATOM   4916  CG2 VAL C  17       7.420  36.367  45.156  1.00 35.26     0.006 C 
ATOM   4917 1HG2 VAL C  17       6.695  36.478  45.996  1.00  0.00     0.000 H 
ATOM   4918 2HG2 VAL C  17       8.379  35.924  45.513  1.00  0.00     0.000 H 
ATOM   4919 3HG2 VAL C  17       7.098  35.562  44.455  1.00  0.00     0.000 H 
ATOM   4920  N   ALA C  18       6.334  40.413  45.232  1.00 26.84    -0.520 N 
ATOM   4921  HN  ALA C  18       6.694  40.677  44.315  1.00  0.00     0.248 HD
ATOM   4922  CA  ALA C  18       5.145  41.076  45.762  1.00 26.65     0.215 C 
ATOM   4923  HA  ALA C  18       5.304  41.307  46.841  1.00  0.00     0.000 H 
ATOM   4924  C   ALA C  18       3.950  40.161  45.620  1.00 28.11     0.526 C 
ATOM   4925  O   ALA C  18       4.133  38.967  45.359  1.00 29.80    -0.500 OA
ATOM   4926  CB  ALA C  18       4.829  42.361  45.017  1.00 26.41     0.031 C 
ATOM   4927  HB1 ALA C  18       5.710  43.036  45.122  1.00  0.00     0.000 H 
ATOM   4928  HB2 ALA C  18       3.877  42.835  45.353  1.00  0.00     0.000 H 
ATOM   4929  HB3 ALA C  18       4.539  42.187  43.955  1.00  0.00     0.000 H 
ATOM   4930  N   ASN C  19       2.711  40.636  45.738  1.00 28.86    -0.520 N 
ATOM   4931  HN  ASN C  19       2.541  41.626  45.913  1.00  0.00     0.248 HD
ATOM   4932  CA  ASN C  19       1.609  39.697  45.609  1.00 32.47     0.217 C 
ATOM   4933  HA  ASN C  19       1.995  38.776  45.114  1.00  0.00     0.000 H 
ATOM   4934  C   ASN C  19       0.471  40.235  44.776  1.00 33.38     0.526 C 
ATOM   4935  O   ASN C  19      -0.161  41.216  45.188  1.00 32.46    -0.500 OA
ATOM   4936  CB  ASN C  19       1.126  39.319  47.000  1.00 32.42     0.003 C 
ATOM   4937  HB1 ASN C  19       0.963  40.234  47.616  1.00  0.00     0.000 H 
ATOM   4938  HB2 ASN C  19       1.949  38.842  47.581  1.00  0.00     0.000 H 
ATOM   4939  CG  ASN C  19      -0.106  38.445  47.018  1.00 31.95     0.675 C 
ATOM   4940  OD1 ASN C  19      -1.203  38.918  46.723  1.00 32.97    -0.470 OA
ATOM   4941  ND2 ASN C  19       0.044  37.190  47.423  1.00 30.85    -0.867 N 
ATOM   4942 1HD2 ASN C  19      -0.788  36.600  47.435  1.00  0.00     0.344 HD
ATOM   4943 2HD2 ASN C  19       0.953  36.798  47.668  1.00  0.00     0.344 HD
ATOM   4944  N   PRO C  20       0.183  39.605  43.619  1.00 35.64    -0.257 N 
ATOM   4945  CA  PRO C  20      -0.828  40.026  42.649  1.00 37.72     0.112 C 
ATOM   4946  HA  PRO C  20      -0.785  41.135  42.544  1.00  0.00     0.000 H 
ATOM   4947  C   PRO C  20      -2.241  39.625  43.035  1.00 40.04     0.526 C 
ATOM   4948  O   PRO C  20      -3.026  39.161  42.204  1.00 40.20    -0.500 OA
ATOM   4949  CB  PRO C  20      -0.395  39.401  41.357  1.00 36.52    -0.001 C 
ATOM   4950  HB1 PRO C  20      -1.181  39.344  40.568  1.00  0.00     0.000 H 
ATOM   4951  HB2 PRO C  20       0.314  40.009  40.748  1.00  0.00     0.000 H 
ATOM   4952  CG  PRO C  20       0.139  38.071  41.833  1.00 37.06     0.036 C 
ATOM   4953  HG1 PRO C  20       0.735  37.511  41.075  1.00  0.00     0.000 H 
ATOM   4954  HG2 PRO C  20      -0.636  37.282  41.972  1.00  0.00     0.000 H 
ATOM   4955  CD  PRO C  20       0.906  38.440  43.100  1.00 36.71     0.084 C 
ATOM   4956  HD1 PRO C  20       1.997  38.608  42.945  1.00  0.00     0.000 H 
ATOM   4957  HD2 PRO C  20       1.017  37.605  43.830  1.00  0.00     0.000 H 
ATOM   4958  N   GLN C  21      -2.537  39.720  44.329  1.00 41.30    -0.520 N 
ATOM   4959  HN  GLN C  21      -1.808  40.014  44.979  1.00  0.00     0.248 HD
ATOM   4960  CA  GLN C  21      -3.837  39.425  44.841  1.00 40.11     0.210 C 
ATOM   4961  HA  GLN C  21      -4.560  39.293  44.003  1.00  0.00     0.000 H 
ATOM   4962  C   GLN C  21      -4.201  40.644  45.657  1.00 40.68     0.526 C 
ATOM   4963  O   GLN C  21      -5.351  41.082  45.550  1.00 42.39    -0.500 OA
ATOM   4964  CB  GLN C  21      -3.788  38.162  45.698  1.00 39.07     0.053 C 
ATOM   4965  HB1 GLN C  21      -4.618  38.178  46.443  1.00  0.00     0.000 H 
ATOM   4966  HB2 GLN C  21      -2.906  38.201  46.379  1.00  0.00     0.000 H 
ATOM   4967  CG  GLN C  21      -3.798  36.824  44.933  1.00 40.79    -0.043 C 
ATOM   4968  HG1 GLN C  21      -4.823  36.665  44.524  1.00  0.00     0.000 H 
ATOM   4969  HG2 GLN C  21      -3.719  35.997  45.677  1.00  0.00     0.000 H 
ATOM   4970  CD  GLN C  21      -2.784  36.553  43.805  1.00 40.22     0.675 C 
ATOM   4971  OE1 GLN C  21      -1.560  36.558  43.992  1.00 37.07    -0.470 OA
ATOM   4972  NE2 GLN C  21      -3.250  36.323  42.577  1.00 38.22    -0.867 N 
ATOM   4973 1HE2 GLN C  21      -4.258  36.319  42.423  1.00  0.00     0.344 HD
ATOM   4974 2HE2 GLN C  21      -2.579  36.144  41.830  1.00  0.00     0.344 HD
ATOM   4975  N   ALA C  22      -3.334  41.325  46.413  1.00 41.82    -0.520 N 
ATOM   4976  HN  ALA C  22      -2.341  41.093  46.407  1.00  0.00     0.248 HD
ATOM   4977  CA  ALA C  22      -3.848  42.418  47.254  1.00 43.12     0.215 C 
ATOM   4978  HA  ALA C  22      -4.759  42.043  47.776  1.00  0.00     0.000 H 
ATOM   4979  C   ALA C  22      -4.238  43.704  46.498  1.00 43.33     0.526 C 
ATOM   4980  O   ALA C  22      -3.504  44.687  46.664  1.00 41.53    -0.500 OA
ATOM   4981  CB  ALA C  22      -2.778  42.692  48.323  1.00 43.18     0.031 C 
ATOM   4982  HB1 ALA C  22      -3.167  43.520  48.960  1.00  0.00     0.000 H 
ATOM   4983  HB2 ALA C  22      -1.771  42.903  47.894  1.00  0.00     0.000 H 
ATOM   4984  HB3 ALA C  22      -2.495  41.784  48.905  1.00  0.00     0.000 H 
ATOM   4985  N   GLU C  23      -5.423  43.742  45.803  1.00 42.23    -0.520 N 
ATOM   4986  HN  GLU C  23      -6.108  43.013  46.001  1.00  0.00     0.248 HD
ATOM   4987  CA  GLU C  23      -5.783  44.762  44.787  1.00 44.53     0.246 C 
ATOM   4988  HA  GLU C  23      -5.667  44.251  43.803  1.00  0.00     0.000 H 
ATOM   4989  C   GLU C  23      -4.987  46.065  44.663  1.00 45.16     0.526 C 
ATOM   4990  O   GLU C  23      -4.790  46.445  43.497  1.00 44.06    -0.500 OA
ATOM   4991  CB  GLU C  23      -7.252  45.267  44.817  1.00 43.85     0.000 C 
ATOM   4992  HB1 GLU C  23      -7.415  46.180  45.436  1.00  0.00     0.000 H 
ATOM   4993  HB2 GLU C  23      -7.954  44.615  45.387  1.00  0.00     0.000 H 
ATOM   4994  CG  GLU C  23      -7.607  45.437  43.297  1.00 46.49    -0.208 C 
ATOM   4995  HG1 GLU C  23      -6.651  45.616  42.752  1.00  0.00     0.000 H 
ATOM   4996  HG2 GLU C  23      -7.918  44.436  42.916  1.00  0.00     0.000 H 
ATOM   4997  CD  GLU C  23      -8.636  46.469  42.770  1.00 48.53     0.620 C 
ATOM   4998  OE1 GLU C  23      -8.335  47.675  42.701  1.00 47.94    -0.706 OA
[truncated: 229,914 more chars]
