# Supplementary material for: A Network Pharmacology-Based Study on Irritable Bowel Syndrome Prevention and Treatment Utilizing Shenling Baizhu Powder
Source: Biomed Res Int. 2021 Nov 23;2021:4579850. doi: 10.1155/2021/4579850 (PMC8632384; doi:10.1155/2021/4579850)
Supplement: Supplementary Materials — Please find detailed data in the supplementary file, including the original data of SymMap, metabolomics, and molecular docking of Shenling Baizhu powder. “Shenling Baizhu powder SymMap” includes all herbal targets and combined targets. “Shenling Baizhu powder metabolomics” includes two-dimensional structural data analysis. “Molecular docking” involves molecule-target docking and the results. [file 4579850.f1.zip › Data in brief/3. Molecular docking/Molecular-targets for docking/49.n-cis-Feruloyltyramine.mol2]

@<TRIPOS>MOLECULE
Unnamed
42 43 1 0 0
SMALL
USER_CHARGES


@<TRIPOS>ATOM
      1 O          12.2610    0.2237   -7.2359 O.3       1     ****    0.0000
      2 O           2.8372   -0.2141    2.3978 O.3       1     ****    0.0000
      3 O          10.7250    3.6380   -1.8077 O.2       1     ****    0.0000
      4 O          12.3341    2.8612   -7.7540 O.3       1     ****    0.0000
      5 N           9.2475    3.2327   -0.2600 N.am      1     ****    0.0000
      6 C           6.8536    2.5886   -0.3248 C.3       1     ****    0.0000
      7 C           8.1888    2.4865    0.4276 C.3       1     ****    0.0000
      8 C           5.7662    1.8351    0.4107 C.ar      1     ****    0.0000
      9 C           5.6051    0.5130    0.2294 C.ar      1     ****    0.0000
     10 C           4.9389    2.4618    1.2647 C.ar      1     ****    0.0000
     11 C           4.6438   -0.1587    0.8811 C.ar      1     ****    0.0000
     12 C           3.9792    1.7848    1.9135 C.ar      1     ****    0.0000
     13 C           9.9199    2.8455   -1.3869 C.2       1     ****    0.0000
     14 C          10.6491    1.5928   -4.2370 C.ar      1     ****    0.0000
     15 C           3.8127    0.4634    1.7346 C.ar      1     ****    0.0000
     16 C          10.0807    1.0990   -3.1147 C.2       1     ****    0.0000
     17 C           9.6887    1.6207   -1.9343 C.2       1     ****    0.0000
     18 C          11.1519    0.7305   -5.1473 C.ar      1     ****    0.0000
     19 C          11.7259    1.0942   -6.3136 C.ar      1     ****    0.0000
     20 C          10.6772    2.8904   -4.5852 C.ar      1     ****    0.0000
     21 C          11.7777    2.4126   -6.5947 C.ar      1     ****    0.0000
     22 C          11.2422    3.2893   -5.7323 C.ar      1     ****    0.0000
     23 C          12.2392   -1.1606   -6.9740 C.3       1     ****    0.0000
     24 H           6.5704    3.6603   -0.4456 H         1     ****    0.0000
     25 H           6.9498    2.1816   -1.3576 H         1     ****    0.0000
     26 H           8.4897    1.4354    0.6317 H         1     ****    0.0000
     27 H           8.0631    2.9563    1.4321 H         1     ****    0.0000
     28 H           9.4821    4.1702    0.0647 H         1     ****    0.0000
     29 H           6.2713   -0.0307   -0.4610 H         1     ****    0.0000
     30 H           5.0474    3.5448    1.4406 H         1     ****    0.0000
     31 H           4.5323   -1.2435    0.7157 H         1     ****    0.0000
     32 H           3.3135    2.3225    2.6095 H         1     ****    0.0000
     33 H           9.8485    0.0147   -3.1673 H         1     ****    0.0000
     34 H           9.0766    0.9245   -1.3347 H         1     ****    0.0000
     35 H          11.1082   -0.3450   -4.9129 H         1     ****    0.0000
     36 H          10.1845    3.6721   -3.9921 H         1     ****    0.0000
     37 H          11.2409    4.3618   -5.9923 H         1     ****    0.0000
     38 H           2.3452    0.4063    2.9597 H         1     ****    0.0000
     39 H          12.2570    3.8283   -7.7864 H         1     ****    0.0000
     40 H          12.7213   -1.6758   -7.8351 H         1     ****    0.0000
     41 H          12.8299   -1.3923   -6.0598 H         1     ****    0.0000
     42 H          11.1906   -1.5255   -6.8984 H         1     ****    0.0000
@<TRIPOS>BOND
     1     1    19     1
     2     1    23     1
     3     2    15     1
     4     2    38     1
     5     3    13     2
     6     4    21     1
     7     4    39     1
     8     5     7     1
     9     5    13     1
    10     5    28     1
    11     6     7     1
    12     6     8     1
    13     6    24     1
    14     6    25     1
    15     7    26     1
    16     7    27     1
    17     8     9     1
    18     8    10     2
    19     9    11     2
    20     9    29     1
    21    10    12     1
    22    10    30     1
    23    11    15     1
    24    11    31     1
    25    12    15     2
    26    12    32     1
    27    13    17     1
    28    14    16     1
    29    14    18     1
    30    14    20     2
    31    16    17     2
    32    16    33     1
    33    17    34     1
    34    18    19     2
    35    18    35     1
    36    19    21     1
    37    20    22     1
    38    20    36     1
    39    21    22     2
    40    22    37     1
    41    23    40     1
    42    23    41     1
    43    23    42     1
