# Supplementary material for: A Network Pharmacology-Based Study on Irritable Bowel Syndrome Prevention and Treatment Utilizing Shenling Baizhu Powder
Source: Biomed Res Int. 2021 Nov 23;2021:4579850. doi: 10.1155/2021/4579850 (PMC8632384; doi:10.1155/2021/4579850)
Supplement: Supplementary Materials — Please find detailed data in the supplementary file, including the original data of SymMap, metabolomics, and molecular docking of Shenling Baizhu powder. “Shenling Baizhu powder SymMap” includes all herbal targets and combined targets. “Shenling Baizhu powder metabolomics” includes two-dimensional structural data analysis. “Molecular docking” involves molecule-target docking and the results. [file 4579850.f1.zip › Data in brief/3. Molecular docking/Molecular-targets for docking/49.n-cis-Feruloyltyramine.sdf]

6440659
  -OEChem-07012002192D

 42 43  0     0  0  0  0  0  0999 V2000
    2.8660   -1.4050    0.0000 O   0  0  0  0  0  0  0  0  0  0  0  0
   12.3923    0.0950    0.0000 O   0  0  0  0  0  0  0  0  0  0  0  0
    6.3301    0.5950    0.0000 O   0  0  0  0  0  0  0  0  0  0  0  0
    4.5981   -2.4050    0.0000 O   0  0  0  0  0  0  0  0  0  0  0  0
    7.1962    2.0950    0.0000 N   0  0  0  0  0  0  0  0  0  0  0  0
    8.9282    2.0950    0.0000 C   0  0  0  0  0  0  0  0  0  0  0  0
    8.0622    1.5950    0.0000 C   0  0  0  0  0  0  0  0  0  0  0  0
    9.7942    1.5950    0.0000 C   0  0  0  0  0  0  0  0  0  0  0  0
   10.6603    2.0950    0.0000 C   0  0  0  0  0  0  0  0  0  0  0  0
    9.7942    0.5950    0.0000 C   0  0  0  0  0  0  0  0  0  0  0  0
   11.5263    1.5950    0.0000 C   0  0  0  0  0  0  0  0  0  0  0  0
   10.6603    0.0950    0.0000 C   0  0  0  0  0  0  0  0  0  0  0  0
    6.3301    1.5950    0.0000 C   0  0  0  0  0  0  0  0  0  0  0  0
    4.5981    0.5950    0.0000 C   0  0  0  0  0  0  0  0  0  0  0  0
   11.5263    0.5950    0.0000 C   0  0  0  0  0  0  0  0  0  0  0  0
    4.5981    1.5950    0.0000 C   0  0  0  0  0  0  0  0  0  0  0  0
    5.4641    2.0950    0.0000 C   0  0  0  0  0  0  0  0  0  0  0  0
    3.7320    0.0950    0.0000 C   0  0  0  0  0  0  0  0  0  0  0  0
    3.7320   -0.9050    0.0000 C   0  0  0  0  0  0  0  0  0  0  0  0
    5.4641    0.0950    0.0000 C   0  0  0  0  0  0  0  0  0  0  0  0
    4.5981   -1.4050    0.0000 C   0  0  0  0  0  0  0  0  0  0  0  0
    5.4641   -0.9050    0.0000 C   0  0  0  0  0  0  0  0  0  0  0  0
    2.0000   -0.9050    0.0000 C   0  0  0  0  0  0  0  0  0  0  0  0
    9.3267    2.5700    0.0000 H   0  0  0  0  0  0  0  0  0  0  0  0
    8.5297    2.5700    0.0000 H   0  0  0  0  0  0  0  0  0  0  0  0
    7.6636    1.1200    0.0000 H   0  0  0  0  0  0  0  0  0  0  0  0
    8.4607    1.1200    0.0000 H   0  0  0  0  0  0  0  0  0  0  0  0
    7.1962    2.7150    0.0000 H   0  0  0  0  0  0  0  0  0  0  0  0
   10.6603    2.7150    0.0000 H   0  0  0  0  0  0  0  0  0  0  0  0
    9.2573    0.2850    0.0000 H   0  0  0  0  0  0  0  0  0  0  0  0
   12.0632    1.9050    0.0000 H   0  0  0  0  0  0  0  0  0  0  0  0
   10.6603   -0.5250    0.0000 H   0  0  0  0  0  0  0  0  0  0  0  0
    4.0611    1.9050    0.0000 H   0  0  0  0  0  0  0  0  0  0  0  0
    5.4641    2.7150    0.0000 H   0  0  0  0  0  0  0  0  0  0  0  0
    3.1951    0.4050    0.0000 H   0  0  0  0  0  0  0  0  0  0  0  0
    6.0010    0.4050    0.0000 H   0  0  0  0  0  0  0  0  0  0  0  0
    6.0010   -1.2150    0.0000 H   0  0  0  0  0  0  0  0  0  0  0  0
   12.9292    0.4050    0.0000 H   0  0  0  0  0  0  0  0  0  0  0  0
    5.1350   -2.7150    0.0000 H   0  0  0  0  0  0  0  0  0  0  0  0
    2.3100   -0.3681    0.0000 H   0  0  0  0  0  0  0  0  0  0  0  0
    1.4631   -0.5950    0.0000 H   0  0  0  0  0  0  0  0  0  0  0  0
    1.6900   -1.4419    0.0000 H   0  0  0  0  0  0  0  0  0  0  0  0
  1 19  1  0  0  0  0
  1 23  1  0  0  0  0
  2 15  1  0  0  0  0
  2 38  1  0  0  0  0
  3 13  2  0  0  0  0
  4 21  1  0  0  0  0
  4 39  1  0  0  0  0
  5  7  1  0  0  0  0
  5 13  1  0  0  0  0
  5 28  1  0  0  0  0
  6  7  1  0  0  0  0
  6  8  1  0  0  0  0
  6 24  1  0  0  0  0
  6 25  1  0  0  0  0
  7 26  1  0  0  0  0
  7 27  1  0  0  0  0
  8  9  2  0  0  0  0
  8 10  1  0  0  0  0
  9 11  1  0  0  0  0
  9 29  1  0  0  0  0
 10 12  2  0  0  0  0
 10 30  1  0  0  0  0
 11 15  2  0  0  0  0
 11 31  1  0  0  0  0
 12 15  1  0  0  0  0
 12 32  1  0  0  0  0
 13 17  1  0  0  0  0
 14 16  1  0  0  0  0
 14 18  2  0  0  0  0
 14 20  1  0  0  0  0
 16 17  2  0  0  0  0
 16 33  1  0  0  0  0
 17 34  1  0  0  0  0
 18 19  1  0  0  0  0
 18 35  1  0  0  0  0
 19 21  2  0  0  0  0
 20 22  2  0  0  0  0
 20 36  1  0  0  0  0
 21 22  1  0  0  0  0
 22 37  1  0  0  0  0
 23 40  1  0  0  0  0
 23 41  1  0  0  0  0
 23 42  1  0  0  0  0
M  END
> <PUBCHEM_COMPOUND_CID>
6440659

> <PUBCHEM_COMPOUND_CANONICALIZED>
1

> <PUBCHEM_CACTVS_COMPLEXITY>
391

> <PUBCHEM_CACTVS_HBOND_ACCEPTOR>
4

> <PUBCHEM_CACTVS_HBOND_DONOR>
3

> <PUBCHEM_CACTVS_ROTATABLE_BOND>
6

> <PUBCHEM_CACTVS_SUBSKEYS>
AAADceB6OAAAAAAAAAAAAAAAAAAAAAAAAAAwYAAAAAAAAAABQAAAHgAQCAAADATBmAYyBoLABgCIAiFSEACCCAAgIAAIiIAOiMgNJiKGsRuEcCMk1hGLuYeQwJAOIAABAAAAQABAAAIAAACAAAAAAAAAAA==

> <PUBCHEM_IUPAC_OPENEYE_NAME>
(Z)-3-(4-hydroxy-3-methoxy-phenyl)-N-[2-(4-hydroxyphenyl)ethyl]prop-2-enamide

> <PUBCHEM_IUPAC_CAS_NAME>
(Z)-3-(4-hydroxy-3-methoxyphenyl)-N-[2-(4-hydroxyphenyl)ethyl]-2-propenamide

> <PUBCHEM_IUPAC_NAME_MARKUP>
(<I>Z</I>)-3-(4-hydroxy-3-methoxyphenyl)-<I>N</I>-[2-(4-hydroxyphenyl)ethyl]prop-2-enamide

> <PUBCHEM_IUPAC_NAME>
(Z)-3-(4-hydroxy-3-methoxyphenyl)-N-[2-(4-hydroxyphenyl)ethyl]prop-2-enamide

> <PUBCHEM_IUPAC_SYSTEMATIC_NAME>
(Z)-N-[2-(4-hydroxyphenyl)ethyl]-3-(3-methoxy-4-oxidanyl-phenyl)prop-2-enamide

> <PUBCHEM_IUPAC_TRADITIONAL_NAME>
(Z)-3-(4-hydroxy-3-methoxy-phenyl)-N-[2-(4-hydroxyphenyl)ethyl]acrylamide

> <PUBCHEM_IUPAC_INCHI>
InChI=1S/C18H19NO4/c1-23-17-12-14(4-8-16(17)21)5-9-18(22)19-11-10-13-2-6-15(20)7-3-13/h2-9,12,20-21H,10-11H2,1H3,(H,19,22)/b9-5-

> <PUBCHEM_IUPAC_INCHIKEY>
NPNNKDMSXVRADT-UITAMQMPSA-N

> <PUBCHEM_XLOGP3>
2.1

> <PUBCHEM_EXACT_MASS>
313.131408

> <PUBCHEM_MOLECULAR_FORMULA>
C18H19NO4

> <PUBCHEM_MOLECULAR_WEIGHT>
313.3

> <PUBCHEM_OPENEYE_CAN_SMILES>
COC1=C(C=CC(=C1)C=CC(=O)NCCC2=CC=C(C=C2)O)O

> <PUBCHEM_OPENEYE_ISO_SMILES>
COC1=C(C=CC(=C1)/C=C\C(=O)NCCC2=CC=C(C=C2)O)O

> <PUBCHEM_CACTVS_TPSA>
78.8

> <PUBCHEM_MONOISOTOPIC_WEIGHT>
313.131408

> <PUBCHEM_TOTAL_CHARGE>
0

> <PUBCHEM_HEAVY_ATOM_COUNT>
23

> <PUBCHEM_ATOM_DEF_STEREO_COUNT>
0

> <PUBCHEM_ATOM_UDEF_STEREO_COUNT>
0

> <PUBCHEM_BOND_DEF_STEREO_COUNT>
1

> <PUBCHEM_BOND_UDEF_STEREO_COUNT>
0

> <PUBCHEM_ISOTOPIC_ATOM_COUNT>
0

> <PUBCHEM_COMPONENT_COUNT>
1

> <PUBCHEM_CACTVS_TAUTO_COUNT>
-1

> <PUBCHEM_COORDINATE_TYPE>
1
5
255

> <PUBCHEM_BONDANNOTATIONS>
10  12  8
11  15  8
12  15  8
14  18  8
14  20  8
18  19  8
19  21  8
20  22  8
21  22  8
8  10  8
8  9  8
9  11  8

$$$$
