# Supplementary material for: A Network Pharmacology-Based Study on Irritable Bowel Syndrome Prevention and Treatment Utilizing Shenling Baizhu Powder
Source: Biomed Res Int. 2021 Nov 23;2021:4579850. doi: 10.1155/2021/4579850 (PMC8632384; doi:10.1155/2021/4579850)
Supplement: Supplementary Materials — Please find detailed data in the supplementary file, including the original data of SymMap, metabolomics, and molecular docking of Shenling Baizhu powder. “Shenling Baizhu powder SymMap” includes all herbal targets and combined targets. “Shenling Baizhu powder metabolomics” includes two-dimensional structural data analysis. “Molecular docking” involves molecule-target docking and the results. [file 4579850.f1.zip › Data in brief/3. Molecular docking/Molecular-targets for docking/74.cdxml]

<?xml version="1.0" encoding="UTF-8" ?>
<!DOCTYPE CDXML SYSTEM "http://www.cambridgesoft.com/xml/cdxml.dtd" >
<CDXML
 CreationProgram="ChemDraw 19.0.0.22"
 Name="74.cdxml"
 BoundingBox="15 245.94 545.99 359.56"
 WindowPosition="0 0"
 WindowSize="0 0"
 WindowIsZoomed="yes"
 FractionalWidths="yes"
 InterpretChemically="yes"
 ShowAtomQuery="yes"
 ShowAtomStereo="no"
 ShowAtomEnhancedStereo="yes"
 ShowAtomNumber="no"
 ShowResidueID="no"
 ShowBondQuery="yes"
 ShowBondRxn="yes"
 ShowBondStereo="no"
 ShowTerminalCarbonLabels="no"
 ShowNonTerminalCarbonLabels="no"
 HideImplicitHydrogens="no"
 LabelFont="3"
 LabelSize="10"
 LabelFace="96"
 CaptionFont="4"
 CaptionSize="12"
 HashSpacing="2.70"
 MarginWidth="2"
 LineWidth="1"
 BoldWidth="4"
 BondLength="30"
 BondSpacing="12"
 ChainAngle="120"
 LabelJustification="Auto"
 CaptionJustification="Left"
 AminoAcidTermini="HOH"
 ShowSequenceTermini="yes"
 ShowSequenceBonds="yes"
 ShowSequenceUnlinkedBranches="no"
 ResidueWrapCount="40"
 ResidueBlockCount="10"
 ResidueZigZag="yes"
 NumberResidueBlocks="no"
 PrintMargins="36 36 36 36"
 MacPrintInfo="0003000002580258000000001A7B1298FF8AFF9C1AF212FD0367057B03E00002000002580258000000001A7B1298000100000064000000010001010100020001270F000100010000000000000000000000000002001901900000000000600000000000000000000100000000000000000000000000000000"
 ChemPropName=""
 ChemPropFormula="Chemical Formula: "
 ChemPropExactMass="Exact Mass: "
 ChemPropMolWt="Molecular Weight: "
 ChemPropMOverZ="m/z: "
 ChemPropAnalysis="Elemental Analysis: "
 ChemPropBoilingPt="Boiling Point: "
 ChemPropMeltingPt="Melting Point: "
 ChemPropCritTemp="Critical Temp: "
 ChemPropCritPres="Critical Pres: "
 ChemPropCritVol="Critical Vol: "
 ChemPropGibbs="Gibbs Energy: "
 ChemPropLogP="Log P: "
 ChemPropMR="MR: "
 ChemPropHenry="Henry&apos;s Law: "
 ChemPropEForm="Heat of Form: "
 ChemProptPSA="tPSA: "
 ChemPropCLogP="CLogP: "
 ChemPropCMR="CMR: "
 ChemPropLogS="LogS: "
 ChemPropPKa="pKa: "
 ChemPropID=""
 ChemPropFragmentLabel=""
 color="0"
 bgcolor="1"
 RxnAutonumberStart="1"
 RxnAutonumberConditions="no"
 RxnAutonumberStyle="Roman"
 RxnAutonumberFormat="(#)"
><colortable>
<color r="1" g="1" b="1"/>
<color r="0" g="0" b="0"/>
<color r="1" g="0" b="0"/>
<color r="1" g="1" b="0"/>
<color r="0" g="1" b="0"/>
<color r="0" g="1" b="1"/>
<color r="0" g="0" b="1"/>
<color r="1" g="0" b="1"/>
</colortable><fonttable>
<font id="3" charset="iso-8859-1" name="Arial"/>
<font id="4" charset="iso-8859-1" name="Times New Roman"/>
</fonttable><page
 id="66"
 BoundingBox="0 0 523.32 769.92"
 HeaderPosition="36"
 FooterPosition="36"
 PrintTrimMarks="yes"
 HeightPages="1"
 WidthPages="1"
><fragment
 id="64"
 BoundingBox="15 245.94 545.99 359.56"
 Z="1"
><n
 id="1"
 p="545.74 295.56"
 Z="2"
 AS="N"
/><n
 id="2"
 p="519.76 310.56"
 Z="3"
 Element="8"
 NumHydrogens="0"
 NeedsClean="yes"
 AS="N"
><t
 p="515.86 314.46"
 BoundingBox="515.86 305.94 523.66 314.56"
 LabelJustification="Left"
><s font="3" size="10" color="0" face="96">O</s></t></n><n
 id="3"
 p="493.78 295.56"
 Z="4"
 AS="N"
/><n
 id="4"
 p="467.79 310.56"
 Z="5"
 AS="N"
/><n
 id="5"
 p="441.81 295.56"
 Z="6"
 AS="N"
/><n
 id="6"
 p="415.83 310.56"
 Z="7"
 AS="N"
/><n
 id="7"
 p="389.85 295.56"
 Z="8"
 AS="N"
/><n
 id="8"
 p="363.87 310.56"
 Z="9"
 AS="N"
/><n
 id="9"
 p="337.89 295.56"
 Z="10"
 Element="7"
 NumHydrogens="1"
 NeedsClean="yes"
 AS="N"
><t
 p="334.29 291.12"
 BoundingBox="334.29 282.77 341.51 299.46"
 LabelJustification="Left"
 LabelAlignment="Above"
 LineStarts="2 4"
><s font="3" size="10" color="0" face="96">NH</s></t></n><n
 id="10"
 p="311.91 310.56"
 Z="11"
 AS="N"
/><n
 id="11"
 p="285.93 295.56"
 Z="12"
 AS="N"
/><n
 id="12"
 p="259.95 310.56"
 Z="13"
 AS="N"
/><n
 id="13"
 p="233.97 295.56"
 Z="14"
 AS="N"
/><n
 id="14"
 p="207.99 310.56"
 Z="15"
 Element="7"
 NumHydrogens="1"
 NeedsClean="yes"
 AS="N"
><t
 p="204.39 314.46"
 BoundingBox="204.39 306.12 211.61 322.80"
 LabelJustification="Left"
 LabelAlignment="Below"
 LineStarts="2 3"
><s font="3" size="10" color="0" face="96">NH</s></t></n><n
 id="15"
 p="182.01 295.56"
 Z="16"
 AS="N"
/><n
 id="16"
 p="156.03 310.56"
 Z="17"
 AS="N"
/><n
 id="17"
 p="130.04 295.56"
 Z="18"
 AS="N"
/><n
 id="18"
 p="104.06 310.56"
 Z="19"
 AS="N"
/><n
 id="19"
 p="104.06 340.56"
 Z="20"
 AS="N"
/><n
 id="20"
 p="78.08 355.56"
 Z="21"
 AS="N"
/><n
 id="21"
 p="52.10 340.56"
 Z="22"
 AS="N"
/><n
 id="22"
 p="26.12 355.56"
 Z="23"
 Element="8"
 NumHydrogens="1"
 NeedsClean="yes"
 AS="N"
><t
 p="30.02 359.46"
 BoundingBox="15 350.94 30.02 359.56"
 LabelJustification="Right"
 Justification="Right"
 LabelAlignment="Right"
><s font="3" size="10" color="0" face="96">OH</s></t></n><n
 id="23"
 p="52.10 310.56"
 Z="24"
 AS="N"
/><n
 id="24"
 p="78.08 295.56"
 Z="25"
 AS="N"
/><n
 id="25"
 p="182.01 265.56"
 Z="26"
 Element="8"
 NumHydrogens="0"
 NeedsClean="yes"
 AS="N"
><t
 p="178.11 269.46"
 BoundingBox="178.11 260.94 185.91 269.56"
 LabelJustification="Left"
><s font="3" size="10" color="0" face="96">O</s></t></n><n
 id="26"
 p="363.87 340.56"
 Z="27"
 Element="8"
 NumHydrogens="0"
 NeedsClean="yes"
 AS="N"
><t
 p="359.97 344.46"
 BoundingBox="359.97 335.94 367.77 344.56"
 LabelJustification="Left"
><s font="3" size="10" color="0" face="96">O</s></t></n><n
 id="27"
 p="441.81 265.56"
 Z="28"
 AS="N"
/><n
 id="28"
 p="467.79 250.56"
 Z="29"
 AS="N"
/><n
 id="29"
 p="493.78 265.56"
 Z="30"
 AS="N"
/><n
 id="30"
 p="519.76 250.56"
 Z="31"
 Element="8"
 NumHydrogens="1"
 NeedsClean="yes"
 AS="N"
><t
 p="515.86 254.46"
 BoundingBox="515.86 245.94 523.66 262.90"
 LabelJustification="Left"
 LabelAlignment="Left"
 LineStarts="1 2"
><s font="3" size="10" color="0" face="96">OH</s></t></n><b
 id="32"
 Z="32"
 B="1"
 E="2"
 BS="N"
/><b
 id="33"
 Z="33"
 B="2"
 E="3"
 BS="N"
/><b
 id="34"
 Z="34"
 B="3"
 E="4"
 Order="2"
 BS="N"
 BondCircularOrdering="33 61 35 0"
/><b
 id="35"
 Z="35"
 B="4"
 E="5"
 BS="N"
/><b
 id="36"
 Z="36"
 B="5"
 E="6"
 BS="N"
/><b
 id="37"
 Z="37"
 B="6"
 E="7"
 Order="2"
 Display="Wavy"
 BS="N"
 BondCircularOrdering="0 36 0 38"
/><b
 id="38"
 Z="38"
 B="7"
 E="8"
 BS="N"
/><b
 id="39"
 Z="39"
 B="8"
 E="9"
 BS="N"
/><b
 id="40"
 Z="40"
 B="9"
 E="10"
 BS="N"
/><b
 id="41"
 Z="41"
 B="10"
 E="11"
 BS="N"
/><b
 id="42"
 Z="42"
 B="11"
 E="12"
 BS="N"
/><b
 id="43"
 Z="43"
 B="12"
 E="13"
 BS="N"
/><b
 id="44"
 Z="44"
 B="13"
 E="14"
 BS="N"
/><b
 id="45"
 Z="45"
 B="14"
 E="15"
 BS="N"
/><b
 id="46"
 Z="46"
 B="15"
 E="16"
 BS="N"
/><b
 id="47"
 Z="47"
 B="16"
 E="17"
 Order="2"
 Display="Wavy"
 BS="N"
 BondCircularOrdering="0 46 0 48"
/><b
 id="48"
 Z="48"
 B="17"
 E="18"
 BS="N"
/><b
 id="49"
 Z="49"
 B="18"
 E="19"
 Order="2"
 BS="N"
 BondCircularOrdering="48 55 50 0"
/><b
 id="50"
 Z="50"
 B="19"
 E="20"
 BS="N"
/><b
 id="51"
 Z="51"
 B="20"
 E="21"
 Order="2"
 BS="N"
 BondCircularOrdering="0 50 53 52"
/><b
 id="52"
 Z="52"
 B="21"
 E="22"
 BS="N"
/><b
 id="53"
 Z="53"
 B="21"
 E="23"
 BS="N"
/><b
 id="54"
 Z="54"
 B="23"
 E="24"
 Order="2"
 BS="N"
 BondCircularOrdering="0 53 55 0"
/><b
 id="55"
 Z="55"
 B="18"
 E="24"
 BS="N"
/><b
 id="56"
 Z="56"
 B="15"
 E="25"
 Order="2"
 BS="N"
/><b
 id="57"
 Z="57"
 B="8"
 E="26"
 Order="2"
 BS="N"
/><b
 id="58"
 Z="58"
 B="5"
 E="27"
 Order="2"
 BS="N"
 BondCircularOrdering="36 35 59 0"
/><b
 id="59"
 Z="59"
 B="27"
 E="28"
 BS="N"
/><b
 id="60"
 Z="60"
 B="28"
 E="29"
 Order="2"
 BS="N"
 BondCircularOrdering="0 59 61 62"
/><b
 id="61"
 Z="61"
 B="3"
 E="29"
 BS="N"
/><b
 id="62"
 Z="62"
 B="29"
 E="30"
 BS="N"
/></fragment></page></CDXML>
