# Supplementary material for: A Network Pharmacology-Based Study on Irritable Bowel Syndrome Prevention and Treatment Utilizing Shenling Baizhu Powder
Source: Biomed Res Int. 2021 Nov 23;2021:4579850. doi: 10.1155/2021/4579850 (PMC8632384; doi:10.1155/2021/4579850)
Supplement: Supplementary Materials — Please find detailed data in the supplementary file, including the original data of SymMap, metabolomics, and molecular docking of Shenling Baizhu powder. “Shenling Baizhu powder SymMap” includes all herbal targets and combined targets. “Shenling Baizhu powder metabolomics” includes two-dimensional structural data analysis. “Molecular docking” involves molecule-target docking and the results. [file 4579850.f1.zip › Data in brief/3. Molecular docking/Results of molecular docking/22-2.pdb]

REMARK   4 XXXX COMPLIES WITH FORMAT V. 2.0
ATOM      1  C   *** d   *      17.454  53.745  37.400  0.00  0.00      1tnf C  
ATOM      2  C   *** d   *      16.382  54.142  36.368  0.00  0.00      1tnf C  
ATOM      3  C   *** d   *      17.012  52.355  37.789  0.00  0.00      1tnf C  
ATOM      4  C   *** d   *      15.202  53.179  36.516  0.00  0.00      1tnf C  
ATOM      5  C   *** d   *      15.822  52.033  37.263  0.00  0.00      1tnf C  
ATOM      6  C   *** d   *      18.858  53.875  36.781  0.00  0.00      1tnf C  
ATOM      7  C   *** d   *      19.225  52.822  35.741  0.00  0.00      1tnf C  
ATOM      8  O   *** d   *      20.631  52.668  35.706  0.00  0.00      1tnf O  
ATOM      9  H   *** d   *      20.916  52.573  34.794  0.00  0.00      1tnf H  
ATOM     10  O   *** d   *      15.972  55.473  36.555  0.00  0.00      1tnf O  
ATOM     11  H   *** d   *      16.710  55.986  36.893  0.00  0.00      1tnf H  
ATOM     12  C   *** d   *      17.772  51.498  38.756  0.00  0.00      1tnf C  
ATOM     13  O   *** d   *      18.006  52.237  39.945  0.00  0.00      1tnf O  
ATOM     14  H   *** d   *      18.793  52.766  39.781  0.00  0.00      1tnf H  
ATOM     15  C   *** d   *      15.062  50.754  37.470  0.00  0.00      1tnf C  
ATOM     16  O   *** d   *      15.365  49.798  36.462  0.00  0.00      1tnf O  
ATOM     17  H   *** d   *      14.672  49.796  35.801  0.00  0.00      1tnf H  
TER      18      *** d   * 
