# Supplementary material for: A Network Pharmacology-Based Study on Irritable Bowel Syndrome Prevention and Treatment Utilizing Shenling Baizhu Powder
Source: Biomed Res Int. 2021 Nov 23;2021:4579850. doi: 10.1155/2021/4579850 (PMC8632384; doi:10.1155/2021/4579850)
Supplement: Supplementary Materials — Please find detailed data in the supplementary file, including the original data of SymMap, metabolomics, and molecular docking of Shenling Baizhu powder. “Shenling Baizhu powder SymMap” includes all herbal targets and combined targets. “Shenling Baizhu powder metabolomics” includes two-dimensional structural data analysis. “Molecular docking” involves molecule-target docking and the results. [file 4579850.f1.zip › Data in brief/3. Molecular docking/Results of molecular docking/42-2.pdb]

REMARK   4 XXXX COMPLIES WITH FORMAT V. 2.0
ATOM      1  O   *** d   *      10.291  60.116  30.659  0.00  0.00      1tnf O  
ATOM      2  O   *** d   *       8.121  62.766  32.656  0.00  0.00      1tnf O  
ATOM      3  C   *** d   *       8.752  61.964  30.618  0.00  0.00      1tnf C  
ATOM      4  C   *** d   *       9.656  61.177  32.669  0.00  0.00      1tnf C  
ATOM      5  C   *** d   *       8.035  62.840  29.849  0.00  0.00      1tnf C  
ATOM      6  C   *** d   *       8.815  62.022  31.991  0.00  0.00      1tnf C  
ATOM      7  C   *** d   *      10.380  60.260  32.004  0.00  0.00      1tnf C  
ATOM      8  C   *** d   *       9.507  61.018  30.018  0.00  0.00      1tnf C  
ATOM      9  C   *** d   *       7.765  62.606  28.543  0.00  0.00      1tnf C  
ATOM     10  C   *** d   *       7.538  64.028  30.257  0.00  0.00      1tnf C  
ATOM     11  C   *** d   *       9.783  61.234  34.011  0.00  0.00      1tnf C  
ATOM     12  C   *** d   *      11.201  59.445  32.692  0.00  0.00      1tnf C  
ATOM     13  C   *** d   *       7.069  63.418  27.727  0.00  0.00      1tnf C  
ATOM     14  C   *** d   *       6.575  64.584  28.184  0.00  0.00      1tnf C  
ATOM     15  C   *** d   *       6.841  64.863  29.470  0.00  0.00      1tnf C  
ATOM     16  C   *** d   *      11.343  59.498  34.024  0.00  0.00      1tnf C  
ATOM     17  C   *** d   *      10.609  60.413  34.675  0.00  0.00      1tnf C  
ATOM     18  O   *** d   *       6.843  63.067  26.430  0.00  0.00      1tnf O  
ATOM     19  H   *** d   *       7.014  63.833  25.859  0.00  0.00      1tnf H  
ATOM     20  O   *** d   *       5.875  65.386  27.315  0.00  0.00      1tnf O  
ATOM     21  C   *** d   *       4.665  65.964  27.746  0.00  0.00      1tnf C  
ATOM     22  O   *** d   *      12.185  58.654  34.680  0.00  0.00      1tnf O  
ATOM     23  H   *** d   *      12.574  58.034  34.041  0.00  0.00      1tnf H  
TER      24      *** d   * 
