# Supplementary material for: A Network Pharmacology-Based Study on Irritable Bowel Syndrome Prevention and Treatment Utilizing Shenling Baizhu Powder
Source: Biomed Res Int. 2021 Nov 23;2021:4579850. doi: 10.1155/2021/4579850 (PMC8632384; doi:10.1155/2021/4579850)
Supplement: Supplementary Materials — Please find detailed data in the supplementary file, including the original data of SymMap, metabolomics, and molecular docking of Shenling Baizhu powder. “Shenling Baizhu powder SymMap” includes all herbal targets and combined targets. “Shenling Baizhu powder metabolomics” includes two-dimensional structural data analysis. “Molecular docking” involves molecule-target docking and the results. [file 4579850.f1.zip › Data in brief/3. Molecular docking/Results of molecular docking/49-2.pdb]

REMARK   4 XXXX COMPLIES WITH FORMAT V. 2.0
ATOM      1  O   *** d   *       7.964  64.854  34.095  0.00  0.00      1tnf O  
ATOM      2  N   *** d   *       9.701  63.601  34.488  0.00  0.00      1tnf N  
ATOM      3  C   *** d   *       8.977  64.389  33.636  0.00  0.00      1tnf C  
ATOM      4  H   *** d   *       9.270  63.468  35.402  0.00  0.00      1tnf H  
ATOM      5  C   *** d   *       9.434  64.634  32.378  0.00  0.00      1tnf C  
ATOM      6  C   *** d   *       8.782  64.656  31.196  0.00  0.00      1tnf C  
ATOM      7  C   *** d   *       7.554  64.282  30.775  0.00  0.00      1tnf C  
ATOM      8  C   *** d   *       6.982  64.957  29.754  0.00  0.00      1tnf C  
ATOM      9  C   *** d   *       5.772  64.672  29.228  0.00  0.00      1tnf C  
ATOM     10  C   *** d   *       5.100  63.624  29.749  0.00  0.00      1tnf C  
ATOM     11  C   *** d   *       5.666  62.906  30.731  0.00  0.00      1tnf C  
ATOM     12  C   *** d   *       6.871  63.217  31.225  0.00  0.00      1tnf C  
ATOM     13  O   *** d   *       5.172  65.368  28.203  0.00  0.00      1tnf O  
ATOM     14  C   *** d   *       5.845  65.503  26.972  0.00  0.00      1tnf C  
ATOM     15  O   *** d   *       3.877  63.268  29.270  0.00  0.00      1tnf O  
ATOM     16  H   *** d   *       3.304  64.051  29.258  0.00  0.00      1tnf H  
ATOM     17  C   *** d   *      10.939  62.878  34.174  0.00  0.00      1tnf C  
ATOM     18  C   *** d   *      10.725  61.358  34.223  0.00  0.00      1tnf C  
ATOM     19  C   *** d   *       9.982  60.883  32.991  0.00  0.00      1tnf C  
ATOM     20  C   *** d   *       8.835  60.192  33.106  0.00  0.00      1tnf C  
ATOM     21  C   *** d   *       8.173  59.772  32.017  0.00  0.00      1tnf C  
ATOM     22  C   *** d   *       8.631  60.027  30.779  0.00  0.00      1tnf C  
ATOM     23  C   *** d   *       9.778  60.719  30.670  0.00  0.00      1tnf C  
ATOM     24  C   *** d   *      10.444  61.142  31.756  0.00  0.00      1tnf C  
ATOM     25  O   *** d   *       7.963  59.603  29.673  0.00  0.00      1tnf O  
ATOM     26  H   *** d   *       8.055  60.267  28.971  0.00  0.00      1tnf H  
TER      27      *** d   * 
