# Supplementary material for: A Network Pharmacology-Based Study on Irritable Bowel Syndrome Prevention and Treatment Utilizing Shenling Baizhu Powder
Source: Biomed Res Int. 2021 Nov 23;2021:4579850. doi: 10.1155/2021/4579850 (PMC8632384; doi:10.1155/2021/4579850)
Supplement: Supplementary Materials — Please find detailed data in the supplementary file, including the original data of SymMap, metabolomics, and molecular docking of Shenling Baizhu powder. “Shenling Baizhu powder SymMap” includes all herbal targets and combined targets. “Shenling Baizhu powder metabolomics” includes two-dimensional structural data analysis. “Molecular docking” involves molecule-target docking and the results. [file 4579850.f1.zip › Data in brief/3. Molecular docking/Results of molecular docking/74-2.pdb]

REMARK   4 XXXX COMPLIES WITH FORMAT V. 2.0
ATOM      1  C   *** d   *       4.582  65.950  28.866  0.00  0.00      1tnf C  
ATOM      2  N   *** d   *       5.306  65.216  29.907  0.00  0.00      1tnf N  
ATOM      3  C   *** d   *       4.919  63.979  30.342  0.00  0.00      1tnf C  
ATOM      4  O   *** d   *       3.949  63.420  29.888  0.00  0.00      1tnf O  
ATOM      5  H   *** d   *       6.145  65.632  30.313  0.00  0.00      1tnf H  
ATOM      6  C   *** d   *       5.741  63.495  31.313  0.00  0.00      1tnf C  
ATOM      7  C   *** d   *       7.004  63.922  31.499  0.00  0.00      1tnf C  
ATOM      8  C   *** d   *       7.886  63.497  32.429  0.00  0.00      1tnf C  
ATOM      9  C   *** d   *       8.440  64.396  33.269  0.00  0.00      1tnf C  
ATOM     10  C   *** d   *       9.311  64.071  34.243  0.00  0.00      1tnf C  
ATOM     11  C   *** d   *       9.714  62.788  34.337  0.00  0.00      1tnf C  
ATOM     12  C   *** d   *       9.177  61.877  33.513  0.00  0.00      1tnf C  
ATOM     13  C   *** d   *       8.273  62.216  32.583  0.00  0.00      1tnf C  
ATOM     14  O   *** d   *       9.879  65.024  35.050  0.00  0.00      1tnf O  
ATOM     15  C   *** d   *      10.447  66.107  34.348  0.00  0.00      1tnf C  
ATOM     16  O   *** d   *      10.642  62.437  35.269  0.00  0.00      1tnf O  
ATOM     17  H   *** d   *      10.180  62.028  36.019  0.00  0.00      1tnf H  
ATOM     18  C   *** d   *       5.465  67.084  28.325  0.00  0.00      1tnf C  
ATOM     19  C   *** d   *       6.125  66.716  26.986  0.00  0.00      1tnf C  
ATOM     20  C   *** d   *       6.163  65.197  26.769  0.00  0.00      1tnf C  
ATOM     21  N   *** d   *       7.292  64.614  27.500  0.00  0.00      1tnf N  
ATOM     22  C   *** d   *       7.340  63.289  27.839  0.00  0.00      1tnf C  
ATOM     23  O   *** d   *       6.454  62.525  27.538  0.00  0.00      1tnf O  
ATOM     24  H   *** d   *       8.062  65.217  27.789  0.00  0.00      1tnf H  
ATOM     25  C   *** d   *       8.468  62.971  28.530  0.00  0.00      1tnf C  
ATOM     26  C   *** d   *       8.722  61.738  29.008  0.00  0.00      1tnf C  
ATOM     27  C   *** d   *       9.807  61.332  29.704  0.00  0.00      1tnf C  
ATOM     28  C   *** d   *      10.878  62.149  29.780  0.00  0.00      1tnf C  
ATOM     29  C   *** d   *      11.986  61.804  30.454  0.00  0.00      1tnf C  
ATOM     30  C   *** d   *      12.079  60.624  31.087  0.00  0.00      1tnf C  
ATOM     31  C   *** d   *      11.016  59.807  31.017  0.00  0.00      1tnf C  
ATOM     32  C   *** d   *       9.908  60.150  30.342  0.00  0.00      1tnf C  
ATOM     33  O   *** d   *      13.198  60.266  31.773  0.00  0.00      1tnf O  
ATOM     34  H   *** d   *      12.937  59.899  32.633  0.00  0.00      1tnf H  
TER      35      *** d   * 
