# Supplementary material for: A Network Pharmacology-Based Study on Irritable Bowel Syndrome Prevention and Treatment Utilizing Shenling Baizhu Powder
Source: Biomed Res Int. 2021 Nov 23;2021:4579850. doi: 10.1155/2021/4579850 (PMC8632384; doi:10.1155/2021/4579850)
Supplement: Supplementary Materials — Please find detailed data in the supplementary file, including the original data of SymMap, metabolomics, and molecular docking of Shenling Baizhu powder. “Shenling Baizhu powder SymMap” includes all herbal targets and combined targets. “Shenling Baizhu powder metabolomics” includes two-dimensional structural data analysis. “Molecular docking” involves molecule-target docking and the results. [file 4579850.f1.zip › Data in brief/3. Molecular docking/Results of molecular docking/75-2.pdb]

REMARK   4 XXXX COMPLIES WITH FORMAT V. 2.0
ATOM      1  C   *** d   *       4.801  64.869  27.553  0.00  0.00      1tnf C  
ATOM      2  C   *** d   *       4.496  65.547  28.899  0.00  0.00      1tnf C  
ATOM      3  C   *** d   *       4.168  64.523  29.997  0.00  0.00      1tnf C  
ATOM      4  N   *** d   *       5.332  64.345  30.868  0.00  0.00      1tnf N  
ATOM      5  C   *** d   *       5.938  63.134  31.045  0.00  0.00      1tnf C  
ATOM      6  O   *** d   *       5.535  62.143  30.479  0.00  0.00      1tnf O  
ATOM      7  H   *** d   *       5.709  65.157  31.353  0.00  0.00      1tnf H  
ATOM      8  C   *** d   *       7.010  63.101  31.883  0.00  0.00      1tnf C  
ATOM      9  C   *** d   *       7.848  64.124  32.138  0.00  0.00      1tnf C  
ATOM     10  C   *** d   *       8.916  64.121  32.965  0.00  0.00      1tnf C  
ATOM     11  C   *** d   *       9.404  62.940  33.398  0.00  0.00      1tnf C  
ATOM     12  C   *** d   *      10.462  62.868  34.221  0.00  0.00      1tnf C  
ATOM     13  C   *** d   *      11.087  63.975  34.653  0.00  0.00      1tnf C  
ATOM     14  C   *** d   *      10.607  65.153  34.227  0.00  0.00      1tnf C  
ATOM     15  C   *** d   *       9.548  65.227  33.403  0.00  0.00      1tnf C  
ATOM     16  O   *** d   *      12.160  63.912  35.486  0.00  0.00      1tnf O  
ATOM     17  H   *** d   *      12.832  63.331  35.096  0.00  0.00      1tnf H  
ATOM     18  C   *** d   *       6.189  65.251  27.020  0.00  0.00      1tnf C  
ATOM     19  N   *** d   *       7.226  64.660  27.872  0.00  0.00      1tnf N  
ATOM     20  C   *** d   *       7.636  63.364  27.736  0.00  0.00      1tnf C  
ATOM     21  O   *** d   *       7.165  62.642  26.888  0.00  0.00      1tnf O  
ATOM     22  H   *** d   *       7.631  65.228  28.612  0.00  0.00      1tnf H  
ATOM     23  C   *** d   *       8.594  62.932  28.602  0.00  0.00      1tnf C  
ATOM     24  C   *** d   *       8.707  61.688  29.102  0.00  0.00      1tnf C  
ATOM     25  C   *** d   *       9.649  61.234  29.959  0.00  0.00      1tnf C  
ATOM     26  C   *** d   *       9.404  60.130  30.691  0.00  0.00      1tnf C  
ATOM     27  C   *** d   *      10.256  59.576  31.579  0.00  0.00      1tnf C  
ATOM     28  C   *** d   *      11.455  60.183  31.740  0.00  0.00      1tnf C  
ATOM     29  C   *** d   *      11.719  61.286  31.021  0.00  0.00      1tnf C  
ATOM     30  C   *** d   *      10.848  61.810  30.149  0.00  0.00      1tnf C  
ATOM     31  O   *** d   *       9.813  58.441  32.224  0.00  0.00      1tnf O  
ATOM     32  C   *** d   *      10.190  57.160  31.782  0.00  0.00      1tnf C  
ATOM     33  O   *** d   *      12.417  59.742  32.595  0.00  0.00      1tnf O  
ATOM     34  H   *** d   *      12.684  58.841  32.352  0.00  0.00      1tnf H  
TER      35      *** d   * 
