# Supplementary material for: A Network Pharmacology-Based Study on Irritable Bowel Syndrome Prevention and Treatment Utilizing Shenling Baizhu Powder
Source: Biomed Res Int. 2021 Nov 23;2021:4579850. doi: 10.1155/2021/4579850 (PMC8632384; doi:10.1155/2021/4579850)
Supplement: Supplementary Materials — Please find detailed data in the supplementary file, including the original data of SymMap, metabolomics, and molecular docking of Shenling Baizhu powder. “Shenling Baizhu powder SymMap” includes all herbal targets and combined targets. “Shenling Baizhu powder metabolomics” includes two-dimensional structural data analysis. “Molecular docking” involves molecule-target docking and the results. [file 4579850.f1.zip › Data in brief/3. Molecular docking/Results of molecular docking/75-3.pdb]

ATOM      1  N   ARG A   6      29.842  48.919  61.586  1.00 39.68      1tnf N  
ATOM      2  CA  ARG A   6      31.034  48.617  62.363  1.00 41.52      1tnf C  
ATOM      3  C   ARG A   6      31.777  47.668  61.426  1.00 40.88      1tnf C  
ATOM      4  O   ARG A   6      31.635  47.872  60.214  1.00 39.93      1tnf O  
ATOM      5  CB  ARG A   6      30.699  47.888  63.665  1.00 40.94      1tnf C  
ATOM      6  HN1 ARG A   6      30.065  49.405  60.718  1.00  0.00      1tnf H  
ATOM      7  HN2 ARG A   6      29.162  49.442  62.139  1.00  0.00      1tnf H  
ATOM      8  HN3 ARG A   6      29.293  48.078  61.409  1.00  0.00      1tnf H  
ATOM      9  N   THR A   7      32.515  46.661  61.862  1.00 38.88      1tnf N  
ATOM     10  CA  THR A   7      33.238  45.820  60.939  1.00 37.32      1tnf C  
ATOM     11  C   THR A   7      32.639  44.461  61.249  1.00 35.81      1tnf C  
ATOM     12  O   THR A   7      32.844  43.996  62.368  1.00 38.75      1tnf O  
ATOM     13  CB  THR A   7      34.737  45.950  61.317  1.00 38.85      1tnf C  
ATOM     14  CG2 THR A   7      35.673  45.269  60.320  1.00 38.78      1tnf C  
ATOM     15  OG1 THR A   7      35.001  47.356  61.436  1.00 37.13      1tnf O  
ATOM     16  HN  THR A   7      32.574  46.476  62.863  1.00  0.00      1tnf H  
ATOM     17  HG1 THR A   7      35.919  47.436  61.667  1.00  0.00      1tnf H  
ATOM     18  N   PRO A   8      31.831  43.760  60.486  1.00 33.97      1tnf N  
ATOM     19  CA  PRO A   8      32.242  42.447  59.976  1.00 32.94      1tnf C  
ATOM     20  C   PRO A   8      33.203  42.383  58.808  1.00 32.17      1tnf C  
ATOM     21  O   PRO A   8      33.427  43.309  58.045  1.00 30.87      1tnf O  
ATOM     22  CB  PRO A   8      30.965  41.696  59.644  1.00 31.60      1tnf C  
ATOM     23  CG  PRO A   8      29.963  42.810  59.619  1.00 33.61      1tnf C  
ATOM     24  CD  PRO A   8      30.407  43.716  60.737  1.00 31.93      1tnf C  
ATOM     25  N   SER A   9      33.724  41.170  58.786  1.00 35.97      1tnf N  
ATOM     26  CA  SER A   9      34.629  40.613  57.806  1.00 38.87      1tnf C  
ATOM     27  C   SER A   9      35.975  41.307  57.557  1.00 40.16      1tnf C  
ATOM     28  O   SER A   9      36.183  42.491  57.855  1.00 40.43      1tnf O  
ATOM     29  CB  SER A   9      33.763  40.490  56.548  1.00 39.21      1tnf C  
ATOM     30  OG  SER A   9      32.557  39.807  56.872  1.00 43.46      1tnf O  
ATOM     31  HN  SER A   9      33.456  40.552  59.552  1.00  0.00      1tnf H  
ATOM     32  HG  SER A   9      32.020  39.731  56.092  1.00  0.00      1tnf H  
ATOM     33  N   ASP A  10      36.973  40.551  57.075  1.00 41.38      1tnf N  
ATOM     34  CA  ASP A  10      38.221  41.169  56.676  1.00 42.83      1tnf C  
ATOM     35  C   ASP A  10      38.068  41.514  55.187  1.00 40.20      1tnf C  
ATOM     36  O   ASP A  10      38.846  41.130  54.320  1.00 41.24      1tnf O  
ATOM     37  CB  ASP A  10      39.394  40.192  56.895  1.00 47.82      1tnf C  
ATOM     38  CG  ASP A  10      40.825  40.799  56.893  1.00 50.02      1tnf C  
ATOM     39  OD1 ASP A  10      41.790  40.011  56.996  1.00 51.28      1tnf O  
ATOM     40  OD2 ASP A  10      40.986  42.031  56.856  1.00 49.89      1tnf O1-
ATOM     41  HN  ASP A  10      36.853  39.542  56.990  1.00  0.00      1tnf H  
ATOM     42  N   LYS A  11      37.045  42.270  54.837  1.00 36.66      1tnf N  
ATOM     43  CA  LYS A  11      36.819  42.605  53.450  1.00 33.31      1tnf C  
ATOM     44  C   LYS A  11      37.190  44.064  53.420  1.00 29.72      1tnf C  
ATOM     45  O   LYS A  11      36.903  44.729  54.406  1.00 31.69      1tnf O  
ATOM     46  CB  LYS A  11      35.348  42.466  53.056  1.00 32.40      1tnf C  
ATOM     47  CG  LYS A  11      34.705  41.181  53.484  1.00 31.67      1tnf C  
ATOM     48  CD  LYS A  11      35.441  39.921  53.091  1.00 33.63      1tnf C  
ATOM     49  CE  LYS A  11      34.910  39.417  51.762  1.00 36.45      1tnf C  
ATOM     50  NZ  LYS A  11      35.333  38.042  51.556  1.00 39.05      1tnf N1+
ATOM     51  HN  LYS A  11      36.408  42.621  55.552  1.00  0.00      1tnf H  
ATOM     52  HZ1 LYS A  11      34.976  37.703  50.663  1.00  0.00      1tnf H  
ATOM     53  HZ2 LYS A  11      35.064  37.437  52.332  1.00  0.00      1tnf H  
ATOM     54  HZ3 LYS A  11      36.345  37.936  51.631  1.00  0.00      1tnf H  
ATOM     55  N   PRO A  12      37.815  44.675  52.420  1.00 26.99      1tnf N  
ATOM     56  CA  PRO A  12      37.670  46.106  52.186  1.00 25.68      1tnf C  
ATOM     57  C   PRO A  12      36.211  46.432  51.808  1.00 24.03      1tnf C  
ATOM     58  O   PRO A  12      35.604  45.729  50.988  1.00 28.09      1tnf O  
ATOM     59  CB  PRO A  12      38.721  46.369  51.085  1.00 26.10      1tnf C  
ATOM     60  CG  PRO A  12      39.744  45.260  51.206  1.00 22.94      1tnf C  
ATOM     61  CD  PRO A  12      38.820  44.081  51.540  1.00 27.22      1tnf C  
ATOM     62  N   VAL A  13      35.608  47.418  52.454  1.00 21.61      1tnf N  
ATOM     63  CA  VAL A  13      34.317  47.986  52.094  1.00 19.50      1tnf C  
ATOM     64  C   VAL A  13      34.551  49.465  52.182  1.00 18.39      1tnf C  
ATOM     65  O   VAL A  13      35.603  49.853  52.699  1.00 19.54      1tnf O  
ATOM     66  CB  VAL A  13      33.097  47.799  53.037  1.00 20.38      1tnf C  
ATOM     67  CG1 VAL A  13      32.385  46.553  52.627  1.00 21.65      1tnf C  
ATOM     68  CG2 VAL A  13      33.485  47.662  54.476  1.00 20.14      1tnf C  
ATOM     69  HN  VAL A  13      36.085  47.810  53.266  1.00  0.00      1tnf H  
ATOM     70  N   ALA A  14      33.562  50.234  51.717  1.00 17.40      1tnf N  
ATOM     71  CA  ALA A  14      33.465  51.686  51.784  1.00 17.15      1tnf C  
ATOM     72  C   ALA A  14      32.011  52.060  51.464  1.00 16.29      1tnf C  
ATOM     73  O   ALA A  14      31.342  51.341  50.711  1.00 22.23      1tnf O  
ATOM     74  CB  ALA A  14      34.347  52.384  50.744  1.00 12.97      1tnf C  
ATOM     75  HN  ALA A  14      32.787  49.749  51.264  1.00  0.00      1tnf H  
ATOM     76  N   HIS A  15      31.390  53.058  52.063  1.00 15.14      1tnf N  
ATOM     77  CA  HIS A  15      30.091  53.564  51.611  1.00 15.01      1tnf C  
ATOM     78  C   HIS A  15      30.183  55.008  52.047  1.00 15.15      1tnf C  
ATOM     79  O   HIS A  15      29.982  55.260  53.226  1.00 13.55      1tnf O  
ATOM     80  CB  HIS A  15      28.908  52.900  52.306  1.00 13.52      1tnf C  
ATOM     81  CG  HIS A  15      27.530  53.393  51.817  1.00 14.47      1tnf C  
ATOM     82  CD2 HIS A  15      27.070  54.692  51.787  1.00 11.73      1tnf C  
ATOM     83  ND1 HIS A  15      26.521  52.618  51.405  1.00 16.61      1tnf N  
ATOM     84  CE1 HIS A  15      25.500  53.371  51.139  1.00 15.26      1tnf C  
ATOM     85  NE2 HIS A  15      25.844  54.616  51.376  1.00 15.57      1tnf N  
ATOM     86  HN  HIS A  15      31.831  53.495  52.872  1.00  0.00      1tnf H  
ATOM     87  HD1 HIS A  15      26.550  51.602  51.315  1.00  0.00      1tnf H  
ATOM     88  HE2 HIS A  15      25.226  55.418  51.253  1.00  0.00      1tnf H  
ATOM     89  N   VAL A  16      30.565  55.883  51.126  1.00 14.92      1tnf N  
ATOM     90  CA  VAL A  16      30.718  57.314  51.377  1.00 18.41      1tnf C  
ATOM     91  C   VAL A  16      29.544  58.085  50.806  1.00 15.74      1tnf C  
ATOM     92  O   VAL A  16      28.855  57.534  49.934  1.00 17.64      1tnf O  
ATOM     93  CB  VAL A  16      32.065  57.854  50.763  1.00 21.61      1tnf C  
ATOM     94  CG1 VAL A  16      33.180  56.932  51.211  1.00 22.94      1tnf C  
ATOM     95  CG2 VAL A  16      32.058  57.898  49.242  1.00 25.48      1tnf C  
ATOM     96  HN  VAL A  16      30.764  55.536  50.188  1.00  0.00      1tnf H  
ATOM     97  N   VAL A  17      29.300  59.302  51.283  1.00 12.85      1tnf N  
ATOM     98  CA  VAL A  17      28.147  60.136  50.898  1.00 16.77      1tnf C  
ATOM     99  C   VAL A  17      28.491  61.561  50.493  1.00 19.54      1tnf C  
ATOM    100  O   VAL A  17      29.534  62.099  50.856  1.00 21.62      1tnf O  
ATOM    101  CB  VAL A  17      27.079  60.326  52.005  1.00 16.12      1tnf C  
ATOM    102  CG1 VAL A  17      25.948  59.331  51.760  1.00 15.95      1tnf C  
ATOM    103  CG2 VAL A  17      27.716  60.222  53.387  1.00 15.00      1tnf C  
ATOM    104  HN  VAL A  17      29.957  59.685  51.963  1.00  0.00      1tnf H  
ATOM    105  N   ALA A  18      27.582  62.192  49.758  1.00 19.08      1tnf N  
ATOM    106  CA  ALA A  18      27.783  63.518  49.242  1.00 19.98      1tnf C  
ATOM    107  C   ALA A  18      27.703  64.557  50.338  1.00 24.70      1tnf C  
ATOM    108  O   ALA A  18      26.717  64.629  51.069  1.00 27.66      1tnf O  
ATOM    109  CB  ALA A  18      26.733  63.834  48.240  1.00 14.88      1tnf C  
ATOM    110  HN  ALA A  18      26.704  61.715  49.551  1.00  0.00      1tnf H  
ATOM    111  N   ASN A  19      28.736  65.369  50.511  1.00 26.98      1tnf N  
ATOM    112  CA  ASN A  19      28.697  66.444  51.475  1.00 29.56      1tnf C  
ATOM    113  C   ASN A  19      27.568  67.410  51.167  1.00 31.18      1tnf C  
ATOM    114  O   ASN A  19      27.675  68.119  50.166  1.00 34.17      1tnf O  
ATOM    115  CB  ASN A  19      29.968  67.225  51.440  1.00 31.69      1tnf C  
ATOM    116  CG  ASN A  19      30.223  67.991  52.713  1.00 30.14      1tnf C  
ATOM    117  ND2 ASN A  19      29.272  68.607  53.378  1.00 31.91      1tnf N  
ATOM    118  OD1 ASN A  19      31.337  67.987  53.217  1.00 31.47      1tnf O  
ATOM    119  HN  ASN A  19      29.577  65.232  49.951  1.00  0.00      1tnf H  
ATOM    120 1HD2 ASN A  19      28.343  68.610  52.958  1.00  0.00      1tnf H  
ATOM    121 2HD2 ASN A  19      29.445  69.125  54.239  1.00  0.00      1tnf H  
ATOM    122  N   PRO A  20      26.507  67.558  51.978  1.00 30.98      1tnf N  
ATOM    123  CA  PRO A  20      25.362  68.355  51.594  1.00 32.11      1tnf C  
ATOM    124  C   PRO A  20      25.647  69.855  51.615  1.00 33.21      1tnf C  
ATOM    125  O   PRO A  20      24.921  70.657  51.032  1.00 34.35      1tnf O  
ATOM    126  CB  PRO A  20      24.290  67.863  52.544  1.00 29.61      1tnf C  
ATOM    127  CG  PRO A  20      25.072  67.583  53.794  1.00 30.40      1tnf C  
ATOM    128  CD  PRO A  20      26.309  66.899  53.266  1.00 30.32      1tnf C  
ATOM    129  N   GLN A  21      26.714  70.256  52.307  1.00 35.27      1tnf N  
ATOM    130  CA  GLN A  21      27.136  71.638  52.348  1.00 35.92      1tnf C  
ATOM    131  C   GLN A  21      28.384  71.574  51.498  1.00 34.52      1tnf C  
ATOM    132  O   GLN A  21      29.438  71.299  52.071  1.00 34.80      1tnf O  
ATOM    133  CB  GLN A  21      27.506  72.086  53.769  1.00 38.47      1tnf C  
ATOM    134  CG  GLN A  21      28.033  73.543  53.770  1.00 44.40      1tnf C  
ATOM    135  CD  GLN A  21      28.870  74.022  54.972  1.00 47.92      1tnf C  
ATOM    136  NE2 GLN A  21      29.243  73.173  55.929  1.00 49.44      1tnf N  
ATOM    137  OE1 GLN A  21      29.225  75.204  55.083  1.00 48.53      1tnf O  
ATOM    138  HN  GLN A  21      27.252  69.562  52.826  1.00  0.00      1tnf H  
ATOM    139 1HE2 GLN A  21      29.797  73.490  56.725  1.00  0.00      1tnf H  
ATOM    140 2HE2 GLN A  21      28.951  72.200  55.838  1.00  0.00      1tnf H  
ATOM    141  N   ALA A  22      28.237  71.643  50.172  1.00 33.19      1tnf N  
ATOM    142  CA  ALA A  22      29.323  71.741  49.182  1.00 32.62      1tnf C  
ATOM    143  C   ALA A  22      28.656  72.151  47.861  1.00 32.85      1tnf C  
ATOM    144  O   ALA A  22      27.941  71.509  47.091  1.00 29.76      1tnf O  
ATOM    145  CB  ALA A  22      30.080  70.420  48.947  1.00 32.26      1tnf C  
ATOM    146  HN  ALA A  22      27.283  71.626  49.811  1.00  0.00      1tnf H  
ATOM    147  N   GLU A  23      28.807  73.448  47.743  1.00 35.51      1tnf N  
ATOM    148  CA  GLU A  23      28.242  74.207  46.670  1.00 34.85      1tnf C  
ATOM    149  C   GLU A  23      28.951  73.833  45.386  1.00 33.80      1tnf C  
ATOM    150  O   GLU A  23      30.183  73.943  45.298  1.00 35.71      1tnf O  
ATOM    151  CB  GLU A  23      28.396  75.695  47.033  1.00 37.38      1tnf C  
ATOM    152  CG  GLU A  23      29.806  76.259  47.176  1.00 39.33      1tnf C  
ATOM    153  CD  GLU A  23      30.332  76.976  45.922  1.00 44.02      1tnf C  
ATOM    154  OE1 GLU A  23      31.532  77.244  45.898  1.00 48.17      1tnf O  
ATOM    155  OE2 GLU A  23      29.590  77.302  44.978  1.00 44.13      1tnf O1-
ATOM    156  HN  GLU A  23      29.354  73.939  48.450  1.00  0.00      1tnf H  
ATOM    157  N   GLY A  24      28.132  73.200  44.531  1.00 31.92      1tnf N  
ATOM    158  CA  GLY A  24      28.479  72.887  43.135  1.00 26.01      1tnf C  
ATOM    159  C   GLY A  24      29.616  71.909  42.870  1.00 25.25      1tnf C  
ATOM    160  O   GLY A  24      30.474  72.144  42.021  1.00 23.85      1tnf O  
ATOM    161  HN  GLY A  24      27.212  72.918  44.870  1.00  0.00      1tnf H  
ATOM    162  N   GLN A  25      29.627  70.755  43.516  1.00 23.41      1tnf N  
ATOM    163  CA  GLN A  25      30.721  69.819  43.327  1.00 27.35      1tnf C  
ATOM    164  C   GLN A  25      30.283  68.482  43.939  1.00 24.58      1tnf C  
ATOM    165  O   GLN A  25      29.529  68.502  44.906  1.00 25.17      1tnf O  
ATOM    166  CB  GLN A  25      32.012  70.437  44.015  1.00 31.76      1tnf C  
ATOM    167  CG  GLN A  25      33.164  69.436  44.295  1.00 37.97      1tnf C  
ATOM    168  CD  GLN A  25      34.315  69.819  45.247  1.00 38.59      1tnf C  
ATOM    169  NE2 GLN A  25      34.290  70.949  45.932  1.00 40.91      1tnf N  
ATOM    170  OE1 GLN A  25      35.300  69.080  45.390  1.00 37.64      1tnf O  
ATOM    171  HN  GLN A  25      28.863  70.521  44.150  1.00  0.00      1tnf H  
ATOM    172 1HE2 GLN A  25      35.051  71.202  46.562  1.00  0.00      1tnf H  
ATOM    173 2HE2 GLN A  25      33.480  71.557  45.814  1.00  0.00      1tnf H  
ATOM    174  N   LEU A  26      30.589  67.288  43.423  1.00 22.66      1tnf N  
ATOM    175  CA  LEU A  26      30.251  66.086  44.168  1.00 18.95      1tnf C  
ATOM    176  C   LEU A  26      31.556  65.846  44.895  1.00 19.93      1tnf C  
ATOM    177  O   LEU A  26      32.664  65.876  44.347  1.00 21.46      1tnf O  
ATOM    178  CB  LEU A  26      29.915  64.900  43.273  1.00 16.35      1tnf C  
ATOM    179  CG  LEU A  26      29.431  63.548  43.858  1.00 17.85      1tnf C  
ATOM    180  CD1 LEU A  26      28.380  63.670  44.971  1.00 12.55      1tnf C  
ATOM    181  CD2 LEU A  26      28.878  62.770  42.661  1.00 16.95      1tnf C  
ATOM    182  HN  LEU A  26      31.054  67.221  42.518  1.00  0.00      1tnf H  
ATOM    183  N   GLN A  27      31.342  65.831  46.187  1.00 18.54      1tnf N  
ATOM    184  CA  GLN A  27      32.400  65.702  47.149  1.00 22.02      1tnf C  
ATOM    185  C   GLN A  27      31.932  64.645  48.120  1.00 23.10      1tnf C  
ATOM    186  O   GLN A  27      30.808  64.729  48.659  1.00 22.54      1tnf O  
ATOM    187  CB  GLN A  27      32.569  67.005  47.845  1.00 21.16      1tnf C  
ATOM    188  CG  GLN A  27      33.972  67.205  48.322  1.00 23.99      1tnf C  
ATOM    189  CD  GLN A  27      33.913  68.364  49.287  1.00 28.46      1tnf C  
ATOM    190  NE2 GLN A  27      33.956  68.061  50.590  1.00 27.65      1tnf N  
ATOM    191  OE1 GLN A  27      33.748  69.526  48.885  1.00 31.39      1tnf O  
ATOM    192  HN  GLN A  27      30.383  65.915  46.524  1.00  0.00      1tnf H  
ATOM    193 1HE2 GLN A  27      33.916  68.844  51.242  1.00  0.00      1tnf H  
ATOM    194 2HE2 GLN A  27      34.092  67.106  50.921  1.00  0.00      1tnf H  
ATOM    195  N   TRP A  28      32.770  63.625  48.272  1.00 21.53      1tnf N  
ATOM    196  CA  TRP A  28      32.399  62.536  49.156  1.00 24.26      1tnf C  
ATOM    197  C   TRP A  28      32.691  62.806  50.614  1.00 26.64      1tnf C  
ATOM    198  O   TRP A  28      33.332  63.806  50.947  1.00 29.80      1tnf O  
ATOM    199  CB  TRP A  28      33.092  61.284  48.710  1.00 22.48      1tnf C  
ATOM    200  CG  TRP A  28      32.548  60.914  47.348  1.00 21.19      1tnf C  
ATOM    201  CD1 TRP A  28      33.401  60.826  46.286  1.00 20.89      1tnf C  
ATOM    202  CD2 TRP A  28      31.232  60.696  47.024  1.00 21.11      1tnf C  
ATOM    203  CE2 TRP A  28      31.341  60.479  45.651  1.00 21.52      1tnf C  
ATOM    204  CE3 TRP A  28      30.003  60.652  47.651  1.00 20.70      1tnf C  
ATOM    205  NE1 TRP A  28      32.636  60.575  45.273  1.00 18.13      1tnf N  
ATOM    206  CZ2 TRP A  28      30.219  60.209  44.879  1.00 19.27      1tnf C  
ATOM    207  CZ3 TRP A  28      28.883  60.391  46.896  1.00 22.28      1tnf C  
ATOM    208  CH2 TRP A  28      28.996  60.174  45.520  1.00 23.65      1tnf C  
ATOM    209  HN  TRP A  28      33.660  63.608  47.775  1.00  0.00      1tnf H  
ATOM    210  HE1 TRP A  28      32.967  60.464  44.314  1.00  0.00      1tnf H  
ATOM    211  N   LEU A  29      32.196  61.912  51.470  1.00 30.47      1tnf N  
ATOM    212  CA  LEU A  29      32.212  62.064  52.927  1.00 32.94      1tnf C  
ATOM    213  C   LEU A  29      32.065  60.695  53.570  1.00 36.83      1tnf C  
ATOM    214  O   LEU A  29      31.418  59.843  52.964  1.00 37.74      1tnf O  
ATOM    215  CB  LEU A  29      31.013  62.880  53.396  1.00 30.36      1tnf C  
ATOM    216  CG  LEU A  29      31.134  64.073  54.241  1.00 25.77      1tnf C  
ATOM    217  CD1 LEU A  29      31.936  65.099  53.513  1.00 26.01      1tnf C  
ATOM    218  CD2 LEU A  29      29.753  64.572  54.559  1.00 28.52      1tnf C  
ATOM    219  HN  LEU A  29      31.778  61.065  51.085  1.00  0.00      1tnf H  
ATOM    220  N   ASN A  30      32.590  60.375  54.751  1.00 43.17      1tnf N  
ATOM    221  CA  ASN A  30      32.221  59.107  55.386  1.00 47.00      1tnf C  
ATOM    222  C   ASN A  30      31.769  59.513  56.790  1.00 47.64      1tnf C  
ATOM    223  O   ASN A  30      30.983  60.454  56.797  1.00 48.92      1tnf O  
ATOM    224  CB  ASN A  30      33.406  58.116  55.401  1.00 48.42      1tnf C  
ATOM    225  CG  ASN A  30      34.702  58.743  55.844  1.00 50.78      1tnf C  
ATOM    226  ND2 ASN A  30      35.709  58.760  54.985  1.00 51.77      1tnf N  
ATOM    227  OD1 ASN A  30      34.807  59.265  56.948  1.00 53.49      1tnf O  
ATOM    228  HN  ASN A  30      33.245  61.008  55.211  1.00  0.00      1tnf H  
ATOM    229 1HD2 ASN A  30      35.622  58.326  54.066  1.00  0.00      1tnf H  
ATOM    230 2HD2 ASN A  30      36.587  59.185  55.285  1.00  0.00      1tnf H  
ATOM    231  N   ARG A  31      32.080  58.976  57.965  1.00 49.82      1tnf N  
ATOM    232  CA  ARG A  31      31.572  59.383  59.302  1.00 54.96      1tnf C  
ATOM    233  C   ARG A  31      30.061  59.315  59.569  1.00 55.30      1tnf C  
ATOM    234  O   ARG A  31      29.680  59.080  60.720  1.00 55.18      1tnf O  
ATOM    235  CB  ARG A  31      31.996  60.833  59.708  1.00 55.55      1tnf C  
ATOM    236  CG  ARG A  31      31.132  62.024  59.242  1.00 58.05      1tnf C  
ATOM    237  CD  ARG A  31      31.993  63.238  58.967  1.00 58.87      1tnf C  
ATOM    238  NE  ARG A  31      33.081  62.895  58.063  1.00 61.77      1tnf N  
ATOM    239  CZ  ARG A  31      34.031  63.784  57.744  1.00 64.08      1tnf C  
ATOM    240  NH1 ARG A  31      35.026  63.396  56.931  1.00 62.80      1tnf N1+
ATOM    241  NH2 ARG A  31      33.980  65.058  58.194  1.00 64.51      1tnf N  
ATOM    242  HN  ARG A  31      32.740  58.199  57.948  1.00  0.00      1tnf H  
ATOM    243  HE  ARG A  31      33.121  61.957  57.664  1.00  0.00      1tnf H  
ATOM    244 1HH1 ARG A  31      35.749  64.073  56.688  1.00  0.00      1tnf H  
ATOM    245 2HH1 ARG A  31      35.064  62.435  56.592  1.00  0.00      1tnf H  
ATOM    246 1HH2 ARG A  31      34.703  65.735  57.951  1.00  0.00      1tnf H  
ATOM    247 2HH2 ARG A  31      33.224  65.353  58.812  1.00  0.00      1tnf H  
ATOM    248  N   ARG A  32      29.213  59.561  58.549  1.00 54.64      1tnf N  
ATOM    249  CA  ARG A  32      27.765  59.548  58.600  1.00 52.37      1tnf C  
ATOM    250  C   ARG A  32      27.159  58.179  58.897  1.00 50.97      1tnf C  
ATOM    251  O   ARG A  32      27.846  57.237  59.294  1.00 50.23      1tnf O  
ATOM    252  CB  ARG A  32      27.256  60.066  57.268  1.00 50.95      1tnf C  
ATOM    253  CG  ARG A  32      26.076  60.945  57.576  1.00 53.11      1tnf C  
ATOM    254  CD  ARG A  32      25.000  60.945  56.521  1.00 53.15      1tnf C  
ATOM    255  NE  ARG A  32      25.355  61.857  55.472  1.00 53.46      1tnf N  
ATOM    256  CZ  ARG A  32      24.652  62.909  55.083  1.00 53.31      1tnf C  
ATOM    257  NH1 ARG A  32      25.132  63.611  54.060  1.00 55.38      1tnf N1+
ATOM    258  NH2 ARG A  32      23.523  63.286  55.654  1.00 49.48      1tnf N  
ATOM    259  HN  ARG A  32      29.636  59.779  57.647  1.00  0.00      1tnf H  
ATOM    260  HE  ARG A  32      26.231  61.678  54.980  1.00  0.00      1tnf H  
ATOM    261 1HH1 ARG A  32      26.004  63.320  53.619  1.00  0.00      1tnf H  
ATOM    262 2HH1 ARG A  32      24.590  64.422  53.760  1.00  0.00      1tnf H  
ATOM    263 1HH2 ARG A  32      23.155  62.748  56.438  1.00  0.00      1tnf H  
ATOM    264 2HH2 ARG A  32      22.981  64.097  55.354  1.00  0.00      1tnf H  
ATOM    265  N   ALA A  33      25.867  58.046  58.624  1.00 49.92      1tnf N  
ATOM    266  CA  ALA A  33      25.138  56.843  58.887  1.00 53.01      1tnf C  
ATOM    267  C   ALA A  33      25.797  55.495  58.631  1.00 55.12      1tnf C  
ATOM    268  O   ALA A  33      26.086  54.706  59.542  1.00 56.64      1tnf O  
ATOM    269  CB  ALA A  33      23.838  56.887  58.106  1.00 53.63      1tnf C  
ATOM    270  HN  ALA A  33      25.372  58.835  58.209  1.00  0.00      1tnf H  
ATOM    271  N   ASN A  34      26.019  55.227  57.354  1.00 54.60      1tnf N  
ATOM    272  CA  ASN A  34      26.636  53.976  56.964  1.00 53.71      1tnf C  
ATOM    273  C   ASN A  34      27.679  54.519  56.055  1.00 51.32      1tnf C  
ATOM    274  O   ASN A  34      27.590  54.480  54.819  1.00 51.25      1tnf O  
ATOM    275  CB  ASN A  34      25.674  53.106  56.195  1.00 56.05      1tnf C  
ATOM    276  CG  ASN A  34      24.841  52.294  57.152  1.00 57.85      1tnf C  
ATOM    277  ND2 ASN A  34      23.611  52.757  57.393  1.00 57.98      1tnf N  
ATOM    278  OD1 ASN A  34      25.282  51.252  57.644  1.00 58.19      1tnf O  
ATOM    279  HN  ASN A  34      25.754  55.906  56.640  1.00  0.00      1tnf H  
ATOM    280 1HD2 ASN A  34      23.047  52.207  58.041  1.00  0.00      1tnf H  
ATOM    281 2HD2 ASN A  34      23.246  53.618  56.986  1.00  0.00      1tnf H  
ATOM    282  N   ALA A  35      28.577  55.201  56.727  1.00 48.07      1tnf N  
ATOM    283  CA  ALA A  35      29.590  55.831  55.951  1.00 47.43      1tnf C  
ATOM    284  C   ALA A  35      30.916  55.194  56.338  1.00 46.77      1tnf C  
ATOM    285  O   ALA A  35      31.735  55.677  57.147  1.00 47.25      1tnf O  
ATOM    286  CB  ALA A  35      29.473  57.308  56.231  1.00 45.10      1tnf C  
ATOM    287  HN  ALA A  35      28.550  55.275  57.744  1.00  0.00      1tnf H  
ATOM    288  N   LEU A  36      31.021  54.007  55.718  1.00 42.77      1tnf N  
ATOM    289  CA  LEU A  36      32.108  53.095  56.010  1.00 37.92      1tnf C  
ATOM    290  C   LEU A  36      33.367  53.392  55.253  1.00 35.46      1tnf C  
ATOM    291  O   LEU A  36      33.309  53.772  54.082  1.00 36.94      1tnf O  
ATOM    292  CB  LEU A  36      31.766  51.643  55.680  1.00 35.87      1tnf C  
ATOM    293  CG  LEU A  36      30.817  50.887  56.592  1.00 36.51      1tnf C  
ATOM    294  CD1 LEU A  36      29.365  50.997  56.113  1.00 33.66      1tnf C  
ATOM    295  CD2 LEU A  36      31.304  49.443  56.648  1.00 35.35      1tnf C  
ATOM    296  HN  LEU A  36      30.320  53.742  55.026  1.00  0.00      1tnf H  
ATOM    297  N   LEU A  37      34.488  53.242  55.931  1.00 32.05      1tnf N  
ATOM    298  CA  LEU A  37      35.792  53.212  55.268  1.00 30.74      1tnf C  
ATOM    299  C   LEU A  37      36.322  52.186  56.211  1.00 29.22      1tnf C  
ATOM    300  O   LEU A  37      36.319  52.417  57.425  1.00 31.28      1tnf O  
ATOM    301  CB  LEU A  37      36.687  54.431  55.434  1.00 29.41      1tnf C  
ATOM    302  CG  LEU A  37      37.258  55.078  54.188  1.00 29.27      1tnf C  
ATOM    303  CD1 LEU A  37      36.170  55.805  53.403  1.00 29.15      1tnf C  
ATOM    304  CD2 LEU A  37      38.280  56.113  54.596  1.00 28.92      1tnf C  
ATOM    305  HN  LEU A  37      34.445  53.144  56.945  1.00  0.00      1tnf H  
ATOM    306  N   ALA A  38      36.611  51.022  55.649  1.00 29.86      1tnf N  
ATOM    307  CA  ALA A  38      37.101  49.900  56.398  1.00 26.54      1tnf C  
ATOM    308  C   ALA A  38      38.504  49.440  56.013  1.00 26.52      1tnf C  
ATOM    309  O   ALA A  38      39.414  50.265  55.850  1.00 28.92      1tnf O  
ATOM    310  CB  ALA A  38      36.068  48.763  56.265  1.00 29.06      1tnf C  
ATOM    311  HN  ALA A  38      36.480  50.919  54.643  1.00  0.00      1tnf H  
ATOM    312  N   ASN A  39      38.705  48.152  55.788  1.00 24.56      1tnf N  
ATOM    313  CA  ASN A  39      40.013  47.531  55.755  1.00 22.91      1tnf C  
ATOM    314  C   ASN A  39      40.925  47.976  54.618  1.00 25.44      1tnf C  
ATOM    315  O   ASN A  39      41.083  47.294  53.585  1.00 27.15      1tnf O  
ATOM    316  CB  ASN A  39      39.825  45.977  55.730  1.00 23.29      1tnf C  
ATOM    317  CG  ASN A  39      38.707  45.373  56.615  1.00 23.36      1tnf C  
ATOM    318  ND2 ASN A  39      38.707  44.139  57.075  1.00 18.97      1tnf N  
ATOM    319  OD1 ASN A  39      37.711  46.033  56.896  1.00 22.72      1tnf O  
ATOM    320  HN  ASN A  39      37.890  47.561  55.628  1.00  0.00      1tnf H  
ATOM    321 1HD2 ASN A  39      39.535  43.591  56.841  1.00  0.00      1tnf H  
ATOM    322 2HD2 ASN A  39      37.971  43.741  57.658  1.00  0.00      1tnf H  
ATOM    323  N   GLY A  40      41.511  49.163  54.753  1.00 23.38      1tnf N  
ATOM    324  CA  GLY A  40      42.540  49.564  53.804  1.00 27.47      1tnf C  
ATOM    325  C   GLY A  40      42.092  50.446  52.656  1.00 27.86      1tnf C  
ATOM    326  O   GLY A  40      42.889  50.864  51.807  1.00 26.24      1tnf O  
ATOM    327  HN  GLY A  40      41.242  49.786  55.514  1.00  0.00      1tnf H  
ATOM    328  N   VAL A  41      40.788  50.674  52.616  1.00 27.79      1tnf N  
ATOM    329  CA  VAL A  41      40.220  51.553  51.637  1.00 23.75      1tnf C  
ATOM    330  C   VAL A  41      40.477  52.891  52.282  1.00 22.85      1tnf C  
ATOM    331  O   VAL A  41      40.219  53.108  53.456  1.00 23.30      1tnf O  
ATOM    332  CB  VAL A  41      38.754  51.248  51.489  1.00 22.85      1tnf C  
ATOM    333  CG1 VAL A  41      38.056  52.213  50.555  1.00 27.69      1tnf C  
ATOM    334  CG2 VAL A  41      38.650  49.881  50.879  1.00 22.40      1tnf C  
ATOM    335  HN  VAL A  41      40.178  50.216  53.293  1.00  0.00      1tnf H  
ATOM    336  N   GLU A  42      41.066  53.739  51.469  1.00 27.81      1tnf N  
ATOM    337  CA  GLU A  42      41.473  55.084  51.810  1.00 27.32      1tnf C  
ATOM    338  C   GLU A  42      40.745  55.952  50.788  1.00 25.71      1tnf C  
ATOM    339  O   GLU A  42      40.790  55.670  49.587  1.00 25.92      1tnf O  
ATOM    340  CB  GLU A  42      42.958  55.179  51.612  1.00 29.74      1tnf C  
ATOM    341  CG  GLU A  42      43.670  56.455  51.967  1.00 34.34      1tnf C  
ATOM    342  CD  GLU A  42      44.211  56.527  53.408  1.00 38.12      1tnf C  
ATOM    343  OE1 GLU A  42      44.209  57.652  53.967  1.00 36.66      1tnf O  
ATOM    344  OE2 GLU A  42      44.637  55.477  53.940  1.00 36.25      1tnf O1-
ATOM    345  HN  GLU A  42      41.252  53.422  50.518  1.00  0.00      1tnf H  
ATOM    346  N   LEU A  43      40.025  56.954  51.258  1.00 21.99      1tnf N  
ATOM    347  CA  LEU A  43      39.368  57.938  50.419  1.00 20.77      1tnf C  
ATOM    348  C   LEU A  43      40.381  59.054  50.275  1.00 20.50      1tnf C  
ATOM    349  O   LEU A  43      41.060  59.365  51.230  1.00 20.29      1tnf O  
ATOM    350  CB  LEU A  43      38.132  58.315  51.171  1.00 21.91      1tnf C  
ATOM    351  CG  LEU A  43      37.023  59.256  50.789  1.00 20.32      1tnf C  
ATOM    352  CD1 LEU A  43      37.101  60.309  51.878  1.00 23.92      1tnf C  
ATOM    353  CD2 LEU A  43      37.098  59.808  49.370  1.00 22.24      1tnf C  
ATOM    354  HN  LEU A  43      39.925  57.041  52.269  1.00  0.00      1tnf H  
ATOM    355  N   ARG A  44      40.625  59.628  49.120  1.00 23.75      1tnf N  
ATOM    356  CA  ARG A  44      41.651  60.638  49.049  1.00 26.89      1tnf C  
ATOM    357  C   ARG A  44      41.126  61.955  48.469  1.00 25.77      1tnf C  
ATOM    358  O   ARG A  44      40.326  62.657  49.112  1.00 23.38      1tnf O  
ATOM    359  CB  ARG A  44      42.797  59.937  48.262  1.00 29.89      1tnf C  
ATOM    360  CG  ARG A  44      44.260  60.227  48.631  1.00 36.00      1tnf C  
ATOM    361  CD  ARG A  44      44.855  59.822  50.002  1.00 40.28      1tnf C  
ATOM    362  NE  ARG A  44      46.157  60.497  50.097  1.00 44.47      1tnf N  
ATOM    363  CZ  ARG A  44      46.607  61.210  51.154  1.00 45.70      1tnf C  
ATOM    364  NH1 ARG A  44      47.724  61.927  50.968  1.00 46.55      1tnf N1+
ATOM    365  NH2 ARG A  44      46.069  61.163  52.393  1.00 46.12      1tnf N  
ATOM    366  HN  ARG A  44      40.098  59.364  48.288  1.00  0.00      1tnf H  
ATOM    367  HE  ARG A  44      46.778  60.421  49.292  1.00  0.00      1tnf H  
ATOM    368 1HH1 ARG A  44      48.130  61.962  50.033  1.00  0.00      1tnf H  
ATOM    369 2HH1 ARG A  44      48.063  62.465  51.765  1.00  0.00      1tnf H  
ATOM    370 1HH2 ARG A  44      45.219  60.617  52.535  1.00  0.00      1tnf H  
ATOM    371 2HH2 ARG A  44      46.408  61.701  53.190  1.00  0.00      1tnf H  
ATOM    372  N   ASP A  45      41.489  62.323  47.238  1.00 23.15      1tnf N  
ATOM    373  CA  ASP A  45      41.152  63.601  46.605  1.00 19.93      1tnf C  
ATOM    374  C   ASP A  45      39.832  63.450  45.887  1.00 16.09      1tnf C  
ATOM    375  O   ASP A  45      39.772  63.464  44.649  1.00 21.74      1tnf O  
ATOM    376  CB  ASP A  45      42.217  63.923  45.605  1.00 21.50      1tnf C  
ATOM    377  CG  ASP A  45      43.612  63.945  46.161  1.00 23.86      1tnf C  
ATOM    378  OD1 ASP A  45      44.132  62.907  46.570  1.00 25.32      1tnf O  
ATOM    379  OD2 ASP A  45      44.191  65.026  46.155  1.00 28.39      1tnf O1-
ATOM    380  HN  ASP A  45      42.045  61.662  46.695  1.00  0.00      1tnf H  
ATOM    381  N   ASN A  46      38.792  63.221  46.662  1.00 10.26      1tnf N  
ATOM    382  CA  ASN A  46      37.447  62.890  46.206  1.00 11.24      1tnf C  
ATOM    383  C   ASN A  46      37.329  61.463  45.597  1.00 14.96      1tnf C  
ATOM    384  O   ASN A  46      36.331  61.161  44.912  1.00 13.64      1tnf O  
ATOM    385  CB  ASN A  46      36.991  63.902  45.179  1.00  6.68      1tnf C  
ATOM    386  CG  ASN A  46      35.599  64.415  45.400  1.00 10.32      1tnf C  
ATOM    387  ND2 ASN A  46      35.344  65.664  45.066  1.00 15.47      1tnf N  
ATOM    388  OD1 ASN A  46      34.721  63.769  45.953  1.00 12.79      1tnf O  
ATOM    389  HN  ASN A  46      38.940  63.280  47.669  1.00  0.00      1tnf H  
ATOM    390 1HD2 ASN A  46      34.397  66.013  45.216  1.00  0.00      1tnf H  
ATOM    391 2HD2 ASN A  46      36.077  66.203  44.605  1.00  0.00      1tnf H  
ATOM    392  N   GLN A  47      38.314  60.530  45.861  1.00 13.07      1tnf N  
ATOM    393  CA  GLN A  47      38.394  59.223  45.192  1.00 11.44      1tnf C  
ATOM    394  C   GLN A  47      38.698  58.021  46.047  1.00  8.36      1tnf C  
ATOM    395  O   GLN A  47      39.264  58.239  47.093  1.00  9.82      1tnf O  
ATOM    396  CB  GLN A  47      39.450  59.242  44.137  1.00 15.31      1tnf C  
ATOM    397  CG  GLN A  47      39.272  60.321  43.106  1.00 16.79      1tnf C  
ATOM    398  CD  GLN A  47      40.369  60.254  42.067  1.00 20.97      1tnf C  
ATOM    399  NE2 GLN A  47      40.935  61.354  41.591  1.00 19.69      1tnf N  
ATOM    400  OE1 GLN A  47      40.758  59.166  41.660  1.00 22.48      1tnf O  
ATOM    401  HN  GLN A  47      39.023  60.760  46.557  1.00  0.00      1tnf H  
ATOM    402 1HE2 GLN A  47      41.675  61.309  40.890  1.00  0.00      1tnf H  
ATOM    403 2HE2 GLN A  47      40.611  62.260  41.930  1.00  0.00      1tnf H  
ATOM    404  N   LEU A  48      38.430  56.779  45.700  1.00  7.96      1tnf N  
ATOM    405  CA  LEU A  48      38.734  55.639  46.560  1.00 11.62      1tnf C  
ATOM    406  C   LEU A  48      39.976  54.853  46.150  1.00 15.40      1tnf C  
ATOM    407  O   LEU A  48      40.046  54.390  45.020  1.00 20.50      1tnf O  
ATOM    408  CB  LEU A  48      37.518  54.700  46.592  1.00  9.21      1tnf C  
ATOM    409  CG  LEU A  48      36.401  54.895  47.647  1.00 12.33      1tnf C  
ATOM    410  CD1 LEU A  48      36.673  56.180  48.430  1.00 12.65      1tnf C  
ATOM    411  CD2 LEU A  48      35.027  54.930  47.004  1.00  5.83      1tnf C  
ATOM    412  HN  LEU A  48      37.993  56.607  44.795  1.00  0.00      1tnf H  
ATOM    413  N   VAL A  49      41.023  54.741  46.946  1.00 20.06      1tnf N  
ATOM    414  CA  VAL A  49      42.199  53.968  46.570  1.00 24.56      1tnf C  
ATOM    415  C   VAL A  49      41.959  52.547  47.066  1.00 28.11      1tnf C  
ATOM    416  O   VAL A  49      41.651  52.293  48.239  1.00 27.53      1tnf O  
ATOM    417  CB  VAL A  49      43.557  54.482  47.215  1.00 23.38      1tnf C  
ATOM    418  CG1 VAL A  49      44.689  53.447  46.959  1.00 19.09      1tnf C  
ATOM    419  CG2 VAL A  49      43.945  55.847  46.624  1.00 17.48      1tnf C  
ATOM    420  HN  VAL A  49      41.008  55.210  47.852  1.00  0.00      1tnf H  
ATOM    421  N   VAL A  50      42.079  51.663  46.073  1.00 31.22      1tnf N  
ATOM    422  CA  VAL A  50      41.972  50.234  46.312  1.00 31.44      1tnf C  
ATOM    423  C   VAL A  50      43.174  49.609  47.066  1.00 32.44      1tnf C  
ATOM    424  O   VAL A  50      44.346  49.747  46.699  1.00 29.34      1tnf O  
ATOM    425  CB  VAL A  50      41.737  49.596  44.927  1.00 29.88      1tnf C  
ATOM    426  CG1 VAL A  50      41.709  48.072  45.011  1.00 30.05      1tnf C  
ATOM    427  CG2 VAL A  50      40.405  50.123  44.410  1.00 27.21      1tnf C  
ATOM    428  HN  VAL A  50      42.250  51.998  45.125  1.00  0.00      1tnf H  
ATOM    429  N   PRO A  51      42.906  48.890  48.159  1.00 34.92      1tnf N  
ATOM    430  CA  PRO A  51      43.892  48.042  48.845  1.00 32.18      1tnf C  
ATOM    431  C   PRO A  51      44.293  46.681  48.274  1.00 29.76      1tnf C  
ATOM    432  O   PRO A  51      45.477  46.360  48.280  1.00 24.27      1tnf O  
ATOM    433  CB  PRO A  51      43.318  47.930  50.230  1.00 32.83      1tnf C  
ATOM    434  CG  PRO A  51      41.836  47.894  49.955  1.00 34.85      1tnf C  
ATOM    435  CD  PRO A  51      41.676  49.024  48.962  1.00 34.29      1tnf C  
ATOM    436  N   SER A  52      43.365  45.883  47.735  1.00 32.00      1tnf N  
ATOM    437  CA  SER A  52      43.637  44.474  47.422  1.00 31.77      1tnf C  
ATOM    438  C   SER A  52      43.231  43.993  46.020  1.00 30.11      1tnf C  
ATOM    439  O   SER A  52      42.378  44.567  45.338  1.00 28.56      1tnf O  
ATOM    440  CB  SER A  52      42.947  43.604  48.480  1.00 29.47      1tnf C  
ATOM    441  OG  SER A  52      42.864  44.295  49.733  1.00 31.58      1tnf O  
ATOM    442  HN  SER A  52      42.440  46.264  47.535  1.00  0.00      1tnf H  
ATOM    443  HG  SER A  52      42.437  43.756  50.388  1.00  0.00      1tnf H  
ATOM    444  N   GLU A  53      43.927  42.959  45.530  1.00 28.01      1tnf N  
ATOM    445  CA  GLU A  53      43.614  42.468  44.216  1.00 28.07      1tnf C  
ATOM    446  C   GLU A  53      42.422  41.598  44.559  1.00 28.08      1tnf C  
ATOM    447  O   GLU A  53      42.456  40.876  45.565  1.00 28.60      1tnf O  
ATOM    448  CB  GLU A  53      44.775  41.644  43.594  1.00 30.65      1tnf C  
ATOM    449  CG  GLU A  53      44.898  42.040  42.088  1.00 35.56      1tnf C  
ATOM    450  CD  GLU A  53      45.825  41.286  41.106  1.00 35.62      1tnf C  
ATOM    451  OE1 GLU A  53      45.303  40.537  40.291  1.00 37.02      1tnf O  
ATOM    452  OE2 GLU A  53      47.049  41.465  41.091  1.00 35.27      1tnf O1-
ATOM    453  HN  GLU A  53      44.668  42.526  46.081  1.00  0.00      1tnf H  
ATOM    454  N   GLY A  54      41.326  41.809  43.840  1.00 27.71      1tnf N  
ATOM    455  CA  GLY A  54      40.138  40.996  44.029  1.00 28.17      1tnf C  
ATOM    456  C   GLY A  54      38.957  41.580  43.279  1.00 28.24      1tnf C  
ATOM    457  O   GLY A  54      39.094  42.591  42.562  1.00 28.46      1tnf O  
ATOM    458  HN  GLY A  54      41.318  42.554  43.144  1.00  0.00      1tnf H  
ATOM    459  N   LEU A  55      37.814  40.900  43.378  1.00 25.44      1tnf N  
ATOM    460  CA  LEU A  55      36.605  41.414  42.791  1.00 23.62      1tnf C  
ATOM    461  C   LEU A  55      36.044  42.394  43.799  1.00 23.67      1tnf C  
ATOM    462  O   LEU A  55      36.220  42.200  45.008  1.00 29.37      1tnf O  
ATOM    463  CB  LEU A  55      35.630  40.302  42.558  1.00 22.23      1tnf C  
ATOM    464  CG  LEU A  55      35.713  39.531  41.248  1.00 24.33      1tnf C  
ATOM    465  CD1 LEU A  55      37.055  39.769  40.551  1.00 23.62      1tnf C  
ATOM    466  CD2 LEU A  55      35.426  38.049  41.564  1.00 22.15      1tnf C  
ATOM    467  HN  LEU A  55      37.797  40.009  43.874  1.00  0.00      1tnf H  
ATOM    468  N   TYR A  56      35.458  43.488  43.337  1.00 19.56      1tnf N  
ATOM    469  CA  TYR A  56      34.814  44.419  44.224  1.00 17.05      1tnf C  
ATOM    470  C   TYR A  56      33.446  44.602  43.600  1.00 13.43      1tnf C  
ATOM    471  O   TYR A  56      33.239  44.313  42.435  1.00 14.34      1tnf O  
ATOM    472  CB  TYR A  56      35.551  45.803  44.308  1.00 18.91      1tnf C  
ATOM    473  CG  TYR A  56      36.854  45.786  45.097  1.00 17.67      1tnf C  
ATOM    474  CD1 TYR A  56      37.981  45.183  44.561  1.00 19.66      1tnf C  
ATOM    475  CD2 TYR A  56      36.921  46.316  46.361  1.00 19.13      1tnf C  
ATOM    476  CE1 TYR A  56      39.159  45.096  45.270  1.00 17.87      1tnf C  
ATOM    477  CE2 TYR A  56      38.105  46.237  47.078  1.00 18.10      1tnf C  
ATOM    478  CZ  TYR A  56      39.216  45.624  46.534  1.00 17.03      1tnf C  
ATOM    479  OH  TYR A  56      40.391  45.504  47.264  1.00 16.58      1tnf O  
ATOM    480  HN  TYR A  56      35.463  43.674  42.334  1.00  0.00      1tnf H  
ATOM    481  HH  TYR A  56      40.430  45.870  48.140  1.00  0.00      1tnf H  
ATOM    482  N   LEU A  57      32.470  45.002  44.395  1.00 13.44      1tnf N  
ATOM    483  CA  LEU A  57      31.148  45.328  43.942  1.00 12.21      1tnf C  
ATOM    484  C   LEU A  57      31.218  46.846  44.100  1.00 15.67      1tnf C  
ATOM    485  O   LEU A  57      31.537  47.334  45.191  1.00 18.49      1tnf O  
ATOM    486  CB  LEU A  57      30.141  44.721  44.874  1.00  9.72      1tnf C  
ATOM    487  CG  LEU A  57      28.999  44.024  44.268  1.00 11.19      1tnf C  
ATOM    488  CD1 LEU A  57      28.168  43.305  45.331  1.00 16.60      1tnf C  
ATOM    489  CD2 LEU A  57      28.140  45.058  43.597  1.00 14.21      1tnf C  
ATOM    490  HN  LEU A  57      32.668  45.084  45.392  1.00  0.00      1tnf H  
ATOM    491  N   ILE A  58      30.996  47.588  43.013  1.00 14.79      1tnf N  
ATOM    492  CA  ILE A  58      31.100  49.034  43.011  1.00 13.92      1tnf C  
ATOM    493  C   ILE A  58      29.676  49.441  42.703  1.00 14.63      1tnf C  
ATOM    494  O   ILE A  58      29.155  49.010  41.673  1.00 15.44      1tnf O  
ATOM    495  CB  ILE A  58      32.059  49.537  41.893  1.00 14.35      1tnf C  
ATOM    496  CG1 ILE A  58      33.372  48.708  41.847  1.00 16.06      1tnf C  
ATOM    497  CG2 ILE A  58      32.385  50.993  42.182  1.00 14.13      1tnf C  
ATOM    498  CD1 ILE A  58      34.396  48.966  40.705  1.00 14.24      1tnf C  
ATOM    499  HN  ILE A  58      30.742  47.117  42.145  1.00  0.00      1tnf H  
ATOM    500  N   TYR A  59      29.015  50.174  43.590  1.00 14.55      1tnf N  
ATOM    501  CA  TYR A  59      27.627  50.596  43.383  1.00 15.88      1tnf C  
ATOM    502  C   TYR A  59      27.581  52.081  43.563  1.00 13.56      1tnf C  
ATOM    503  O   TYR A  59      28.535  52.561  44.173  1.00 18.97      1tnf O  
ATOM    504  CB  TYR A  59      26.624  50.002  44.390  1.00 11.99      1tnf C  
ATOM    505  CG  TYR A  59      26.997  50.138  45.850  1.00 14.27      1tnf C  
ATOM    506  CD1 TYR A  59      26.601  51.261  46.587  1.00 15.44      1tnf C  
ATOM    507  CD2 TYR A  59      27.689  49.102  46.454  1.00 14.29      1tnf C  
ATOM    508  CE1 TYR A  59      26.884  51.352  47.943  1.00 13.98      1tnf C  
ATOM    509  CE2 TYR A  59      27.976  49.195  47.802  1.00 15.81      1tnf C  
ATOM    510  CZ  TYR A  59      27.569  50.307  48.543  1.00 15.33      1tnf C  
ATOM    511  OH  TYR A  59      27.782  50.340  49.920  1.00 18.55      1tnf O  
ATOM    512  HN  TYR A  59      29.491  50.454  44.448  1.00  0.00      1tnf H  
ATOM    513  HH  TYR A  59      27.505  51.096  50.424  1.00  0.00      1tnf H  
ATOM    514  N   SER A  60      26.559  52.809  43.140  1.00 11.06      1tnf N  
ATOM    515  CA  SER A  60      26.482  54.233  43.474  1.00 10.79      1tnf C  
ATOM    516  C   SER A  60      25.092  54.768  43.149  1.00  9.66      1tnf C  
ATOM    517  O   SER A  60      24.489  54.357  42.143  1.00 10.08      1tnf O  
ATOM    518  CB  SER A  60      27.590  54.997  42.688  1.00  8.82      1tnf C  
ATOM    519  OG  SER A  60      27.639  56.411  42.729  1.00 12.35      1tnf O  
ATOM    520  HN  SER A  60      25.824  52.377  42.580  1.00  0.00      1tnf H  
ATOM    521  HG  SER A  60      28.314  56.877  42.250  1.00  0.00      1tnf H  
ATOM    522  N   GLN A  61      24.521  55.639  43.961  1.00  6.73      1tnf N  
ATOM    523  CA  GLN A  61      23.271  56.220  43.512  1.00 10.16      1tnf C  
ATOM    524  C   GLN A  61      23.359  57.736  43.584  1.00 11.20      1tnf C  
ATOM    525  O   GLN A  61      24.125  58.226  44.417  1.00 15.41      1tnf O  
ATOM    526  CB  GLN A  61      22.145  55.754  44.375  1.00 13.56      1tnf C  
ATOM    527  CG  GLN A  61      20.782  56.209  43.812  1.00 15.82      1tnf C  
ATOM    528  CD  GLN A  61      19.622  56.328  44.794  1.00 11.97      1tnf C  
ATOM    529  NE2 GLN A  61      19.380  57.595  45.070  1.00  6.05      1tnf N  
ATOM    530  OE1 GLN A  61      19.016  55.353  45.248  1.00  9.86      1tnf O  
ATOM    531  HN  GLN A  61      24.938  55.890  44.857  1.00  0.00      1tnf H  
ATOM    532 1HE2 GLN A  61      18.604  57.675  45.727  1.00  0.00      1tnf H  
ATOM    533 2HE2 GLN A  61      19.881  58.401  44.695  1.00  0.00      1tnf H  
ATOM    534  N   VAL A  62      22.715  58.527  42.727  1.00 11.04      1tnf N  
ATOM    535  CA  VAL A  62      22.628  59.986  42.905  1.00 12.91      1tnf C  
ATOM    536  C   VAL A  62      21.198  60.318  42.572  1.00 13.69      1tnf C  
ATOM    537  O   VAL A  62      20.440  59.532  41.979  1.00 19.64      1tnf O  
ATOM    538  CB  VAL A  62      23.454  60.903  41.983  1.00 11.86      1tnf C  
ATOM    539  CG1 VAL A  62      24.898  60.621  42.220  1.00 14.88      1tnf C  
ATOM    540  CG2 VAL A  62      23.169  60.666  40.532  1.00 17.68      1tnf C  
ATOM    541  HN  VAL A  62      22.264  58.105  41.915  1.00  0.00      1tnf H  
ATOM    542  N   LEU A  63      20.790  61.493  42.964  1.00 13.71      1tnf N  
ATOM    543  CA  LEU A  63      19.415  61.871  42.788  1.00 12.38      1tnf C  
ATOM    544  C   LEU A  63      19.516  63.198  42.116  1.00 16.17      1tnf C  
ATOM    545  O   LEU A  63      20.505  63.904  42.312  1.00 20.45      1tnf O  
ATOM    546  CB  LEU A  63      18.728  62.049  44.114  1.00 12.09      1tnf C  
ATOM    547  CG  LEU A  63      18.338  60.885  44.993  1.00 11.55      1tnf C  
ATOM    548  CD1 LEU A  63      17.260  61.360  45.923  1.00 14.43      1tnf C  
ATOM    549  CD2 LEU A  63      17.625  59.820  44.239  1.00 17.26      1tnf C  
ATOM    550  HN  LEU A  63      21.447  62.143  43.395  1.00  0.00      1tnf H  
ATOM    551  N   PHE A  64      18.549  63.608  41.330  1.00 18.17      1tnf N  
ATOM    552  CA  PHE A  64      18.622  64.933  40.759  1.00 17.89      1tnf C  
ATOM    553  C   PHE A  64      17.244  65.534  40.933  1.00 20.82      1tnf C  
ATOM    554  O   PHE A  64      16.227  64.817  40.866  1.00 25.14      1tnf O  
ATOM    555  CB  PHE A  64      18.996  64.847  39.303  1.00 16.97      1tnf C  
ATOM    556  CG  PHE A  64      20.438  64.479  39.019  1.00 12.46      1tnf C  
ATOM    557  CD1 PHE A  64      20.772  63.193  38.612  1.00 12.31      1tnf C  
ATOM    558  CD2 PHE A  64      21.402  65.447  39.072  1.00 10.95      1tnf C  
ATOM    559  CE1 PHE A  64      22.074  62.897  38.243  1.00 11.38      1tnf C  
ATOM    560  CE2 PHE A  64      22.692  65.144  38.705  1.00 10.69      1tnf C  
ATOM    561  CZ  PHE A  64      23.031  63.877  38.288  1.00 11.54      1tnf C  
ATOM    562  HN  PHE A  64      17.756  63.000  41.125  1.00  0.00      1tnf H  
ATOM    563  N   LYS A  65      17.178  66.820  41.231  1.00 20.18      1tnf N  
ATOM    564  CA  LYS A  65      15.910  67.483  41.417  1.00 18.20      1tnf C  
ATOM    565  C   LYS A  65      16.097  68.740  40.607  1.00 21.53      1tnf C  
ATOM    566  O   LYS A  65      17.202  69.179  40.285  1.00 21.80      1tnf O  
ATOM    567  CB  LYS A  65      15.673  67.814  42.904  1.00 16.46      1tnf C  
ATOM    568  CG  LYS A  65      15.964  69.208  43.446  1.00 16.99      1tnf C  
ATOM    569  CD  LYS A  65      17.462  69.634  43.405  1.00 23.91      1tnf C  
ATOM    570  CE  LYS A  65      17.711  71.155  43.622  1.00 26.95      1tnf C  
ATOM    571  NZ  LYS A  65      18.351  71.362  44.916  1.00 31.59      1tnf N1+
ATOM    572  HN  LYS A  65      18.041  67.355  41.332  1.00  0.00      1tnf H  
ATOM    573  HZ1 LYS A  65      18.514  72.359  45.058  1.00  0.00      1tnf H  
ATOM    574  HZ2 LYS A  65      19.205  70.813  45.016  1.00  0.00      1tnf H  
ATOM    575  HZ3 LYS A  65      17.820  70.945  45.680  1.00  0.00      1tnf H  
ATOM    576  N   GLY A  66      15.000  69.359  40.318  1.00 25.99      1tnf N  
ATOM    577  CA  GLY A  66      14.927  70.613  39.609  1.00 28.23      1tnf C  
ATOM    578  C   GLY A  66      13.456  70.968  39.743  1.00 30.38      1tnf C  
ATOM    579  O   GLY A  66      12.640  70.176  40.268  1.00 25.49      1tnf O  
ATOM    580  HN  GLY A  66      14.123  68.930  40.612  1.00  0.00      1tnf H  
ATOM    581  N   GLN A  67      13.087  72.166  39.326  1.00 31.64      1tnf N  
ATOM    582  CA  GLN A  67      11.708  72.597  39.468  1.00 35.19      1tnf C  
ATOM    583  C   GLN A  67      11.482  73.261  38.136  1.00 35.97      1tnf C  
ATOM    584  O   GLN A  67      12.094  74.310  37.913  1.00 38.06      1tnf O  
ATOM    585  CB  GLN A  67      11.629  73.567  40.603  1.00 33.52      1tnf C  
ATOM    586  CG  GLN A  67      10.291  73.535  41.247  1.00 33.62      1tnf C  
ATOM    587  CD  GLN A  67      10.094  74.816  42.030  1.00 36.03      1tnf C  
ATOM    588  NE2 GLN A  67       8.892  75.128  42.488  1.00 38.44      1tnf N  
ATOM    589  OE1 GLN A  67      11.011  75.610  42.205  1.00 36.50      1tnf O  
ATOM    590  HN  GLN A  67      13.774  72.790  38.903  1.00  0.00      1tnf H  
ATOM    591 1HE2 GLN A  67       8.759  75.991  43.015  1.00  0.00      1tnf H  
ATOM    592 2HE2 GLN A  67       8.129  74.467  42.342  1.00  0.00      1tnf H  
ATOM    593  N   GLY A  68      10.715  72.657  37.228  1.00 35.20      1tnf N  
ATOM    594  CA  GLY A  68      10.610  73.243  35.917  1.00 36.63      1tnf C  
ATOM    595  C   GLY A  68      11.881  72.990  35.081  1.00 38.01      1tnf C  
ATOM    596  O   GLY A  68      13.055  72.797  35.454  1.00 31.93      1tnf O  
ATOM    597  HN  GLY A  68      10.214  71.799  37.457  1.00  0.00      1tnf H  
ATOM    598  N   CYS A  69      11.505  72.986  33.832  1.00 41.94      1tnf N  
ATOM    599  CA  CYS A  69      12.430  72.603  32.811  1.00 45.94      1tnf C  
ATOM    600  C   CYS A  69      12.744  73.807  31.993  1.00 49.60      1tnf C  
ATOM    601  O   CYS A  69      11.815  74.449  31.490  1.00 48.80      1tnf O  
ATOM    602  CB  CYS A  69      11.760  71.512  32.054  1.00 46.17      1tnf C  
ATOM    603  SG  CYS A  69      12.139  70.139  33.164  1.00 48.93      1tnf S  
ATOM    604  HN  CYS A  69      10.553  73.256  33.584  1.00  0.00      1tnf H  
ATOM    605  N   PRO A  70      14.047  74.140  31.989  1.00 54.77      1tnf N  
ATOM    606  CA  PRO A  70      14.571  75.455  31.590  1.00 55.79      1tnf C  
ATOM    607  C   PRO A  70      14.790  75.429  30.078  1.00 57.27      1tnf C  
ATOM    608  O   PRO A  70      13.928  74.975  29.303  1.00 56.55      1tnf O  
ATOM    609  CB  PRO A  70      15.819  75.532  32.458  1.00 55.59      1tnf C  
ATOM    610  CG  PRO A  70      16.408  74.125  32.321  1.00 55.73      1tnf C  
ATOM    611  CD  PRO A  70      15.145  73.224  32.381  1.00 54.85      1tnf C  
ATOM    612  N   SER A  71      15.996  75.772  29.624  1.00 59.64      1tnf N  
ATOM    613  CA  SER A  71      16.206  75.709  28.199  1.00 63.63      1tnf C  
ATOM    614  C   SER A  71      16.465  74.276  27.747  1.00 62.56      1tnf C  
ATOM    615  O   SER A  71      17.447  73.595  28.071  1.00 62.27      1tnf O  
ATOM    616  CB  SER A  71      17.388  76.532  27.738  1.00 65.64      1tnf C  
ATOM    617  OG  SER A  71      17.110  77.288  26.563  1.00 68.66      1tnf O  
ATOM    618  HN  SER A  71      16.739  76.067  30.258  1.00  0.00      1tnf H  
ATOM    619  HG  SER A  71      17.853  77.805  26.273  1.00  0.00      1tnf H  
ATOM    620  N   THR A  72      15.414  73.890  27.029  1.00 60.35      1tnf N  
ATOM    621  CA  THR A  72      15.349  72.720  26.196  1.00 55.31      1tnf C  
ATOM    622  C   THR A  72      16.168  71.477  26.587  1.00 49.81      1tnf C  
ATOM    623  O   THR A  72      15.488  70.476  26.844  1.00 47.07      1tnf O  
ATOM    624  CB  THR A  72      15.618  73.350  24.690  1.00 57.25      1tnf C  
ATOM    625  CG2 THR A  72      17.003  74.012  24.449  1.00 55.21      1tnf C  
ATOM    626  OG1 THR A  72      15.422  72.273  23.772  1.00 55.39      1tnf O  
ATOM    627  HN  THR A  72      14.580  74.476  27.073  1.00  0.00      1tnf H  
ATOM    628  HG1 THR A  72      15.576  72.635  22.907  1.00  0.00      1tnf H  
ATOM    629  N   HIS A  73      17.511  71.377  26.719  1.00 44.52      1tnf N  
ATOM    630  CA  HIS A  73      18.124  70.071  26.874  1.00 39.16      1tnf C  
ATOM    631  C   HIS A  73      19.279  69.790  27.782  1.00 35.80      1tnf C  
ATOM    632  O   HIS A  73      20.433  69.819  27.378  1.00 33.67      1tnf O  
ATOM    633  CB  HIS A  73      18.483  69.562  25.495  1.00 41.23      1tnf C  
ATOM    634  CG  HIS A  73      17.651  68.295  25.458  1.00 45.07      1tnf C  
ATOM    635  CD2 HIS A  73      18.165  67.025  25.385  1.00 46.59      1tnf C  
ATOM    636  ND1 HIS A  73      16.322  68.197  25.615  1.00 44.73      1tnf N  
ATOM    637  CE1 HIS A  73      16.009  66.926  25.658  1.00 46.15      1tnf C  
ATOM    638  NE2 HIS A  73      17.125  66.247  25.520  1.00 48.01      1tnf N  
ATOM    639  HN  HIS A  73      18.090  72.217  26.710  1.00  0.00      1tnf H  
ATOM    640  HD1 HIS A  73      15.669  68.977  25.688  1.00  0.00      1tnf H  
ATOM    641  HE2 HIS A  73      17.174  65.228  25.518  1.00  0.00      1tnf H  
ATOM    642  N   VAL A  74      18.849  69.290  28.951  1.00 34.01      1tnf N  
ATOM    643  CA  VAL A  74      19.764  69.137  30.077  1.00 33.36      1tnf C  
ATOM    644  C   VAL A  74      20.801  68.019  30.123  1.00 32.20      1tnf C  
ATOM    645  O   VAL A  74      21.986  68.361  30.220  1.00 35.39      1tnf O  
ATOM    646  CB  VAL A  74      18.980  69.044  31.424  1.00 33.30      1tnf C  
ATOM    647  CG1 VAL A  74      19.947  69.310  32.574  1.00 35.43      1tnf C  
ATOM    648  CG2 VAL A  74      17.973  70.162  31.593  1.00 35.86      1tnf C  
ATOM    649  HN  VAL A  74      17.872  69.014  29.053  1.00  0.00      1tnf H  
ATOM    650  N   LEU A  75      20.462  66.725  30.042  1.00 25.51      1tnf N  
ATOM    651  CA  LEU A  75      21.457  65.647  30.270  1.00 20.46      1tnf C  
ATOM    652  C   LEU A  75      22.214  65.694  31.623  1.00 15.34      1tnf C  
ATOM    653  O   LEU A  75      23.077  66.524  31.933  1.00 10.19      1tnf O  
ATOM    654  CB  LEU A  75      22.573  65.558  29.154  1.00 16.70      1tnf C  
ATOM    655  CG  LEU A  75      22.273  65.420  27.647  1.00 18.67      1tnf C  
ATOM    656  CD1 LEU A  75      20.975  64.642  27.389  1.00 15.84      1tnf C  
ATOM    657  CD2 LEU A  75      22.146  66.825  27.051  1.00 19.44      1tnf C  
ATOM    658  HN  LEU A  75      19.499  66.475  29.819  1.00  0.00      1tnf H  
ATOM    659  N   LEU A  76      21.730  64.788  32.468  1.00 11.41      1tnf N  
ATOM    660  CA  LEU A  76      22.352  64.467  33.744  1.00 10.70      1tnf C  
ATOM    661  C   LEU A  76      23.190  63.229  33.431  1.00 11.79      1tnf C  
ATOM    662  O   LEU A  76      22.774  62.354  32.667  1.00 14.65      1tnf O  
ATOM    663  CB  LEU A  76      21.311  64.121  34.836  1.00  6.18      1tnf C  
ATOM    664  CG  LEU A  76      20.247  65.061  35.525  1.00  4.20      1tnf C  
ATOM    665  CD1 LEU A  76      20.550  66.497  35.277  1.00  2.00      1tnf C  
ATOM    666  CD2 LEU A  76      18.863  64.834  34.987  1.00  2.00      1tnf C  
ATOM    667  HN  LEU A  76      20.878  64.292  32.208  1.00  0.00      1tnf H  
ATOM    668  N   THR A  77      24.412  63.118  33.920  1.00 13.76      1tnf N  
ATOM    669  CA  THR A  77      25.239  61.976  33.642  1.00 11.45      1tnf C  
ATOM    670  C   THR A  77      25.719  61.496  34.973  1.00 11.20      1tnf C  
ATOM    671  O   THR A  77      25.963  62.300  35.896  1.00 11.52      1tnf O  
ATOM    672  CB  THR A  77      26.496  62.309  32.753  1.00 13.94      1tnf C  
ATOM    673  CG2 THR A  77      25.972  62.904  31.454  1.00 12.98      1tnf C  
ATOM    674  OG1 THR A  77      27.451  63.169  33.411  1.00 11.65      1tnf O  
ATOM    675  HN  THR A  77      24.779  63.864  34.511  1.00  0.00      1tnf H  
ATOM    676  HG1 THR A  77      28.209  63.370  32.875  1.00  0.00      1tnf H  
ATOM    677  N   HIS A  78      25.848  60.177  35.068  1.00 11.90      1tnf N  
ATOM    678  CA  HIS A  78      26.484  59.624  36.241  1.00 11.02      1tnf C  
ATOM    679  C   HIS A  78      27.573  58.591  35.942  1.00 12.93      1tnf C  
ATOM    680  O   HIS A  78      27.186  57.451  35.678  1.00 18.10      1tnf O  
ATOM    681  CB  HIS A  78      25.402  59.041  37.109  1.00  9.20      1tnf C  
ATOM    682  CG  HIS A  78      26.022  58.645  38.431  1.00 13.92      1tnf C  
ATOM    683  CD2 HIS A  78      27.052  59.340  39.062  1.00 14.49      1tnf C  
ATOM    684  ND1 HIS A  78      25.722  57.562  39.138  1.00 15.11      1tnf N  
ATOM    685  CE1 HIS A  78      26.538  57.592  40.172  1.00 19.21      1tnf C  
ATOM    686  NE2 HIS A  78      27.335  58.653  40.121  1.00 17.67      1tnf N  
ATOM    687  HN  HIS A  78      25.504  59.567  34.327  1.00  0.00      1tnf H  
ATOM    688  HD1 HIS A  78      25.014  56.859  38.927  1.00  0.00      1tnf H  
ATOM    689  HE2 HIS A  78      28.054  58.888  40.806  1.00  0.00      1tnf H  
ATOM    690  N   THR A  79      28.888  58.864  36.071  1.00 13.22      1tnf N  
ATOM    691  CA  THR A  79      29.915  57.936  35.603  1.00 11.06      1tnf C  
ATOM    692  C   THR A  79      30.829  57.479  36.718  1.00 14.04      1tnf C  
ATOM    693  O   THR A  79      31.297  58.373  37.419  1.00 17.80      1tnf O  
ATOM    694  CB  THR A  79      30.817  58.608  34.483  1.00 13.16      1tnf C  
ATOM    695  CG2 THR A  79      31.760  57.664  33.805  1.00  8.88      1tnf C  
ATOM    696  OG1 THR A  79      29.985  59.063  33.423  1.00 17.66      1tnf O  
ATOM    697  HN  THR A  79      29.173  59.741  36.507  1.00  0.00      1tnf H  
ATOM    698  HG1 THR A  79      30.525  59.465  32.753  1.00  0.00      1tnf H  
ATOM    699  N   ILE A  80      31.074  56.170  36.945  1.00 14.02      1tnf N  
ATOM    700  CA  ILE A  80      32.130  55.708  37.849  1.00 11.76      1tnf C  
ATOM    701  C   ILE A  80      33.293  55.324  36.906  1.00 12.31      1tnf C  
ATOM    702  O   ILE A  80      33.093  54.584  35.939  1.00 16.09      1tnf O  
ATOM    703  CB  ILE A  80      31.694  54.468  38.709  1.00 12.43      1tnf C  
ATOM    704  CG1 ILE A  80      30.437  54.726  39.557  1.00 14.44      1tnf C  
ATOM    705  CG2 ILE A  80      32.842  54.188  39.682  1.00 12.53      1tnf C  
ATOM    706  CD1 ILE A  80      30.000  53.581  40.515  1.00 13.74      1tnf C  
ATOM    707  HN  ILE A  80      30.500  55.475  36.467  1.00  0.00      1tnf H  
ATOM    708  N   SER A  81      34.510  55.768  37.133  1.00 10.12      1tnf N  
ATOM    709  CA  SER A  81      35.691  55.615  36.282  1.00 11.10      1tnf C  
ATOM    710  C   SER A  81      36.817  55.005  37.119  1.00 14.45      1tnf C  
ATOM    711  O   SER A  81      36.818  55.064  38.369  1.00 16.93      1tnf O  
ATOM    712  CB  SER A  81      36.310  56.934  35.780  1.00 12.70      1tnf C  
ATOM    713  OG  SER A  81      35.591  57.972  35.094  1.00 17.58      1tnf O  
ATOM    714  HN  SER A  81      34.647  56.279  38.005  1.00  0.00      1tnf H  
ATOM    715  HG  SER A  81      35.973  58.785  34.785  1.00  0.00      1tnf H  
ATOM    716  N   ARG A  82      37.821  54.486  36.426  1.00  8.75      1tnf N  
ATOM    717  CA  ARG A  82      38.947  53.896  37.088  1.00  7.35      1tnf C  
ATOM    718  C   ARG A  82      40.208  54.528  36.604  1.00  8.89      1tnf C  
ATOM    719  O   ARG A  82      40.491  54.420  35.411  1.00 16.26      1tnf O  
ATOM    720  CB  ARG A  82      38.994  52.392  36.807  1.00 10.87      1tnf C  
ATOM    721  CG  ARG A  82      40.332  51.788  37.102  1.00  8.57      1tnf C  
ATOM    722  CD  ARG A  82      40.047  50.654  37.961  1.00 10.68      1tnf C  
ATOM    723  NE  ARG A  82      39.796  49.539  37.124  1.00 14.67      1tnf N  
ATOM    724  CZ  ARG A  82      40.735  48.624  36.866  1.00 17.91      1tnf C  
ATOM    725  NH1 ARG A  82      40.383  47.633  36.046  1.00 21.38      1tnf N1+
ATOM    726  NH2 ARG A  82      41.956  48.625  37.412  1.00 14.93      1tnf N  
ATOM    727  HN  ARG A  82      37.792  54.507  35.407  1.00  0.00      1tnf H  
ATOM    728  HE  ARG A  82      38.872  49.432  36.706  1.00  0.00      1tnf H  
ATOM    729 1HH1 ARG A  82      41.100  46.935  35.849  1.00  0.00      1tnf H  
ATOM    730 2HH1 ARG A  82      39.452  47.632  35.630  1.00  0.00      1tnf H  
ATOM    731 1HH2 ARG A  82      42.673  47.927  37.215  1.00  0.00      1tnf H  
ATOM    732 2HH2 ARG A  82      42.225  49.383  38.039  1.00  0.00      1tnf H  
ATOM    733  N   ILE A  83      40.977  55.198  37.436  1.00  9.64      1tnf N  
ATOM    734  CA  ILE A  83      42.256  55.609  36.931  1.00 12.59      1tnf C  
ATOM    735  C   ILE A  83      43.244  54.603  37.558  1.00 15.71      1tnf C  
ATOM    736  O   ILE A  83      43.632  54.648  38.722  1.00 16.09      1tnf O  
ATOM    737  CB  ILE A  83      42.399  57.176  37.233  1.00 14.11      1tnf C  
ATOM    738  CG1 ILE A  83      43.912  57.439  37.177  1.00 16.58      1tnf C  
ATOM    739  CG2 ILE A  83      41.622  57.664  38.435  1.00 10.57      1tnf C  
ATOM    740  CD1 ILE A  83      44.432  58.707  36.422  1.00 15.05      1tnf C  
ATOM    741  HN  ILE A  83      40.680  55.413  38.388  1.00  0.00      1tnf H  
ATOM    742  N   ALA A  84      43.456  53.542  36.732  1.00 21.22      1tnf N  
ATOM    743  CA  ALA A  84      44.187  52.293  37.071  1.00 22.61      1tnf C  
ATOM    744  C   ALA A  84      45.715  52.271  37.182  1.00 22.03      1tnf C  
ATOM    745  O   ALA A  84      46.462  52.965  36.482  1.00 22.71      1tnf O  
ATOM    746  CB  ALA A  84      43.888  51.149  36.093  1.00 18.10      1tnf C  
ATOM    747  HN  ALA A  84      43.076  53.611  35.788  1.00  0.00      1tnf H  
ATOM    748  N   VAL A  85      46.218  51.398  38.035  1.00 20.35      1tnf N  
ATOM    749  CA  VAL A  85      47.641  51.376  38.255  1.00 16.08      1tnf C  
ATOM    750  C   VAL A  85      48.527  50.872  37.120  1.00 17.42      1tnf C  
ATOM    751  O   VAL A  85      49.741  50.907  37.261  1.00 22.66      1tnf O  
ATOM    752  CB  VAL A  85      47.807  50.617  39.514  1.00 12.69      1tnf C  
ATOM    753  CG1 VAL A  85      48.237  49.146  39.352  1.00 14.97      1tnf C  
ATOM    754  CG2 VAL A  85      48.660  51.574  40.271  1.00  8.74      1tnf C  
ATOM    755  HN  VAL A  85      45.608  50.749  38.531  1.00  0.00      1tnf H  
ATOM    756  N   SER A  86      48.012  50.414  35.988  1.00 16.93      1tnf N  
ATOM    757  CA  SER A  86      48.814  50.004  34.851  1.00 15.40      1tnf C  
ATOM    758  C   SER A  86      48.309  50.862  33.720  1.00 17.41      1tnf C  
ATOM    759  O   SER A  86      49.083  51.659  33.210  1.00 22.86      1tnf O  
ATOM    760  CB  SER A  86      48.579  48.538  34.624  1.00 14.37      1tnf C  
ATOM    761  OG  SER A  86      47.173  48.314  34.678  1.00 18.06      1tnf O  
ATOM    762  HN  SER A  86      46.997  50.346  35.912  1.00  0.00      1tnf H  
ATOM    763  HG  SER A  86      47.024  47.387  34.534  1.00  0.00      1tnf H  
ATOM    764  N   TYR A  87      47.043  50.832  33.292  1.00 17.82      1tnf N  
ATOM    765  CA  TYR A  87      46.585  51.775  32.272  1.00 19.08      1tnf C  
ATOM    766  C   TYR A  87      46.276  53.032  33.097  1.00 16.85      1tnf C  
ATOM    767  O   TYR A  87      45.147  53.352  33.463  1.00 17.82      1tnf O  
ATOM    768  CB  TYR A  87      45.275  51.340  31.433  1.00 23.98      1tnf C  
ATOM    769  CG  TYR A  87      44.368  50.096  31.709  1.00 31.39      1tnf C  
ATOM    770  CD1 TYR A  87      43.406  49.648  30.767  1.00 30.44      1tnf C  
ATOM    771  CD2 TYR A  87      44.515  49.352  32.876  1.00 32.60      1tnf C  
ATOM    772  CE1 TYR A  87      42.640  48.506  31.000  1.00 29.64      1tnf C  
ATOM    773  CE2 TYR A  87      43.767  48.225  33.106  1.00 32.41      1tnf C  
ATOM    774  CZ  TYR A  87      42.839  47.795  32.193  1.00 32.33      1tnf C  
ATOM    775  OH  TYR A  87      42.199  46.596  32.529  1.00 32.41      1tnf O  
ATOM    776  HN  TYR A  87      46.393  50.148  33.679  1.00  0.00      1tnf H  
ATOM    777  HH  TYR A  87      42.334  46.115  33.337  1.00  0.00      1tnf H  
ATOM    778  N   GLN A  88      47.312  53.782  33.458  1.00 16.07      1tnf N  
ATOM    779  CA  GLN A  88      47.144  54.955  34.310  1.00 16.48      1tnf C  
ATOM    780  C   GLN A  88      46.557  56.143  33.560  1.00 15.18      1tnf C  
ATOM    781  O   GLN A  88      47.226  56.968  32.908  1.00 10.42      1tnf O  
ATOM    782  CB  GLN A  88      48.492  55.275  34.896  1.00 16.75      1tnf C  
ATOM    783  CG  GLN A  88      48.250  55.897  36.256  1.00 18.22      1tnf C  
ATOM    784  CD  GLN A  88      49.451  56.619  36.864  1.00 16.91      1tnf C  
ATOM    785  NE2 GLN A  88      50.649  56.575  36.316  1.00 15.19      1tnf N  
ATOM    786  OE1 GLN A  88      49.311  57.290  37.877  1.00 16.72      1tnf O  
ATOM    787  HN  GLN A  88      48.246  53.532  33.132  1.00  0.00      1tnf H  
ATOM    788 1HE2 GLN A  88      51.451  57.057  36.722  1.00  0.00      1tnf H  
ATOM    789 2HE2 GLN A  88      50.766  56.015  35.471  1.00  0.00      1tnf H  
ATOM    790  N   THR A  89      45.241  56.084  33.631  1.00 14.13      1tnf N  
ATOM    791  CA  THR A  89      44.385  57.019  32.968  1.00 13.34      1tnf C  
ATOM    792  C   THR A  89      42.952  56.694  33.410  1.00 13.39      1tnf C  
ATOM    793  O   THR A  89      42.663  55.561  33.821  1.00 14.38      1tnf O  
ATOM    794  CB  THR A  89      44.571  56.844  31.448  1.00 12.80      1tnf C  
ATOM    795  CG2 THR A  89      43.935  55.611  30.816  1.00 10.33      1tnf C  
ATOM    796  OG1 THR A  89      43.986  58.010  30.907  1.00 17.79      1tnf O  
ATOM    797  HN  THR A  89      44.815  55.339  34.183  1.00  0.00      1tnf H  
ATOM    798  HG1 THR A  89      44.101  57.902  29.970  1.00  0.00      1tnf H  
ATOM    799  N   LYS A  90      42.039  57.655  33.250  1.00 10.53      1tnf N  
ATOM    800  CA  LYS A  90      40.681  57.466  33.722  1.00 12.15      1tnf C  
ATOM    801  C   LYS A  90      39.834  56.597  32.784  1.00 10.37      1tnf C  
ATOM    802  O   LYS A  90      39.169  57.126  31.916  1.00  8.16      1tnf O  
ATOM    803  CB  LYS A  90      40.104  58.922  33.970  1.00 14.76      1tnf C  
ATOM    804  CG  LYS A  90      38.822  59.009  34.817  1.00 13.21      1tnf C  
ATOM    805  CD  LYS A  90      38.743  60.005  35.980  1.00 12.07      1tnf C  
ATOM    806  CE  LYS A  90      38.534  61.526  35.657  1.00 16.46      1tnf C  
ATOM    807  NZ  LYS A  90      37.219  61.933  35.158  1.00 16.67      1tnf N1+
ATOM    808  HN  LYS A  90      42.299  58.529  32.792  1.00  0.00      1tnf H  
ATOM    809  HZ1 LYS A  90      37.083  62.922  34.948  1.00  0.00      1tnf H  
ATOM    810  HZ2 LYS A  90      36.499  61.624  35.811  1.00  0.00      1tnf H  
ATOM    811  HZ3 LYS A  90      36.982  61.377  34.336  1.00  0.00      1tnf H  
ATOM    812  N   VAL A  91      39.805  55.266  32.849  1.00  8.51      1tnf N  
ATOM    813  CA  VAL A  91      38.949  54.538  31.933  1.00  7.20      1tnf C  
ATOM    814  C   VAL A  91      37.549  54.537  32.503  1.00  9.58      1tnf C  
ATOM    815  O   VAL A  91      37.389  54.999  33.622  1.00 13.50      1tnf O  
ATOM    816  CB  VAL A  91      39.567  53.154  31.735  1.00  6.37      1tnf C  
ATOM    817  CG1 VAL A  91      38.815  52.178  30.884  1.00  3.12      1tnf C  
ATOM    818  CG2 VAL A  91      40.820  53.442  30.962  1.00  8.49      1tnf C  
ATOM    819  HN  VAL A  91      40.376  54.768  33.532  1.00  0.00      1tnf H  
ATOM    820  N   ASN A  92      36.498  54.016  31.897  1.00 11.71      1tnf N  
ATOM    821  CA  ASN A  92      35.137  54.312  32.331  1.00 12.59      1tnf C  
ATOM    822  C   ASN A  92      34.364  53.055  32.732  1.00 11.27      1tnf C  
ATOM    823  O   ASN A  92      34.160  52.142  31.953  1.00 11.82      1tnf O  
ATOM    824  CB  ASN A  92      34.561  55.080  31.132  1.00 14.02      1tnf C  
ATOM    825  CG  ASN A  92      33.358  55.953  31.374  1.00 13.85      1tnf C  
ATOM    826  ND2 ASN A  92      32.127  55.448  31.430  1.00 16.40      1tnf N  
ATOM    827  OD1 ASN A  92      33.501  57.162  31.535  1.00 16.18      1tnf O  
ATOM    828  HN  ASN A  92      36.641  53.390  31.105  1.00  0.00      1tnf H  
ATOM    829 1HD2 ASN A  92      32.008  54.444  31.296  1.00  0.00      1tnf H  
ATOM    830 2HD2 ASN A  92      31.312  56.039  31.594  1.00  0.00      1tnf H  
ATOM    831  N   LEU A  93      33.889  52.943  33.940  1.00 14.21      1tnf N  
ATOM    832  CA  LEU A  93      33.291  51.695  34.413  1.00 15.17      1tnf C  
ATOM    833  C   LEU A  93      31.784  51.445  34.360  1.00 12.41      1tnf C  
ATOM    834  O   LEU A  93      31.321  50.363  33.992  1.00 10.14      1tnf O  
ATOM    835  CB  LEU A  93      33.826  51.470  35.844  1.00 14.17      1tnf C  
ATOM    836  CG  LEU A  93      35.313  51.076  35.777  1.00 15.94      1tnf C  
ATOM    837  CD1 LEU A  93      35.915  50.851  37.138  1.00 12.80      1tnf C  
ATOM    838  CD2 LEU A  93      35.413  49.799  34.976  1.00  9.84      1tnf C  
ATOM    839  HN  LEU A  93      33.935  53.744  34.570  1.00  0.00      1tnf H  
ATOM    840  N   LEU A  94      31.006  52.455  34.726  1.00  8.92      1tnf N  
ATOM    841  CA  LEU A  94      29.572  52.385  34.714  1.00  8.28      1tnf C  
ATOM    842  C   LEU A  94      29.237  53.831  34.365  1.00 11.00      1tnf C  
ATOM    843  O   LEU A  94      30.020  54.755  34.668  1.00 14.39      1tnf O  
ATOM    844  CB  LEU A  94      29.104  51.916  36.115  1.00  5.85      1tnf C  
ATOM    845  CG  LEU A  94      29.555  50.543  36.690  1.00  5.32      1tnf C  
ATOM    846  CD1 LEU A  94      29.572  50.532  38.220  1.00  5.10      1tnf C  
ATOM    847  CD2 LEU A  94      28.658  49.489  36.199  1.00  2.67      1tnf C  
ATOM    848  HN  LEU A  94      31.447  53.323  35.030  1.00  0.00      1tnf H  
ATOM    849  N   SER A  95      28.118  54.072  33.703  1.00  9.28      1tnf N  
ATOM    850  CA  SER A  95      27.744  55.399  33.269  1.00  9.93      1tnf C  
ATOM    851  C   SER A  95      26.267  55.355  32.894  1.00  6.67      1tnf C  
ATOM    852  O   SER A  95      25.714  54.325  32.508  1.00  5.70      1tnf O  
ATOM    853  CB  SER A  95      28.603  55.794  32.069  1.00 10.67      1tnf C  
ATOM    854  OG  SER A  95      28.521  57.153  31.705  1.00 17.33      1tnf O  
ATOM    855  HN  SER A  95      27.496  53.292  33.491  1.00  0.00      1tnf H  
ATOM    856  HG  SER A  95      29.055  57.399  30.959  1.00  0.00      1tnf H  
ATOM    857  N   ALA A  96      25.565  56.457  33.080  1.00  7.57      1tnf N  
ATOM    858  CA  ALA A  96      24.163  56.506  32.664  1.00  9.68      1tnf C  
ATOM    859  C   ALA A  96      23.888  57.946  32.311  1.00  9.20      1tnf C  
ATOM    860  O   ALA A  96      24.537  58.849  32.879  1.00 13.95      1tnf O  
ATOM    861  CB  ALA A  96      23.229  56.092  33.794  1.00  7.16      1tnf C  
ATOM    862  HN  ALA A  96      25.999  57.273  33.513  1.00  0.00      1tnf H  
ATOM    863  N   ILE A  97      23.080  58.195  31.286  1.00 10.59      1tnf N  
ATOM    864  CA  ILE A  97      22.695  59.572  31.032  1.00 12.05      1tnf C  
ATOM    865  C   ILE A  97      21.183  59.568  31.243  1.00  9.44      1tnf C  
ATOM    866  O   ILE A  97      20.505  58.529  31.141  1.00  9.07      1tnf O  
ATOM    867  CB  ILE A  97      23.105  60.069  29.590  1.00 10.90      1tnf C  
ATOM    868  CG1 ILE A  97      24.481  59.560  29.145  1.00  8.16      1tnf C  
ATOM    869  CG2 ILE A  97      23.204  61.618  29.664  1.00  8.93      1tnf C  
ATOM    870  CD1 ILE A  97      25.180  60.368  28.048  1.00  8.02      1tnf C  
ATOM    871  HN  ILE A  97      22.739  57.438  30.693  1.00  0.00      1tnf H  
ATOM    872  N   LYS A  98      20.651  60.693  31.653  1.00  7.90      1tnf N  
ATOM    873  CA  LYS A  98      19.251  60.715  32.009  1.00 15.14      1tnf C  
ATOM    874  C   LYS A  98      18.671  62.009  31.484  1.00 16.36      1tnf C  
ATOM    875  O   LYS A  98      19.250  63.086  31.666  1.00 14.21      1tnf O  
ATOM    876  CB  LYS A  98      19.091  60.643  33.537  1.00 14.43      1tnf C  
ATOM    877  CG  LYS A  98      17.692  60.297  33.963  1.00 15.78      1tnf C  
ATOM    878  CD  LYS A  98      17.428  58.787  33.964  1.00 15.99      1tnf C  
ATOM    879  CE  LYS A  98      16.194  58.311  34.806  1.00 16.30      1tnf C  
ATOM    880  NZ  LYS A  98      16.314  58.354  36.264  1.00 11.50      1tnf N1+
ATOM    881  HN  LYS A  98      21.216  61.540  31.720  1.00  0.00      1tnf H  
ATOM    882  HZ1 LYS A  98      15.511  58.044  36.812  1.00  0.00      1tnf H  
ATOM    883  HZ2 LYS A  98      16.576  59.296  36.553  1.00  0.00      1tnf H  
ATOM    884  HZ3 LYS A  98      17.140  57.829  36.550  1.00  0.00      1tnf H  
ATOM    885  N   SER A  99      17.557  61.932  30.769  1.00 20.87      1tnf N  
ATOM    886  CA  SER A  99      16.989  63.174  30.274  1.00 26.46      1tnf C  
ATOM    887  C   SER A  99      15.958  63.432  31.338  1.00 27.39      1tnf C  
ATOM    888  O   SER A  99      15.141  62.527  31.589  1.00 29.51      1tnf O  
ATOM    889  CB  SER A  99      16.275  63.065  28.892  1.00 29.18      1tnf C  
ATOM    890  OG  SER A  99      15.005  62.394  28.740  1.00 34.35      1tnf O  
ATOM    891  HN  SER A  99      17.115  61.034  30.574  1.00  0.00      1tnf H  
ATOM    892  HG  SER A  99      14.570  62.328  27.898  1.00  0.00      1tnf H  
ATOM    893  N   PRO A 100      16.001  64.593  32.001  1.00 24.85      1tnf N  
ATOM    894  CA  PRO A 100      14.959  64.992  32.938  1.00 26.16      1tnf C  
ATOM    895  C   PRO A 100      13.695  65.275  32.138  1.00 26.83      1tnf C  
ATOM    896  O   PRO A 100      13.125  64.362  31.543  1.00 30.31      1tnf O  
ATOM    897  CB  PRO A 100      15.569  66.178  33.654  1.00 22.56      1tnf C  
ATOM    898  CG  PRO A 100      16.450  66.774  32.600  1.00 22.91      1tnf C  
ATOM    899  CD  PRO A 100      17.047  65.584  31.872  1.00 23.37      1tnf C  
ATOM    900  N   CYS A 101      13.245  66.502  32.026  1.00 26.06      1tnf N  
ATOM    901  CA  CYS A 101      12.076  66.782  31.234  1.00 31.15      1tnf C  
ATOM    902  C   CYS A 101      12.346  66.843  29.726  1.00 30.89      1tnf C  
ATOM    903  O   CYS A 101      13.351  67.345  29.206  1.00 29.63      1tnf O  
ATOM    904  CB  CYS A 101      11.555  68.061  31.691  1.00 35.98      1tnf C  
ATOM    905  SG  CYS A 101      13.037  69.110  31.716  1.00 40.84      1tnf S  
ATOM    906  HN  CYS A 101      13.727  67.263  32.504  1.00  0.00      1tnf H  
ATOM    907  N   GLN A 102      11.407  66.268  29.018  1.00 31.44      1tnf N  
ATOM    908  CA  GLN A 102      11.365  66.265  27.581  1.00 36.75      1tnf C  
ATOM    909  C   GLN A 102      10.285  67.334  27.557  1.00 39.55      1tnf C  
ATOM    910  O   GLN A 102       9.124  66.999  27.787  1.00 39.22      1tnf O  
ATOM    911  CB  GLN A 102      10.891  64.881  27.173  1.00 37.59      1tnf C  
ATOM    912  CG  GLN A 102      10.423  64.548  25.756  1.00 41.52      1tnf C  
ATOM    913  CD  GLN A 102      11.501  64.103  24.772  1.00 43.97      1tnf C  
ATOM    914  NE2 GLN A 102      12.479  63.288  25.156  1.00 47.11      1tnf N  
ATOM    915  OE1 GLN A 102      11.507  64.503  23.608  1.00 45.39      1tnf O  
ATOM    916  HN  GLN A 102      10.657  65.791  29.518  1.00  0.00      1tnf H  
ATOM    917 1HE2 GLN A 102      12.474  62.957  26.121  1.00  0.00      1tnf H  
ATOM    918 2HE2 GLN A 102      13.200  62.991  24.498  1.00  0.00      1tnf H  
ATOM    919  N   ARG A 103      10.714  68.600  27.465  1.00 42.96      1tnf N  
ATOM    920  CA  ARG A 103       9.886  69.824  27.429  1.00 44.21      1tnf C  
ATOM    921  C   ARG A 103       8.947  70.132  28.602  1.00 45.47      1tnf C  
ATOM    922  O   ARG A 103       8.905  69.462  29.641  1.00 43.91      1tnf O  
ATOM    923  CB  ARG A 103       9.060  69.846  26.115  1.00 46.24      1tnf C  
ATOM    924  CG  ARG A 103       9.745  70.574  24.934  1.00 47.34      1tnf C  
ATOM    925  CD  ARG A 103       8.982  70.462  23.599  1.00 46.46      1tnf C  
ATOM    926  NE  ARG A 103       9.756  71.035  22.491  1.00 49.95      1tnf N  
ATOM    927  CZ  ARG A 103       9.599  70.739  21.176  1.00 48.95      1tnf C  
ATOM    928  NH1 ARG A 103      10.392  71.369  20.301  1.00 46.53      1tnf N1+
ATOM    929  NH2 ARG A 103       8.702  69.846  20.710  1.00 47.01      1tnf N  
ATOM    930  HN  ARG A 103      11.724  68.734  27.414  1.00  0.00      1tnf H  
ATOM    931  HE  ARG A 103      10.476  71.716  22.731  1.00  0.00      1tnf H  
ATOM    932 1HH1 ARG A 103      11.070  72.044  20.653  1.00  0.00      1tnf H  
ATOM    933 2HH1 ARG A 103      10.274  71.147  19.313  1.00  0.00      1tnf H  
ATOM    934 1HH2 ARG A 103       8.098  69.366  21.377  1.00  0.00      1tnf H  
ATOM    935 2HH2 ARG A 103       8.584  69.624  19.722  1.00  0.00      1tnf H  
ATOM    936  N   GLU A 104       8.411  71.347  28.458  1.00 51.33      1tnf N  
ATOM    937  CA  GLU A 104       7.350  72.032  29.240  1.00 55.09      1tnf C  
ATOM    938  C   GLU A 104       7.869  73.467  29.225  1.00 55.42      1tnf C  
ATOM    939  O   GLU A 104       7.146  74.302  28.687  1.00 58.83      1tnf O  
ATOM    940  CB  GLU A 104       7.158  71.610  30.766  1.00 56.79      1tnf C  
ATOM    941  CG  GLU A 104       5.881  72.091  31.542  1.00 55.36      1tnf C  
ATOM    942  CD  GLU A 104       4.548  71.288  31.542  1.00 56.00      1tnf C  
ATOM    943  OE1 GLU A 104       3.475  71.883  31.711  1.00 53.86      1tnf O  
ATOM    944  OE2 GLU A 104       4.560  70.066  31.403  1.00 55.80      1tnf O1-
ATOM    945  HN  GLU A 104       8.792  71.893  27.686  1.00  0.00      1tnf H  
ATOM    946  N   THR A 105       9.084  73.802  29.713  1.00 54.09      1tnf N  
ATOM    947  CA  THR A 105       9.663  75.155  29.611  1.00 54.66      1tnf C  
ATOM    948  C   THR A 105       8.826  76.341  30.167  1.00 56.92      1tnf C  
ATOM    949  O   THR A 105       8.664  77.426  29.586  1.00 56.87      1tnf O  
ATOM    950  CB  THR A 105      10.018  75.438  28.118  1.00 54.37      1tnf C  
ATOM    951  CG2 THR A 105      11.358  76.176  28.026  1.00 52.45      1tnf C  
ATOM    952  OG1 THR A 105      10.019  74.198  27.383  1.00 54.63      1tnf O  
ATOM    953  HN  THR A 105       9.632  73.078  30.178  1.00  0.00      1tnf H  
ATOM    954  HG1 THR A 105      10.235  74.370  26.474  1.00  0.00      1tnf H  
ATOM    955  N   PRO A 106       8.260  76.207  31.363  1.00 57.72      1tnf N  
ATOM    956  CA  PRO A 106       6.844  75.860  31.572  1.00 59.10      1tnf C  
ATOM    957  C   PRO A 106       5.756  76.957  31.533  1.00 60.28      1tnf C  
ATOM    958  O   PRO A 106       4.550  76.675  31.474  1.00 58.11      1tnf O  
ATOM    959  CB  PRO A 106       6.920  75.120  32.887  1.00 58.40      1tnf C  
ATOM    960  CG  PRO A 106       8.407  74.870  33.118  1.00 57.92      1tnf C  
ATOM    961  CD  PRO A 106       9.016  76.150  32.595  1.00 56.56      1tnf C  
ATOM    962  N   GLU A 107       6.230  78.212  31.605  1.00 61.59      1tnf N  
ATOM    963  CA  GLU A 107       5.506  79.486  31.578  1.00 62.94      1tnf C  
ATOM    964  C   GLU A 107       4.003  79.669  31.860  1.00 62.77      1tnf C  
ATOM    965  O   GLU A 107       3.652  80.756  32.324  1.00 63.36      1tnf O  
ATOM    966  CB  GLU A 107       5.840  80.146  30.218  1.00 64.78      1tnf C  
ATOM    967  CG  GLU A 107       5.600  81.663  30.238  1.00 69.51      1tnf C  
ATOM    968  CD  GLU A 107       6.166  82.500  29.084  1.00 73.36      1tnf C  
ATOM    969  OE1 GLU A 107       7.185  82.130  28.481  1.00 76.19      1tnf O  
ATOM    970  OE2 GLU A 107       5.589  83.555  28.798  1.00 74.82      1tnf O1-
ATOM    971  HN  GLU A 107       7.243  78.290  31.691  1.00  0.00      1tnf H  
ATOM    972  N   GLY A 108       3.043  78.774  31.596  1.00 62.68      1tnf N  
ATOM    973  CA  GLY A 108       1.646  78.976  32.005  1.00 61.43      1tnf C  
ATOM    974  C   GLY A 108       1.553  78.916  33.532  1.00 61.07      1tnf C  
ATOM    975  O   GLY A 108       0.889  79.724  34.186  1.00 59.42      1tnf O  
ATOM    976  HN  GLY A 108       3.290  77.922  31.093  1.00  0.00      1tnf H  
ATOM    977  N   ALA A 109       2.238  77.895  34.064  1.00 60.25      1tnf N  
ATOM    978  CA  ALA A 109       2.420  77.660  35.489  1.00 59.04      1tnf C  
ATOM    979  C   ALA A 109       3.810  77.049  35.445  1.00 57.41      1tnf C  
ATOM    980  O   ALA A 109       4.014  75.917  35.004  1.00 56.35      1tnf O  
ATOM    981  CB  ALA A 109       1.411  76.637  36.027  1.00 60.10      1tnf C  
ATOM    982  HN  ALA A 109       2.666  77.230  33.420  1.00  0.00      1tnf H  
ATOM    983  N   GLU A 110       4.785  77.858  35.830  1.00 57.09      1tnf N  
ATOM    984  CA  GLU A 110       6.197  77.478  35.662  1.00 57.21      1tnf C  
ATOM    985  C   GLU A 110       6.839  76.321  36.463  1.00 52.71      1tnf C  
ATOM    986  O   GLU A 110       6.828  75.169  36.037  1.00 49.55      1tnf O  
ATOM    987  CB  GLU A 110       7.013  78.798  35.838  1.00 58.92      1tnf C  
ATOM    988  CG  GLU A 110       8.555  78.878  35.815  1.00 60.51      1tnf C  
ATOM    989  CD  GLU A 110       9.080  80.059  36.679  1.00 62.01      1tnf C  
ATOM    990  OE1 GLU A 110       8.730  81.223  36.414  1.00 64.02      1tnf O  
ATOM    991  OE2 GLU A 110       9.823  79.819  37.638  1.00 60.40      1tnf O1-
ATOM    992  HN  GLU A 110       4.554  78.759  36.250  1.00  0.00      1tnf H  
ATOM    993  N   ALA A 111       7.370  76.521  37.661  1.00 49.80      1tnf N  
ATOM    994  CA  ALA A 111       8.248  75.508  38.196  1.00 47.29      1tnf C  
ATOM    995  C   ALA A 111       7.611  74.412  39.040  1.00 45.18      1tnf C  
ATOM    996  O   ALA A 111       7.563  74.462  40.268  1.00 43.21      1tnf O  
ATOM    997  CB  ALA A 111       9.352  76.237  38.968  1.00 45.91      1tnf C  
ATOM    998  HN  ALA A 111       7.164  77.368  38.191  1.00  0.00      1tnf H  
ATOM    999  N   LYS A 112       7.025  73.412  38.374  1.00 43.06      1tnf N  
ATOM   1000  CA  LYS A 112       6.628  72.220  39.093  1.00 38.58      1tnf C  
ATOM   1001  C   LYS A 112       7.869  71.301  39.182  1.00 36.20      1tnf C  
ATOM   1002  O   LYS A 112       8.749  71.304  38.302  1.00 34.87      1tnf O  
ATOM   1003  CB  LYS A 112       5.450  71.552  38.365  1.00 37.95      1tnf C  
ATOM   1004  CG  LYS A 112       5.586  71.207  36.903  1.00 37.98      1tnf C  
ATOM   1005  CD  LYS A 112       4.372  70.386  36.507  1.00 37.87      1tnf C  
ATOM   1006  CE  LYS A 112       4.646  68.967  36.958  1.00 38.91      1tnf C  
ATOM   1007  NZ  LYS A 112       3.422  68.190  36.993  1.00 41.30      1tnf N1+
ATOM   1008  HN  LYS A 112       6.859  73.488  37.370  1.00  0.00      1tnf H  
ATOM   1009  HZ1 LYS A 112       3.607  67.234  37.297  1.00  0.00      1tnf H  
ATOM   1010  HZ2 LYS A 112       2.935  68.213  36.097  1.00  0.00      1tnf H  
ATOM   1011  HZ3 LYS A 112       2.708  68.637  37.568  1.00  0.00      1tnf H  
ATOM   1012  N   PRO A 113       8.051  70.539  40.267  1.00 34.16      1tnf N  
ATOM   1013  CA  PRO A 113       9.349  69.936  40.605  1.00 30.49      1tnf C  
ATOM   1014  C   PRO A 113       9.634  68.662  39.811  1.00 28.35      1tnf C  
ATOM   1015  O   PRO A 113       8.651  67.987  39.451  1.00 31.95      1tnf O  
ATOM   1016  CB  PRO A 113       9.211  69.744  42.108  1.00 30.36      1tnf C  
ATOM   1017  CG  PRO A 113       7.733  69.419  42.352  1.00 28.41      1tnf C  
ATOM   1018  CD  PRO A 113       7.006  70.186  41.250  1.00 31.07      1tnf C  
ATOM   1019  N   TRP A 114      10.859  68.285  39.470  1.00 23.60      1tnf N  
ATOM   1020  CA  TRP A 114      11.119  66.989  38.871  1.00 21.42      1tnf C  
ATOM   1021  C   TRP A 114      12.229  66.352  39.725  1.00 21.49      1tnf C  
ATOM   1022  O   TRP A 114      13.029  67.066  40.345  1.00 21.11      1tnf O  
ATOM   1023  CB  TRP A 114      11.546  67.110  37.337  1.00 15.32      1tnf C  
ATOM   1024  CG  TRP A 114      12.687  68.007  36.858  1.00 13.31      1tnf C  
ATOM   1025  CD1 TRP A 114      12.405  69.226  36.285  1.00 13.16      1tnf C  
ATOM   1026  CD2 TRP A 114      14.041  67.787  36.993  1.00 11.07      1tnf C  
ATOM   1027  CE2 TRP A 114      14.562  68.953  36.490  1.00 11.66      1tnf C  
ATOM   1028  CE3 TRP A 114      14.883  66.803  37.455  1.00 11.15      1tnf C  
ATOM   1029  NE1 TRP A 114      13.571  69.781  36.082  1.00 13.41      1tnf N  
ATOM   1030  CZ2 TRP A 114      15.925  69.134  36.456  1.00 11.02      1tnf C  
ATOM   1031  CZ3 TRP A 114      16.235  66.975  37.424  1.00 10.51      1tnf C  
ATOM   1032  CH2 TRP A 114      16.748  68.140  36.928  1.00 10.82      1tnf C  
ATOM   1033  HN  TRP A 114      11.638  68.922  39.633  1.00  0.00      1tnf H  
ATOM   1034  HE1 TRP A 114      13.714  70.705  35.675  1.00  0.00      1tnf H  
ATOM   1035  N   TYR A 115      12.282  65.015  39.781  1.00 22.80      1tnf N  
ATOM   1036  CA  TYR A 115      13.290  64.287  40.554  1.00 24.49      1tnf C  
ATOM   1037  C   TYR A 115      13.780  63.141  39.700  1.00 22.82      1tnf C  
ATOM   1038  O   TYR A 115      12.907  62.341  39.362  1.00 27.52      1tnf O  
ATOM   1039  CB  TYR A 115      12.727  63.662  41.855  1.00 23.34      1tnf C  
ATOM   1040  CG  TYR A 115      12.141  64.653  42.858  1.00 22.67      1tnf C  
ATOM   1041  CD1 TYR A 115      10.774  64.866  42.959  1.00 22.76      1tnf C  
ATOM   1042  CD2 TYR A 115      13.011  65.358  43.664  1.00 23.18      1tnf C  
ATOM   1043  CE1 TYR A 115      10.307  65.795  43.877  1.00 24.97      1tnf C  
ATOM   1044  CE2 TYR A 115      12.559  66.282  44.579  1.00 24.01      1tnf C  
ATOM   1045  CZ  TYR A 115      11.208  66.491  44.677  1.00 24.51      1tnf C  
ATOM   1046  OH  TYR A 115      10.775  67.422  45.589  1.00 24.94      1tnf O  
ATOM   1047  HN  TYR A 115      11.588  64.479  39.261  1.00  0.00      1tnf H  
ATOM   1048  HH  TYR A 115       9.839  67.567  45.657  1.00  0.00      1tnf H  
ATOM   1049  N   GLU A 116      15.044  63.034  39.282  1.00 20.42      1tnf N  
ATOM   1050  CA  GLU A 116      15.521  61.857  38.567  1.00 21.75      1tnf C  
ATOM   1051  C   GLU A 116      16.547  61.012  39.352  1.00 19.28      1tnf C  
ATOM   1052  O   GLU A 116      17.627  61.518  39.703  1.00 20.69      1tnf O  
ATOM   1053  CB  GLU A 116      16.151  62.263  37.223  1.00 23.00      1tnf C  
ATOM   1054  CG  GLU A 116      15.181  62.580  36.075  1.00 26.77      1tnf C  
ATOM   1055  CD  GLU A 116      14.386  61.394  35.504  1.00 28.08      1tnf C  
ATOM   1056  OE1 GLU A 116      14.451  61.181  34.296  1.00 30.21      1tnf O  
ATOM   1057  OE2 GLU A 116      13.692  60.673  36.239  1.00 31.21      1tnf O1-
ATOM   1058  HN  GLU A 116      15.694  63.798  39.468  1.00  0.00      1tnf H  
ATOM   1059  N   PRO A 117      16.309  59.740  39.690  1.00 14.13      1tnf N  
ATOM   1060  CA  PRO A 117      17.297  58.907  40.331  1.00 15.24      1tnf C  
ATOM   1061  C   PRO A 117      18.228  58.102  39.414  1.00 17.23      1tnf C  
ATOM   1062  O   PRO A 117      17.790  57.271  38.617  1.00 21.00      1tnf O  
ATOM   1063  CB  PRO A 117      16.439  58.085  41.261  1.00 10.34      1tnf C  
ATOM   1064  CG  PRO A 117      15.247  57.797  40.426  1.00  7.83      1tnf C  
ATOM   1065  CD  PRO A 117      15.003  59.123  39.770  1.00 12.93      1tnf C  
ATOM   1066  N   ILE A 118      19.528  58.275  39.450  1.00 16.25      1tnf N  
ATOM   1067  CA  ILE A 118      20.354  57.368  38.685  1.00 15.30      1tnf C  
ATOM   1068  C   ILE A 118      21.029  56.427  39.681  1.00 15.70      1tnf C  
ATOM   1069  O   ILE A 118      21.568  56.900  40.695  1.00 15.77      1tnf O  
ATOM   1070  CB  ILE A 118      21.407  58.143  37.861  1.00 13.86      1tnf C  
ATOM   1071  CG1 ILE A 118      20.768  59.067  36.862  1.00 11.79      1tnf C  
ATOM   1072  CG2 ILE A 118      22.258  57.131  37.134  1.00 13.43      1tnf C  
ATOM   1073  CD1 ILE A 118      21.820  59.662  35.931  1.00 12.60      1tnf C  
ATOM   1074  HN  ILE A 118      19.943  59.026  40.001  1.00  0.00      1tnf H  
ATOM   1075  N   TYR A 119      21.009  55.121  39.418  1.00 13.79      1tnf N  
ATOM   1076  CA  TYR A 119      21.733  54.177  40.233  1.00 17.73      1tnf C  
ATOM   1077  C   TYR A 119      22.700  53.395  39.316  1.00 20.17      1tnf C  
ATOM   1078  O   TYR A 119      22.388  53.188  38.143  1.00 24.02      1tnf O  
ATOM   1079  CB  TYR A 119      20.717  53.287  40.917  1.00 18.24      1tnf C  
ATOM   1080  CG  TYR A 119      21.415  52.175  41.688  1.00 23.93      1tnf C  
ATOM   1081  CD1 TYR A 119      22.150  52.501  42.804  1.00 26.68      1tnf C  
ATOM   1082  CD2 TYR A 119      21.324  50.847  41.309  1.00 25.28      1tnf C  
ATOM   1083  CE1 TYR A 119      22.797  51.540  43.556  1.00 28.05      1tnf C  
ATOM   1084  CE2 TYR A 119      21.974  49.882  42.056  1.00 27.67      1tnf C  
ATOM   1085  CZ  TYR A 119      22.699  50.232  43.184  1.00 26.81      1tnf C  
ATOM   1086  OH  TYR A 119      23.300  49.280  43.980  1.00 26.19      1tnf O  
ATOM   1087  HN  TYR A 119      20.469  54.781  38.622  1.00  0.00      1tnf H  
ATOM   1088  HH  TYR A 119      23.797  49.520  44.753  1.00  0.00      1tnf H  
ATOM   1089  N   LEU A 120      23.869  52.913  39.751  1.00 20.10      1tnf N  
ATOM   1090  CA  LEU A 120      24.890  52.246  38.922  1.00 20.06      1tnf C  
ATOM   1091  C   LEU A 120      25.547  51.126  39.722  1.00 18.29      1tnf C  
ATOM   1092  O   LEU A 120      25.580  51.271  40.952  1.00 18.05      1tnf O  
ATOM   1093  CB  LEU A 120      26.007  53.227  38.536  1.00 20.66      1tnf C  
ATOM   1094  CG  LEU A 120      26.129  53.719  37.094  1.00 25.32      1tnf C  
ATOM   1095  CD1 LEU A 120      24.809  54.216  36.524  1.00 24.79      1tnf C  
ATOM   1096  CD2 LEU A 120      27.149  54.836  37.097  1.00 22.56      1tnf C  
ATOM   1097  HN  LEU A 120      24.073  53.016  40.745  1.00  0.00      1tnf H  
ATOM   1098  N   GLY A 121      26.115  50.048  39.171  1.00 16.75      1tnf N  
ATOM   1099  CA  GLY A 121      26.787  49.081  40.031  1.00 16.28      1tnf C  
ATOM   1100  C   GLY A 121      27.153  47.761  39.357  1.00 16.54      1tnf C  
ATOM   1101  O   GLY A 121      26.300  47.204  38.641  1.00 11.95      1tnf O  
ATOM   1102  HN  GLY A 121      26.079  49.904  38.162  1.00  0.00      1tnf H  
ATOM   1103  N   GLY A 122      28.379  47.237  39.555  1.00 14.48      1tnf N  
ATOM   1104  CA  GLY A 122      28.760  45.996  38.889  1.00 14.42      1tnf C  
ATOM   1105  C   GLY A 122      30.037  45.353  39.402  1.00 14.67      1tnf C  
ATOM   1106  O   GLY A 122      30.776  46.018  40.132  1.00 18.80      1tnf O  
ATOM   1107  HN  GLY A 122      29.041  47.709  40.171  1.00  0.00      1tnf H  
ATOM   1108  N   VAL A 123      30.330  44.096  39.075  1.00  9.04      1tnf N  
ATOM   1109  CA  VAL A 123      31.518  43.483  39.615  1.00  8.88      1tnf C  
ATOM   1110  C   VAL A 123      32.697  43.626  38.663  1.00  8.70      1tnf C  
ATOM   1111  O   VAL A 123      32.649  43.320  37.468  1.00 13.23      1tnf O  
ATOM   1112  CB  VAL A 123      31.287  41.954  39.952  1.00  8.62      1tnf C  
ATOM   1113  CG1 VAL A 123      32.446  41.463  40.819  1.00  7.25      1tnf C  
ATOM   1114  CG2 VAL A 123      30.010  41.736  40.745  1.00  7.09      1tnf C  
ATOM   1115  HN  VAL A 123      29.720  43.572  38.448  1.00  0.00      1tnf H  
ATOM   1116  N   PHE A 124      33.776  44.115  39.226  1.00  7.91      1tnf N  
ATOM   1117  CA  PHE A 124      35.026  44.331  38.530  1.00  9.72      1tnf C  
ATOM   1118  C   PHE A 124      36.197  43.730  39.317  1.00 12.08      1tnf C  
ATOM   1119  O   PHE A 124      36.131  43.511  40.524  1.00 17.61      1tnf O  
ATOM   1120  CB  PHE A 124      35.229  45.857  38.317  1.00 11.49      1tnf C  
ATOM   1121  CG  PHE A 124      34.166  46.515  37.453  1.00 10.81      1tnf C  
ATOM   1122  CD1 PHE A 124      33.072  47.089  38.058  1.00 10.87      1tnf C  
ATOM   1123  CD2 PHE A 124      34.265  46.449  36.076  1.00 12.17      1tnf C  
ATOM   1124  CE1 PHE A 124      32.052  47.585  37.283  1.00 10.59      1tnf C  
ATOM   1125  CE2 PHE A 124      33.241  46.959  35.302  1.00 13.50      1tnf C  
ATOM   1126  CZ  PHE A 124      32.130  47.517  35.916  1.00 14.67      1tnf C  
ATOM   1127  HN  PHE A 124      33.731  44.358  40.216  1.00  0.00      1tnf H  
ATOM   1128  N   GLN A 125      37.322  43.417  38.694  1.00 17.02      1tnf N  
ATOM   1129  CA  GLN A 125      38.492  42.844  39.348  1.00 15.27      1tnf C  
ATOM   1130  C   GLN A 125      39.455  44.000  39.510  1.00 14.64      1tnf C  
ATOM   1131  O   GLN A 125      40.181  44.286  38.560  1.00 15.96      1tnf O  
ATOM   1132  CB  GLN A 125      39.073  41.784  38.460  1.00 14.55      1tnf C  
ATOM   1133  CG  GLN A 125      40.423  41.309  38.900  1.00 24.75      1tnf C  
ATOM   1134  CD  GLN A 125      41.525  41.371  37.831  1.00 29.04      1tnf C  
ATOM   1135  NE2 GLN A 125      42.613  42.129  37.981  1.00 32.30      1tnf N  
ATOM   1136  OE1 GLN A 125      41.457  40.696  36.801  1.00 33.17      1tnf O  
ATOM   1137  HN  GLN A 125      37.374  43.588  37.690  1.00  0.00      1tnf H  
ATOM   1138 1HE2 GLN A 125      43.345  42.170  37.271  1.00  0.00      1tnf H  
ATOM   1139 2HE2 GLN A 125      42.669  42.687  38.833  1.00  0.00      1tnf H  
ATOM   1140  N   LEU A 126      39.504  44.699  40.639  1.00 12.53      1tnf N  
ATOM   1141  CA  LEU A 126      40.454  45.809  40.754  1.00 13.41      1tnf C  
ATOM   1142  C   LEU A 126      41.854  45.361  41.193  1.00 12.86      1tnf C  
ATOM   1143  O   LEU A 126      42.072  44.159  41.339  1.00 12.02      1tnf O  
ATOM   1144  CB  LEU A 126      39.867  46.851  41.728  1.00 13.01      1tnf C  
ATOM   1145  CG  LEU A 126      38.594  47.438  41.172  1.00 12.11      1tnf C  
ATOM   1146  CD1 LEU A 126      37.694  48.056  42.194  1.00 10.20      1tnf C  
ATOM   1147  CD2 LEU A 126      39.040  48.435  40.149  1.00 12.93      1tnf C  
ATOM   1148  HN  LEU A 126      38.887  44.466  41.417  1.00  0.00      1tnf H  
ATOM   1149  N   GLU A 127      42.850  46.248  41.317  1.00 12.50      1tnf N  
ATOM   1150  CA  GLU A 127      44.176  45.889  41.824  1.00 15.87      1tnf C  
ATOM   1151  C   GLU A 127      44.571  46.826  42.937  1.00 15.74      1tnf C  
ATOM   1152  O   GLU A 127      43.913  47.839  43.145  1.00 20.11      1tnf O  
ATOM   1153  CB  GLU A 127      45.304  46.037  40.859  1.00 16.83      1tnf C  
ATOM   1154  CG  GLU A 127      45.068  45.513  39.469  1.00 23.89      1tnf C  
ATOM   1155  CD  GLU A 127      46.379  45.133  38.804  1.00 25.87      1tnf C  
ATOM   1156  OE1 GLU A 127      46.484  43.979  38.342  1.00 24.89      1tnf O  
ATOM   1157  OE2 GLU A 127      47.275  45.993  38.803  1.00 26.86      1tnf O1-
ATOM   1158  HN  GLU A 127      42.677  47.216  41.046  1.00  0.00      1tnf H  
ATOM   1159  N   LYS A 128      45.651  46.587  43.661  1.00 19.60      1tnf N  
ATOM   1160  CA  LYS A 128      46.075  47.588  44.633  1.00 23.52      1tnf C  
ATOM   1161  C   LYS A 128      46.608  48.901  44.016  1.00 19.52      1tnf C  
ATOM   1162  O   LYS A 128      47.372  48.921  43.053  1.00 20.74      1tnf O  
ATOM   1163  CB  LYS A 128      47.151  46.987  45.580  1.00 25.61      1tnf C  
ATOM   1164  CG  LYS A 128      47.897  47.933  46.564  1.00 27.67      1tnf C  
ATOM   1165  CD  LYS A 128      48.722  46.937  47.307  1.00 29.65      1tnf C  
ATOM   1166  CE  LYS A 128      49.949  47.520  47.934  1.00 32.85      1tnf C  
ATOM   1167  NZ  LYS A 128      50.682  46.398  48.495  1.00 37.61      1tnf N1+
ATOM   1168  HN  LYS A 128      46.177  45.721  43.542  1.00  0.00      1tnf H  
ATOM   1169  HZ1 LYS A 128      51.518  46.795  48.922  1.00  0.00      1tnf H  
ATOM   1170  HZ2 LYS A 128      50.881  45.662  47.817  1.00  0.00      1tnf H  
ATOM   1171  HZ3 LYS A 128      50.128  45.829  49.136  1.00  0.00      1tnf H  
ATOM   1172  N   GLY A 129      46.166  50.007  44.594  1.00 15.77      1tnf N  
ATOM   1173  CA  GLY A 129      46.663  51.287  44.254  1.00 14.86      1tnf C  
ATOM   1174  C   GLY A 129      45.793  51.954  43.230  1.00 18.48      1tnf C  
ATOM   1175  O   GLY A 129      45.953  53.170  43.167  1.00 23.77      1tnf O  
ATOM   1176  HN  GLY A 129      45.442  49.934  45.309  1.00  0.00      1tnf H  
ATOM   1177  N   ASP A 130      44.864  51.362  42.447  1.00 17.80      1tnf N  
ATOM   1178  CA  ASP A 130      44.151  52.182  41.445  1.00 19.28      1tnf C  
ATOM   1179  C   ASP A 130      42.972  52.952  41.977  1.00 15.81      1tnf C  
ATOM   1180  O   ASP A 130      42.228  52.374  42.762  1.00 16.36      1tnf O  
ATOM   1181  CB  ASP A 130      43.640  51.348  40.235  1.00 21.90      1tnf C  
ATOM   1182  CG  ASP A 130      42.742  50.142  40.474  1.00 24.53      1tnf C  
ATOM   1183  OD1 ASP A 130      41.668  50.293  41.070  1.00 26.68      1tnf O  
ATOM   1184  OD2 ASP A 130      43.117  49.053  40.036  1.00 22.48      1tnf O1-
ATOM   1185  HN  ASP A 130      44.659  50.368  42.546  1.00  0.00      1tnf H  
ATOM   1186  N   ARG A 131      42.808  54.231  41.611  1.00 15.36      1tnf N  
ATOM   1187  CA  ARG A 131      41.683  54.991  42.139  1.00 17.51      1tnf C  
ATOM   1188  C   ARG A 131      40.345  54.652  41.481  1.00 17.01      1tnf C  
ATOM   1189  O   ARG A 131      40.310  54.116  40.365  1.00 18.43      1tnf O  
ATOM   1190  CB  ARG A 131      41.823  56.477  41.953  1.00 19.98      1tnf C  
ATOM   1191  CG  ARG A 131      43.148  57.240  41.890  1.00 26.05      1tnf C  
ATOM   1192  CD  ARG A 131      43.819  57.619  43.205  1.00 30.35      1tnf C  
ATOM   1193  NE  ARG A 131      44.944  56.739  43.524  1.00 34.05      1tnf N  
ATOM   1194  CZ  ARG A 131      46.059  57.226  44.095  1.00 35.61      1tnf C  
ATOM   1195  NH1 ARG A 131      47.070  56.393  44.360  1.00 35.40      1tnf N1+
ATOM   1196  NH2 ARG A 131      46.174  58.528  44.404  1.00 35.57      1tnf N  
ATOM   1197  HN  ARG A 131      43.467  54.669  40.967  1.00  0.00      1tnf H  
ATOM   1198  HE  ARG A 131      44.881  55.744  43.310  1.00  0.00      1tnf H  
ATOM   1199 1HH1 ARG A 131      47.916  56.763  44.793  1.00  0.00      1tnf H  
ATOM   1200 2HH1 ARG A 131      46.983  55.404  44.125  1.00  0.00      1tnf H  
ATOM   1201 1HH2 ARG A 131      47.020  58.898  44.837  1.00  0.00      1tnf H  
ATOM   1202 2HH2 ARG A 131      45.402  59.164  44.202  1.00  0.00      1tnf H  
ATOM   1203  N   LEU A 132      39.214  54.891  42.163  1.00 18.05      1tnf N  
ATOM   1204  CA  LEU A 132      37.848  54.829  41.551  1.00 14.56      1tnf C  
ATOM   1205  C   LEU A 132      37.199  56.204  41.675  1.00 12.22      1tnf C  
ATOM   1206  O   LEU A 132      37.242  56.731  42.796  1.00 17.69      1tnf O  
ATOM   1207  CB  LEU A 132      36.924  53.839  42.244  1.00  9.12      1tnf C  
ATOM   1208  CG  LEU A 132      37.021  52.382  41.936  1.00  9.05      1tnf C  
ATOM   1209  CD1 LEU A 132      36.510  52.140  40.541  1.00  7.53      1tnf C  
ATOM   1210  CD2 LEU A 132      38.442  51.907  42.043  1.00  8.67      1tnf C  
ATOM   1211  HN  LEU A 132      39.289  55.128  43.152  1.00  0.00      1tnf H  
ATOM   1212  N   SER A 133      36.655  56.870  40.657  1.00 11.50      1tnf N  
ATOM   1213  CA  SER A 133      36.025  58.206  40.867  1.00 14.26      1tnf C  
ATOM   1214  C   SER A 133      34.503  58.162  40.699  1.00 14.50      1tnf C  
ATOM   1215  O   SER A 133      34.067  57.285  39.955  1.00 22.58      1tnf O  
ATOM   1216  CB  SER A 133      36.541  59.254  39.872  1.00  8.86      1tnf C  
ATOM   1217  OG  SER A 133      37.933  59.308  40.078  1.00 15.39      1tnf O  
ATOM   1218  HN  SER A 133      36.670  56.461  39.723  1.00  0.00      1tnf H  
ATOM   1219  HG  SER A 133      38.252  59.957  39.462  1.00  0.00      1tnf H  
ATOM   1220  N   ALA A 134      33.594  58.928  41.298  1.00 13.08      1tnf N  
ATOM   1221  CA  ALA A 134      32.216  58.834  40.858  1.00 11.26      1tnf C  
ATOM   1222  C   ALA A 134      31.547  60.173  40.533  1.00 14.59      1tnf C  
ATOM   1223  O   ALA A 134      30.726  60.642  41.325  1.00 15.61      1tnf O  
ATOM   1224  CB  ALA A 134      31.478  58.108  41.944  1.00 15.70      1tnf C  
ATOM   1225  HN  ALA A 134      33.861  59.566  42.048  1.00  0.00      1tnf H  
ATOM   1226  N   GLU A 135      31.818  60.881  39.428  1.00 17.69      1tnf N  
ATOM   1227  CA  GLU A 135      31.164  62.206  39.263  1.00 20.57      1tnf C  
ATOM   1228  C   GLU A 135      29.869  62.270  38.486  1.00 20.00      1tnf C  
ATOM   1229  O   GLU A 135      29.505  61.378  37.712  1.00 21.48      1tnf O  
ATOM   1230  CB  GLU A 135      31.974  63.287  38.554  1.00 19.66      1tnf C  
ATOM   1231  CG  GLU A 135      33.470  63.323  38.762  1.00 20.19      1tnf C  
ATOM   1232  CD  GLU A 135      34.247  62.454  37.779  1.00 20.51      1tnf C  
ATOM   1233  OE1 GLU A 135      35.369  62.853  37.458  1.00 20.42      1tnf O  
ATOM   1234  OE2 GLU A 135      33.745  61.406  37.348  1.00 21.14      1tnf O1-
ATOM   1235  HN  GLU A 135      32.456  60.520  38.719  1.00  0.00      1tnf H  
ATOM   1236  N   ILE A 136      29.147  63.333  38.832  1.00 22.36      1tnf N  
ATOM   1237  CA  ILE A 136      27.991  63.774  38.030  1.00 22.29      1tnf C  
ATOM   1238  C   ILE A 136      28.323  65.106  37.309  1.00 21.10      1tnf C  
ATOM   1239  O   ILE A 136      29.083  65.951  37.799  1.00 23.28      1tnf O  
ATOM   1240  CB  ILE A 136      26.717  64.017  38.857  1.00 19.88      1tnf C  
ATOM   1241  CG1 ILE A 136      27.030  64.914  39.998  1.00 17.75      1tnf C  
ATOM   1242  CG2 ILE A 136      26.135  62.692  39.335  1.00 22.68      1tnf C  
ATOM   1243  CD1 ILE A 136      25.880  65.824  40.046  1.00 17.31      1tnf C  
ATOM   1244  HN  ILE A 136      29.399  63.855  39.671  1.00  0.00      1tnf H  
ATOM   1245  N   ASN A 137      27.770  65.331  36.124  1.00 19.00      1tnf N  
ATOM   1246  CA  ASN A 137      28.017  66.526  35.347  1.00 16.85      1tnf C  
ATOM   1247  C   ASN A 137      27.195  67.680  35.798  1.00 17.73      1tnf C  
ATOM   1248  O   ASN A 137      27.513  68.818  35.432  1.00 23.77      1tnf O  
ATOM   1249  CB  ASN A 137      27.693  66.330  33.902  1.00 18.18      1tnf C  
ATOM   1250  CG  ASN A 137      26.226  66.059  33.678  1.00 21.36      1tnf C  
ATOM   1251  ND2 ASN A 137      25.806  66.383  32.481  1.00 23.85      1tnf N  
ATOM   1252  OD1 ASN A 137      25.482  65.578  34.546  1.00 23.04      1tnf O  
ATOM   1253  HN  ASN A 137      27.139  64.626  35.742  1.00  0.00      1tnf H  
ATOM   1254 1HD2 ASN A 137      26.418  66.779  31.767  1.00  0.00      1tnf H  
ATOM   1255 2HD2 ASN A 137      24.814  66.200  32.330  1.00  0.00      1tnf H  
ATOM   1256  N   ARG A 138      26.091  67.468  36.500  1.00 16.82      1tnf N  
ATOM   1257  CA  ARG A 138      25.449  68.648  36.995  1.00 20.19      1tnf C  
ATOM   1258  C   ARG A 138      25.211  68.719  38.497  1.00 20.23      1tnf C  
ATOM   1259  O   ARG A 138      24.031  68.685  38.866  1.00 21.54      1tnf O  
ATOM   1260  CB  ARG A 138      24.171  68.807  36.170  1.00 24.11      1tnf C  
ATOM   1261  CG  ARG A 138      24.365  69.927  35.111  1.00 26.83      1tnf C  
ATOM   1262  CD  ARG A 138      23.236  69.790  34.134  1.00 29.88      1tnf C  
ATOM   1263  NE  ARG A 138      22.990  70.985  33.371  1.00 32.53      1tnf N  
ATOM   1264  CZ  ARG A 138      22.300  72.074  33.786  1.00 34.73      1tnf C  
ATOM   1265  NH1 ARG A 138      22.148  73.035  32.886  1.00 39.13      1tnf N1+
ATOM   1266  NH2 ARG A 138      21.839  72.348  35.009  1.00 29.42      1tnf N  
ATOM   1267  HN  ARG A 138      25.725  66.532  36.675  1.00  0.00      1tnf H  
ATOM   1268  HE  ARG A 138      23.372  71.015  32.426  1.00  0.00      1tnf H  
ATOM   1269 1HH1 ARG A 138      22.500  72.826  31.952  1.00  0.00      1tnf H  
ATOM   1270 2HH1 ARG A 138      21.628  73.855  33.199  1.00  0.00      1tnf H  
ATOM   1271 1HH2 ARG A 138      21.956  71.608  35.702  1.00  0.00      1tnf H  
ATOM   1272 2HH2 ARG A 138      21.319  73.168  35.322  1.00  0.00      1tnf H  
ATOM   1273  N   PRO A 139      26.208  68.867  39.421  1.00 16.38      1tnf N  
ATOM   1274  CA  PRO A 139      26.003  69.105  40.838  1.00 16.52      1tnf C  
ATOM   1275  C   PRO A 139      24.907  70.085  41.180  1.00 18.25      1tnf C  
ATOM   1276  O   PRO A 139      24.257  69.809  42.170  1.00 23.18      1tnf O  
ATOM   1277  CB  PRO A 139      27.336  69.529  41.381  1.00 13.08      1tnf C  
ATOM   1278  CG  PRO A 139      28.059  69.971  40.177  1.00 13.26      1tnf C  
ATOM   1279  CD  PRO A 139      27.641  68.881  39.193  1.00 16.95      1tnf C  
ATOM   1280  N   ASP A 140      24.603  71.158  40.452  1.00 15.99      1tnf N  
ATOM   1281  CA  ASP A 140      23.463  72.009  40.784  1.00 17.91      1tnf C  
ATOM   1282  C   ASP A 140      22.131  71.271  40.879  1.00 18.35      1tnf C  
ATOM   1283  O   ASP A 140      21.226  71.653  41.603  1.00 19.50      1tnf O  
ATOM   1284  CB  ASP A 140      23.305  73.172  39.764  1.00 18.82      1tnf C  
ATOM   1285  CG  ASP A 140      23.789  73.058  38.313  1.00 19.55      1tnf C  
ATOM   1286  OD1 ASP A 140      24.360  72.047  37.915  1.00 21.36      1tnf O  
ATOM   1287  OD2 ASP A 140      23.622  74.019  37.565  1.00 19.61      1tnf O1-
ATOM   1288  HN  ASP A 140      25.180  71.391  39.644  1.00  0.00      1tnf H  
ATOM   1289  N   TYR A 141      22.002  70.161  40.185  1.00 19.46      1tnf N  
ATOM   1290  CA  TYR A 141      20.809  69.354  40.244  1.00 18.71      1tnf C  
ATOM   1291  C   TYR A 141      20.829  68.317  41.348  1.00 20.77      1tnf C  
ATOM   1292  O   TYR A 141      20.008  67.397  41.326  1.00 24.89      1tnf O  
ATOM   1293  CB  TYR A 141      20.610  68.668  38.904  1.00 19.19      1tnf C  
ATOM   1294  CG  TYR A 141      20.075  69.610  37.846  1.00 20.26      1tnf C  
ATOM   1295  CD1 TYR A 141      20.554  69.567  36.571  1.00 17.69      1tnf C  
ATOM   1296  CD2 TYR A 141      19.073  70.509  38.182  1.00 22.33      1tnf C  
ATOM   1297  CE1 TYR A 141      20.007  70.409  35.648  1.00 20.74      1tnf C  
ATOM   1298  CE2 TYR A 141      18.531  71.366  37.261  1.00 20.87      1tnf C  
ATOM   1299  CZ  TYR A 141      19.023  71.308  35.996  1.00 21.27      1tnf C  
ATOM   1300  OH  TYR A 141      18.561  72.234  35.094  1.00 25.96      1tnf O  
ATOM   1301  HN  TYR A 141      22.771  69.862  39.586  1.00  0.00      1tnf H  
ATOM   1302  HH  TYR A 141      17.882  72.854  35.334  1.00  0.00      1tnf H  
ATOM   1303  N   LEU A 142      21.720  68.397  42.334  1.00 18.00      1tnf N  
ATOM   1304  CA  LEU A 142      21.739  67.398  43.383  1.00 17.94      1tnf C  
ATOM   1305  C   LEU A 142      20.754  67.701  44.492  1.00 20.36      1tnf C  
ATOM   1306  O   LEU A 142      20.543  68.852  44.917  1.00 25.79      1tnf O  
ATOM   1307  CB  LEU A 142      23.114  67.273  44.005  1.00 14.15      1tnf C  
ATOM   1308  CG  LEU A 142      24.125  66.536  43.175  1.00 14.41      1tnf C  
ATOM   1309  CD1 LEU A 142      25.489  66.551  43.846  1.00 15.65      1tnf C  
ATOM   1310  CD2 LEU A 142      23.651  65.113  43.015  1.00 10.55      1tnf C  
ATOM   1311  HN  LEU A 142      22.392  69.164  42.351  1.00  0.00      1tnf H  
ATOM   1312  N   LEU A 143      20.135  66.641  44.992  1.00 20.58      1tnf N  
ATOM   1313  CA  LEU A 143      19.182  66.766  46.084  1.00 19.37      1tnf C  
ATOM   1314  C   LEU A 143      19.914  66.772  47.402  1.00 19.57      1tnf C  
ATOM   1315  O   LEU A 143      20.794  65.948  47.552  1.00 19.79      1tnf O  
ATOM   1316  CB  LEU A 143      18.246  65.602  46.052  1.00 17.74      1tnf C  
ATOM   1317  CG  LEU A 143      16.871  65.679  46.616  1.00 18.29      1tnf C  
ATOM   1318  CD1 LEU A 143      16.301  67.072  46.535  1.00 19.77      1tnf C  
ATOM   1319  CD2 LEU A 143      15.988  64.802  45.739  1.00 24.78      1tnf C  
ATOM   1320  HN  LEU A 143      20.331  65.719  44.603  1.00  0.00      1tnf H  
ATOM   1321  N   PHE A 144      19.653  67.629  48.388  1.00 21.14      1tnf N  
ATOM   1322  CA  PHE A 144      20.282  67.499  49.707  1.00 21.29      1tnf C  
ATOM   1323  C   PHE A 144      19.276  67.780  50.810  1.00 24.30      1tnf C  
ATOM   1324  O   PHE A 144      19.340  68.734  51.593  1.00 23.96      1tnf O  
ATOM   1325  CB  PHE A 144      21.489  68.452  49.880  1.00 19.81      1tnf C  
ATOM   1326  CG  PHE A 144      22.703  67.977  49.109  1.00 15.15      1tnf C  
ATOM   1327  CD1 PHE A 144      23.151  66.691  49.282  1.00 13.61      1tnf C  
ATOM   1328  CD2 PHE A 144      23.344  68.828  48.225  1.00 12.92      1tnf C  
ATOM   1329  CE1 PHE A 144      24.244  66.264  48.556  1.00 15.19      1tnf C  
ATOM   1330  CE2 PHE A 144      24.441  68.377  47.515  1.00 11.48      1tnf C  
ATOM   1331  CZ  PHE A 144      24.890  67.097  47.678  1.00 10.62      1tnf C  
ATOM   1332  HN  PHE A 144      19.000  68.394  48.222  1.00  0.00      1tnf H  
ATOM   1333  N   ALA A 145      18.310  66.864  50.756  1.00 25.02      1tnf N  
ATOM   1334  CA  ALA A 145      17.234  66.827  51.709  1.00 31.22      1tnf C  
ATOM   1335  C   ALA A 145      16.974  65.382  52.114  1.00 37.68      1tnf C  
ATOM   1336  O   ALA A 145      16.047  65.062  52.872  1.00 42.45      1tnf O  
ATOM   1337  CB  ALA A 145      15.971  67.385  51.098  1.00 28.91      1tnf C  
ATOM   1338  HN  ALA A 145      18.335  66.165  50.013  1.00  0.00      1tnf H  
ATOM   1339  N   GLU A 146      17.775  64.422  51.670  1.00 41.42      1tnf N  
ATOM   1340  CA  GLU A 146      17.488  63.020  51.969  1.00 43.26      1tnf C  
ATOM   1341  C   GLU A 146      18.831  62.395  52.142  1.00 44.09      1tnf C  
ATOM   1342  O   GLU A 146      19.573  62.715  51.217  1.00 44.56      1tnf O  
ATOM   1343  CB  GLU A 146      16.801  62.351  50.812  1.00 41.97      1tnf C  
ATOM   1344  CG  GLU A 146      15.377  62.787  50.719  1.00 41.76      1tnf C  
ATOM   1345  CD  GLU A 146      15.068  63.052  49.280  1.00 44.55      1tnf C  
ATOM   1346  OE1 GLU A 146      15.207  62.147  48.442  1.00 45.80      1tnf O  
ATOM   1347  OE2 GLU A 146      14.705  64.183  48.995  1.00 46.33      1tnf O1-
ATOM   1348  HN  GLU A 146      18.597  64.664  51.116  1.00  0.00      1tnf H  
ATOM   1349  N   SER A 147      19.284  61.601  53.135  1.00 43.94      1tnf N  
ATOM   1350  CA  SER A 147      20.678  61.201  52.968  1.00 46.06      1tnf C  
ATOM   1351  C   SER A 147      20.872  59.886  52.260  1.00 46.71      1tnf C  
ATOM   1352  O   SER A 147      21.855  59.630  51.526  1.00 47.61      1tnf O  
ATOM   1353  CB  SER A 147      21.368  61.146  54.270  1.00 47.70      1tnf C  
ATOM   1354  OG  SER A 147      22.743  61.186  53.922  1.00 50.04      1tnf O  
ATOM   1355  HN  SER A 147      18.709  61.309  53.925  1.00  0.00      1tnf H  
ATOM   1356  HG  SER A 147      23.188  61.151  54.761  1.00  0.00      1tnf H  
ATOM   1357  N   GLY A 148      19.761  59.146  52.355  1.00 47.24      1tnf N  
ATOM   1358  CA  GLY A 148      19.657  57.832  51.716  1.00 42.04      1tnf C  
ATOM   1359  C   GLY A 148      19.252  57.942  50.269  1.00 33.74      1tnf C  
ATOM   1360  O   GLY A 148      18.214  57.400  49.875  1.00 28.13      1tnf O  
ATOM   1361  HN  GLY A 148      18.967  59.506  52.885  1.00  0.00      1tnf H  
ATOM   1362  N   GLN A 149      20.198  58.647  49.621  1.00 30.48      1tnf N  
ATOM   1363  CA  GLN A 149      20.099  59.115  48.269  1.00 28.85      1tnf C  
ATOM   1364  C   GLN A 149      21.385  59.035  47.459  1.00 24.96      1tnf C  
ATOM   1365  O   GLN A 149      21.470  58.113  46.640  1.00 20.92      1tnf O  
ATOM   1366  CB  GLN A 149      19.579  60.568  48.263  1.00 32.01      1tnf C  
ATOM   1367  CG  GLN A 149      20.437  61.746  48.679  1.00 34.39      1tnf C  
ATOM   1368  CD  GLN A 149      20.090  63.086  48.022  1.00 36.16      1tnf C  
ATOM   1369  NE2 GLN A 149      19.345  63.925  48.733  1.00 37.26      1tnf N  
ATOM   1370  OE1 GLN A 149      20.439  63.393  46.869  1.00 38.04      1tnf O  
ATOM   1371  HN  GLN A 149      21.053  58.866  50.132  1.00  0.00      1tnf H  
ATOM   1372 1HE2 GLN A 149      19.114  64.817  48.296  1.00  0.00      1tnf H  
ATOM   1373 2HE2 GLN A 149      19.059  63.673  49.679  1.00  0.00      1tnf H  
ATOM   1374  N   VAL A 150      22.400  59.905  47.692  1.00 23.03      1tnf N  
ATOM   1375  CA  VAL A 150      23.624  59.931  46.903  1.00 20.37      1tnf C  
ATOM   1376  C   VAL A 150      24.874  59.489  47.651  1.00 17.18      1tnf C  
ATOM   1377  O   VAL A 150      25.280  60.071  48.636  1.00 21.55      1tnf O  
ATOM   1378  CB  VAL A 150      23.760  61.353  46.273  1.00 18.90      1tnf C  
ATOM   1379  CG1 VAL A 150      23.530  62.448  47.245  1.00 18.26      1tnf C  
ATOM   1380  CG2 VAL A 150      25.150  61.450  45.658  1.00 19.12      1tnf C  
ATOM   1381  HN  VAL A 150      22.301  60.573  48.457  1.00  0.00      1tnf H  
ATOM   1382  N   TYR A 151      25.503  58.439  47.149  1.00 18.50      1tnf N  
ATOM   1383  CA  TYR A 151      26.606  57.705  47.775  1.00 16.70      1tnf C  
ATOM   1384  C   TYR A 151      27.420  56.945  46.720  1.00 12.79      1tnf C  
ATOM   1385  O   TYR A 151      27.064  56.951  45.533  1.00 17.10      1tnf O  
ATOM   1386  CB  TYR A 151      26.079  56.669  48.845  1.00 14.73      1tnf C  
ATOM   1387  CG  TYR A 151      24.926  55.768  48.433  1.00 11.01      1tnf C  
ATOM   1388  CD1 TYR A 151      23.656  56.286  48.511  1.00 11.71      1tnf C  
ATOM   1389  CD2 TYR A 151      25.118  54.501  47.905  1.00 11.32      1tnf C  
ATOM   1390  CE1 TYR A 151      22.569  55.572  48.061  1.00  9.03      1tnf C  
ATOM   1391  CE2 TYR A 151      24.033  53.781  47.452  1.00  8.80      1tnf C  
ATOM   1392  CZ  TYR A 151      22.770  54.336  47.526  1.00  8.19      1tnf C  
ATOM   1393  OH  TYR A 151      21.668  53.701  47.015  1.00 15.38      1tnf O  
ATOM   1394  HN  TYR A 151      25.189  58.108  46.237  1.00  0.00      1tnf H  
ATOM   1395  HH  TYR A 151      21.808  52.839  46.642  1.00  0.00      1tnf H  
ATOM   1396  N   PHE A 152      28.435  56.230  47.190  1.00  4.98      1tnf N  
ATOM   1397  CA  PHE A 152      29.404  55.524  46.387  1.00  2.94      1tnf C  
ATOM   1398  C   PHE A 152      30.064  54.592  47.371  1.00  7.09      1tnf C  
ATOM   1399  O   PHE A 152      30.533  55.045  48.432  1.00  8.66      1tnf O  
ATOM   1400  CB  PHE A 152      30.421  56.508  45.875  1.00  5.86      1tnf C  
ATOM   1401  CG  PHE A 152      31.572  56.054  45.009  1.00  5.89      1tnf C  
ATOM   1402  CD1 PHE A 152      32.713  56.812  45.011  1.00  4.29      1tnf C  
ATOM   1403  CD2 PHE A 152      31.458  54.941  44.191  1.00  4.90      1tnf C  
ATOM   1404  CE1 PHE A 152      33.763  56.461  44.184  1.00  6.02      1tnf C  
ATOM   1405  CE2 PHE A 152      32.506  54.609  43.380  1.00  5.77      1tnf C  
ATOM   1406  CZ  PHE A 152      33.660  55.360  43.373  1.00  6.77      1tnf C  
ATOM   1407  HN  PHE A 152      28.539  56.175  48.203  1.00  0.00      1tnf H  
ATOM   1408  N   GLY A 153      30.119  53.309  47.074  1.00  5.85      1tnf N  
ATOM   1409  CA  GLY A 153      30.741  52.375  47.956  1.00  7.41      1tnf C  
ATOM   1410  C   GLY A 153      31.285  51.229  47.172  1.00 13.13      1tnf C  
ATOM   1411  O   GLY A 153      30.955  51.045  45.989  1.00 17.83      1tnf O  
ATOM   1412  HN  GLY A 153      29.711  52.978  46.200  1.00  0.00      1tnf H  
ATOM   1413  N   ILE A 154      32.151  50.467  47.832  1.00 14.46      1tnf N  
ATOM   1414  CA  ILE A 154      32.691  49.259  47.246  1.00 15.59      1tnf C  
ATOM   1415  C   ILE A 154      32.718  48.209  48.335  1.00 19.15      1tnf C  
ATOM   1416  O   ILE A 154      32.335  48.543  49.465  1.00 19.77      1tnf O  
ATOM   1417  CB  ILE A 154      34.140  49.395  46.679  1.00 16.18      1tnf C  
ATOM   1418  CG1 ILE A 154      35.052  50.335  47.427  1.00 15.04      1tnf C  
ATOM   1419  CG2 ILE A 154      33.940  49.823  45.261  1.00 15.29      1tnf C  
ATOM   1420  CD1 ILE A 154      36.427  50.240  46.795  1.00 16.02      1tnf C  
ATOM   1421  HN  ILE A 154      32.441  50.739  48.771  1.00  0.00      1tnf H  
ATOM   1422  N   ILE A 155      33.121  46.969  47.974  1.00 19.86      1tnf N  
ATOM   1423  CA  ILE A 155      33.214  45.807  48.857  1.00 19.28      1tnf C  
ATOM   1424  C   ILE A 155      33.849  44.603  48.137  1.00 22.12      1tnf C  
ATOM   1425  O   ILE A 155      33.366  44.174  47.075  1.00 22.12      1tnf O  
ATOM   1426  CB  ILE A 155      31.770  45.459  49.408  1.00 17.26      1tnf C  
ATOM   1427  CG1 ILE A 155      31.796  44.192  50.276  1.00 20.59      1tnf C  
ATOM   1428  CG2 ILE A 155      30.803  45.322  48.263  1.00 19.30      1tnf C  
ATOM   1429  CD1 ILE A 155      30.580  43.996  51.212  1.00 17.15      1tnf C  
ATOM   1430  HN  ILE A 155      33.384  46.832  46.998  1.00  0.00      1tnf H  
ATOM   1431  N   ALA A 156      34.963  44.061  48.643  1.00 23.07      1tnf N  
ATOM   1432  CA  ALA A 156      35.524  42.869  48.001  1.00 25.09      1tnf C  
ATOM   1433  C   ALA A 156      34.631  41.653  48.150  1.00 24.85      1tnf C  
ATOM   1434  O   ALA A 156      34.003  41.453  49.196  1.00 25.39      1tnf O  
ATOM   1435  CB  ALA A 156      36.859  42.456  48.596  1.00 28.46      1tnf C  
ATOM   1436  HN  ALA A 156      35.414  44.470  49.461  1.00  0.00      1tnf H  
ATOM   1437  N   LEU A 157      34.562  40.866  47.094  1.00 26.18      1tnf N  
ATOM   1438  CA  LEU A 157      33.788  39.642  47.124  1.00 27.63      1tnf C  
ATOM   1439  C   LEU A 157      34.713  38.460  46.814  1.00 30.56      1tnf C  
ATOM   1440  O   LEU A 157      35.792  38.671  46.218  1.00 34.61      1tnf O  
ATOM   1441  CB  LEU A 157      32.677  39.663  46.092  1.00 24.52      1tnf C  
ATOM   1442  CG  LEU A 157      31.590  40.671  46.255  1.00 23.07      1tnf C  
ATOM   1443  CD1 LEU A 157      31.810  41.583  45.082  1.00 24.65      1tnf C  
ATOM   1444  CD2 LEU A 157      30.164  40.088  46.285  1.00 18.96      1tnf C  
ATOM   1445  OXT LEU A 157      34.333  37.338  47.161  1.00 32.20      1tnf O1-
ATOM   1446  HN  LEU A 157      35.062  41.123  46.243  1.00  0.00      1tnf H  
ATOM   1447  N   ARG B   6      46.824  30.800  43.607  1.00 64.41      1tnf N  
ATOM   1448  CA  ARG B   6      46.892  32.032  42.812  1.00 64.18      1tnf C  
ATOM   1449  C   ARG B   6      45.651  32.737  43.313  1.00 61.83      1tnf C  
ATOM   1450  O   ARG B   6      44.655  32.031  43.466  1.00 62.89      1tnf O  
ATOM   1451  CB  ARG B   6      46.694  31.827  41.299  1.00 64.17      1tnf C  
ATOM   1452  HN1 ARG B   6      46.955  30.936  44.609  1.00  0.00      1tnf H  
ATOM   1453  HN2 ARG B   6      47.487  30.111  43.252  1.00  0.00      1tnf H  
ATOM   1454  HN3 ARG B   6      45.948  30.309  43.427  1.00  0.00      1tnf H  
ATOM   1455  N   THR B   7      45.638  34.034  43.555  1.00 59.18      1tnf N  
ATOM   1456  CA  THR B   7      44.447  34.613  44.159  1.00 59.19      1tnf C  
ATOM   1457  C   THR B   7      43.769  35.740  43.331  1.00 57.12      1tnf C  
ATOM   1458  O   THR B   7      43.503  36.844  43.819  1.00 59.02      1tnf O  
ATOM   1459  CB  THR B   7      45.037  34.932  45.590  1.00 59.30      1tnf C  
ATOM   1460  CG2 THR B   7      44.248  35.821  46.528  1.00 61.19      1tnf C  
ATOM   1461  OG1 THR B   7      45.155  33.630  46.159  1.00 58.04      1tnf O  
ATOM   1462  HN  THR B   7      46.443  34.617  43.324  1.00  0.00      1tnf H  
ATOM   1463  HG1 THR B   7      45.510  33.822  47.019  1.00  0.00      1tnf H  
ATOM   1464  N   PRO B   8      43.456  35.544  42.027  1.00 53.73      1tnf N  
ATOM   1465  CA  PRO B   8      42.239  36.123  41.441  1.00 49.90      1tnf C  
ATOM   1466  C   PRO B   8      41.031  35.775  42.311  1.00 46.32      1tnf C  
ATOM   1467  O   PRO B   8      40.629  36.613  43.119  1.00 45.06      1tnf O  
ATOM   1468  CB  PRO B   8      42.223  35.539  40.021  1.00 50.73      1tnf C  
ATOM   1469  CG  PRO B   8      43.700  35.528  39.649  1.00 50.60      1tnf C  
ATOM   1470  CD  PRO B   8      44.385  35.108  40.968  1.00 52.49      1tnf C  
ATOM   1471  N   SER B   9      40.492  34.550  42.218  1.00 43.27      1tnf N  
ATOM   1472  CA  SER B   9      39.361  34.051  43.008  1.00 39.84      1tnf C  
ATOM   1473  C   SER B   9      38.903  32.740  42.353  1.00 40.18      1tnf C  
ATOM   1474  O   SER B   9      39.071  32.596  41.129  1.00 40.33      1tnf O  
ATOM   1475  CB  SER B   9      38.178  35.022  42.998  1.00 36.07      1tnf C  
ATOM   1476  OG  SER B   9      37.305  34.793  44.084  1.00 38.02      1tnf O  
ATOM   1477  HN  SER B   9      40.904  33.910  41.539  1.00  0.00      1tnf H  
ATOM   1478  HG  SER B   9      36.571  35.396  44.078  1.00  0.00      1tnf H  
ATOM   1479  N   ASP B  10      38.416  31.725  43.089  1.00 38.36      1tnf N  
ATOM   1480  CA  ASP B  10      37.829  30.600  42.401  1.00 38.47      1tnf C  
ATOM   1481  C   ASP B  10      36.335  30.859  42.616  1.00 35.97      1tnf C  
ATOM   1482  O   ASP B  10      35.642  30.107  43.316  1.00 39.48      1tnf O  
ATOM   1483  CB  ASP B  10      38.237  29.168  42.970  1.00 42.79      1tnf C  
ATOM   1484  CG  ASP B  10      37.859  27.831  42.195  1.00 44.04      1tnf C  
ATOM   1485  OD1 ASP B  10      38.362  26.755  42.564  1.00 46.12      1tnf O  
ATOM   1486  OD2 ASP B  10      37.071  27.808  41.237  1.00 41.33      1tnf O1-
ATOM   1487  HN  ASP B  10      38.460  31.750  44.108  1.00  0.00      1tnf H  
ATOM   1488  N   LYS B  11      35.825  31.969  42.055  1.00 30.40      1tnf N  
ATOM   1489  CA  LYS B  11      34.394  32.285  42.108  1.00 26.78      1tnf C  
ATOM   1490  C   LYS B  11      33.968  32.338  40.654  1.00 22.11      1tnf C  
ATOM   1491  O   LYS B  11      34.746  32.944  39.913  1.00 25.99      1tnf O  
ATOM   1492  CB  LYS B  11      34.062  33.646  42.673  1.00 29.13      1tnf C  
ATOM   1493  CG  LYS B  11      34.257  33.789  44.171  1.00 35.54      1tnf C  
ATOM   1494  CD  LYS B  11      32.886  34.006  44.802  1.00 39.15      1tnf C  
ATOM   1495  CE  LYS B  11      32.943  34.332  46.302  1.00 42.42      1tnf C  
ATOM   1496  NZ  LYS B  11      33.125  33.161  47.160  1.00 43.61      1tnf N1+
ATOM   1497  HN  LYS B  11      36.455  32.613  41.576  1.00  0.00      1tnf H  
ATOM   1498  HZ1 LYS B  11      33.163  33.377  48.156  1.00  0.00      1tnf H  
ATOM   1499  HZ2 LYS B  11      33.951  32.635  46.877  1.00  0.00      1tnf H  
ATOM   1500  HZ3 LYS B  11      32.404  32.464  46.972  1.00  0.00      1tnf H  
ATOM   1501  N   PRO B  12      32.871  31.726  40.164  1.00 13.88      1tnf N  
ATOM   1502  CA  PRO B  12      32.207  32.029  38.908  1.00 11.92      1tnf C  
ATOM   1503  C   PRO B  12      31.877  33.477  38.786  1.00  9.98      1tnf C  
ATOM   1504  O   PRO B  12      31.127  33.967  39.620  1.00 10.99      1tnf O  
ATOM   1505  CB  PRO B  12      30.944  31.213  38.866  1.00 14.28      1tnf C  
ATOM   1506  CG  PRO B  12      30.955  30.334  40.074  1.00 13.15      1tnf C  
ATOM   1507  CD  PRO B  12      32.325  30.516  40.725  1.00 12.28      1tnf C  
ATOM   1508  N   VAL B  13      32.329  34.182  37.775  1.00 11.80      1tnf N  
ATOM   1509  CA  VAL B  13      32.045  35.594  37.751  1.00 12.96      1tnf C  
ATOM   1510  C   VAL B  13      31.862  35.979  36.319  1.00 15.46      1tnf C  
ATOM   1511  O   VAL B  13      32.518  35.386  35.454  1.00 14.70      1tnf O  
ATOM   1512  CB  VAL B  13      33.218  36.374  38.357  1.00 16.26      1tnf C  
ATOM   1513  CG1 VAL B  13      34.487  36.249  37.482  1.00 16.84      1tnf C  
ATOM   1514  CG2 VAL B  13      32.805  37.830  38.508  1.00 18.96      1tnf C  
ATOM   1515  HN  VAL B  13      32.866  33.742  37.028  1.00  0.00      1tnf H  
ATOM   1516  N   ALA B  14      31.037  36.969  36.043  1.00 17.08      1tnf N  
ATOM   1517  CA  ALA B  14      31.017  37.503  34.700  1.00 23.32      1tnf C  
ATOM   1518  C   ALA B  14      30.618  38.985  34.709  1.00 24.30      1tnf C  
ATOM   1519  O   ALA B  14      29.929  39.483  35.636  1.00 22.28      1tnf O  
ATOM   1520  CB  ALA B  14      30.029  36.724  33.785  1.00 25.49      1tnf C  
ATOM   1521  HN  ALA B  14      30.424  37.351  36.763  1.00  0.00      1tnf H  
ATOM   1522  N   HIS B  15      31.152  39.634  33.651  1.00 22.53      1tnf N  
ATOM   1523  CA  HIS B  15      30.825  41.000  33.364  1.00 23.40      1tnf C  
ATOM   1524  C   HIS B  15      30.972  41.352  31.894  1.00 21.61      1tnf C  
ATOM   1525  O   HIS B  15      31.919  42.014  31.494  1.00 19.77      1tnf O  
ATOM   1526  CB  HIS B  15      31.683  41.945  34.184  1.00 22.04      1tnf C  
ATOM   1527  CG  HIS B  15      31.098  43.360  34.062  1.00 23.53      1tnf C  
ATOM   1528  CD2 HIS B  15      31.730  44.409  33.421  1.00 21.26      1tnf C  
ATOM   1529  ND1 HIS B  15      29.933  43.805  34.537  1.00 23.67      1tnf N  
ATOM   1530  CE1 HIS B  15      29.865  45.072  34.209  1.00 24.02      1tnf C  
ATOM   1531  NE2 HIS B  15      30.940  45.429  33.545  1.00 21.50      1tnf N  
ATOM   1532  HN  HIS B  15      31.804  39.140  33.042  1.00  0.00      1tnf H  
ATOM   1533  HD1 HIS B  15      29.236  43.267  35.052  1.00  0.00      1tnf H  
ATOM   1534  HE2 HIS B  15      31.125  46.364  33.183  1.00  0.00      1tnf H  
ATOM   1535  N   VAL B  16      30.004  40.951  31.089  1.00 23.18      1tnf N  
ATOM   1536  CA  VAL B  16      30.062  41.306  29.680  1.00 25.76      1tnf C  
ATOM   1537  C   VAL B  16      29.404  42.630  29.317  1.00 24.37      1tnf C  
ATOM   1538  O   VAL B  16      28.342  43.012  29.831  1.00 21.38      1tnf O  
ATOM   1539  CB  VAL B  16      29.457  40.176  28.766  1.00 26.09      1tnf C  
ATOM   1540  CG1 VAL B  16      30.377  38.973  28.904  1.00 22.15      1tnf C  
ATOM   1541  CG2 VAL B  16      28.031  39.797  29.118  1.00 28.07      1tnf C  
ATOM   1542  HN  VAL B  16      29.226  40.400  31.451  1.00  0.00      1tnf H  
ATOM   1543  N   VAL B  17      30.143  43.318  28.447  1.00 25.62      1tnf N  
ATOM   1544  CA  VAL B  17      29.734  44.591  27.861  1.00 23.79      1tnf C  
ATOM   1545  C   VAL B  17      29.090  44.272  26.510  1.00 21.75      1tnf C  
ATOM   1546  O   VAL B  17      29.270  43.181  25.958  1.00 21.59      1tnf O  
ATOM   1547  CB  VAL B  17      31.001  45.539  27.727  1.00 22.85      1tnf C  
ATOM   1548  CG1 VAL B  17      31.416  45.944  26.312  1.00 16.65      1tnf C  
ATOM   1549  CG2 VAL B  17      30.601  46.817  28.482  1.00 26.32      1tnf C  
ATOM   1550  HN  VAL B  17      31.047  42.933  28.175  1.00  0.00      1tnf H  
ATOM   1551  N   ALA B  18      28.269  45.197  26.013  1.00 18.40      1tnf N  
ATOM   1552  CA  ALA B  18      27.690  44.997  24.715  1.00 18.07      1tnf C  
ATOM   1553  C   ALA B  18      28.638  45.519  23.632  1.00 22.05      1tnf C  
ATOM   1554  O   ALA B  18      29.420  46.492  23.749  1.00 19.56      1tnf O  
ATOM   1555  CB  ALA B  18      26.404  45.725  24.587  1.00 18.07      1tnf C  
ATOM   1556  HN  ALA B  18      28.055  46.038  26.549  1.00  0.00      1tnf H  
ATOM   1557  N   ASN B  19      28.578  44.793  22.530  1.00 23.16      1tnf N  
ATOM   1558  CA  ASN B  19      29.445  45.076  21.428  1.00 24.28      1tnf C  
ATOM   1559  C   ASN B  19      28.963  46.312  20.671  1.00 27.16      1tnf C  
ATOM   1560  O   ASN B  19      27.775  46.433  20.342  1.00 27.68      1tnf O  
ATOM   1561  CB  ASN B  19      29.443  43.843  20.613  1.00 23.45      1tnf C  
ATOM   1562  CG  ASN B  19      30.349  43.834  19.404  1.00 25.44      1tnf C  
ATOM   1563  ND2 ASN B  19      31.291  44.738  19.063  1.00 27.56      1tnf N  
ATOM   1564  OD1 ASN B  19      30.231  42.857  18.676  1.00 25.02      1tnf O  
ATOM   1565  HN  ASN B  19      27.909  44.026  22.464  1.00  0.00      1tnf H  
ATOM   1566 1HD2 ASN B  19      31.903  44.732  18.247  1.00  0.00      1tnf H  
ATOM   1567 2HD2 ASN B  19      31.389  45.552  19.670  1.00  0.00      1tnf H  
ATOM   1568  N   PRO B  20      29.849  47.274  20.398  1.00 26.41      1tnf N  
ATOM   1569  CA  PRO B  20      29.548  48.431  19.558  1.00 30.01      1tnf C  
ATOM   1570  C   PRO B  20      29.382  48.131  18.060  1.00 31.22      1tnf C  
ATOM   1571  O   PRO B  20      28.553  48.747  17.384  1.00 33.25      1tnf O  
ATOM   1572  CB  PRO B  20      30.685  49.394  19.848  1.00 30.00      1tnf C  
ATOM   1573  CG  PRO B  20      31.082  48.978  21.219  1.00 28.27      1tnf C  
ATOM   1574  CD  PRO B  20      31.108  47.472  21.077  1.00 25.66      1tnf C  
ATOM   1575  N   GLN B  21      30.136  47.209  17.453  1.00 30.06      1tnf N  
ATOM   1576  CA  GLN B  21      29.902  46.938  16.043  1.00 29.01      1tnf C  
ATOM   1577  C   GLN B  21      28.627  46.166  15.782  1.00 25.68      1tnf C  
ATOM   1578  O   GLN B  21      28.600  45.528  14.750  1.00 26.25      1tnf O  
ATOM   1579  CB  GLN B  21      31.086  46.150  15.428  1.00 34.27      1tnf C  
ATOM   1580  CG  GLN B  21      32.306  46.983  15.031  1.00 37.20      1tnf C  
ATOM   1581  CD  GLN B  21      32.814  47.725  16.247  1.00 38.99      1tnf C  
ATOM   1582  NE2 GLN B  21      32.433  48.991  16.495  1.00 37.64      1tnf N  
ATOM   1583  OE1 GLN B  21      33.481  47.088  17.064  1.00 41.11      1tnf O  
ATOM   1584  HN  GLN B  21      30.860  46.707  17.967  1.00  0.00      1tnf H  
ATOM   1585 1HE2 GLN B  21      32.776  49.491  17.315  1.00  0.00      1tnf H  
ATOM   1586 2HE2 GLN B  21      31.881  49.518  15.819  1.00  0.00      1tnf H  
ATOM   1587  N   ALA B  22      27.530  46.144  16.528  1.00 24.37      1tnf N  
ATOM   1588  CA  ALA B  22      26.465  45.284  16.090  1.00 28.13      1tnf C  
ATOM   1589  C   ALA B  22      25.209  46.079  15.836  1.00 32.63      1tnf C  
ATOM   1590  O   ALA B  22      24.717  46.792  16.702  1.00 34.27      1tnf O  
ATOM   1591  CB  ALA B  22      26.222  44.231  17.125  1.00 28.15      1tnf C  
ATOM   1592  HN  ALA B  22      27.446  46.710  17.372  1.00  0.00      1tnf H  
ATOM   1593  N   GLU B  23      24.725  46.055  14.582  1.00 36.69      1tnf N  
ATOM   1594  CA  GLU B  23      23.468  46.731  14.271  1.00 38.69      1tnf C  
ATOM   1595  C   GLU B  23      22.407  45.978  15.030  1.00 38.35      1tnf C  
ATOM   1596  O   GLU B  23      22.607  44.805  15.316  1.00 37.96      1tnf O  
ATOM   1597  CB  GLU B  23      23.105  46.720  12.745  1.00 40.01      1tnf C  
ATOM   1598  CG  GLU B  23      23.483  45.524  11.889  1.00 45.37      1tnf C  
ATOM   1599  CD  GLU B  23      22.478  44.355  11.825  1.00 51.19      1tnf C  
ATOM   1600  OE1 GLU B  23      22.121  43.732  12.846  1.00 51.15      1tnf O  
ATOM   1601  OE2 GLU B  23      22.058  44.044  10.701  1.00 53.83      1tnf O1-
ATOM   1602  HN  GLU B  23      25.236  45.565  13.848  1.00  0.00      1tnf H  
ATOM   1603  N   GLY B  24      21.374  46.706  15.435  1.00 38.14      1tnf N  
ATOM   1604  CA  GLY B  24      20.171  46.175  16.042  1.00 35.63      1tnf C  
ATOM   1605  C   GLY B  24      20.140  44.685  16.335  1.00 34.13      1tnf C  
ATOM   1606  O   GLY B  24      19.569  43.847  15.625  1.00 34.14      1tnf O  
ATOM   1607  HN  GLY B  24      21.432  47.717  15.309  1.00  0.00      1tnf H  
ATOM   1608  N   GLN B  25      20.937  44.456  17.369  1.00 33.56      1tnf N  
ATOM   1609  CA  GLN B  25      21.055  43.196  18.090  1.00 29.13      1tnf C  
ATOM   1610  C   GLN B  25      21.871  43.632  19.260  1.00 23.87      1tnf C  
ATOM   1611  O   GLN B  25      22.500  44.687  19.218  1.00 22.58      1tnf O  
ATOM   1612  CB  GLN B  25      21.837  42.099  17.365  1.00 29.54      1tnf C  
ATOM   1613  CG  GLN B  25      23.278  42.410  17.062  1.00 30.52      1tnf C  
ATOM   1614  CD  GLN B  25      23.761  41.567  15.915  1.00 30.28      1tnf C  
ATOM   1615  NE2 GLN B  25      24.349  40.443  16.291  1.00 29.73      1tnf N  
ATOM   1616  OE1 GLN B  25      23.608  41.885  14.735  1.00 29.93      1tnf O  
ATOM   1617  HN  GLN B  25      21.519  45.231  17.688  1.00  0.00      1tnf H  
ATOM   1618 1HE2 GLN B  25      24.677  39.871  15.513  1.00  0.00      1tnf H  
ATOM   1619 2HE2 GLN B  25      24.476  40.180  17.268  1.00  0.00      1tnf H  
ATOM   1620  N   LEU B  26      21.786  42.783  20.277  1.00 24.38      1tnf N  
ATOM   1621  CA  LEU B  26      22.505  42.907  21.530  1.00 20.84      1tnf C  
ATOM   1622  C   LEU B  26      23.482  41.720  21.560  1.00 19.45      1tnf C  
ATOM   1623  O   LEU B  26      23.145  40.556  21.732  1.00 14.77      1tnf O  
ATOM   1624  CB  LEU B  26      21.440  42.872  22.648  1.00 19.14      1tnf C  
ATOM   1625  CG  LEU B  26      21.778  42.856  24.119  1.00 17.92      1tnf C  
ATOM   1626  CD1 LEU B  26      22.909  43.789  24.452  1.00 15.22      1tnf C  
ATOM   1627  CD2 LEU B  26      20.508  43.226  24.856  1.00 19.96      1tnf C  
ATOM   1628  HN  LEU B  26      21.166  41.980  20.168  1.00  0.00      1tnf H  
ATOM   1629  N   GLN B  27      24.716  42.025  21.326  1.00 18.06      1tnf N  
ATOM   1630  CA  GLN B  27      25.763  41.046  21.254  1.00 22.66      1tnf C  
ATOM   1631  C   GLN B  27      26.512  41.316  22.557  1.00 20.05      1tnf C  
ATOM   1632  O   GLN B  27      26.862  42.480  22.770  1.00 19.00      1tnf O  
ATOM   1633  CB  GLN B  27      26.577  41.388  20.013  1.00 27.83      1tnf C  
ATOM   1634  CG  GLN B  27      27.663  40.462  19.498  1.00 34.60      1tnf C  
ATOM   1635  CD  GLN B  27      27.089  39.219  18.817  1.00 40.82      1tnf C  
ATOM   1636  NE2 GLN B  27      27.690  38.031  18.964  1.00 41.58      1tnf N  
ATOM   1637  OE1 GLN B  27      26.061  39.290  18.126  1.00 46.05      1tnf O  
ATOM   1638  HN  GLN B  27      24.957  43.006  21.186  1.00  0.00      1tnf H  
ATOM   1639 1HE2 GLN B  27      28.535  37.973  19.532  1.00  0.00      1tnf H  
ATOM   1640 2HE2 GLN B  27      27.307  37.202  18.510  1.00  0.00      1tnf H  
ATOM   1641  N   TRP B  28      26.769  40.320  23.410  1.00 18.43      1tnf N  
ATOM   1642  CA  TRP B  28      27.515  40.452  24.660  1.00 12.31      1tnf C  
ATOM   1643  C   TRP B  28      28.955  40.018  24.428  1.00 12.81      1tnf C  
ATOM   1644  O   TRP B  28      29.233  39.131  23.621  1.00 14.09      1tnf O  
ATOM   1645  CB  TRP B  28      26.860  39.600  25.726  1.00  8.46      1tnf C  
ATOM   1646  CG  TRP B  28      25.575  40.214  26.256  1.00  8.98      1tnf C  
ATOM   1647  CD1 TRP B  28      24.392  39.518  26.227  1.00  8.45      1tnf C  
ATOM   1648  CD2 TRP B  28      25.449  41.445  26.867  1.00  7.09      1tnf C  
ATOM   1649  CE2 TRP B  28      24.096  41.435  27.232  1.00  8.71      1tnf C  
ATOM   1650  CE3 TRP B  28      26.232  42.524  27.175  1.00  6.78      1tnf C  
ATOM   1651  NE1 TRP B  28      23.514  40.292  26.830  1.00  7.54      1tnf N  
ATOM   1652  CZ2 TRP B  28      23.511  42.507  27.914  1.00 10.77      1tnf C  
ATOM   1653  CZ3 TRP B  28      25.651  43.593  27.848  1.00 11.22      1tnf C  
ATOM   1654  CH2 TRP B  28      24.314  43.596  28.224  1.00  9.03      1tnf C  
ATOM   1655  HN  TRP B  28      26.416  39.394  23.170  1.00  0.00      1tnf H  
ATOM   1656  HE1 TRP B  28      22.532  40.058  26.972  1.00  0.00      1tnf H  
ATOM   1657  N   LEU B  29      29.904  40.593  25.152  1.00 15.05      1tnf N  
ATOM   1658  CA  LEU B  29      31.301  40.465  24.839  1.00 12.74      1tnf C  
ATOM   1659  C   LEU B  29      32.098  40.784  26.087  1.00 19.60      1tnf C  
ATOM   1660  O   LEU B  29      31.956  41.817  26.778  1.00 16.58      1tnf O  
ATOM   1661  CB  LEU B  29      31.637  41.481  23.784  1.00 11.61      1tnf C  
ATOM   1662  CG  LEU B  29      32.568  41.392  22.602  1.00 12.34      1tnf C  
ATOM   1663  CD1 LEU B  29      31.765  41.038  21.370  1.00 13.96      1tnf C  
ATOM   1664  CD2 LEU B  29      33.128  42.742  22.262  1.00  7.45      1tnf C  
ATOM   1665  HN  LEU B  29      29.633  41.148  25.963  1.00  0.00      1tnf H  
ATOM   1666  N   ASN B  30      32.966  39.803  26.329  1.00 24.53      1tnf N  
ATOM   1667  CA  ASN B  30      34.078  39.934  27.288  1.00 25.97      1tnf C  
ATOM   1668  C   ASN B  30      35.275  40.033  26.341  1.00 26.50      1tnf C  
ATOM   1669  O   ASN B  30      35.006  40.183  25.149  1.00 28.86      1tnf O  
ATOM   1670  CB  ASN B  30      34.240  38.694  28.192  1.00 27.87      1tnf C  
ATOM   1671  CG  ASN B  30      34.887  37.491  27.518  1.00 29.44      1tnf C  
ATOM   1672  ND2 ASN B  30      34.379  36.915  26.450  1.00 25.84      1tnf N  
ATOM   1673  OD1 ASN B  30      35.951  37.063  27.937  1.00 33.43      1tnf O  
ATOM   1674  HN  ASN B  30      32.856  38.921  25.828  1.00  0.00      1tnf H  
ATOM   1675 1HD2 ASN B  30      33.490  37.273  26.100  1.00  0.00      1tnf H  
ATOM   1676 2HD2 ASN B  30      34.812  36.109  25.999  1.00  0.00      1tnf H  
ATOM   1677  N   ARG B  31      36.570  39.905  26.686  1.00 30.82      1tnf N  
ATOM   1678  CA  ARG B  31      37.708  40.048  25.724  1.00 32.10      1tnf C  
ATOM   1679  C   ARG B  31      37.724  41.496  25.280  1.00 30.16      1tnf C  
ATOM   1680  O   ARG B  31      38.000  41.866  24.139  1.00 29.87      1tnf O  
ATOM   1681  CB  ARG B  31      37.571  39.176  24.428  1.00 34.14      1tnf C  
ATOM   1682  CG  ARG B  31      38.797  38.866  23.573  1.00 35.05      1tnf C  
ATOM   1683  CD  ARG B  31      39.736  37.885  24.281  1.00 39.11      1tnf C  
ATOM   1684  NE  ARG B  31      38.996  36.826  24.974  1.00 40.25      1tnf N  
ATOM   1685  CZ  ARG B  31      39.425  36.281  26.113  1.00 40.81      1tnf C  
ATOM   1686  NH1 ARG B  31      38.635  35.388  26.717  1.00 41.29      1tnf N1+
ATOM   1687  NH2 ARG B  31      40.628  36.588  26.625  1.00 39.84      1tnf N  
ATOM   1688  HN  ARG B  31      36.789  39.698  27.661  1.00  0.00      1tnf H  
ATOM   1689  HE  ARG B  31      38.120  36.494  24.570  1.00  0.00      1tnf H  
ATOM   1690 1HH1 ARG B  31      37.721  35.155  26.328  1.00  0.00      1tnf H  
ATOM   1691 2HH1 ARG B  31      38.963  34.971  27.588  1.00  0.00      1tnf H  
ATOM   1692 1HH2 ARG B  31      41.231  37.270  26.164  1.00  0.00      1tnf H  
ATOM   1693 2HH2 ARG B  31      40.956  36.171  27.496  1.00  0.00      1tnf H  
ATOM   1694  N   ARG B  32      37.491  42.258  26.338  1.00 29.40      1tnf N  
ATOM   1695  CA  ARG B  32      37.256  43.674  26.346  1.00 30.33      1tnf C  
ATOM   1696  C   ARG B  32      37.950  44.204  27.592  1.00 30.79      1tnf C  
ATOM   1697  O   ARG B  32      38.175  43.425  28.528  1.00 30.93      1tnf O  
ATOM   1698  CB  ARG B  32      35.779  43.908  26.441  1.00 30.12      1tnf C  
ATOM   1699  CG  ARG B  32      35.122  44.209  25.147  1.00 31.54      1tnf C  
ATOM   1700  CD  ARG B  32      35.530  45.608  24.867  1.00 33.91      1tnf C  
ATOM   1701  NE  ARG B  32      34.601  46.254  23.974  1.00 37.30      1tnf N  
ATOM   1702  CZ  ARG B  32      34.101  47.447  24.334  1.00 40.91      1tnf C  
ATOM   1703  NH1 ARG B  32      33.267  48.057  23.502  1.00 41.78      1tnf N1+
ATOM   1704  NH2 ARG B  32      34.385  48.042  25.516  1.00 39.14      1tnf N  
ATOM   1705  HN  ARG B  32      37.477  41.789  27.243  1.00  0.00      1tnf H  
ATOM   1706  HE  ARG B  32      34.331  45.817  23.093  1.00  0.00      1tnf H  
ATOM   1707 1HH1 ARG B  32      32.887  48.963  23.775  1.00  0.00      1tnf H  
ATOM   1708 2HH1 ARG B  32      33.053  47.609  22.611  1.00  0.00      1tnf H  
ATOM   1709 1HH2 ARG B  32      34.005  48.948  25.789  1.00  0.00      1tnf H  
ATOM   1710 2HH2 ARG B  32      35.026  47.573  26.156  1.00  0.00      1tnf H  
ATOM   1711  N   ALA B  33      38.213  45.514  27.679  1.00 30.69      1tnf N  
ATOM   1712  CA  ALA B  33      38.993  46.042  28.794  1.00 29.59      1tnf C  
ATOM   1713  C   ALA B  33      38.483  45.956  30.227  1.00 29.25      1tnf C  
ATOM   1714  O   ALA B  33      39.304  46.199  31.109  1.00 30.27      1tnf O  
ATOM   1715  CB  ALA B  33      39.308  47.497  28.616  1.00 29.76      1tnf C  
ATOM   1716  HN  ALA B  33      37.865  46.148  26.960  1.00  0.00      1tnf H  
ATOM   1717  N   ASN B  34      37.223  45.687  30.561  1.00 24.53      1tnf N  
ATOM   1718  CA  ASN B  34      36.833  45.582  31.964  1.00 23.70      1tnf C  
ATOM   1719  C   ASN B  34      35.687  44.582  32.112  1.00 22.04      1tnf C  
ATOM   1720  O   ASN B  34      34.694  44.756  32.824  1.00 19.76      1tnf O  
ATOM   1721  CB  ASN B  34      36.430  46.970  32.454  1.00 26.94      1tnf C  
ATOM   1722  CG  ASN B  34      37.539  47.695  33.196  1.00 27.00      1tnf C  
ATOM   1723  ND2 ASN B  34      38.470  48.429  32.589  1.00 24.01      1tnf N  
ATOM   1724  OD1 ASN B  34      37.605  47.595  34.421  1.00 32.86      1tnf O  
ATOM   1725  HN  ASN B  34      36.524  45.553  29.830  1.00  0.00      1tnf H  
ATOM   1726 1HD2 ASN B  34      39.215  48.916  33.087  1.00  0.00      1tnf H  
ATOM   1727 2HD2 ASN B  34      38.415  48.512  31.574  1.00  0.00      1tnf H  
ATOM   1728  N   ALA B  35      35.864  43.477  31.381  1.00 20.94      1tnf N  
ATOM   1729  CA  ALA B  35      34.853  42.457  31.208  1.00 15.76      1tnf C  
ATOM   1730  C   ALA B  35      35.554  41.186  31.647  1.00 17.16      1tnf C  
ATOM   1731  O   ALA B  35      36.627  40.890  31.133  1.00 21.31      1tnf O  
ATOM   1732  CB  ALA B  35      34.464  42.412  29.737  1.00  6.57      1tnf C  
ATOM   1733  HN  ALA B  35      36.764  43.345  30.919  1.00  0.00      1tnf H  
ATOM   1734  N   LEU B  36      35.002  40.505  32.645  1.00 15.47      1tnf N  
ATOM   1735  CA  LEU B  36      35.536  39.284  33.208  1.00 14.94      1tnf C  
ATOM   1736  C   LEU B  36      34.705  38.161  32.658  1.00 14.20      1tnf C  
ATOM   1737  O   LEU B  36      33.668  38.422  32.066  1.00 15.01      1tnf O  
ATOM   1738  CB  LEU B  36      35.395  39.229  34.728  1.00 16.51      1tnf C  
ATOM   1739  CG  LEU B  36      36.105  40.210  35.664  1.00 19.39      1tnf C  
ATOM   1740  CD1 LEU B  36      35.197  40.351  36.918  1.00 17.01      1tnf C  
ATOM   1741  CD2 LEU B  36      37.569  39.760  35.940  1.00 18.86      1tnf C  
ATOM   1742  HN  LEU B  36      34.137  40.870  33.044  1.00  0.00      1tnf H  
ATOM   1743  N   LEU B  37      35.126  36.935  32.967  1.00 15.97      1tnf N  
ATOM   1744  CA  LEU B  37      34.497  35.667  32.575  1.00 15.76      1tnf C  
ATOM   1745  C   LEU B  37      35.520  34.689  33.105  1.00 15.40      1tnf C  
ATOM   1746  O   LEU B  37      36.563  34.472  32.479  1.00 21.27      1tnf O  
ATOM   1747  CB  LEU B  37      34.442  35.446  31.083  1.00 12.51      1tnf C  
ATOM   1748  CG  LEU B  37      33.227  34.874  30.536  1.00 11.09      1tnf C  
ATOM   1749  CD1 LEU B  37      32.073  35.869  30.700  1.00 10.07      1tnf C  
ATOM   1750  CD2 LEU B  37      33.498  34.564  29.083  1.00 11.41      1tnf C  
ATOM   1751  HN  LEU B  37      35.972  36.871  33.534  1.00  0.00      1tnf H  
ATOM   1752  N   ALA B  38      35.328  34.134  34.276  1.00 12.09      1tnf N  
ATOM   1753  CA  ALA B  38      36.370  33.348  34.898  1.00 12.61      1tnf C  
ATOM   1754  C   ALA B  38      35.731  32.192  35.628  1.00 14.40      1tnf C  
ATOM   1755  O   ALA B  38      34.524  32.249  35.847  1.00 18.58      1tnf O  
ATOM   1756  CB  ALA B  38      37.151  34.249  35.872  1.00 13.11      1tnf C  
ATOM   1757  HN  ALA B  38      34.435  34.258  34.753  1.00  0.00      1tnf H  
ATOM   1758  N   ASN B  39      36.459  31.142  36.047  1.00 13.27      1tnf N  
ATOM   1759  CA  ASN B  39      35.854  30.001  36.746  1.00 10.46      1tnf C  
ATOM   1760  C   ASN B  39      34.677  29.248  36.112  1.00 11.21      1tnf C  
ATOM   1761  O   ASN B  39      33.625  29.035  36.724  1.00 13.75      1tnf O  
ATOM   1762  CB  ASN B  39      35.408  30.438  38.093  1.00 13.67      1tnf C  
ATOM   1763  CG  ASN B  39      36.554  30.839  38.972  1.00 17.59      1tnf C  
ATOM   1764  ND2 ASN B  39      37.285  31.938  38.928  1.00 13.00      1tnf N  
ATOM   1765  OD1 ASN B  39      36.781  30.070  39.864  1.00 20.07      1tnf O  
ATOM   1766  HN  ASN B  39      37.464  31.138  35.874  1.00  0.00      1tnf H  
ATOM   1767 1HD2 ASN B  39      38.065  32.211  39.526  1.00  0.00      1tnf H  
ATOM   1768 2HD2 ASN B  39      37.092  32.592  38.169  1.00  0.00      1tnf H  
ATOM   1769  N   GLY B  40      34.864  28.856  34.836  1.00 13.20      1tnf N  
ATOM   1770  CA  GLY B  40      33.932  28.030  34.099  1.00  7.79      1tnf C  
ATOM   1771  C   GLY B  40      32.612  28.658  33.672  1.00  8.14      1tnf C  
ATOM   1772  O   GLY B  40      31.780  27.913  33.125  1.00  9.63      1tnf O  
ATOM   1773  HN  GLY B  40      35.714  29.160  34.361  1.00  0.00      1tnf H  
ATOM   1774  N   VAL B  41      32.308  29.945  33.931  1.00  6.79      1tnf N  
ATOM   1775  CA  VAL B  41      31.111  30.463  33.286  1.00  8.12      1tnf C  
ATOM   1776  C   VAL B  41      31.593  30.648  31.829  1.00 12.27      1tnf C  
ATOM   1777  O   VAL B  41      32.808  30.762  31.550  1.00 13.23      1tnf O  
ATOM   1778  CB  VAL B  41      30.485  31.859  33.900  1.00  6.71      1tnf C  
ATOM   1779  CG1 VAL B  41      30.807  31.947  35.350  1.00  4.74      1tnf C  
ATOM   1780  CG2 VAL B  41      30.970  33.110  33.256  1.00  7.11      1tnf C  
ATOM   1781  HN  VAL B  41      32.884  30.523  34.544  1.00  0.00      1tnf H  
ATOM   1782  N   GLU B  42      30.683  30.521  30.854  1.00 14.73      1tnf N  
ATOM   1783  CA  GLU B  42      31.020  30.754  29.461  1.00 17.33      1tnf C  
ATOM   1784  C   GLU B  42      29.759  31.291  28.815  1.00 16.22      1tnf C  
ATOM   1785  O   GLU B  42      28.613  30.913  29.094  1.00 18.68      1tnf O  
ATOM   1786  CB  GLU B  42      31.513  29.451  28.736  1.00 18.17      1tnf C  
ATOM   1787  CG  GLU B  42      30.533  28.281  28.641  1.00 25.20      1tnf C  
ATOM   1788  CD  GLU B  42      31.065  26.921  28.174  1.00 28.17      1tnf C  
ATOM   1789  OE1 GLU B  42      30.582  26.381  27.158  1.00 31.60      1tnf O  
ATOM   1790  OE2 GLU B  42      31.941  26.378  28.857  1.00 28.73      1tnf O1-
ATOM   1791  HN  GLU B  42      29.729  30.254  31.096  1.00  0.00      1tnf H  
ATOM   1792  N   LEU B  43      30.005  32.310  28.027  1.00 16.15      1tnf N  
ATOM   1793  CA  LEU B  43      28.954  32.927  27.252  1.00 18.19      1tnf C  
ATOM   1794  C   LEU B  43      28.828  32.062  25.992  1.00 18.46      1tnf C  
ATOM   1795  O   LEU B  43      29.764  32.021  25.211  1.00 12.07      1tnf O  
ATOM   1796  CB  LEU B  43      29.431  34.381  27.040  1.00 18.78      1tnf C  
ATOM   1797  CG  LEU B  43      29.408  35.126  25.715  1.00 16.69      1tnf C  
ATOM   1798  CD1 LEU B  43      28.035  35.721  25.423  1.00 15.07      1tnf C  
ATOM   1799  CD2 LEU B  43      30.522  36.187  25.801  1.00 13.56      1tnf C  
ATOM   1800  HN  LEU B  43      30.956  32.673  27.960  1.00  0.00      1tnf H  
ATOM   1801  N   ARG B  44      27.777  31.252  25.836  1.00 25.10      1tnf N  
ATOM   1802  CA  ARG B  44      27.689  30.423  24.648  1.00 31.63      1tnf C  
ATOM   1803  C   ARG B  44      26.765  31.065  23.625  1.00 33.68      1tnf C  
ATOM   1804  O   ARG B  44      27.277  31.920  22.885  1.00 36.91      1tnf O  
ATOM   1805  CB  ARG B  44      27.187  28.997  24.950  1.00 37.63      1tnf C  
ATOM   1806  CG  ARG B  44      28.119  27.816  24.540  1.00 45.33      1tnf C  
ATOM   1807  CD  ARG B  44      28.411  27.512  23.017  1.00 53.94      1tnf C  
ATOM   1808  NE  ARG B  44      29.315  26.333  22.829  1.00 60.47      1tnf N  
ATOM   1809  CZ  ARG B  44      30.276  26.183  21.863  1.00 61.27      1tnf C  
ATOM   1810  NH1 ARG B  44      31.057  25.086  21.826  1.00 59.75      1tnf N1+
ATOM   1811  NH2 ARG B  44      30.491  27.107  20.912  1.00 63.57      1tnf N  
ATOM   1812  HN  ARG B  44      27.044  31.217  26.544  1.00  0.00      1tnf H  
ATOM   1813  HE  ARG B  44      29.204  25.562  23.488  1.00  0.00      1tnf H  
ATOM   1814 1HH1 ARG B  44      31.772  24.974  21.107  1.00  0.00      1tnf H  
ATOM   1815 2HH1 ARG B  44      30.894  24.384  22.548  1.00  0.00      1tnf H  
ATOM   1816 1HH2 ARG B  44      31.206  26.995  20.193  1.00  0.00      1tnf H  
ATOM   1817 2HH2 ARG B  44      29.900  27.938  20.940  1.00  0.00      1tnf H  
ATOM   1818  N   ASP B  45      25.438  30.876  23.482  1.00 30.35      1tnf N  
ATOM   1819  CA  ASP B  45      24.820  31.474  22.287  1.00 28.30      1tnf C  
ATOM   1820  C   ASP B  45      24.245  32.854  22.515  1.00 24.43      1tnf C  
ATOM   1821  O   ASP B  45      23.099  33.147  22.207  1.00 23.66      1tnf O  
ATOM   1822  CB  ASP B  45      23.780  30.478  21.781  1.00 32.66      1tnf C  
ATOM   1823  CG  ASP B  45      24.459  29.127  21.502  1.00 34.80      1tnf C  
ATOM   1824  OD1 ASP B  45      25.612  29.116  21.020  1.00 31.68      1tnf O  
ATOM   1825  OD2 ASP B  45      23.828  28.099  21.804  1.00 34.92      1tnf O1-
ATOM   1826  HN  ASP B  45      24.893  30.348  24.164  1.00  0.00      1tnf H  
ATOM   1827  N   ASN B  46      25.173  33.693  23.008  1.00 19.59      1tnf N  
ATOM   1828  CA  ASN B  46      24.959  35.007  23.595  1.00 15.34      1tnf C  
ATOM   1829  C   ASN B  46      24.386  34.997  25.038  1.00 18.65      1tnf C  
ATOM   1830  O   ASN B  46      24.011  36.027  25.626  1.00 20.16      1tnf O  
ATOM   1831  CB  ASN B  46      24.049  35.800  22.704  1.00 11.21      1tnf C  
ATOM   1832  CG  ASN B  46      24.334  37.260  22.797  1.00  5.90      1tnf C  
ATOM   1833  ND2 ASN B  46      23.237  37.952  22.696  1.00  2.00      1tnf N  
ATOM   1834  OD1 ASN B  46      25.468  37.716  22.910  1.00  7.24      1tnf O  
ATOM   1835  HN  ASN B  46      26.140  33.371  22.965  1.00  0.00      1tnf H  
ATOM   1836 1HD2 ASN B  46      23.432  38.951  22.760  1.00  0.00      1tnf H  
ATOM   1837 2HD2 ASN B  46      22.295  37.573  22.602  1.00  0.00      1tnf H  
ATOM   1838  N   GLN B  47      24.365  33.804  25.667  1.00 17.97      1tnf N  
ATOM   1839  CA  GLN B  47      23.784  33.592  26.993  1.00 15.89      1tnf C  
ATOM   1840  C   GLN B  47      24.887  33.176  27.922  1.00 14.78      1tnf C  
ATOM   1841  O   GLN B  47      25.962  32.791  27.444  1.00 15.12      1tnf O  
ATOM   1842  CB  GLN B  47      22.772  32.470  26.988  1.00 17.71      1tnf C  
ATOM   1843  CG  GLN B  47      21.600  32.895  26.145  1.00 19.80      1tnf C  
ATOM   1844  CD  GLN B  47      20.653  31.799  25.698  1.00 19.26      1tnf C  
ATOM   1845  NE2 GLN B  47      19.425  32.179  25.418  1.00 21.02      1tnf N  
ATOM   1846  OE1 GLN B  47      20.997  30.635  25.555  1.00 18.69      1tnf O  
ATOM   1847  HN  GLN B  47      24.778  33.003  25.190  1.00  0.00      1tnf H  
ATOM   1848 1HE2 GLN B  47      19.138  33.150  25.537  1.00  0.00      1tnf H  
ATOM   1849 2HE2 GLN B  47      18.788  31.442  25.117  1.00  0.00      1tnf H  
ATOM   1850  N   LEU B  48      24.601  33.199  29.223  1.00 13.73      1tnf N  
ATOM   1851  CA  LEU B  48      25.593  32.818  30.187  1.00 12.31      1tnf C  
ATOM   1852  C   LEU B  48      25.275  31.470  30.751  1.00 14.33      1tnf C  
ATOM   1853  O   LEU B  48      24.156  31.321  31.214  1.00 10.95      1tnf O  
ATOM   1854  CB  LEU B  48      25.667  33.827  31.290  1.00 12.46      1tnf C  
ATOM   1855  CG  LEU B  48      26.398  35.137  30.888  1.00 18.62      1tnf C  
ATOM   1856  CD1 LEU B  48      26.194  36.186  32.004  1.00 18.71      1tnf C  
ATOM   1857  CD2 LEU B  48      27.884  34.854  30.571  1.00 15.01      1tnf C  
ATOM   1858  HN  LEU B  48      23.674  33.488  29.535  1.00  0.00      1tnf H  
ATOM   1859  N   VAL B  49      26.224  30.509  30.618  1.00 16.55      1tnf N  
ATOM   1860  CA  VAL B  49      26.093  29.159  31.185  1.00 16.23      1tnf C  
ATOM   1861  C   VAL B  49      26.685  29.046  32.596  1.00 15.24      1tnf C  
ATOM   1862  O   VAL B  49      27.844  29.393  32.851  1.00 16.28      1tnf O  
ATOM   1863  CB  VAL B  49      26.762  28.099  30.275  1.00 16.73      1tnf C  
ATOM   1864  CG1 VAL B  49      26.357  26.722  30.807  1.00 17.92      1tnf C  
ATOM   1865  CG2 VAL B  49      26.378  28.301  28.825  1.00 11.34      1tnf C  
ATOM   1866  HN  VAL B  49      27.072  30.735  30.098  1.00  0.00      1tnf H  
ATOM   1867  N   VAL B  50      25.870  28.592  33.533  1.00 16.62      1tnf N  
ATOM   1868  CA  VAL B  50      26.280  28.528  34.923  1.00 22.36      1tnf C  
ATOM   1869  C   VAL B  50      27.010  27.253  35.340  1.00 24.15      1tnf C  
ATOM   1870  O   VAL B  50      26.436  26.157  35.254  1.00 23.60      1tnf O  
ATOM   1871  CB  VAL B  50      25.038  28.759  35.804  1.00 22.48      1tnf C  
ATOM   1872  CG1 VAL B  50      25.031  28.016  37.141  1.00 25.05      1tnf C  
ATOM   1873  CG2 VAL B  50      25.053  30.252  36.071  1.00 25.88      1tnf C  
ATOM   1874  HN  VAL B  50      24.934  28.280  33.273  1.00  0.00      1tnf H  
ATOM   1875  N   PRO B  51      28.242  27.427  35.859  1.00 23.77      1tnf N  
ATOM   1876  CA  PRO B  51      29.176  26.349  36.094  1.00 22.62      1tnf C  
ATOM   1877  C   PRO B  51      28.727  25.462  37.248  1.00 26.06      1tnf C  
ATOM   1878  O   PRO B  51      28.442  24.294  36.982  1.00 28.52      1tnf O  
ATOM   1879  CB  PRO B  51      30.479  27.082  36.306  1.00 23.02      1tnf C  
ATOM   1880  CG  PRO B  51      30.071  28.358  36.996  1.00 23.72      1tnf C  
ATOM   1881  CD  PRO B  51      28.810  28.729  36.244  1.00 23.66      1tnf C  
ATOM   1882  N   SER B  52      28.585  25.952  38.494  1.00 26.69      1tnf N  
ATOM   1883  CA  SER B  52      28.221  25.155  39.667  1.00 23.81      1tnf C  
ATOM   1884  C   SER B  52      26.910  25.568  40.307  1.00 20.50      1tnf C  
ATOM   1885  O   SER B  52      26.431  26.681  40.071  1.00 17.64      1tnf O  
ATOM   1886  CB  SER B  52      29.314  25.295  40.705  1.00 26.40      1tnf C  
ATOM   1887  OG  SER B  52      29.615  26.660  40.987  1.00 27.61      1tnf O  
ATOM   1888  HN  SER B  52      28.742  26.950  38.631  1.00  0.00      1tnf H  
ATOM   1889  HG  SER B  52      30.301  26.748  41.638  1.00  0.00      1tnf H  
ATOM   1890  N   GLU B  53      26.358  24.726  41.178  1.00 17.57      1tnf N  
ATOM   1891  CA  GLU B  53      25.137  25.129  41.846  1.00 22.06      1tnf C  
ATOM   1892  C   GLU B  53      25.582  26.160  42.868  1.00 20.65      1tnf C  
ATOM   1893  O   GLU B  53      26.640  25.959  43.478  1.00 26.44      1tnf O  
ATOM   1894  CB  GLU B  53      24.466  23.953  42.556  1.00 26.74      1tnf C  
ATOM   1895  CG  GLU B  53      22.980  23.680  42.195  1.00 31.48      1tnf C  
ATOM   1896  CD  GLU B  53      22.246  22.786  43.224  1.00 35.83      1tnf C  
ATOM   1897  OE1 GLU B  53      21.677  23.364  44.172  1.00 37.57      1tnf O  
ATOM   1898  OE2 GLU B  53      22.238  21.539  43.090  1.00 33.75      1tnf O1-
ATOM   1899  HN  GLU B  53      26.784  23.819  41.370  1.00  0.00      1tnf H  
ATOM   1900  N   GLY B  54      24.835  27.250  43.031  1.00 17.97      1tnf N  
ATOM   1901  CA  GLY B  54      25.202  28.305  43.948  1.00 15.63      1tnf C  
ATOM   1902  C   GLY B  54      24.098  29.335  44.017  1.00 17.64      1tnf C  
ATOM   1903  O   GLY B  54      23.001  29.208  43.426  1.00 20.48      1tnf O  
ATOM   1904  HN  GLY B  54      23.975  27.344  42.491  1.00  0.00      1tnf H  
ATOM   1905  N   LEU B  55      24.372  30.401  44.724  1.00 15.60      1tnf N  
ATOM   1906  CA  LEU B  55      23.351  31.422  44.842  1.00 16.80      1tnf C  
ATOM   1907  C   LEU B  55      24.015  32.538  44.052  1.00 13.18      1tnf C  
ATOM   1908  O   LEU B  55      25.198  32.758  44.170  1.00 11.90      1tnf O  
ATOM   1909  CB  LEU B  55      23.177  31.626  46.369  1.00 17.29      1tnf C  
ATOM   1910  CG  LEU B  55      21.798  31.852  47.022  1.00 18.42      1tnf C  
ATOM   1911  CD1 LEU B  55      20.714  31.272  46.208  1.00 15.23      1tnf C  
ATOM   1912  CD2 LEU B  55      21.811  31.250  48.433  1.00 18.81      1tnf C  
ATOM   1913  HN  LEU B  55      25.278  30.510  45.179  1.00  0.00      1tnf H  
ATOM   1914  N   TYR B  56      23.413  33.218  43.111  1.00 13.24      1tnf N  
ATOM   1915  CA  TYR B  56      24.137  34.168  42.294  1.00 11.89      1tnf C  
ATOM   1916  C   TYR B  56      23.395  35.507  42.277  1.00 12.07      1tnf C  
ATOM   1917  O   TYR B  56      22.157  35.571  42.265  1.00 12.96      1tnf O  
ATOM   1918  CB  TYR B  56      24.263  33.650  40.853  1.00 10.09      1tnf C  
ATOM   1919  CG  TYR B  56      25.143  32.462  40.461  1.00 10.19      1tnf C  
ATOM   1920  CD1 TYR B  56      24.678  31.166  40.564  1.00 11.05      1tnf C  
ATOM   1921  CD2 TYR B  56      26.403  32.656  39.915  1.00 11.75      1tnf C  
ATOM   1922  CE1 TYR B  56      25.445  30.086  40.125  1.00 10.61      1tnf C  
ATOM   1923  CE2 TYR B  56      27.170  31.584  39.483  1.00 10.02      1tnf C  
ATOM   1924  CZ  TYR B  56      26.688  30.298  39.587  1.00  9.72      1tnf C  
ATOM   1925  OH  TYR B  56      27.413  29.207  39.156  1.00  9.95      1tnf O  
ATOM   1926  HN  TYR B  56      22.416  33.076  42.950  1.00  0.00      1tnf H  
ATOM   1927  HH  TYR B  56      27.081  28.320  39.228  1.00  0.00      1tnf H  
ATOM   1928  N   LEU B  57      24.191  36.577  42.376  1.00 11.20      1tnf N  
ATOM   1929  CA  LEU B  57      23.732  37.925  42.148  1.00 12.85      1tnf C  
ATOM   1930  C   LEU B  57      23.820  38.018  40.632  1.00 14.38      1tnf C  
ATOM   1931  O   LEU B  57      24.903  37.811  40.062  1.00 14.95      1tnf O  
ATOM   1932  CB  LEU B  57      24.676  38.993  42.797  1.00 11.78      1tnf C  
ATOM   1933  CG  LEU B  57      24.810  40.460  42.226  1.00  7.67      1tnf C  
ATOM   1934  CD1 LEU B  57      23.475  41.193  42.244  1.00  9.70      1tnf C  
ATOM   1935  CD2 LEU B  57      25.812  41.219  43.036  1.00  2.00      1tnf C  
ATOM   1936  HN  LEU B  57      25.170  36.433  42.625  1.00  0.00      1tnf H  
ATOM   1937  N   ILE B  58      22.685  38.263  39.979  1.00 18.67      1tnf N  
ATOM   1938  CA  ILE B  58      22.616  38.488  38.509  1.00 15.27      1tnf C  
ATOM   1939  C   ILE B  58      22.190  39.952  38.285  1.00 15.33      1tnf C  
ATOM   1940  O   ILE B  58      21.124  40.331  38.779  1.00 18.41      1tnf O  
ATOM   1941  CB  ILE B  58      21.586  37.602  37.847  1.00  8.56      1tnf C  
ATOM   1942  CG1 ILE B  58      21.660  36.136  38.331  1.00  7.45      1tnf C  
ATOM   1943  CG2 ILE B  58      21.805  37.836  36.367  1.00  9.20      1tnf C  
ATOM   1944  CD1 ILE B  58      20.427  35.247  38.155  1.00  3.27      1tnf C  
ATOM   1945  HN  ILE B  58      21.818  38.298  40.514  1.00  0.00      1tnf H  
ATOM   1946  N   TYR B  59      22.961  40.801  37.605  1.00 12.59      1tnf N  
ATOM   1947  CA  TYR B  59      22.571  42.181  37.407  1.00  9.72      1tnf C  
ATOM   1948  C   TYR B  59      22.623  42.609  35.924  1.00  8.31      1tnf C  
ATOM   1949  O   TYR B  59      23.167  41.853  35.110  1.00  7.16      1tnf O  
ATOM   1950  CB  TYR B  59      23.480  43.016  38.316  1.00  6.20      1tnf C  
ATOM   1951  CG  TYR B  59      24.962  42.965  38.012  1.00  4.91      1tnf C  
ATOM   1952  CD1 TYR B  59      25.499  43.941  37.214  1.00  2.87      1tnf C  
ATOM   1953  CD2 TYR B  59      25.753  41.956  38.505  1.00  6.21      1tnf C  
ATOM   1954  CE1 TYR B  59      26.811  43.904  36.897  1.00  5.74      1tnf C  
ATOM   1955  CE2 TYR B  59      27.089  41.919  38.198  1.00  3.69      1tnf C  
ATOM   1956  CZ  TYR B  59      27.603  42.893  37.389  1.00  7.64      1tnf C  
ATOM   1957  OH  TYR B  59      28.941  42.845  36.995  1.00 10.96      1tnf O  
ATOM   1958  HN  TYR B  59      23.844  40.471  37.216  1.00  0.00      1tnf H  
ATOM   1959  HH  TYR B  59      29.298  43.522  36.433  1.00  0.00      1tnf H  
ATOM   1960  N   SER B  60      22.138  43.785  35.504  1.00  6.60      1tnf N  
ATOM   1961  CA  SER B  60      22.071  44.150  34.095  1.00  6.38      1tnf C  
ATOM   1962  C   SER B  60      21.675  45.604  33.840  1.00  9.36      1tnf C  
ATOM   1963  O   SER B  60      20.647  46.082  34.372  1.00  6.50      1tnf O  
ATOM   1964  CB  SER B  60      21.051  43.236  33.416  1.00  9.01      1tnf C  
ATOM   1965  OG  SER B  60      21.077  43.105  32.007  1.00 15.57      1tnf O  
ATOM   1966  HN  SER B  60      21.802  44.452  36.199  1.00  0.00      1tnf H  
ATOM   1967  HG  SER B  60      20.443  42.537  31.585  1.00  0.00      1tnf H  
ATOM   1968  N   GLN B  61      22.440  46.313  32.982  1.00 10.35      1tnf N  
ATOM   1969  CA  GLN B  61      22.032  47.655  32.562  1.00 11.05      1tnf C  
ATOM   1970  C   GLN B  61      22.178  47.822  31.051  1.00 13.53      1tnf C  
ATOM   1971  O   GLN B  61      23.116  47.318  30.435  1.00 11.61      1tnf O  
ATOM   1972  CB  GLN B  61      22.856  48.739  33.248  1.00  9.86      1tnf C  
ATOM   1973  CG  GLN B  61      22.600  50.204  32.860  1.00 11.46      1tnf C  
ATOM   1974  CD  GLN B  61      23.593  51.171  33.489  1.00 14.58      1tnf C  
ATOM   1975  NE2 GLN B  61      23.214  51.785  34.589  1.00 17.69      1tnf N  
ATOM   1976  OE1 GLN B  61      24.753  51.337  33.102  1.00 14.11      1tnf O  
ATOM   1977  HN  GLN B  61      23.307  45.911  32.625  1.00  0.00      1tnf H  
ATOM   1978 1HE2 GLN B  61      23.879  52.433  35.011  1.00  0.00      1tnf H  
ATOM   1979 2HE2 GLN B  61      22.255  51.648  34.909  1.00  0.00      1tnf H  
ATOM   1980  N   VAL B  62      21.157  48.516  30.517  1.00 13.26      1tnf N  
ATOM   1981  CA  VAL B  62      20.981  48.923  29.129  1.00  7.63      1tnf C  
ATOM   1982  C   VAL B  62      20.526  50.379  29.090  1.00 10.24      1tnf C  
ATOM   1983  O   VAL B  62      19.734  50.841  29.928  1.00 11.35      1tnf O  
ATOM   1984  CB  VAL B  62      19.925  48.087  28.383  1.00  7.20      1tnf C  
ATOM   1985  CG1 VAL B  62      20.477  46.670  28.180  1.00  8.40      1tnf C  
ATOM   1986  CG2 VAL B  62      18.601  48.106  29.112  1.00  4.13      1tnf C  
ATOM   1987  HN  VAL B  62      20.416  48.791  31.162  1.00  0.00      1tnf H  
ATOM   1988  N   LEU B  63      21.188  51.129  28.213  1.00 11.49      1tnf N  
ATOM   1989  CA  LEU B  63      20.884  52.508  27.921  1.00  9.94      1tnf C  
ATOM   1990  C   LEU B  63      20.188  52.498  26.549  1.00 12.91      1tnf C  
ATOM   1991  O   LEU B  63      20.480  51.707  25.629  1.00 14.54      1tnf O  
ATOM   1992  CB  LEU B  63      22.173  53.358  27.867  1.00  6.09      1tnf C  
ATOM   1993  CG  LEU B  63      22.241  54.669  28.756  1.00  8.11      1tnf C  
ATOM   1994  CD1 LEU B  63      23.265  55.655  28.232  1.00  2.13      1tnf C  
ATOM   1995  CD2 LEU B  63      20.892  55.413  28.729  1.00  5.89      1tnf C  
ATOM   1996  HN  LEU B  63      21.965  50.698  27.712  1.00  0.00      1tnf H  
ATOM   1997  N   PHE B  64      19.213  53.382  26.433  1.00 11.15      1tnf N  
ATOM   1998  CA  PHE B  64      18.459  53.543  25.218  1.00 12.05      1tnf C  
ATOM   1999  C   PHE B  64      18.468  55.035  24.946  1.00 16.16      1tnf C  
ATOM   2000  O   PHE B  64      18.333  55.824  25.888  1.00 15.85      1tnf O  
ATOM   2001  CB  PHE B  64      17.002  53.124  25.394  1.00 10.73      1tnf C  
ATOM   2002  CG  PHE B  64      16.659  51.653  25.581  1.00  7.22      1tnf C  
ATOM   2003  CD1 PHE B  64      16.402  51.156  26.835  1.00  5.66      1tnf C  
ATOM   2004  CD2 PHE B  64      16.551  50.825  24.479  1.00  9.18      1tnf C  
ATOM   2005  CE1 PHE B  64      16.028  49.826  26.982  1.00 11.58      1tnf C  
ATOM   2006  CE2 PHE B  64      16.176  49.492  24.638  1.00 12.29      1tnf C  
ATOM   2007  CZ  PHE B  64      15.906  48.978  25.891  1.00 10.89      1tnf C  
ATOM   2008  HN  PHE B  64      18.986  53.972  27.234  1.00  0.00      1tnf H  
ATOM   2009  N   LYS B  65      18.670  55.482  23.712  1.00 18.31      1tnf N  
ATOM   2010  CA  LYS B  65      18.540  56.883  23.375  1.00 19.66      1tnf C  
ATOM   2011  C   LYS B  65      17.749  56.901  22.085  1.00 19.17      1tnf C  
ATOM   2012  O   LYS B  65      17.799  55.989  21.260  1.00 21.92      1tnf O  
ATOM   2013  CB  LYS B  65      19.916  57.614  23.158  1.00 22.82      1tnf C  
ATOM   2014  CG  LYS B  65      20.530  57.816  21.786  1.00 29.01      1tnf C  
ATOM   2015  CD  LYS B  65      21.107  56.466  21.298  1.00 37.22      1tnf C  
ATOM   2016  CE  LYS B  65      21.549  56.355  19.798  1.00 39.97      1tnf C  
ATOM   2017  NZ  LYS B  65      22.532  55.281  19.563  1.00 40.31      1tnf N1+
ATOM   2018  HN  LYS B  65      18.924  54.818  22.980  1.00  0.00      1tnf H  
ATOM   2019  HZ1 LYS B  65      22.820  55.209  18.587  1.00  0.00      1tnf H  
ATOM   2020  HZ2 LYS B  65      22.182  54.386  19.906  1.00  0.00      1tnf H  
ATOM   2021  HZ3 LYS B  65      23.342  55.389  20.174  1.00  0.00      1tnf H  
ATOM   2022  N   GLY B  66      16.958  57.929  21.925  1.00 18.29      1tnf N  
ATOM   2023  CA  GLY B  66      16.221  58.112  20.717  1.00 20.85      1tnf C  
ATOM   2024  C   GLY B  66      16.029  59.585  20.619  1.00 22.55      1tnf C  
ATOM   2025  O   GLY B  66      15.799  60.238  21.631  1.00 25.72      1tnf O  
ATOM   2026  HN  GLY B  66      16.866  58.612  22.677  1.00  0.00      1tnf H  
ATOM   2027  N   GLN B  67      16.279  60.181  19.471  1.00 24.55      1tnf N  
ATOM   2028  CA  GLN B  67      15.918  61.579  19.330  1.00 24.86      1tnf C  
ATOM   2029  C   GLN B  67      14.457  61.578  18.918  1.00 22.80      1tnf C  
ATOM   2030  O   GLN B  67      14.004  60.592  18.326  1.00 24.31      1tnf O  
ATOM   2031  CB  GLN B  67      16.654  62.314  18.237  1.00 29.65      1tnf C  
ATOM   2032  CG  GLN B  67      17.704  61.662  17.345  1.00 33.78      1tnf C  
ATOM   2033  CD  GLN B  67      18.538  62.819  16.789  1.00 39.72      1tnf C  
ATOM   2034  NE2 GLN B  67      18.925  62.720  15.508  1.00 39.89      1tnf N  
ATOM   2035  OE1 GLN B  67      18.822  63.808  17.506  1.00 39.32      1tnf O  
ATOM   2036  HN  GLN B  67      16.715  59.673  18.701  1.00  0.00      1tnf H  
ATOM   2037 1HE2 GLN B  67      19.481  63.491  15.138  1.00  0.00      1tnf H  
ATOM   2038 2HE2 GLN B  67      18.694  61.916  14.925  1.00  0.00      1tnf H  
ATOM   2039  N   GLY B  68      13.716  62.644  19.200  1.00 17.75      1tnf N  
ATOM   2040  CA  GLY B  68      12.322  62.678  18.852  1.00 15.74      1tnf C  
ATOM   2041  C   GLY B  68      11.478  61.581  19.490  1.00 13.82      1tnf C  
ATOM   2042  O   GLY B  68      11.948  60.525  19.871  1.00 11.86      1tnf O  
ATOM   2043  HN  GLY B  68      14.140  63.445  19.668  1.00  0.00      1tnf H  
ATOM   2044  N   CYS B  69      10.202  61.890  19.636  1.00 18.81      1tnf N  
ATOM   2045  CA  CYS B  69       9.207  60.985  20.169  1.00 23.05      1tnf C  
ATOM   2046  C   CYS B  69       8.169  60.564  19.150  1.00 29.14      1tnf C  
ATOM   2047  O   CYS B  69       7.277  61.361  18.767  1.00 32.05      1tnf O  
ATOM   2048  CB  CYS B  69       8.456  61.580  21.351  1.00 18.69      1tnf C  
ATOM   2049  SG  CYS B  69       9.331  60.950  22.777  1.00 22.83      1tnf S  
ATOM   2050  HN  CYS B  69       9.900  62.823  19.356  1.00  0.00      1tnf H  
ATOM   2051  N   PRO B  70       8.315  59.313  18.684  1.00 31.65      1tnf N  
ATOM   2052  CA  PRO B  70       7.505  58.738  17.618  1.00 33.99      1tnf C  
ATOM   2053  C   PRO B  70       6.057  58.604  18.087  1.00 37.00      1tnf C  
ATOM   2054  O   PRO B  70       5.743  58.793  19.267  1.00 37.27      1tnf O  
ATOM   2055  CB  PRO B  70       8.187  57.418  17.346  1.00 35.18      1tnf C  
ATOM   2056  CG  PRO B  70       9.577  57.524  17.990  1.00 34.91      1tnf C  
ATOM   2057  CD  PRO B  70       9.227  58.313  19.228  1.00 32.65      1tnf C  
ATOM   2058  N   SER B  71       5.161  58.269  17.168  1.00 40.11      1tnf N  
ATOM   2059  CA  SER B  71       3.756  58.093  17.529  1.00 43.71      1tnf C  
ATOM   2060  C   SER B  71       3.551  56.794  18.323  1.00 44.26      1tnf C  
ATOM   2061  O   SER B  71       4.375  55.863  18.497  1.00 37.68      1tnf O  
ATOM   2062  CB  SER B  71       2.873  58.106  16.211  1.00 44.21      1tnf C  
ATOM   2063  OG  SER B  71       1.446  58.138  16.343  1.00 41.37      1tnf O  
ATOM   2064  HN  SER B  71       5.455  58.133  16.201  1.00  0.00      1tnf H  
ATOM   2065  HG  SER B  71       0.917  58.146  15.554  1.00  0.00      1tnf H  
ATOM   2066  N   THR B  72       2.276  56.869  18.709  1.00 47.78      1tnf N  
ATOM   2067  CA  THR B  72       1.574  55.907  19.550  1.00 50.20      1tnf C  
ATOM   2068  C   THR B  72       2.447  55.561  20.789  1.00 47.46      1tnf C  
ATOM   2069  O   THR B  72       2.799  56.491  21.565  1.00 48.20      1tnf O  
ATOM   2070  CB  THR B  72       1.184  54.679  18.617  1.00 51.04      1tnf C  
ATOM   2071  CG2 THR B  72       0.137  53.845  19.361  1.00 51.95      1tnf C  
ATOM   2072  OG1 THR B  72       0.580  55.103  17.372  1.00 49.23      1tnf O  
ATOM   2073  HN  THR B  72       1.742  57.675  18.385  1.00  0.00      1tnf H  
ATOM   2074  HG1 THR B  72       0.347  54.370  16.815  1.00  0.00      1tnf H  
ATOM   2075  N   HIS B  73       2.809  54.324  21.107  1.00 41.99      1tnf N  
ATOM   2076  CA  HIS B  73       3.652  54.147  22.260  1.00 37.11      1tnf C  
ATOM   2077  C   HIS B  73       4.638  53.047  22.039  1.00 32.94      1tnf C  
ATOM   2078  O   HIS B  73       4.301  51.886  21.787  1.00 32.39      1tnf O  
ATOM   2079  CB  HIS B  73       2.823  53.851  23.503  1.00 39.60      1tnf C  
ATOM   2080  CG  HIS B  73       3.039  54.927  24.573  1.00 40.36      1tnf C  
ATOM   2081  CD2 HIS B  73       2.872  54.736  25.926  1.00 41.49      1tnf C  
ATOM   2082  ND1 HIS B  73       3.343  56.214  24.399  1.00 42.20      1tnf N  
ATOM   2083  CE1 HIS B  73       3.339  56.782  25.586  1.00 41.08      1tnf C  
ATOM   2084  NE2 HIS B  73       3.060  55.896  26.495  1.00 41.01      1tnf N  
ATOM   2085  HN  HIS B  73       2.500  53.526  20.553  1.00  0.00      1tnf H  
ATOM   2086  HD1 HIS B  73       3.542  56.673  23.510  1.00  0.00      1tnf H  
ATOM   2087  HE2 HIS B  73       2.998  56.078  27.497  1.00  0.00      1tnf H  
ATOM   2088  N   VAL B  74       5.835  53.613  22.112  1.00 26.99      1tnf N  
ATOM   2089  CA  VAL B  74       7.049  52.872  21.996  1.00 26.72      1tnf C  
ATOM   2090  C   VAL B  74       7.193  51.801  23.080  1.00 26.31      1tnf C  
ATOM   2091  O   VAL B  74       7.254  50.656  22.649  1.00 29.87      1tnf O  
ATOM   2092  CB  VAL B  74       8.280  53.862  21.997  1.00 29.50      1tnf C  
ATOM   2093  CG1 VAL B  74       9.573  53.038  21.964  1.00 29.26      1tnf C  
ATOM   2094  CG2 VAL B  74       8.328  54.762  20.733  1.00 27.76      1tnf C  
ATOM   2095  HN  VAL B  74       5.890  54.621  22.257  1.00  0.00      1tnf H  
ATOM   2096  N   LEU B  75       7.177  52.006  24.405  1.00 19.98      1tnf N  
ATOM   2097  CA  LEU B  75       7.476  50.908  25.351  1.00 15.20      1tnf C  
ATOM   2098  C   LEU B  75       8.809  50.158  25.082  1.00 16.24      1tnf C  
ATOM   2099  O   LEU B  75       9.032  49.471  24.087  1.00 16.35      1tnf O  
ATOM   2100  CB  LEU B  75       6.329  49.880  25.399  1.00 13.11      1tnf C  
ATOM   2101  CG  LEU B  75       5.024  50.310  26.072  1.00 14.81      1tnf C  
ATOM   2102  CD1 LEU B  75       3.873  49.303  25.947  1.00  9.85      1tnf C  
ATOM   2103  CD2 LEU B  75       5.387  50.519  27.505  1.00 15.41      1tnf C  
ATOM   2104  HN  LEU B  75       6.955  52.934  24.767  1.00  0.00      1tnf H  
ATOM   2105  N   LEU B  76       9.798  50.344  25.944  1.00 12.26      1tnf N  
ATOM   2106  CA  LEU B  76      11.080  49.691  25.833  1.00 12.20      1tnf C  
ATOM   2107  C   LEU B  76      11.137  48.688  27.009  1.00 16.23      1tnf C  
ATOM   2108  O   LEU B  76      10.713  49.018  28.148  1.00 15.72      1tnf O  
ATOM   2109  CB  LEU B  76      12.186  50.684  26.008  1.00 13.62      1tnf C  
ATOM   2110  CG  LEU B  76      12.048  52.126  25.596  1.00 11.29      1tnf C  
ATOM   2111  CD1 LEU B  76      13.130  52.943  26.311  1.00  7.44      1tnf C  
ATOM   2112  CD2 LEU B  76      12.189  52.251  24.110  1.00 11.41      1tnf C  
ATOM   2113  HN  LEU B  76       9.645  50.981  26.726  1.00  0.00      1tnf H  
ATOM   2114  N   THR B  77      11.612  47.457  26.768  1.00 10.25      1tnf N  
ATOM   2115  CA  THR B  77      11.671  46.512  27.831  1.00  7.68      1tnf C  
ATOM   2116  C   THR B  77      13.053  45.893  27.913  1.00 10.31      1tnf C  
ATOM   2117  O   THR B  77      13.954  45.998  27.060  1.00 11.35      1tnf O  
ATOM   2118  CB  THR B  77      10.550  45.419  27.655  1.00 10.51      1tnf C  
ATOM   2119  CG2 THR B  77       9.152  46.040  27.365  1.00  8.23      1tnf C  
ATOM   2120  OG1 THR B  77      10.948  44.532  26.620  1.00 13.04      1tnf O  
ATOM   2121  HN  THR B  77      11.928  47.201  25.833  1.00  0.00      1tnf H  
ATOM   2122  HG1 THR B  77      11.801  44.153  26.797  1.00  0.00      1tnf H  
ATOM   2123  N   HIS B  78      13.262  45.326  29.087  1.00 12.09      1tnf N  
ATOM   2124  CA  HIS B  78      14.523  44.692  29.390  1.00 12.54      1tnf C  
ATOM   2125  C   HIS B  78      14.231  43.588  30.404  1.00 11.62      1tnf C  
ATOM   2126  O   HIS B  78      13.570  43.874  31.405  1.00  7.48      1tnf O  
ATOM   2127  CB  HIS B  78      15.433  45.786  29.910  1.00 11.99      1tnf C  
ATOM   2128  CG  HIS B  78      16.757  45.274  30.427  1.00 14.86      1tnf C  
ATOM   2129  CD2 HIS B  78      17.509  44.271  29.876  1.00 16.62      1tnf C  
ATOM   2130  ND1 HIS B  78      17.393  45.719  31.500  1.00 19.47      1tnf N  
ATOM   2131  CE1 HIS B  78      18.492  45.034  31.625  1.00 18.01      1tnf C  
ATOM   2132  NE2 HIS B  78      18.550  44.171  30.657  1.00 18.18      1tnf N  
ATOM   2133  HN  HIS B  78      12.522  45.336  29.789  1.00  0.00      1tnf H  
ATOM   2134  HD1 HIS B  78      17.077  46.466  32.119  1.00  0.00      1tnf H  
ATOM   2135  HE2 HIS B  78      19.309  43.503  30.524  1.00  0.00      1tnf H  
ATOM   2136  N   THR B  79      14.660  42.349  30.128  1.00  6.77      1tnf N  
ATOM   2137  CA  THR B  79      14.458  41.272  31.068  1.00 13.36      1tnf C  
ATOM   2138  C   THR B  79      15.650  40.304  31.049  1.00 12.21      1tnf C  
ATOM   2139  O   THR B  79      16.544  40.361  30.191  1.00  7.79      1tnf O  
ATOM   2140  CB  THR B  79      13.120  40.453  30.775  1.00 14.95      1tnf C  
ATOM   2141  CG2 THR B  79      11.812  41.247  30.751  1.00 19.78      1tnf C  
ATOM   2142  OG1 THR B  79      13.264  39.963  29.458  1.00 17.46      1tnf O  
ATOM   2143  HN  THR B  79      15.134  42.165  29.244  1.00  0.00      1tnf H  
ATOM   2144  HG1 THR B  79      14.076  39.470  29.473  1.00  0.00      1tnf H  
ATOM   2145  N   ILE B  80      15.694  39.495  32.091  1.00  7.89      1tnf N  
ATOM   2146  CA  ILE B  80      16.695  38.478  32.209  1.00  9.19      1tnf C  
ATOM   2147  C   ILE B  80      15.837  37.237  32.480  1.00 12.33      1tnf C  
ATOM   2148  O   ILE B  80      14.875  37.218  33.272  1.00  9.10      1tnf O  
ATOM   2149  CB  ILE B  80      17.706  38.755  33.386  1.00  6.62      1tnf C  
ATOM   2150  CG1 ILE B  80      18.377  40.093  33.211  1.00  3.78      1tnf C  
ATOM   2151  CG2 ILE B  80      18.720  37.624  33.468  1.00  6.11      1tnf C  
ATOM   2152  CD1 ILE B  80      19.536  40.345  34.145  1.00  7.07      1tnf C  
ATOM   2153  HN  ILE B  80      14.998  39.597  32.830  1.00  0.00      1tnf H  
ATOM   2154  N   SER B  81      16.205  36.187  31.762  1.00 14.46      1tnf N  
ATOM   2155  CA  SER B  81      15.489  34.920  31.818  1.00 15.54      1tnf C  
ATOM   2156  C   SER B  81      16.559  33.939  32.135  1.00 11.54      1tnf C  
ATOM   2157  O   SER B  81      17.729  34.151  31.742  1.00  7.69      1tnf O  
ATOM   2158  CB  SER B  81      14.885  34.483  30.472  1.00 17.31      1tnf C  
ATOM   2159  OG  SER B  81      14.632  35.609  29.631  1.00 26.60      1tnf O  
ATOM   2160  HN  SER B  81      17.017  36.268  31.150  1.00  0.00      1tnf H  
ATOM   2161  HG  SER B  81      14.259  35.339  28.800  1.00  0.00      1tnf H  
ATOM   2162  N   ARG B  82      16.078  32.944  32.875  1.00  8.29      1tnf N  
ATOM   2163  CA  ARG B  82      16.896  31.803  33.186  1.00 13.47      1tnf C  
ATOM   2164  C   ARG B  82      16.299  30.786  32.268  1.00 11.81      1tnf C  
ATOM   2165  O   ARG B  82      15.097  30.697  32.139  1.00 17.56      1tnf O  
ATOM   2166  CB  ARG B  82      16.737  31.498  34.674  1.00 16.16      1tnf C  
ATOM   2167  CG  ARG B  82      16.002  30.313  35.312  1.00 18.34      1tnf C  
ATOM   2168  CD  ARG B  82      16.982  29.272  35.864  1.00 19.21      1tnf C  
ATOM   2169  NE  ARG B  82      16.391  28.647  37.023  1.00 21.65      1tnf N  
ATOM   2170  CZ  ARG B  82      16.644  27.380  37.400  1.00 25.08      1tnf C  
ATOM   2171  NH1 ARG B  82      16.034  26.878  38.491  1.00 25.17      1tnf N1+
ATOM   2172  NH2 ARG B  82      17.504  26.590  36.745  1.00 24.94      1tnf N  
ATOM   2173  HN  ARG B  82      15.121  32.991  33.225  1.00  0.00      1tnf H  
ATOM   2174  HE  ARG B  82      15.745  29.197  37.589  1.00  0.00      1tnf H  
ATOM   2175 1HH1 ARG B  82      15.379  27.480  38.990  1.00  0.00      1tnf H  
ATOM   2176 2HH1 ARG B  82      16.226  25.918  38.777  1.00  0.00      1tnf H  
ATOM   2177 1HH2 ARG B  82      17.966  26.970  35.919  1.00  0.00      1tnf H  
ATOM   2178 2HH2 ARG B  82      17.696  25.630  37.031  1.00  0.00      1tnf H  
ATOM   2179  N   ILE B  83      17.092  30.209  31.411  1.00 17.58      1tnf N  
ATOM   2180  CA  ILE B  83      16.683  29.140  30.554  1.00 16.27      1tnf C  
ATOM   2181  C   ILE B  83      17.461  28.012  31.233  1.00 18.44      1tnf C  
ATOM   2182  O   ILE B  83      18.682  27.891  31.283  1.00 16.99      1tnf O  
ATOM   2183  CB  ILE B  83      17.043  29.471  28.996  1.00 19.44      1tnf C  
ATOM   2184  CG1 ILE B  83      17.617  28.245  28.419  1.00 21.11      1tnf C  
ATOM   2185  CG2 ILE B  83      18.031  30.568  28.706  1.00 19.94      1tnf C  
ATOM   2186  CD1 ILE B  83      16.494  27.253  28.202  1.00 21.43      1tnf C  
ATOM   2187  HN  ILE B  83      18.056  30.537  31.348  1.00  0.00      1tnf H  
ATOM   2188  N   ALA B  84      16.596  27.272  31.932  1.00 21.57      1tnf N  
ATOM   2189  CA  ALA B  84      16.915  26.112  32.763  1.00 18.17      1tnf C  
ATOM   2190  C   ALA B  84      17.781  24.953  32.250  1.00 19.37      1tnf C  
ATOM   2191  O   ALA B  84      18.728  25.122  31.508  1.00 19.57      1tnf O  
ATOM   2192  CB  ALA B  84      15.580  25.592  33.208  1.00 17.67      1tnf C  
ATOM   2193  HN  ALA B  84      15.614  27.544  31.881  1.00  0.00      1tnf H  
ATOM   2194  N   VAL B  85      17.562  23.756  32.764  1.00 23.07      1tnf N  
ATOM   2195  CA  VAL B  85      18.163  22.494  32.325  1.00 25.56      1tnf C  
ATOM   2196  C   VAL B  85      17.042  21.445  32.391  1.00 30.11      1tnf C  
ATOM   2197  O   VAL B  85      17.063  20.517  31.584  1.00 28.70      1tnf O  
ATOM   2198  CB  VAL B  85      19.318  21.980  33.221  1.00 25.12      1tnf C  
ATOM   2199  CG1 VAL B  85      20.615  22.456  32.658  1.00 23.52      1tnf C  
ATOM   2200  CG2 VAL B  85      19.204  22.502  34.642  1.00 26.82      1tnf C  
ATOM   2201  HN  VAL B  85      16.908  23.705  33.545  1.00  0.00      1tnf H  
ATOM   2202  N   SER B  86      16.075  21.572  33.346  1.00 33.73      1tnf N  
ATOM   2203  CA  SER B  86      14.891  20.729  33.464  1.00 36.59      1tnf C  
ATOM   2204  C   SER B  86      13.870  21.408  32.574  1.00 40.77      1tnf C  
ATOM   2205  O   SER B  86      14.087  21.296  31.364  1.00 41.29      1tnf O  
ATOM   2206  CB  SER B  86      14.358  20.679  34.884  1.00 36.00      1tnf C  
ATOM   2207  OG  SER B  86      15.201  21.352  35.807  1.00 39.04      1tnf O  
ATOM   2208  HN  SER B  86      16.190  22.317  34.033  1.00  0.00      1tnf H  
ATOM   2209  HG  SER B  86      14.867  21.321  36.696  1.00  0.00      1tnf H  
ATOM   2210  N   TYR B  87      12.851  22.183  33.028  1.00 44.21      1tnf N  
ATOM   2211  CA  TYR B  87      11.836  22.849  32.174  1.00 46.25      1tnf C  
ATOM   2212  C   TYR B  87      12.391  24.090  31.430  1.00 45.68      1tnf C  
ATOM   2213  O   TYR B  87      11.812  25.169  31.348  1.00 45.86      1tnf O  
ATOM   2214  CB  TYR B  87      10.655  23.153  33.140  1.00 50.10      1tnf C  
ATOM   2215  CG  TYR B  87       9.484  24.091  32.798  1.00 53.30      1tnf C  
ATOM   2216  CD1 TYR B  87       9.519  25.435  33.138  1.00 55.59      1tnf C  
ATOM   2217  CD2 TYR B  87       8.321  23.593  32.252  1.00 55.39      1tnf C  
ATOM   2218  CE1 TYR B  87       8.399  26.226  32.949  1.00 57.38      1tnf C  
ATOM   2219  CE2 TYR B  87       7.194  24.375  32.045  1.00 56.86      1tnf C  
ATOM   2220  CZ  TYR B  87       7.228  25.702  32.410  1.00 57.55      1tnf C  
ATOM   2221  OH  TYR B  87       6.072  26.470  32.323  1.00 55.97      1tnf O  
ATOM   2222  HN  TYR B  87      12.777  22.318  34.036  1.00  0.00      1tnf H  
ATOM   2223  HH  TYR B  87       6.095  27.386  32.575  1.00  0.00      1tnf H  
ATOM   2224  N   GLN B  88      13.516  23.808  30.780  1.00 45.34      1tnf N  
ATOM   2225  CA  GLN B  88      14.432  24.669  30.066  1.00 45.23      1tnf C  
ATOM   2226  C   GLN B  88      13.786  25.485  28.918  1.00 43.41      1tnf C  
ATOM   2227  O   GLN B  88      14.065  25.262  27.749  1.00 40.86      1tnf O  
ATOM   2228  CB  GLN B  88      15.533  23.636  29.671  1.00 49.00      1tnf C  
ATOM   2229  CG  GLN B  88      16.936  23.707  28.981  1.00 53.27      1tnf C  
ATOM   2230  CD  GLN B  88      17.544  22.350  28.455  1.00 54.31      1tnf C  
ATOM   2231  NE2 GLN B  88      17.482  21.171  29.081  1.00 51.81      1tnf N  
ATOM   2232  OE1 GLN B  88      18.100  22.295  27.351  1.00 53.33      1tnf O  
ATOM   2233  HN  GLN B  88      13.776  22.822  30.786  1.00  0.00      1tnf H  
ATOM   2234 1HE2 GLN B  88      17.875  20.293  28.741  1.00  0.00      1tnf H  
ATOM   2235 2HE2 GLN B  88      17.024  21.216  29.991  1.00  0.00      1tnf H  
ATOM   2236  N   THR B  89      12.845  26.394  29.188  1.00 39.23      1tnf N  
ATOM   2237  CA  THR B  89      12.383  27.442  28.287  1.00 31.60      1tnf C  
ATOM   2238  C   THR B  89      12.690  28.699  29.132  1.00 28.11      1tnf C  
ATOM   2239  O   THR B  89      13.229  28.576  30.249  1.00 29.42      1tnf O  
ATOM   2240  CB  THR B  89      10.851  27.390  27.988  1.00 31.05      1tnf C  
ATOM   2241  CG2 THR B  89      10.584  26.511  26.762  1.00 33.80      1tnf C  
ATOM   2242  OG1 THR B  89      10.157  27.034  29.182  1.00 31.60      1tnf O  
ATOM   2243  HN  THR B  89      12.410  26.350  30.110  1.00  0.00      1tnf H  
ATOM   2244  HG1 THR B  89       9.225  27.002  29.000  1.00  0.00      1tnf H  
ATOM   2245  N   LYS B  90      12.337  29.909  28.688  1.00 22.12      1tnf N  
ATOM   2246  CA  LYS B  90      12.678  31.129  29.410  1.00 21.98      1tnf C  
ATOM   2247  C   LYS B  90      11.826  31.372  30.668  1.00 21.78      1tnf C  
ATOM   2248  O   LYS B  90      10.604  31.474  30.487  1.00 22.23      1tnf O  
ATOM   2249  CB  LYS B  90      12.507  32.375  28.499  1.00 19.85      1tnf C  
ATOM   2250  CG  LYS B  90      13.263  32.493  27.180  1.00 16.79      1tnf C  
ATOM   2251  CD  LYS B  90      14.739  32.732  27.353  1.00 15.19      1tnf C  
ATOM   2252  CE  LYS B  90      15.536  32.506  26.068  1.00 13.49      1tnf C  
ATOM   2253  NZ  LYS B  90      15.108  33.323  24.959  1.00 11.74      1tnf N1+
ATOM   2254  HN  LYS B  90      11.812  29.981  27.816  1.00  0.00      1tnf H  
ATOM   2255  HZ1 LYS B  90      15.640  33.172  24.102  1.00  0.00      1tnf H  
ATOM   2256  HZ2 LYS B  90      15.118  34.310  25.217  1.00  0.00      1tnf H  
ATOM   2257  HZ3 LYS B  90      14.110  33.199  24.788  1.00  0.00      1tnf H  
ATOM   2258  N   VAL B  91      12.301  31.386  31.925  1.00 19.36      1tnf N  
ATOM   2259  CA  VAL B  91      11.410  31.949  32.940  1.00 22.25      1tnf C  
ATOM   2260  C   VAL B  91      12.044  33.258  33.341  1.00 22.92      1tnf C  
ATOM   2261  O   VAL B  91      13.255  33.405  33.562  1.00 27.61      1tnf O  
ATOM   2262  CB  VAL B  91      11.182  31.160  34.265  1.00 19.48      1tnf C  
ATOM   2263  CG1 VAL B  91      10.957  29.743  33.792  1.00 26.22      1tnf C  
ATOM   2264  CG2 VAL B  91      12.261  31.259  35.299  1.00 20.75      1tnf C  
ATOM   2265  HN  VAL B  91      13.227  31.026  32.157  1.00  0.00      1tnf H  
ATOM   2266  N   ASN B  92      11.141  34.214  33.314  1.00 20.23      1tnf N  
ATOM   2267  CA  ASN B  92      11.445  35.568  33.671  1.00 16.91      1tnf C  
ATOM   2268  C   ASN B  92      11.824  35.668  35.134  1.00 15.73      1tnf C  
ATOM   2269  O   ASN B  92      11.081  35.296  36.051  1.00 14.31      1tnf O  
ATOM   2270  CB  ASN B  92      10.246  36.461  33.407  1.00 15.62      1tnf C  
ATOM   2271  CG  ASN B  92      10.223  36.968  31.989  1.00 15.92      1tnf C  
ATOM   2272  ND2 ASN B  92       9.609  36.299  31.028  1.00 12.88      1tnf N  
ATOM   2273  OD1 ASN B  92      10.783  38.026  31.713  1.00 18.53      1tnf O  
ATOM   2274  HN  ASN B  92      10.189  33.983  33.028  1.00  0.00      1tnf H  
ATOM   2275 1HD2 ASN B  92       9.144  35.421  31.257  1.00  0.00      1tnf H  
ATOM   2276 2HD2 ASN B  92       9.593  36.642  30.068  1.00  0.00      1tnf H  
ATOM   2277  N   LEU B  93      13.067  36.069  35.324  1.00 13.65      1tnf N  
ATOM   2278  CA  LEU B  93      13.574  36.335  36.658  1.00 12.64      1tnf C  
ATOM   2279  C   LEU B  93      13.403  37.821  37.036  1.00 11.88      1tnf C  
ATOM   2280  O   LEU B  93      13.000  38.129  38.143  1.00 10.35      1tnf O  
ATOM   2281  CB  LEU B  93      15.089  35.941  36.745  1.00  9.50      1tnf C  
ATOM   2282  CG  LEU B  93      15.596  34.518  36.546  1.00  6.43      1tnf C  
ATOM   2283  CD1 LEU B  93      16.964  34.468  37.134  1.00  7.20      1tnf C  
ATOM   2284  CD2 LEU B  93      14.742  33.477  37.247  1.00  5.00      1tnf C  
ATOM   2285  HN  LEU B  93      13.682  36.194  34.520  1.00  0.00      1tnf H  
ATOM   2286  N   LEU B  94      13.604  38.756  36.110  1.00 10.90      1tnf N  
ATOM   2287  CA  LEU B  94      13.712  40.176  36.358  1.00  9.82      1tnf C  
ATOM   2288  C   LEU B  94      13.230  40.933  35.116  1.00 11.49      1tnf C  
ATOM   2289  O   LEU B  94      13.501  40.524  33.982  1.00 12.21      1tnf O  
ATOM   2290  CB  LEU B  94      15.173  40.591  36.634  1.00  8.84      1tnf C  
ATOM   2291  CG  LEU B  94      16.040  40.150  37.804  1.00 12.82      1tnf C  
ATOM   2292  CD1 LEU B  94      17.323  40.932  37.689  1.00 12.55      1tnf C  
ATOM   2293  CD2 LEU B  94      15.399  40.419  39.160  1.00 11.94      1tnf C  
ATOM   2294  HN  LEU B  94      13.689  38.444  35.143  1.00  0.00      1tnf H  
ATOM   2295  N   SER B  95      12.661  42.117  35.232  1.00  9.82      1tnf N  
ATOM   2296  CA  SER B  95      12.009  42.731  34.111  1.00  9.16      1tnf C  
ATOM   2297  C   SER B  95      11.741  44.179  34.463  1.00  7.79      1tnf C  
ATOM   2298  O   SER B  95      11.406  44.520  35.582  1.00  7.61      1tnf O  
ATOM   2299  CB  SER B  95      10.626  42.125  33.816  1.00 10.97      1tnf C  
ATOM   2300  OG  SER B  95      10.391  40.731  33.925  1.00 15.19      1tnf O  
ATOM   2301  HN  SER B  95      12.685  42.602  36.129  1.00  0.00      1tnf H  
ATOM   2302  HG  SER B  95       9.537  40.357  33.743  1.00  0.00      1tnf H  
ATOM   2303  N   ALA B  96      11.881  45.040  33.490  1.00  3.91      1tnf N  
ATOM   2304  CA  ALA B  96      11.426  46.350  33.642  1.00  2.00      1tnf C  
ATOM   2305  C   ALA B  96      11.002  46.807  32.266  1.00  5.97      1tnf C  
ATOM   2306  O   ALA B  96      11.340  46.191  31.245  1.00  7.84      1tnf O  
ATOM   2307  CB  ALA B  96      12.503  47.177  34.154  1.00  3.64      1tnf C  
ATOM   2308  HN  ALA B  96      12.324  44.753  32.617  1.00  0.00      1tnf H  
ATOM   2309  N   ILE B  97      10.181  47.877  32.311  1.00  7.48      1tnf N  
ATOM   2310  CA  ILE B  97       9.519  48.481  31.178  1.00  7.46      1tnf C  
ATOM   2311  C   ILE B  97       9.535  49.999  31.286  1.00  7.29      1tnf C  
ATOM   2312  O   ILE B  97       8.851  50.445  32.195  1.00  8.37      1tnf O  
ATOM   2313  CB  ILE B  97       8.045  48.039  31.119  1.00  6.26      1tnf C  
ATOM   2314  CG1 ILE B  97       7.824  46.591  31.404  1.00  4.37      1tnf C  
ATOM   2315  CG2 ILE B  97       7.590  48.351  29.690  1.00 12.33      1tnf C  
ATOM   2316  CD1 ILE B  97       6.363  46.222  31.565  1.00 10.24      1tnf C  
ATOM   2317  HN  ILE B  97      10.013  48.296  33.226  1.00  0.00      1tnf H  
ATOM   2318  N   LYS B  98      10.215  50.854  30.529  1.00  7.57      1tnf N  
ATOM   2319  CA  LYS B  98       9.993  52.297  30.636  1.00  8.22      1tnf C  
ATOM   2320  C   LYS B  98       9.295  52.796  29.359  1.00  9.92      1tnf C  
ATOM   2321  O   LYS B  98       9.568  52.303  28.262  1.00  7.84      1tnf O  
ATOM   2322  CB  LYS B  98      11.231  53.180  30.697  1.00  9.49      1tnf C  
ATOM   2323  CG  LYS B  98      12.118  52.989  31.868  1.00 13.18      1tnf C  
ATOM   2324  CD  LYS B  98      12.820  54.296  32.208  1.00 12.95      1tnf C  
ATOM   2325  CE  LYS B  98      13.787  54.095  33.317  1.00 12.85      1tnf C  
ATOM   2326  NZ  LYS B  98      14.568  55.287  33.568  1.00 15.42      1tnf N1+
ATOM   2327  HN  LYS B  98      10.902  50.499  29.864  1.00  0.00      1tnf H  
ATOM   2328  HZ1 LYS B  98      15.232  55.149  34.330  1.00  0.00      1tnf H  
ATOM   2329  HZ2 LYS B  98      13.969  56.095  33.738  1.00  0.00      1tnf H  
ATOM   2330  HZ3 LYS B  98      15.035  55.611  32.721  1.00  0.00      1tnf H  
ATOM   2331  N   SER B  99       8.392  53.758  29.398  1.00  9.12      1tnf N  
ATOM   2332  CA  SER B  99       7.950  54.364  28.188  1.00 11.57      1tnf C  
ATOM   2333  C   SER B  99       8.524  55.788  28.153  1.00 14.16      1tnf C  
ATOM   2334  O   SER B  99       8.199  56.601  29.008  1.00 15.43      1tnf O  
ATOM   2335  CB  SER B  99       6.427  54.297  28.188  1.00 14.12      1tnf C  
ATOM   2336  OG  SER B  99       5.827  54.696  29.402  1.00 16.55      1tnf O  
ATOM   2337  HN  SER B  99       8.012  54.066  30.293  1.00  0.00      1tnf H  
ATOM   2338  HG  SER B  99       4.878  54.654  29.402  1.00  0.00      1tnf H  
ATOM   2339  N   PRO B 100       9.419  56.150  27.224  1.00 15.31      1tnf N  
ATOM   2340  CA  PRO B 100      10.092  57.433  27.184  1.00 19.25      1tnf C  
ATOM   2341  C   PRO B 100       9.304  58.610  26.631  1.00 23.68      1tnf C  
ATOM   2342  O   PRO B 100       9.575  59.767  26.994  1.00 27.11      1tnf O  
ATOM   2343  CB  PRO B 100      11.344  57.170  26.372  1.00 18.56      1tnf C  
ATOM   2344  CG  PRO B 100      10.862  56.158  25.383  1.00 16.01      1tnf C  
ATOM   2345  CD  PRO B 100      10.115  55.238  26.327  1.00 15.62      1tnf C  
ATOM   2346  N   CYS B 101       8.402  58.302  25.680  1.00 26.61      1tnf N  
ATOM   2347  CA  CYS B 101       7.596  59.319  24.978  1.00 26.40      1tnf C  
ATOM   2348  C   CYS B 101       6.177  59.318  25.498  1.00 27.50      1tnf C  
ATOM   2349  O   CYS B 101       5.568  58.267  25.352  1.00 27.80      1tnf O  
ATOM   2350  CB  CYS B 101       7.488  59.045  23.449  1.00 24.48      1tnf C  
ATOM   2351  SG  CYS B 101       9.017  58.966  22.509  1.00 18.64      1tnf S  
ATOM   2352  HN  CYS B 101       8.270  57.321  25.434  1.00  0.00      1tnf H  
ATOM   2353  N   GLN B 102       5.543  60.288  26.122  1.00 34.30      1tnf N  
ATOM   2354  CA  GLN B 102       4.114  60.190  26.421  1.00 43.38      1tnf C  
ATOM   2355  C   GLN B 102       3.678  61.522  25.885  1.00 47.62      1tnf C  
ATOM   2356  O   GLN B 102       3.825  62.577  26.512  1.00 48.31      1tnf O  
ATOM   2357  CB  GLN B 102       3.824  60.121  27.903  1.00 46.73      1tnf C  
ATOM   2358  CG  GLN B 102       3.746  58.732  28.526  1.00 47.91      1tnf C  
ATOM   2359  CD  GLN B 102       3.910  58.963  30.013  1.00 50.31      1tnf C  
ATOM   2360  NE2 GLN B 102       5.121  58.767  30.550  1.00 51.38      1tnf N  
ATOM   2361  OE1 GLN B 102       2.960  59.336  30.707  1.00 49.56      1tnf O  
ATOM   2362  HN  GLN B 102       6.057  61.123  26.402  1.00  0.00      1tnf H  
ATOM   2363 1HE2 GLN B 102       5.232  58.923  31.552  1.00  0.00      1tnf H  
ATOM   2364 2HE2 GLN B 102       5.906  58.459  29.976  1.00  0.00      1tnf H  
ATOM   2365  N   ARG B 103       3.307  61.343  24.603  1.00 52.92      1tnf N  
ATOM   2366  CA  ARG B 103       3.090  62.428  23.636  1.00 56.65      1tnf C  
ATOM   2367  C   ARG B 103       4.415  63.219  23.426  1.00 58.23      1tnf C  
ATOM   2368  O   ARG B 103       5.412  62.965  24.113  1.00 61.27      1tnf O  
ATOM   2369  CB  ARG B 103       1.928  63.294  24.171  1.00 57.05      1tnf C  
ATOM   2370  CG  ARG B 103       1.801  64.746  23.682  1.00 58.89      1tnf C  
ATOM   2371  CD  ARG B 103       1.673  64.937  22.161  1.00 56.61      1tnf C  
ATOM   2372  NE  ARG B 103       1.163  66.271  21.927  1.00 55.14      1tnf N  
ATOM   2373  CZ  ARG B 103      -0.164  66.470  21.840  1.00 55.10      1tnf C  
ATOM   2374  NH1 ARG B 103      -0.646  67.711  21.707  1.00 54.90      1tnf N1+
ATOM   2375  NH2 ARG B 103      -1.033  65.450  21.855  1.00 55.14      1tnf N  
ATOM   2376  HN  ARG B 103       3.167  60.386  24.280  1.00  0.00      1tnf H  
ATOM   2377  HE  ARG B 103       1.807  67.056  21.829  1.00  0.00      1tnf H  
ATOM   2378 1HH1 ARG B 103       0.015  68.487  21.696  1.00  0.00      1tnf H  
ATOM   2379 2HH1 ARG B 103      -1.653  67.862  21.641  1.00  0.00      1tnf H  
ATOM   2380 1HH2 ARG B 103      -0.666  64.504  21.956  1.00  0.00      1tnf H  
ATOM   2381 2HH2 ARG B 103      -2.040  65.601  21.789  1.00  0.00      1tnf H  
ATOM   2382  N   GLU B 104       4.540  64.023  22.370  1.00 60.55      1tnf N  
ATOM   2383  CA  GLU B 104       5.627  64.976  22.072  1.00 62.45      1tnf C  
ATOM   2384  C   GLU B 104       5.549  65.036  20.542  1.00 63.35      1tnf C  
ATOM   2385  O   GLU B 104       5.566  66.140  19.976  1.00 65.04      1tnf O  
ATOM   2386  CB  GLU B 104       7.087  64.524  22.412  1.00 63.55      1tnf C  
ATOM   2387  CG  GLU B 104       7.877  65.380  23.423  1.00 63.90      1tnf C  
ATOM   2388  CD  GLU B 104       8.588  66.657  22.919  1.00 63.44      1tnf C  
ATOM   2389  OE1 GLU B 104       7.933  67.704  22.770  1.00 62.55      1tnf O  
ATOM   2390  OE2 GLU B 104       9.808  66.596  22.701  1.00 61.79      1tnf O1-
ATOM   2391  HN  GLU B 104       3.790  63.973  21.681  1.00  0.00      1tnf H  
ATOM   2392  N   THR B 105       5.541  63.872  19.851  1.00 60.16      1tnf N  
ATOM   2393  CA  THR B 105       5.245  63.798  18.418  1.00 59.63      1tnf C  
ATOM   2394  C   THR B 105       5.886  64.878  17.492  1.00 58.44      1tnf C  
ATOM   2395  O   THR B 105       5.269  65.392  16.530  1.00 55.72      1tnf O  
ATOM   2396  CB  THR B 105       3.676  63.811  18.277  1.00 60.40      1tnf C  
ATOM   2397  CG2 THR B 105       3.240  62.762  17.230  1.00 61.57      1tnf C  
ATOM   2398  OG1 THR B 105       3.054  63.577  19.560  1.00 60.68      1tnf O  
ATOM   2399  HN  THR B 105       5.750  63.008  20.350  1.00  0.00      1tnf H  
ATOM   2400  HG1 THR B 105       3.322  64.222  20.204  1.00  0.00      1tnf H  
ATOM   2401  N   PRO B 106       7.124  65.299  17.785  1.00 56.88      1tnf N  
ATOM   2402  CA  PRO B 106       7.519  66.702  17.604  1.00 56.95      1tnf C  
ATOM   2403  C   PRO B 106       7.610  67.257  16.157  1.00 55.91      1tnf C  
ATOM   2404  O   PRO B 106       8.672  67.339  15.515  1.00 55.11      1tnf O  
ATOM   2405  CB  PRO B 106       8.795  66.713  18.426  1.00 55.84      1tnf C  
ATOM   2406  CG  PRO B 106       8.696  65.523  19.379  1.00 53.87      1tnf C  
ATOM   2407  CD  PRO B 106       8.164  64.503  18.430  1.00 54.89      1tnf C  
ATOM   2408  N   GLU B 107       6.415  67.734  15.747  1.00 54.92      1tnf N  
ATOM   2409  CA  GLU B 107       6.048  68.185  14.390  1.00 52.56      1tnf C  
ATOM   2410  C   GLU B 107       6.822  69.276  13.665  1.00 48.18      1tnf C  
ATOM   2411  O   GLU B 107       7.464  69.036  12.646  1.00 45.24      1tnf O  
ATOM   2412  CB  GLU B 107       4.551  68.572  14.432  1.00 52.75      1tnf C  
ATOM   2413  CG  GLU B 107       3.936  68.611  13.036  1.00 53.95      1tnf C  
ATOM   2414  CD  GLU B 107       3.594  70.031  12.598  1.00 55.26      1tnf C  
ATOM   2415  OE1 GLU B 107       2.431  70.423  12.767  1.00 56.07      1tnf O  
ATOM   2416  OE2 GLU B 107       4.487  70.729  12.095  1.00 54.38      1tnf O1-
ATOM   2417  HN  GLU B 107       5.683  67.789  16.455  1.00  0.00      1tnf H  
ATOM   2418  N   GLY B 108       6.685  70.517  14.113  1.00 45.86      1tnf N  
ATOM   2419  CA  GLY B 108       7.472  71.626  13.594  1.00 43.18      1tnf C  
ATOM   2420  C   GLY B 108       8.731  71.730  14.451  1.00 41.05      1tnf C  
ATOM   2421  O   GLY B 108       9.051  72.793  15.003  1.00 35.54      1tnf O  
ATOM   2422  HN  GLY B 108       6.003  70.701  14.849  1.00  0.00      1tnf H  
ATOM   2423  N   ALA B 109       9.435  70.595  14.519  1.00 39.33      1tnf N  
ATOM   2424  CA  ALA B 109      10.532  70.528  15.438  1.00 46.50      1tnf C  
ATOM   2425  C   ALA B 109      11.746  69.657  15.109  1.00 49.36      1tnf C  
ATOM   2426  O   ALA B 109      12.902  70.096  15.297  1.00 49.42      1tnf O  
ATOM   2427  CB  ALA B 109      10.002  70.068  16.798  1.00 47.26      1tnf C  
ATOM   2428  HN  ALA B 109       9.197  69.796  13.931  1.00  0.00      1tnf H  
ATOM   2429  N   GLU B 110      11.495  68.397  14.703  1.00 49.46      1tnf N  
ATOM   2430  CA  GLU B 110      12.529  67.371  14.491  1.00 49.10      1tnf C  
ATOM   2431  C   GLU B 110      13.050  66.892  15.870  1.00 46.16      1tnf C  
ATOM   2432  O   GLU B 110      13.539  65.766  15.974  1.00 46.84      1tnf O  
ATOM   2433  CB  GLU B 110      13.719  67.901  13.606  1.00 49.89      1tnf C  
ATOM   2434  CG  GLU B 110      13.771  67.431  12.146  1.00 47.87      1tnf C  
ATOM   2435  CD  GLU B 110      14.994  66.539  11.868  1.00 48.31      1tnf C  
ATOM   2436  OE1 GLU B 110      15.041  65.402  12.376  1.00 48.20      1tnf O  
ATOM   2437  OE2 GLU B 110      15.903  66.985  11.150  1.00 44.88      1tnf O1-
ATOM   2438  HN  GLU B 110      10.524  68.137  14.531  1.00  0.00      1tnf H  
ATOM   2439  N   ALA B 111      12.996  67.708  16.934  1.00 41.81      1tnf N  
ATOM   2440  CA  ALA B 111      13.093  67.220  18.300  1.00 41.45      1tnf C  
ATOM   2441  C   ALA B 111      14.333  66.715  19.032  1.00 41.01      1tnf C  
ATOM   2442  O   ALA B 111      15.386  66.255  18.539  1.00 42.83      1tnf O  
ATOM   2443  CB  ALA B 111      12.076  66.120  18.517  1.00 42.78      1tnf C  
ATOM   2444  HN  ALA B 111      12.882  68.710  16.778  1.00  0.00      1tnf H  
ATOM   2445  N   LYS B 112      14.067  66.783  20.340  1.00 36.49      1tnf N  
ATOM   2446  CA  LYS B 112      15.112  66.517  21.299  1.00 30.61      1tnf C  
ATOM   2447  C   LYS B 112      15.287  65.029  21.534  1.00 26.09      1tnf C  
ATOM   2448  O   LYS B 112      14.335  64.240  21.434  1.00 25.22      1tnf O  
ATOM   2449  CB  LYS B 112      14.791  67.233  22.599  1.00 28.91      1tnf C  
ATOM   2450  CG  LYS B 112      14.930  68.741  22.547  1.00 28.86      1tnf C  
ATOM   2451  CD  LYS B 112      13.612  69.342  22.043  1.00 30.29      1tnf C  
ATOM   2452  CE  LYS B 112      13.711  70.823  21.747  1.00 26.33      1tnf C  
ATOM   2453  NZ  LYS B 112      14.695  71.039  20.710  1.00 26.59      1tnf N1+
ATOM   2454  HN  LYS B 112      13.128  67.022  20.659  1.00  0.00      1tnf H  
ATOM   2455  HZ1 LYS B 112      14.762  72.037  20.511  1.00  0.00      1tnf H  
ATOM   2456  HZ2 LYS B 112      14.501  70.490  19.873  1.00  0.00      1tnf H  
ATOM   2457  HZ3 LYS B 112      15.600  70.631  20.945  1.00  0.00      1tnf H  
ATOM   2458  N   PRO B 113      16.539  64.645  21.805  1.00 22.87      1tnf N  
ATOM   2459  CA  PRO B 113      16.866  63.310  22.276  1.00 21.61      1tnf C  
ATOM   2460  C   PRO B 113      16.666  62.986  23.791  1.00 20.84      1tnf C  
ATOM   2461  O   PRO B 113      17.031  63.742  24.711  1.00 19.02      1tnf O  
ATOM   2462  CB  PRO B 113      18.270  63.214  21.725  1.00 20.27      1tnf C  
ATOM   2463  CG  PRO B 113      18.884  64.573  21.944  1.00 17.65      1tnf C  
ATOM   2464  CD  PRO B 113      17.740  65.446  21.524  1.00 21.12      1tnf C  
ATOM   2465  N   TRP B 114      16.000  61.875  24.095  1.00 17.43      1tnf N  
ATOM   2466  CA  TRP B 114      15.829  61.412  25.460  1.00 14.88      1tnf C  
ATOM   2467  C   TRP B 114      16.830  60.300  25.728  1.00 16.49      1tnf C  
ATOM   2468  O   TRP B 114      17.476  59.784  24.816  1.00 18.10      1tnf O  
ATOM   2469  CB  TRP B 114      14.438  60.884  25.683  1.00 12.20      1tnf C  
ATOM   2470  CG  TRP B 114      13.891  60.016  24.554  1.00 11.89      1tnf C  
ATOM   2471  CD1 TRP B 114      13.150  60.523  23.504  1.00  8.99      1tnf C  
ATOM   2472  CD2 TRP B 114      14.089  58.671  24.461  1.00 10.90      1tnf C  
ATOM   2473  CE2 TRP B 114      13.427  58.376  23.283  1.00 10.15      1tnf C  
ATOM   2474  CE3 TRP B 114      14.738  57.702  25.196  1.00 11.00      1tnf C  
ATOM   2475  NE1 TRP B 114      12.890  59.498  22.761  1.00  7.31      1tnf N  
ATOM   2476  CZ2 TRP B 114      13.393  57.073  22.828  1.00  6.60      1tnf C  
ATOM   2477  CZ3 TRP B 114      14.695  56.423  24.721  1.00 10.76      1tnf C  
ATOM   2478  CH2 TRP B 114      14.034  56.122  23.551  1.00  6.40      1tnf C  
ATOM   2479  HN  TRP B 114      15.593  61.326  23.338  1.00  0.00      1tnf H  
ATOM   2480  HE1 TRP B 114      12.351  59.533  21.896  1.00  0.00      1tnf H  
ATOM   2481  N   TYR B 115      17.050  59.943  26.973  1.00 16.22      1tnf N  
ATOM   2482  CA  TYR B 115      17.880  58.811  27.314  1.00 14.86      1tnf C  
ATOM   2483  C   TYR B 115      17.073  58.134  28.392  1.00 13.37      1tnf C  
ATOM   2484  O   TYR B 115      16.387  58.824  29.162  1.00 14.56      1tnf O  
ATOM   2485  CB  TYR B 115      19.164  59.207  27.895  1.00 14.11      1tnf C  
ATOM   2486  CG  TYR B 115      20.077  59.767  26.860  1.00 17.66      1tnf C  
ATOM   2487  CD1 TYR B 115      19.995  61.126  26.571  1.00 21.75      1tnf C  
ATOM   2488  CD2 TYR B 115      21.052  58.975  26.299  1.00 17.89      1tnf C  
ATOM   2489  CE1 TYR B 115      20.899  61.737  25.724  1.00 22.07      1tnf C  
ATOM   2490  CE2 TYR B 115      21.971  59.595  25.451  1.00 23.26      1tnf C  
ATOM   2491  CZ  TYR B 115      21.900  60.973  25.164  1.00 23.55      1tnf C  
ATOM   2492  OH  TYR B 115      22.859  61.593  24.354  1.00 24.75      1tnf O  
ATOM   2493  HN  TYR B 115      16.620  60.483  27.724  1.00  0.00      1tnf H  
ATOM   2494  HH  TYR B 115      23.549  61.066  23.968  1.00  0.00      1tnf H  
ATOM   2495  N   GLU B 116      17.172  56.819  28.494  1.00 11.19      1tnf N  
ATOM   2496  CA  GLU B 116      16.318  56.059  29.364  1.00  9.21      1tnf C  
ATOM   2497  C   GLU B 116      17.149  54.917  29.837  1.00  9.79      1tnf C  
ATOM   2498  O   GLU B 116      17.407  54.092  28.949  1.00 15.15      1tnf O  
ATOM   2499  CB  GLU B 116      15.156  55.616  28.524  1.00 10.20      1tnf C  
ATOM   2500  CG  GLU B 116      13.860  55.682  29.218  1.00 17.12      1tnf C  
ATOM   2501  CD  GLU B 116      13.552  57.042  29.810  1.00 22.09      1tnf C  
ATOM   2502  OE1 GLU B 116      12.876  57.861  29.171  1.00 22.30      1tnf O  
ATOM   2503  OE2 GLU B 116      13.948  57.255  30.955  1.00 29.25      1tnf O1-
ATOM   2504  HN  GLU B 116      17.875  56.331  27.939  1.00  0.00      1tnf H  
ATOM   2505  N   PRO B 117      17.707  54.795  31.057  1.00 11.50      1tnf N  
ATOM   2506  CA  PRO B 117      18.430  53.574  31.426  1.00 10.73      1tnf C  
ATOM   2507  C   PRO B 117      17.583  52.573  32.159  1.00  7.76      1tnf C  
ATOM   2508  O   PRO B 117      16.577  53.009  32.696  1.00  7.89      1tnf O  
ATOM   2509  CB  PRO B 117      19.611  54.041  32.247  1.00  7.14      1tnf C  
ATOM   2510  CG  PRO B 117      19.068  55.218  32.939  1.00  8.27      1tnf C  
ATOM   2511  CD  PRO B 117      18.306  55.885  31.815  1.00 11.07      1tnf C  
ATOM   2512  N   ILE B 118      17.905  51.278  32.180  1.00  7.65      1tnf N  
ATOM   2513  CA  ILE B 118      17.201  50.331  33.048  1.00  9.62      1tnf C  
ATOM   2514  C   ILE B 118      18.147  49.294  33.650  1.00 13.84      1tnf C  
ATOM   2515  O   ILE B 118      18.845  48.507  32.958  1.00 17.24      1tnf O  
ATOM   2516  CB  ILE B 118      16.062  49.562  32.289  1.00 10.03      1tnf C  
ATOM   2517  CG1 ILE B 118      14.987  50.500  31.756  1.00  7.09      1tnf C  
ATOM   2518  CG2 ILE B 118      15.376  48.622  33.258  1.00  6.05      1tnf C  
ATOM   2519  CD1 ILE B 118      14.177  49.851  30.652  1.00  7.57      1tnf C  
ATOM   2520  HN  ILE B 118      18.657  50.941  31.579  1.00  0.00      1tnf H  
ATOM   2521  N   TYR B 119      18.068  49.291  34.988  1.00 14.43      1tnf N  
ATOM   2522  CA  TYR B 119      18.871  48.408  35.814  1.00 12.71      1tnf C  
ATOM   2523  C   TYR B 119      17.992  47.311  36.412  1.00 12.55      1tnf C  
ATOM   2524  O   TYR B 119      16.858  47.479  36.862  1.00 15.46      1tnf O  
ATOM   2525  CB  TYR B 119      19.534  49.197  36.914  1.00  8.30      1tnf C  
ATOM   2526  CG  TYR B 119      20.662  48.418  37.552  1.00  6.16      1tnf C  
ATOM   2527  CD1 TYR B 119      21.972  48.735  37.247  1.00 10.45      1tnf C  
ATOM   2528  CD2 TYR B 119      20.389  47.409  38.425  1.00  6.33      1tnf C  
ATOM   2529  CE1 TYR B 119      23.029  48.047  37.806  1.00 10.02      1tnf C  
ATOM   2530  CE2 TYR B 119      21.425  46.711  38.978  1.00 10.66      1tnf C  
ATOM   2531  CZ  TYR B 119      22.736  47.021  38.675  1.00 10.74      1tnf C  
ATOM   2532  OH  TYR B 119      23.741  46.274  39.241  1.00 10.24      1tnf O  
ATOM   2533  HN  TYR B 119      17.419  49.933  35.443  1.00  0.00      1tnf H  
ATOM   2534  HH  TYR B 119      24.643  46.487  39.033  1.00  0.00      1tnf H  
ATOM   2535  N   LEU B 120      18.617  46.155  36.431  1.00 15.55      1tnf N  
ATOM   2536  CA  LEU B 120      18.058  44.915  36.914  1.00 14.59      1tnf C  
ATOM   2537  C   LEU B 120      19.099  44.221  37.825  1.00 17.03      1tnf C  
ATOM   2538  O   LEU B 120      20.248  44.013  37.407  1.00 19.56      1tnf O  
ATOM   2539  CB  LEU B 120      17.727  44.164  35.647  1.00 12.08      1tnf C  
ATOM   2540  CG  LEU B 120      16.301  43.782  35.304  1.00 15.33      1tnf C  
ATOM   2541  CD1 LEU B 120      15.261  44.861  35.437  1.00 13.71      1tnf C  
ATOM   2542  CD2 LEU B 120      16.413  43.358  33.845  1.00 18.63      1tnf C  
ATOM   2543  HN  LEU B 120      19.573  46.132  36.076  1.00  0.00      1tnf H  
ATOM   2544  N   GLY B 121      18.823  43.903  39.095  1.00 14.18      1tnf N  
ATOM   2545  CA  GLY B 121      19.779  43.177  39.883  1.00  8.52      1tnf C  
ATOM   2546  C   GLY B 121      18.992  42.388  40.903  1.00 12.37      1tnf C  
ATOM   2547  O   GLY B 121      18.123  42.976  41.580  1.00 11.25      1tnf O  
ATOM   2548  HN  GLY B 121      17.930  44.177  39.505  1.00  0.00      1tnf H  
ATOM   2549  N   GLY B 122      19.282  41.084  41.023  1.00 12.56      1tnf N  
ATOM   2550  CA  GLY B 122      18.666  40.218  42.034  1.00 15.56      1tnf C  
ATOM   2551  C   GLY B 122      19.530  39.013  42.449  1.00 16.87      1tnf C  
ATOM   2552  O   GLY B 122      20.578  38.722  41.848  1.00 18.25      1tnf O  
ATOM   2553  HN  GLY B 122      19.962  40.676  40.382  1.00  0.00      1tnf H  
ATOM   2554  N   VAL B 123      19.147  38.314  43.514  1.00 13.82      1tnf N  
ATOM   2555  CA  VAL B 123      19.870  37.116  43.921  1.00 16.60      1tnf C  
ATOM   2556  C   VAL B 123      18.929  35.984  43.576  1.00 14.51      1tnf C  
ATOM   2557  O   VAL B 123      17.706  36.080  43.759  1.00 18.46      1tnf O  
ATOM   2558  CB  VAL B 123      20.213  37.049  45.455  1.00 18.43      1tnf C  
ATOM   2559  CG1 VAL B 123      20.884  35.699  45.787  1.00 19.83      1tnf C  
ATOM   2560  CG2 VAL B 123      21.238  38.132  45.824  1.00 18.49      1tnf C  
ATOM   2561  HN  VAL B 123      18.337  38.620  44.053  1.00  0.00      1tnf H  
ATOM   2562  N   PHE B 124      19.497  34.997  42.902  1.00 13.42      1tnf N  
ATOM   2563  CA  PHE B 124      18.755  33.829  42.499  1.00 14.73      1tnf C  
ATOM   2564  C   PHE B 124      19.633  32.589  42.543  1.00 15.64      1tnf C  
ATOM   2565  O   PHE B 124      20.861  32.586  42.368  1.00 11.74      1tnf O  
ATOM   2566  CB  PHE B 124      18.212  33.988  41.078  1.00 16.41      1tnf C  
ATOM   2567  CG  PHE B 124      17.298  35.192  40.827  1.00 14.01      1tnf C  
ATOM   2568  CD1 PHE B 124      17.841  36.438  40.648  1.00 10.64      1tnf C  
ATOM   2569  CD2 PHE B 124      15.950  35.015  40.846  1.00 12.69      1tnf C  
ATOM   2570  CE1 PHE B 124      17.004  37.503  40.516  1.00 13.27      1tnf C  
ATOM   2571  CE2 PHE B 124      15.122  36.094  40.713  1.00 13.50      1tnf C  
ATOM   2572  CZ  PHE B 124      15.651  37.337  40.548  1.00 12.59      1tnf C  
ATOM   2573  HN  PHE B 124      20.486  35.065  42.661  1.00  0.00      1tnf H  
ATOM   2574  N   GLN B 125      18.936  31.512  42.886  1.00 16.38      1tnf N  
ATOM   2575  CA  GLN B 125      19.529  30.183  42.913  1.00 19.75      1tnf C  
ATOM   2576  C   GLN B 125      19.462  29.557  41.523  1.00 18.89      1tnf C  
ATOM   2577  O   GLN B 125      18.368  29.254  41.052  1.00 21.59      1tnf O  
ATOM   2578  CB  GLN B 125      18.795  29.244  43.887  1.00 20.64      1tnf C  
ATOM   2579  CG  GLN B 125      19.558  27.916  43.965  1.00 20.79      1tnf C  
ATOM   2580  CD  GLN B 125      19.005  26.838  44.864  1.00 20.39      1tnf C  
ATOM   2581  NE2 GLN B 125      19.461  25.610  44.662  1.00 23.22      1tnf N  
ATOM   2582  OE1 GLN B 125      18.187  27.063  45.760  1.00 19.95      1tnf O  
ATOM   2583  HN  GLN B 125      17.954  31.619  43.139  1.00  0.00      1tnf H  
ATOM   2584 1HE2 GLN B 125      20.137  25.424  43.921  1.00  0.00      1tnf H  
ATOM   2585 2HE2 GLN B 125      19.087  24.881  45.270  1.00  0.00      1tnf H  
ATOM   2586  N   LEU B 126      20.589  29.416  40.839  1.00 17.66      1tnf N  
ATOM   2587  CA  LEU B 126      20.605  28.683  39.597  1.00 19.32      1tnf C  
ATOM   2588  C   LEU B 126      20.912  27.206  39.872  1.00 21.36      1tnf C  
ATOM   2589  O   LEU B 126      21.011  26.749  41.009  1.00 26.63      1tnf O  
ATOM   2590  CB  LEU B 126      21.675  29.258  38.646  1.00 16.78      1tnf C  
ATOM   2591  CG  LEU B 126      21.451  30.503  37.815  1.00 15.05      1tnf C  
ATOM   2592  CD1 LEU B 126      19.944  30.622  37.537  1.00 16.44      1tnf C  
ATOM   2593  CD2 LEU B 126      21.959  31.734  38.528  1.00 10.54      1tnf C  
ATOM   2594  HN  LEU B 126      21.451  29.829  41.194  1.00  0.00      1tnf H  
ATOM   2595  N   GLU B 127      21.072  26.398  38.843  1.00 25.44      1tnf N  
ATOM   2596  CA  GLU B 127      21.536  25.017  38.926  1.00 26.98      1tnf C  
ATOM   2597  C   GLU B 127      22.555  24.850  37.775  1.00 25.78      1tnf C  
ATOM   2598  O   GLU B 127      22.582  25.653  36.825  1.00 26.97      1tnf O  
ATOM   2599  CB  GLU B 127      20.353  24.066  38.789  1.00 26.77      1tnf C  
ATOM   2600  CG  GLU B 127      19.973  23.632  40.204  1.00 29.81      1tnf C  
ATOM   2601  CD  GLU B 127      18.500  23.888  40.548  1.00 35.09      1tnf C  
ATOM   2602  OE1 GLU B 127      18.229  24.698  41.455  1.00 36.59      1tnf O  
ATOM   2603  OE2 GLU B 127      17.624  23.272  39.908  1.00 35.18      1tnf O1-
ATOM   2604  HN  GLU B 127      20.855  26.767  37.917  1.00  0.00      1tnf H  
ATOM   2605  N   LYS B 128      23.445  23.862  37.837  1.00 24.72      1tnf N  
ATOM   2606  CA  LYS B 128      24.530  23.675  36.854  1.00 25.57      1tnf C  
ATOM   2607  C   LYS B 128      24.040  23.453  35.439  1.00 26.39      1tnf C  
ATOM   2608  O   LYS B 128      23.105  22.677  35.193  1.00 31.15      1tnf O  
ATOM   2609  CB  LYS B 128      25.391  22.483  37.277  1.00 24.31      1tnf C  
ATOM   2610  CG  LYS B 128      26.445  21.990  36.334  1.00 20.47      1tnf C  
ATOM   2611  CD  LYS B 128      27.401  21.095  37.077  1.00 18.14      1tnf C  
ATOM   2612  CE  LYS B 128      28.554  20.813  36.151  1.00 19.87      1tnf C  
ATOM   2613  NZ  LYS B 128      29.710  20.297  36.848  1.00 23.88      1tnf N1+
ATOM   2614  HN  LYS B 128      23.373  23.197  38.607  1.00  0.00      1tnf H  
ATOM   2615  HZ1 LYS B 128      30.491  20.106  36.221  1.00  0.00      1tnf H  
ATOM   2616  HZ2 LYS B 128      29.470  19.471  37.397  1.00  0.00      1tnf H  
ATOM   2617  HZ3 LYS B 128      29.991  20.921  37.605  1.00  0.00      1tnf H  
ATOM   2618  N   GLY B 129      24.652  24.165  34.521  1.00 25.54      1tnf N  
ATOM   2619  CA  GLY B 129      24.301  24.017  33.124  1.00 26.65      1tnf C  
ATOM   2620  C   GLY B 129      23.251  25.031  32.678  1.00 28.06      1tnf C  
ATOM   2621  O   GLY B 129      23.005  25.121  31.474  1.00 28.86      1tnf O  
ATOM   2622  HN  GLY B 129      25.379  24.826  34.794  1.00  0.00      1tnf H  
ATOM   2623  N   ASP B 130      22.645  25.792  33.612  1.00 27.10      1tnf N  
ATOM   2624  CA  ASP B 130      21.741  26.871  33.251  1.00 25.89      1tnf C  
ATOM   2625  C   ASP B 130      22.330  27.910  32.297  1.00 24.94      1tnf C  
ATOM   2626  O   ASP B 130      23.534  28.011  32.084  1.00 21.85      1tnf O  
ATOM   2627  CB  ASP B 130      21.296  27.620  34.475  1.00 27.75      1tnf C  
ATOM   2628  CG  ASP B 130      20.258  26.912  35.342  1.00 33.21      1tnf C  
ATOM   2629  OD1 ASP B 130      19.698  25.890  34.924  1.00 34.86      1tnf O  
ATOM   2630  OD2 ASP B 130      20.005  27.410  36.449  1.00 31.87      1tnf O1-
ATOM   2631  HN  ASP B 130      22.826  25.605  34.598  1.00  0.00      1tnf H  
ATOM   2632  N   ARG B 131      21.435  28.697  31.724  1.00 26.99      1tnf N  
ATOM   2633  CA  ARG B 131      21.697  29.797  30.817  1.00 22.47      1tnf C  
ATOM   2634  C   ARG B 131      20.814  30.983  31.322  1.00 23.31      1tnf C  
ATOM   2635  O   ARG B 131      19.757  30.903  31.967  1.00 20.53      1tnf O  
ATOM   2636  CB  ARG B 131      21.347  29.377  29.373  1.00 21.16      1tnf C  
ATOM   2637  CG  ARG B 131      22.208  28.300  28.701  1.00 19.65      1tnf C  
ATOM   2638  CD  ARG B 131      21.640  28.160  27.281  1.00 24.57      1tnf C  
ATOM   2639  NE  ARG B 131      22.224  27.191  26.347  1.00 28.12      1tnf N  
ATOM   2640  CZ  ARG B 131      22.803  27.546  25.161  1.00 31.35      1tnf C  
ATOM   2641  NH1 ARG B 131      23.312  26.606  24.375  1.00 31.02      1tnf N1+
ATOM   2642  NH2 ARG B 131      22.950  28.802  24.709  1.00 29.54      1tnf N  
ATOM   2643  HN  ARG B 131      20.457  28.510  31.944  1.00  0.00      1tnf H  
ATOM   2644  HE  ARG B 131      22.197  26.202  26.595  1.00  0.00      1tnf H  
ATOM   2645 1HH1 ARG B 131      23.744  26.871  23.490  1.00  0.00      1tnf H  
ATOM   2646 2HH1 ARG B 131      23.200  25.652  24.718  1.00  0.00      1tnf H  
ATOM   2647 1HH2 ARG B 131      23.382  29.067  23.824  1.00  0.00      1tnf H  
ATOM   2648 2HH2 ARG B 131      22.559  29.525  25.313  1.00  0.00      1tnf H  
ATOM   2649  N   LEU B 132      21.343  32.177  31.103  1.00 21.54      1tnf N  
ATOM   2650  CA  LEU B 132      20.799  33.416  31.597  1.00 17.92      1tnf C  
ATOM   2651  C   LEU B 132      20.856  34.334  30.397  1.00 17.67      1tnf C  
ATOM   2652  O   LEU B 132      21.912  34.381  29.759  1.00 13.87      1tnf O  
ATOM   2653  CB  LEU B 132      21.706  33.900  32.718  1.00 19.62      1tnf C  
ATOM   2654  CG  LEU B 132      22.002  32.934  33.864  1.00 18.60      1tnf C  
ATOM   2655  CD1 LEU B 132      23.323  33.259  34.545  1.00 19.18      1tnf C  
ATOM   2656  CD2 LEU B 132      20.801  32.967  34.753  1.00 19.26      1tnf C  
ATOM   2657  HN  LEU B 132      22.196  32.223  30.545  1.00  0.00      1tnf H  
ATOM   2658  N   SER B 133      19.806  35.074  30.046  1.00 17.35      1tnf N  
ATOM   2659  CA  SER B 133      19.864  35.956  28.899  1.00 17.02      1tnf C  
ATOM   2660  C   SER B 133      19.259  37.308  29.230  1.00 16.20      1tnf C  
ATOM   2661  O   SER B 133      18.255  37.329  29.911  1.00 17.48      1tnf O  
ATOM   2662  CB  SER B 133      19.123  35.320  27.721  1.00 16.57      1tnf C  
ATOM   2663  OG  SER B 133      17.777  34.936  27.997  1.00 22.42      1tnf O  
ATOM   2664  HN  SER B 133      18.947  35.019  30.594  1.00  0.00      1tnf H  
ATOM   2665  HG  SER B 133      17.317  34.541  27.266  1.00  0.00      1tnf H  
ATOM   2666  N   ALA B 134      19.929  38.406  28.856  1.00 20.76      1tnf N  
ATOM   2667  CA  ALA B 134      19.495  39.810  28.968  1.00 21.73      1tnf C  
ATOM   2668  C   ALA B 134      18.838  40.244  27.623  1.00 20.50      1tnf C  
ATOM   2669  O   ALA B 134      19.556  40.397  26.638  1.00 21.38      1tnf O  
ATOM   2670  CB  ALA B 134      20.727  40.666  29.259  1.00 19.67      1tnf C  
ATOM   2671  HN  ALA B 134      20.850  38.252  28.445  1.00  0.00      1tnf H  
ATOM   2672  N   GLU B 135      17.529  40.420  27.450  1.00 17.04      1tnf N  
ATOM   2673  CA  GLU B 135      16.922  40.687  26.141  1.00 18.01      1tnf C  
ATOM   2674  C   GLU B 135      16.128  41.982  26.241  1.00 14.40      1tnf C  
ATOM   2675  O   GLU B 135      15.308  42.209  27.124  1.00 14.32      1tnf O  
ATOM   2676  CB  GLU B 135      15.933  39.521  25.661  1.00 15.79      1tnf C  
ATOM   2677  CG  GLU B 135      16.475  38.081  25.766  1.00 15.33      1tnf C  
ATOM   2678  CD  GLU B 135      15.513  36.859  25.708  1.00 20.82      1tnf C  
ATOM   2679  OE1 GLU B 135      16.055  35.769  25.600  1.00 22.19      1tnf O  
ATOM   2680  OE2 GLU B 135      14.271  36.922  25.792  1.00 20.63      1tnf O1-
ATOM   2681  HN  GLU B 135      16.920  40.367  28.266  1.00  0.00      1tnf H  
ATOM   2682  N   ILE B 136      16.458  42.923  25.396  1.00 15.46      1tnf N  
ATOM   2683  CA  ILE B 136      15.648  44.137  25.299  1.00 18.00      1tnf C  
ATOM   2684  C   ILE B 136      14.635  43.950  24.158  1.00 19.89      1tnf C  
ATOM   2685  O   ILE B 136      14.807  43.026  23.346  1.00 20.61      1tnf O  
ATOM   2686  CB  ILE B 136      16.491  45.372  24.992  1.00 14.94      1tnf C  
ATOM   2687  CG1 ILE B 136      17.288  45.128  23.712  1.00 11.13      1tnf C  
ATOM   2688  CG2 ILE B 136      17.240  45.737  26.249  1.00 15.17      1tnf C  
ATOM   2689  CD1 ILE B 136      18.338  46.140  23.325  1.00  9.74      1tnf C  
ATOM   2690  HN  ILE B 136      17.281  42.811  24.804  1.00  0.00      1tnf H  
ATOM   2691  N   ASN B 137      13.598  44.788  24.010  1.00 16.57      1tnf N  
ATOM   2692  CA  ASN B 137      12.669  44.514  22.933  1.00 13.57      1tnf C  
ATOM   2693  C   ASN B 137      13.013  45.371  21.757  1.00 11.22      1tnf C  
ATOM   2694  O   ASN B 137      12.482  45.087  20.693  1.00 14.39      1tnf O  
ATOM   2695  CB  ASN B 137      11.195  44.755  23.368  1.00 14.66      1tnf C  
ATOM   2696  CG  ASN B 137      10.765  46.194  23.602  1.00 13.36      1tnf C  
ATOM   2697  ND2 ASN B 137       9.588  46.539  23.125  1.00 11.19      1tnf N  
ATOM   2698  OD1 ASN B 137      11.493  46.998  24.185  1.00 15.05      1tnf O  
ATOM   2699  HN  ASN B 137      13.469  45.587  24.631  1.00  0.00      1tnf H  
ATOM   2700 1HD2 ASN B 137       8.985  45.873  22.642  1.00  0.00      1tnf H  
ATOM   2701 2HD2 ASN B 137       9.299  47.505  23.282  1.00  0.00      1tnf H  
ATOM   2702  N   ARG B 138      13.892  46.364  21.910  1.00  7.82      1tnf N  
ATOM   2703  CA  ARG B 138      14.286  47.252  20.861  1.00  3.41      1tnf C  
ATOM   2704  C   ARG B 138      15.774  47.532  20.820  1.00  8.00      1tnf C  
ATOM   2705  O   ARG B 138      16.278  48.504  21.378  1.00 10.36      1tnf O  
ATOM   2706  CB  ARG B 138      13.569  48.542  21.007  1.00  8.44      1tnf C  
ATOM   2707  CG  ARG B 138      12.048  48.508  20.967  1.00 11.02      1tnf C  
ATOM   2708  CD  ARG B 138      11.480  48.310  19.557  1.00 16.26      1tnf C  
ATOM   2709  NE  ARG B 138      11.824  49.335  18.561  1.00 14.12      1tnf N  
ATOM   2710  CZ  ARG B 138      11.270  50.546  18.458  1.00 15.22      1tnf C  
ATOM   2711  NH1 ARG B 138      11.726  51.293  17.488  1.00 17.90      1tnf N1+
ATOM   2712  NH2 ARG B 138      10.288  51.031  19.219  1.00 14.51      1tnf N  
ATOM   2713  HN  ARG B 138      14.308  46.497  22.832  1.00  0.00      1tnf H  
ATOM   2714  HE  ARG B 138      12.552  49.100  17.887  1.00  0.00      1tnf H  
ATOM   2715 1HH1 ARG B 138      11.303  52.218  17.409  1.00  0.00      1tnf H  
ATOM   2716 2HH1 ARG B 138      12.477  50.922  16.906  1.00  0.00      1tnf H  
ATOM   2717 1HH2 ARG B 138       9.865  51.956  19.140  1.00  0.00      1tnf H  
ATOM   2718 2HH2 ARG B 138       9.932  50.448  19.976  1.00  0.00      1tnf H  
ATOM   2719  N   PRO B 139      16.594  46.736  20.139  1.00 10.12      1tnf N  
ATOM   2720  CA  PRO B 139      18.022  46.985  20.018  1.00 13.84      1tnf C  
ATOM   2721  C   PRO B 139      18.333  48.198  19.163  1.00 19.02      1tnf C  
ATOM   2722  O   PRO B 139      19.377  48.826  19.343  1.00 22.06      1tnf O  
ATOM   2723  CB  PRO B 139      18.593  45.713  19.463  1.00 12.74      1tnf C  
ATOM   2724  CG  PRO B 139      17.454  45.275  18.593  1.00 14.74      1tnf C  
ATOM   2725  CD  PRO B 139      16.245  45.477  19.510  1.00 10.02      1tnf C  
ATOM   2726  N   ASP B 140      17.385  48.579  18.282  1.00 18.46      1tnf N  
ATOM   2727  CA  ASP B 140      17.524  49.738  17.431  1.00 14.92      1tnf C  
ATOM   2728  C   ASP B 140      17.625  51.009  18.199  1.00 13.63      1tnf C  
ATOM   2729  O   ASP B 140      17.896  51.995  17.538  1.00 20.32      1tnf O  
ATOM   2730  CB  ASP B 140      16.338  49.871  16.449  1.00 12.25      1tnf C  
ATOM   2731  CG  ASP B 140      14.921  50.097  16.985  1.00 11.72      1tnf C  
ATOM   2732  OD1 ASP B 140      14.372  51.185  16.818  1.00  7.66      1tnf O  
ATOM   2733  OD2 ASP B 140      14.365  49.155  17.538  1.00 13.30      1tnf O1-
ATOM   2734  HN  ASP B 140      16.532  48.024  18.214  1.00  0.00      1tnf H  
ATOM   2735  N   TYR B 141      17.319  51.004  19.501  1.00 16.36      1tnf N  
ATOM   2736  CA  TYR B 141      17.391  52.178  20.378  1.00 17.57      1tnf C  
ATOM   2737  C   TYR B 141      18.556  52.251  21.380  1.00 19.48      1tnf C  
ATOM   2738  O   TYR B 141      18.630  53.244  22.118  1.00 22.36      1tnf O  
ATOM   2739  CB  TYR B 141      16.139  52.332  21.214  1.00 16.73      1tnf C  
ATOM   2740  CG  TYR B 141      14.972  53.029  20.563  1.00 16.34      1tnf C  
ATOM   2741  CD1 TYR B 141      13.716  52.484  20.732  1.00 15.94      1tnf C  
ATOM   2742  CD2 TYR B 141      15.162  54.185  19.825  1.00 18.51      1tnf C  
ATOM   2743  CE1 TYR B 141      12.636  53.101  20.149  1.00 18.49      1tnf C  
ATOM   2744  CE2 TYR B 141      14.078  54.810  19.246  1.00 17.98      1tnf C  
ATOM   2745  CZ  TYR B 141      12.829  54.257  19.420  1.00 19.28      1tnf C  
ATOM   2746  OH  TYR B 141      11.746  54.875  18.844  1.00 23.12      1tnf O  
ATOM   2747  HN  TYR B 141      17.014  50.122  19.913  1.00  0.00      1tnf H  
ATOM   2748  HH  TYR B 141      11.879  55.671  18.342  1.00  0.00      1tnf H  
ATOM   2749  N   LEU B 142      19.461  51.262  21.496  1.00 16.18      1tnf N  
ATOM   2750  CA  LEU B 142      20.589  51.336  22.426  1.00 12.89      1tnf C  
ATOM   2751  C   LEU B 142      21.557  52.503  22.199  1.00 12.26      1tnf C  
ATOM   2752  O   LEU B 142      21.352  53.244  21.235  1.00 11.11      1tnf O  
ATOM   2753  CB  LEU B 142      21.348  50.036  22.333  1.00 11.97      1tnf C  
ATOM   2754  CG  LEU B 142      20.688  48.745  22.732  1.00  9.70      1tnf C  
ATOM   2755  CD1 LEU B 142      21.641  47.615  22.473  1.00 11.84      1tnf C  
ATOM   2756  CD2 LEU B 142      20.404  48.731  24.216  1.00 13.46      1tnf C  
ATOM   2757  HN  LEU B 142      19.357  50.430  20.915  1.00  0.00      1tnf H  
ATOM   2758  N   LEU B 143      22.600  52.702  23.049  1.00  9.83      1tnf N  
ATOM   2759  CA  LEU B 143      23.668  53.706  22.848  1.00  7.63      1tnf C  
ATOM   2760  C   LEU B 143      25.014  53.192  23.365  1.00 10.98      1tnf C  
ATOM   2761  O   LEU B 143      25.136  52.638  24.454  1.00 10.13      1tnf O  
ATOM   2762  CB  LEU B 143      23.288  54.991  23.569  1.00 11.29      1tnf C  
ATOM   2763  CG  LEU B 143      23.944  56.339  23.509  1.00  7.41      1tnf C  
ATOM   2764  CD1 LEU B 143      25.033  56.382  24.542  1.00  8.98      1tnf C  
ATOM   2765  CD2 LEU B 143      24.413  56.629  22.113  1.00 10.33      1tnf C  
ATOM   2766  HN  LEU B 143      22.649  52.118  23.884  1.00  0.00      1tnf H  
ATOM   2767  N   PHE B 144      26.069  53.352  22.560  1.00 13.96      1tnf N  
ATOM   2768  CA  PHE B 144      27.373  52.829  22.903  1.00 15.34      1tnf C  
ATOM   2769  C   PHE B 144      28.547  53.816  22.797  1.00 19.37      1tnf C  
ATOM   2770  O   PHE B 144      29.611  53.418  22.339  1.00 19.47      1tnf O  
ATOM   2771  CB  PHE B 144      27.745  51.581  22.039  1.00 19.20      1tnf C  
ATOM   2772  CG  PHE B 144      26.745  50.459  21.781  1.00 18.35      1tnf C  
ATOM   2773  CD1 PHE B 144      26.006  49.892  22.795  1.00 17.88      1tnf C  
ATOM   2774  CD2 PHE B 144      26.574  50.036  20.471  1.00 20.96      1tnf C  
ATOM   2775  CE1 PHE B 144      25.091  48.908  22.481  1.00 22.52      1tnf C  
ATOM   2776  CE2 PHE B 144      25.662  49.053  20.155  1.00 18.50      1tnf C  
ATOM   2777  CZ  PHE B 144      24.917  48.490  21.153  1.00 22.44      1tnf C  
ATOM   2778  HN  PHE B 144      25.951  53.856  21.681  1.00  0.00      1tnf H  
ATOM   2779  N   ALA B 145      28.526  55.121  23.145  1.00 21.13      1tnf N  
ATOM   2780  CA  ALA B 145      29.808  55.807  23.428  1.00 22.43      1tnf C  
ATOM   2781  C   ALA B 145      29.937  55.656  24.963  1.00 22.82      1tnf C  
ATOM   2782  O   ALA B 145      30.342  56.472  25.780  1.00 24.71      1tnf O  
ATOM   2783  CB  ALA B 145      29.746  57.286  23.072  1.00 23.47      1tnf C  
ATOM   2784  HN  ALA B 145      27.642  55.626  23.212  1.00  0.00      1tnf H  
ATOM   2785  N   GLU B 146      29.646  54.433  25.294  1.00 24.24      1tnf N  
ATOM   2786  CA  GLU B 146      29.356  53.884  26.564  1.00 27.42      1tnf C  
ATOM   2787  C   GLU B 146      30.584  53.178  27.001  1.00 29.52      1tnf C  
ATOM   2788  O   GLU B 146      31.305  52.644  26.154  1.00 33.20      1tnf O  
ATOM   2789  CB  GLU B 146      28.228  52.900  26.367  1.00 28.65      1tnf C  
ATOM   2790  CG  GLU B 146      28.238  51.442  26.841  1.00 29.53      1tnf C  
ATOM   2791  CD  GLU B 146      28.752  50.371  25.882  1.00 30.66      1tnf C  
ATOM   2792  OE1 GLU B 146      29.035  50.664  24.721  1.00 33.80      1tnf O  
ATOM   2793  OE2 GLU B 146      28.877  49.225  26.315  1.00 31.53      1tnf O1-
ATOM   2794  HN  GLU B 146      29.624  53.769  24.520  1.00  0.00      1tnf H  
ATOM   2795  N   SER B 147      30.886  53.212  28.277  1.00 30.60      1tnf N  
ATOM   2796  CA  SER B 147      31.768  52.150  28.663  1.00 33.59      1tnf C  
ATOM   2797  C   SER B 147      30.797  51.373  29.540  1.00 34.91      1tnf C  
ATOM   2798  O   SER B 147      30.161  50.412  29.062  1.00 40.00      1tnf O  
ATOM   2799  CB  SER B 147      32.942  52.685  29.400  1.00 34.73      1tnf C  
ATOM   2800  OG  SER B 147      33.839  53.448  28.621  1.00 35.61      1tnf O  
ATOM   2801  HN  SER B 147      30.532  53.917  28.924  1.00  0.00      1tnf H  
ATOM   2802  HG  SER B 147      34.590  53.790  29.092  1.00  0.00      1tnf H  
ATOM   2803  N   GLY B 148      30.520  51.768  30.777  1.00 30.15      1tnf N  
ATOM   2804  CA  GLY B 148      29.521  50.991  31.479  1.00 27.62      1tnf C  
ATOM   2805  C   GLY B 148      28.215  51.630  31.116  1.00 25.69      1tnf C  
ATOM   2806  O   GLY B 148      28.084  52.750  31.574  1.00 27.68      1tnf O  
ATOM   2807  HN  GLY B 148      30.983  52.569  31.206  1.00  0.00      1tnf H  
ATOM   2808  N   GLN B 149      27.408  51.135  30.165  1.00 20.32      1tnf N  
ATOM   2809  CA  GLN B 149      26.032  51.625  29.932  1.00 14.85      1tnf C  
ATOM   2810  C   GLN B 149      25.230  50.398  29.531  1.00 16.65      1tnf C  
ATOM   2811  O   GLN B 149      24.004  50.295  29.759  1.00 18.96      1tnf O  
ATOM   2812  CB  GLN B 149      25.872  52.694  28.796  1.00 11.58      1tnf C  
ATOM   2813  CG  GLN B 149      26.493  54.112  29.075  1.00 10.86      1tnf C  
ATOM   2814  CD  GLN B 149      26.482  55.169  27.972  1.00 10.83      1tnf C  
ATOM   2815  NE2 GLN B 149      26.977  56.423  27.970  1.00  9.37      1tnf N  
ATOM   2816  OE1 GLN B 149      25.962  54.845  26.923  1.00 16.40      1tnf O  
ATOM   2817  HN  GLN B 149      27.761  50.383  29.573  1.00  0.00      1tnf H  
ATOM   2818 1HE2 GLN B 149      27.414  56.695  28.851  1.00  0.00      1tnf H  
ATOM   2819 2HE2 GLN B 149      26.970  57.129  27.234  1.00  0.00      1tnf H  
ATOM   2820  N   VAL B 150      25.931  49.397  28.956  1.00 12.52      1tnf N  
ATOM   2821  CA  VAL B 150      25.289  48.171  28.575  1.00 10.77      1tnf C  
ATOM   2822  C   VAL B 150      26.148  47.128  29.225  1.00 11.88      1tnf C  
ATOM   2823  O   VAL B 150      27.335  47.151  28.941  1.00 14.56      1tnf O  
ATOM   2824  CB  VAL B 150      25.263  48.018  27.014  1.00 10.71      1tnf C  
ATOM   2825  CG1 VAL B 150      24.191  46.985  26.638  1.00  8.87      1tnf C  
ATOM   2826  CG2 VAL B 150      24.889  49.340  26.322  1.00  7.79      1tnf C  
ATOM   2827  HN  VAL B 150      26.931  49.514  28.790  1.00  0.00      1tnf H  
ATOM   2828  N   TYR B 151      25.633  46.275  30.117  1.00 14.87      1tnf N  
ATOM   2829  CA  TYR B 151      26.370  45.206  30.778  1.00 13.08      1tnf C  
ATOM   2830  C   TYR B 151      25.407  44.155  31.260  1.00 11.39      1tnf C  
ATOM   2831  O   TYR B 151      24.186  44.379  31.331  1.00  9.56      1tnf O  
ATOM   2832  CB  TYR B 151      27.201  45.600  32.036  1.00 15.19      1tnf C  
ATOM   2833  CG  TYR B 151      26.656  46.581  33.086  1.00 15.22      1tnf C  
ATOM   2834  CD1 TYR B 151      26.767  47.949  32.800  1.00 14.61      1tnf C  
ATOM   2835  CD2 TYR B 151      26.083  46.152  34.267  1.00 10.81      1tnf C  
ATOM   2836  CE1 TYR B 151      26.309  48.876  33.683  1.00 13.40      1tnf C  
ATOM   2837  CE2 TYR B 151      25.615  47.096  35.168  1.00 12.86      1tnf C  
ATOM   2838  CZ  TYR B 151      25.728  48.449  34.864  1.00 12.90      1tnf C  
ATOM   2839  OH  TYR B 151      25.185  49.435  35.677  1.00 13.88      1tnf O  
ATOM   2840  HN  TYR B 151      24.646  46.381  30.353  1.00  0.00      1tnf H  
ATOM   2841  HH  TYR B 151      25.262  50.359  35.469  1.00  0.00      1tnf H  
ATOM   2842  N   PHE B 152      26.050  42.996  31.483  1.00  9.09      1tnf N  
ATOM   2843  CA  PHE B 152      25.432  41.785  31.981  1.00  8.61      1tnf C  
ATOM   2844  C   PHE B 152      26.458  41.074  32.856  1.00 10.15      1tnf C  
ATOM   2845  O   PHE B 152      27.566  40.771  32.392  1.00  7.63      1tnf O  
ATOM   2846  CB  PHE B 152      25.060  40.915  30.823  1.00  9.04      1tnf C  
ATOM   2847  CG  PHE B 152      24.217  39.697  31.112  1.00  8.09      1tnf C  
ATOM   2848  CD1 PHE B 152      23.454  39.592  32.235  1.00  8.58      1tnf C  
ATOM   2849  CD2 PHE B 152      24.163  38.702  30.160  1.00 10.42      1tnf C  
ATOM   2850  CE1 PHE B 152      22.643  38.500  32.386  1.00  8.91      1tnf C  
ATOM   2851  CE2 PHE B 152      23.351  37.620  30.319  1.00  8.99      1tnf C  
ATOM   2852  CZ  PHE B 152      22.594  37.528  31.442  1.00  9.83      1tnf C  
ATOM   2853  HN  PHE B 152      27.050  42.967  31.286  1.00  0.00      1tnf H  
ATOM   2854  N   GLY B 153      26.134  40.823  34.121  1.00 10.96      1tnf N  
ATOM   2855  CA  GLY B 153      27.074  40.143  34.989  1.00 15.44      1tnf C  
ATOM   2856  C   GLY B 153      26.444  39.223  36.039  1.00 17.66      1tnf C  
ATOM   2857  O   GLY B 153      25.336  39.487  36.553  1.00 20.27      1tnf O  
ATOM   2858  HN  GLY B 153      25.223  41.109  34.480  1.00  0.00      1tnf H  
ATOM   2859  N   ILE B 154      27.152  38.137  36.341  1.00 12.60      1tnf N  
ATOM   2860  CA  ILE B 154      26.662  37.251  37.351  1.00 11.01      1tnf C  
ATOM   2861  C   ILE B 154      27.833  37.004  38.253  1.00 13.05      1tnf C  
ATOM   2862  O   ILE B 154      28.975  36.888  37.758  1.00 18.22      1tnf O  
ATOM   2863  CB  ILE B 154      26.159  35.882  36.806  1.00  8.34      1tnf C  
ATOM   2864  CG1 ILE B 154      27.124  35.257  35.852  1.00  4.38      1tnf C  
ATOM   2865  CG2 ILE B 154      24.819  36.090  36.155  1.00  8.89      1tnf C  
ATOM   2866  CD1 ILE B 154      26.967  33.761  36.159  1.00  7.63      1tnf C  
ATOM   2867  HN  ILE B 154      28.030  37.940  35.860  1.00  0.00      1tnf H  
ATOM   2868  N   ILE B 155      27.581  36.964  39.555  1.00 13.13      1tnf N  
ATOM   2869  CA  ILE B 155      28.639  36.649  40.529  1.00 13.64      1tnf C  
ATOM   2870  C   ILE B 155      28.064  35.711  41.588  1.00 14.98      1tnf C  
ATOM   2871  O   ILE B 155      26.883  35.760  41.977  1.00 14.09      1tnf O  
ATOM   2872  CB  ILE B 155      29.207  37.995  41.120  1.00 10.25      1tnf C  
ATOM   2873  CG1 ILE B 155      30.364  37.822  42.090  1.00  8.24      1tnf C  
ATOM   2874  CG2 ILE B 155      28.049  38.677  41.791  1.00 13.55      1tnf C  
ATOM   2875  CD1 ILE B 155      31.513  36.898  41.684  1.00  6.25      1tnf C  
ATOM   2876  HN  ILE B 155      26.636  37.155  39.888  1.00  0.00      1tnf H  
ATOM   2877  N   ALA B 156      28.919  34.751  41.929  1.00 13.30      1tnf N  
ATOM   2878  CA  ALA B 156      28.534  33.678  42.827  1.00 12.04      1tnf C  
ATOM   2879  C   ALA B 156      28.702  34.050  44.276  1.00 13.00      1tnf C  
ATOM   2880  O   ALA B 156      29.806  34.375  44.695  1.00 15.38      1tnf O  
ATOM   2881  CB  ALA B 156      29.373  32.463  42.572  1.00  7.04      1tnf C  
ATOM   2882  HN  ALA B 156      29.866  34.769  41.551  1.00  0.00      1tnf H  
ATOM   2883  N   LEU B 157      27.601  34.081  44.990  1.00 14.34      1tnf N  
ATOM   2884  CA  LEU B 157      27.618  34.244  46.425  1.00 18.32      1tnf C  
ATOM   2885  C   LEU B 157      27.405  32.879  47.085  1.00 21.17      1tnf C  
ATOM   2886  O   LEU B 157      28.289  32.446  47.813  1.00 27.03      1tnf O  
ATOM   2887  CB  LEU B 157      26.538  35.256  46.767  1.00 15.86      1tnf C  
ATOM   2888  CG  LEU B 157      26.997  36.656  46.381  1.00 17.11      1tnf C  
ATOM   2889  CD1 LEU B 157      25.877  37.691  46.495  1.00 14.80      1tnf C  
ATOM   2890  CD2 LEU B 157      28.217  36.940  47.249  1.00 16.31      1tnf C  
ATOM   2891  OXT LEU B 157      26.408  32.193  46.828  1.00 27.02      1tnf O1-
ATOM   2892  HN  LEU B 157      26.703  33.987  44.515  1.00  0.00      1tnf H  
ATOM   2893  N   ARG C   6      17.900  26.574  48.172  1.00 42.17      1tnf N  
ATOM   2894  CA  ARG C   6      17.929  27.823  48.901  1.00 43.18      1tnf C  
ATOM   2895  C   ARG C   6      19.387  27.796  49.358  1.00 43.67      1tnf C  
ATOM   2896  O   ARG C   6      20.244  28.119  48.535  1.00 40.28      1tnf O  
ATOM   2897  CB  ARG C   6      16.946  27.734  50.037  1.00 44.61      1tnf C  
ATOM   2898  HN1 ARG C   6      18.566  26.634  47.402  1.00  0.00      1tnf H  
ATOM   2899  HN2 ARG C   6      16.962  26.324  47.860  1.00  0.00      1tnf H  
ATOM   2900  HN3 ARG C   6      18.067  25.766  48.772  1.00  0.00      1tnf H  
ATOM   2901  N   THR C   7      19.689  27.308  50.560  1.00 44.00      1tnf N  
ATOM   2902  CA  THR C   7      21.064  26.999  50.946  1.00 46.76      1tnf C  
ATOM   2903  C   THR C   7      21.524  25.896  49.977  1.00 43.43      1tnf C  
ATOM   2904  O   THR C   7      20.722  24.953  49.889  1.00 44.35      1tnf O  
ATOM   2905  CB  THR C   7      21.033  26.518  52.420  1.00 49.19      1tnf C  
ATOM   2906  CG2 THR C   7      22.390  26.694  53.111  1.00 52.39      1tnf C  
ATOM   2907  OG1 THR C   7      20.014  27.276  53.095  1.00 50.57      1tnf O  
ATOM   2908  HN  THR C   7      18.938  27.145  51.231  1.00  0.00      1tnf H  
ATOM   2909  HG1 THR C   7      19.995  26.981  53.998  1.00  0.00      1tnf H  
ATOM   2910  N   PRO C   8      22.612  25.828  49.192  1.00 41.90      1tnf N  
ATOM   2911  CA  PRO C   8      24.003  26.033  49.556  1.00 42.98      1tnf C  
ATOM   2912  C   PRO C   8      24.376  27.489  49.829  1.00 43.50      1tnf C  
ATOM   2913  O   PRO C   8      23.473  28.316  49.928  1.00 45.67      1tnf O  
ATOM   2914  CB  PRO C   8      24.751  25.402  48.386  1.00 42.04      1tnf C  
ATOM   2915  CG  PRO C   8      23.936  25.848  47.201  1.00 40.81      1tnf C  
ATOM   2916  CD  PRO C   8      22.518  25.651  47.741  1.00 42.21      1tnf C  
ATOM   2917  N   SER C   9      25.674  27.819  49.960  1.00 41.66      1tnf N  
ATOM   2918  CA  SER C   9      26.153  29.153  50.309  1.00 41.28      1tnf C  
ATOM   2919  C   SER C   9      25.514  29.704  51.576  1.00 40.04      1tnf C  
ATOM   2920  O   SER C   9      24.618  30.531  51.435  1.00 42.69      1tnf O  
ATOM   2921  CB  SER C   9      25.882  30.103  49.139  1.00 43.13      1tnf C  
ATOM   2922  OG  SER C   9      26.385  29.565  47.915  1.00 47.90      1tnf O  
ATOM   2923  HN  SER C   9      26.369  27.089  49.805  1.00  0.00      1tnf H  
ATOM   2924  HG  SER C   9      26.217  30.154  47.189  1.00  0.00      1tnf H  
ATOM   2925  N   ASP C  10      25.831  29.320  52.833  1.00 38.16      1tnf N  
ATOM   2926  CA  ASP C  10      25.143  29.964  53.962  1.00 37.35      1tnf C  
ATOM   2927  C   ASP C  10      25.527  31.419  54.050  1.00 34.41      1tnf C  
ATOM   2928  O   ASP C  10      26.582  31.902  54.459  1.00 38.80      1tnf O  
ATOM   2929  CB  ASP C  10      25.428  29.447  55.403  1.00 40.01      1tnf C  
ATOM   2930  CG  ASP C  10      24.772  30.298  56.534  1.00 42.13      1tnf C  
ATOM   2931  OD1 ASP C  10      25.414  30.498  57.577  1.00 41.87      1tnf O  
ATOM   2932  OD2 ASP C  10      23.643  30.787  56.371  1.00 43.14      1tnf O1-
ATOM   2933  HN  ASP C  10      26.533  28.598  52.995  1.00  0.00      1tnf H  
ATOM   2934  N   LYS C  11      24.487  32.016  53.580  1.00 28.26      1tnf N  
ATOM   2935  CA  LYS C  11      24.300  33.415  53.550  1.00 22.78      1tnf C  
ATOM   2936  C   LYS C  11      22.860  33.387  54.014  1.00 22.07      1tnf C  
ATOM   2937  O   LYS C  11      22.089  32.578  53.503  1.00 24.37      1tnf O  
ATOM   2938  CB  LYS C  11      24.434  33.870  52.142  1.00 16.10      1tnf C  
ATOM   2939  CG  LYS C  11      25.780  34.482  51.917  1.00 14.79      1tnf C  
ATOM   2940  CD  LYS C  11      26.909  33.516  51.606  1.00 15.52      1tnf C  
ATOM   2941  CE  LYS C  11      28.214  34.273  51.424  1.00 14.31      1tnf C  
ATOM   2942  NZ  LYS C  11      28.509  34.979  52.660  1.00 21.42      1tnf N1+
ATOM   2943  HN  LYS C  11      23.741  31.433  53.200  1.00  0.00      1tnf H  
ATOM   2944  HZ1 LYS C  11      29.385  35.487  52.538  1.00  0.00      1tnf H  
ATOM   2945  HZ2 LYS C  11      28.524  34.361  53.471  1.00  0.00      1tnf H  
ATOM   2946  HZ3 LYS C  11      27.743  35.583  52.960  1.00  0.00      1tnf H  
ATOM   2947  N   PRO C  12      22.428  34.187  54.997  1.00 19.13      1tnf N  
ATOM   2948  CA  PRO C  12      21.169  34.918  54.927  1.00 15.78      1tnf C  
ATOM   2949  C   PRO C  12      21.010  35.364  53.487  1.00 13.23      1tnf C  
ATOM   2950  O   PRO C  12      21.935  35.898  52.846  1.00 17.95      1tnf O  
ATOM   2951  CB  PRO C  12      21.361  36.027  55.931  1.00 14.71      1tnf C  
ATOM   2952  CG  PRO C  12      22.078  35.280  57.040  1.00 12.42      1tnf C  
ATOM   2953  CD  PRO C  12      23.041  34.337  56.321  1.00 17.59      1tnf C  
ATOM   2954  N   VAL C  13      19.869  35.036  52.946  1.00 12.02      1tnf N  
ATOM   2955  CA  VAL C  13      19.566  35.370  51.586  1.00 12.40      1tnf C  
ATOM   2956  C   VAL C  13      18.071  35.527  51.630  1.00 15.55      1tnf C  
ATOM   2957  O   VAL C  13      17.396  34.818  52.398  1.00 17.45      1tnf O  
ATOM   2958  CB  VAL C  13      20.033  34.206  50.660  1.00 13.59      1tnf C  
ATOM   2959  CG1 VAL C  13      19.551  32.866  51.176  1.00 11.02      1tnf C  
ATOM   2960  CG2 VAL C  13      19.562  34.494  49.247  1.00 14.26      1tnf C  
ATOM   2961  HN  VAL C  13      19.179  34.532  53.502  1.00  0.00      1tnf H  
ATOM   2962  N   ALA C  14      17.570  36.493  50.881  1.00 14.59      1tnf N  
ATOM   2963  CA  ALA C  14      16.136  36.635  50.703  1.00 13.15      1tnf C  
ATOM   2964  C   ALA C  14      16.001  37.398  49.426  1.00 11.88      1tnf C  
ATOM   2965  O   ALA C  14      16.828  38.249  49.084  1.00 13.22      1tnf O  
ATOM   2966  CB  ALA C  14      15.415  37.444  51.802  1.00 10.69      1tnf C  
ATOM   2967  HN  ALA C  14      18.200  37.149  50.421  1.00  0.00      1tnf H  
ATOM   2968  N   HIS C  15      15.027  36.935  48.692  1.00 11.23      1tnf N  
ATOM   2969  CA  HIS C  15      14.632  37.491  47.428  1.00 14.84      1tnf C  
ATOM   2970  C   HIS C  15      13.184  37.127  47.502  1.00 15.83      1tnf C  
ATOM   2971  O   HIS C  15      12.857  35.961  47.376  1.00 12.32      1tnf O  
ATOM   2972  CB  HIS C  15      15.218  36.795  46.205  1.00 16.10      1tnf C  
ATOM   2973  CG  HIS C  15      14.722  37.608  45.032  1.00 16.87      1tnf C  
ATOM   2974  CD2 HIS C  15      13.642  37.315  44.254  1.00 18.02      1tnf C  
ATOM   2975  ND1 HIS C  15      15.166  38.787  44.657  1.00 17.14      1tnf N  
ATOM   2976  CE1 HIS C  15      14.398  39.215  43.702  1.00 16.68      1tnf C  
ATOM   2977  NE2 HIS C  15      13.481  38.332  43.466  1.00 15.42      1tnf N  
ATOM   2978  HN  HIS C  15      14.512  36.125  49.038  1.00  0.00      1tnf H  
ATOM   2979  HD1 HIS C  15      15.971  39.278  45.047  1.00  0.00      1tnf H  
ATOM   2980  HE2 HIS C  15      12.744  38.423  42.767  1.00  0.00      1tnf H  
ATOM   2981  N   VAL C  16      12.350  38.141  47.637  1.00 21.09      1tnf N  
ATOM   2982  CA  VAL C  16      10.938  38.000  47.933  1.00 23.45      1tnf C  
ATOM   2983  C   VAL C  16      10.126  38.813  46.912  1.00 26.40      1tnf C  
ATOM   2984  O   VAL C  16      10.510  39.909  46.481  1.00 28.35      1tnf O  
ATOM   2985  CB  VAL C  16      10.915  38.440  49.431  1.00 24.21      1tnf C  
ATOM   2986  CG1 VAL C  16      10.510  39.928  49.643  1.00 24.95      1tnf C  
ATOM   2987  CG2 VAL C  16      10.123  37.360  50.122  1.00 24.11      1tnf C  
ATOM   2988  HN  VAL C  16      12.723  39.084  47.526  1.00  0.00      1tnf H  
ATOM   2989  N   VAL C  17       9.033  38.220  46.444  1.00 29.90      1tnf N  
ATOM   2990  CA  VAL C  17       8.185  38.773  45.378  1.00 30.35      1tnf C  
ATOM   2991  C   VAL C  17       6.956  39.459  45.943  1.00 30.41      1tnf C  
ATOM   2992  O   VAL C  17       6.597  39.133  47.082  1.00 33.83      1tnf O  
ATOM   2993  CB  VAL C  17       7.672  37.694  44.396  1.00 32.65      1tnf C  
ATOM   2994  CG1 VAL C  17       8.663  37.542  43.248  1.00 33.18      1tnf C  
ATOM   2995  CG2 VAL C  17       7.420  36.367  45.156  1.00 35.26      1tnf C  
ATOM   2996  HN  VAL C  17       8.765  37.324  46.850  1.00  0.00      1tnf H  
ATOM   2997  N   ALA C  18       6.334  40.413  45.232  1.00 26.84      1tnf N  
ATOM   2998  CA  ALA C  18       5.145  41.076  45.762  1.00 26.65      1tnf C  
ATOM   2999  C   ALA C  18       3.950  40.161  45.620  1.00 28.11      1tnf C  
ATOM   3000  O   ALA C  18       4.133  38.967  45.359  1.00 29.80      1tnf O  
ATOM   3001  CB  ALA C  18       4.829  42.361  45.017  1.00 26.41      1tnf C  
ATOM   3002  HN  ALA C  18       6.694  40.677  44.315  1.00  0.00      1tnf H  
ATOM   3003  N   ASN C  19       2.711  40.636  45.738  1.00 28.86      1tnf N  
ATOM   3004  CA  ASN C  19       1.609  39.697  45.609  1.00 32.47      1tnf C  
ATOM   3005  C   ASN C  19       0.471  40.235  44.776  1.00 33.38      1tnf C  
ATOM   3006  O   ASN C  19      -0.161  41.216  45.188  1.00 32.46      1tnf O  
ATOM   3007  CB  ASN C  19       1.126  39.319  47.000  1.00 32.42      1tnf C  
ATOM   3008  CG  ASN C  19      -0.106  38.445  47.018  1.00 31.95      1tnf C  
ATOM   3009  ND2 ASN C  19       0.044  37.190  47.423  1.00 30.85      1tnf N  
ATOM   3010  OD1 ASN C  19      -1.203  38.918  46.723  1.00 32.97      1tnf O  
ATOM   3011  HN  ASN C  19       2.541  41.626  45.913  1.00  0.00      1tnf H  
ATOM   3012 1HD2 ASN C  19      -0.788  36.600  47.435  1.00  0.00      1tnf H  
ATOM   3013 2HD2 ASN C  19       0.953  36.798  47.668  1.00  0.00      1tnf H  
ATOM   3014  N   PRO C  20       0.183  39.605  43.619  1.00 35.64      1tnf N  
ATOM   3015  CA  PRO C  20      -0.828  40.026  42.649  1.00 37.72      1tnf C  
ATOM   3016  C   PRO C  20      -2.241  39.625  43.035  1.00 40.04      1tnf C  
ATOM   3017  O   PRO C  20      -3.026  39.161  42.204  1.00 40.20      1tnf O  
ATOM   3018  CB  PRO C  20      -0.395  39.401  41.357  1.00 36.52      1tnf C  
ATOM   3019  CG  PRO C  20       0.139  38.071  41.833  1.00 37.06      1tnf C  
ATOM   3020  CD  PRO C  20       0.906  38.440  43.100  1.00 36.71      1tnf C  
ATOM   3021  N   GLN C  21      -2.537  39.720  44.329  1.00 41.30      1tnf N  
ATOM   3022  CA  GLN C  21      -3.837  39.425  44.841  1.00 40.11      1tnf C  
ATOM   3023  C   GLN C  21      -4.201  40.644  45.657  1.00 40.68      1tnf C  
ATOM   3024  O   GLN C  21      -5.351  41.082  45.550  1.00 42.39      1tnf O  
ATOM   3025  CB  GLN C  21      -3.788  38.162  45.698  1.00 39.07      1tnf C  
ATOM   3026  CG  GLN C  21      -3.798  36.824  44.933  1.00 40.79      1tnf C  
ATOM   3027  CD  GLN C  21      -2.784  36.553  43.805  1.00 40.22      1tnf C  
ATOM   3028  NE2 GLN C  21      -3.250  36.323  42.577  1.00 38.22      1tnf N  
ATOM   3029  OE1 GLN C  21      -1.560  36.558  43.992  1.00 37.07      1tnf O  
ATOM   3030  HN  GLN C  21      -1.808  40.014  44.979  1.00  0.00      1tnf H  
ATOM   3031 1HE2 GLN C  21      -4.258  36.319  42.423  1.00  0.00      1tnf H  
ATOM   3032 2HE2 GLN C  21      -2.579  36.144  41.830  1.00  0.00      1tnf H  
ATOM   3033  N   ALA C  22      -3.334  41.325  46.413  1.00 41.82      1tnf N  
ATOM   3034  CA  ALA C  22      -3.848  42.418  47.254  1.00 43.12      1tnf C  
ATOM   3035  C   ALA C  22      -4.238  43.704  46.498  1.00 43.33      1tnf C  
ATOM   3036  O   ALA C  22      -3.504  44.687  46.664  1.00 41.53      1tnf O  
ATOM   3037  CB  ALA C  22      -2.778  42.692  48.323  1.00 43.18      1tnf C  
ATOM   3038  HN  ALA C  22      -2.341  41.093  46.407  1.00  0.00      1tnf H  
ATOM   3039  N   GLU C  23      -5.423  43.742  45.803  1.00 42.23      1tnf N  
ATOM   3040  CA  GLU C  23      -5.783  44.762  44.787  1.00 44.53      1tnf C  
ATOM   3041  C   GLU C  23      -4.987  46.065  44.663  1.00 45.16      1tnf C  
ATOM   3042  O   GLU C  23      -4.790  46.445  43.497  1.00 44.06      1tnf O  
ATOM   3043  CB  GLU C  23      -7.252  45.267  44.817  1.00 43.85      1tnf C  
ATOM   3044  CG  GLU C  23      -7.607  45.437  43.297  1.00 46.49      1tnf C  
ATOM   3045  CD  GLU C  23      -8.636  46.469  42.770  1.00 48.53      1tnf C  
ATOM   3046  OE1 GLU C  23      -8.335  47.675  42.701  1.00 47.94      1tnf O  
ATOM   3047  OE2 GLU C  23      -9.733  46.060  42.354  1.00 49.17      1tnf O1-
ATOM   3048  HN  GLU C  23      -6.108  43.013  46.001  1.00  0.00      1tnf H  
ATOM   3049  N   GLY C  24      -4.565  46.728  45.772  1.00 43.25      1tnf N  
ATOM   3050  CA  GLY C  24      -3.629  47.866  45.786  1.00 41.65      1tnf C  
ATOM   3051  C   GLY C  24      -2.805  47.802  47.081  1.00 39.21      1tnf C  
ATOM   3052  O   GLY C  24      -3.289  48.311  48.089  1.00 38.28      1tnf O  
ATOM   3053  HN  GLY C  24      -4.927  46.411  46.671  1.00  0.00      1tnf H  
ATOM   3054  N   GLN C  25      -1.614  47.179  47.185  1.00 38.48      1tnf N  
ATOM   3055  CA  GLN C  25      -0.919  47.029  48.464  1.00 35.67      1tnf C  
ATOM   3056  C   GLN C  25       0.608  46.842  48.676  1.00 35.85      1tnf C  
ATOM   3057  O   GLN C  25       1.190  47.629  49.427  1.00 40.02      1tnf O  
ATOM   3058  CB  GLN C  25      -1.588  45.928  49.148  1.00 35.27      1tnf C  
ATOM   3059  CG  GLN C  25      -1.474  46.056  50.645  1.00 36.67      1tnf C  
ATOM   3060  CD  GLN C  25      -2.359  44.977  51.202  1.00 36.71      1tnf C  
ATOM   3061  NE2 GLN C  25      -3.649  45.224  51.150  1.00 35.89      1tnf N  
ATOM   3062  OE1 GLN C  25      -1.926  43.901  51.614  1.00 40.45      1tnf O  
ATOM   3063  HN  GLN C  25      -1.182  46.799  46.343  1.00  0.00      1tnf H  
ATOM   3064 1HE2 GLN C  25      -4.250  44.492  51.528  1.00  0.00      1tnf H  
ATOM   3065 2HE2 GLN C  25      -4.008  46.116  50.809  1.00  0.00      1tnf H  
ATOM   3066  N   LEU C  26       1.283  45.824  48.100  1.00 32.36      1tnf N  
ATOM   3067  CA  LEU C  26       2.703  45.400  48.264  1.00 28.26      1tnf C  
ATOM   3068  C   LEU C  26       2.970  44.402  49.400  1.00 26.63      1tnf C  
ATOM   3069  O   LEU C  26       3.788  44.593  50.307  1.00 24.76      1tnf O  
ATOM   3070  CB  LEU C  26       3.715  46.555  48.501  1.00 25.98      1tnf C  
ATOM   3071  CG  LEU C  26       5.167  46.286  48.069  1.00 22.96      1tnf C  
ATOM   3072  CD1 LEU C  26       5.241  46.434  46.589  1.00 21.28      1tnf C  
ATOM   3073  CD2 LEU C  26       6.132  47.349  48.563  1.00 25.31      1tnf C  
ATOM   3074  HN  LEU C  26       0.736  45.257  47.452  1.00  0.00      1tnf H  
ATOM   3075  N   GLN C  27       2.283  43.265  49.297  1.00 26.02      1tnf N  
ATOM   3076  CA  GLN C  27       2.396  42.182  50.268  1.00 29.26      1tnf C  
ATOM   3077  C   GLN C  27       3.587  41.381  49.777  1.00 29.18      1tnf C  
ATOM   3078  O   GLN C  27       3.621  41.127  48.570  1.00 32.27      1tnf O  
ATOM   3079  CB  GLN C  27       1.123  41.380  50.216  1.00 31.09      1tnf C  
ATOM   3080  CG  GLN C  27       0.816  40.406  51.330  1.00 35.31      1tnf C  
ATOM   3081  CD  GLN C  27      -0.410  39.537  50.972  1.00 38.29      1tnf C  
ATOM   3082  NE2 GLN C  27      -0.248  38.298  50.479  1.00 40.60      1tnf N  
ATOM   3083  OE1 GLN C  27      -1.560  39.953  51.120  1.00 38.48      1tnf O  
ATOM   3084  HN  GLN C  27       1.651  43.147  48.505  1.00  0.00      1tnf H  
ATOM   3085 1HE2 GLN C  27      -1.058  37.724  50.243  1.00  0.00      1tnf H  
ATOM   3086 2HE2 GLN C  27       0.704  37.954  50.356  1.00  0.00      1tnf H  
ATOM   3087  N   TRP C  28       4.589  41.041  50.586  1.00 28.15      1tnf N  
ATOM   3088  CA  TRP C  28       5.689  40.267  50.067  1.00 28.04      1tnf C  
ATOM   3089  C   TRP C  28       5.332  38.808  50.211  1.00 31.26      1tnf C  
ATOM   3090  O   TRP C  28       4.605  38.382  51.115  1.00 33.39      1tnf O  
ATOM   3091  CB  TRP C  28       6.993  40.600  50.799  1.00 25.10      1tnf C  
ATOM   3092  CG  TRP C  28       7.476  41.995  50.438  1.00 22.68      1tnf C  
ATOM   3093  CD1 TRP C  28       7.716  42.882  51.423  1.00 25.68      1tnf C  
ATOM   3094  CD2 TRP C  28       7.694  42.550  49.204  1.00 26.16      1tnf C  
ATOM   3095  CE2 TRP C  28       8.076  43.840  49.535  1.00 25.57      1tnf C  
ATOM   3096  CE3 TRP C  28       7.648  42.213  47.864  1.00 28.84      1tnf C  
ATOM   3097  NE1 TRP C  28       8.077  43.992  50.843  1.00 24.30      1tnf N  
ATOM   3098  CZ2 TRP C  28       8.395  44.780  48.594  1.00 27.03      1tnf C  
ATOM   3099  CZ3 TRP C  28       7.967  43.152  46.903  1.00 28.44      1tnf C  
ATOM   3100  CH2 TRP C  28       8.340  44.424  47.261  1.00 27.26      1tnf C  
ATOM   3101  HN  TRP C  28       4.578  41.326  51.565  1.00  0.00      1tnf H  
ATOM   3102  HE1 TRP C  28       8.324  44.853  51.331  1.00  0.00      1tnf H  
ATOM   3103  N   LEU C  29       5.862  38.006  49.316  1.00 34.01      1tnf N  
ATOM   3104  CA  LEU C  29       5.390  36.655  49.154  1.00 37.05      1tnf C  
ATOM   3105  C   LEU C  29       6.616  35.775  49.201  1.00 39.41      1tnf C  
ATOM   3106  O   LEU C  29       7.685  36.193  48.724  1.00 41.81      1tnf O  
ATOM   3107  CB  LEU C  29       4.684  36.654  47.805  1.00 37.92      1tnf C  
ATOM   3108  CG  LEU C  29       3.709  35.628  47.242  1.00 38.39      1tnf C  
ATOM   3109  CD1 LEU C  29       4.452  34.375  46.700  1.00 36.18      1tnf C  
ATOM   3110  CD2 LEU C  29       2.647  35.448  48.309  1.00 35.60      1tnf C  
ATOM   3111  HN  LEU C  29       6.621  38.346  48.725  1.00  0.00      1tnf H  
ATOM   3112  N   ASN C  30       6.480  34.580  49.785  1.00 41.21      1tnf N  
ATOM   3113  CA  ASN C  30       7.559  33.612  49.771  1.00 42.27      1tnf C  
ATOM   3114  C   ASN C  30       7.121  32.253  49.200  1.00 41.63      1tnf C  
ATOM   3115  O   ASN C  30       6.007  31.797  49.471  1.00 39.24      1tnf O  
ATOM   3116  CB  ASN C  30       8.083  33.424  51.164  1.00 44.88      1tnf C  
ATOM   3117  CG  ASN C  30       9.227  32.415  51.155  1.00 47.94      1tnf C  
ATOM   3118  ND2 ASN C  30       9.241  31.482  52.086  1.00 52.16      1tnf N  
ATOM   3119  OD1 ASN C  30      10.113  32.394  50.300  1.00 46.75      1tnf O  
ATOM   3120  HN  ASN C  30       5.602  34.345  50.248  1.00  0.00      1tnf H  
ATOM   3121 1HD2 ASN C  30       8.507  31.499  52.794  1.00  0.00      1tnf H  
ATOM   3122 2HD2 ASN C  30      10.006  30.807  52.080  1.00  0.00      1tnf H  
ATOM   3123  N   ARG C  31       8.030  31.695  48.389  1.00 41.80      1tnf N  
ATOM   3124  CA  ARG C  31       8.021  30.433  47.647  1.00 46.41      1tnf C  
ATOM   3125  C   ARG C  31       8.030  30.460  46.127  1.00 47.46      1tnf C  
ATOM   3126  O   ARG C  31       8.484  29.466  45.534  1.00 48.31      1tnf O  
ATOM   3127  CB  ARG C  31       6.854  29.507  47.961  1.00 48.87      1tnf C  
ATOM   3128  CG  ARG C  31       7.371  28.227  48.613  1.00 49.23      1tnf C  
ATOM   3129  CD  ARG C  31       6.377  27.737  49.678  1.00 50.55      1tnf C  
ATOM   3130  NE  ARG C  31       5.993  28.840  50.549  1.00 51.29      1tnf N  
ATOM   3131  CZ  ARG C  31       6.866  29.523  51.326  1.00 50.05      1tnf C  
ATOM   3132  NH1 ARG C  31       6.410  30.563  52.032  1.00 49.46      1tnf N1+
ATOM   3133  NH2 ARG C  31       8.161  29.212  51.396  1.00 45.67      1tnf N  
ATOM   3134  HN  ARG C  31       8.879  32.247  48.267  1.00  0.00      1tnf H  
ATOM   3135  HE  ARG C  31       5.011  29.113  50.575  1.00  0.00      1tnf H  
ATOM   3136 1HH1 ARG C  31       7.068  31.078  52.617  1.00  0.00      1tnf H  
ATOM   3137 2HH1 ARG C  31       5.420  30.801  51.978  1.00  0.00      1tnf H  
ATOM   3138 1HH2 ARG C  31       8.819  29.727  51.981  1.00  0.00      1tnf H  
ATOM   3139 2HH2 ARG C  31       8.509  28.419  50.857  1.00  0.00      1tnf H  
ATOM   3140  N   ARG C  32       7.512  31.517  45.458  1.00 49.04      1tnf N  
ATOM   3141  CA  ARG C  32       7.527  31.646  43.976  1.00 49.36      1tnf C  
ATOM   3142  C   ARG C  32       8.904  31.235  43.413  1.00 50.65      1tnf C  
ATOM   3143  O   ARG C  32       9.910  31.412  44.118  1.00 50.82      1tnf O  
ATOM   3144  CB  ARG C  32       7.210  33.110  43.604  1.00 49.22      1tnf C  
ATOM   3145  CG  ARG C  32       6.738  33.439  42.166  1.00 49.36      1tnf C  
ATOM   3146  CD  ARG C  32       5.361  34.182  42.110  1.00 47.99      1tnf C  
ATOM   3147  NE  ARG C  32       5.368  35.592  42.504  1.00 48.04      1tnf N  
ATOM   3148  CZ  ARG C  32       4.372  36.473  42.276  1.00 48.24      1tnf C  
ATOM   3149  NH1 ARG C  32       4.544  37.717  42.696  1.00 50.59      1tnf N1+
ATOM   3150  NH2 ARG C  32       3.220  36.207  41.658  1.00 46.20      1tnf N  
ATOM   3151  HN  ARG C  32       7.087  32.268  46.001  1.00  0.00      1tnf H  
ATOM   3152  HE  ARG C  32       6.195  35.937  42.992  1.00  0.00      1tnf H  
ATOM   3153 1HH1 ARG C  32       5.425  37.920  43.169  1.00  0.00      1tnf H  
ATOM   3154 2HH1 ARG C  32       3.791  38.383  42.524  1.00  0.00      1tnf H  
ATOM   3155 1HH2 ARG C  32       3.088  35.249  41.334  1.00  0.00      1tnf H  
ATOM   3156 2HH2 ARG C  32       2.467  36.873  41.486  1.00  0.00      1tnf H  
ATOM   3157  N   ALA C  33       8.950  30.719  42.159  1.00 51.95      1tnf N  
ATOM   3158  CA  ALA C  33      10.112  30.064  41.506  1.00 48.95      1tnf C  
ATOM   3159  C   ALA C  33      11.442  30.314  42.166  1.00 46.10      1tnf C  
ATOM   3160  O   ALA C  33      12.147  29.370  42.535  1.00 47.45      1tnf O  
ATOM   3161  CB  ALA C  33      10.272  30.480  40.036  1.00 48.71      1tnf C  
ATOM   3162  HN  ALA C  33       8.096  30.788  41.606  1.00  0.00      1tnf H  
ATOM   3163  N   ASN C  34      11.713  31.607  42.344  1.00 40.46      1tnf N  
ATOM   3164  CA  ASN C  34      12.859  31.984  43.106  1.00 37.03      1tnf C  
ATOM   3165  C   ASN C  34      12.406  33.126  43.985  1.00 36.10      1tnf C  
ATOM   3166  O   ASN C  34      12.081  34.239  43.571  1.00 36.00      1tnf O  
ATOM   3167  CB  ASN C  34      13.991  32.451  42.235  1.00 37.43      1tnf C  
ATOM   3168  CG  ASN C  34      15.284  32.312  43.027  1.00 36.53      1tnf C  
ATOM   3169  ND2 ASN C  34      15.796  31.072  43.010  1.00 35.51      1tnf N  
ATOM   3170  OD1 ASN C  34      15.816  33.263  43.623  1.00 32.54      1tnf O  
ATOM   3171  HN  ASN C  34      11.107  32.320  41.939  1.00  0.00      1tnf H  
ATOM   3172 1HD2 ASN C  34      15.359  30.291  42.521  1.00  0.00      1tnf H  
ATOM   3173 2HD2 ASN C  34      16.662  30.979  43.541  1.00  0.00      1tnf H  
ATOM   3174  N   ALA C  35      12.145  32.663  45.177  1.00 33.55      1tnf N  
ATOM   3175  CA  ALA C  35      11.863  33.504  46.296  1.00 32.99      1tnf C  
ATOM   3176  C   ALA C  35      12.524  32.752  47.460  1.00 32.29      1tnf C  
ATOM   3177  O   ALA C  35      12.059  31.799  48.095  1.00 29.03      1tnf O  
ATOM   3178  CB  ALA C  35      10.366  33.654  46.558  1.00 29.94      1tnf C  
ATOM   3179  HN  ALA C  35      12.142  31.652  45.316  1.00  0.00      1tnf H  
ATOM   3180  N   LEU C  36      13.795  33.119  47.544  1.00 29.32      1tnf N  
ATOM   3181  CA  LEU C  36      14.670  32.619  48.565  1.00 27.17      1tnf C  
ATOM   3182  C   LEU C  36      14.320  33.247  49.904  1.00 25.72      1tnf C  
ATOM   3183  O   LEU C  36      14.298  34.465  50.046  1.00 23.60      1tnf O  
ATOM   3184  CB  LEU C  36      16.101  32.959  48.164  1.00 24.90      1tnf C  
ATOM   3185  CG  LEU C  36      17.057  31.974  47.479  1.00 25.93      1tnf C  
ATOM   3186  CD1 LEU C  36      17.857  31.275  48.556  1.00 28.45      1tnf C  
ATOM   3187  CD2 LEU C  36      16.325  30.943  46.630  1.00 28.23      1tnf C  
ATOM   3188  HN  LEU C  36      14.163  33.779  46.859  1.00  0.00      1tnf H  
ATOM   3189  N   LEU C  37      13.921  32.452  50.867  1.00 25.19      1tnf N  
ATOM   3190  CA  LEU C  37      13.882  32.933  52.234  1.00 24.66      1tnf C  
ATOM   3191  C   LEU C  37      14.607  31.743  52.854  1.00 24.34      1tnf C  
ATOM   3192  O   LEU C  37      14.082  30.624  52.985  1.00 25.50      1tnf O  
ATOM   3193  CB  LEU C  37      12.464  33.039  52.817  1.00 26.85      1tnf C  
ATOM   3194  CG  LEU C  37      12.351  33.902  54.077  1.00 27.39      1tnf C  
ATOM   3195  CD1 LEU C  37      12.073  35.336  53.645  1.00 27.35      1tnf C  
ATOM   3196  CD2 LEU C  37      11.252  33.395  54.982  1.00 27.22      1tnf C  
ATOM   3197  HN  LEU C  37      13.638  31.495  50.655  1.00  0.00      1tnf H  
ATOM   3198  N   ALA C  38      15.883  31.902  53.122  1.00 17.92      1tnf N  
ATOM   3199  CA  ALA C  38      16.582  30.767  53.645  1.00 17.81      1tnf C  
ATOM   3200  C   ALA C  38      17.649  31.318  54.518  1.00 20.08      1tnf C  
ATOM   3201  O   ALA C  38      17.993  32.506  54.524  1.00 19.68      1tnf O  
ATOM   3202  CB  ALA C  38      17.240  29.927  52.568  1.00 14.86      1tnf C  
ATOM   3203  HN  ALA C  38      16.354  32.793  52.965  1.00  0.00      1tnf H  
ATOM   3204  N   ASN C  39      17.904  30.297  55.331  1.00 19.67      1tnf N  
ATOM   3205  CA  ASN C  39      18.812  30.262  56.435  1.00 18.57      1tnf C  
ATOM   3206  C   ASN C  39      19.019  31.508  57.247  1.00 18.19      1tnf C  
ATOM   3207  O   ASN C  39      20.002  32.255  57.173  1.00 20.61      1tnf O  
ATOM   3208  CB  ASN C  39      20.191  29.711  55.984  1.00 20.66      1tnf C  
ATOM   3209  CG  ASN C  39      20.779  29.952  54.611  1.00 22.11      1tnf C  
ATOM   3210  ND2 ASN C  39      22.062  29.750  54.410  1.00 21.62      1tnf N  
ATOM   3211  OD1 ASN C  39      20.095  30.131  53.612  1.00 22.25      1tnf O  
ATOM   3212  HN  ASN C  39      17.390  29.436  55.145  1.00  0.00      1tnf H  
ATOM   3213 1HD2 ASN C  39      22.632  29.601  55.243  1.00  0.00      1tnf H  
ATOM   3214 2HD2 ASN C  39      22.458  29.912  53.484  1.00  0.00      1tnf H  
ATOM   3215  N   GLY C  40      18.014  31.717  58.064  1.00 15.23      1tnf N  
ATOM   3216  CA  GLY C  40      18.186  32.747  59.060  1.00 19.94      1tnf C  
ATOM   3217  C   GLY C  40      17.144  33.822  58.955  1.00 23.12      1tnf C  
ATOM   3218  O   GLY C  40      16.406  34.081  59.911  1.00 24.98      1tnf O  
ATOM   3219  HN  GLY C  40      17.151  31.177  57.998  1.00  0.00      1tnf H  
ATOM   3220  N   VAL C  41      17.126  34.469  57.786  1.00 23.21      1tnf N  
ATOM   3221  CA  VAL C  41      16.161  35.532  57.599  1.00 23.04      1tnf C  
ATOM   3222  C   VAL C  41      14.816  34.846  57.460  1.00 24.16      1tnf C  
ATOM   3223  O   VAL C  41      14.705  33.683  57.045  1.00 27.36      1tnf O  
ATOM   3224  CB  VAL C  41      16.496  36.494  56.347  1.00 18.96      1tnf C  
ATOM   3225  CG1 VAL C  41      17.683  36.008  55.565  1.00 20.24      1tnf C  
ATOM   3226  CG2 VAL C  41      15.303  36.626  55.441  1.00 18.99      1tnf C  
ATOM   3227  HN  VAL C  41      17.778  34.220  57.042  1.00  0.00      1tnf H  
ATOM   3228  N   GLU C  42      13.862  35.617  57.950  1.00 24.71      1tnf N  
ATOM   3229  CA  GLU C  42      12.466  35.259  58.054  1.00 27.89      1tnf C  
ATOM   3230  C   GLU C  42      11.682  36.423  57.492  1.00 28.24      1tnf C  
ATOM   3231  O   GLU C  42      12.150  37.571  57.481  1.00 30.21      1tnf O  
ATOM   3232  CB  GLU C  42      12.014  35.074  59.531  1.00 28.90      1tnf C  
ATOM   3233  CG  GLU C  42      12.000  33.648  60.088  1.00 30.75      1tnf C  
ATOM   3234  CD  GLU C  42      13.112  33.227  61.059  1.00 33.15      1tnf C  
ATOM   3235  OE1 GLU C  42      13.129  32.037  61.439  1.00 32.71      1tnf O  
ATOM   3236  OE2 GLU C  42      13.942  34.075  61.439  1.00 34.46      1tnf O1-
ATOM   3237  HN  GLU C  42      14.133  36.542  58.283  1.00  0.00      1tnf H  
ATOM   3238  N   LEU C  43      10.493  36.199  56.994  1.00 27.94      1tnf N  
ATOM   3239  CA  LEU C  43       9.673  37.358  56.711  1.00 30.01      1tnf C  
ATOM   3240  C   LEU C  43       8.706  37.235  57.892  1.00 32.51      1tnf C  
ATOM   3241  O   LEU C  43       8.285  36.100  58.195  1.00 35.25      1tnf O  
ATOM   3242  CB  LEU C  43       8.931  37.228  55.359  1.00 27.10      1tnf C  
ATOM   3243  CG  LEU C  43       7.901  38.273  54.902  1.00 24.60      1tnf C  
ATOM   3244  CD1 LEU C  43       8.519  39.573  54.430  1.00 23.27      1tnf C  
ATOM   3245  CD2 LEU C  43       7.195  37.702  53.706  1.00 26.58      1tnf C  
ATOM   3246  HN  LEU C  43      10.159  35.252  56.814  1.00  0.00      1tnf H  
ATOM   3247  N   ARG C  44       8.433  38.295  58.669  1.00 34.11      1tnf N  
ATOM   3248  CA  ARG C  44       7.351  38.223  59.647  1.00 35.31      1tnf C  
ATOM   3249  C   ARG C  44       6.376  39.351  59.305  1.00 32.35      1tnf C  
ATOM   3250  O   ARG C  44       5.899  39.226  58.185  1.00 31.34      1tnf O  
ATOM   3251  CB  ARG C  44       7.946  38.281  61.073  1.00 37.25      1tnf C  
ATOM   3252  CG  ARG C  44       8.319  36.825  61.475  1.00 42.76      1tnf C  
ATOM   3253  CD  ARG C  44       7.251  35.821  62.104  1.00 49.83      1tnf C  
ATOM   3254  NE  ARG C  44       6.000  35.474  61.383  1.00 55.13      1tnf N  
ATOM   3255  CZ  ARG C  44       4.913  34.855  61.955  1.00 56.02      1tnf C  
ATOM   3256  NH1 ARG C  44       3.787  34.652  61.259  1.00 54.65      1tnf N1+
ATOM   3257  NH2 ARG C  44       4.904  34.388  63.210  1.00 55.68      1tnf N  
ATOM   3258  HN  ARG C  44       8.981  39.150  58.576  1.00  0.00      1tnf H  
ATOM   3259  HE  ARG C  44       5.943  35.712  60.393  1.00  0.00      1tnf H  
ATOM   3260 1HH1 ARG C  44       2.981  34.193  61.683  1.00  0.00      1tnf H  
ATOM   3261 2HH1 ARG C  44       3.794  35.008  60.303  1.00  0.00      1tnf H  
ATOM   3262 1HH2 ARG C  44       4.098  33.929  63.634  1.00  0.00      1tnf H  
ATOM   3263 2HH2 ARG C  44       5.762  34.543  63.740  1.00  0.00      1tnf H  
ATOM   3264  N   ASP C  45       6.009  40.475  59.943  1.00 31.48      1tnf N  
ATOM   3265  CA  ASP C  45       4.893  41.296  59.436  1.00 31.10      1tnf C  
ATOM   3266  C   ASP C  45       5.290  42.240  58.312  1.00 29.88      1tnf C  
ATOM   3267  O   ASP C  45       5.469  43.463  58.474  1.00 29.79      1tnf O  
ATOM   3268  CB  ASP C  45       4.236  42.150  60.536  1.00 34.58      1tnf C  
ATOM   3269  CG  ASP C  45       4.065  41.465  61.905  1.00 38.86      1tnf C  
ATOM   3270  OD1 ASP C  45       3.314  40.479  62.027  1.00 37.59      1tnf O  
ATOM   3271  OD2 ASP C  45       4.703  41.945  62.859  1.00 39.68      1tnf O1-
ATOM   3272  HN  ASP C  45       6.506  40.763  60.786  1.00  0.00      1tnf H  
ATOM   3273  N   ASN C  46       5.394  41.557  57.149  1.00 27.05      1tnf N  
ATOM   3274  CA  ASN C  46       5.753  42.064  55.816  1.00 22.50      1tnf C  
ATOM   3275  C   ASN C  46       7.167  42.636  55.686  1.00 21.01      1tnf C  
ATOM   3276  O   ASN C  46       7.469  43.412  54.773  1.00 15.58      1tnf O  
ATOM   3277  CB  ASN C  46       4.766  43.148  55.395  1.00 19.92      1tnf C  
ATOM   3278  CG  ASN C  46       4.519  43.153  53.920  1.00 18.00      1tnf C  
ATOM   3279  ND2 ASN C  46       4.570  44.343  53.354  1.00 15.94      1tnf N  
ATOM   3280  OD1 ASN C  46       4.249  42.119  53.308  1.00 17.06      1tnf O  
ATOM   3281  HN  ASN C  46       5.197  40.558  57.204  1.00  0.00      1tnf H  
ATOM   3282 1HD2 ASN C  46       4.794  45.199  53.861  1.00  0.00      1tnf H  
ATOM   3283 2HD2 ASN C  46       4.402  44.346  52.348  1.00  0.00      1tnf H  
ATOM   3284  N   GLN C  47       8.046  42.203  56.614  1.00 19.79      1tnf N  
ATOM   3285  CA  GLN C  47       9.427  42.672  56.715  1.00 20.33      1tnf C  
ATOM   3286  C   GLN C  47      10.337  41.489  56.866  1.00 18.55      1tnf C  
ATOM   3287  O   GLN C  47       9.977  40.436  57.408  1.00 20.50      1tnf O  
ATOM   3288  CB  GLN C  47       9.759  43.533  57.941  1.00 21.52      1tnf C  
ATOM   3289  CG  GLN C  47       8.925  44.780  58.145  1.00 21.87      1tnf C  
ATOM   3290  CD  GLN C  47       9.190  45.484  59.459  1.00 19.92      1tnf C  
ATOM   3291  NE2 GLN C  47       8.153  45.813  60.202  1.00 18.84      1tnf N  
ATOM   3292  OE1 GLN C  47      10.327  45.794  59.793  1.00 20.73      1tnf O  
ATOM   3293  HN  GLN C  47       7.727  41.505  57.286  1.00  0.00      1tnf H  
ATOM   3294 1HE2 GLN C  47       8.332  46.287  61.087  1.00  0.00      1tnf H  
ATOM   3295 2HE2 GLN C  47       7.206  45.555  59.924  1.00  0.00      1tnf H  
ATOM   3296  N   LEU C  48      11.543  41.752  56.424  1.00 18.23      1tnf N  
ATOM   3297  CA  LEU C  48      12.581  40.768  56.446  1.00 16.48      1tnf C  
ATOM   3298  C   LEU C  48      13.285  40.982  57.752  1.00 17.02      1tnf C  
ATOM   3299  O   LEU C  48      13.754  42.071  58.084  1.00 17.05      1tnf O  
ATOM   3300  CB  LEU C  48      13.500  40.987  55.236  1.00 15.73      1tnf C  
ATOM   3301  CG  LEU C  48      13.284  40.211  53.936  1.00 16.37      1tnf C  
ATOM   3302  CD1 LEU C  48      11.907  39.561  53.947  1.00 16.51      1tnf C  
ATOM   3303  CD2 LEU C  48      13.435  41.157  52.736  1.00 15.58      1tnf C  
ATOM   3304  HN  LEU C  48      11.746  42.681  56.055  1.00  0.00      1tnf H  
ATOM   3305  N   VAL C  49      13.232  39.950  58.567  1.00 21.44      1tnf N  
ATOM   3306  CA  VAL C  49      13.855  40.046  59.867  1.00 24.21      1tnf C  
ATOM   3307  C   VAL C  49      15.184  39.370  59.556  1.00 22.93      1tnf C  
ATOM   3308  O   VAL C  49      15.282  38.408  58.778  1.00 21.88      1tnf O  
ATOM   3309  CB  VAL C  49      12.959  39.322  60.917  1.00 25.23      1tnf C  
ATOM   3310  CG1 VAL C  49      13.297  39.882  62.277  1.00 27.17      1tnf C  
ATOM   3311  CG2 VAL C  49      11.480  39.651  60.764  1.00 26.44      1tnf C  
ATOM   3312  HN  VAL C  49      12.757  39.093  58.284  1.00  0.00      1tnf H  
ATOM   3313  N   VAL C  50      16.205  40.044  60.052  1.00 24.46      1tnf N  
ATOM   3314  CA  VAL C  50      17.589  39.726  59.756  1.00 27.29      1tnf C  
ATOM   3315  C   VAL C  50      18.216  38.960  60.891  1.00 27.32      1tnf C  
ATOM   3316  O   VAL C  50      18.133  39.430  62.023  1.00 26.80      1tnf O  
ATOM   3317  CB  VAL C  50      18.294  41.075  59.500  1.00 30.48      1tnf C  
ATOM   3318  CG1 VAL C  50      19.827  41.000  59.715  1.00 30.34      1tnf C  
ATOM   3319  CG2 VAL C  50      17.826  41.523  58.109  1.00 30.36      1tnf C  
ATOM   3320  HN  VAL C  50      16.011  40.828  60.675  1.00  0.00      1tnf H  
ATOM   3321  N   PRO C  51      18.872  37.837  60.677  1.00 29.71      1tnf N  
ATOM   3322  CA  PRO C  51      19.612  37.109  61.703  1.00 31.12      1tnf C  
ATOM   3323  C   PRO C  51      21.013  37.725  61.854  1.00 32.99      1tnf C  
ATOM   3324  O   PRO C  51      21.266  38.921  61.606  1.00 36.45      1tnf O  
ATOM   3325  CB  PRO C  51      19.559  35.699  61.145  1.00 30.15      1tnf C  
ATOM   3326  CG  PRO C  51      19.891  35.933  59.694  1.00 30.13      1tnf C  
ATOM   3327  CD  PRO C  51      19.078  37.219  59.371  1.00 32.68      1tnf C  
ATOM   3328  N   SER C  52      21.944  36.837  62.177  1.00 32.71      1tnf N  
ATOM   3329  CA  SER C  52      23.350  37.105  62.321  1.00 32.49      1tnf C  
ATOM   3330  C   SER C  52      23.809  38.409  62.917  1.00 33.86      1tnf C  
ATOM   3331  O   SER C  52      23.827  38.496  64.134  1.00 37.03      1tnf O  
ATOM   3332  CB  SER C  52      23.979  36.883  60.978  1.00 32.70      1tnf C  
ATOM   3333  OG  SER C  52      23.526  35.599  60.589  1.00 34.43      1tnf O  
ATOM   3334  HN  SER C  52      21.635  35.878  62.338  1.00  0.00      1tnf H  
ATOM   3335  HG  SER C  52      23.924  35.458  59.738  1.00  0.00      1tnf H  
ATOM   3336  N   GLU C  53      24.027  39.430  62.083  1.00 32.90      1tnf N  
ATOM   3337  CA  GLU C  53      24.724  40.705  62.313  1.00 34.39      1tnf C  
ATOM   3338  C   GLU C  53      25.523  40.718  60.974  1.00 34.49      1tnf C  
ATOM   3339  O   GLU C  53      25.614  39.669  60.293  1.00 36.59      1tnf O  
ATOM   3340  CB  GLU C  53      25.749  40.713  63.498  1.00 32.40      1tnf C  
ATOM   3341  CG  GLU C  53      26.220  42.104  63.900  1.00 38.25      1tnf C  
ATOM   3342  CD  GLU C  53      26.906  42.380  65.271  1.00 42.21      1tnf C  
ATOM   3343  OE1 GLU C  53      26.745  41.648  66.262  1.00 43.44      1tnf O  
ATOM   3344  OE2 GLU C  53      27.591  43.400  65.358  1.00 41.22      1tnf O1-
ATOM   3345  HN  GLU C  53      23.653  39.306  61.142  1.00  0.00      1tnf H  
ATOM   3346  N   GLY C  54      26.022  41.857  60.458  1.00 32.05      1tnf N  
ATOM   3347  CA  GLY C  54      26.806  41.814  59.233  1.00 27.63      1tnf C  
ATOM   3348  C   GLY C  54      26.486  42.935  58.281  1.00 24.28      1tnf C  
ATOM   3349  O   GLY C  54      25.640  43.773  58.572  1.00 24.67      1tnf O  
ATOM   3350  HN  GLY C  54      25.851  42.748  60.925  1.00  0.00      1tnf H  
ATOM   3351  N   LEU C  55      27.177  42.974  57.151  1.00 23.12      1tnf N  
ATOM   3352  CA  LEU C  55      26.947  43.930  56.074  1.00 21.02      1tnf C  
ATOM   3353  C   LEU C  55      26.092  43.204  55.039  1.00 23.60      1tnf C  
ATOM   3354  O   LEU C  55      26.544  42.255  54.370  1.00 21.29      1tnf O  
ATOM   3355  CB  LEU C  55      28.205  44.326  55.381  1.00 19.64      1tnf C  
ATOM   3356  CG  LEU C  55      29.188  45.398  55.834  1.00 19.29      1tnf C  
ATOM   3357  CD1 LEU C  55      29.123  45.771  57.288  1.00 15.07      1tnf C  
ATOM   3358  CD2 LEU C  55      30.528  44.840  55.382  1.00 16.95      1tnf C  
ATOM   3359  HN  LEU C  55      27.921  42.288  57.026  1.00  0.00      1tnf H  
ATOM   3360  N   TYR C  56      24.811  43.589  55.007  1.00 21.16      1tnf N  
ATOM   3361  CA  TYR C  56      23.907  43.082  54.022  1.00 22.46      1tnf C  
ATOM   3362  C   TYR C  56      23.810  43.991  52.789  1.00 22.18      1tnf C  
ATOM   3363  O   TYR C  56      23.699  45.224  52.909  1.00 25.90      1tnf O  
ATOM   3364  CB  TYR C  56      22.531  42.916  54.646  1.00 23.24      1tnf C  
ATOM   3365  CG  TYR C  56      22.501  41.717  55.585  1.00 25.62      1tnf C  
ATOM   3366  CD1 TYR C  56      23.010  41.863  56.870  1.00 26.21      1tnf C  
ATOM   3367  CD2 TYR C  56      21.916  40.522  55.204  1.00 24.68      1tnf C  
ATOM   3368  CE1 TYR C  56      22.931  40.849  57.785  1.00 22.73      1tnf C  
ATOM   3369  CE2 TYR C  56      21.840  39.492  56.128  1.00 24.77      1tnf C  
ATOM   3370  CZ  TYR C  56      22.338  39.671  57.414  1.00 23.53      1tnf C  
ATOM   3371  OH  TYR C  56      22.194  38.688  58.379  1.00 23.73      1tnf O  
ATOM   3372  HN  TYR C  56      24.473  44.258  55.699  1.00  0.00      1tnf H  
ATOM   3373  HH  TYR C  56      22.534  38.810  59.258  1.00  0.00      1tnf H  
ATOM   3374  N   LEU C  57      23.918  43.384  51.586  1.00 19.70      1tnf N  
ATOM   3375  CA  LEU C  57      23.612  44.055  50.322  1.00 14.22      1tnf C  
ATOM   3376  C   LEU C  57      22.095  43.912  50.247  1.00 12.82      1tnf C  
ATOM   3377  O   LEU C  57      21.558  42.809  50.424  1.00 10.29      1tnf O  
ATOM   3378  CB  LEU C  57      24.237  43.343  49.159  1.00 11.15      1tnf C  
ATOM   3379  CG  LEU C  57      23.634  43.673  47.784  1.00 11.41      1tnf C  
ATOM   3380  CD1 LEU C  57      24.086  45.047  47.308  1.00 12.35      1tnf C  
ATOM   3381  CD2 LEU C  57      24.033  42.587  46.801  1.00 11.53      1tnf C  
ATOM   3382  HN  LEU C  57      24.227  42.412  51.558  1.00  0.00      1tnf H  
ATOM   3383  N   ILE C  58      21.462  45.051  50.007  1.00  7.79      1tnf N  
ATOM   3384  CA  ILE C  58      20.013  45.230  50.075  1.00  9.55      1tnf C  
ATOM   3385  C   ILE C  58      19.581  45.751  48.703  1.00 10.77      1tnf C  
ATOM   3386  O   ILE C  58      20.201  46.657  48.130  1.00  9.91      1tnf O  
ATOM   3387  CB  ILE C  58      19.613  46.301  51.187  1.00  8.17      1tnf C  
ATOM   3388  CG1 ILE C  58      20.411  46.129  52.466  1.00 13.28      1tnf C  
ATOM   3389  CG2 ILE C  58      18.172  46.148  51.547  1.00  6.85      1tnf C  
ATOM   3390  CD1 ILE C  58      20.134  47.079  53.645  1.00 14.74      1tnf C  
ATOM   3391  HN  ILE C  58      22.027  45.862  49.756  1.00  0.00      1tnf H  
ATOM   3392  N   TYR C  59      18.476  45.284  48.175  1.00  9.92      1tnf N  
ATOM   3393  CA  TYR C  59      18.007  45.760  46.900  1.00  9.72      1tnf C  
ATOM   3394  C   TYR C  59      16.468  45.646  46.833  1.00 11.02      1tnf C  
ATOM   3395  O   TYR C  59      15.930  44.789  47.542  1.00  6.08      1tnf O  
ATOM   3396  CB  TYR C  59      18.687  44.917  45.770  1.00  3.44      1tnf C  
ATOM   3397  CG  TYR C  59      18.383  43.398  45.681  1.00  3.28      1tnf C  
ATOM   3398  CD1 TYR C  59      17.209  42.906  45.161  1.00  5.20      1tnf C  
ATOM   3399  CD2 TYR C  59      19.322  42.498  46.128  1.00  2.37      1tnf C  
ATOM   3400  CE1 TYR C  59      16.987  41.555  45.088  1.00  5.49      1tnf C  
ATOM   3401  CE2 TYR C  59      19.116  41.150  46.070  1.00  2.00      1tnf C  
ATOM   3402  CZ  TYR C  59      17.946  40.675  45.561  1.00  2.60      1tnf C  
ATOM   3403  OH  TYR C  59      17.675  39.315  45.604  1.00  2.00      1tnf O  
ATOM   3404  HN  TYR C  59      17.941  44.574  48.674  1.00  0.00      1tnf H  
ATOM   3405  HH  TYR C  59      16.859  38.984  45.249  1.00  0.00      1tnf H  
ATOM   3406  N   SER C  60      15.778  46.501  46.028  1.00  9.52      1tnf N  
ATOM   3407  CA  SER C  60      14.405  46.256  45.575  1.00  8.04      1tnf C  
ATOM   3408  C   SER C  60      14.002  47.128  44.368  1.00 11.89      1tnf C  
ATOM   3409  O   SER C  60      14.627  48.147  44.030  1.00  9.83      1tnf O  
ATOM   3410  CB  SER C  60      13.362  46.464  46.681  1.00  5.22      1tnf C  
ATOM   3411  OG  SER C  60      13.383  47.759  47.197  1.00  6.92      1tnf O  
ATOM   3412  HN  SER C  60      16.241  47.357  45.724  1.00  0.00      1tnf H  
ATOM   3413  HG  SER C  60      12.737  47.888  47.882  1.00  0.00      1tnf H  
ATOM   3414  N   GLN C  61      12.945  46.677  43.680  1.00 14.47      1tnf N  
ATOM   3415  CA  GLN C  61      12.422  47.341  42.494  1.00 16.33      1tnf C  
ATOM   3416  C   GLN C  61      10.934  47.301  42.590  1.00 16.94      1tnf C  
ATOM   3417  O   GLN C  61      10.361  46.255  42.913  1.00 15.99      1tnf O  
ATOM   3418  CB  GLN C  61      12.758  46.647  41.201  1.00 17.20      1tnf C  
ATOM   3419  CG  GLN C  61      12.257  47.298  39.930  1.00 13.80      1tnf C  
ATOM   3420  CD  GLN C  61      12.231  46.307  38.771  1.00 13.09      1tnf C  
ATOM   3421  NE2 GLN C  61      13.293  46.247  37.991  1.00  7.97      1tnf N  
ATOM   3422  OE1 GLN C  61      11.263  45.581  38.587  1.00 10.56      1tnf O  
ATOM   3423  HN  GLN C  61      12.484  45.826  44.003  1.00  0.00      1tnf H  
ATOM   3424 1HE2 GLN C  61      14.100  46.852  38.144  1.00  0.00      1tnf H  
ATOM   3425 2HE2 GLN C  61      13.276  45.584  37.216  1.00  0.00      1tnf H  
ATOM   3426  N   VAL C  62      10.392  48.460  42.244  1.00 17.36      1tnf N  
ATOM   3427  CA  VAL C  62       8.967  48.664  42.263  1.00 17.94      1tnf C  
ATOM   3428  C   VAL C  62       8.625  49.108  40.845  1.00 20.27      1tnf C  
ATOM   3429  O   VAL C  62       9.388  49.895  40.253  1.00 20.89      1tnf O  
ATOM   3430  CB  VAL C  62       8.546  49.779  43.284  1.00 17.69      1tnf C  
ATOM   3431  CG1 VAL C  62       8.382  49.175  44.653  1.00 16.11      1tnf C  
ATOM   3432  CG2 VAL C  62       9.593  50.898  43.340  1.00 17.78      1tnf C  
ATOM   3433  HN  VAL C  62      11.000  49.227  41.957  1.00  0.00      1tnf H  
ATOM   3434  N   LEU C  63       7.522  48.627  40.263  1.00 18.48      1tnf N  
ATOM   3435  CA  LEU C  63       7.138  49.149  38.961  1.00 16.92      1tnf C  
ATOM   3436  C   LEU C  63       5.828  49.863  39.117  1.00 15.36      1tnf C  
ATOM   3437  O   LEU C  63       4.817  49.252  39.484  1.00 20.42      1tnf O  
ATOM   3438  CB  LEU C  63       6.955  48.047  37.912  1.00 15.95      1tnf C  
ATOM   3439  CG  LEU C  63       6.668  48.568  36.529  1.00 14.60      1tnf C  
ATOM   3440  CD1 LEU C  63       7.845  49.350  35.967  1.00 15.54      1tnf C  
ATOM   3441  CD2 LEU C  63       6.420  47.395  35.643  1.00 17.60      1tnf C  
ATOM   3442  HN  LEU C  63       6.962  47.909  40.722  1.00  0.00      1tnf H  
ATOM   3443  N   PHE C  64       5.878  51.160  38.933  1.00 11.94      1tnf N  
ATOM   3444  CA  PHE C  64       4.655  51.893  38.933  1.00 14.61      1tnf C  
ATOM   3445  C   PHE C  64       4.112  52.001  37.491  1.00 18.63      1tnf C  
ATOM   3446  O   PHE C  64       4.844  52.214  36.509  1.00 15.01      1tnf O  
ATOM   3447  CB  PHE C  64       4.902  53.240  39.489  1.00 18.24      1tnf C  
ATOM   3448  CG  PHE C  64       5.465  53.369  40.897  1.00 19.64      1tnf C  
ATOM   3449  CD1 PHE C  64       6.849  53.549  41.075  1.00 19.52      1tnf C  
ATOM   3450  CD2 PHE C  64       4.589  53.435  41.971  1.00 15.55      1tnf C  
ATOM   3451  CE1 PHE C  64       7.325  53.822  42.339  1.00 16.67      1tnf C  
ATOM   3452  CE2 PHE C  64       5.079  53.706  43.224  1.00 12.80      1tnf C  
ATOM   3453  CZ  PHE C  64       6.435  53.906  43.399  1.00 17.45      1tnf C  
ATOM   3454  HN  PHE C  64       6.771  51.634  38.793  1.00  0.00      1tnf H  
ATOM   3455  N   LYS C  65       2.796  51.866  37.358  1.00 21.25      1tnf N  
ATOM   3456  CA  LYS C  65       2.108  51.828  36.086  1.00 24.56      1tnf C  
ATOM   3457  C   LYS C  65       0.906  52.775  36.087  1.00 25.18      1tnf C  
ATOM   3458  O   LYS C  65      -0.019  52.584  36.874  1.00 23.59      1tnf O  
ATOM   3459  CB  LYS C  65       1.682  50.382  35.856  1.00 26.15      1tnf C  
ATOM   3460  CG  LYS C  65       0.598  50.144  34.778  1.00 31.49      1tnf C  
ATOM   3461  CD  LYS C  65      -0.277  48.904  35.102  1.00 34.53      1tnf C  
ATOM   3462  CE  LYS C  65      -0.781  48.813  36.579  1.00 34.28      1tnf C  
ATOM   3463  NZ  LYS C  65      -1.680  47.686  36.879  1.00 31.71      1tnf N1+
ATOM   3464  HN  LYS C  65       2.236  51.784  38.207  1.00  0.00      1tnf H  
ATOM   3465  HZ1 LYS C  65      -2.009  47.627  37.843  1.00  0.00      1tnf H  
ATOM   3466  HZ2 LYS C  65      -1.239  46.807  36.607  1.00  0.00      1tnf H  
ATOM   3467  HZ3 LYS C  65      -2.475  47.696  36.240  1.00  0.00      1tnf H  
ATOM   3468  N   GLY C  66       0.802  53.775  35.231  1.00 28.47      1tnf N  
ATOM   3469  CA  GLY C  66      -0.356  54.654  35.276  1.00 30.97      1tnf C  
ATOM   3470  C   GLY C  66      -0.870  54.977  33.891  1.00 32.23      1tnf C  
ATOM   3471  O   GLY C  66      -0.108  55.308  32.991  1.00 33.47      1tnf O  
ATOM   3472  HN  GLY C  66       1.534  53.931  34.538  1.00  0.00      1tnf H  
ATOM   3473  N   GLN C  67      -2.155  54.848  33.654  1.00 34.34      1tnf N  
ATOM   3474  CA  GLN C  67      -2.757  55.185  32.376  1.00 38.33      1tnf C  
ATOM   3475  C   GLN C  67      -3.237  56.629  32.449  1.00 38.87      1tnf C  
ATOM   3476  O   GLN C  67      -4.334  56.968  32.905  1.00 37.97      1tnf O  
ATOM   3477  CB  GLN C  67      -3.955  54.260  32.010  1.00 40.15      1tnf C  
ATOM   3478  CG  GLN C  67      -4.718  53.468  33.089  1.00 44.61      1tnf C  
ATOM   3479  CD  GLN C  67      -3.881  52.427  33.836  1.00 46.49      1tnf C  
ATOM   3480  NE2 GLN C  67      -3.761  51.162  33.420  1.00 45.91      1tnf N  
ATOM   3481  OE1 GLN C  67      -3.270  52.768  34.855  1.00 48.91      1tnf O  
ATOM   3482  HN  GLN C  67      -2.756  54.496  34.399  1.00  0.00      1tnf H  
ATOM   3483 1HE2 GLN C  67      -4.265  50.881  32.579  1.00  0.00      1tnf H  
ATOM   3484 2HE2 GLN C  67      -3.203  50.468  33.918  1.00  0.00      1tnf H  
ATOM   3485  N   GLY C  68      -2.349  57.513  32.001  1.00 38.75      1tnf N  
ATOM   3486  CA  GLY C  68      -2.689  58.919  31.978  1.00 36.14      1tnf C  
ATOM   3487  C   GLY C  68      -2.079  59.547  33.194  1.00 35.85      1tnf C  
ATOM   3488  O   GLY C  68      -1.312  58.913  33.917  1.00 37.91      1tnf O  
ATOM   3489  HN  GLY C  68      -1.434  57.201  31.676  1.00  0.00      1tnf H  
ATOM   3490  N   CYS C  69      -2.472  60.782  33.452  1.00 37.30      1tnf N  
ATOM   3491  CA  CYS C  69      -1.960  61.558  34.565  1.00 35.78      1tnf C  
ATOM   3492  C   CYS C  69      -3.062  62.460  35.032  1.00 39.66      1tnf C  
ATOM   3493  O   CYS C  69      -3.515  63.263  34.192  1.00 37.42      1tnf O  
ATOM   3494  CB  CYS C  69      -0.818  62.438  34.158  1.00 32.48      1tnf C  
ATOM   3495  SG  CYS C  69       0.602  61.417  33.746  1.00 28.45      1tnf S  
ATOM   3496  HN  CYS C  69      -3.167  61.209  32.840  1.00  0.00      1tnf H  
ATOM   3497  N   PRO C  70      -3.524  62.351  36.319  1.00 43.22      1tnf N  
ATOM   3498  CA  PRO C  70      -4.522  63.243  36.922  1.00 40.67      1tnf C  
ATOM   3499  C   PRO C  70      -3.874  64.600  37.080  1.00 39.36      1tnf C  
ATOM   3500  O   PRO C  70      -2.657  64.741  36.923  1.00 37.14      1tnf O  
ATOM   3501  CB  PRO C  70      -4.895  62.615  38.250  1.00 41.09      1tnf C  
ATOM   3502  CG  PRO C  70      -4.353  61.197  38.161  1.00 42.97      1tnf C  
ATOM   3503  CD  PRO C  70      -3.058  61.409  37.354  1.00 43.58      1tnf C  
ATOM   3504  N   SER C  71      -4.748  65.601  37.260  1.00 41.21      1tnf N  
ATOM   3505  CA  SER C  71      -4.346  66.959  37.603  1.00 41.01      1tnf C  
ATOM   3506  C   SER C  71      -3.579  66.804  38.915  1.00 40.67      1tnf C  
ATOM   3507  O   SER C  71      -3.936  65.951  39.728  1.00 44.21      1tnf O  
ATOM   3508  CB  SER C  71      -5.582  67.812  37.815  1.00 41.57      1tnf C  
ATOM   3509  OG  SER C  71      -5.272  69.054  38.447  1.00 40.56      1tnf O  
ATOM   3510  HN  SER C  71      -5.743  65.402  37.152  1.00  0.00      1tnf H  
ATOM   3511  HG  SER C  71      -6.046  69.588  38.580  1.00  0.00      1tnf H  
ATOM   3512  N   THR C  72      -2.625  67.674  39.160  1.00 38.92      1tnf N  
ATOM   3513  CA  THR C  72      -1.729  67.609  40.295  1.00 38.54      1tnf C  
ATOM   3514  C   THR C  72      -0.699  66.496  40.180  1.00 41.12      1tnf C  
ATOM   3515  O   THR C  72      -0.807  65.483  39.476  1.00 40.55      1tnf O  
ATOM   3516  CB  THR C  72      -2.504  67.479  41.643  1.00 34.20      1tnf C  
ATOM   3517  CG2 THR C  72      -2.309  66.226  42.502  1.00 31.35      1tnf C  
ATOM   3518  OG1 THR C  72      -2.060  68.694  42.255  1.00 33.44      1tnf O  
ATOM   3519  HN  THR C  72      -2.508  68.448  38.506  1.00  0.00      1tnf H  
ATOM   3520  HG1 THR C  72      -2.532  68.615  43.076  1.00  0.00      1tnf H  
ATOM   3521  N   HIS C  73       0.419  66.871  40.832  1.00 41.96      1tnf N  
ATOM   3522  CA  HIS C  73       1.576  66.018  40.799  1.00 42.78      1tnf C  
ATOM   3523  C   HIS C  73       1.269  64.644  41.350  1.00 42.77      1tnf C  
ATOM   3524  O   HIS C  73       0.576  64.481  42.352  1.00 42.90      1tnf O  
ATOM   3525  CB  HIS C  73       2.732  66.544  41.609  1.00 43.71      1tnf C  
ATOM   3526  CG  HIS C  73       3.982  66.586  40.742  1.00 44.30      1tnf C  
ATOM   3527  CD2 HIS C  73       5.183  67.027  41.220  1.00 45.31      1tnf C  
ATOM   3528  ND1 HIS C  73       4.139  66.302  39.442  1.00 44.22      1tnf N  
ATOM   3529  CE1 HIS C  73       5.377  66.559  39.136  1.00 44.79      1tnf C  
ATOM   3530  NE2 HIS C  73       5.990  66.993  40.199  1.00 45.19      1tnf N  
ATOM   3531  HN  HIS C  73       0.444  67.752  41.345  1.00  0.00      1tnf H  
ATOM   3532  HD1 HIS C  73       3.421  65.950  38.809  1.00  0.00      1tnf H  
ATOM   3533  HE2 HIS C  73       6.971  67.269  40.228  1.00  0.00      1tnf H  
ATOM   3534  N   VAL C  74       1.717  63.745  40.470  1.00 41.74      1tnf N  
ATOM   3535  CA  VAL C  74       1.659  62.335  40.720  1.00 39.97      1tnf C  
ATOM   3536  C   VAL C  74       2.760  61.906  41.661  1.00 35.51      1tnf C  
ATOM   3537  O   VAL C  74       2.457  61.075  42.503  1.00 39.88      1tnf O  
ATOM   3538  CB  VAL C  74       1.721  61.599  39.362  1.00 41.30      1tnf C  
ATOM   3539  CG1 VAL C  74       3.022  61.952  38.636  1.00 43.50      1tnf C  
ATOM   3540  CG2 VAL C  74       1.514  60.098  39.607  1.00 41.35      1tnf C  
ATOM   3541  HN  VAL C  74       2.114  64.073  39.590  1.00  0.00      1tnf H  
ATOM   3542  N   LEU C  75       3.982  62.409  41.517  1.00 30.10      1tnf N  
ATOM   3543  CA  LEU C  75       5.056  62.148  42.474  1.00 29.55      1tnf C  
ATOM   3544  C   LEU C  75       5.139  60.774  43.197  1.00 25.40      1tnf C  
ATOM   3545  O   LEU C  75       4.467  60.575  44.203  1.00 23.68      1tnf O  
ATOM   3546  CB  LEU C  75       4.963  63.326  43.461  1.00 30.60      1tnf C  
ATOM   3547  CG  LEU C  75       6.014  63.558  44.549  1.00 31.41      1tnf C  
ATOM   3548  CD1 LEU C  75       7.372  63.621  43.905  1.00 32.69      1tnf C  
ATOM   3549  CD2 LEU C  75       5.716  64.835  45.304  1.00 30.96      1tnf C  
ATOM   3550  HN  LEU C  75       4.178  62.999  40.708  1.00  0.00      1tnf H  
ATOM   3551  N   LEU C  76       5.910  59.785  42.756  1.00 23.37      1tnf N  
ATOM   3552  CA  LEU C  76       5.940  58.475  43.393  1.00 24.09      1tnf C  
ATOM   3553  C   LEU C  76       7.177  58.344  44.253  1.00 24.25      1tnf C  
ATOM   3554  O   LEU C  76       8.093  59.175  44.077  1.00 25.24      1tnf O  
ATOM   3555  CB  LEU C  76       5.968  57.365  42.365  1.00 26.87      1tnf C  
ATOM   3556  CG  LEU C  76       4.813  56.929  41.467  1.00 26.50      1tnf C  
ATOM   3557  CD1 LEU C  76       3.591  57.809  41.528  1.00 26.36      1tnf C  
ATOM   3558  CD2 LEU C  76       5.433  56.886  40.086  1.00 27.75      1tnf C  
ATOM   3559  HN  LEU C  76       6.502  59.949  41.942  1.00  0.00      1tnf H  
ATOM   3560  N   THR C  77       7.228  57.321  45.137  1.00 22.20      1tnf N  
ATOM   3561  CA  THR C  77       8.282  57.189  46.151  1.00 24.29      1tnf C  
ATOM   3562  C   THR C  77       8.431  55.741  46.607  1.00 22.82      1tnf C  
ATOM   3563  O   THR C  77       7.452  54.983  46.691  1.00 25.88      1tnf O  
ATOM   3564  CB  THR C  77       7.962  58.151  47.424  1.00 22.55      1tnf C  
ATOM   3565  CG2 THR C  77       8.786  57.850  48.662  1.00 21.11      1tnf C  
ATOM   3566  OG1 THR C  77       8.283  59.507  47.075  1.00 22.13      1tnf O  
ATOM   3567  HN  THR C  77       6.500  56.608  45.097  1.00  0.00      1tnf H  
ATOM   3568  HG1 THR C  77       8.096  60.069  47.818  1.00  0.00      1tnf H  
ATOM   3569  N   HIS C  78       9.669  55.342  46.898  1.00 19.33      1tnf N  
ATOM   3570  CA  HIS C  78       9.916  53.991  47.345  1.00 16.77      1tnf C  
ATOM   3571  C   HIS C  78      11.013  53.986  48.397  1.00 15.66      1tnf C  
ATOM   3572  O   HIS C  78      12.146  54.334  48.066  1.00 16.79      1tnf O  
ATOM   3573  CB  HIS C  78      10.322  53.184  46.159  1.00 13.64      1tnf C  
ATOM   3574  CG  HIS C  78      10.703  51.762  46.477  1.00 14.74      1tnf C  
ATOM   3575  CD2 HIS C  78       9.961  50.826  47.159  1.00 17.69      1tnf C  
ATOM   3576  ND1 HIS C  78      11.801  51.183  46.054  1.00 19.10      1tnf N  
ATOM   3577  CE1 HIS C  78      11.730  49.927  46.444  1.00 20.93      1tnf C  
ATOM   3578  NE2 HIS C  78      10.625  49.710  47.105  1.00 17.48      1tnf N  
ATOM   3579  HN  HIS C  78      10.447  55.995  46.804  1.00  0.00      1tnf H  
ATOM   3580  HD1 HIS C  78      12.559  51.618  45.528  1.00  0.00      1tnf H  
ATOM   3581  HE2 HIS C  78      10.334  48.820  47.509  1.00  0.00      1tnf H  
ATOM   3582  N   THR C  79      10.748  53.564  49.621  1.00 13.99      1tnf N  
ATOM   3583  CA  THR C  79      11.783  53.576  50.628  1.00 15.08      1tnf C  
ATOM   3584  C   THR C  79      12.088  52.188  51.230  1.00 14.23      1tnf C  
ATOM   3585  O   THR C  79      11.290  51.219  51.185  1.00 15.88      1tnf O  
ATOM   3586  CB  THR C  79      11.321  54.670  51.711  1.00 16.87      1tnf C  
ATOM   3587  CG2 THR C  79      12.412  55.099  52.708  1.00 14.61      1tnf C  
ATOM   3588  OG1 THR C  79      10.928  55.821  50.975  1.00 12.55      1tnf O  
ATOM   3589  HN  THR C  79       9.813  53.230  49.854  1.00  0.00      1tnf H  
ATOM   3590  HG1 THR C  79      10.255  55.556  50.360  1.00  0.00      1tnf H  
ATOM   3591  N   ILE C  80      13.338  52.087  51.662  1.00  9.33      1tnf N  
ATOM   3592  CA  ILE C  80      13.759  50.947  52.441  1.00 12.40      1tnf C  
ATOM   3593  C   ILE C  80      14.350  51.564  53.702  1.00 10.99      1tnf C  
ATOM   3594  O   ILE C  80      15.262  52.415  53.701  1.00 10.67      1tnf O  
ATOM   3595  CB  ILE C  80      14.823  50.078  51.718  1.00 14.80      1tnf C  
ATOM   3596  CG1 ILE C  80      14.192  49.403  50.541  1.00 14.53      1tnf C  
ATOM   3597  CG2 ILE C  80      15.387  48.992  52.670  1.00 18.25      1tnf C  
ATOM   3598  CD1 ILE C  80      15.293  48.769  49.657  1.00 21.64      1tnf C  
ATOM   3599  HN  ILE C  80      14.009  52.823  51.441  1.00  0.00      1tnf H  
ATOM   3600  N   SER C  81      13.697  51.180  54.789  1.00 15.14      1tnf N  
ATOM   3601  CA  SER C  81      14.076  51.622  56.127  1.00 17.36      1tnf C  
ATOM   3602  C   SER C  81      14.430  50.430  57.017  1.00 16.66      1tnf C  
ATOM   3603  O   SER C  81      13.944  49.291  56.871  1.00 15.96      1tnf O  
ATOM   3604  CB  SER C  81      12.911  52.464  56.696  1.00 16.35      1tnf C  
ATOM   3605  OG  SER C  81      11.627  51.989  56.289  1.00 23.60      1tnf O  
ATOM   3606  HN  SER C  81      12.900  50.552  54.687  1.00  0.00      1tnf H  
ATOM   3607  HG  SER C  81      10.911  52.506  56.639  1.00  0.00      1tnf H  
ATOM   3608  N   ARG C  82      15.379  50.672  57.906  1.00 16.65      1tnf N  
ATOM   3609  CA  ARG C  82      15.807  49.624  58.827  1.00 17.43      1tnf C  
ATOM   3610  C   ARG C  82      15.148  49.846  60.187  1.00 16.58      1tnf C  
ATOM   3611  O   ARG C  82      15.367  50.962  60.700  1.00 19.11      1tnf O  
ATOM   3612  CB  ARG C  82      17.340  49.691  58.903  1.00 18.16      1tnf C  
ATOM   3613  CG  ARG C  82      18.037  48.965  59.994  1.00 20.27      1tnf C  
ATOM   3614  CD  ARG C  82      18.413  49.983  61.047  1.00 23.74      1tnf C  
ATOM   3615  NE  ARG C  82      19.851  50.170  61.082  1.00 31.04      1tnf N  
ATOM   3616  CZ  ARG C  82      20.690  49.246  61.615  1.00 32.95      1tnf C  
ATOM   3617  NH1 ARG C  82      22.014  49.449  61.536  1.00 35.02      1tnf N1+
ATOM   3618  NH2 ARG C  82      20.265  48.138  62.240  1.00 29.63      1tnf N  
ATOM   3619  HN  ARG C  82      15.813  51.594  57.948  1.00  0.00      1tnf H  
ATOM   3620  HE  ARG C  82      20.245  51.026  60.692  1.00  0.00      1tnf H  
ATOM   3621 1HH1 ARG C  82      22.645  48.755  61.937  1.00  0.00      1tnf H  
ATOM   3622 2HH1 ARG C  82      22.337  50.292  61.061  1.00  0.00      1tnf H  
ATOM   3623 1HH2 ARG C  82      20.896  47.444  62.641  1.00  0.00      1tnf H  
ATOM   3624 2HH2 ARG C  82      19.259  47.984  62.300  1.00  0.00      1tnf H  
ATOM   3625  N   ILE C  83      14.307  49.011  60.806  1.00 13.06      1tnf N  
ATOM   3626  CA  ILE C  83      14.008  49.390  62.173  1.00 16.16      1tnf C  
ATOM   3627  C   ILE C  83      14.953  48.628  63.057  1.00 15.36      1tnf C  
ATOM   3628  O   ILE C  83      15.105  47.404  63.084  1.00 12.49      1tnf O  
ATOM   3629  CB  ILE C  83      12.513  49.178  62.657  1.00 18.38      1tnf C  
ATOM   3630  CG1 ILE C  83      11.701  47.974  62.240  1.00 19.44      1tnf C  
ATOM   3631  CG2 ILE C  83      11.893  50.423  62.076  1.00 21.17      1tnf C  
ATOM   3632  CD1 ILE C  83      10.179  48.255  61.934  1.00 21.53      1tnf C  
ATOM   3633  HN  ILE C  83      13.912  48.184  60.358  1.00  0.00      1tnf H  
ATOM   3634  N   ALA C  84      15.768  49.514  63.586  1.00 17.86      1tnf N  
ATOM   3635  CA  ALA C  84      16.782  49.133  64.534  1.00 22.00      1tnf C  
ATOM   3636  C   ALA C  84      16.120  48.656  65.842  1.00 26.57      1tnf C  
ATOM   3637  O   ALA C  84      15.070  49.214  66.193  1.00 26.34      1tnf O  
ATOM   3638  CB  ALA C  84      17.673  50.308  64.828  1.00 22.68      1tnf C  
ATOM   3639  HN  ALA C  84      15.680  50.494  63.318  1.00  0.00      1tnf H  
ATOM   3640  N   VAL C  85      16.673  47.603  66.495  1.00 26.17      1tnf N  
ATOM   3641  CA  VAL C  85      16.134  47.060  67.730  1.00 26.53      1tnf C  
ATOM   3642  C   VAL C  85      16.900  47.605  68.946  1.00 29.44      1tnf C  
ATOM   3643  O   VAL C  85      16.518  47.358  70.077  1.00 30.09      1tnf O  
ATOM   3644  CB  VAL C  85      16.189  45.519  67.607  1.00 25.34      1tnf C  
ATOM   3645  CG1 VAL C  85      17.612  44.955  67.666  1.00 25.22      1tnf C  
ATOM   3646  CG2 VAL C  85      15.331  44.972  68.717  1.00 26.05      1tnf C  
ATOM   3647  HN  VAL C  85      17.508  47.171  66.099  1.00  0.00      1tnf H  
ATOM   3648  N   SER C  86      17.949  48.416  68.793  1.00 34.87      1tnf N  
ATOM   3649  CA  SER C  86      18.684  49.001  69.908  1.00 38.74      1tnf C  
ATOM   3650  C   SER C  86      17.996  50.351  70.099  1.00 41.91      1tnf C  
ATOM   3651  O   SER C  86      16.886  50.466  70.627  1.00 44.08      1tnf O  
ATOM   3652  CB  SER C  86      20.167  49.134  69.485  1.00 38.02      1tnf C  
ATOM   3653  OG  SER C  86      20.349  49.840  68.230  1.00 38.28      1tnf O  
ATOM   3654  HN  SER C  86      18.253  48.638  67.845  1.00  0.00      1tnf H  
ATOM   3655  HG  SER C  86      21.259  49.922  67.970  1.00  0.00      1tnf H  
ATOM   3656  N   TYR C  87      18.607  51.423  69.583  1.00 46.36      1tnf N  
ATOM   3657  CA  TYR C  87      17.997  52.729  69.575  1.00 49.19      1tnf C  
ATOM   3658  C   TYR C  87      17.144  52.387  68.377  1.00 51.11      1tnf C  
ATOM   3659  O   TYR C  87      17.624  52.045  67.288  1.00 52.70      1tnf O  
ATOM   3660  CB  TYR C  87      19.034  53.854  69.289  1.00 51.03      1tnf C  
ATOM   3661  CG  TYR C  87      20.246  53.725  68.342  1.00 54.15      1tnf C  
ATOM   3662  CD1 TYR C  87      20.147  53.592  66.944  1.00 54.36      1tnf C  
ATOM   3663  CD2 TYR C  87      21.507  53.843  68.927  1.00 55.36      1tnf C  
ATOM   3664  CE1 TYR C  87      21.291  53.594  66.144  1.00 55.36      1tnf C  
ATOM   3665  CE2 TYR C  87      22.652  53.850  68.133  1.00 56.10      1tnf C  
ATOM   3666  CZ  TYR C  87      22.550  53.728  66.750  1.00 56.48      1tnf C  
ATOM   3667  OH  TYR C  87      23.734  53.747  66.013  1.00 56.16      1tnf O  
ATOM   3668  HN  TYR C  87      19.538  51.312  69.181  1.00  0.00      1tnf H  
ATOM   3669  HH  TYR C  87      23.664  53.664  65.069  1.00  0.00      1tnf H  
ATOM   3670  N   GLN C  88      15.896  52.157  68.769  1.00 50.00      1tnf N  
ATOM   3671  CA  GLN C  88      14.944  51.711  67.770  1.00 47.70      1tnf C  
ATOM   3672  C   GLN C  88      14.562  52.778  66.744  1.00 42.26      1tnf C  
ATOM   3673  O   GLN C  88      15.272  53.774  66.539  1.00 39.33      1tnf O  
ATOM   3674  CB  GLN C  88      13.737  51.114  68.543  1.00 47.28      1tnf C  
ATOM   3675  CG  GLN C  88      14.366  49.803  68.969  1.00 49.38      1tnf C  
ATOM   3676  CD  GLN C  88      13.883  49.022  70.173  1.00 52.51      1tnf C  
ATOM   3677  NE2 GLN C  88      14.119  49.553  71.356  1.00 53.73      1tnf N  
ATOM   3678  OE1 GLN C  88      13.357  47.906  70.090  1.00 53.66      1tnf O  
ATOM   3679  HN  GLN C  88      15.616  52.290  69.741  1.00  0.00      1tnf H  
ATOM   3680 1HE2 GLN C  88      14.553  50.474  71.424  1.00  0.00      1tnf H  
ATOM   3681 2HE2 GLN C  88      13.794  49.027  72.167  1.00  0.00      1tnf H  
ATOM   3682  N   THR C  89      13.492  52.418  66.058  1.00 35.79      1tnf N  
ATOM   3683  CA  THR C  89      12.806  53.215  65.076  1.00 33.44      1tnf C  
ATOM   3684  C   THR C  89      13.476  53.075  63.726  1.00 31.81      1tnf C  
ATOM   3685  O   THR C  89      14.490  52.392  63.558  1.00 30.08      1tnf O  
ATOM   3686  CB  THR C  89      12.698  54.750  65.476  1.00 32.38      1tnf C  
ATOM   3687  CG2 THR C  89      13.716  55.759  64.898  1.00 28.80      1tnf C  
ATOM   3688  OG1 THR C  89      11.364  55.030  65.025  1.00 26.88      1tnf O  
ATOM   3689  HN  THR C  89      13.117  51.487  66.242  1.00  0.00      1tnf H  
ATOM   3690  HG1 THR C  89      10.738  54.410  65.380  1.00  0.00      1tnf H  
ATOM   3691  N   LYS C  90      12.654  53.552  62.773  1.00 27.16      1tnf N  
ATOM   3692  CA  LYS C  90      12.994  53.507  61.395  1.00 23.74      1tnf C  
ATOM   3693  C   LYS C  90      14.080  54.516  61.235  1.00 19.67      1tnf C  
ATOM   3694  O   LYS C  90      13.982  55.669  61.640  1.00 17.55      1tnf O  
ATOM   3695  CB  LYS C  90      11.839  53.891  60.485  1.00 26.58      1tnf C  
ATOM   3696  CG  LYS C  90      10.573  53.072  60.601  1.00 31.59      1tnf C  
ATOM   3697  CD  LYS C  90       9.511  53.326  59.518  1.00 36.32      1tnf C  
ATOM   3698  CE  LYS C  90       8.240  52.531  59.872  1.00 40.31      1tnf C  
ATOM   3699  NZ  LYS C  90       7.974  51.469  58.905  1.00 43.84      1tnf N1+
ATOM   3700  HN  LYS C  90      11.760  53.958  63.049  1.00  0.00      1tnf H  
ATOM   3701  HZ1 LYS C  90       7.132  50.943  59.139  1.00  0.00      1tnf H  
ATOM   3702  HZ2 LYS C  90       8.780  50.852  58.801  1.00  0.00      1tnf H  
ATOM   3703  HZ3 LYS C  90       7.929  51.836  57.954  1.00  0.00      1tnf H  
ATOM   3704  N   VAL C  91      15.163  53.954  60.779  1.00 19.16      1tnf N  
ATOM   3705  CA  VAL C  91      16.231  54.769  60.314  1.00 22.26      1tnf C  
ATOM   3706  C   VAL C  91      16.152  54.643  58.784  1.00 22.15      1tnf C  
ATOM   3707  O   VAL C  91      15.888  53.596  58.158  1.00 25.19      1tnf O  
ATOM   3708  CB  VAL C  91      17.536  54.249  60.911  1.00 23.43      1tnf C  
ATOM   3709  CG1 VAL C  91      18.449  53.428  60.001  1.00 24.39      1tnf C  
ATOM   3710  CG2 VAL C  91      18.223  55.526  61.255  1.00 27.70      1tnf C  
ATOM   3711  HN  VAL C  91      15.244  52.937  60.756  1.00  0.00      1tnf H  
ATOM   3712  N   ASN C  92      16.345  55.759  58.137  1.00 20.67      1tnf N  
ATOM   3713  CA  ASN C  92      16.140  55.751  56.717  1.00 23.24      1tnf C  
ATOM   3714  C   ASN C  92      17.371  55.300  55.995  1.00 22.33      1tnf C  
ATOM   3715  O   ASN C  92      18.454  55.821  56.294  1.00 26.20      1tnf O  
ATOM   3716  CB  ASN C  92      15.772  57.121  56.237  1.00 24.21      1tnf C  
ATOM   3717  CG  ASN C  92      14.822  56.926  55.088  1.00 25.39      1tnf C  
ATOM   3718  ND2 ASN C  92      15.417  57.022  53.906  1.00 23.39      1tnf N  
ATOM   3719  OD1 ASN C  92      13.620  56.658  55.280  1.00 23.84      1tnf O  
ATOM   3720  HN  ASN C  92      16.632  56.608  58.624  1.00  0.00      1tnf H  
ATOM   3721 1HD2 ASN C  92      16.401  57.241  53.749  1.00  0.00      1tnf H  
ATOM   3722 2HD2 ASN C  92      14.773  56.890  53.127  1.00  0.00      1tnf H  
ATOM   3723  N   LEU C  93      17.255  54.372  55.072  1.00 18.99      1tnf N  
ATOM   3724  CA  LEU C  93      18.480  53.942  54.452  1.00 20.70      1tnf C  
ATOM   3725  C   LEU C  93      18.472  54.358  53.006  1.00 20.04      1tnf C  
ATOM   3726  O   LEU C  93      19.353  55.031  52.504  1.00 18.08      1tnf O  
ATOM   3727  CB  LEU C  93      18.621  52.417  54.582  1.00 22.41      1tnf C  
ATOM   3728  CG  LEU C  93      18.690  51.772  55.994  1.00 21.67      1tnf C  
ATOM   3729  CD1 LEU C  93      18.695  50.251  55.917  1.00 20.87      1tnf C  
ATOM   3730  CD2 LEU C  93      19.993  52.169  56.654  1.00 23.88      1tnf C  
ATOM   3731  HN  LEU C  93      16.350  53.980  54.811  1.00  0.00      1tnf H  
ATOM   3732  N   LEU C  94      17.410  54.008  52.315  1.00 22.49      1tnf N  
ATOM   3733  CA  LEU C  94      17.316  54.220  50.881  1.00 20.84      1tnf C  
ATOM   3734  C   LEU C  94      15.914  54.714  50.523  1.00 18.63      1tnf C  
ATOM   3735  O   LEU C  94      14.930  54.448  51.222  1.00 19.81      1tnf O  
ATOM   3736  CB  LEU C  94      17.603  52.866  50.159  1.00 20.67      1tnf C  
ATOM   3737  CG  LEU C  94      18.855  51.981  50.343  1.00 17.59      1tnf C  
ATOM   3738  CD1 LEU C  94      18.372  50.547  50.511  1.00 17.82      1tnf C  
ATOM   3739  CD2 LEU C  94      19.777  52.012  49.153  1.00 19.80      1tnf C  
ATOM   3740  HN  LEU C  94      16.626  53.573  52.802  1.00  0.00      1tnf H  
ATOM   3741  N   SER C  95      15.804  55.463  49.463  1.00 17.00      1tnf N  
ATOM   3742  CA  SER C  95      14.531  55.807  48.891  1.00 19.59      1tnf C  
ATOM   3743  C   SER C  95      14.835  56.604  47.656  1.00 16.60      1tnf C  
ATOM   3744  O   SER C  95      15.915  57.184  47.566  1.00 19.41      1tnf O  
ATOM   3745  CB  SER C  95      13.629  56.685  49.801  1.00 23.13      1tnf C  
ATOM   3746  OG  SER C  95      14.206  57.746  50.557  1.00 28.15      1tnf O  
ATOM   3747  HN  SER C  95      16.653  55.819  49.023  1.00  0.00      1tnf H  
ATOM   3748  HG  SER C  95      13.654  58.283  51.114  1.00  0.00      1tnf H  
ATOM   3749  N   ALA C  96      13.932  56.652  46.697  1.00 11.59      1tnf N  
ATOM   3750  CA  ALA C  96      14.133  57.505  45.563  1.00  9.40      1tnf C  
ATOM   3751  C   ALA C  96      12.734  58.024  45.223  1.00 11.02      1tnf C  
ATOM   3752  O   ALA C  96      11.667  57.423  45.515  1.00  9.61      1tnf O  
ATOM   3753  CB  ALA C  96      14.767  56.659  44.441  1.00 10.46      1tnf C  
ATOM   3754  HN  ALA C  96      13.089  56.081  46.762  1.00  0.00      1tnf H  
ATOM   3755  N   ILE C  97      12.812  59.232  44.665  1.00 12.27      1tnf N  
ATOM   3756  CA  ILE C  97      11.638  59.997  44.264  1.00 14.04      1tnf C  
ATOM   3757  C   ILE C  97      11.571  60.040  42.742  1.00 13.79      1tnf C  
ATOM   3758  O   ILE C  97      12.613  60.101  42.074  1.00 12.16      1tnf O  
ATOM   3759  CB  ILE C  97      11.732  61.408  44.777  1.00 15.32      1tnf C  
ATOM   3760  CG1 ILE C  97      12.484  61.524  46.084  1.00 18.93      1tnf C  
ATOM   3761  CG2 ILE C  97      10.311  61.875  44.970  1.00 16.14      1tnf C  
ATOM   3762  CD1 ILE C  97      12.775  63.019  46.398  1.00 24.53      1tnf C  
ATOM   3763  HN  ILE C  97      13.735  59.639  44.512  1.00  0.00      1tnf H  
ATOM   3764  N   LYS C  98      10.364  60.022  42.180  1.00 16.76      1tnf N  
ATOM   3765  CA  LYS C  98      10.166  60.011  40.729  1.00 21.32      1tnf C  
ATOM   3766  C   LYS C  98       8.892  60.745  40.363  1.00 24.49      1tnf C  
ATOM   3767  O   LYS C  98       7.826  60.438  40.945  1.00 24.66      1tnf O  
ATOM   3768  CB  LYS C  98      10.043  58.576  40.161  1.00 19.05      1tnf C  
ATOM   3769  CG  LYS C  98      11.187  58.357  39.208  1.00 20.11      1tnf C  
ATOM   3770  CD  LYS C  98      11.403  56.964  38.712  1.00 19.85      1tnf C  
ATOM   3771  CE  LYS C  98      12.594  57.013  37.747  1.00 19.27      1tnf C  
ATOM   3772  NZ  LYS C  98      12.874  55.735  37.100  1.00 19.30      1tnf N1+
ATOM   3773  HN  LYS C  98       9.543  60.016  42.785  1.00  0.00      1tnf H  
ATOM   3774  HZ1 LYS C  98      13.666  55.768  36.458  1.00  0.00      1tnf H  
ATOM   3775  HZ2 LYS C  98      12.042  55.380  36.629  1.00  0.00      1tnf H  
ATOM   3776  HZ3 LYS C  98      13.003  55.000  37.795  1.00  0.00      1tnf H  
ATOM   3777  N   SER C  99       8.976  61.713  39.425  1.00 24.91      1tnf N  
ATOM   3778  CA  SER C  99       7.762  62.397  38.970  1.00 26.71      1tnf C  
ATOM   3779  C   SER C  99       7.354  62.006  37.546  1.00 26.27      1tnf C  
ATOM   3780  O   SER C  99       7.924  62.580  36.628  1.00 27.93      1tnf O  
ATOM   3781  CB  SER C  99       7.968  63.933  39.086  1.00 27.10      1tnf C  
ATOM   3782  OG  SER C  99       7.396  64.450  40.297  1.00 29.76      1tnf O  
ATOM   3783  HN  SER C  99       9.883  61.968  39.034  1.00  0.00      1tnf H  
ATOM   3784  HG  SER C  99       7.522  65.389  40.368  1.00  0.00      1tnf H  
ATOM   3785  N   PRO C 100       6.437  61.085  37.244  1.00 24.43      1tnf N  
ATOM   3786  CA  PRO C 100       6.231  60.629  35.894  1.00 28.86      1tnf C  
ATOM   3787  C   PRO C 100       5.427  61.543  34.971  1.00 29.54      1tnf C  
ATOM   3788  O   PRO C 100       5.391  61.249  33.765  1.00 32.16      1tnf O  
ATOM   3789  CB  PRO C 100       5.640  59.212  36.052  1.00 28.13      1tnf C  
ATOM   3790  CG  PRO C 100       4.880  59.301  37.309  1.00 28.21      1tnf C  
ATOM   3791  CD  PRO C 100       5.936  60.064  38.124  1.00 29.10      1tnf C  
ATOM   3792  N   CYS C 101       4.845  62.659  35.471  1.00 31.60      1tnf N  
ATOM   3793  CA  CYS C 101       4.145  63.585  34.577  1.00 31.74      1tnf C  
ATOM   3794  C   CYS C 101       4.401  65.074  34.802  1.00 34.07      1tnf C  
ATOM   3795  O   CYS C 101       4.252  65.626  35.907  1.00 32.29      1tnf O  
ATOM   3796  CB  CYS C 101       2.651  63.469  34.642  1.00 28.47      1tnf C  
ATOM   3797  SG  CYS C 101       1.990  61.867  35.140  1.00 29.04      1tnf S  
ATOM   3798  HN  CYS C 101       4.894  62.855  36.471  1.00  0.00      1tnf H  
ATOM   3799  N   GLN C 102       4.906  65.650  33.695  1.00 38.24      1tnf N  
ATOM   3800  CA  GLN C 102       5.016  67.090  33.477  1.00 41.39      1tnf C  
ATOM   3801  C   GLN C 102       3.615  67.492  33.012  1.00 44.05      1tnf C  
ATOM   3802  O   GLN C 102       3.021  66.597  32.372  1.00 47.51      1tnf O  
ATOM   3803  CB  GLN C 102       6.016  67.372  32.389  1.00 41.29      1tnf C  
ATOM   3804  CG  GLN C 102       7.272  67.947  33.011  1.00 46.62      1tnf C  
ATOM   3805  CD  GLN C 102       7.012  69.121  33.968  1.00 48.20      1tnf C  
ATOM   3806  NE2 GLN C 102       7.641  69.162  35.147  1.00 48.78      1tnf N  
ATOM   3807  OE1 GLN C 102       6.179  69.990  33.694  1.00 50.39      1tnf O  
ATOM   3808  HN  GLN C 102       5.237  65.034  32.952  1.00  0.00      1tnf H  
ATOM   3809 1HE2 GLN C 102       7.468  69.941  35.782  1.00  0.00      1tnf H  
ATOM   3810 2HE2 GLN C 102       8.329  68.444  35.373  1.00  0.00      1tnf H  
ATOM   3811  N   ARG C 103       3.010  68.689  33.197  1.00 43.53      1tnf N  
ATOM   3812  CA  ARG C 103       1.565  68.761  32.892  1.00 46.28      1tnf C  
ATOM   3813  C   ARG C 103       1.125  68.318  31.463  1.00 49.98      1tnf C  
ATOM   3814  O   ARG C 103       1.666  68.781  30.447  1.00 49.90      1tnf O  
ATOM   3815  CB  ARG C 103       1.047  70.200  33.184  1.00 43.55      1tnf C  
ATOM   3816  CG  ARG C 103       0.017  70.172  34.333  1.00 39.18      1tnf C  
ATOM   3817  CD  ARG C 103      -1.330  70.807  34.027  1.00 33.36      1tnf C  
ATOM   3818  NE  ARG C 103      -1.170  72.250  33.974  1.00 35.24      1tnf N  
ATOM   3819  CZ  ARG C 103      -1.904  73.101  34.709  1.00 33.53      1tnf C  
ATOM   3820  NH1 ARG C 103      -1.719  74.424  34.629  1.00 29.70      1tnf N1+
ATOM   3821  NH2 ARG C 103      -2.838  72.627  35.525  1.00 37.05      1tnf N  
ATOM   3822  HN  ARG C 103       3.527  69.503  33.531  1.00  0.00      1tnf H  
ATOM   3823  HE  ARG C 103      -0.464  72.636  33.347  1.00  0.00      1tnf H  
ATOM   3824 1HH1 ARG C 103      -1.001  74.788  34.002  1.00  0.00      1tnf H  
ATOM   3825 2HH1 ARG C 103      -2.277  75.070  35.187  1.00  0.00      1tnf H  
ATOM   3826 1HH2 ARG C 103      -2.979  71.619  35.586  1.00  0.00      1tnf H  
ATOM   3827 2HH2 ARG C 103      -3.396  73.273  36.083  1.00  0.00      1tnf H  
ATOM   3828  N   GLU C 104       0.255  67.269  31.464  1.00 51.29      1tnf N  
ATOM   3829  CA  GLU C 104      -0.299  66.663  30.252  1.00 54.31      1tnf C  
ATOM   3830  C   GLU C 104      -1.774  66.399  30.500  1.00 55.39      1tnf C  
ATOM   3831  O   GLU C 104      -2.672  66.709  29.698  1.00 55.16      1tnf O  
ATOM   3832  CB  GLU C 104       0.354  65.297  29.857  1.00 54.63      1tnf C  
ATOM   3833  CG  GLU C 104      -0.187  64.668  28.518  1.00 55.25      1tnf C  
ATOM   3834  CD  GLU C 104       0.282  63.248  28.111  1.00 56.02      1tnf C  
ATOM   3835  OE1 GLU C 104       1.468  63.115  27.816  1.00 57.05      1tnf O  
ATOM   3836  OE2 GLU C 104      -0.511  62.290  28.060  1.00 53.47      1tnf O1-
ATOM   3837  HN  GLU C 104      -0.028  66.882  32.365  1.00  0.00      1tnf H  
ATOM   3838  N   THR C 105      -1.976  65.772  31.659  1.00 56.59      1tnf N  
ATOM   3839  CA  THR C 105      -3.293  65.480  32.212  1.00 57.84      1tnf C  
ATOM   3840  C   THR C 105      -4.441  64.999  31.278  1.00 59.43      1tnf C  
ATOM   3841  O   THR C 105      -5.475  65.662  31.069  1.00 62.65      1tnf O  
ATOM   3842  CB  THR C 105      -3.646  66.770  33.045  1.00 57.64      1tnf C  
ATOM   3843  CG2 THR C 105      -2.965  66.668  34.388  1.00 55.24      1tnf C  
ATOM   3844  OG1 THR C 105      -3.185  67.978  32.402  1.00 58.43      1tnf O  
ATOM   3845  HN  THR C 105      -1.158  65.478  32.192  1.00  0.00      1tnf H  
ATOM   3846  HG1 THR C 105      -3.398  68.756  32.904  1.00  0.00      1tnf H  
ATOM   3847  N   PRO C 106      -4.283  63.798  30.684  1.00 57.81      1tnf N  
ATOM   3848  CA  PRO C 106      -5.207  63.170  29.745  1.00 57.36      1tnf C  
ATOM   3849  C   PRO C 106      -6.705  63.403  29.469  1.00 55.97      1tnf C  
ATOM   3850  O   PRO C 106      -7.532  62.541  29.807  1.00 54.18      1tnf O  
ATOM   3851  CB  PRO C 106      -4.910  61.701  30.022  1.00 56.73      1tnf C  
ATOM   3852  CG  PRO C 106      -3.408  61.745  29.914  1.00 57.98      1tnf C  
ATOM   3853  CD  PRO C 106      -3.117  62.929  30.838  1.00 57.66      1tnf C  
ATOM   3854  N   GLU C 107      -7.088  64.547  28.861  1.00 53.84      1tnf N  
ATOM   3855  CA  GLU C 107      -8.433  64.627  28.313  1.00 51.81      1tnf C  
ATOM   3856  C   GLU C 107      -8.241  64.132  26.884  1.00 52.68      1tnf C  
ATOM   3857  O   GLU C 107      -8.260  62.914  26.669  1.00 51.60      1tnf O  
ATOM   3858  CB  GLU C 107      -9.060  66.082  28.345  1.00 51.38      1tnf C  
ATOM   3859  CG  GLU C 107      -8.417  67.455  27.981  1.00 50.39      1tnf C  
ATOM   3860  CD  GLU C 107      -9.355  68.698  28.066  1.00 50.49      1tnf C  
ATOM   3861  OE1 GLU C 107     -10.589  68.537  28.102  1.00 49.44      1tnf O  
ATOM   3862  OE2 GLU C 107      -8.853  69.842  28.104  1.00 47.24      1tnf O1-
ATOM   3863  HN  GLU C 107      -6.448  65.338  28.788  1.00  0.00      1tnf H  
ATOM   3864  N   GLY C 108      -7.866  65.054  25.968  1.00 53.79      1tnf N  
ATOM   3865  CA  GLY C 108      -7.671  64.870  24.523  1.00 53.63      1tnf C  
ATOM   3866  C   GLY C 108      -7.681  63.437  24.028  1.00 51.87      1tnf C  
ATOM   3867  O   GLY C 108      -8.730  62.885  23.712  1.00 53.50      1tnf O  
ATOM   3868  HN  GLY C 108      -7.697  65.995  26.325  1.00  0.00      1tnf H  
ATOM   3869  N   ALA C 109      -6.524  62.802  24.031  1.00 50.86      1tnf N  
ATOM   3870  CA  ALA C 109      -6.429  61.427  23.579  1.00 49.64      1tnf C  
ATOM   3871  C   ALA C 109      -6.246  60.660  24.863  1.00 46.12      1tnf C  
ATOM   3872  O   ALA C 109      -5.142  60.452  25.362  1.00 43.95      1tnf O  
ATOM   3873  CB  ALA C 109      -5.208  61.234  22.653  1.00 50.34      1tnf C  
ATOM   3874  HN  ALA C 109      -5.686  63.284  24.355  1.00  0.00      1tnf H  
ATOM   3875  N   GLU C 110      -7.435  60.464  25.405  1.00 45.07      1tnf N  
ATOM   3876  CA  GLU C 110      -7.680  59.766  26.649  1.00 46.02      1tnf C  
ATOM   3877  C   GLU C 110      -6.716  58.626  26.975  1.00 47.25      1tnf C  
ATOM   3878  O   GLU C 110      -6.394  57.696  26.214  1.00 48.30      1tnf O  
ATOM   3879  CB  GLU C 110      -9.160  59.250  26.648  1.00 44.75      1tnf C  
ATOM   3880  CG  GLU C 110      -9.699  58.471  27.883  1.00 43.35      1tnf C  
ATOM   3881  CD  GLU C 110      -9.461  56.945  27.890  1.00 42.14      1tnf C  
ATOM   3882  OE1 GLU C 110      -8.946  56.405  28.876  1.00 39.84      1tnf O  
ATOM   3883  OE2 GLU C 110      -9.803  56.290  26.899  1.00 40.84      1tnf O1-
ATOM   3884  HN  GLU C 110      -8.245  60.834  24.907  1.00  0.00      1tnf H  
ATOM   3885  N   ALA C 111      -6.282  58.862  28.207  1.00 45.65      1tnf N  
ATOM   3886  CA  ALA C 111      -5.372  58.003  28.919  1.00 45.96      1tnf C  
ATOM   3887  C   ALA C 111      -4.446  56.985  28.246  1.00 44.39      1tnf C  
ATOM   3888  O   ALA C 111      -4.833  55.818  28.170  1.00 44.89      1tnf O  
ATOM   3889  CB  ALA C 111      -6.184  57.241  29.970  1.00 47.11      1tnf C  
ATOM   3890  HN  ALA C 111      -6.614  59.704  28.678  1.00  0.00      1tnf H  
ATOM   3891  N   LYS C 112      -3.244  57.354  27.766  1.00 40.42      1tnf N  
ATOM   3892  CA  LYS C 112      -2.344  56.286  27.375  1.00 42.29      1tnf C  
ATOM   3893  C   LYS C 112      -1.079  56.167  28.261  1.00 39.12      1tnf C  
ATOM   3894  O   LYS C 112      -0.379  57.151  28.507  1.00 39.61      1tnf O  
ATOM   3895  CB  LYS C 112      -1.985  56.455  25.875  1.00 45.46      1tnf C  
ATOM   3896  CG  LYS C 112      -0.588  56.911  25.431  1.00 48.70      1tnf C  
ATOM   3897  CD  LYS C 112      -0.294  58.393  25.741  1.00 52.20      1tnf C  
ATOM   3898  CE  LYS C 112      -1.281  59.395  25.111  1.00 53.18      1tnf C  
ATOM   3899  NZ  LYS C 112      -1.171  59.358  23.660  1.00 55.17      1tnf N1+
ATOM   3900  HN  LYS C 112      -2.979  58.335  27.681  1.00  0.00      1tnf H  
ATOM   3901  HZ1 LYS C 112      -1.824  60.021  23.243  1.00  0.00      1tnf H  
ATOM   3902  HZ2 LYS C 112      -1.296  58.415  23.291  1.00  0.00      1tnf H  
ATOM   3903  HZ3 LYS C 112      -0.214  59.515  23.345  1.00  0.00      1tnf H  
ATOM   3904  N   PRO C 113      -0.761  54.957  28.752  1.00 33.65      1tnf N  
ATOM   3905  CA  PRO C 113       0.191  54.645  29.824  1.00 29.90      1tnf C  
ATOM   3906  C   PRO C 113       1.651  55.083  29.995  1.00 26.82      1tnf C  
ATOM   3907  O   PRO C 113       2.432  55.095  29.031  1.00 26.45      1tnf O  
ATOM   3908  CB  PRO C 113       0.087  53.122  29.873  1.00 31.31      1tnf C  
ATOM   3909  CG  PRO C 113      -0.298  52.734  28.459  1.00 28.38      1tnf C  
ATOM   3910  CD  PRO C 113      -1.413  53.727  28.310  1.00 31.07      1tnf C  
ATOM   3911  N   TRP C 114       2.047  55.367  31.241  1.00 23.44      1tnf N  
ATOM   3912  CA  TRP C 114       3.445  55.521  31.617  1.00 21.40      1tnf C  
ATOM   3913  C   TRP C 114       3.921  54.292  32.392  1.00 16.69      1tnf C  
ATOM   3914  O   TRP C 114       3.147  53.467  32.880  1.00 18.04      1tnf O  
ATOM   3915  CB  TRP C 114       3.716  56.741  32.507  1.00 24.02      1tnf C  
ATOM   3916  CG  TRP C 114       2.770  57.173  33.632  1.00 28.25      1tnf C  
ATOM   3917  CD1 TRP C 114       1.795  58.114  33.401  1.00 28.69      1tnf C  
ATOM   3918  CD2 TRP C 114       2.833  56.800  34.961  1.00 28.45      1tnf C  
ATOM   3919  CE2 TRP C 114       1.838  57.594  35.517  1.00 28.87      1tnf C  
ATOM   3920  CE3 TRP C 114       3.563  55.940  35.756  1.00 27.78      1tnf C  
ATOM   3921  NE1 TRP C 114       1.257  58.346  34.570  1.00 28.68      1tnf N  
ATOM   3922  CZ2 TRP C 114       1.554  57.545  36.864  1.00 28.24      1tnf C  
ATOM   3923  CZ3 TRP C 114       3.282  55.893  37.099  1.00 28.39      1tnf C  
ATOM   3924  CH2 TRP C 114       2.291  56.683  37.643  1.00 26.37      1tnf C  
ATOM   3925  HN  TRP C 114       1.335  55.481  31.962  1.00  0.00      1tnf H  
ATOM   3926  HE1 TRP C 114       0.500  59.008  34.739  1.00  0.00      1tnf H  
ATOM   3927  N   TYR C 115       5.205  54.107  32.471  1.00 11.01      1tnf N  
ATOM   3928  CA  TYR C 115       5.780  53.029  33.200  1.00  8.96      1tnf C  
ATOM   3929  C   TYR C 115       6.949  53.695  33.833  1.00 12.10      1tnf C  
ATOM   3930  O   TYR C 115       7.690  54.401  33.143  1.00  9.66      1tnf O  
ATOM   3931  CB  TYR C 115       6.296  51.947  32.334  1.00  7.53      1tnf C  
ATOM   3932  CG  TYR C 115       5.179  51.060  31.900  1.00  8.51      1tnf C  
ATOM   3933  CD1 TYR C 115       4.506  51.426  30.755  1.00 10.83      1tnf C  
ATOM   3934  CD2 TYR C 115       4.831  49.957  32.641  1.00  8.49      1tnf C  
ATOM   3935  CE1 TYR C 115       3.443  50.683  30.333  1.00 12.71      1tnf C  
ATOM   3936  CE2 TYR C 115       3.766  49.198  32.216  1.00 14.15      1tnf C  
ATOM   3937  CZ  TYR C 115       3.078  49.566  31.067  1.00 15.40      1tnf C  
ATOM   3938  OH  TYR C 115       1.992  48.822  30.617  1.00 17.19      1tnf O  
ATOM   3939  HN  TYR C 115       5.825  54.760  31.992  1.00  0.00      1tnf H  
ATOM   3940  HH  TYR C 115       1.742  48.056  31.120  1.00  0.00      1tnf H  
ATOM   3941  N   GLU C 116       7.092  53.450  35.142  1.00 15.98      1tnf N  
ATOM   3942  CA  GLU C 116       8.139  54.041  35.922  1.00 13.20      1tnf C  
ATOM   3943  C   GLU C 116       8.789  52.962  36.757  1.00 14.20      1tnf C  
ATOM   3944  O   GLU C 116       8.175  52.528  37.735  1.00 19.07      1tnf O  
ATOM   3945  CB  GLU C 116       7.412  55.082  36.688  1.00 16.20      1tnf C  
ATOM   3946  CG  GLU C 116       8.155  56.359  36.862  1.00 18.87      1tnf C  
ATOM   3947  CD  GLU C 116       8.693  56.834  35.544  1.00 20.51      1tnf C  
ATOM   3948  OE1 GLU C 116       9.913  56.881  35.426  1.00 21.96      1tnf O  
ATOM   3949  OE2 GLU C 116       7.896  57.121  34.654  1.00 22.71      1tnf O1-
ATOM   3950  HN  GLU C 116       6.433  52.821  35.600  1.00  0.00      1tnf H  
ATOM   3951  N   PRO C 117       9.942  52.378  36.428  1.00 12.93      1tnf N  
ATOM   3952  CA  PRO C 117      10.588  51.441  37.331  1.00 14.45      1tnf C  
ATOM   3953  C   PRO C 117      11.357  52.185  38.448  1.00 18.30      1tnf C  
ATOM   3954  O   PRO C 117      11.843  53.274  38.151  1.00 24.87      1tnf O  
ATOM   3955  CB  PRO C 117      11.432  50.615  36.383  1.00 10.16      1tnf C  
ATOM   3956  CG  PRO C 117      11.846  51.594  35.327  1.00  8.34      1tnf C  
ATOM   3957  CD  PRO C 117      10.588  52.424  35.128  1.00  9.50      1tnf C  
ATOM   3958  N   ILE C 118      11.480  51.805  39.723  1.00 15.72      1tnf N  
ATOM   3959  CA  ILE C 118      12.463  52.432  40.614  1.00 13.20      1tnf C  
ATOM   3960  C   ILE C 118      13.165  51.223  41.187  1.00 14.74      1tnf C  
ATOM   3961  O   ILE C 118      12.538  50.193  41.530  1.00 13.79      1tnf O  
ATOM   3962  CB  ILE C 118      11.903  53.236  41.837  1.00 12.81      1tnf C  
ATOM   3963  CG1 ILE C 118      10.980  54.348  41.414  1.00 11.17      1tnf C  
ATOM   3964  CG2 ILE C 118      13.093  53.801  42.603  1.00 12.94      1tnf C  
ATOM   3965  CD1 ILE C 118      10.428  55.206  42.533  1.00 10.87      1tnf C  
ATOM   3966  HN  ILE C 118      10.879  51.064  40.084  1.00  0.00      1tnf H  
ATOM   3967  N   TYR C 119      14.486  51.362  41.222  1.00 13.46      1tnf N  
ATOM   3968  CA  TYR C 119      15.300  50.297  41.785  1.00 14.18      1tnf C  
ATOM   3969  C   TYR C 119      16.315  50.990  42.707  1.00 13.04      1tnf C  
ATOM   3970  O   TYR C 119      16.809  52.066  42.363  1.00 10.48      1tnf O  
ATOM   3971  CB  TYR C 119      16.016  49.489  40.671  1.00 11.19      1tnf C  
ATOM   3972  CG  TYR C 119      16.998  48.458  41.243  1.00 13.32      1tnf C  
ATOM   3973  CD1 TYR C 119      16.594  47.140  41.361  1.00 12.07      1tnf C  
ATOM   3974  CD2 TYR C 119      18.285  48.832  41.619  1.00 10.56      1tnf C  
ATOM   3975  CE1 TYR C 119      17.457  46.188  41.836  1.00  9.86      1tnf C  
ATOM   3976  CE2 TYR C 119      19.142  47.886  42.093  1.00  9.60      1tnf C  
ATOM   3977  CZ  TYR C 119      18.722  46.575  42.186  1.00 11.43      1tnf C  
ATOM   3978  OH  TYR C 119      19.629  45.595  42.553  1.00 15.60      1tnf O  
ATOM   3979  HN  TYR C 119      14.925  52.208  40.857  1.00  0.00      1tnf H  
ATOM   3980  HH  TYR C 119      20.507  45.864  42.796  1.00  0.00      1tnf H  
ATOM   3981  N   LEU C 120      16.506  50.330  43.859  1.00 10.98      1tnf N  
ATOM   3982  CA  LEU C 120      17.363  50.705  44.961  1.00 13.20      1tnf C  
ATOM   3983  C   LEU C 120      18.335  49.517  45.202  1.00 13.78      1tnf C  
ATOM   3984  O   LEU C 120      17.969  48.333  45.071  1.00 12.02      1tnf O  
ATOM   3985  CB  LEU C 120      16.509  50.940  46.225  1.00 14.84      1tnf C  
ATOM   3986  CG  LEU C 120      15.522  52.070  46.376  1.00 15.18      1tnf C  
ATOM   3987  CD1 LEU C 120      14.598  51.851  47.543  1.00 14.99      1tnf C  
ATOM   3988  CD2 LEU C 120      16.305  53.330  46.582  1.00 16.60      1tnf C  
ATOM   3989  HN  LEU C 120      15.985  49.460  43.971  1.00  0.00      1tnf H  
ATOM   3990  N   GLY C 121      19.552  49.852  45.594  1.00 11.42      1tnf N  
ATOM   3991  CA  GLY C 121      20.623  48.914  45.820  1.00 13.70      1tnf C  
ATOM   3992  C   GLY C 121      21.623  49.476  46.851  1.00 12.38      1tnf C  
ATOM   3993  O   GLY C 121      21.973  50.652  46.777  1.00  8.17      1tnf O  
ATOM   3994  HN  GLY C 121      19.747  50.842  45.747  1.00  0.00      1tnf H  
ATOM   3995  N   GLY C 122      22.121  48.716  47.820  1.00 10.33      1tnf N  
ATOM   3996  CA  GLY C 122      23.011  49.350  48.776  1.00 13.13      1tnf C  
ATOM   3997  C   GLY C 122      23.515  48.400  49.807  1.00 13.00      1tnf C  
ATOM   3998  O   GLY C 122      22.877  47.442  50.221  1.00 16.04      1tnf O  
ATOM   3999  HN  GLY C 122      21.887  47.726  47.890  1.00  0.00      1tnf H  
ATOM   4000  N   VAL C 123      24.744  48.648  50.172  1.00 15.75      1tnf N  
ATOM   4001  CA  VAL C 123      25.407  47.749  51.092  1.00 18.41      1tnf C  
ATOM   4002  C   VAL C 123      25.422  48.409  52.459  1.00 18.62      1tnf C  
ATOM   4003  O   VAL C 123      26.029  49.474  52.607  1.00 19.64      1tnf O  
ATOM   4004  CB  VAL C 123      26.778  47.499  50.451  1.00 17.77      1tnf C  
ATOM   4005  CG1 VAL C 123      27.892  47.080  51.389  1.00 20.52      1tnf C  
ATOM   4006  CG2 VAL C 123      26.481  46.411  49.438  1.00 19.52      1tnf C  
ATOM   4007  HN  VAL C 123      25.232  49.468  49.812  1.00  0.00      1tnf H  
ATOM   4008  N   PHE C 124      24.645  47.827  53.378  1.00 14.21      1tnf N  
ATOM   4009  CA  PHE C 124      24.544  48.334  54.742  1.00 17.29      1tnf C  
ATOM   4010  C   PHE C 124      24.778  47.275  55.803  1.00 17.27      1tnf C  
ATOM   4011  O   PHE C 124      24.420  46.109  55.665  1.00 11.96      1tnf O  
ATOM   4012  CB  PHE C 124      23.164  48.951  55.036  1.00 12.64      1tnf C  
ATOM   4013  CG  PHE C 124      22.818  50.086  54.085  1.00 13.95      1tnf C  
ATOM   4014  CD1 PHE C 124      22.094  49.840  52.926  1.00 13.05      1tnf C  
ATOM   4015  CD2 PHE C 124      23.231  51.369  54.381  1.00 14.42      1tnf C  
ATOM   4016  CE1 PHE C 124      21.776  50.864  52.076  1.00 12.66      1tnf C  
ATOM   4017  CE2 PHE C 124      22.913  52.403  53.526  1.00 14.71      1tnf C  
ATOM   4018  CZ  PHE C 124      22.182  52.145  52.383  1.00 15.78      1tnf C  
ATOM   4019  HN  PHE C 124      24.105  47.002  53.117  1.00  0.00      1tnf H  
ATOM   4020  N   GLN C 125      25.490  47.752  56.815  1.00 19.80      1tnf N  
ATOM   4021  CA  GLN C 125      25.681  47.079  58.106  1.00 26.65      1tnf C  
ATOM   4022  C   GLN C 125      24.383  47.059  58.957  1.00 26.15      1tnf C  
ATOM   4023  O   GLN C 125      23.877  48.079  59.452  1.00 25.45      1tnf O  
ATOM   4024  CB  GLN C 125      26.762  47.788  58.957  1.00 29.82      1tnf C  
ATOM   4025  CG  GLN C 125      26.794  47.336  60.429  1.00 32.24      1tnf C  
ATOM   4026  CD  GLN C 125      27.725  46.167  60.691  1.00 36.29      1tnf C  
ATOM   4027  NE2 GLN C 125      27.297  44.897  60.650  1.00 33.85      1tnf N  
ATOM   4028  OE1 GLN C 125      28.909  46.473  60.946  1.00 37.05      1tnf O  
ATOM   4029  HN  GLN C 125      25.941  48.658  56.686  1.00  0.00      1tnf H  
ATOM   4030 1HE2 GLN C 125      26.330  44.647  60.442  1.00  0.00      1tnf H  
ATOM   4031 2HE2 GLN C 125      27.923  44.111  60.826  1.00  0.00      1tnf H  
ATOM   4032  N   LEU C 126      23.898  45.843  59.123  1.00 25.93      1tnf N  
ATOM   4033  CA  LEU C 126      22.733  45.545  59.921  1.00 28.15      1tnf C  
ATOM   4034  C   LEU C 126      23.209  44.861  61.198  1.00 26.79      1tnf C  
ATOM   4035  O   LEU C 126      24.416  44.682  61.454  1.00 23.61      1tnf O  
ATOM   4036  CB  LEU C 126      21.790  44.624  59.096  1.00 33.40      1tnf C  
ATOM   4037  CG  LEU C 126      20.712  45.250  58.156  1.00 34.76      1tnf C  
ATOM   4038  CD1 LEU C 126      20.236  44.238  57.137  1.00 33.94      1tnf C  
ATOM   4039  CD2 LEU C 126      19.475  45.642  58.954  1.00 35.93      1tnf C  
ATOM   4040  HN  LEU C 126      24.374  45.069  58.660  1.00  0.00      1tnf H  
ATOM   4041  N   GLU C 127      22.223  44.403  61.979  1.00 27.94      1tnf N  
ATOM   4042  CA  GLU C 127      22.434  43.740  63.261  1.00 24.22      1tnf C  
ATOM   4043  C   GLU C 127      21.334  42.738  63.650  1.00 21.41      1tnf C  
ATOM   4044  O   GLU C 127      20.172  42.908  63.331  1.00 17.50      1tnf O  
ATOM   4045  CB  GLU C 127      22.576  44.799  64.314  1.00 23.17      1tnf C  
ATOM   4046  CG  GLU C 127      23.892  44.446  64.948  1.00 28.04      1tnf C  
ATOM   4047  CD  GLU C 127      24.768  45.624  65.368  1.00 33.60      1tnf C  
ATOM   4048  OE1 GLU C 127      25.926  45.700  64.927  1.00 35.99      1tnf O  
ATOM   4049  OE2 GLU C 127      24.293  46.450  66.149  1.00 34.75      1tnf O1-
ATOM   4050  HN  GLU C 127      21.263  44.525  61.657  1.00  0.00      1tnf H  
ATOM   4051  N   LYS C 128      21.769  41.647  64.283  1.00 23.66      1tnf N  
ATOM   4052  CA  LYS C 128      20.957  40.560  64.749  1.00 24.41      1tnf C  
ATOM   4053  C   LYS C 128      19.615  40.957  65.335  1.00 23.92      1tnf C  
ATOM   4054  O   LYS C 128      19.494  41.610  66.377  1.00 28.08      1tnf O  
ATOM   4055  CB  LYS C 128      21.734  39.777  65.785  1.00 25.04      1tnf C  
ATOM   4056  CG  LYS C 128      21.153  38.371  65.873  1.00 27.90      1tnf C  
ATOM   4057  CD  LYS C 128      21.931  37.520  66.884  1.00 32.14      1tnf C  
ATOM   4058  CE  LYS C 128      21.241  36.146  67.071  1.00 36.52      1tnf C  
ATOM   4059  NZ  LYS C 128      22.223  35.093  67.371  1.00 36.52      1tnf N1+
ATOM   4060  HN  LYS C 128      22.773  41.579  64.451  1.00  0.00      1tnf H  
ATOM   4061  HZ1 LYS C 128      21.769  34.188  67.494  1.00  0.00      1tnf H  
ATOM   4062  HZ2 LYS C 128      22.799  35.336  68.177  1.00  0.00      1tnf H  
ATOM   4063  HZ3 LYS C 128      22.956  35.051  66.663  1.00  0.00      1tnf H  
ATOM   4064  N   GLY C 129      18.638  40.569  64.530  1.00 20.85      1tnf N  
ATOM   4065  CA  GLY C 129      17.245  40.704  64.830  1.00 20.46      1tnf C  
ATOM   4066  C   GLY C 129      16.614  41.909  64.185  1.00 19.81      1tnf C  
ATOM   4067  O   GLY C 129      15.415  42.068  64.370  1.00 23.65      1tnf O  
ATOM   4068  HN  GLY C 129      18.895  40.146  63.638  1.00  0.00      1tnf H  
ATOM   4069  N   ASP C 130      17.343  42.773  63.466  1.00 21.10      1tnf N  
ATOM   4070  CA  ASP C 130      16.821  43.992  62.837  1.00 16.15      1tnf C  
ATOM   4071  C   ASP C 130      15.782  43.714  61.781  1.00 16.59      1tnf C  
ATOM   4072  O   ASP C 130      15.824  42.694  61.079  1.00 17.60      1tnf O  
ATOM   4073  CB  ASP C 130      17.905  44.767  62.180  1.00 16.60      1tnf C  
ATOM   4074  CG  ASP C 130      18.693  45.716  63.064  1.00 18.33      1tnf C  
ATOM   4075  OD1 ASP C 130      19.911  45.755  62.989  1.00 17.81      1tnf O  
ATOM   4076  OD2 ASP C 130      18.098  46.476  63.803  1.00 20.73      1tnf O1-
ATOM   4077  HN  ASP C 130      18.335  42.568  63.347  1.00  0.00      1tnf H  
ATOM   4078  N   ARG C 131      14.813  44.607  61.717  1.00 17.77      1tnf N  
ATOM   4079  CA  ARG C 131      13.707  44.451  60.773  1.00 20.09      1tnf C  
ATOM   4080  C   ARG C 131      13.889  45.355  59.554  1.00 17.12      1tnf C  
ATOM   4081  O   ARG C 131      14.493  46.430  59.668  1.00 14.64      1tnf O  
ATOM   4082  CB  ARG C 131      12.415  44.805  61.472  1.00 23.93      1tnf C  
ATOM   4083  CG  ARG C 131      11.543  43.676  61.941  1.00 29.55      1tnf C  
ATOM   4084  CD  ARG C 131      11.701  43.522  63.452  1.00 32.87      1tnf C  
ATOM   4085  NE  ARG C 131      11.097  42.257  63.839  1.00 34.92      1tnf N  
ATOM   4086  CZ  ARG C 131       9.799  42.163  64.132  1.00 36.64      1tnf C  
ATOM   4087  NH1 ARG C 131       9.298  40.952  64.393  1.00 35.65      1tnf N1+
ATOM   4088  NH2 ARG C 131       9.036  43.270  64.241  1.00 39.01      1tnf N  
ATOM   4089  HN  ARG C 131      14.836  45.418  62.335  1.00  0.00      1tnf H  
ATOM   4090  HE  ARG C 131      11.680  41.421  63.888  1.00  0.00      1tnf H  
ATOM   4091 1HH1 ARG C 131       9.875  40.115  64.311  1.00  0.00      1tnf H  
ATOM   4092 2HH1 ARG C 131       8.306  40.880  64.617  1.00  0.00      1tnf H  
ATOM   4093 1HH2 ARG C 131       9.418  44.194  64.042  1.00  0.00      1tnf H  
ATOM   4094 2HH2 ARG C 131       8.044  43.198  64.465  1.00  0.00      1tnf H  
ATOM   4095  N   LEU C 132      13.367  44.979  58.391  1.00 17.94      1tnf N  
ATOM   4096  CA  LEU C 132      13.615  45.715  57.157  1.00 17.88      1tnf C  
ATOM   4097  C   LEU C 132      12.342  46.021  56.392  1.00 17.87      1tnf C  
ATOM   4098  O   LEU C 132      11.551  45.141  56.029  1.00 13.86      1tnf O  
ATOM   4099  CB  LEU C 132      14.568  44.892  56.304  1.00 19.93      1tnf C  
ATOM   4100  CG  LEU C 132      15.888  45.425  55.777  1.00 22.19      1tnf C  
ATOM   4101  CD1 LEU C 132      16.527  46.355  56.798  1.00 20.45      1tnf C  
ATOM   4102  CD2 LEU C 132      16.791  44.231  55.425  1.00 19.60      1tnf C  
ATOM   4103  HN  LEU C 132      12.774  44.149  58.361  1.00  0.00      1tnf H  
ATOM   4104  N   SER C 133      12.120  47.281  56.135  1.00 15.90      1tnf N  
ATOM   4105  CA  SER C 133      10.929  47.611  55.418  1.00 21.76      1tnf C  
ATOM   4106  C   SER C 133      11.100  48.188  54.009  1.00 22.80      1tnf C  
ATOM   4107  O   SER C 133      11.898  49.102  53.789  1.00 22.42      1tnf O  
ATOM   4108  CB  SER C 133      10.146  48.552  56.326  1.00 22.54      1tnf C  
ATOM   4109  OG  SER C 133       8.781  48.144  56.326  1.00 24.90      1tnf O  
ATOM   4110  HN  SER C 133      12.773  48.004  56.435  1.00  0.00      1tnf H  
ATOM   4111  HG  SER C 133       8.293  48.731  56.892  1.00  0.00      1tnf H  
ATOM   4112  N   ALA C 134      10.391  47.645  53.013  1.00 23.36      1tnf N  
ATOM   4113  CA  ALA C 134      10.327  48.292  51.688  1.00 21.92      1tnf C  
ATOM   4114  C   ALA C 134       8.881  48.835  51.521  1.00 16.23      1tnf C  
ATOM   4115  O   ALA C 134       7.910  48.070  51.552  1.00 10.71      1tnf O  
ATOM   4116  CB  ALA C 134      10.675  47.266  50.562  1.00 15.84      1tnf C  
ATOM   4117  HN  ALA C 134       9.888  46.772  53.171  1.00  0.00      1tnf H  
ATOM   4118  N   GLU C 135       8.695  50.150  51.453  1.00 15.03      1tnf N  
ATOM   4119  CA  GLU C 135       7.358  50.773  51.329  1.00 18.17      1tnf C  
ATOM   4120  C   GLU C 135       7.288  51.726  50.135  1.00 19.00      1tnf C  
ATOM   4121  O   GLU C 135       8.256  52.376  49.686  1.00 19.18      1tnf O  
ATOM   4122  CB  GLU C 135       6.940  51.659  52.505  1.00 17.51      1tnf C  
ATOM   4123  CG  GLU C 135       7.215  51.104  53.898  1.00 25.93      1tnf C  
ATOM   4124  CD  GLU C 135       7.451  52.133  55.012  1.00 26.96      1tnf C  
ATOM   4125  OE1 GLU C 135       6.461  52.504  55.661  1.00 27.41      1tnf O  
ATOM   4126  OE2 GLU C 135       8.612  52.532  55.208  1.00 25.69      1tnf O1-
ATOM   4127  HN  GLU C 135       9.513  50.759  51.488  1.00  0.00      1tnf H  
ATOM   4128  N   ILE C 136       6.077  51.829  49.607  1.00 17.42      1tnf N  
ATOM   4129  CA  ILE C 136       5.847  52.783  48.544  1.00 15.76      1tnf C  
ATOM   4130  C   ILE C 136       4.816  53.753  49.025  1.00 14.55      1tnf C  
ATOM   4131  O   ILE C 136       4.077  53.385  49.916  1.00 16.36      1tnf O  
ATOM   4132  CB  ILE C 136       5.340  52.132  47.279  1.00 12.23      1tnf C  
ATOM   4133  CG1 ILE C 136       4.253  51.125  47.583  1.00 13.34      1tnf C  
ATOM   4134  CG2 ILE C 136       6.533  51.557  46.583  1.00 14.51      1tnf C  
ATOM   4135  CD1 ILE C 136       3.457  50.717  46.352  1.00 17.81      1tnf C  
ATOM   4136  HN  ILE C 136       5.315  51.242  49.946  1.00  0.00      1tnf H  
ATOM   4137  N   ASN C 137       4.670  54.948  48.490  1.00 15.88      1tnf N  
ATOM   4138  CA  ASN C 137       3.625  55.826  48.989  1.00 21.52      1tnf C  
ATOM   4139  C   ASN C 137       2.333  55.741  48.215  1.00 22.50      1tnf C  
ATOM   4140  O   ASN C 137       1.315  56.293  48.655  1.00 22.76      1tnf O  
ATOM   4141  CB  ASN C 137       4.052  57.288  48.977  1.00 23.67      1tnf C  
ATOM   4142  CG  ASN C 137       4.164  57.834  47.570  1.00 27.38      1tnf C  
ATOM   4143  ND2 ASN C 137       3.935  59.141  47.560  1.00 30.41      1tnf N  
ATOM   4144  OD1 ASN C 137       4.459  57.112  46.588  1.00 23.84      1tnf O  
ATOM   4145  HN  ASN C 137       5.283  55.253  47.734  1.00  0.00      1tnf H  
ATOM   4146 1HD2 ASN C 137       4.010  59.509  46.612  1.00  0.00      1tnf H  
ATOM   4147 2HD2 ASN C 137       3.695  59.728  48.359  1.00  0.00      1tnf H  
ATOM   4148  N   ARG C 138       2.340  55.096  47.055  1.00 22.25      1tnf N  
ATOM   4149  CA  ARG C 138       1.123  55.037  46.286  1.00 23.52      1tnf C  
ATOM   4150  C   ARG C 138       0.967  53.622  45.758  1.00 27.49      1tnf C  
ATOM   4151  O   ARG C 138       1.290  53.293  44.631  1.00 26.52      1tnf O  
ATOM   4152  CB  ARG C 138       1.176  56.095  45.153  1.00 21.02      1tnf C  
ATOM   4153  CG  ARG C 138       1.071  57.582  45.597  1.00 20.46      1tnf C  
ATOM   4154  CD  ARG C 138       0.325  58.501  44.621  1.00 19.32      1tnf C  
ATOM   4155  NE  ARG C 138      -0.970  57.951  44.194  1.00 18.10      1tnf N  
ATOM   4156  CZ  ARG C 138      -1.841  58.622  43.419  1.00 20.46      1tnf C  
ATOM   4157  NH1 ARG C 138      -2.927  58.025  42.965  1.00 17.67      1tnf N1+
ATOM   4158  NH2 ARG C 138      -1.679  59.898  43.074  1.00 22.47      1tnf N  
ATOM   4159  HN  ARG C 138       3.192  54.650  46.714  1.00  0.00      1tnf H  
ATOM   4160  HE  ARG C 138      -1.221  57.011  44.502  1.00  0.00      1tnf H  
ATOM   4161 1HH1 ARG C 138      -3.051  57.048  43.229  1.00  0.00      1tnf H  
ATOM   4162 2HH1 ARG C 138      -3.587  58.534  42.377  1.00  0.00      1tnf H  
ATOM   4163 1HH2 ARG C 138      -0.840  60.359  43.425  1.00  0.00      1tnf H  
ATOM   4164 2HH2 ARG C 138      -2.339  60.407  42.486  1.00  0.00      1tnf H  
ATOM   4165  N   PRO C 139       0.437  52.697  46.539  1.00 30.96      1tnf N  
ATOM   4166  CA  PRO C 139       0.098  51.357  46.062  1.00 33.00      1tnf C  
ATOM   4167  C   PRO C 139      -1.082  51.288  45.097  1.00 32.53      1tnf C  
ATOM   4168  O   PRO C 139      -1.458  50.175  44.710  1.00 37.28      1tnf O  
ATOM   4169  CB  PRO C 139      -0.127  50.549  47.336  1.00 31.44      1tnf C  
ATOM   4170  CG  PRO C 139      -0.738  51.626  48.202  1.00 36.21      1tnf C  
ATOM   4171  CD  PRO C 139       0.117  52.869  47.952  1.00 31.60      1tnf C  
ATOM   4172  N   ASP C 140      -1.745  52.397  44.747  1.00 29.20      1tnf N  
ATOM   4173  CA  ASP C 140      -2.717  52.324  43.660  1.00 28.35      1tnf C  
ATOM   4174  C   ASP C 140      -1.993  52.100  42.315  1.00 30.23      1tnf C  
ATOM   4175  O   ASP C 140      -2.453  51.319  41.479  1.00 31.02      1tnf O  
ATOM   4176  CB  ASP C 140      -3.579  53.607  43.503  1.00 26.03      1tnf C  
ATOM   4177  CG  ASP C 140      -3.046  54.962  43.964  1.00 25.26      1tnf C  
ATOM   4178  OD1 ASP C 140      -1.840  55.144  44.154  1.00 21.16      1tnf O  
ATOM   4179  OD2 ASP C 140      -3.902  55.833  44.138  1.00 24.28      1tnf O1-
ATOM   4180  HN  ASP C 140      -1.574  53.278  45.232  1.00  0.00      1tnf H  
ATOM   4181  N   TYR C 141      -0.809  52.695  42.110  1.00 23.39      1tnf N  
ATOM   4182  CA  TYR C 141      -0.123  52.572  40.855  1.00 17.11      1tnf C  
ATOM   4183  C   TYR C 141       0.712  51.331  40.701  1.00 19.59      1tnf C  
ATOM   4184  O   TYR C 141       1.704  51.371  39.965  1.00 19.38      1tnf O  
ATOM   4185  CB  TYR C 141       0.746  53.778  40.686  1.00 18.33      1tnf C  
ATOM   4186  CG  TYR C 141      -0.024  55.009  40.335  1.00 14.60      1tnf C  
ATOM   4187  CD1 TYR C 141       0.343  56.188  40.905  1.00 13.96      1tnf C  
ATOM   4188  CD2 TYR C 141      -1.061  54.935  39.449  1.00 13.70      1tnf C  
ATOM   4189  CE1 TYR C 141      -0.366  57.313  40.566  1.00 17.87      1tnf C  
ATOM   4190  CE2 TYR C 141      -1.769  56.043  39.110  1.00 13.16      1tnf C  
ATOM   4191  CZ  TYR C 141      -1.424  57.226  39.675  1.00 15.50      1tnf C  
ATOM   4192  OH  TYR C 141      -2.193  58.338  39.386  1.00 18.94      1tnf O  
ATOM   4193  HN  TYR C 141      -0.388  53.245  42.859  1.00  0.00      1tnf H  
ATOM   4194  HH  TYR C 141      -1.951  59.167  39.782  1.00  0.00      1tnf H  
ATOM   4195  N   LEU C 142       0.364  50.211  41.311  1.00 21.77      1tnf N  
ATOM   4196  CA  LEU C 142       1.255  49.082  41.212  1.00 25.93      1tnf C  
ATOM   4197  C   LEU C 142       0.812  48.176  40.087  1.00 29.40      1tnf C  
ATOM   4198  O   LEU C 142      -0.386  47.854  40.038  1.00 29.31      1tnf O  
ATOM   4199  CB  LEU C 142       1.289  48.288  42.528  1.00 26.37      1tnf C  
ATOM   4200  CG  LEU C 142       2.321  48.563  43.650  1.00 26.15      1tnf C  
ATOM   4201  CD1 LEU C 142       2.067  47.597  44.833  1.00 19.68      1tnf C  
ATOM   4202  CD2 LEU C 142       3.753  48.402  43.101  1.00 26.48      1tnf C  
ATOM   4203  HN  LEU C 142      -0.508  50.148  41.836  1.00  0.00      1tnf H  
ATOM   4204  N   LEU C 143       1.754  47.819  39.184  1.00 32.84      1tnf N  
ATOM   4205  CA  LEU C 143       1.454  46.885  38.115  1.00 36.67      1tnf C  
ATOM   4206  C   LEU C 143       1.599  45.444  38.592  1.00 39.40      1tnf C  
ATOM   4207  O   LEU C 143       2.397  45.088  39.462  1.00 39.66      1tnf O  
ATOM   4208  CB  LEU C 143       2.379  47.085  36.882  1.00 37.23      1tnf C  
ATOM   4209  CG  LEU C 143       2.127  46.164  35.624  1.00 38.77      1tnf C  
ATOM   4210  CD1 LEU C 143       2.360  46.886  34.307  1.00 41.14      1tnf C  
ATOM   4211  CD2 LEU C 143       3.084  44.993  35.651  1.00 35.58      1tnf C  
ATOM   4212  HN  LEU C 143       2.692  48.213  39.256  1.00  0.00      1tnf H  
ATOM   4213  N   PHE C 144       0.844  44.588  37.916  1.00 42.68      1tnf N  
ATOM   4214  CA  PHE C 144       0.796  43.170  38.201  1.00 44.17      1tnf C  
ATOM   4215  C   PHE C 144       1.281  42.294  37.033  1.00 43.28      1tnf C  
ATOM   4216  O   PHE C 144       0.655  42.300  35.966  1.00 41.48      1tnf O  
ATOM   4217  CB  PHE C 144      -0.665  42.795  38.560  1.00 46.45      1tnf C  
ATOM   4218  CG  PHE C 144      -1.334  43.570  39.700  1.00 47.87      1tnf C  
ATOM   4219  CD1 PHE C 144      -0.653  43.862  40.873  1.00 49.40      1tnf C  
ATOM   4220  CD2 PHE C 144      -2.668  43.931  39.589  1.00 48.61      1tnf C  
ATOM   4221  CE1 PHE C 144      -1.312  44.505  41.914  1.00 50.46      1tnf C  
ATOM   4222  CE2 PHE C 144      -3.320  44.570  40.639  1.00 48.33      1tnf C  
ATOM   4223  CZ  PHE C 144      -2.650  44.861  41.805  1.00 48.38      1tnf C  
ATOM   4224  HN  PHE C 144       0.267  44.948  37.156  1.00  0.00      1tnf H  
ATOM   4225  N   ALA C 145       2.416  41.604  37.116  1.00 44.88      1tnf N  
ATOM   4226  CA  ALA C 145       2.735  40.537  36.149  1.00 46.40      1tnf C  
ATOM   4227  C   ALA C 145       3.991  39.914  36.732  1.00 46.11      1tnf C  
ATOM   4228  O   ALA C 145       5.051  39.715  36.143  1.00 47.93      1tnf O  
ATOM   4229  CB  ALA C 145       3.040  41.101  34.759  1.00 46.73      1tnf C  
ATOM   4230  HN  ALA C 145       3.078  41.817  37.862  1.00  0.00      1tnf H  
ATOM   4231  N   GLU C 146       3.819  39.449  37.950  1.00 47.26      1tnf N  
ATOM   4232  CA  GLU C 146       5.015  39.198  38.738  1.00 48.02      1tnf C  
ATOM   4233  C   GLU C 146       6.018  38.052  38.730  1.00 43.72      1tnf C  
ATOM   4234  O   GLU C 146       5.763  36.848  38.704  1.00 46.36      1tnf O  
ATOM   4235  CB  GLU C 146       4.645  39.367  40.262  1.00 47.22      1tnf C  
ATOM   4236  CG  GLU C 146       4.618  40.759  40.913  1.00 46.32      1tnf C  
ATOM   4237  CD  GLU C 146       3.374  41.594  40.607  1.00 47.46      1tnf C  
ATOM   4238  OE1 GLU C 146       2.273  41.035  40.583  1.00 47.96      1tnf O  
ATOM   4239  OE2 GLU C 146       3.491  42.806  40.426  1.00 46.28      1tnf O1-
ATOM   4240  HN  GLU C 146       2.887  39.272  38.326  1.00  0.00      1tnf H  
ATOM   4241  N   SER C 147       7.202  38.574  38.622  1.00 38.80      1tnf N  
ATOM   4242  CA  SER C 147       8.278  37.978  39.371  1.00 40.21      1tnf C  
ATOM   4243  C   SER C 147       9.293  39.106  39.299  1.00 35.79      1tnf C  
ATOM   4244  O   SER C 147       9.331  39.963  40.190  1.00 35.90      1tnf O  
ATOM   4245  CB  SER C 147       8.894  36.643  38.802  1.00 43.18      1tnf C  
ATOM   4246  OG  SER C 147       9.483  36.688  37.499  1.00 47.59      1tnf O  
ATOM   4247  HN  SER C 147       7.365  39.384  38.023  1.00  0.00      1tnf H  
ATOM   4248  HG  SER C 147       9.854  35.884  37.156  1.00  0.00      1tnf H  
ATOM   4249  N   GLY C 148       9.992  39.275  38.189  1.00 31.00      1tnf N  
ATOM   4250  CA  GLY C 148      11.048  40.230  38.159  1.00 27.33      1tnf C  
ATOM   4251  C   GLY C 148      10.648  41.644  37.992  1.00 24.16      1tnf C  
ATOM   4252  O   GLY C 148      11.477  42.401  37.526  1.00 26.64      1tnf O  
ATOM   4253  HN  GLY C 148       9.776  38.724  37.358  1.00  0.00      1tnf H  
ATOM   4254  N   GLN C 149       9.490  42.018  38.480  1.00 19.56      1tnf N  
ATOM   4255  CA  GLN C 149       8.969  43.309  38.205  1.00 20.53      1tnf C  
ATOM   4256  C   GLN C 149       8.765  44.192  39.446  1.00 18.76      1tnf C  
ATOM   4257  O   GLN C 149       8.881  45.431  39.412  1.00 15.98      1tnf O  
ATOM   4258  CB  GLN C 149       7.744  42.939  37.411  1.00 18.12      1tnf C  
ATOM   4259  CG  GLN C 149       7.318  44.096  36.584  1.00 18.72      1tnf C  
ATOM   4260  CD  GLN C 149       6.305  43.653  35.568  1.00 23.98      1tnf C  
ATOM   4261  NE2 GLN C 149       6.544  43.978  34.303  1.00 23.20      1tnf N  
ATOM   4262  OE1 GLN C 149       5.289  43.031  35.915  1.00 27.89      1tnf O  
ATOM   4263  HN  GLN C 149       8.957  41.373  39.064  1.00  0.00      1tnf H  
ATOM   4264 1HE2 GLN C 149       5.856  43.677  33.613  1.00  0.00      1tnf H  
ATOM   4265 2HE2 GLN C 149       7.379  44.489  34.018  1.00  0.00      1tnf H  
ATOM   4266  N   VAL C 150       8.354  43.539  40.552  1.00 18.77      1tnf N  
ATOM   4267  CA  VAL C 150       8.254  44.189  41.866  1.00 15.86      1tnf C  
ATOM   4268  C   VAL C 150       8.928  43.180  42.809  1.00 14.85      1tnf C  
ATOM   4269  O   VAL C 150       8.302  42.167  43.154  1.00 13.53      1tnf O  
ATOM   4270  CB  VAL C 150       6.771  44.428  42.333  1.00 14.39      1tnf C  
ATOM   4271  CG1 VAL C 150       6.870  45.312  43.557  1.00 12.57      1tnf C  
ATOM   4272  CG2 VAL C 150       5.872  45.072  41.281  1.00 11.33      1tnf C  
ATOM   4273  HN  VAL C 150       8.102  42.554  40.473  1.00  0.00      1tnf H  
ATOM   4274  N   TYR C 151      10.174  43.353  43.249  1.00 14.28      1tnf N  
ATOM   4275  CA  TYR C 151      10.843  42.335  44.080  1.00 14.47      1tnf C  
ATOM   4276  C   TYR C 151      11.611  42.985  45.210  1.00 14.26      1tnf C  
ATOM   4277  O   TYR C 151      11.795  44.215  45.112  1.00 15.27      1tnf O  
ATOM   4278  CB  TYR C 151      11.779  41.519  43.202  1.00 11.94      1tnf C  
ATOM   4279  CG  TYR C 151      12.703  42.342  42.295  1.00 15.17      1tnf C  
ATOM   4280  CD1 TYR C 151      12.434  42.470  40.937  1.00 15.27      1tnf C  
ATOM   4281  CD2 TYR C 151      13.833  42.956  42.811  1.00 15.79      1tnf C  
ATOM   4282  CE1 TYR C 151      13.267  43.186  40.094  1.00 14.18      1tnf C  
ATOM   4283  CE2 TYR C 151      14.676  43.672  41.984  1.00 18.52      1tnf C  
ATOM   4284  CZ  TYR C 151      14.407  43.794  40.616  1.00 17.66      1tnf C  
ATOM   4285  OH  TYR C 151      15.311  44.491  39.808  1.00 13.62      1tnf O  
ATOM   4286  HN  TYR C 151      10.675  44.207  43.006  1.00  0.00      1tnf H  
ATOM   4287  HH  TYR C 151      15.128  44.574  38.879  1.00  0.00      1tnf H  
ATOM   4288  N   PHE C 152      12.063  42.224  46.240  1.00 15.72      1tnf N  
ATOM   4289  CA  PHE C 152      12.901  42.721  47.380  1.00 13.81      1tnf C  
ATOM   4290  C   PHE C 152      13.991  41.724  47.827  1.00 11.63      1tnf C  
ATOM   4291  O   PHE C 152      13.692  40.521  47.807  1.00 11.70      1tnf O  
ATOM   4292  CB  PHE C 152      12.002  43.048  48.621  1.00 13.34      1tnf C  
ATOM   4293  CG  PHE C 152      12.606  43.823  49.808  1.00  8.39      1tnf C  
ATOM   4294  CD1 PHE C 152      11.820  44.050  50.896  1.00  5.20      1tnf C  
ATOM   4295  CD2 PHE C 152      13.901  44.314  49.816  1.00  9.79      1tnf C  
ATOM   4296  CE1 PHE C 152      12.330  44.763  51.957  1.00  6.32      1tnf C  
ATOM   4297  CE2 PHE C 152      14.427  45.029  50.879  1.00 11.99      1tnf C  
ATOM   4298  CZ  PHE C 152      13.619  45.262  51.972  1.00  9.71      1tnf C  
ATOM   4299  HN  PHE C 152      11.812  41.235  46.238  1.00  0.00      1tnf H  
ATOM   4300  N   GLY C 153      15.210  42.127  48.233  1.00  6.65      1tnf N  
ATOM   4301  CA  GLY C 153      16.202  41.187  48.701  1.00  9.63      1tnf C  
ATOM   4302  C   GLY C 153      17.454  41.748  49.385  1.00 13.08      1tnf C  
ATOM   4303  O   GLY C 153      17.858  42.912  49.245  1.00 12.92      1tnf O  
ATOM   4304  HN  GLY C 153      15.439  43.121  48.209  1.00  0.00      1tnf H  
ATOM   4305  N   ILE C 154      18.035  40.812  50.146  1.00 11.82      1tnf N  
ATOM   4306  CA  ILE C 154      19.250  40.984  50.908  1.00 10.56      1tnf C  
ATOM   4307  C   ILE C 154      20.022  39.693  50.773  1.00 12.44      1tnf C  
ATOM   4308  O   ILE C 154      19.443  38.606  50.559  1.00  7.32      1tnf O  
ATOM   4309  CB  ILE C 154      19.121  41.176  52.469  1.00 11.44      1tnf C  
ATOM   4310  CG1 ILE C 154      18.157  40.194  53.082  1.00 11.04      1tnf C  
ATOM   4311  CG2 ILE C 154      18.719  42.590  52.751  1.00 12.35      1tnf C  
ATOM   4312  CD1 ILE C 154      18.404  39.800  54.537  1.00 10.92      1tnf C  
ATOM   4313  HN  ILE C 154      17.581  39.900  50.192  1.00  0.00      1tnf H  
ATOM   4314  N   ILE C 155      21.340  39.901  50.897  1.00 15.15      1tnf N  
ATOM   4315  CA  ILE C 155      22.290  38.809  51.048  1.00 20.41      1tnf C  
ATOM   4316  C   ILE C 155      23.517  39.237  51.853  1.00 23.66      1tnf C  
ATOM   4317  O   ILE C 155      24.015  40.380  51.702  1.00 25.65      1tnf O  
ATOM   4318  CB  ILE C 155      22.689  38.305  49.684  1.00 21.34      1tnf C  
ATOM   4319  CG1 ILE C 155      23.477  37.019  49.886  1.00 22.29      1tnf C  
ATOM   4320  CG2 ILE C 155      23.400  39.405  48.907  1.00 19.99      1tnf C  
ATOM   4321  CD1 ILE C 155      23.278  36.067  48.693  1.00 22.88      1tnf C  
ATOM   4322  HN  ILE C 155      21.690  40.859  50.885  1.00  0.00      1tnf H  
ATOM   4323  N   ALA C 156      23.991  38.350  52.742  1.00 20.68      1tnf N  
ATOM   4324  CA  ALA C 156      25.112  38.793  53.582  1.00 22.25      1tnf C  
ATOM   4325  C   ALA C 156      26.392  38.604  52.789  1.00 21.68      1tnf C  
ATOM   4326  O   ALA C 156      26.500  37.629  52.030  1.00 21.40      1tnf O  
ATOM   4327  CB  ALA C 156      25.159  37.992  54.935  1.00 18.71      1tnf C  
ATOM   4328  HN  ALA C 156      23.593  37.415  52.830  1.00  0.00      1tnf H  
ATOM   4329  N   LEU C 157      27.244  39.627  52.858  1.00 21.98      1tnf N  
ATOM   4330  CA  LEU C 157      28.544  39.590  52.224  1.00 25.17      1tnf C  
ATOM   4331  C   LEU C 157      29.508  39.713  53.399  1.00 26.61      1tnf C  
ATOM   4332  O   LEU C 157      30.023  40.797  53.711  1.00 28.30      1tnf O  
ATOM   4333  CB  LEU C 157      28.736  40.770  51.244  1.00 25.98      1tnf C  
ATOM   4334  CG  LEU C 157      27.773  41.068  50.116  1.00 24.69      1tnf C  
ATOM   4335  CD1 LEU C 157      28.290  42.228  49.287  1.00 28.41      1tnf C  
ATOM   4336  CD2 LEU C 157      27.635  39.863  49.242  1.00 23.47      1tnf C  
ATOM   4337  OXT LEU C 157      29.679  38.681  54.054  1.00 32.30      1tnf O1-
ATOM   4338  HN  LEU C 157      26.971  40.463  53.375  1.00  0.00      1tnf H  
ATOM   4339  N   *** d   0       5.332  64.345  30.868  0.00  0.00      1tnf N  
ATOM   4340  N   *** d   0       7.226  64.660  27.872  0.00  0.00      1tnf N  
ATOM   4341  C   *** d   0       4.801  64.869  27.553  0.00  0.00      1tnf C  
ATOM   4342  C   *** d   0       4.496  65.547  28.899  0.00  0.00      1tnf C  
ATOM   4343  C   *** d   0       4.168  64.523  29.997  0.00  0.00      1tnf C  
ATOM   4344  C   *** d   0       5.938  63.134  31.045  0.00  0.00      1tnf C  
ATOM   4345  C   *** d   0       7.010  63.101  31.883  0.00  0.00      1tnf C  
ATOM   4346  C   *** d   0       7.848  64.124  32.138  0.00  0.00      1tnf C  
ATOM   4347  C   *** d   0       8.916  64.121  32.965  0.00  0.00      1tnf C  
ATOM   4348  C   *** d   0       9.404  62.940  33.398  0.00  0.00      1tnf C  
ATOM   4349  C   *** d   0      10.462  62.868  34.221  0.00  0.00      1tnf C  
ATOM   4350  C   *** d   0      11.087  63.975  34.653  0.00  0.00      1tnf C  
ATOM   4351  C   *** d   0      10.607  65.153  34.227  0.00  0.00      1tnf C  
ATOM   4352  C   *** d   0       9.548  65.227  33.403  0.00  0.00      1tnf C  
ATOM   4353  C   *** d   0       6.189  65.251  27.020  0.00  0.00      1tnf C  
ATOM   4354  C   *** d   0       7.636  63.364  27.736  0.00  0.00      1tnf C  
ATOM   4355  C   *** d   0       8.594  62.932  28.602  0.00  0.00      1tnf C  
ATOM   4356  C   *** d   0       8.707  61.688  29.102  0.00  0.00      1tnf C  
ATOM   4357  C   *** d   0       9.649  61.234  29.959  0.00  0.00      1tnf C  
ATOM   4358  C   *** d   0       9.404  60.130  30.691  0.00  0.00      1tnf C  
ATOM   4359  C   *** d   0      10.256  59.576  31.579  0.00  0.00      1tnf C  
ATOM   4360  C   *** d   0      11.455  60.183  31.740  0.00  0.00      1tnf C  
ATOM   4361  C   *** d   0      11.719  61.286  31.021  0.00  0.00      1tnf C  
ATOM   4362  C   *** d   0      10.848  61.810  30.149  0.00  0.00      1tnf C  
ATOM   4363  C   *** d   0      10.190  57.160  31.782  0.00  0.00      1tnf C  
ATOM   4364  O   *** d   0       5.535  62.143  30.479  0.00  0.00      1tnf O  
ATOM   4365  O   *** d   0      12.160  63.912  35.486  0.00  0.00      1tnf O  
ATOM   4366  O   *** d   0       7.165  62.642  26.888  0.00  0.00      1tnf O  
ATOM   4367  O   *** d   0       9.813  58.441  32.224  0.00  0.00      1tnf O  
ATOM   4368  O   *** d   0      12.417  59.742  32.595  0.00  0.00      1tnf O  
ATOM   4369  H   *** d   0       5.709  65.157  31.353  0.00  0.00      1tnf H  
ATOM   4370  H   *** d   0      12.832  63.331  35.096  0.00  0.00      1tnf H  
ATOM   4371  H   *** d   0       7.631  65.228  28.612  0.00  0.00      1tnf H  
ATOM   4372  H   *** d   0      12.684  58.841  32.352  0.00  0.00      1tnf H  
END
