# Supplementary material for: A Network Pharmacology-Based Study on Irritable Bowel Syndrome Prevention and Treatment Utilizing Shenling Baizhu Powder
Source: Biomed Res Int. 2021 Nov 23;2021:4579850. doi: 10.1155/2021/4579850 (PMC8632384; doi:10.1155/2021/4579850)
Supplement: Supplementary Materials — Please find detailed data in the supplementary file, including the original data of SymMap, metabolomics, and molecular docking of Shenling Baizhu powder. “Shenling Baizhu powder SymMap” includes all herbal targets and combined targets. “Shenling Baizhu powder metabolomics” includes two-dimensional structural data analysis. “Molecular docking” involves molecule-target docking and the results. [file 4579850.f1.zip › Data in brief/3. Molecular docking/Results of molecular docking/76-2.pdb]

REMARK   4 XXXX COMPLIES WITH FORMAT V. 2.0
ATOM      1  C   *** d   *       4.895  65.359  28.841  0.00  0.00      1tnf C  
ATOM      2  C   *** d   *       6.065  64.815  28.362  0.00  0.00      1tnf C  
ATOM      3  O   *** d   *       6.454  64.974  27.222  0.00  0.00      1tnf O  
ATOM      4  C   *** d   *       4.540  65.012  30.098  0.00  0.00      1tnf C  
ATOM      5  O   *** d   *       5.223  64.160  30.901  0.00  0.00      1tnf O  
ATOM      6  C   *** d   *       6.404  63.705  30.415  0.00  0.00      1tnf C  
ATOM      7  C   *** d   *       6.820  64.012  29.175  0.00  0.00      1tnf C  
ATOM      8  C   *** d   *       8.001  63.502  28.768  0.00  0.00      1tnf C  
ATOM      9  C   *** d   *       8.743  62.728  29.571  0.00  0.00      1tnf C  
ATOM     10  C   *** d   *       8.349  62.398  30.812  0.00  0.00      1tnf C  
ATOM     11  C   *** d   *       7.170  62.920  31.197  0.00  0.00      1tnf C  
ATOM     12  O   *** d   *       9.199  61.668  31.606  0.00  0.00      1tnf O  
ATOM     13  C   *** d   *       8.750  60.459  32.172  0.00  0.00      1tnf C  
ATOM     14  C   *** d   *       8.625  59.381  31.117  0.00  0.00      1tnf C  
ATOM     15  C   *** d   *       9.955  58.792  30.693  0.00  0.00      1tnf C  
ATOM     16  C   *** d   *      10.756  58.418  31.924  0.00  0.00      1tnf C  
ATOM     17  C   *** d   *      10.837  59.542  32.948  0.00  0.00      1tnf C  
ATOM     18  O   *** d   *       9.587  60.097  33.251  0.00  0.00      1tnf O  
ATOM     19  O   *** d   *       7.809  58.342  31.615  0.00  0.00      1tnf O  
ATOM     20  H   *** d   *       7.066  58.709  32.099  0.00  0.00      1tnf H  
ATOM     21  O   *** d   *      10.671  59.718  29.915  0.00  0.00      1tnf O  
ATOM     22  H   *** d   *      10.342  59.722  29.015  0.00  0.00      1tnf H  
ATOM     23  O   *** d   *      10.128  57.311  32.532  0.00  0.00      1tnf O  
ATOM     24  H   *** d   *      10.010  56.600  31.900  0.00  0.00      1tnf H  
ATOM     25  C   *** d   *      11.900  60.596  32.666  0.00  0.00      1tnf C  
ATOM     26  O   *** d   *      12.971  60.015  31.943  0.00  0.00      1tnf O  
ATOM     27  H   *** d   *      13.780  60.067  32.463  0.00  0.00      1tnf H  
ATOM     28  C   *** d   *       4.133  66.263  28.152  0.00  0.00      1tnf C  
ATOM     29  C   *** d   *       4.365  67.596  28.215  0.00  0.00      1tnf C  
ATOM     30  C   *** d   *       3.644  68.522  27.560  0.00  0.00      1tnf C  
ATOM     31  C   *** d   *       2.619  68.180  26.767  0.00  0.00      1tnf C  
ATOM     32  C   *** d   *       2.372  66.868  26.664  0.00  0.00      1tnf C  
ATOM     33  C   *** d   *       3.103  65.958  27.329  0.00  0.00      1tnf C  
ATOM     34  O   *** d   *       1.881  69.102  26.093  0.00  0.00      1tnf O  
ATOM     35  H   *** d   *       1.301  68.642  25.465  0.00  0.00      1tnf H  
TER      36      *** d   * 
