# Supplementary material for: A Network Pharmacology-Based Study on Irritable Bowel Syndrome Prevention and Treatment Utilizing Shenling Baizhu Powder
Source: Biomed Res Int. 2021 Nov 23;2021:4579850. doi: 10.1155/2021/4579850 (PMC8632384; doi:10.1155/2021/4579850)
Supplement: Supplementary Materials — Please find detailed data in the supplementary file, including the original data of SymMap, metabolomics, and molecular docking of Shenling Baizhu powder. “Shenling Baizhu powder SymMap” includes all herbal targets and combined targets. “Shenling Baizhu powder metabolomics” includes two-dimensional structural data analysis. “Molecular docking” involves molecule-target docking and the results. [file 4579850.f1.zip › Data in brief/3. Molecular docking/Results of molecular docking/79-2.pdb]

REMARK   4 XXXX COMPLIES WITH FORMAT V. 2.0
ATOM      1  O   *** d   *       7.035  63.981  27.022  0.00  0.00      1tnf O  
ATOM      2  O   *** d   *       4.465  65.506  29.628  0.00  0.00      1tnf O  
ATOM      3  C   *** d   *       7.179  61.532  29.645  0.00  0.00      1tnf C  
ATOM      4  C   *** d   *       7.374  62.217  28.503  0.00  0.00      1tnf C  
ATOM      5  C   *** d   *       6.306  62.090  30.500  0.00  0.00      1tnf C  
ATOM      6  C   *** d   *       6.773  63.387  28.213  0.00  0.00      1tnf C  
ATOM      7  C   *** d   *       5.916  63.928  29.095  0.00  0.00      1tnf C  
ATOM      8  C   *** d   *       5.689  63.252  30.240  0.00  0.00      1tnf C  
ATOM      9  C   *** d   *       5.295  65.119  28.827  0.00  0.00      1tnf C  
ATOM     10  C   *** d   *       5.591  65.795  27.666  0.00  0.00      1tnf C  
ATOM     11  C   *** d   *       6.461  65.193  26.825  0.00  0.00      1tnf C  
ATOM     12  O   *** d   *       7.760  60.334  29.983  0.00  0.00      1tnf O  
ATOM     13  C   *** d   *       8.765  60.288  30.969  0.00  0.00      1tnf C  
ATOM     14  O   *** d   *       9.947  60.748  30.350  0.00  0.00      1tnf O  
ATOM     15  C   *** d   *      11.049  60.736  31.219  0.00  0.00      1tnf C  
ATOM     16  C   *** d   *      11.319  59.322  31.719  0.00  0.00      1tnf C  
ATOM     17  C   *** d   *      10.077  58.751  32.375  0.00  0.00      1tnf C  
ATOM     18  C   *** d   *       8.933  58.846  31.391  0.00  0.00      1tnf C  
ATOM     19  C   *** d   *      12.241  61.349  30.499  0.00  0.00      1tnf C  
ATOM     20  O   *** d   *      13.295  60.414  30.397  0.00  0.00      1tnf O  
ATOM     21  H   *** d   *      12.936  59.556  30.157  0.00  0.00      1tnf H  
ATOM     22  O   *** d   *      12.351  59.320  32.674  0.00  0.00      1tnf O  
ATOM     23  H   *** d   *      12.579  60.236  32.862  0.00  0.00      1tnf H  
ATOM     24  O   *** d   *      10.299  57.408  32.718  0.00  0.00      1tnf O  
ATOM     25  H   *** d   *      10.133  56.865  31.942  0.00  0.00      1tnf H  
ATOM     26  O   *** d   *       7.755  58.396  32.011  0.00  0.00      1tnf O  
ATOM     27  H   *** d   *       7.321  59.143  32.429  0.00  0.00      1tnf H  
ATOM     28  C   *** d   *       5.117  67.042  27.364  0.00  0.00      1tnf C  
ATOM     29  C   *** d   *       5.672  68.169  27.868  0.00  0.00      1tnf C  
ATOM     30  C   *** d   *       5.241  69.411  27.596  0.00  0.00      1tnf C  
ATOM     31  C   *** d   *       4.195  69.658  26.791  0.00  0.00      1tnf C  
ATOM     32  C   *** d   *       3.609  68.554  26.297  0.00  0.00      1tnf C  
ATOM     33  C   *** d   *       4.054  67.317  26.574  0.00  0.00      1tnf C  
ATOM     34  O   *** d   *       3.806  70.955  26.564  0.00  0.00      1tnf O  
ATOM     35  C   *** d   *       4.042  71.917  27.565  0.00  0.00      1tnf C  
TER      36      *** d   * 
