# Supplementary material for: A Network Pharmacology-Based Study on Irritable Bowel Syndrome Prevention and Treatment Utilizing Shenling Baizhu Powder
Source: Biomed Res Int. 2021 Nov 23;2021:4579850. doi: 10.1155/2021/4579850 (PMC8632384; doi:10.1155/2021/4579850)
Supplement: Supplementary Materials — Please find detailed data in the supplementary file, including the original data of SymMap, metabolomics, and molecular docking of Shenling Baizhu powder. “Shenling Baizhu powder SymMap” includes all herbal targets and combined targets. “Shenling Baizhu powder metabolomics” includes two-dimensional structural data analysis. “Molecular docking” involves molecule-target docking and the results. [file 4579850.f1.zip › Data in brief/3. Molecular docking/Results of molecular docking/80-2.pdb]

REMARK   4 XXXX COMPLIES WITH FORMAT V. 2.0
ATOM      1  O   *** d   *       6.665  65.025  26.418  0.00  0.00      1tnf O  
ATOM      2  C   *** d   *       6.623  64.899  27.626  0.00  0.00      1tnf C  
ATOM      3  C   *** d   *       6.253  65.956  28.428  0.00  0.00      1tnf C  
ATOM      4  C   *** d   *       5.719  67.126  27.961  0.00  0.00      1tnf C  
ATOM      5  C   *** d   *       5.646  68.239  28.729  0.00  0.00      1tnf C  
ATOM      6  C   *** d   *       5.131  69.410  28.318  0.00  0.00      1tnf C  
ATOM      7  C   *** d   *       4.627  69.559  27.086  0.00  0.00      1tnf C  
ATOM      8  C   *** d   *       4.663  68.473  26.303  0.00  0.00      1tnf C  
ATOM      9  C   *** d   *       5.184  67.311  26.732  0.00  0.00      1tnf C  
ATOM     10  C   *** d   *       6.359  65.768  29.759  0.00  0.00      1tnf C  
ATOM     11  O   *** d   *       6.837  64.647  30.344  0.00  0.00      1tnf O  
ATOM     12  C   *** d   *       7.082  63.594  29.524  0.00  0.00      1tnf C  
ATOM     13  C   *** d   *       7.000  63.700  28.181  0.00  0.00      1tnf C  
ATOM     14  C   *** d   *       7.293  62.613  27.425  0.00  0.00      1tnf C  
ATOM     15  C   *** d   *       7.656  61.476  28.041  0.00  0.00      1tnf C  
ATOM     16  C   *** d   *       7.748  61.365  29.369  0.00  0.00      1tnf C  
ATOM     17  C   *** d   *       7.413  62.428  30.118  0.00  0.00      1tnf C  
ATOM     18  O   *** d   *       7.552  62.333  31.480  0.00  0.00      1tnf O  
ATOM     19  C   *** d   *       8.692  61.638  31.942  0.00  0.00      1tnf C  
ATOM     20  C   *** d   *       8.716  61.675  33.453  0.00  0.00      1tnf C  
ATOM     21  C   *** d   *       9.972  61.007  33.980  0.00  0.00      1tnf C  
ATOM     22  C   *** d   *      11.196  61.581  33.286  0.00  0.00      1tnf C  
ATOM     23  C   *** d   *      11.039  61.698  31.772  0.00  0.00      1tnf C  
ATOM     24  O   *** d   *       9.823  62.305  31.435  0.00  0.00      1tnf O  
ATOM     25  O   *** d   *       8.699  63.021  33.880  0.00  0.00      1tnf O  
ATOM     26  H   *** d   *       7.959  63.483  33.481  0.00  0.00      1tnf H  
ATOM     27  O   *** d   *       9.899  59.620  33.753  0.00  0.00      1tnf O  
ATOM     28  H   *** d   *      10.106  59.141  34.558  0.00  0.00      1tnf H  
ATOM     29  O   *** d   *      11.416  62.877  33.797  0.00  0.00      1tnf O  
ATOM     30  H   *** d   *      12.296  62.946  34.171  0.00  0.00      1tnf H  
ATOM     31  C   *** d   *      11.272  60.418  30.979  0.00  0.00      1tnf C  
ATOM     32  O   *** d   *      12.165  59.582  31.688  0.00  0.00      1tnf O  
ATOM     33  H   *** d   *      11.942  58.662  31.532  0.00  0.00      1tnf H  
ATOM     34  O   *** d   *       8.105  60.196  29.972  0.00  0.00      1tnf O  
ATOM     35  H   *** d   *       8.505  59.619  29.295  0.00  0.00      1tnf H  
ATOM     36  O   *** d   *       7.237  62.564  26.062  0.00  0.00      1tnf O  
ATOM     37  H   *** d   *       8.066  62.913  25.696  0.00  0.00      1tnf H  
ATOM     38  O   *** d   *       4.099  70.734  26.653  0.00  0.00      1tnf O  
ATOM     39  H   *** d   *       4.430  70.918  25.759  0.00  0.00      1tnf H  
TER      40      *** d   * 
